# Supplementary material for: Nucleophile-induced ring contraction in pyrrolo[2,1-c][1,4]benzothiazines: access to pyrrolo[2,1-b][1,3]benzothiazoles
Source: publisher site journal article supplement (doi:10.3762/bjoc.19.46), 2023-05-11
Supplement: Additional file 1 [file 1860-5397-19-46-S1.pdf]

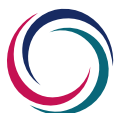

## Supporting Information

for

### **Nucleophile-induced ring contraction in pyrrolo[2,1-c][1,4]benzothiazines: access to pyrrolo[2,1-b][1,3]benzothiazoles**

Ekaterina A. Lystsova, Maksim V. Dmitriev, Andrey N. Maslivets  
and Ekaterina E. Khramtsova

*Beilstein J. Org. Chem.* **2023**, *19*, 646–657. [doi:10.3762/bjoc.19.46](https://doi.org/10.3762/bjoc.19.46)

**Further experimental details, copies of NMR spectra, X-ray crystallographic details, optimization by HPLC-UV details**

## Table of contents

|                                                                                                                                                    |      |
|----------------------------------------------------------------------------------------------------------------------------------------------------|------|
| General.....                                                                                                                                       | S3   |
| 3-Aroylpyrrolo[2,1- <i>c</i> ][1,4]benzothiazine-1,2,4-triones ( <b>1c,g,h</b> ). General procedure.....                                           | S4   |
| Alkyl 3-aroyl-2-hydroxy-1-oxopyrrolo[2,1- <i>b</i> ][1,3]benzothiazole-3a(1 <i>H</i> )-carboxylates <b>3</b> . General procedure.....              | S14  |
| 3-Aroyl-2-hydroxy-3a-methoxy-1 <i>H</i> -pyrrolo[2,1- <i>c</i> ][1,4]benzothiazine-1,4(3a <i>H</i> )-diones <b>5</b> . General procedure.....      | S64  |
| 3-Aroyl-2,3a-dihydroxy-1 <i>H</i> -pyrrolo[2,1- <i>c</i> ][1,4]benzothiazine-1,4(3a <i>H</i> )-diones <b>6</b> . General procedure.....            | S74  |
| 3-Aroyl- <i>N</i> -benzyl-2-hydroxy-1-oxopyrrolo[2,1- <i>b</i> ][1,3]benzothiazole-3a(1 <i>H</i> )-carboxamides <b>7</b> . General procedure ..... | S84  |
| 1-(Morpholin-4-yl)-3-(2-oxo-2 <i>H</i> -1,4-benzothiazin-3(4 <i>H</i> )-ylidene)-4-phenylbutane-1,2,4-trione ( <b>10a</b> ).....                   | S111 |
| <i>N</i> -Aryl-3-aroyl-2-hydroxy-1-oxopyrrolo[2,1- <i>b</i> ][1,3]benzothiazole-3a(1 <i>H</i> )-carboxamides <b>12</b> . General procedure.....    | S115 |
| <i>N</i> -Mesityl-2,4-dioxo-3-(2-oxo-2 <i>H</i> -1,4-benzothiazin-3(4 <i>H</i> )-ylidene)-4-phenylbutanamide ( <b>14ab</b> ).....                  | S178 |
| 3-Benzoylpyrrolo[2,1- <i>b</i> ][1,3]benzothiazole-1,2-dione <b>17a</b> .....                                                                      | S182 |
| Preparation of samples for HPLC-UV analyses for optimization. General procedure to compounds <b>4, 8, 13</b> .....                                 | S186 |
| Crystal structure determination.....                                                                                                               | S197 |
| References.....                                                                                                                                    | S215 |

## Experimental

### General

$^1\text{H}$  and  $^{13}\text{C}$  NMR spectra were acquired on a Bruker Avance-III spectrometer (400 and 100 MHz, respectively) in  $\text{CDCl}_3$  or  $\text{DMSO}-d_6$  using the HMDS signal (in  $^1\text{H}$  NMR) or solvent residual signals (in  $^{13}\text{C}$  NMR, 77.00 for  $\text{CDCl}_3$ , 39.52 for  $\text{DMSO}-d_6$ ; in  $^1\text{H}$  NMR, 7.27 for  $\text{CDCl}_3$ , 2.50 for  $\text{DMSO}-d_6$ ) as internal standards.  $^{13}\text{C}$  ssNMR spectra were acquired on a Bruker Avance III 400 WB NMR spectrometer (at 100 MHz). IR spectra were recorded on a Perkin–Elmer Spectrum Two spectrometer from mulls in mineral oil or from thin layers obtained from  $\text{CHCl}_3$  solutions. Melting points were measured on a Mettler Toledo MP70 apparatus. Single crystal X-ray analyses were performed on an Xcalibur Ruby diffractometer. Elemental analyses were carried out on a Vario MICRO Cube analyzer. The reaction conditions were optimized using HPLC–UV [Hitachi Chromaster system; NUCLEODUR C18 Gravity column; grain size of 5  $\mu\text{m}$ ; acetonitrile–water as eluents; flow rate of 1.5 mL/min; Hitachi Chromaster 5430 diode array detector (wavelength range of 210–750 nm)] and UPLC–UV–MS [Waters ACQUITY UPLC I-Class system; Acquity UPLC BEH C18 column, grain size of 1.7  $\mu\text{m}$ ; acetonitrile–water as eluents; flow rate of 0.6 mL/min; ACQUITY UPLC PDA e $\lambda$  Detector (wavelength range of 230–780 nm); Xevo TQD mass detector; electrospray ionization; positive and negative ion detection; ion source temperature of 150  $^\circ\text{C}$ ; capillary voltage of 3500–4000 V; cone voltage of 20–70 V; vaporizer temperature of 200  $^\circ\text{C}$ ]. Thin-layer chromatography (TLC) was performed on Merck silica gel 60 F<sub>254</sub> plates using EtOAc/toluene, 1:5 v/v, toluene, EtOAc as eluents. Column chromatography was performed on silica gel (Chrom-lab, KSKG, 63–200  $\mu\text{m}$ ).

APBTTs **1a,b,d,e,f** were prepared according to a reported procedure [1] from enaminones **15** [2] and commercially available reagents. APBTTs **1c,g,h** were prepared according to a general procedure described below from enaminones **15** [2] and commercially available reagents. Toluene, benzene, hexane, and 1,4-dioxane were distilled over Na before the use. Butyl acetate, chloroform, and acetone were distilled over  $\text{P}_2\text{O}_5$  before the use. Alkanols **2** were dried over molecular sieves 4 $\text{\AA}$  before the use. All other solvents and reagents were purchased from commercial vendors and were used as received. All operations with compounds **1** were carried out in oven-dried glassware.

### 3-Aroylpyrrolo[2,1-c][1,4]benzothiazine-1,2,4-triones (1c,g,h). General procedure.

In a round-bottomed double-necked flask with a reflux condenser equipped with a drying tube (CaCl<sub>2</sub>), the corresponding enaminone **15** (3.6 mmol) and anhydrous benzene (30 mL) are placed. Argon is bubbled through the reaction mixture throughout the reaction. Oxalyl chloride (5.4 mmol, 0.46 mL) is added to the obtained suspension. The mixture is refluxed until HCl evolution stops (about 6 h, indicator paper control). While the reaction mixture has not yet cooled down, the formed dark violet spongy precipitate of APBTT **1** is filtered off, washed with hot (60–65 °C) anhydrous benzene (10–15 mL), dried in a laboratory oven at 90–95 °C for 30 min. The obtained APBTT **1** is pure enough for the subsequent reactions and does not need any additional purification procedures. Compounds **1** should be stored in a desiccator. APBTTs **1** readily undergo to a hydration reaction, which is typical for such compounds [3]. By this reason, and because of poor solubility of APBTTs **1** in CDCl<sub>3</sub> and DMSO-*d*<sub>6</sub>, we did not succeed to acquire their <sup>13</sup>C NMR spectra in solutions. Because of this, their <sup>13</sup>C NMR spectra were acquired as solid-state NMR (ssNMR) spectra, and their <sup>1</sup>H NMR spectra were acquired immediately after the dissolution in DMSO-*d*<sub>6</sub>.

#### 3-(4-Methoxybenzoyl)pyrrolo[2,1-c][1,4]benzothiazine-1,2,4-trione (1c)

Dark violet solid; yield (1118 mg, 85%); mp 155–157 °C (decomp., benzene).

<sup>1</sup>H NMR (400 MHz, DMSO-*d*<sub>6</sub>): δ = 8.72 (m, 1H), 8.04 (m, 2H), 7.50 (m, 2H), 7.37 (m, 1H), 7.05 (m, 2H), 3.87 (s, 3H) ppm.

<sup>13</sup>C ssNMR (100 MHz): δ = 186.7, 179.9, 171.4, 167.6, 165.5, 163.5, 156.7, 149.1, 136.2, 134.1, 132.4, 130.9, 128.6, 125.9, 118.9, 117.4, 112.7, 110.1, 55.8 ppm.

IR (thin layer obtained from CHCl<sub>3</sub>): 1741, 1703, 1646 cm<sup>-1</sup>.

EA: Found: C, 62.66; H, 3.15; N, 3.92. Calc. for C<sub>19</sub>H<sub>11</sub>NO<sub>5</sub>S: C, 62.46; H, 3.03; N, 3.83.

#### 3-(4-Fluorobenzoyl)pyrrolo[2,1-c][1,4]benzothiazine-1,2,4-trione (1d)

Dark violet solid; yield (992 mg, 78%); mp 174–176 °C (decomp., benzene).

<sup>1</sup>H NMR (400 MHz, DMSO-*d*<sub>6</sub>): δ = 8.73 (m, 1H), 8.18 (m, 2H), 7.54 (m, 2H), 7.37 (m, 3H) ppm.

<sup>13</sup>C ssNMR (100 MHz): δ = 187.5, 181.5, 180.7, 169.0, 168.6, 166.2, 156.4, 149.8, 137.3, 135.0, 132.6, 128.1, 125.3, 119.7, 119.2, 116.6, 116.2, 110.1 ppm.

IR (mineral oil): 1773, 1736, 1656 cm<sup>-1</sup>.

EA: Found: C, 61.32; H, 2.30; N, 4.00. Calc. for C<sub>18</sub>H<sub>8</sub>FNO<sub>4</sub>S: C, 61.19; H, 2.28; N, 3.96.

#### 3-(Furan-2-carbonyl)pyrrolo[2,1-c][1,4]benzothiazine-1,2,4-trione (1g)

Dark violet solid; yield (1030 mg, 88%); mp 190–192 °C (decomp., benzene).

<sup>1</sup>H NMR (400 MHz, DMSO-*d*<sub>6</sub>): δ = 8.71 (m, 1H), 8.07 (s, 1H), 7.65 (m, 1H), 7.53 (m, 2H), 7.34 (m, 1H), 6.72 (m, 1H) ppm.

$^{13}\text{C}$  ssNMR (100 MHz):  $\delta$  = 182.4, 176.9, 176.1, 154.8, 152.6, 150.7, 132.7, 129.3, 127.8, 126.7, 119.9, 114.8, 107.8 ppm.

IR (mineral oil): 1774, 1727, 1631  $\text{cm}^{-1}$ .

EA: Found: C, 59.23; H, 2.33; N, 4.42. Calc. for  $\text{C}_{16}\text{H}_7\text{NO}_5\text{S}$ : C, 59.08; H, 2.17; N, 4.31.

### **3-(Thiophene-2-carbonyl)pyrrolo[2,1-c][1,4]benzothiazine-1,2,4-trione (1h)**

Dark violet solid; yield (1204 mg, 98%); mp 197–199 °C (decomp., benzene).

$^1\text{H}$  NMR (400 MHz,  $\text{DMSO-}d_6$ ):  $\delta$  = 8.72 (m, 1H), 8.09 (m, 2H), 7.53 (m, 2H), 7.34 (m, 1H), 7.23 (m, 1H) ppm.

$^{13}\text{C}$  ssNMR (100 MHz):  $\delta$  = 181.1, 179.8, 155.3, 148.3, 145.2, 141.1, 140.0, 137.9, 129.4, 128.6, 127.6, 127.2, 120.5, 117.4, 110.6, 99.4 ppm.

IR (mineral oil): 1776, 1735, 1665, 1650  $\text{cm}^{-1}$ .

EA: Found: C, 56.53; H, 2.31; N, 4.13. Calc. for  $\text{C}_{16}\text{H}_7\text{NO}_4\text{S}_2$ : C, 56.30; H, 2.07; N, 4.10.

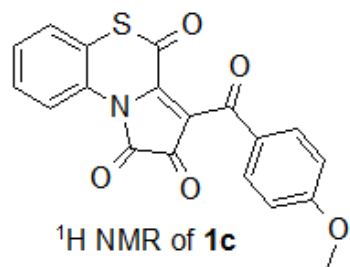

contains signals of hydration products of **1**

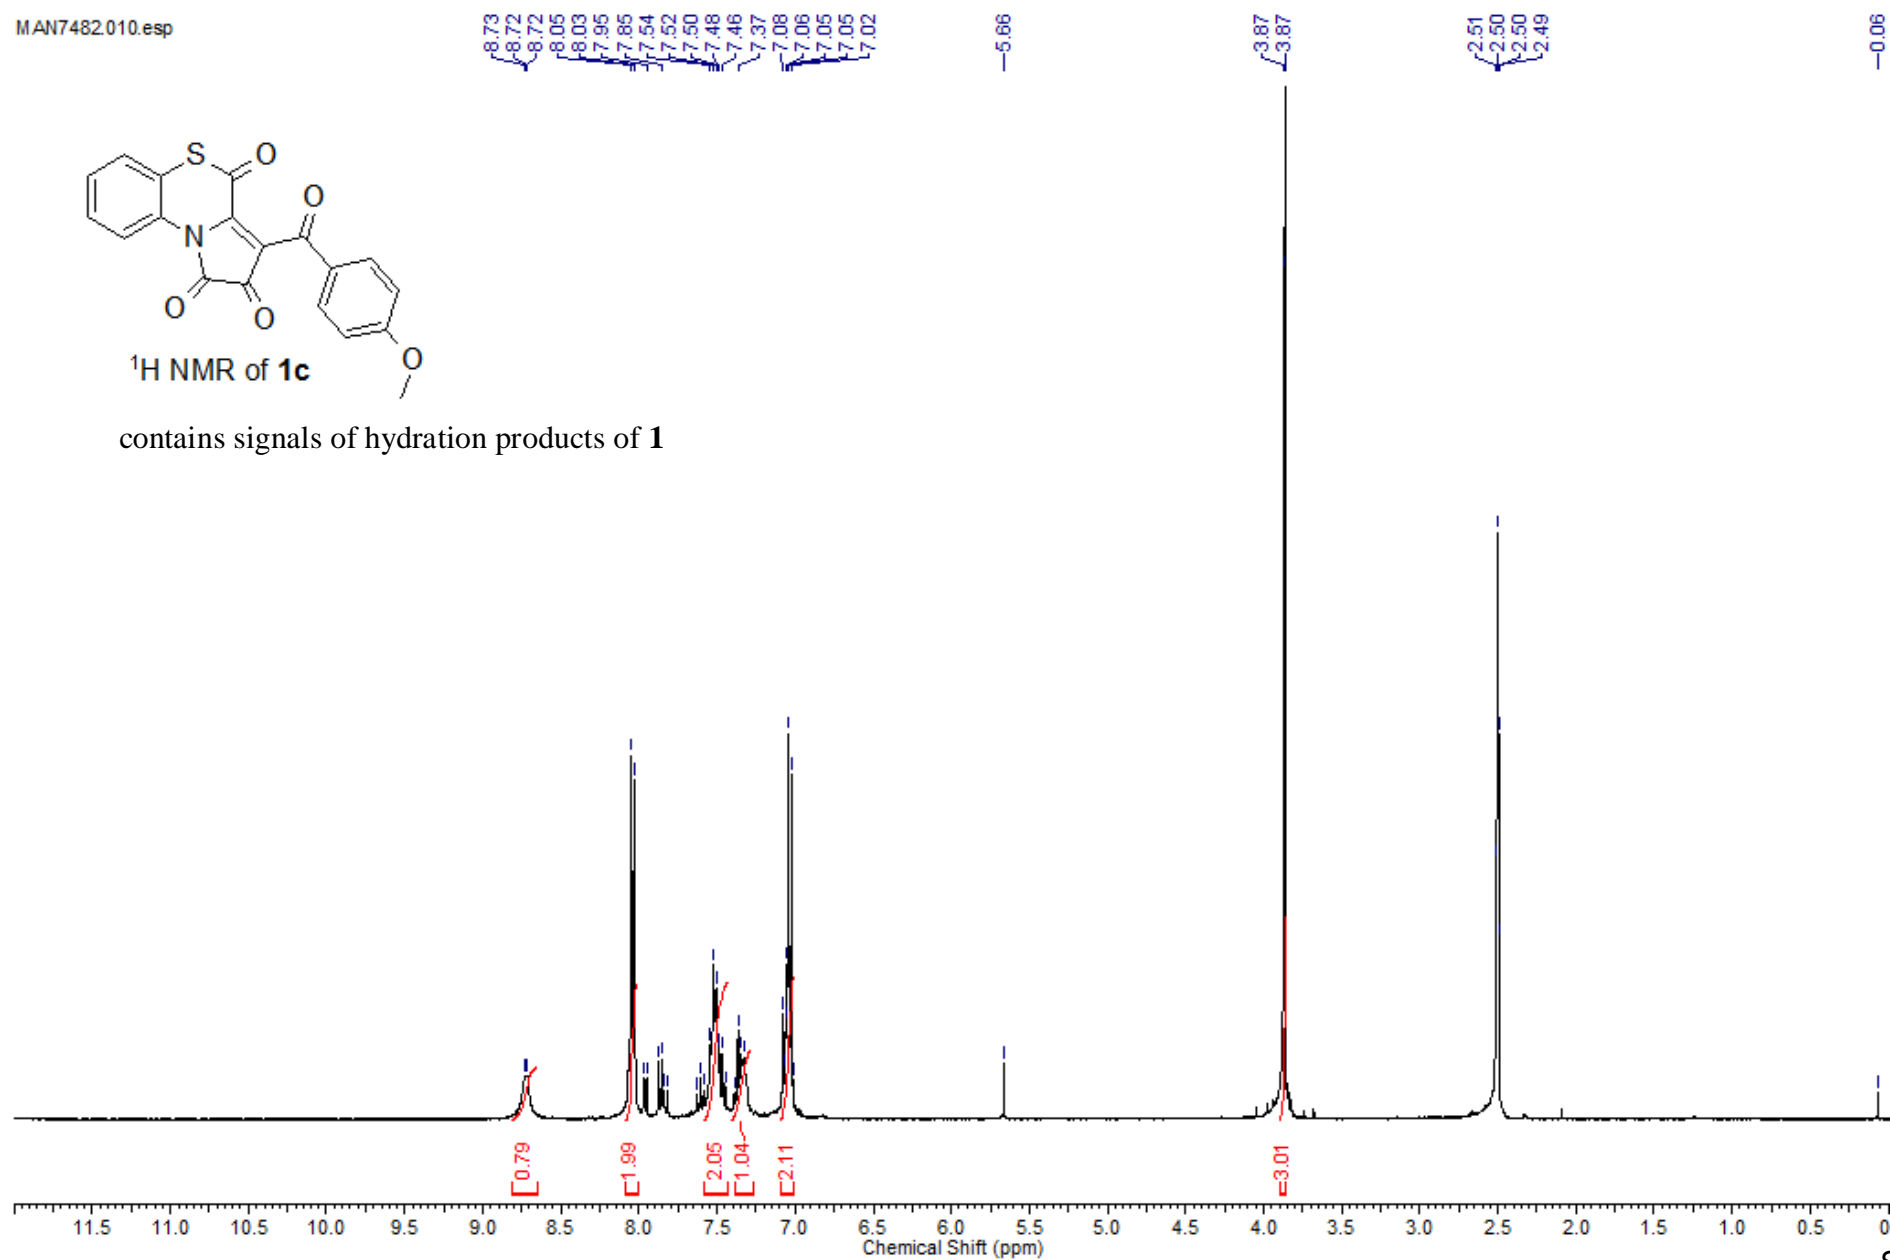

id23118\_220992\_DAY039\_13C.002.esp

186.65  
179.90  
171.39  
167.58  
165.52  
163.47  
156.72  
149.09  
136.18  
134.12  
132.36  
130.90  
128.55  
125.91  
118.86  
117.40  
112.70  
110.06  
105.07

78.37

57.53  
55.77

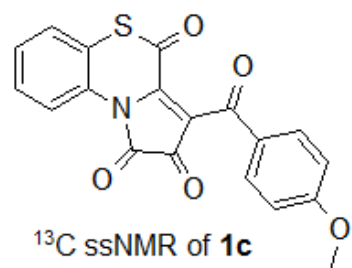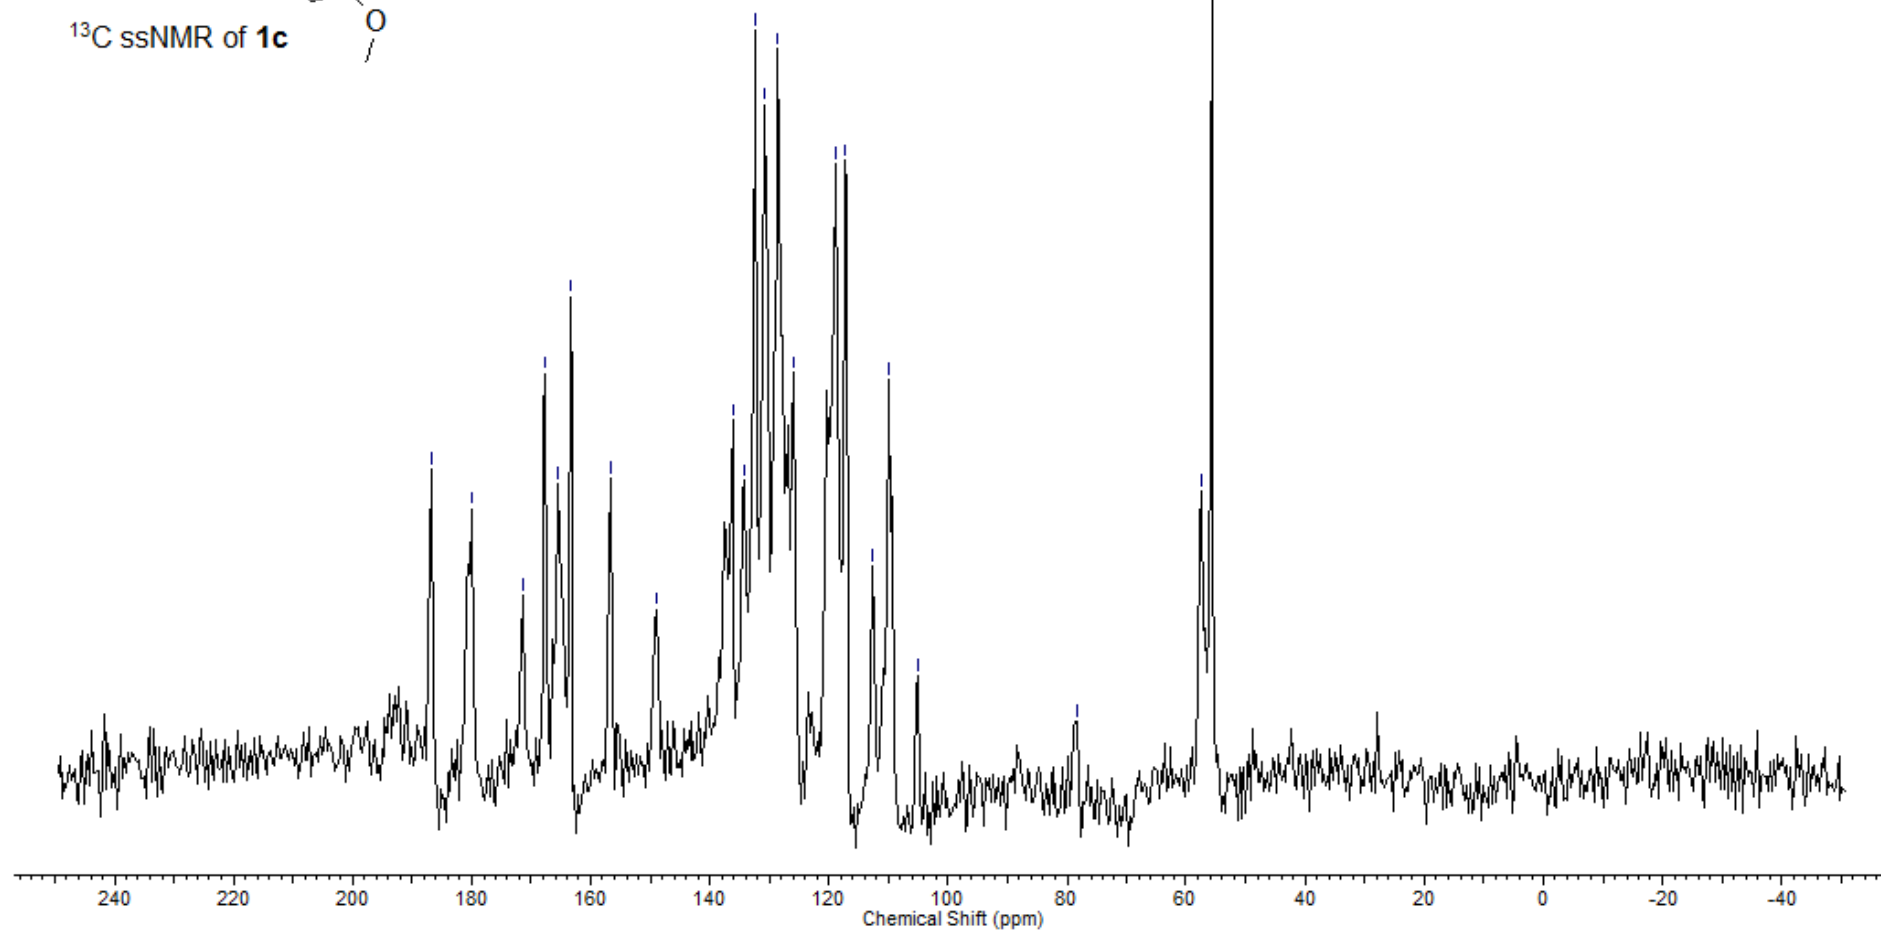

MAN7480.001.esp

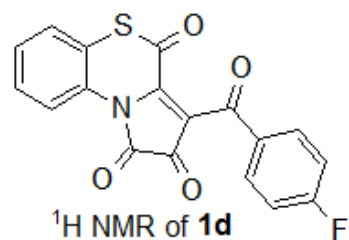

contains signals of hydration products of **1**

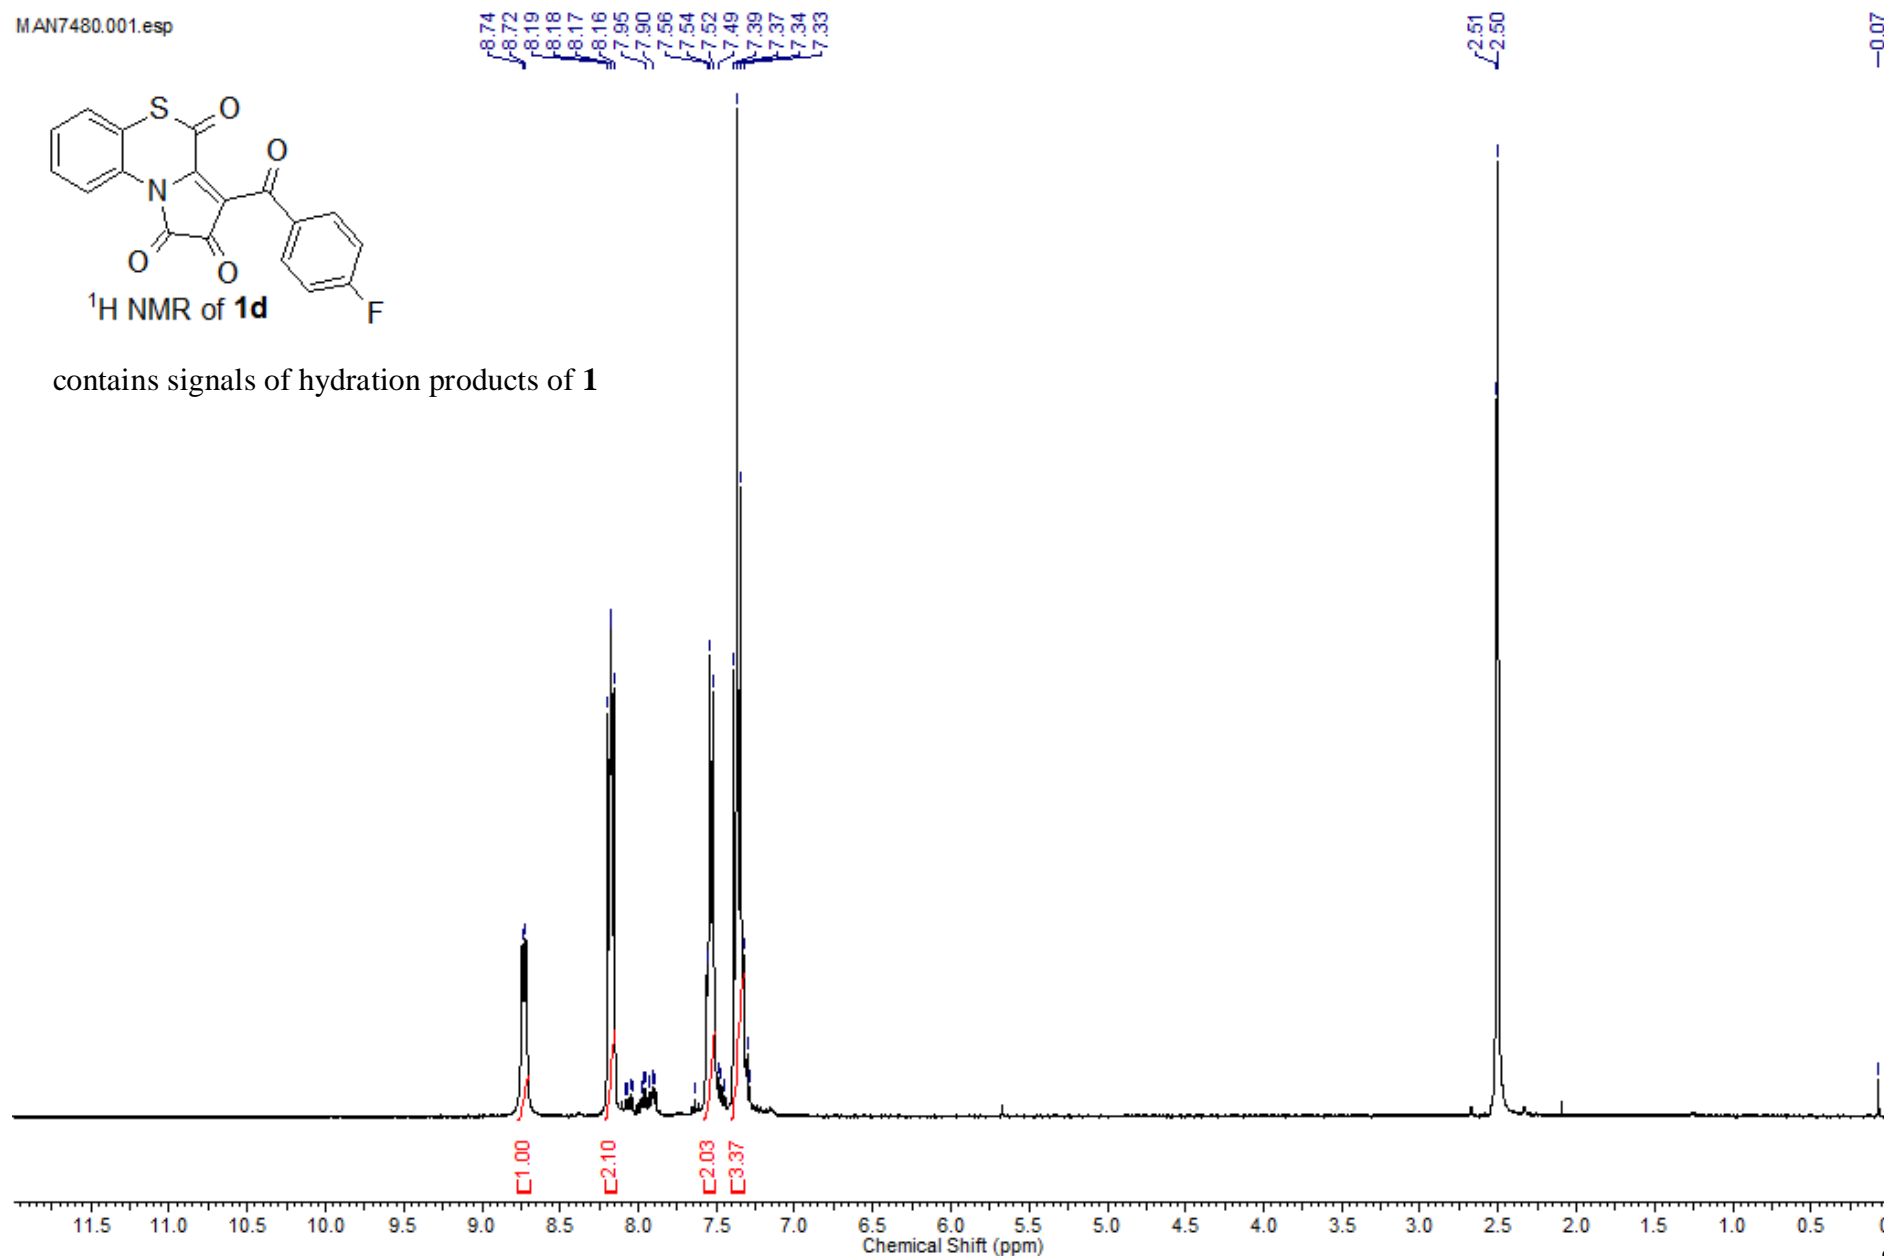





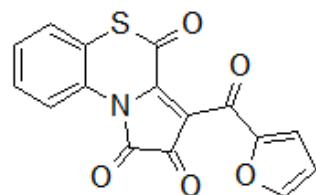 $^1\text{H}$  NMR of **1g**contains signals of hydration products of **1**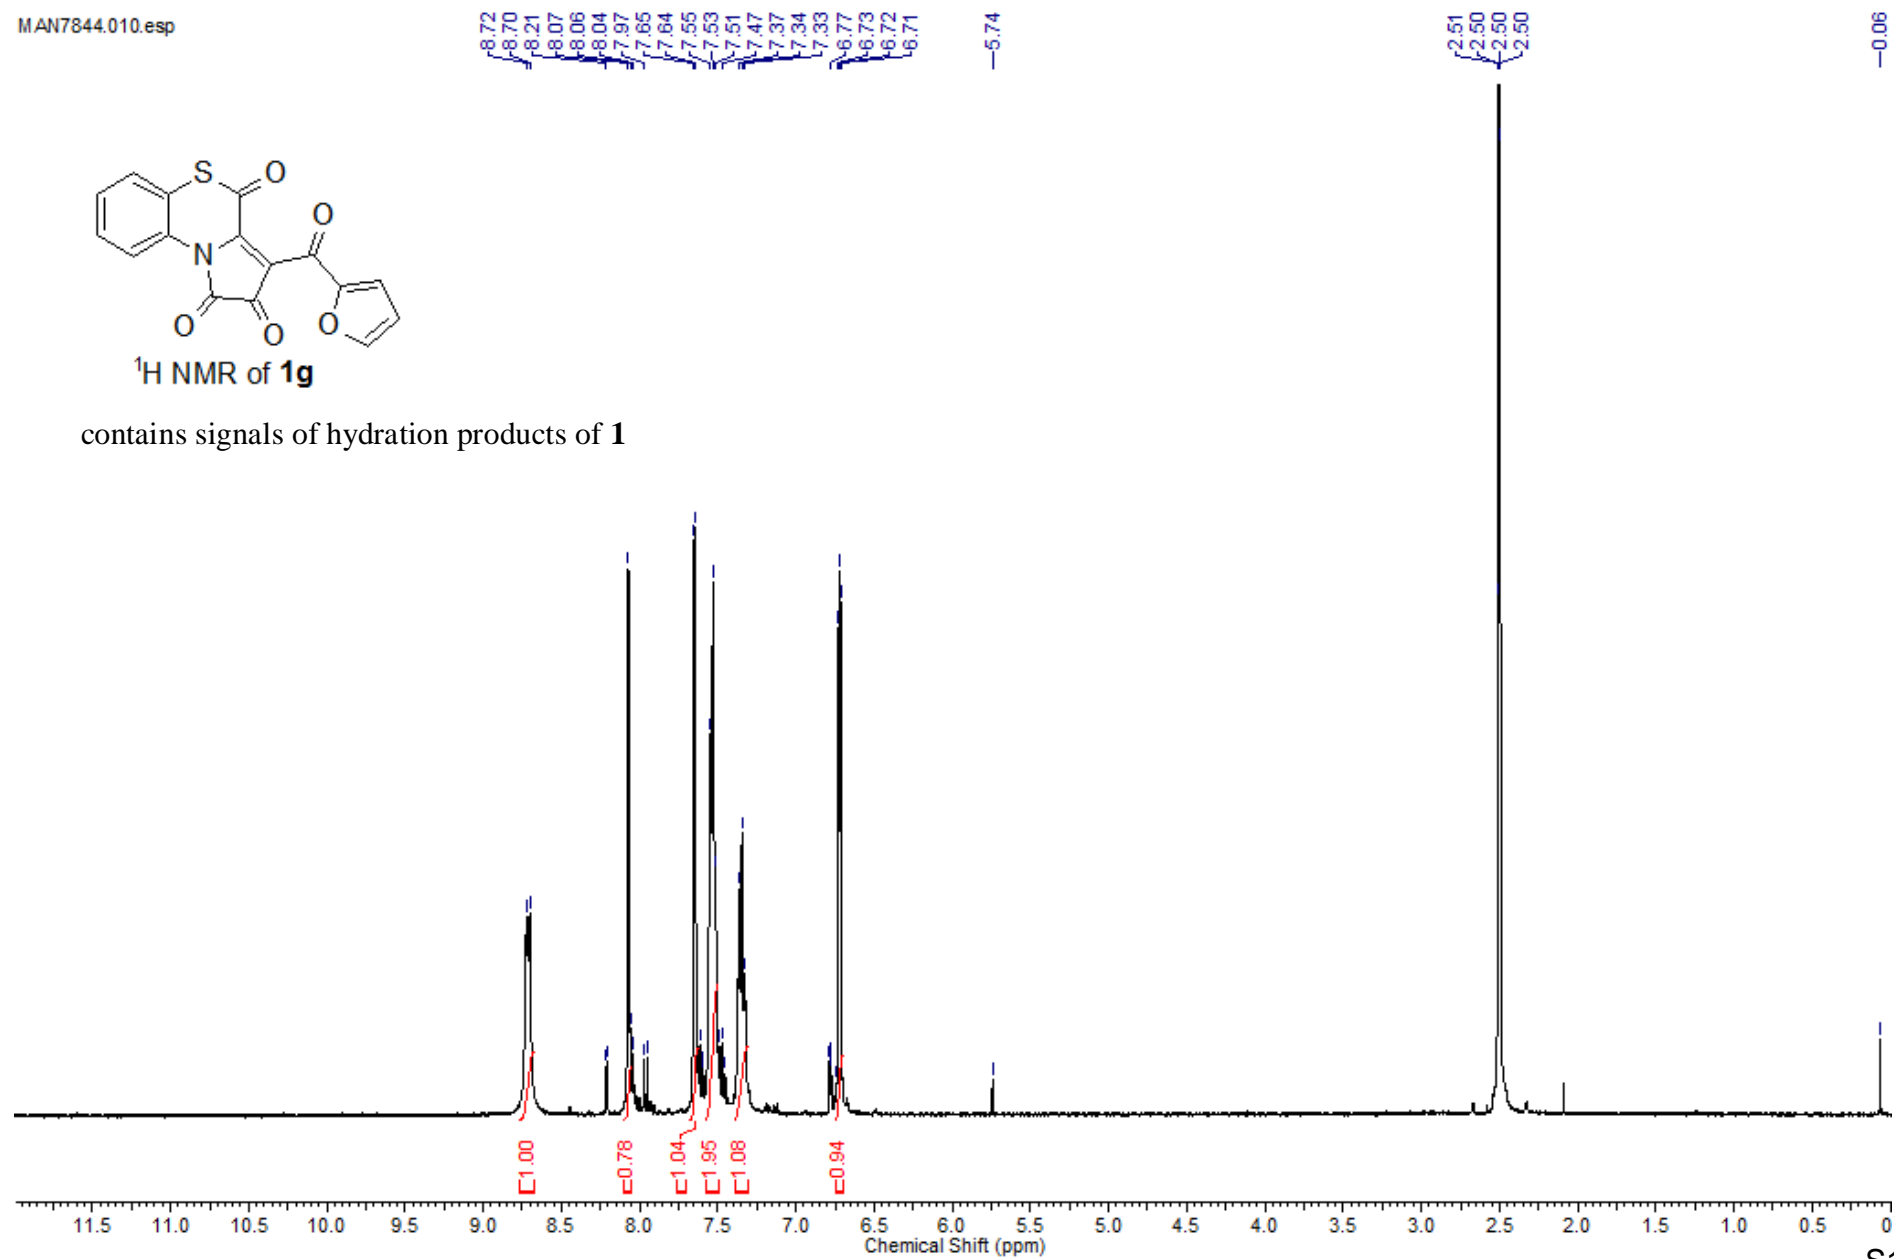

id29539\_244657\_MAN7844\_13C.002.esp

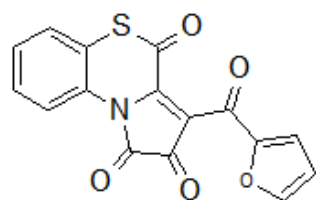

$^{13}\text{C}$  ssNMR of **1g**

182.41  
176.88  
176.09  
154.75  
152.82  
150.73  
132.86  
129.27  
127.84  
126.69  
119.94  
114.79  
107.79

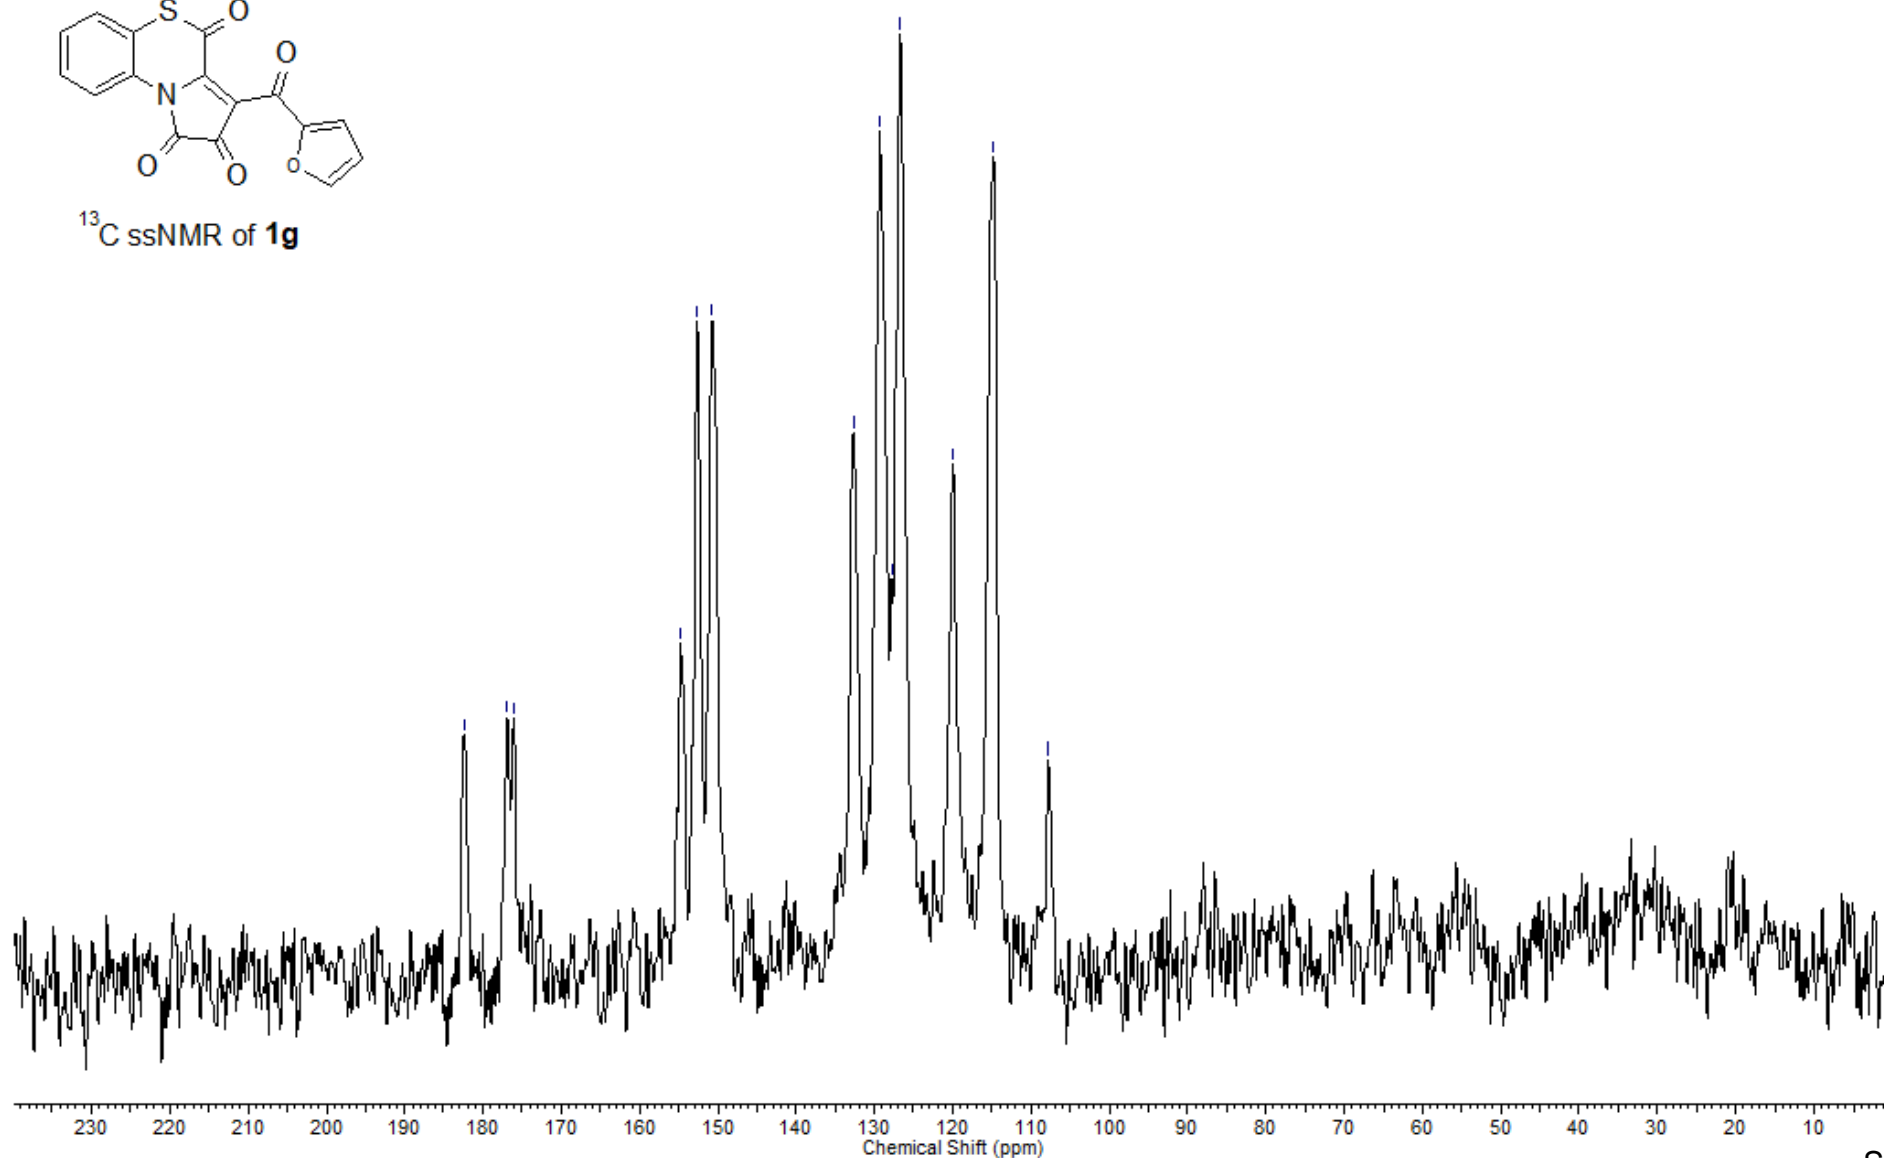

MAN7481.010.esp

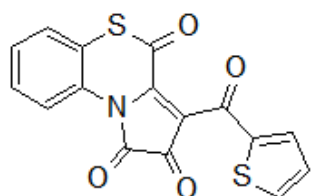

<sup>1</sup>H NMR of **1h**

contains signals of hydration products of **1**

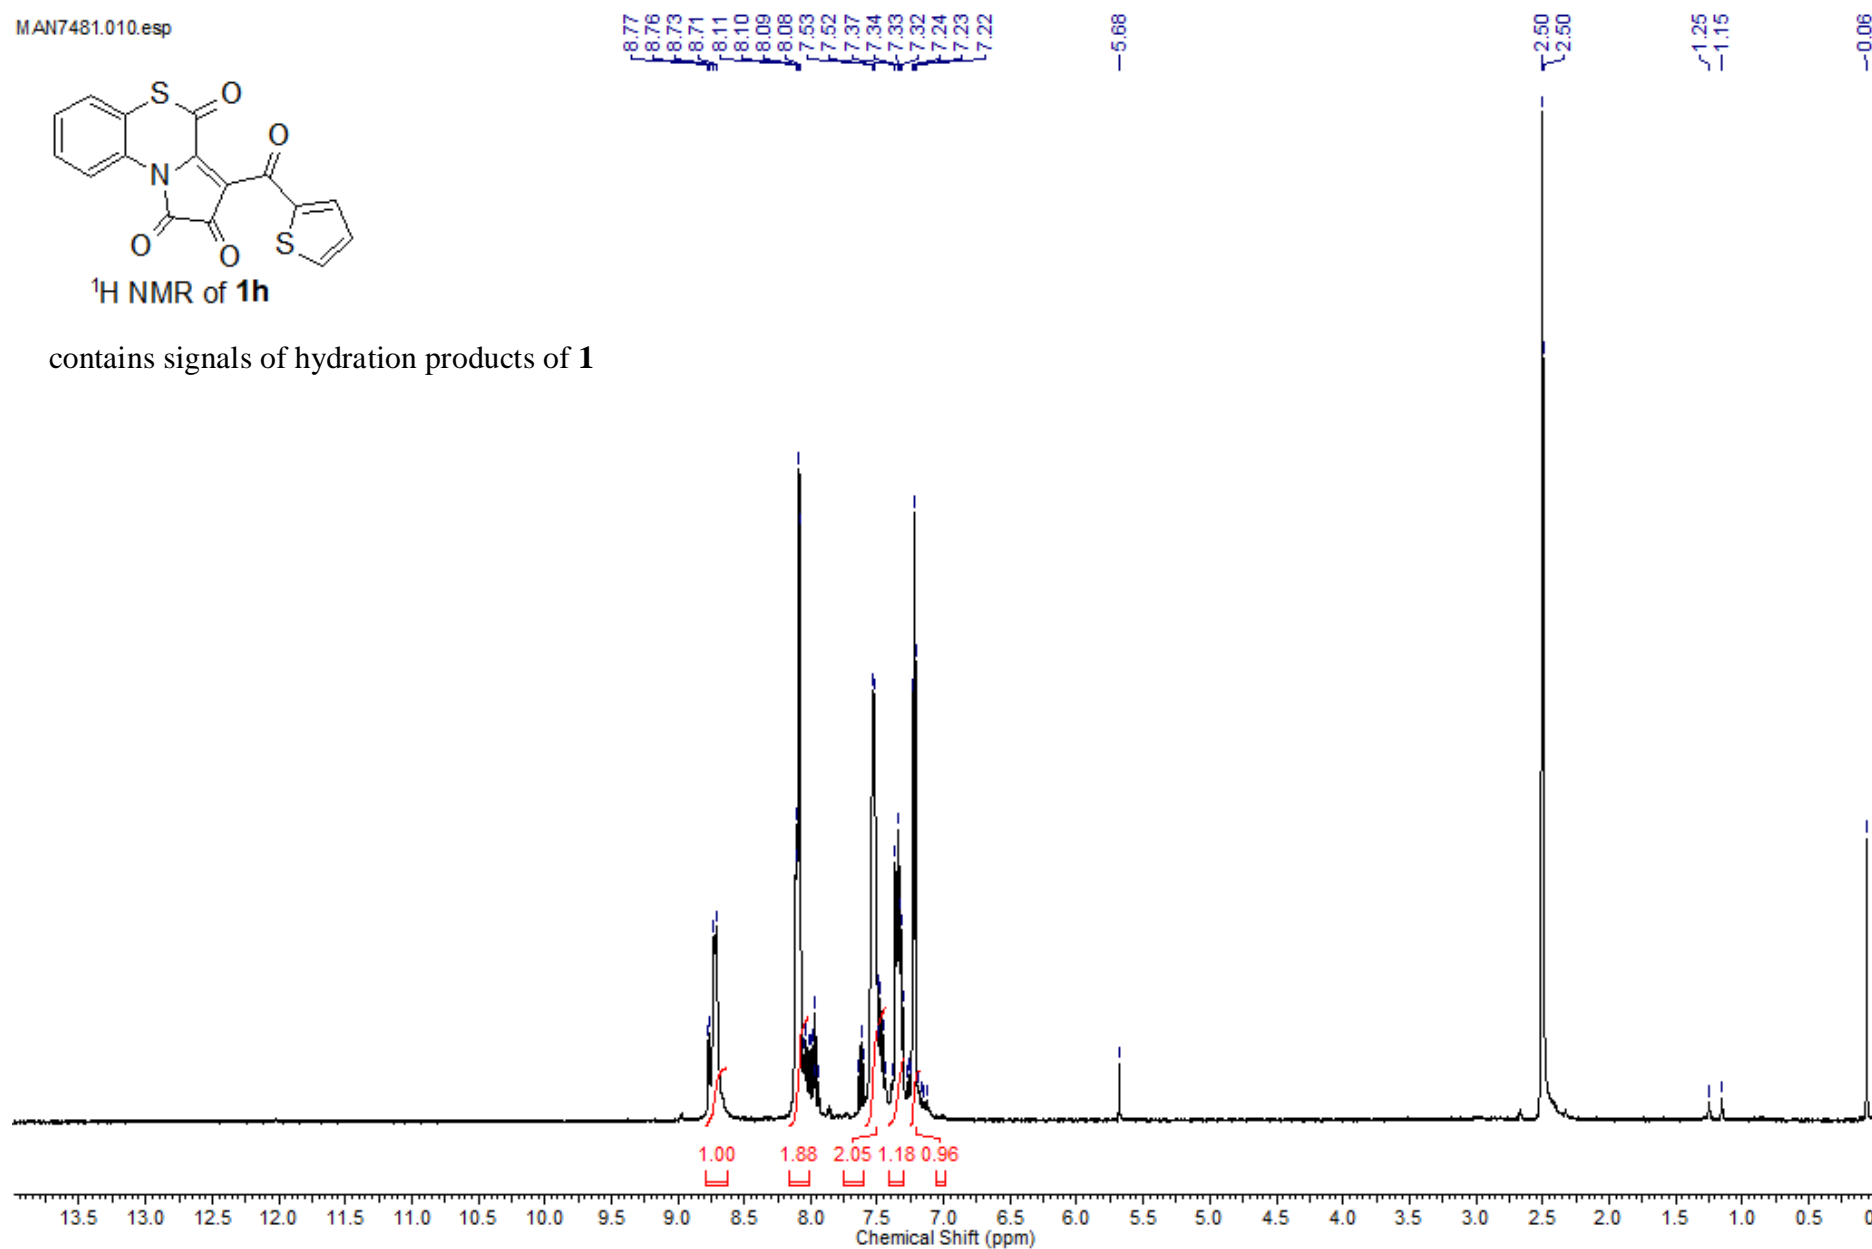

id23118\_220992\_DAY145\_13C.002.esp

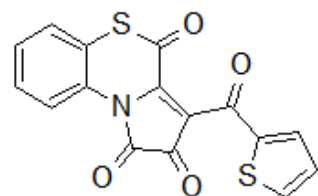

<sup>13</sup>C ssNMR of **1h**

181.08  
179.82

155.29  
148.32  
145.24  
141.08  
139.98  
137.88  
129.40  
128.58  
127.56  
127.22  
120.48  
117.42  
110.61

99.37

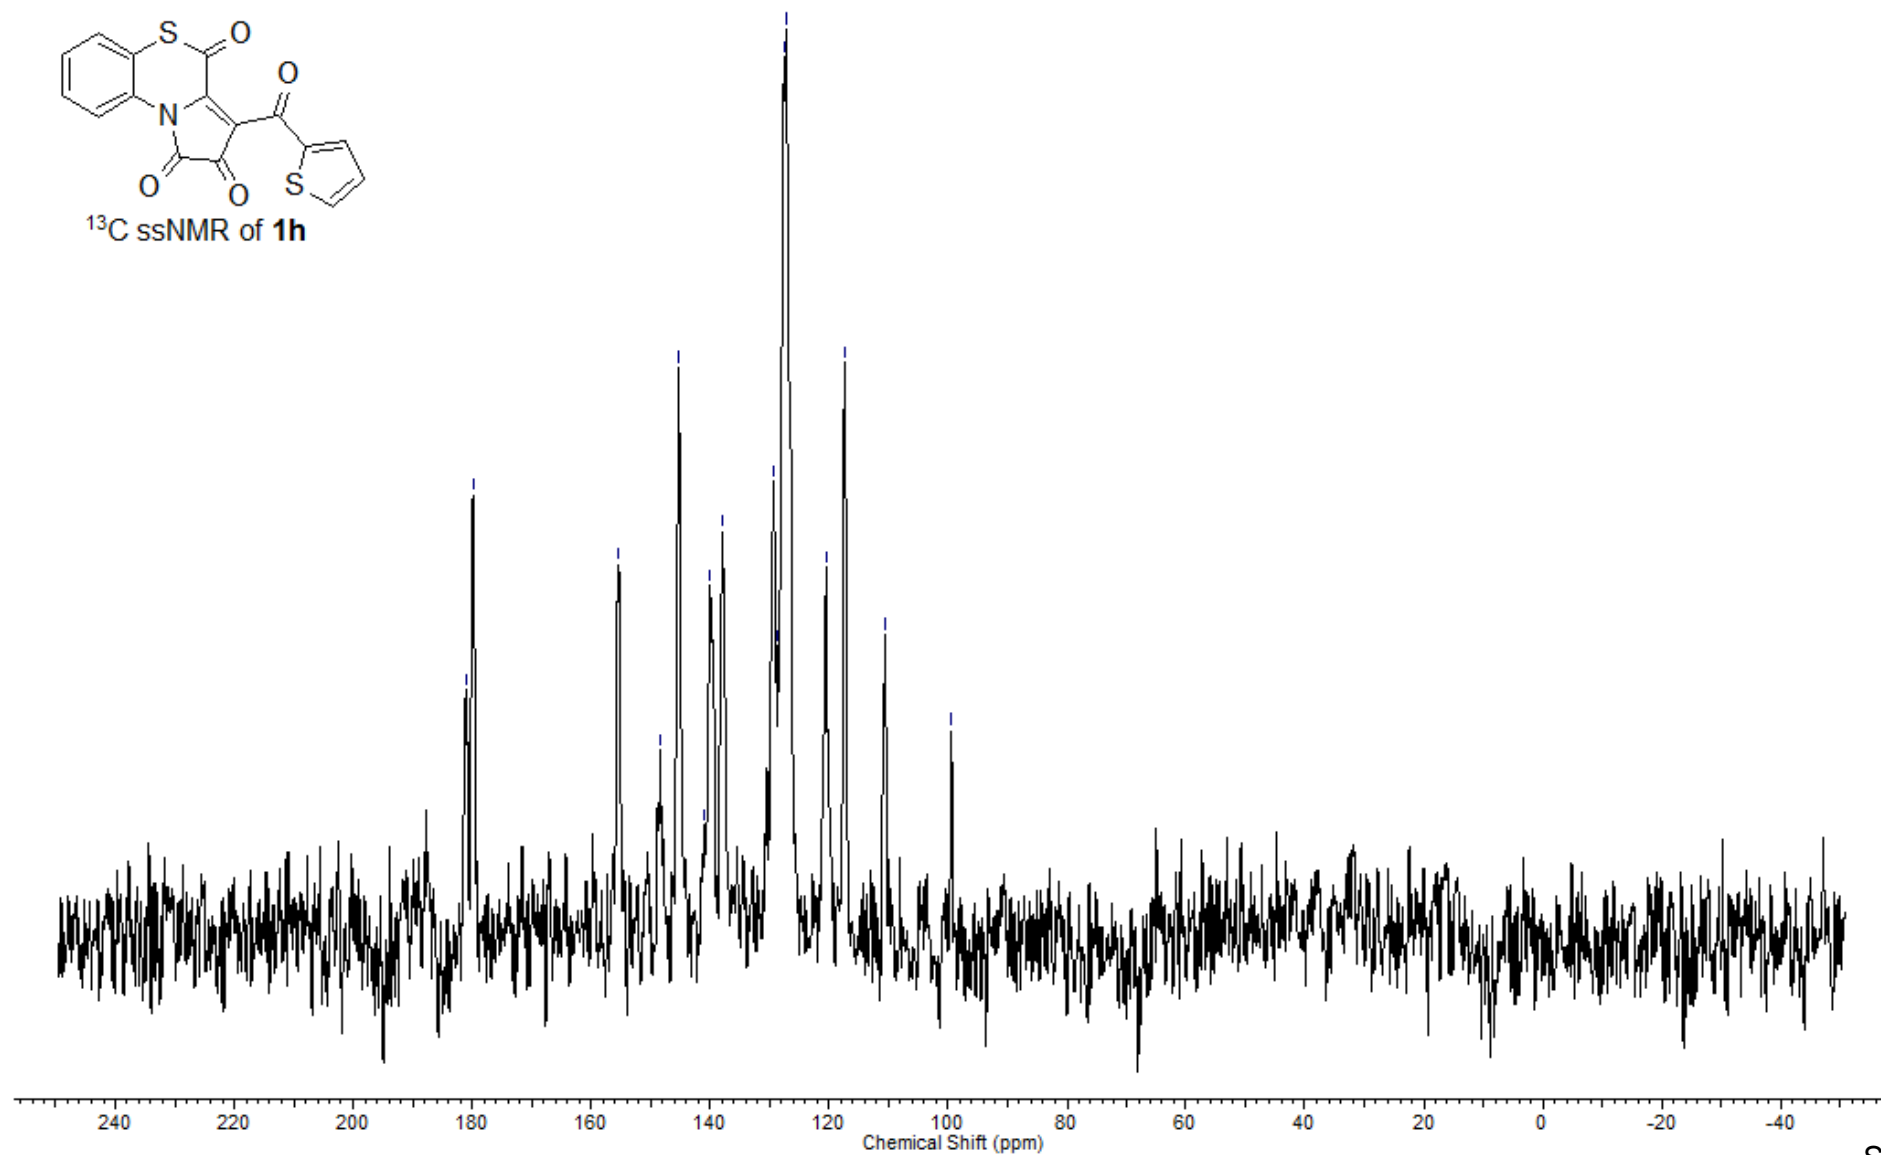

### Alkyl 3-aryl-2-hydroxy-1-oxopyrrolo[2,1-*b*][1,3]benzothiazole-3a(1*H*)-carboxylates **3**. General procedure.

A mixture of APBTT **1** (0.45 mmol) and alkanol **2** (5 mL) is stirred in a closed microreaction V-vial at the b.p. of the alkanol **2** (65 °C for MeOH **2a**, 85 °C for EtOH **2c** and iPrOH **2b**) for 1-3 h (1 h for MeOH **2a**, 2.5 h EtOH **2c**, 3 h for iPrOH **2b**). Then, the resulting solution is cooled to room temperature, and the solvent is evaporated under vacuum. The evaporated reaction mass is recrystallized from toluene (the compound **3ha** is recrystallized from toluene/xylene, ~2:1); the formed precipitate of compound **3** is filtered off, and washed with toluene.

#### Methyl 3-benzoyl-2-hydroxy-1-oxopyrrolo[2,1-*b*][1,3]benzothiazole-3a(1*H*)-carboxylate (**3aa**)

Yellow solid; yield (86 mg, 52%); mp 217–219 °C (toluene).

<sup>1</sup>H NMR (400 MHz, DMSO-*d*<sub>6</sub>): δ = 9.78 (br.s, 1H), 7.84 (m, 2H), 7.64 (m, 1H), 7.54–7.47 (m, 3H), 7.40 (m, 1H), 7.25–7.17 (m, 2H), 3.61 (s, 3H) ppm.

<sup>13</sup>C NMR (100 MHz, DMSO-*d*<sub>6</sub>): δ = 188.4, 167.4, 166.5, 152.2, 136.9, 134.5, 134.2, 133.0, 128.9 (2C), 128.2 (2C), 126.6, 125.7, 122.9, 118.3, 117.7, 78.2, 53.7 ppm.

IR (mineral oil): 3284, 3083, 1740, 1704, 1669 cm<sup>-1</sup>.

EA: Found: C, 62.31; H, 3.60; N, 3.90. Calc. for C<sub>19</sub>H<sub>13</sub>NO<sub>5</sub>S: C, 62.12; H, 3.57; N, 3.81.

#### Methyl 2-hydroxy-3-(4-methylbenzoyl)-1-oxopyrrolo[2,1-*b*][1,3]benzothiazole-3a(1*H*)-carboxylate (**3ba**)

Yellow solid; yield (112 mg, 65%); mp 219–221 °C (toluene).

<sup>1</sup>H NMR (400 MHz, DMSO-*d*<sub>6</sub>): δ = 9.26 (br.s, 1H), 7.75 (m, 2H), 7.48 (m, 1H), 7.39 (m, 1H), 7.33 (m, 2H), 7.24–7.16 (m, 2H), 3.59 (s, 3H), 2.40 (s, 3H) ppm.

<sup>13</sup>C NMR (100 MHz, DMSO-*d*<sub>6</sub>): δ = 188.0, 167.4, 166.6, 151.6, 143.5, 134.6, 134.3, 134.2, 129.2 (2C), 128.8 (2C), 126.5, 125.7, 122.9, 118.5, 117.7, 78.3, 53.6, 21.1 ppm.

IR (mineral oil): 3274, 3111, 1745, 1700, 1659 cm<sup>-1</sup>.

EA: Found: C, 63.17; H, 4.02; N, 3.81. Calc. for C<sub>20</sub>H<sub>15</sub>NO<sub>5</sub>S: C, 62.98; H, 3.96; N, 3.67.

#### Methyl 2-hydroxy-3-(4-methoxybenzoyl)-1-oxopyrrolo[2,1-*b*][1,3]benzothiazole-3a(1*H*)-carboxylate (**3ca**)

Yellow solid; yield (102 mg, 57%); mp 212–214 °C (toluene).

<sup>1</sup>H NMR (400 MHz, DMSO-*d*<sub>6</sub>): δ = 7.87 (m, 2H), 7.47 (m, 1H), 7.39 (m, 1H), 7.24–7.16 (m, 2H), 7.06 (m, 2H), 3.87 (s, 3H), 3.59 (s, 3H) ppm.

<sup>13</sup>C NMR (100 MHz, DMSO-*d*<sub>6</sub>): δ = 186.8, 167.4, 166.6, 163.4, 150.6, 134.7, 134.2, 131.6 (2C), 129.4, 126.5, 125.7, 122.9, 118.8, 117.7, 113.6 (2C), 78.3, 55.5, 53.6 ppm.

IR (mineral oil): 3184, 3089, 1755, 1732, 1666  $\text{cm}^{-1}$ .

EA: Found: C, 61.02; H, 3.99; N, 3.61. Calc. for  $\text{C}_{20}\text{H}_{15}\text{NO}_6\text{S}$ : C, 60.45; H, 3.80; N, 3.52.

**Methyl 3-(4-fluorobenzoyl)-2-hydroxy-1-oxopyrrolo[2,1-*b*][1,3]benzothiazole-3a(1*H*)-carboxylate (3da)**

Yellow solid; yield (80 mg, 46%); mp 225–227 °C (toluene).

$^1\text{H}$  NMR (400 MHz,  $\text{DMSO-}d_6$ ):  $\delta$  = 7.98 (m, 2H), 7.46 (m, 1H), 7.37 (m, 1H), 7.31 (m, 2H), 7.22–7.15 (m, 2H), 3.58 (s, 3H) ppm.

$^{13}\text{C}$  NMR (100 MHz,  $\text{DMSO-}d_6$ ):  $\delta$  = 186.8, 167.5, 166.5, 166.1, 163.6, 152.6, 134.5, 134.2, 133.6, 133.5, 132.1, 131.9, 126.5, 125.7, 122.9, 117.8, 117.7, 115.4, 115.2, 78.2, 53.6 ppm.

IR (mineral oil): 3274, 3106, 1740, 1712, 1651  $\text{cm}^{-1}$ .

EA: Found: C, 59.43; H, 3.25; N, 3.70. Calc. for  $\text{C}_{19}\text{H}_{12}\text{FNO}_5\text{S}$ : C, 59.22; H, 3.14; N, 3.63.

**Methyl 3-(4-chlorobenzoyl)-2-hydroxy-1-oxopyrrolo[2,1-*b*][1,3]benzothiazole-3a(1*H*)-carboxylate (3ea)**

Yellow solid; yield (85 mg, 47%); mp 229–231 °C (toluene).

$^1\text{H}$  NMR (400 MHz,  $\text{DMSO-}d_6$ ):  $\delta$  = 8.80 (br.s, 1H), 7.87 (m, 2H), 7.59 (m, 2H), 7.48 (m, 1H), 7.39 (m, 1H), 7.24–7.16 (m, 2H), 3.60 (s, 3H) ppm.

$^{13}\text{C}$  NMR (100 MHz,  $\text{DMSO-}d_6$ ):  $\delta$  = 187.0, 167.5, 166.5, 153.2, 137.7, 135.7, 134.4, 134.2, 130.8 (2C), 128.3 (2C), 126.5, 125.7, 122.9, 117.7, 117.6, 78.2, 53.6 ppm.

IR (mineral oil): 3232, 3071, 1751, 1725, 1660  $\text{cm}^{-1}$ .

EA: Found: C, 56.94; H, 3.07; N, 3.56. Calc. for  $\text{C}_{19}\text{H}_{12}\text{ClNO}_5\text{S}$ : C, 56.79; H, 3.01; N, 3.49.

**Methyl 3-(4-bromobenzoyl)-2-hydroxy-1-oxopyrrolo[2,1-*b*][1,3]benzothiazole-3a(1*H*)-carboxylate (3fa)**

Yellow solid; yield (93 mg, 46%); mp 229–231 °C (toluene).

$^1\text{H}$  NMR (400 MHz,  $\text{DMSO-}d_6$ ):  $\delta$  = 9.82 (br.s, 1H), 7.79 (m, 2H), 7.73 (m, 2H), 7.48 (m, 1H), 7.39 (m, 1H), 7.24–7.16 (m, 2H), 3.60 (s, 3H) ppm.

$^{13}\text{C}$  NMR (100 MHz,  $\text{DMSO-}d_6$ ):  $\delta$  = 187.2, 167.5, 166.5, 153.3, 136.1, 134.4, 134.2, 131.3 (2C), 130.9 (2C), 126.8, 126.5, 125.7, 122.9, 117.7, 117.6, 78.2, 53.6 ppm.

IR (mineral oil): 3239, 3075, 1750, 1724, 1659  $\text{cm}^{-1}$ .

EA: Found: C, 51.52; H, 2.99; N, 3.20. Calc. for  $\text{C}_{19}\text{H}_{12}\text{BrNO}_5\text{S}$ : C, 51.14; H, 2.71; N, 3.14.

**Methyl 3-(furan-2-ylcarbonyl)-2-hydroxy-1-oxopyrrolo[2,1-*b*][1,3]benzothiazole-3a(1*H*)-carboxylate (3ga)**

Yellow solid; yield (88 mg, 55%); mp 155–157 °C (toluene).

$^1\text{H}$  NMR (400 MHz,  $\text{DMSO-}d_6$ ):  $\delta$  = 10.34 (br.s, 1H), 8.04–7.78 (m, 2H), 7.46 (m, 2H), 7.19 (m, 2H), 6.76 (m, 1H), 3.59 (s, 3H) ppm.

$^{13}\text{C}$  NMR (100 MHz, DMSO- $d_6$ ):  $\delta$  = 173.2, 167.6, 166.7, 152.6, 151.1, 148.1, 134.6, 134.0, 126.6, 125.6, 122.8, 120.5, 118.1, 117.7, 112.4, 78.8, 53.7 ppm.

IR (mineral oil): 3179, 1730, 1705, 1665  $\text{cm}^{-1}$ .

EA: Found: C, 57.25; H, 3.32; N, 3.99. Calc. for  $\text{C}_{17}\text{H}_{11}\text{NO}_6\text{S}$ : C, 57.14; H, 3.10; N, 3.92.

### **Methyl 2-hydroxy-1-oxo-3-(thiophen-2-ylcarbonyl)pyrrolo[2,1-*b*][1,3]benzothiazole-3a(1*H*)-carboxylate (3ha)**

Yellow solid; yield (71 mg, 42%); mp 208–210 °C (toluene : xylene, 2 : 1).

$^1\text{H}$  NMR (400 MHz, DMSO- $d_6$ ):  $\delta$  = 10.63 (br.s, 1H), 8.35 (m, 1H), 8.04 (m, 1H), 7.46 (m, 1H), 7.38 (m, 1H), 7.28 (m, 1H), 7.22–7.16 (m, 2H), 3.59 (s, 3H) ppm.

$^{13}\text{C}$  NMR (100 MHz, DMSO- $d_6$ ):  $\delta$  = 178.9, 167.6, 166.8, 152.4, 143.2, 135.3, 134.6, 134.4, 134.1, 128.5, 126.6, 125.6, 122.9, 118.3, 117.7, 78.9, 53.7 ppm.

IR (mineral oil): 3269, 3085, 1739, 1707, 1663  $\text{cm}^{-1}$ .

EA: Found: C, 54.94; H, 3.00; N, 3.51. Calc. for  $\text{C}_{17}\text{H}_{11}\text{NO}_5\text{S}_2$ : C, 54.68; H, 2.97; N, 3.75.

### **Isopropyl 3-benzoyl-2-hydroxy-1-oxopyrrolo[2,1-*b*][1,3]benzothiazole-3a(1*H*)-carboxylate (3ab)**

Yellow solid; yield (80 mg, 45%); mp 193–195 °C (toluene).

$^1\text{H}$  NMR (400 MHz, DMSO- $d_6$ ):  $\delta$  = 7.85 (m, 2H), 7.65 (m, 1H), 7.54 (m, 2H), 7.48 (m, 1H), 7.40 (m, 1H), 7.25–7.16 (m, 2H), 4.80 (m, 1H), 0.99 (d,  $J$  = 8 Hz, 3H), 0.94 (d,  $J$  = 8 Hz, 3H) ppm.

$^{13}\text{C}$  NMR (100 MHz, DMSO- $d_6$ ):  $\delta$  = 188.6, 166.3, 166.0, 151.3, 136.8, 134.9, 134.3, 133.1, 128.9 (2C), 128.2 (2C), 126.4, 125.7, 122.9, 118.1, 117.6, 78.1, 70.3, 20.8 (2C) ppm.

IR (mineral oil): 3255, 3065, 1733, 1698, 1650  $\text{cm}^{-1}$ .

EA: Found: C, 63.96; H, 4.43; N, 3.62. Calc. for  $\text{C}_{21}\text{H}_{17}\text{NO}_5\text{S}$ : C, 63.79; H, 4.33; N, 3.54.

### **Isopropyl 2-hydroxy-3-(4-methylbenzoyl)-1-oxopyrrolo[2,1-*b*][1,3]benzothiazole-3a(1*H*)-carboxylate (3bb)**

Yellow solid; yield (63 mg, 34%); mp 192–194 °C (toluene).

$^1\text{H}$  NMR (400 MHz, DMSO- $d_6$ ):  $\delta$  = 7.76 (m, 2H), 7.47 (m, 1H), 7.39 (m, 1H), 7.34 (m, 2H), 7.24–7.16 (m, 2H), 4.79 (m, 1H), 2.40 (s, 3H), 0.98 (d,  $J$  = 8 Hz, 3H), 0.93 (d,  $J$  = 8 Hz, 3H) ppm.

$^{13}\text{C}$  NMR (100 MHz, DMSO- $d_6$ ):  $\delta$  = 188.8, 166.8, 166.8, 151.2, 144.3, 135.1, 134.9, 134.8, 129.7 (2C), 129.4 (2C), 127.0, 126.3, 123.5, 118.9, 118.2, 78.7, 70.9, 21.7, 21.4 (2C) ppm.

IR (mineral oil): 3258, 3070, 1733, 1700, 1651  $\text{cm}^{-1}$ .

EA: Found: C, 64.86; H, 4.72; N, 3.48. Calc. for  $\text{C}_{22}\text{H}_{19}\text{NO}_5\text{S}$ : C, 64.53; H, 4.68; N, 3.42.



**Isopropyl 2-hydroxy-3-(4-methoxybenzoyl)-1-oxopyrrolo[2,1-*b*][1,3]benzothiazole-3a(1*H*)-carboxylate (3cb)**

Yellow solid; yield (69 mg, 36%); mp 193–195 °C (toluene).

<sup>1</sup>H NMR (400 MHz, DMSO-*d*<sub>6</sub>): δ = 7.87 (m, 2H), 7.47 (m, 1H), 7.39 (m, 1H), 7.24–7.16 (m, 2H), 7.07 (m, 2H), 4.78 (1H), 3.87 (s, 3H), 0.98 (d, *J* = 4 Hz, 3H), 0.91 (d, *J* = 8 Hz, 3H) ppm.

<sup>13</sup>C NMR (100 MHz, DMSO-*d*<sub>6</sub>): δ = 187.0, 166.4, 166.0, 163.4, 149.7, 135.0, 134.4, 131.6 (2C), 129.4, 126.4, 125.7, 122.9, 118.5, 117.6, 113.7 (2C), 78.1, 70.3, 55.5, 20.8 (2C) ppm.

IR (mineral oil): 3227, 3075, 1742, 1694, 1644 cm<sup>-1</sup>.

EA: Found: C, 62.86; H, 4.72 N, 3.48. Calc. for C<sub>22</sub>H<sub>19</sub>NO<sub>6</sub>S: C, 62.11; H, 4.50; N, 3.29.

**Isopropyl 3-(4-chlorobenzoyl)-2-hydroxy-1-oxopyrrolo[2,1-*b*][1,3]benzothiazole-3a(1*H*)-carboxylate (3eb)**

Yellow solid; yield (58 mg, 30%); mp 202–204 °C (toluene).

<sup>1</sup>H NMR (400 MHz, DMSO-*d*<sub>6</sub>): δ = 9.37 (br.s, 1H), 7.87 (m, 2H), 7.60 (m, 2H), 7.47 (m, 1H), 7.39 (m, 1H), 7.24–7.16 (m, 2H), 4.83–4.75 (m, 1H), 0.97 (m, 6H) ppm.

<sup>13</sup>C NMR (100 MHz, DMSO-*d*<sub>6</sub>): δ = 187.3, 166.3, 166.0, 152.2, 137.8, 135.6, 134.8, 134.3, 130.8 (2C), 128.4 (2C), 126.4, 125.7, 122.9, 117.6, 117.5, 78.0, 70.3, 20.8 (2C) ppm.

IR (mineral oil): 3248, 3074, 1735, 1703, 1657 cm<sup>-1</sup>.

EA: Found: C, 58.83; H, 3.79; N, 3.30. Calc. for C<sub>21</sub>H<sub>16</sub>ClNO<sub>5</sub>S: C, 58.68; H, 3.75; N, 3.26.

**Isopropyl 3-(4-bromobenzoyl)-2-hydroxy-1-oxopyrrolo[2,1-*b*][1,3]benzothiazole-3a(1*H*)-carboxylate (3fb)**

Yellow solid; yield (178 mg, 87%); mp 186–188 °C (toluene).

<sup>1</sup>H NMR (400 MHz, DMSO-*d*<sub>6</sub>): δ = 8.20 (br.s, 1H), 7.80–7.73 (m, 4H), 7.47 (m, 1H), 7.39 (m, 1H), 7.24–7.16 (m, 2H), 4.80 (m, 1H), 1.00 (d, *J* = 4 Hz, 3H), 0.96 (d, *J* = 4 Hz, 3H) ppm.

<sup>13</sup>C NMR (100 MHz, DMSO-*d*<sub>6</sub>): δ = (ppm) 187.5, 166.3, 166.1, 152.4, 136.0, 134.8, 134.3, 131.3 (2C), 130.9 (2C), 126.9, 126.4, 125.6, 122.9, 117.6, 117.4, 78.1, 70.3, 20.8 (2C) ppm.

IR (mineral oil): 3202, 3063, 1737, 1712, 1659 cm<sup>-1</sup>.

EA: Found: C, 53.41; H, 3.68; N, 3.07. Calc. for C<sub>21</sub>H<sub>16</sub>BrNO<sub>5</sub>S: C, 53.18; H, 3.40; N, 2.95.

**Isopropyl 2-hydroxy-1-oxo-3-(thiophen-2-ylcarbonyl)pyrrolo[2,1-*b*][1,3]benzothiazole-3a(1*H*)-carboxylate (3hb)**

Yellow solid; yield (116 mg, 64%); mp 170–172 °C (toluene, xylene).

<sup>1</sup>H NMR (400 MHz, DMSO-*d*<sub>6</sub>): δ = 9.96 (br.s, 1H), 8.23 (m, 1H), 8.06 (m, 1H), 7.46 (m, 1H), 7.38 (m, 1H), 7.28 (m, 1H), 7.23–7.15 (m, 2H), 4.77 (m, 1H), 0.99 (d, *J* = 4 Hz, 3H), 0.93 (d, *J* = 4 Hz, 3H) ppm.

$^{13}\text{C}$  NMR (100 MHz, DMSO- $d_6$ ):  $\delta$  = 179.5, 166.5, 166.0, 151.0, 143.2, 135.5, 134.9, 134.7, 134.3, 128.5, 126.4, 125.6, 122.8, 118.0, 117.6, 78.5, 70.3, 20.8, 20.7 ppm.

IR (mineral oil): 3245, 3098, 1733, 1699, 1672  $\text{cm}^{-1}$ .

EA: Found: C, 57.12; H, 3.89; N, 3.61. Calc. for  $\text{C}_{19}\text{H}_{15}\text{NO}_5\text{S}_2$ : C, 56.85; H, 3.77; N, 3.49.

**Ethyl 3-benzoyl-2-hydroxy-1-oxopyrrolo[2,1-*b*][1,3]benzothiazole-3a(1*H*)-carboxylate (3ac)**

Yellow solid; yield (70 mg, 41%); mp 207–209 °C (toluene).

$^1\text{H}$  NMR (400 MHz, DMSO- $d_6$ ):  $\delta$  = 7.84 (m, 2H), 7.64 (m, 1H), 7.53 (m, 2H), 7.47 (m, 1H), 7.40 (m, 1H), 7.24–7.16 (m, 2H), 4.05 (m, 2H), 0.96 (t,  $J$  = 8 Hz, 3H) ppm.

$^{13}\text{C}$  NMR (100 MHz, DMSO- $d_6$ ):  $\delta$  = 188.7, 166.8, 166.5, 151.8, 136.9, 134.8, 134.3, 133.2, 129.1 (2C), 128.3 (2C), 126.6, 125.8, 123.1, 118.2, 117.8, 78.2, 62.6, 13.5 ppm.

IR (mineral oil): 3249, 3068, 1738, 1704, 1661  $\text{cm}^{-1}$ .

EA: Found: C, 63.31; H, 4.18; N, 3.83. Calc. for  $\text{C}_{20}\text{H}_{15}\text{NO}_5\text{S}$ : C, 62.98; H, 3.96; N, 3.67.

MAN7267.011.esp

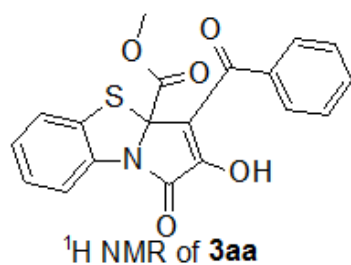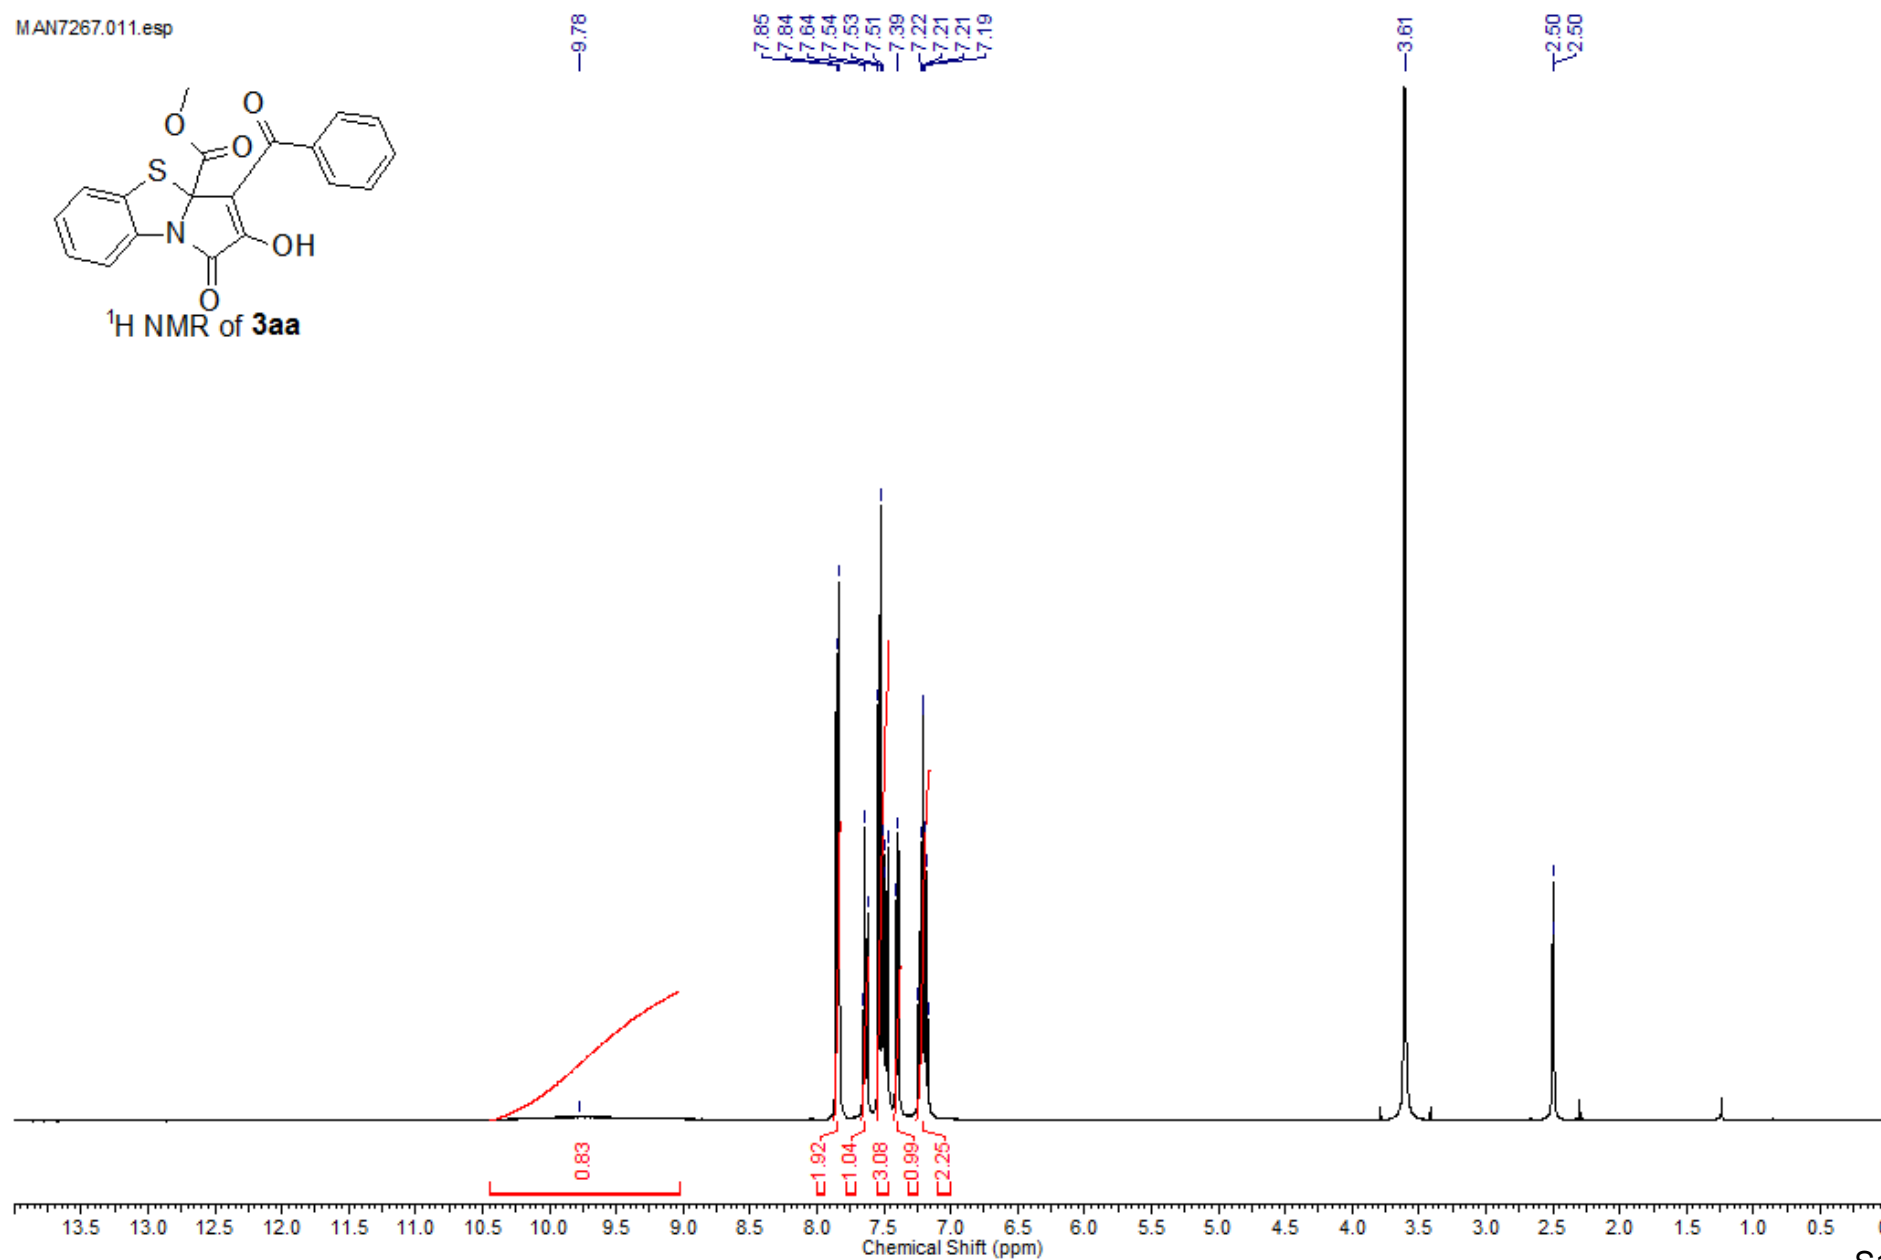

MAN7267.012.esp

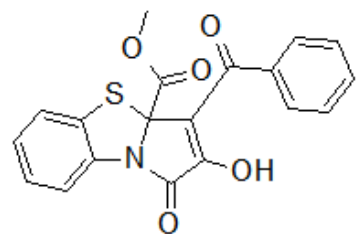

<sup>13</sup>C NMR of 3aa

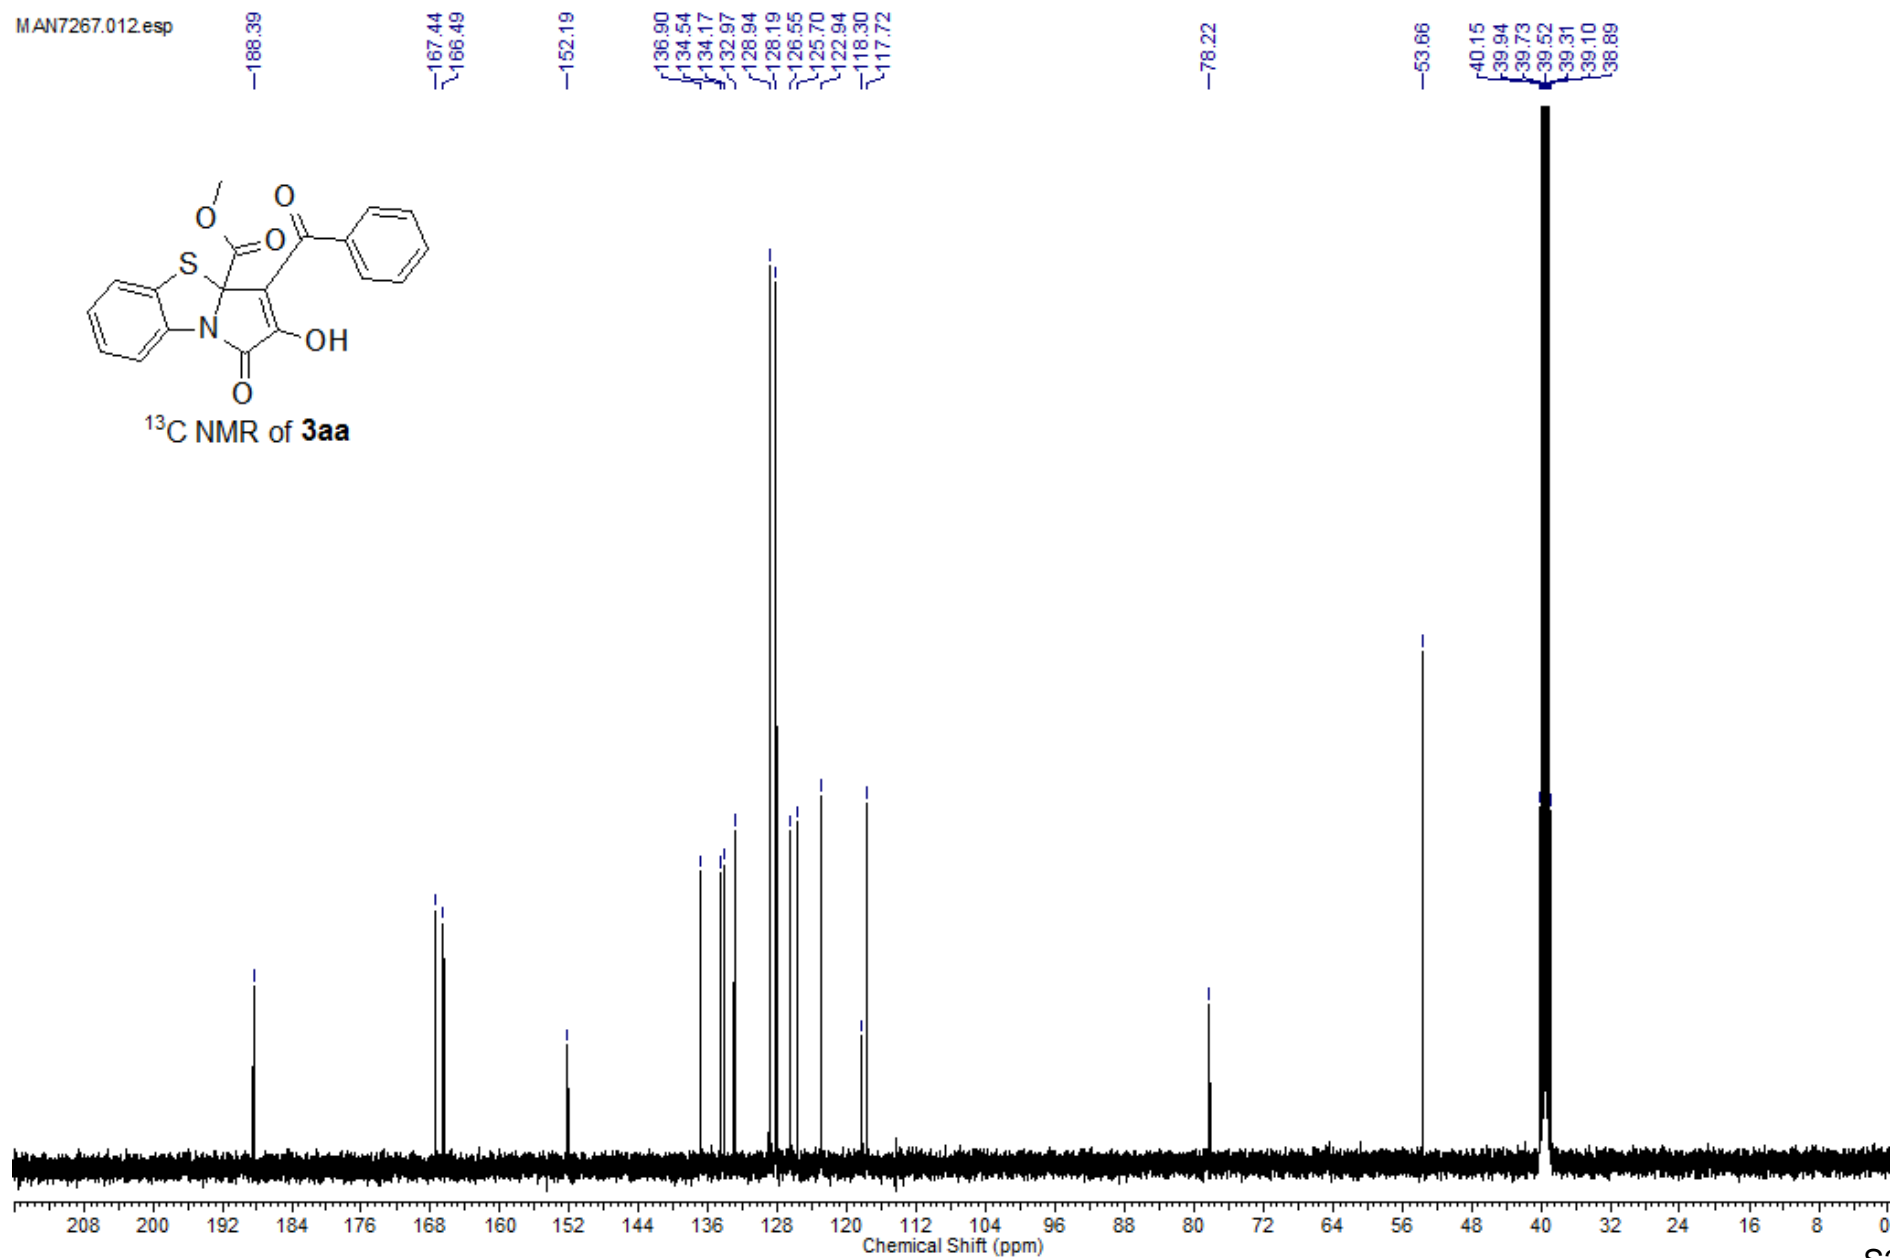

MAN7267.013.esp

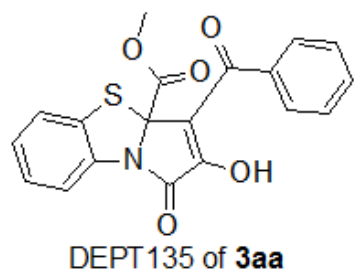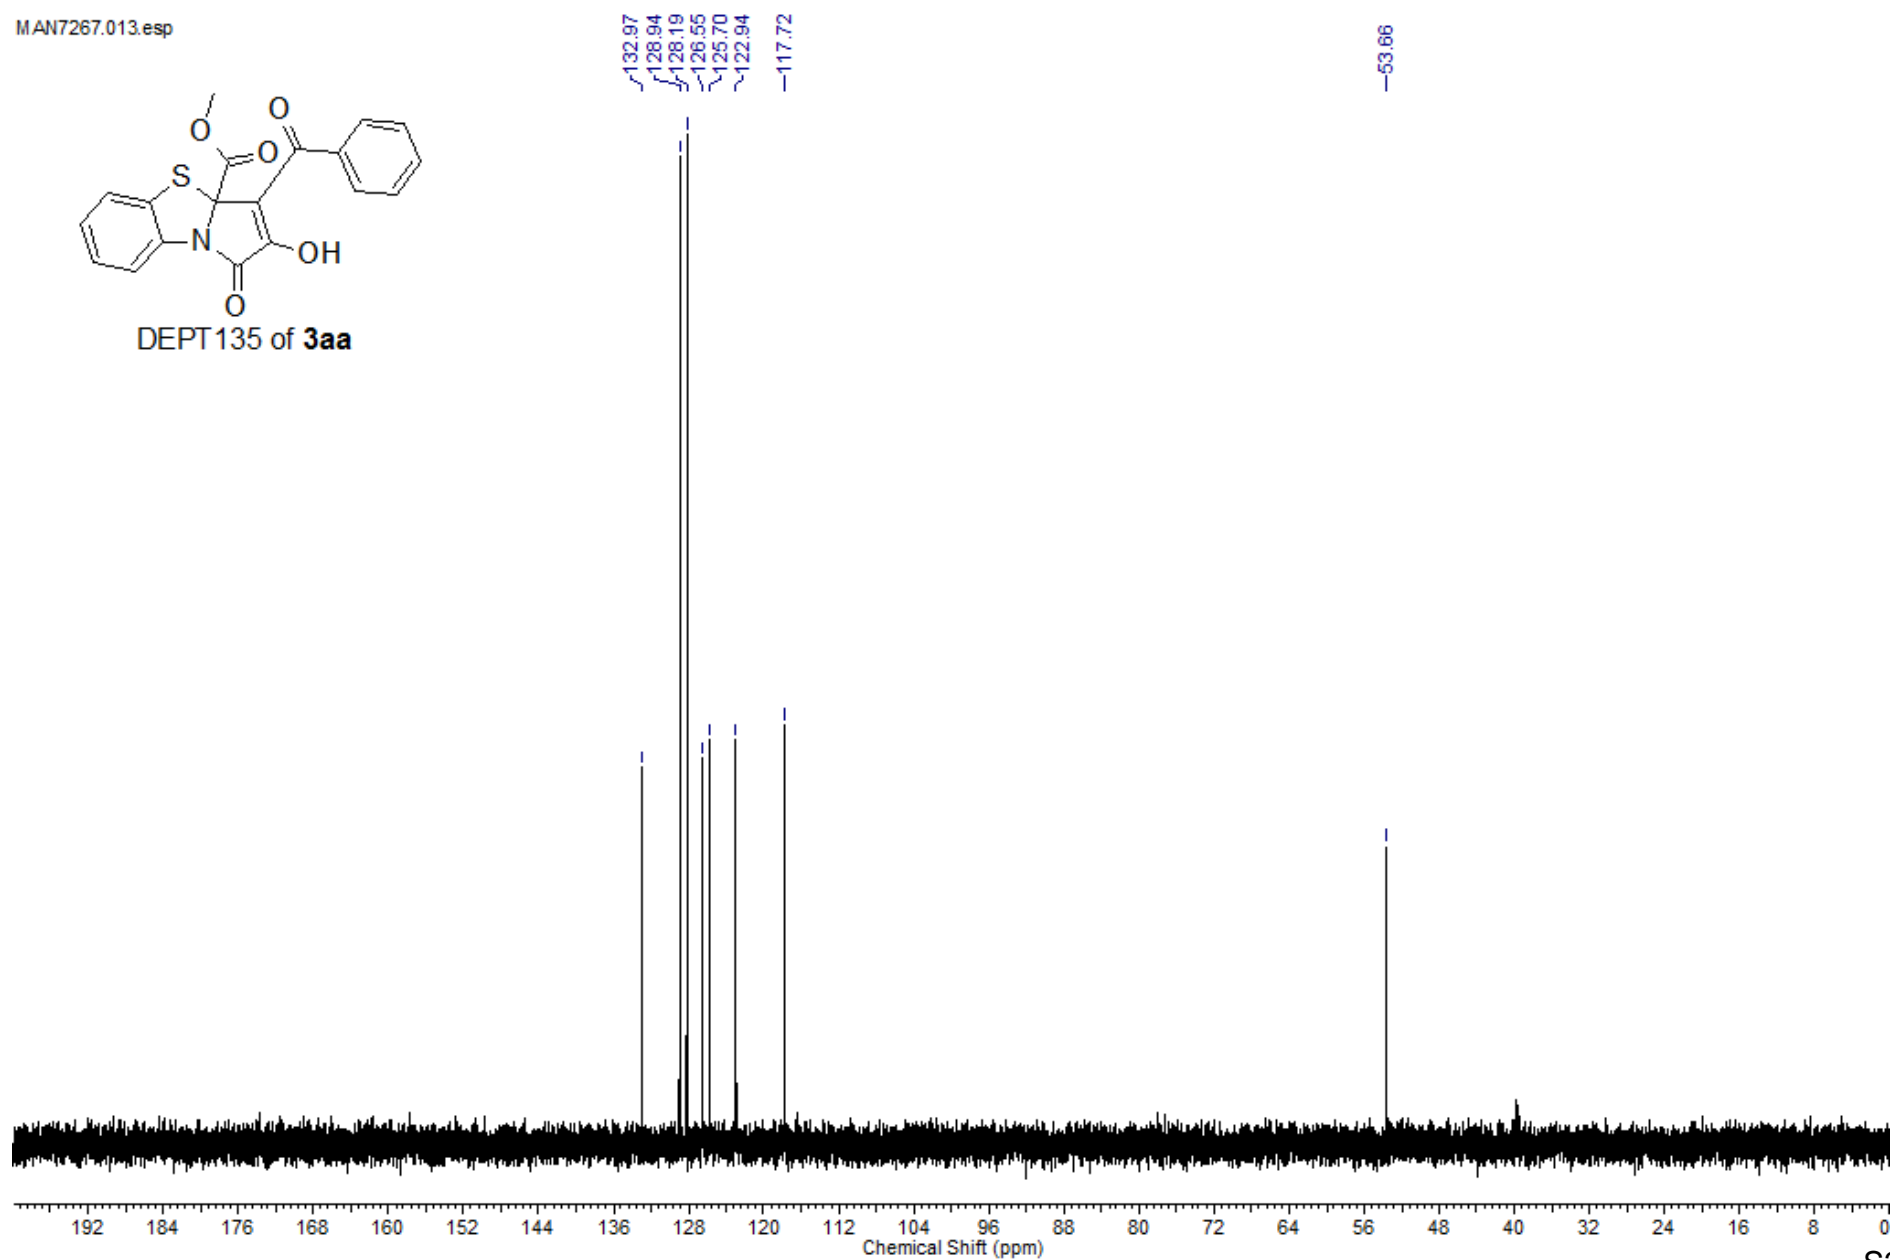

MAN7325.001.esp

-9.26

7.77  
7.75  
7.49  
7.48  
7.47  
7.38  
7.34  
7.32  
7.22  
7.21  
7.20  
7.20

3.59

2.50  
2.50  
2.49  
2.40

-1.24

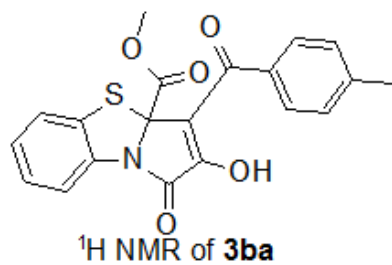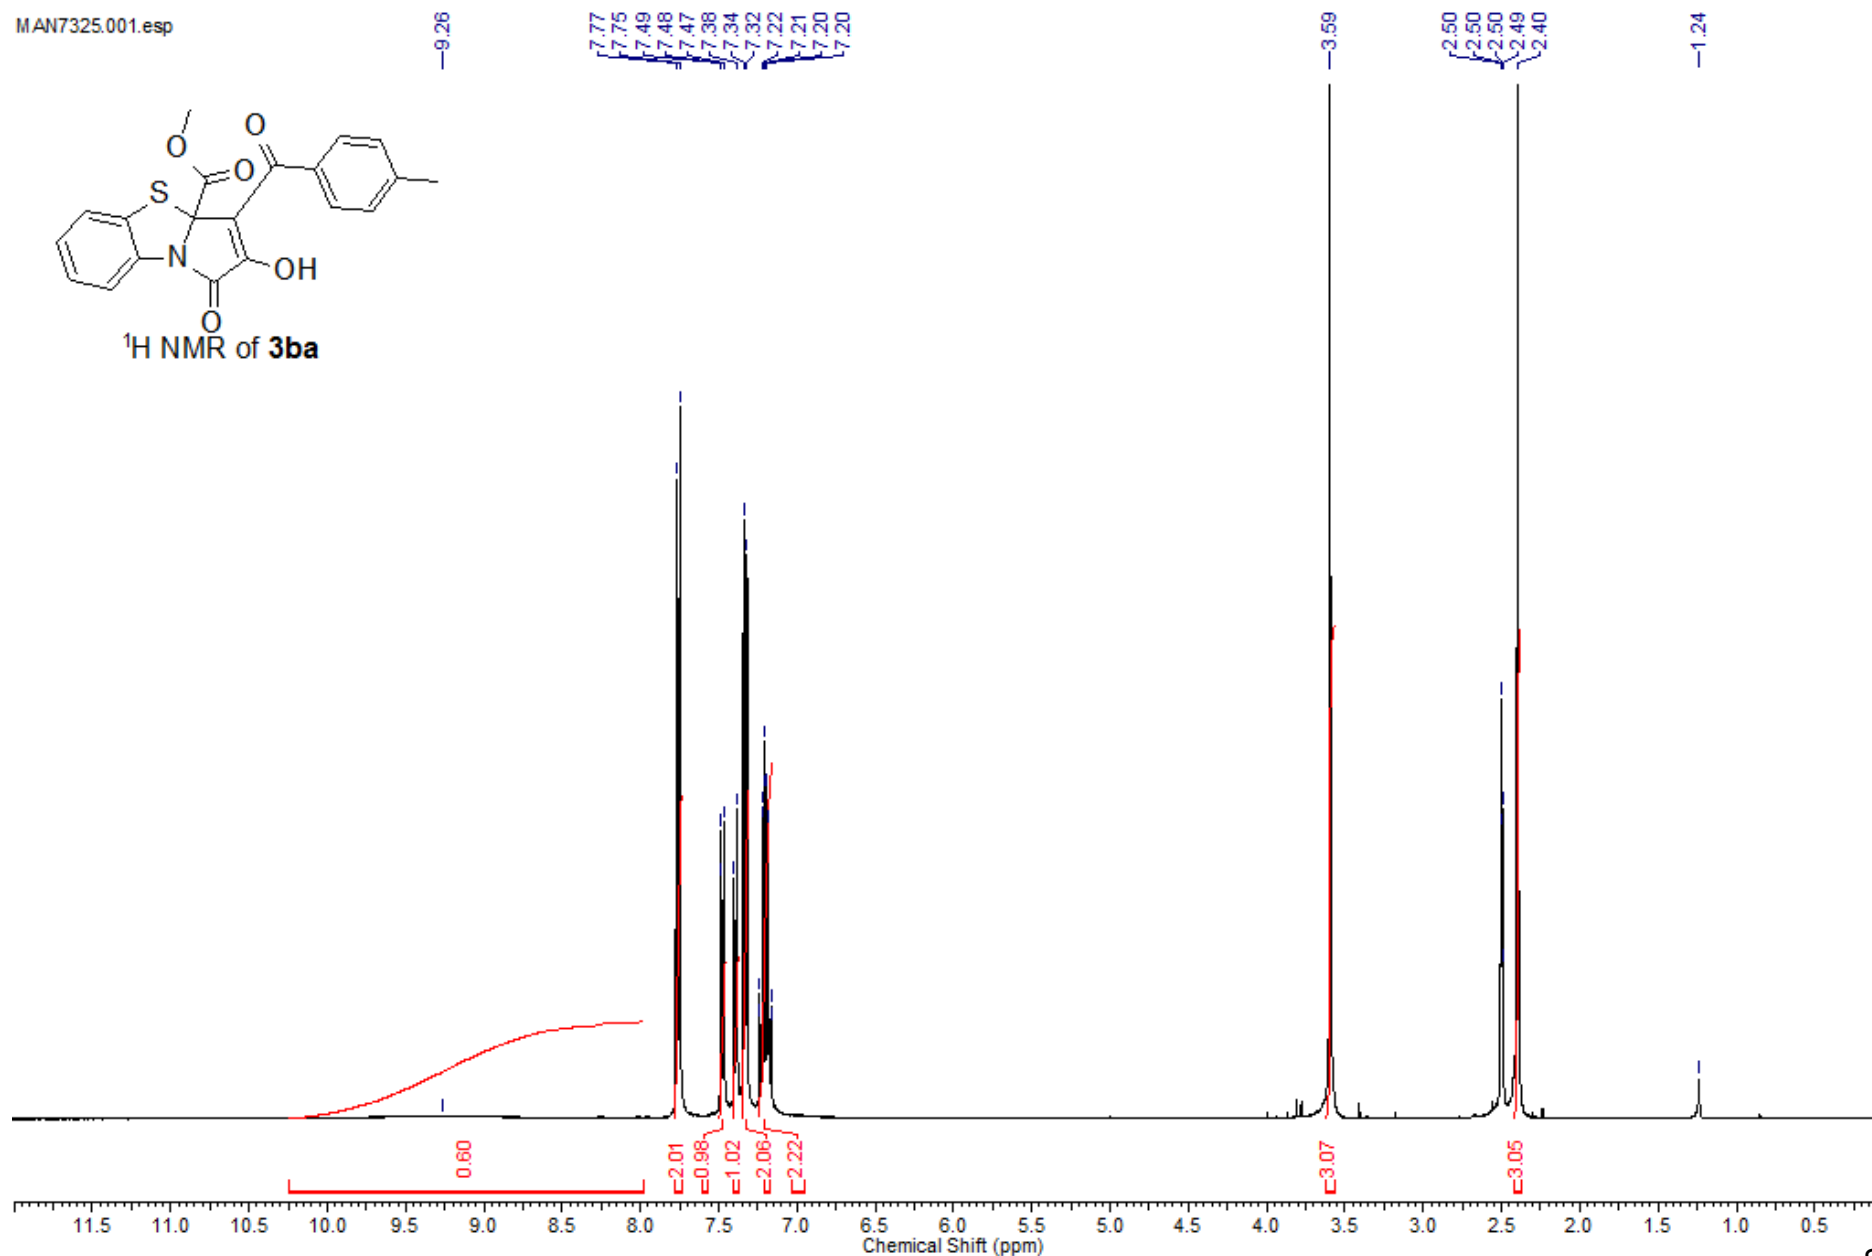

MAN7325.002.esp

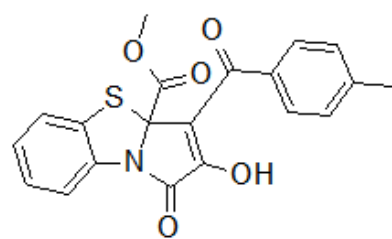

<sup>13</sup>C NMR of 3ba

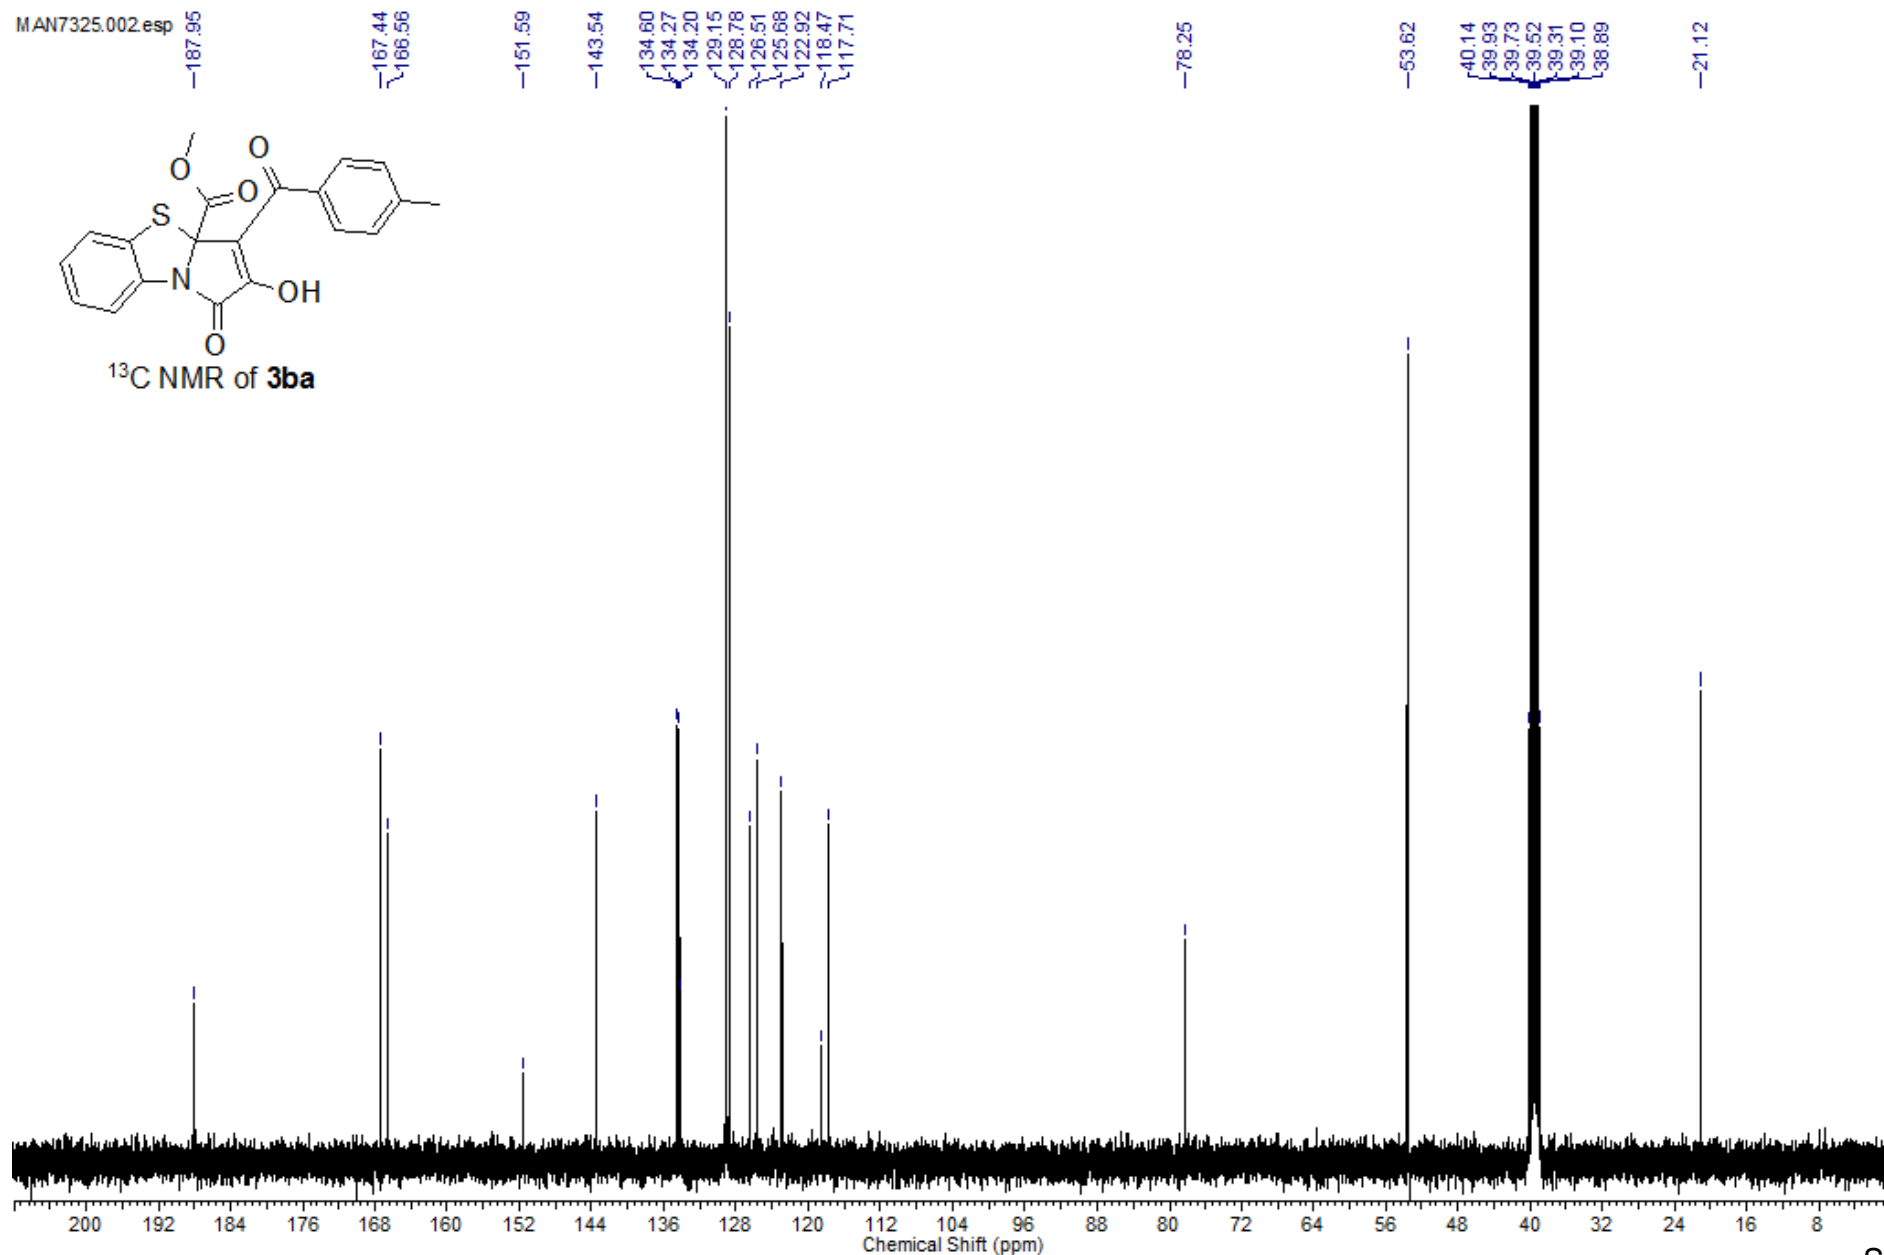

MAN7325.003.esp

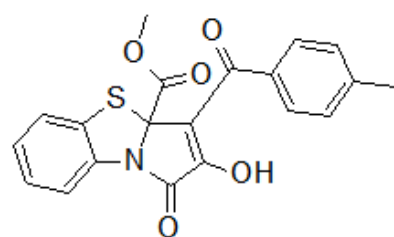

DEPT 135 of **3ba**

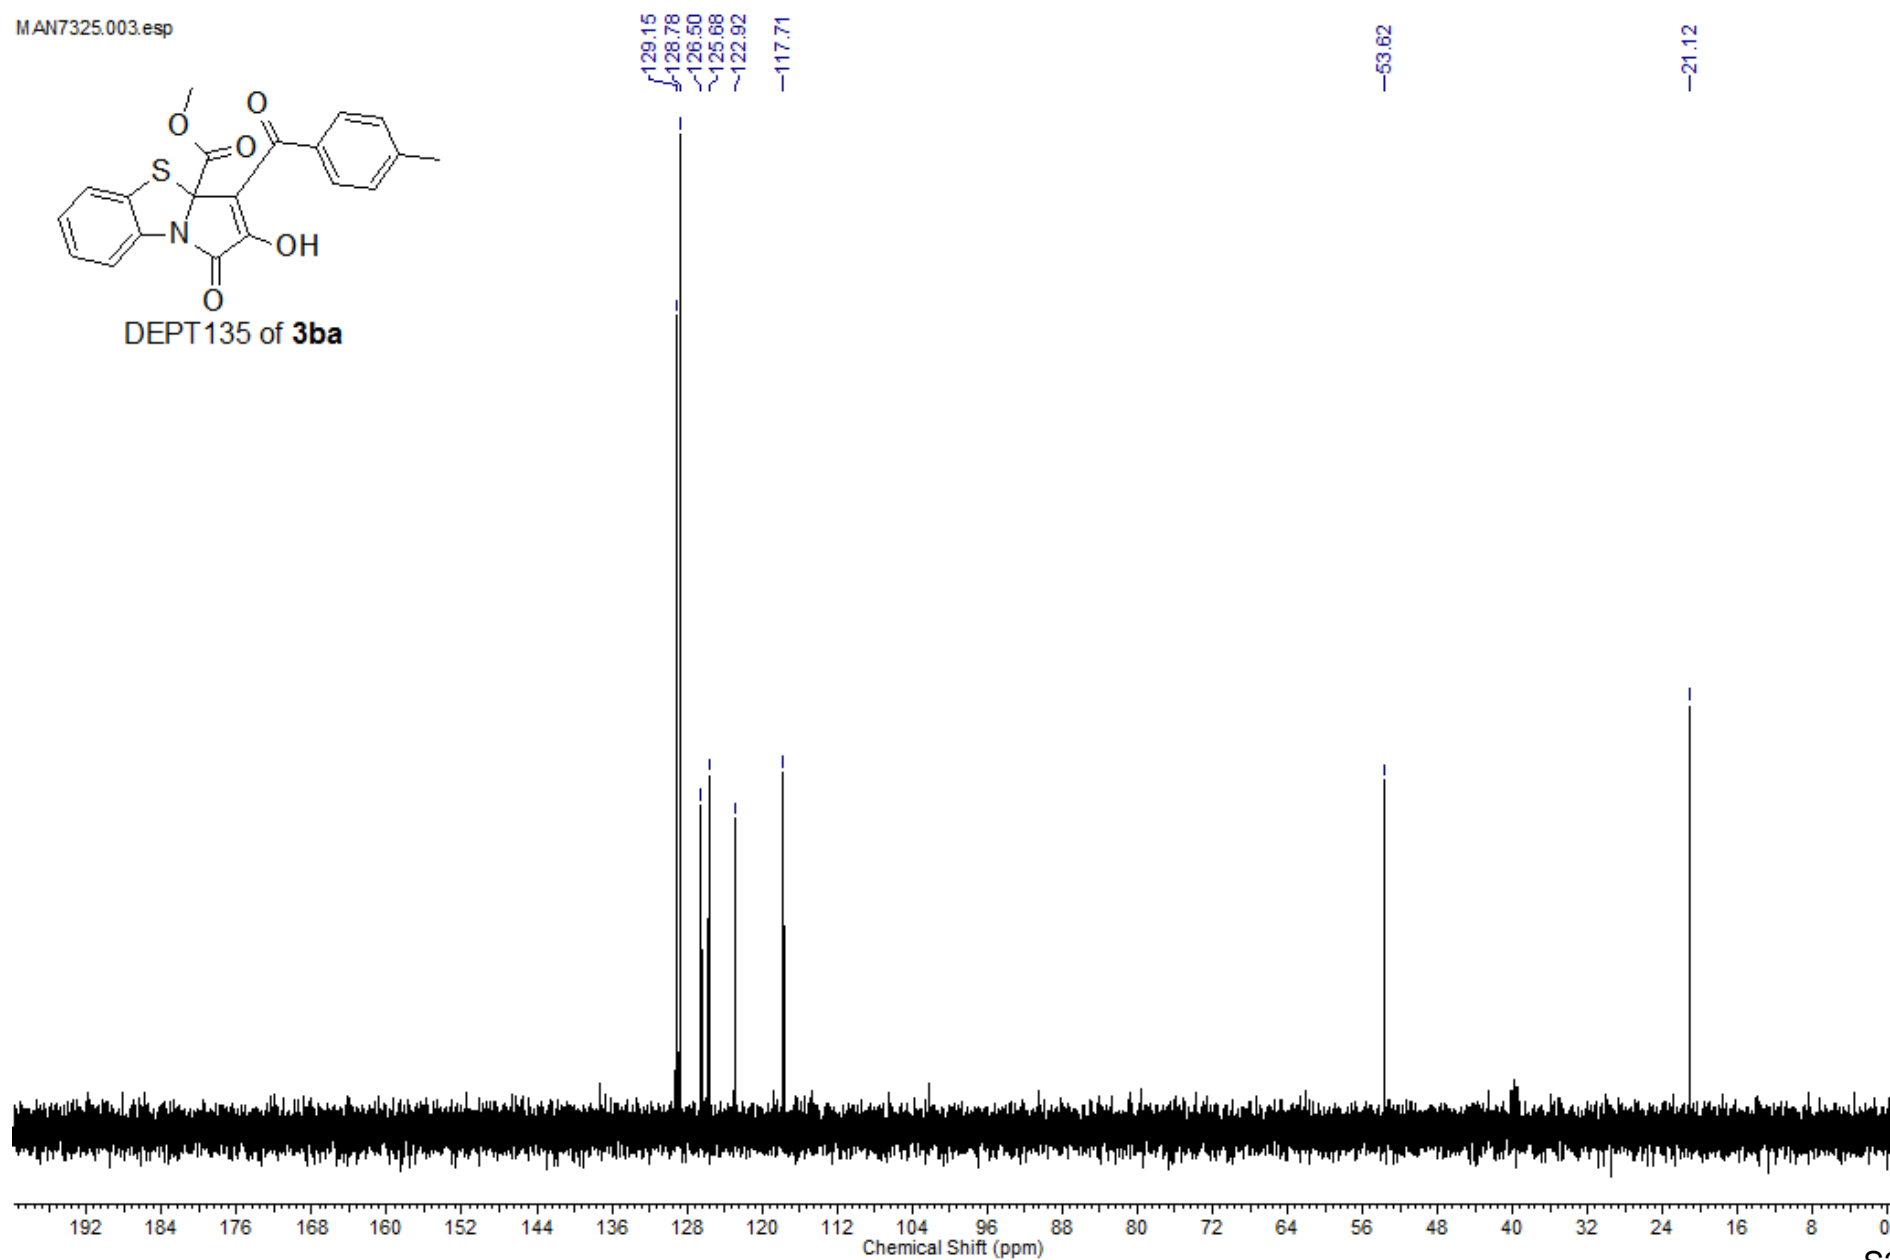



MAN7807.001.esp

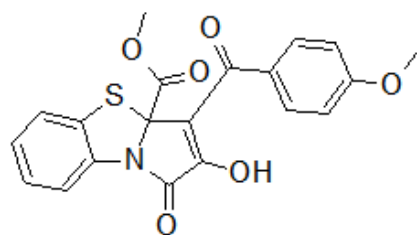

<sup>1</sup>H NMR of **3ca**

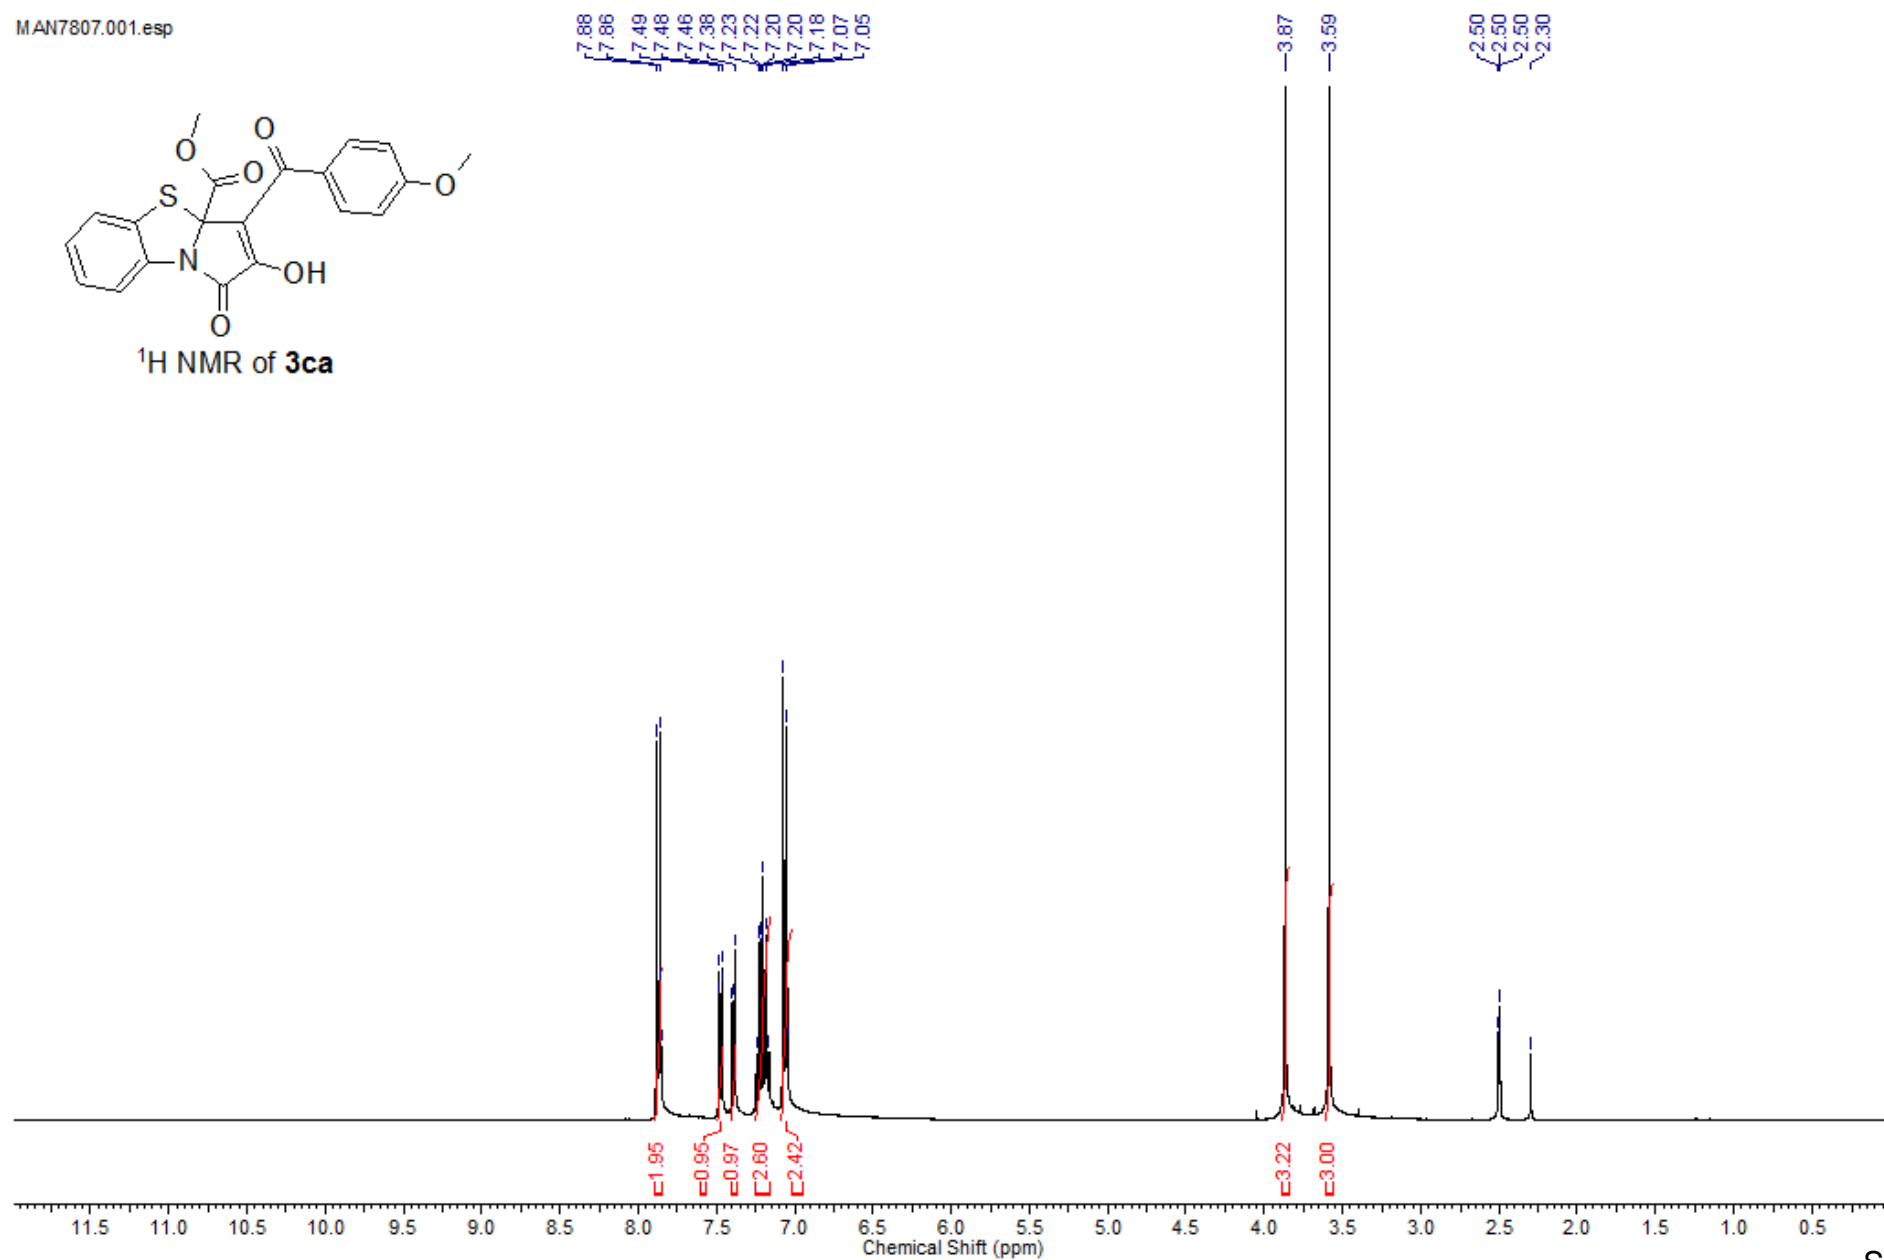

MAN7807.002.esp

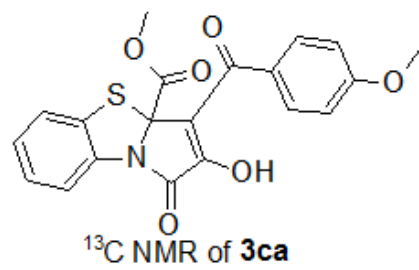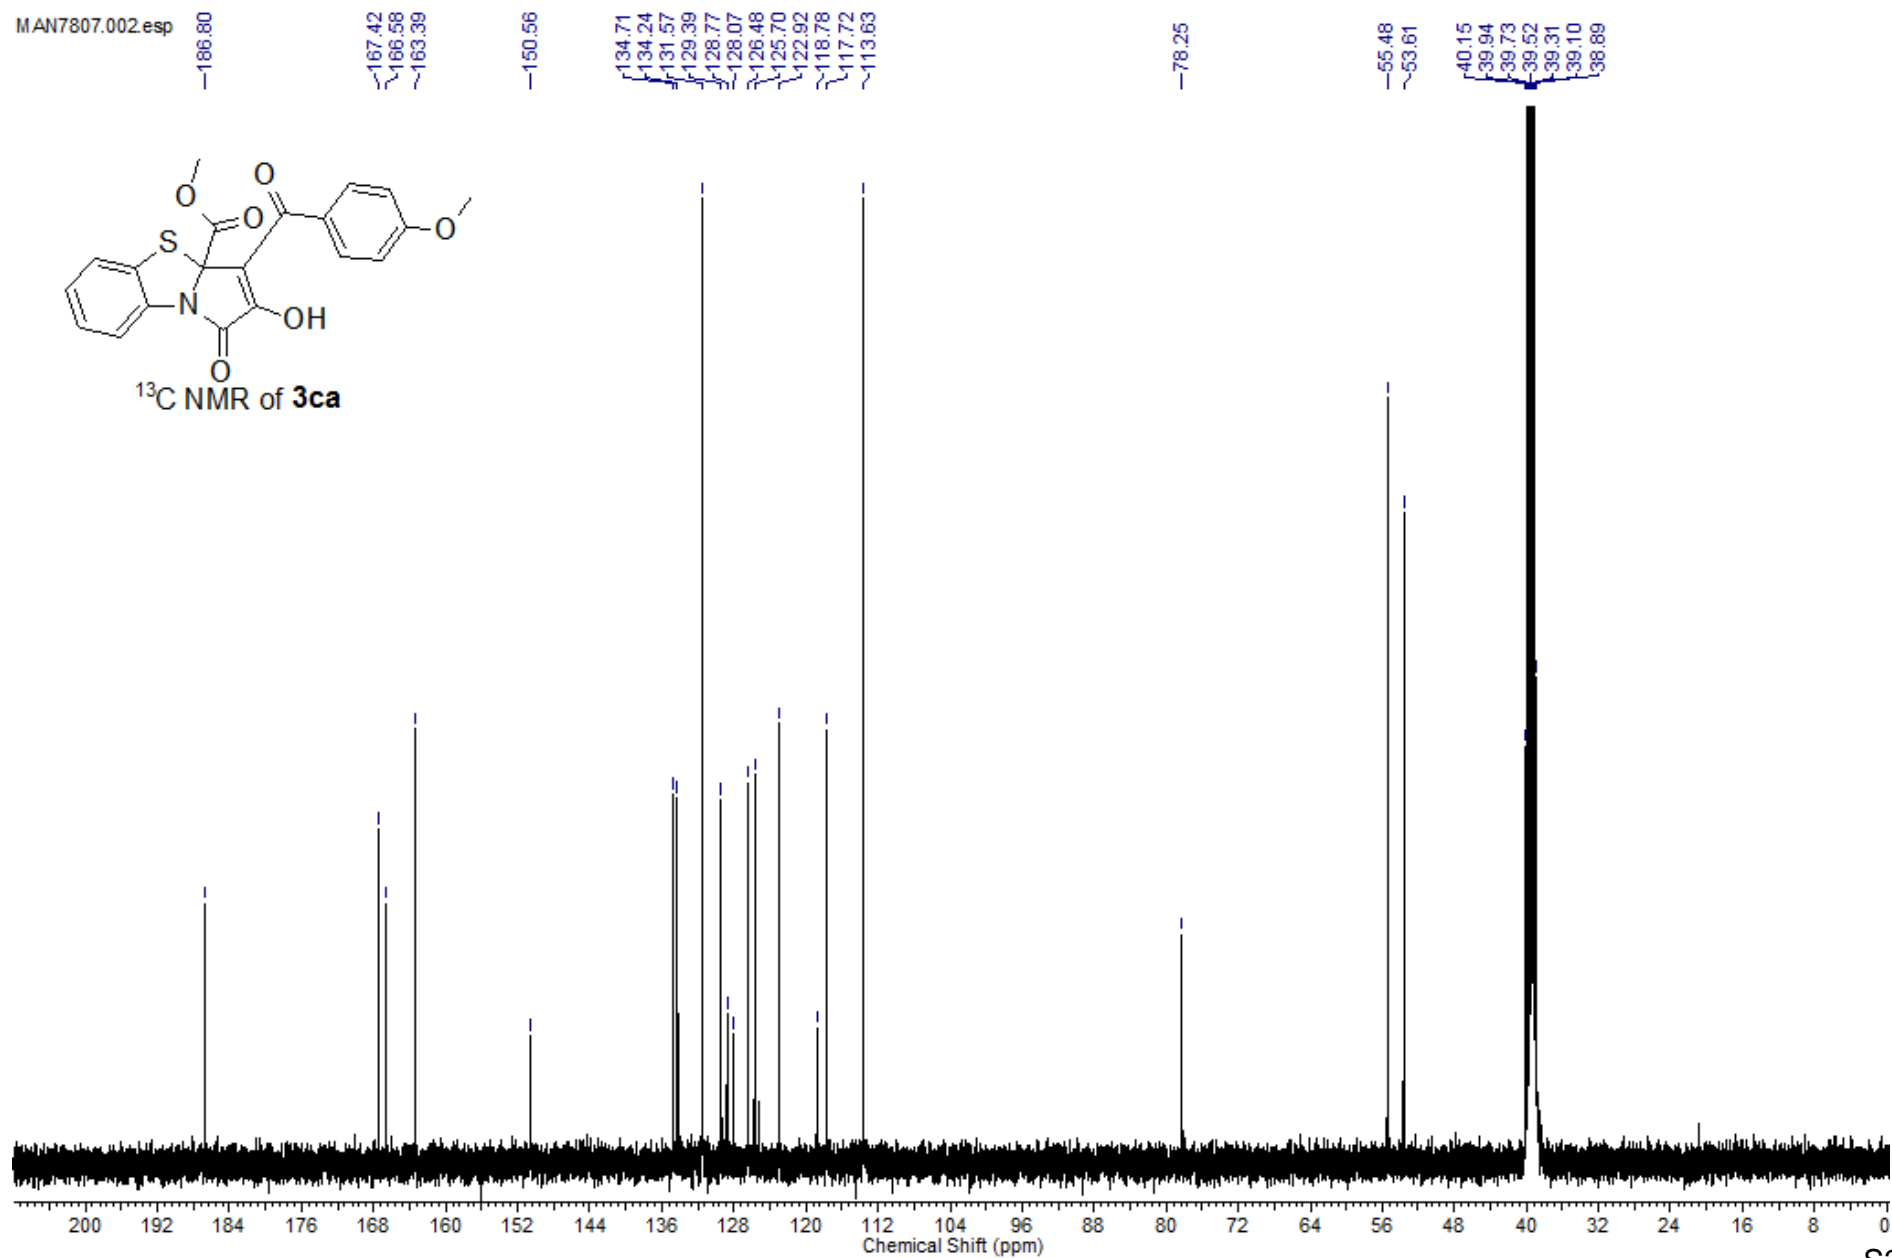

MAN7807.003.esp

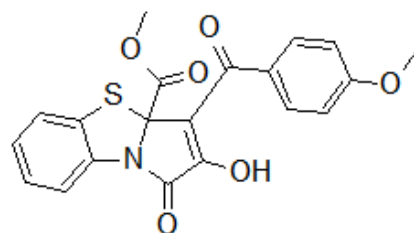

DEPT 135 of **3ca**

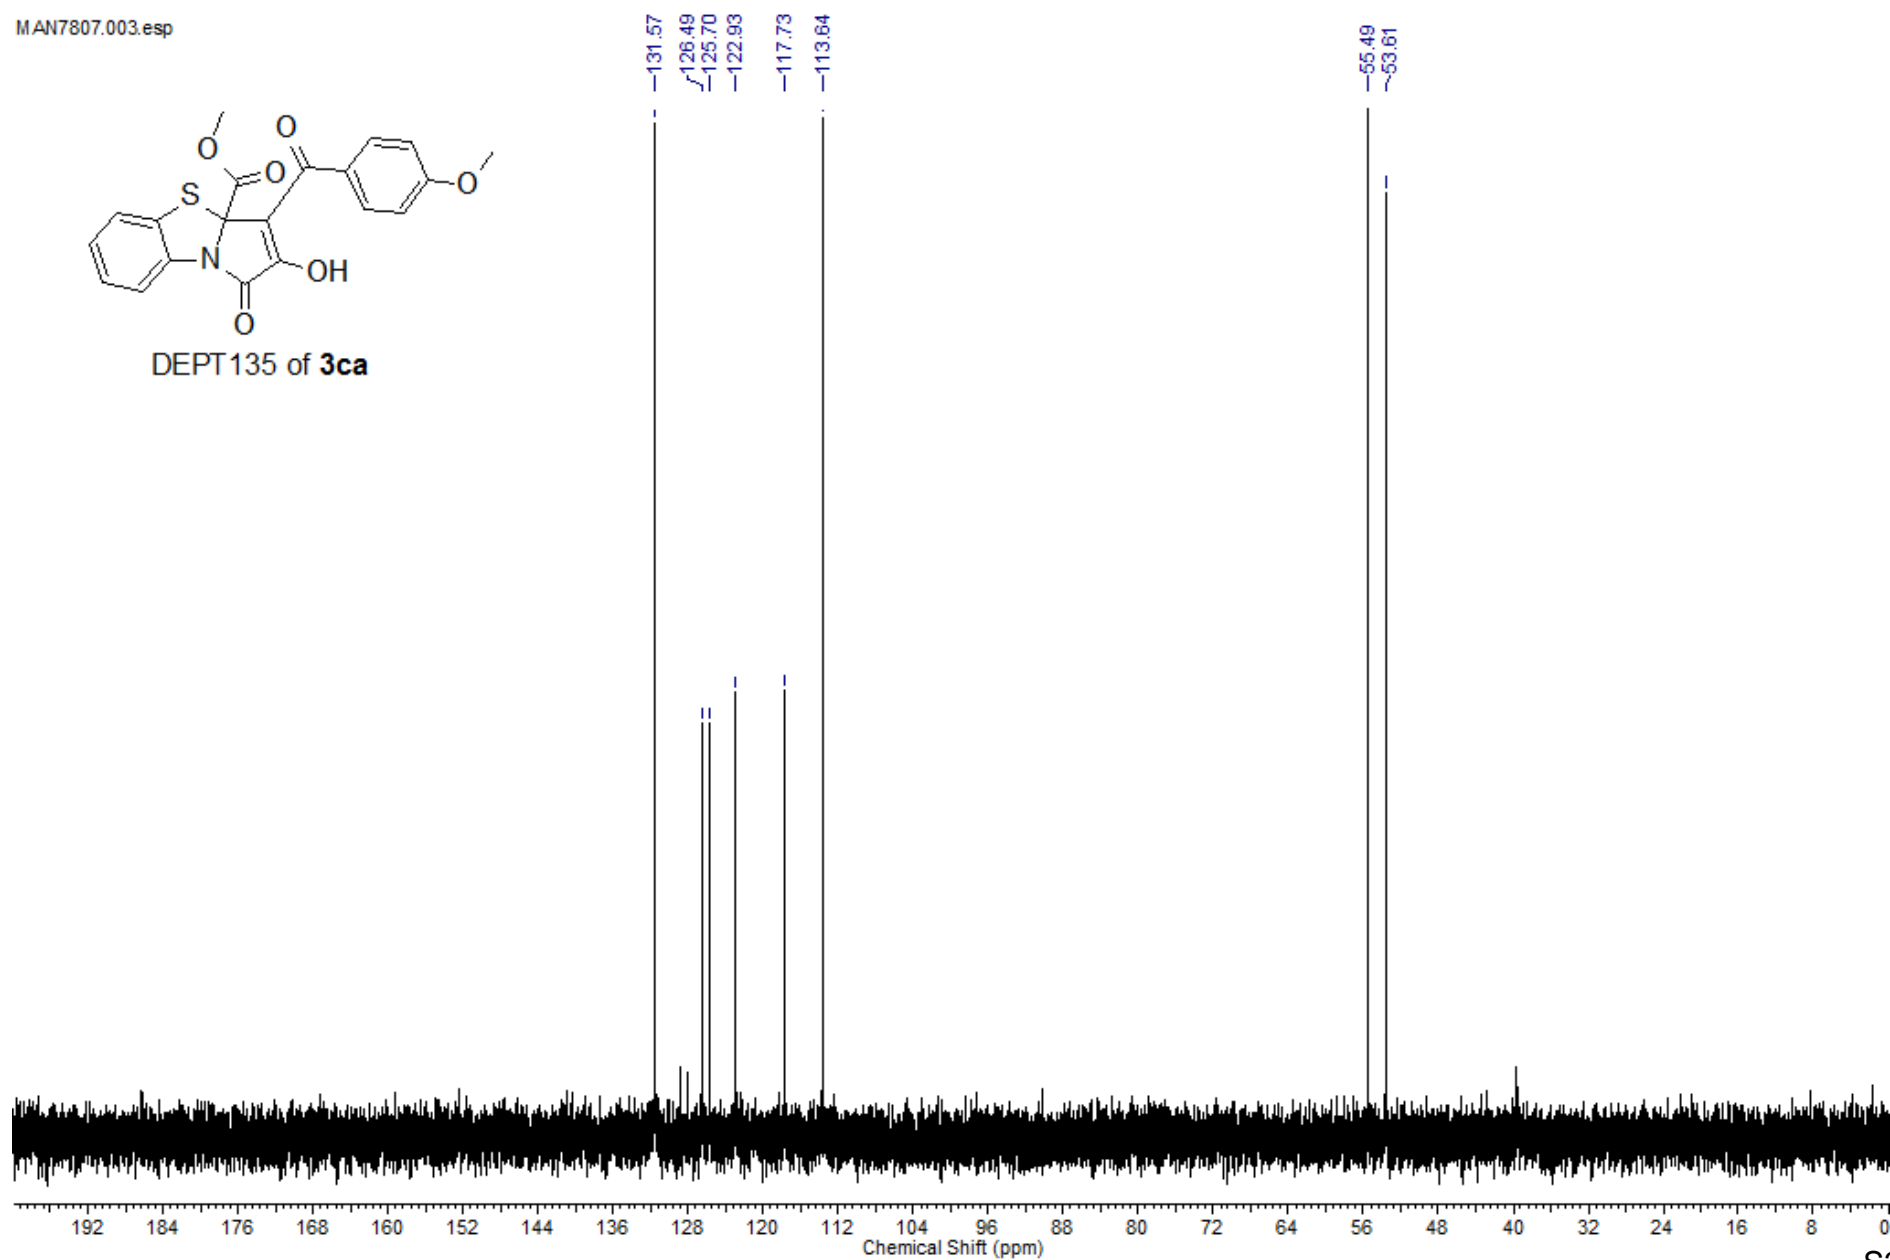

MAN7902.004.esp

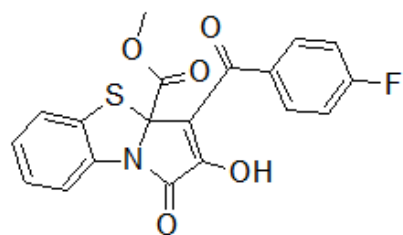

<sup>1</sup>H NMR of **3da**

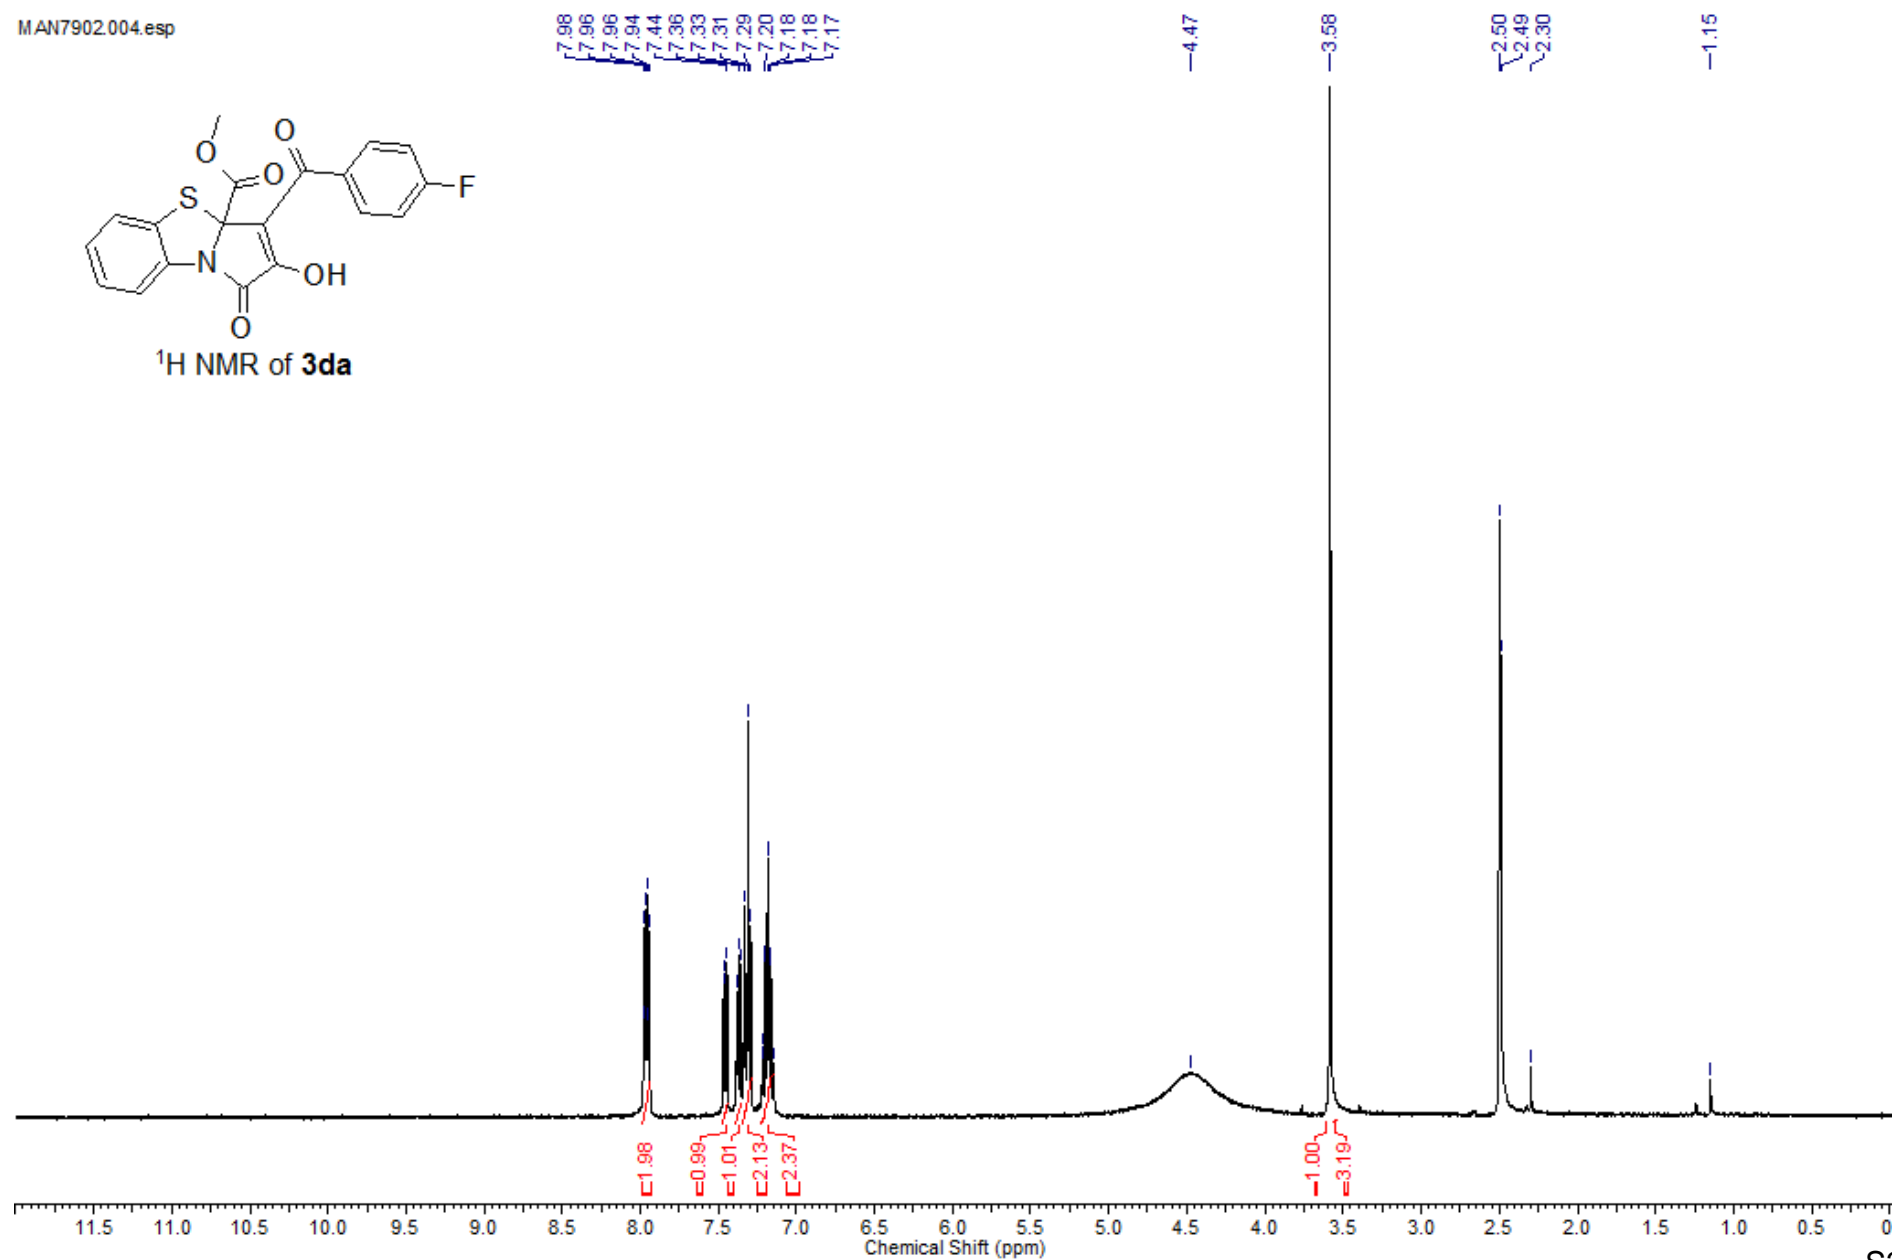

MAN7902.002.esp

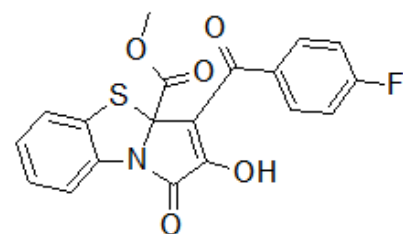

<sup>13</sup>C NMR of **3da**

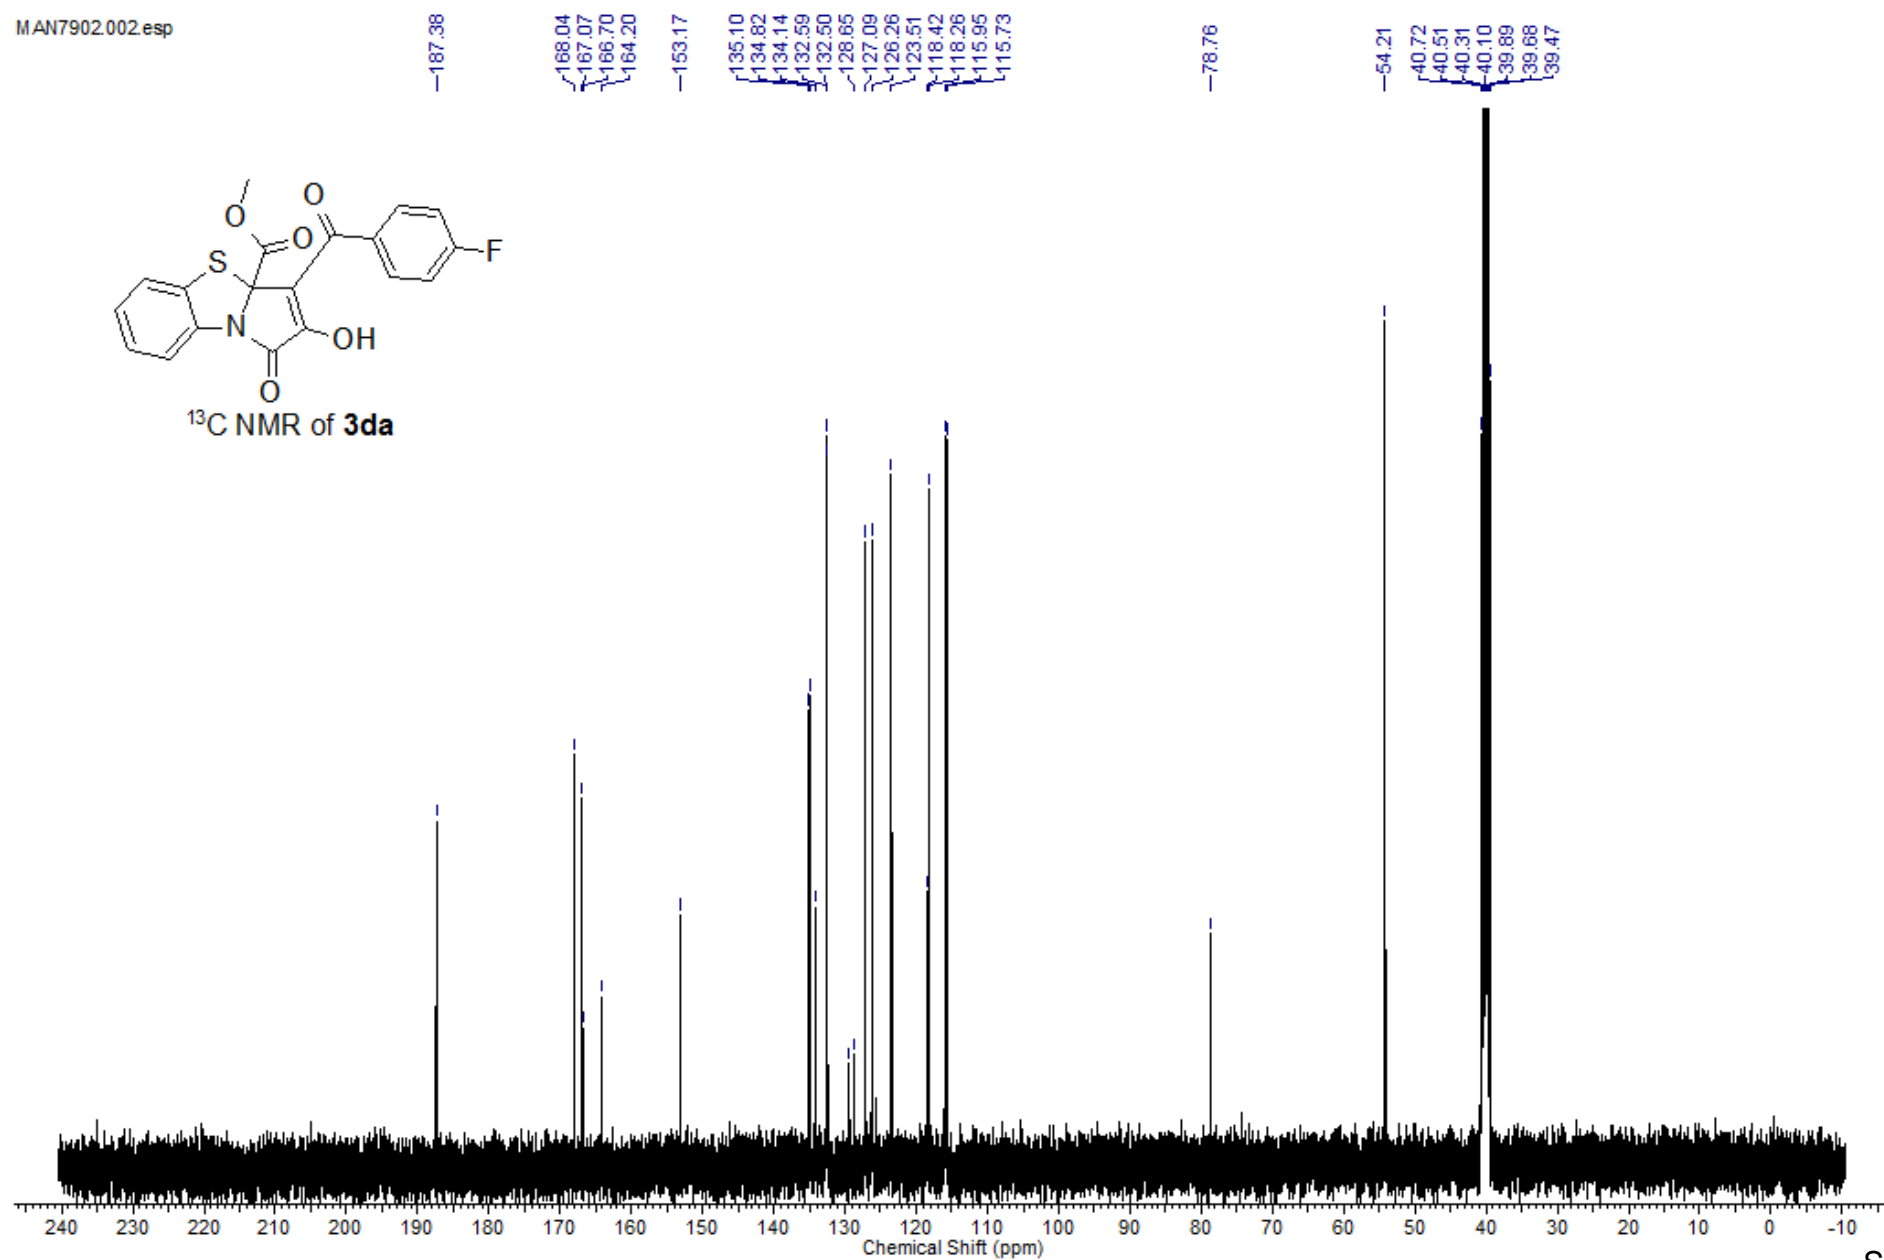

MAN7902.003.esp

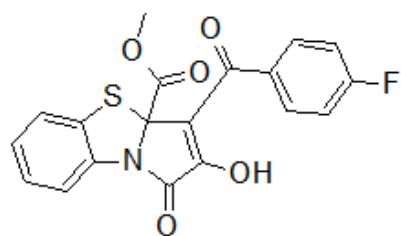

DEPT 135 of **3da**

132.01  
131.92  
126.51  
125.68  
122.93  
117.69  
115.37  
115.16

53.63

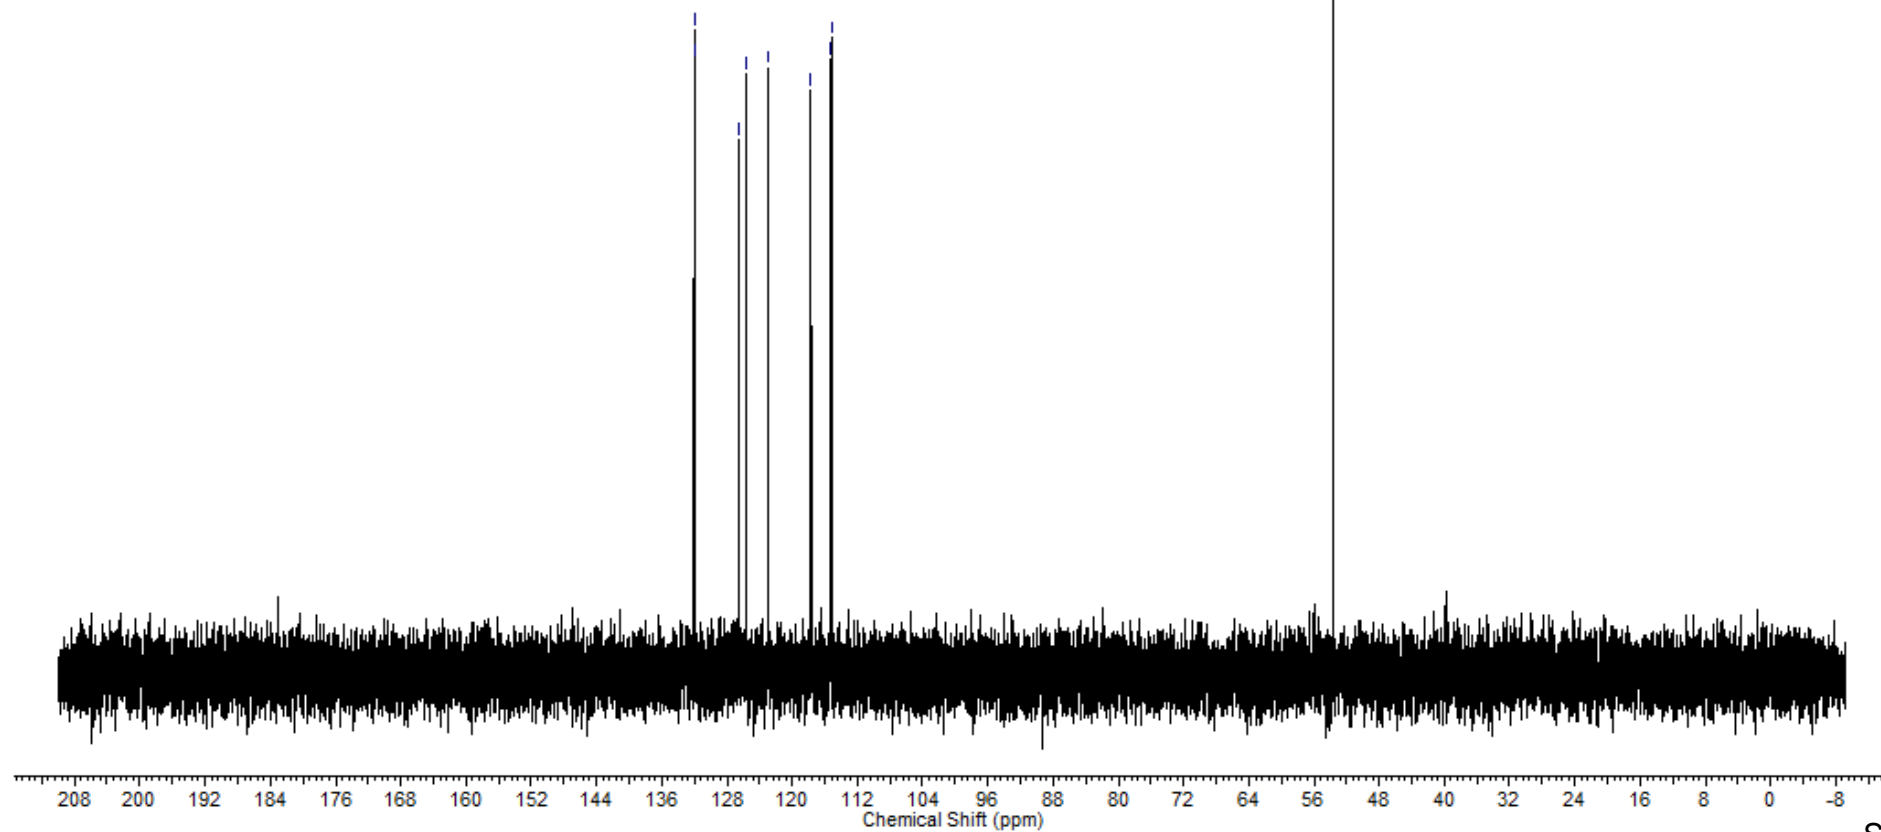

MAN7333.001.esp

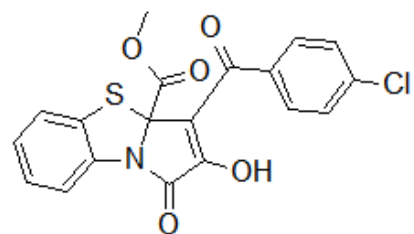

<sup>1</sup>H NMR of 3ea

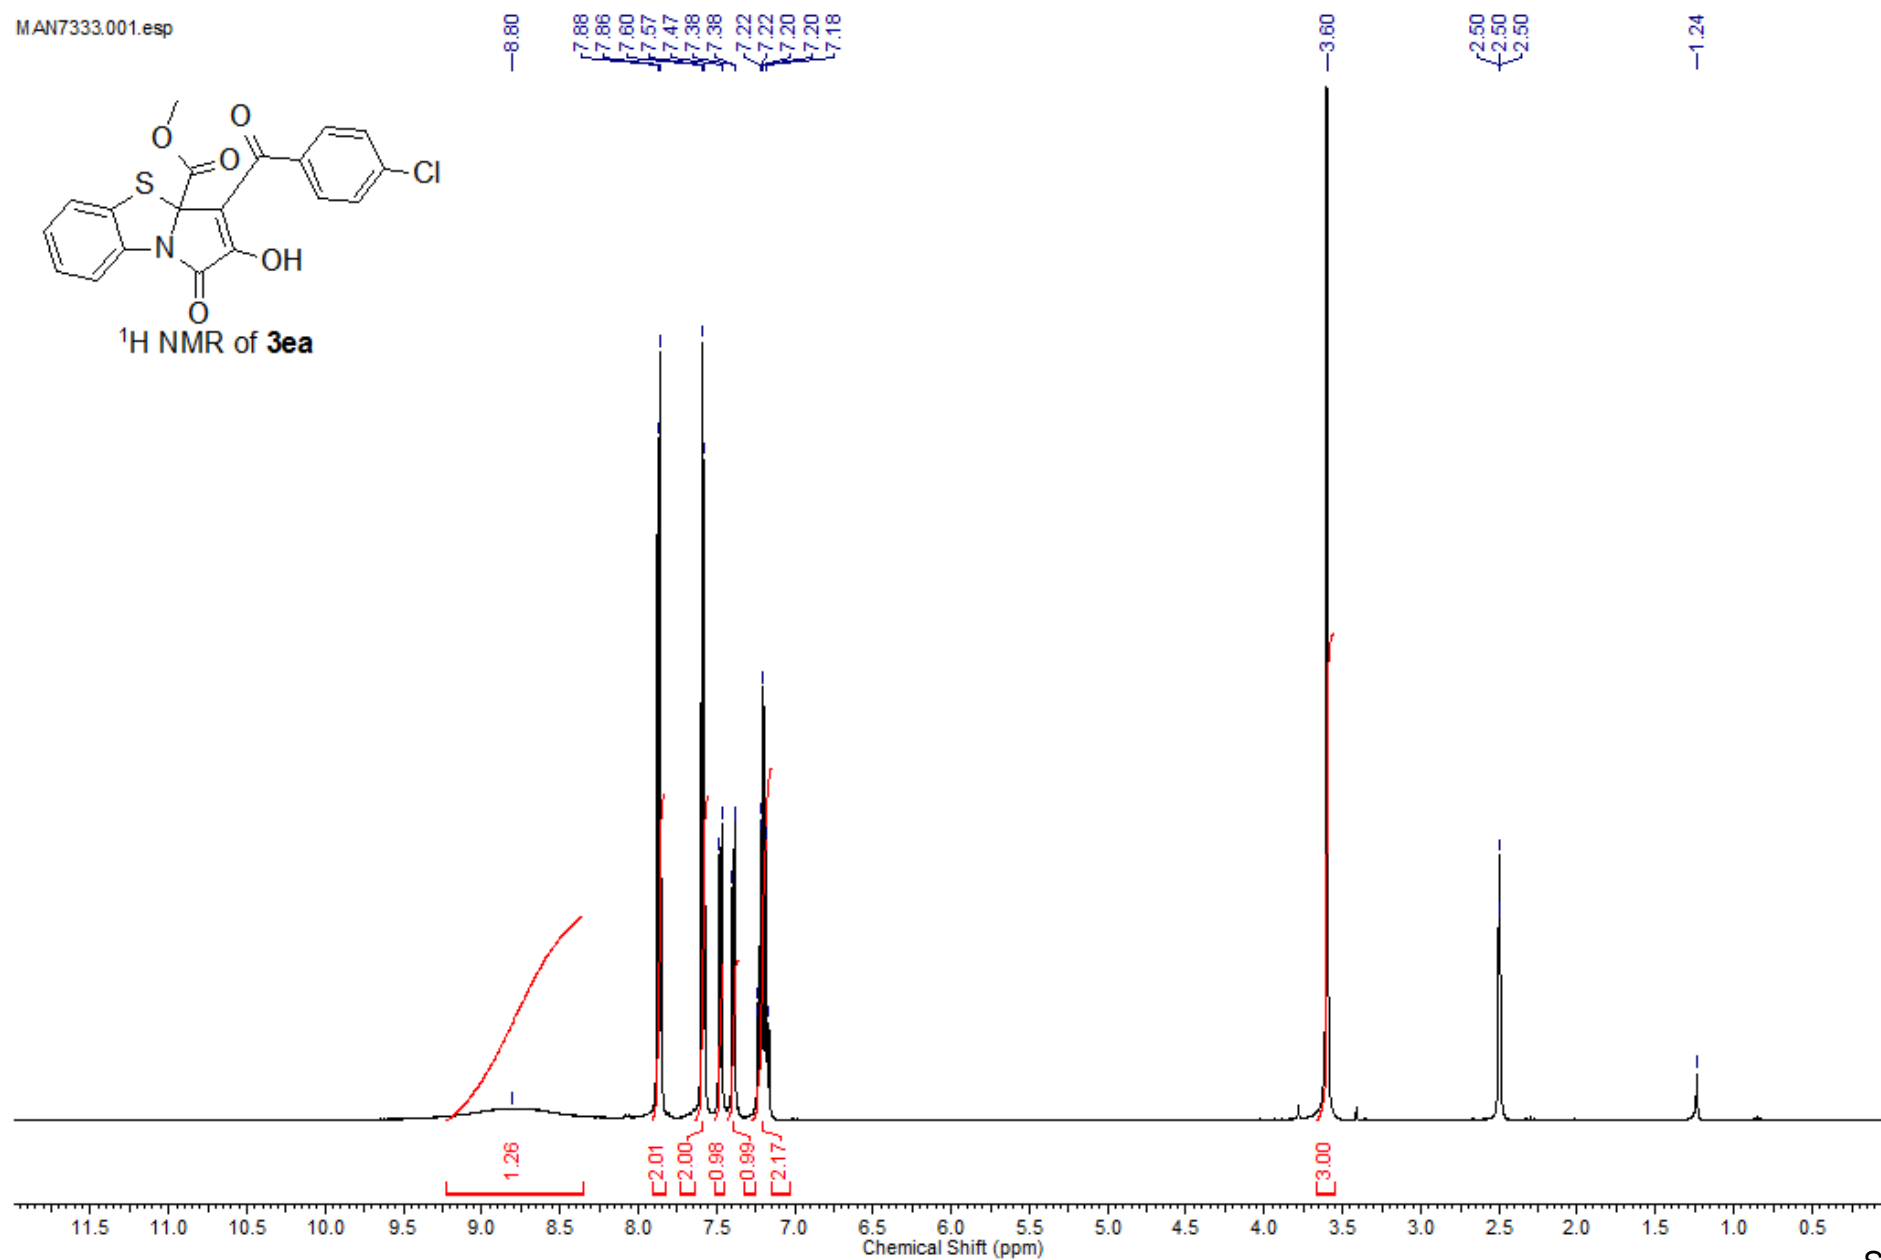

MAN7333.002.esp

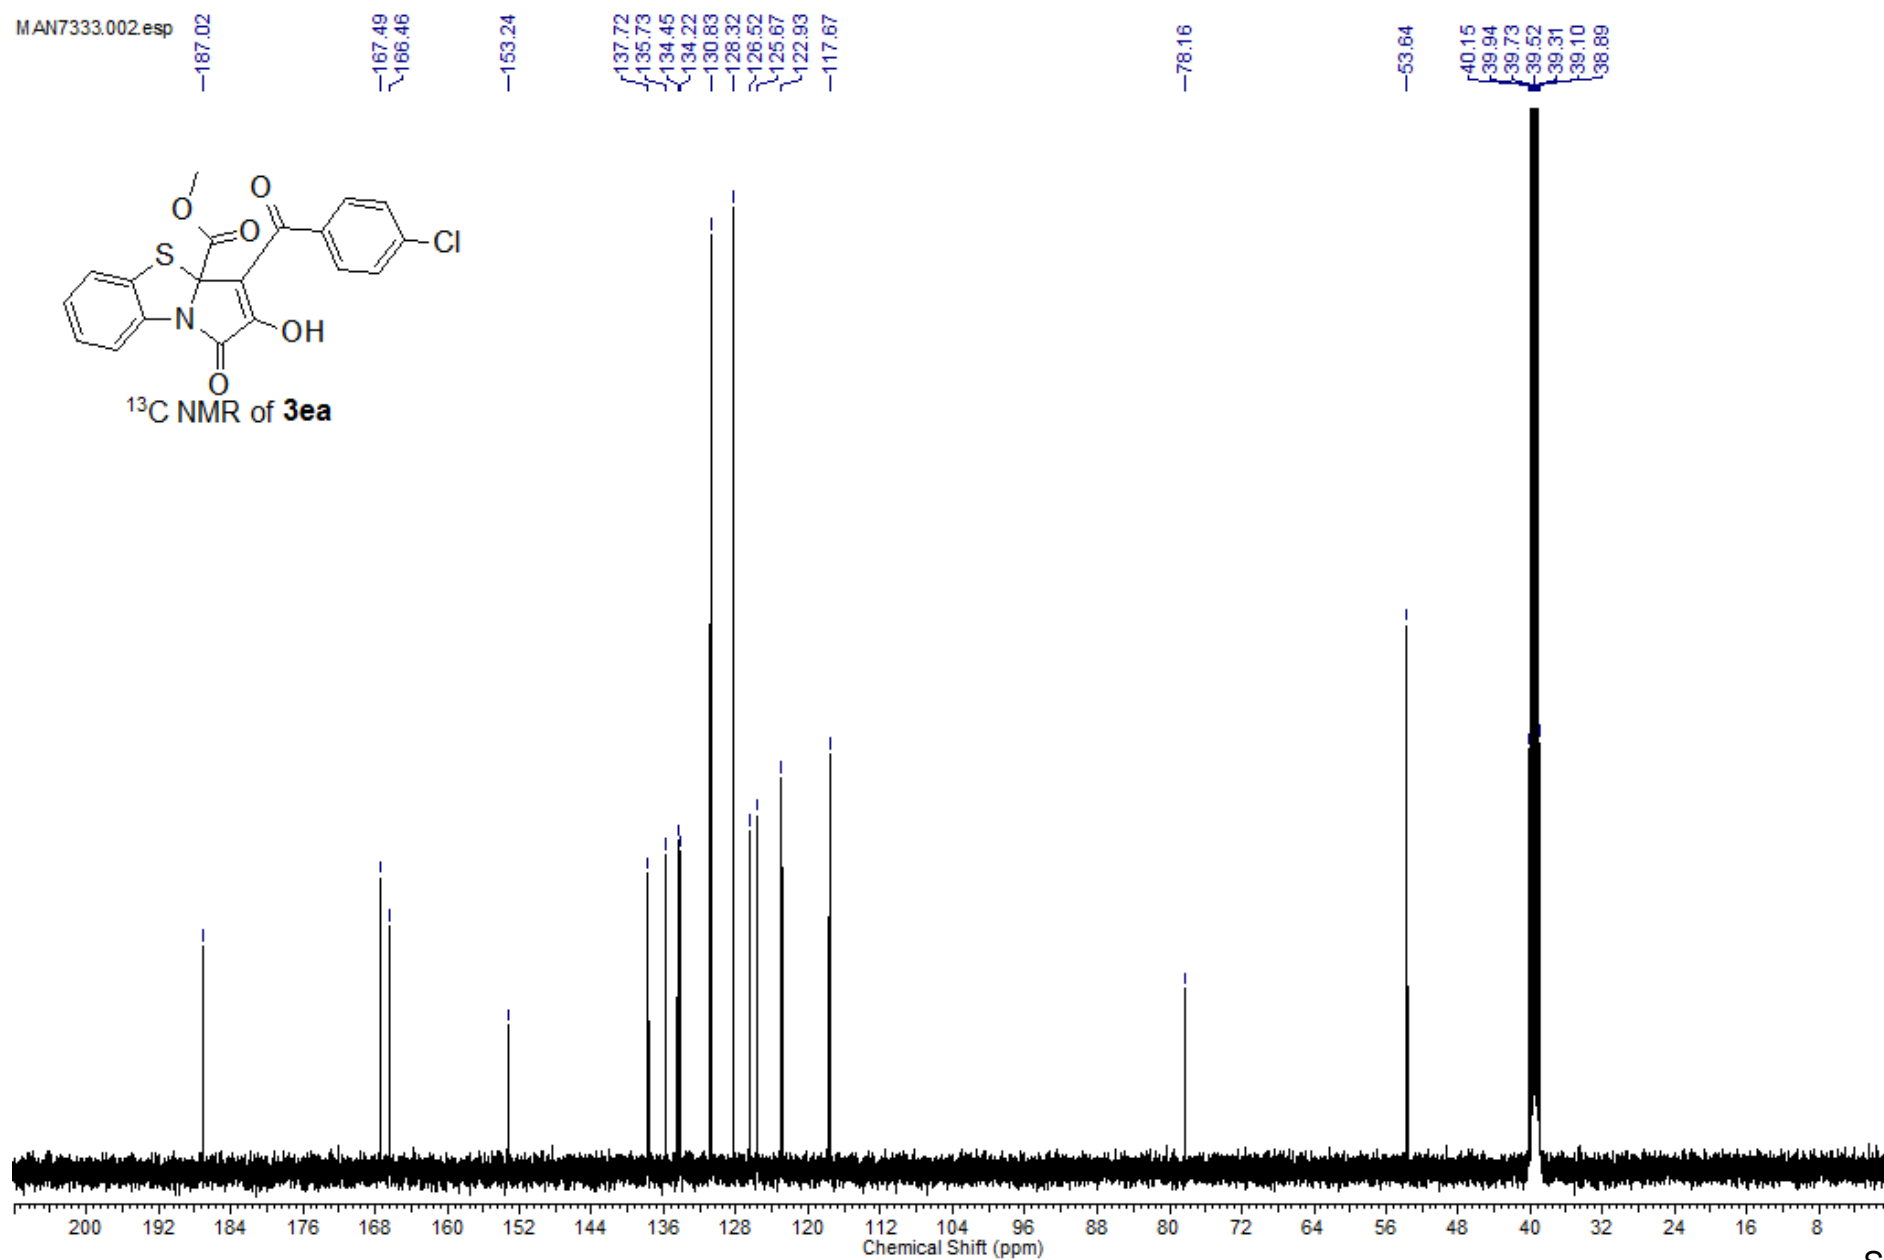



MAN7333.003.esp

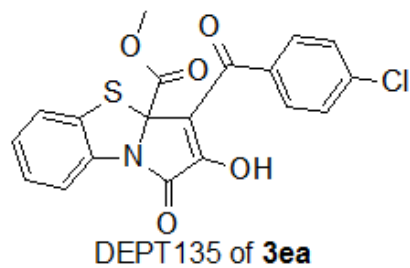

~130.83  
~128.33  
~126.52  
~125.68  
~122.93  
-117.67

-53.64

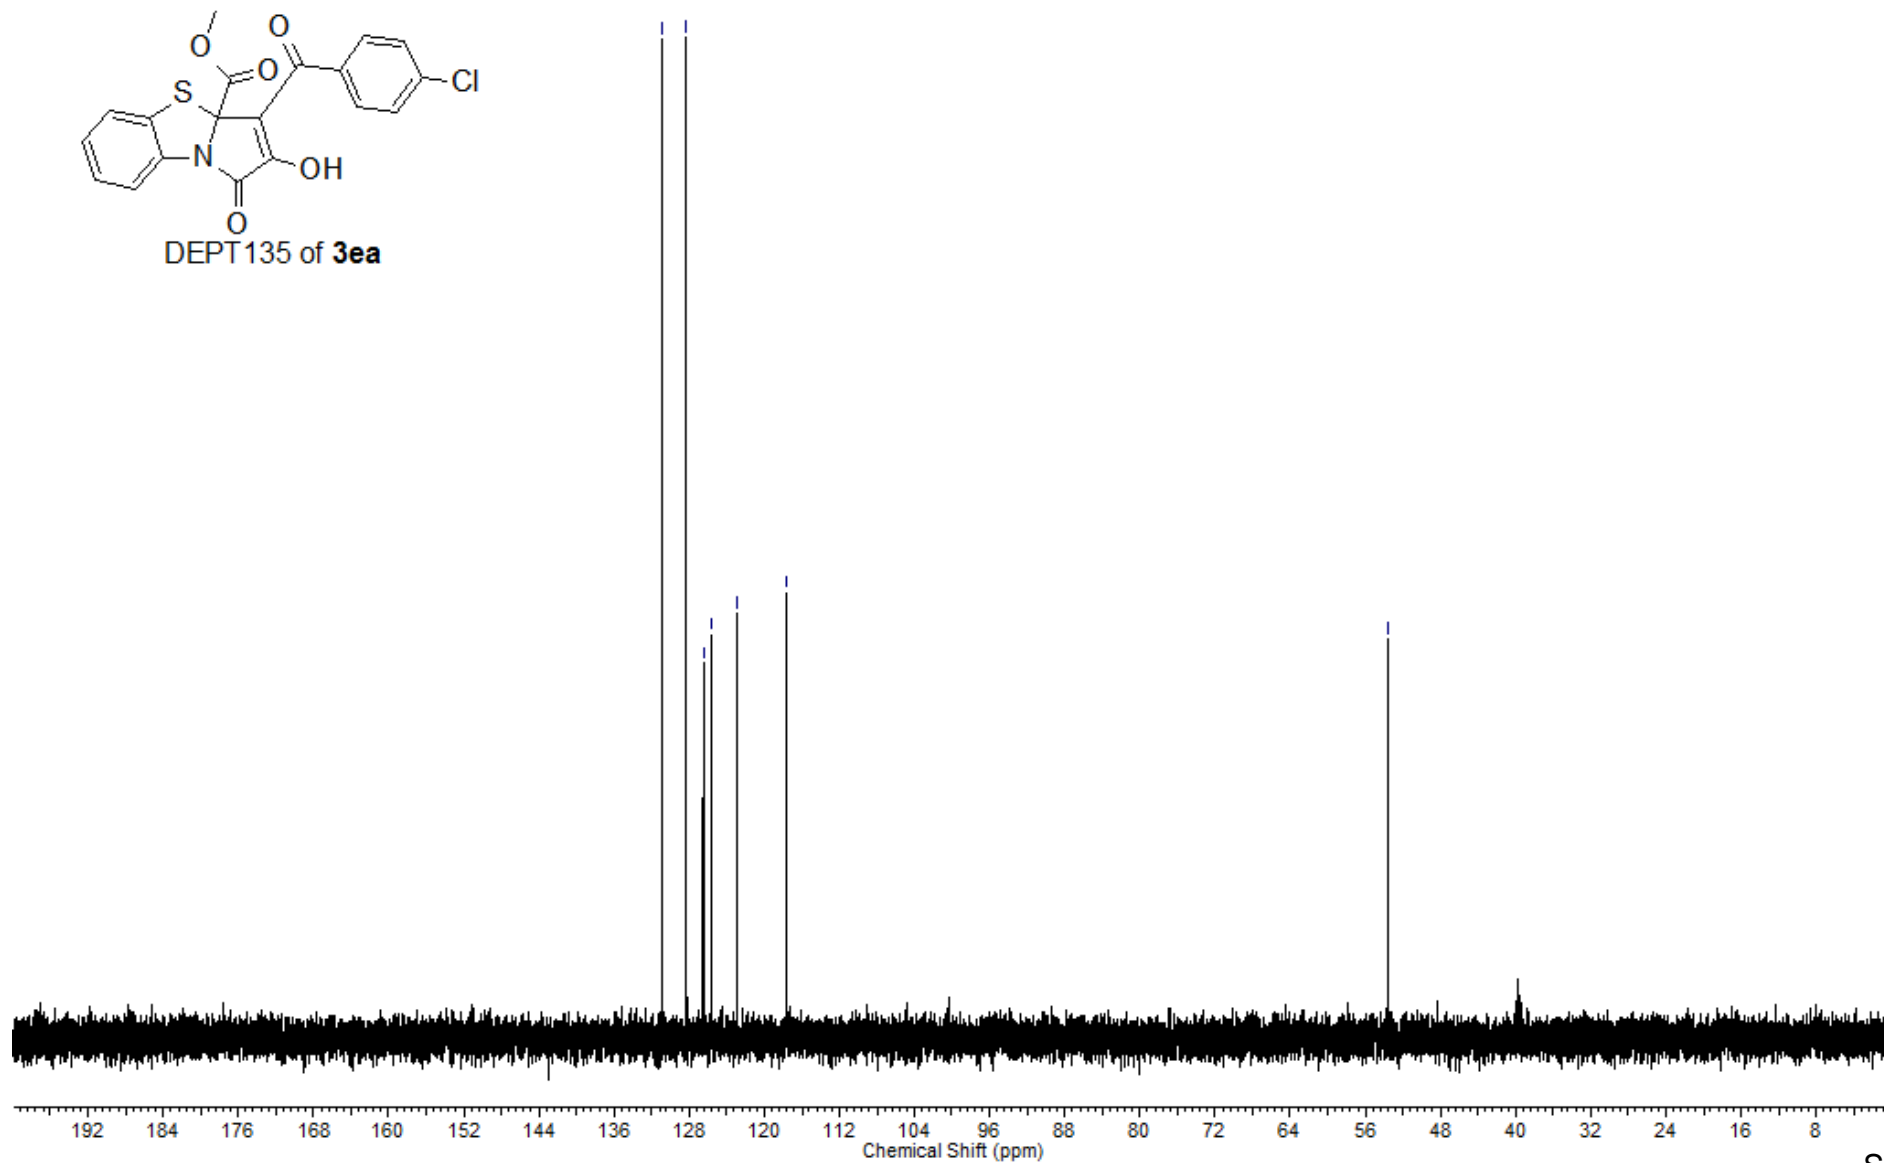

MAN7570.001.esp

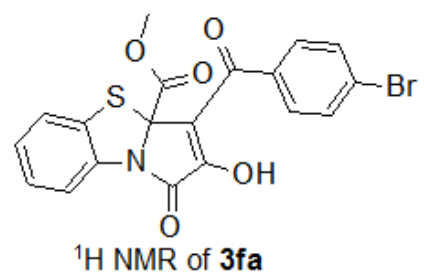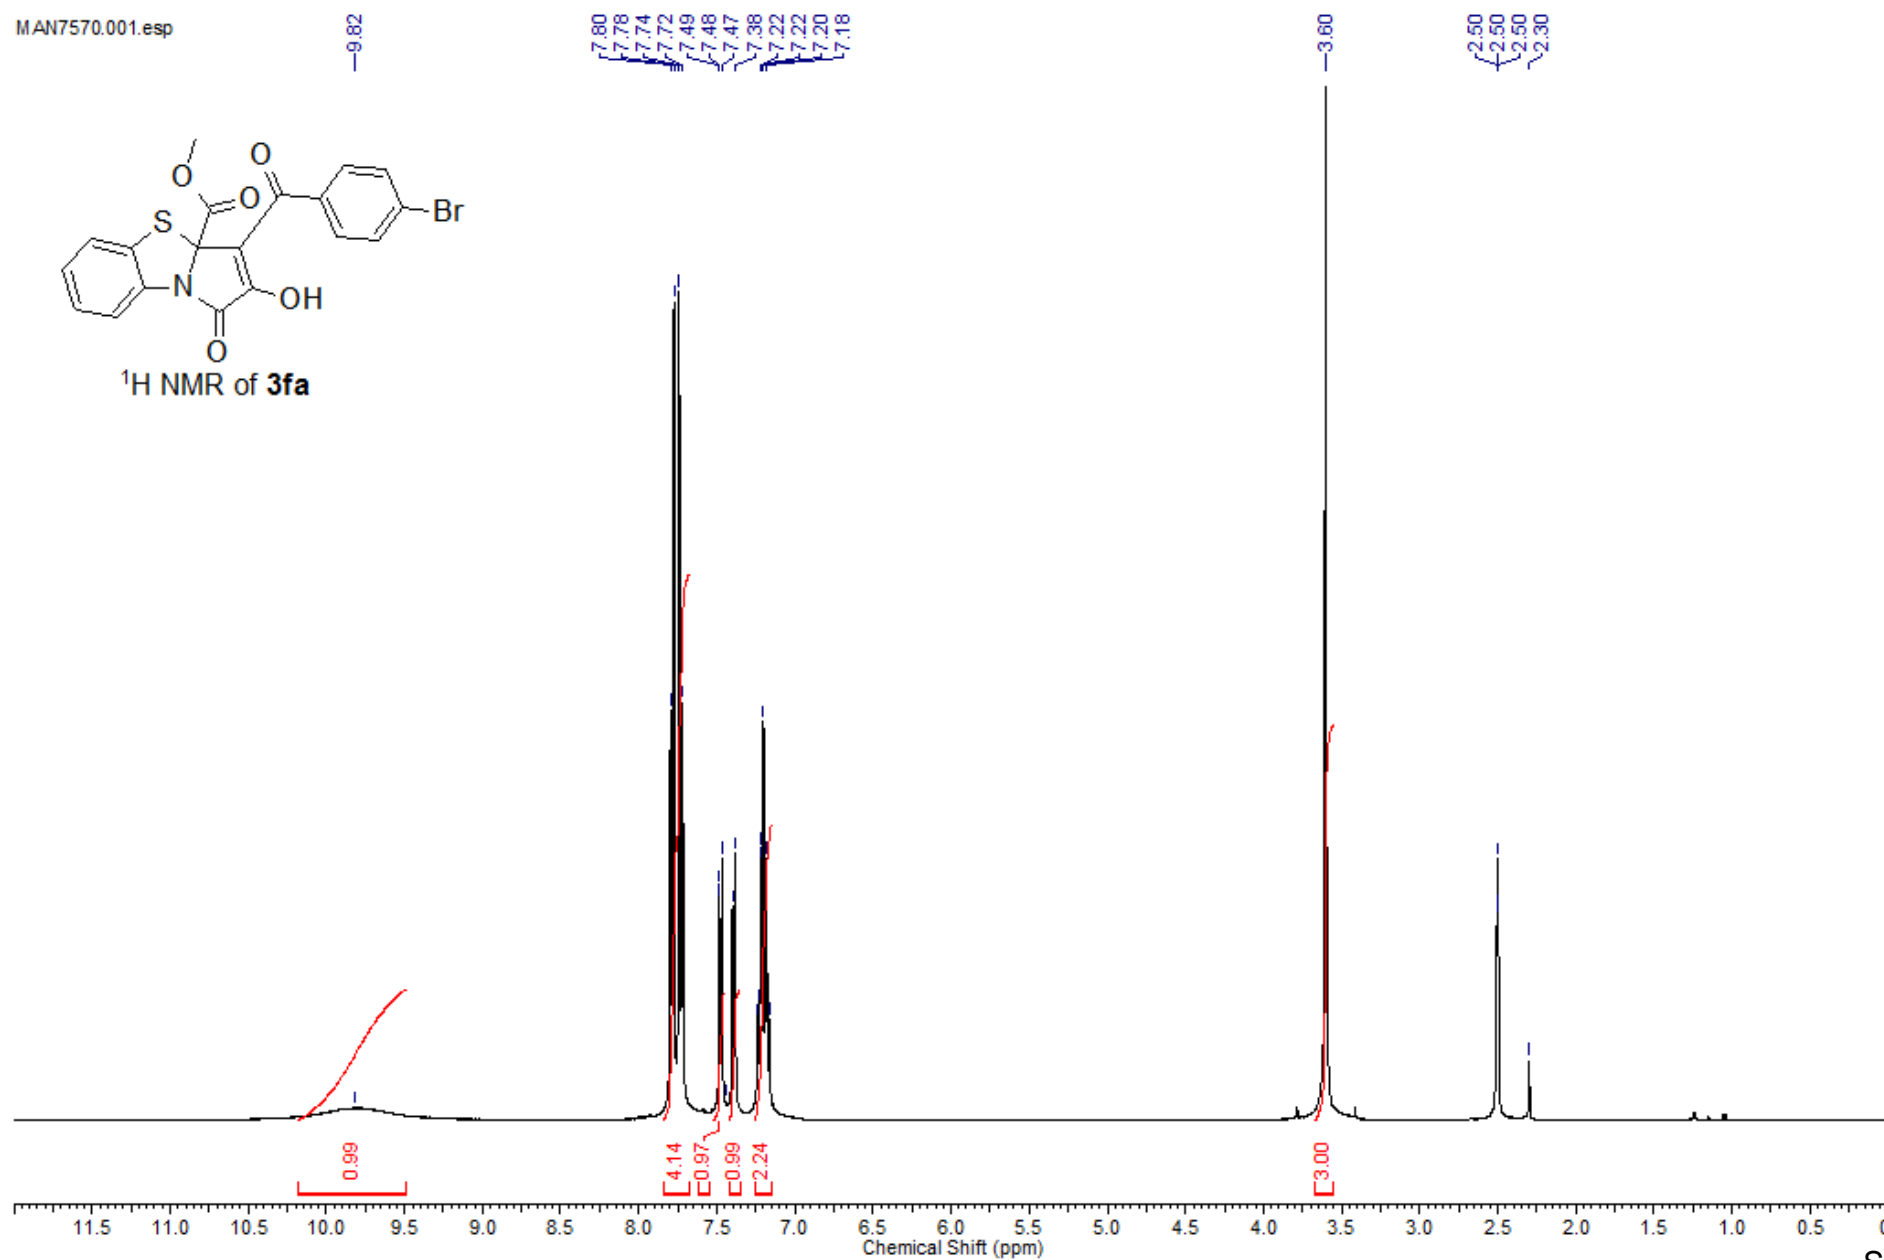

MAN7570.002.esp

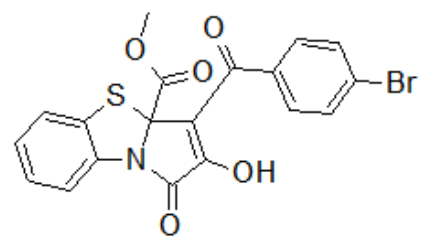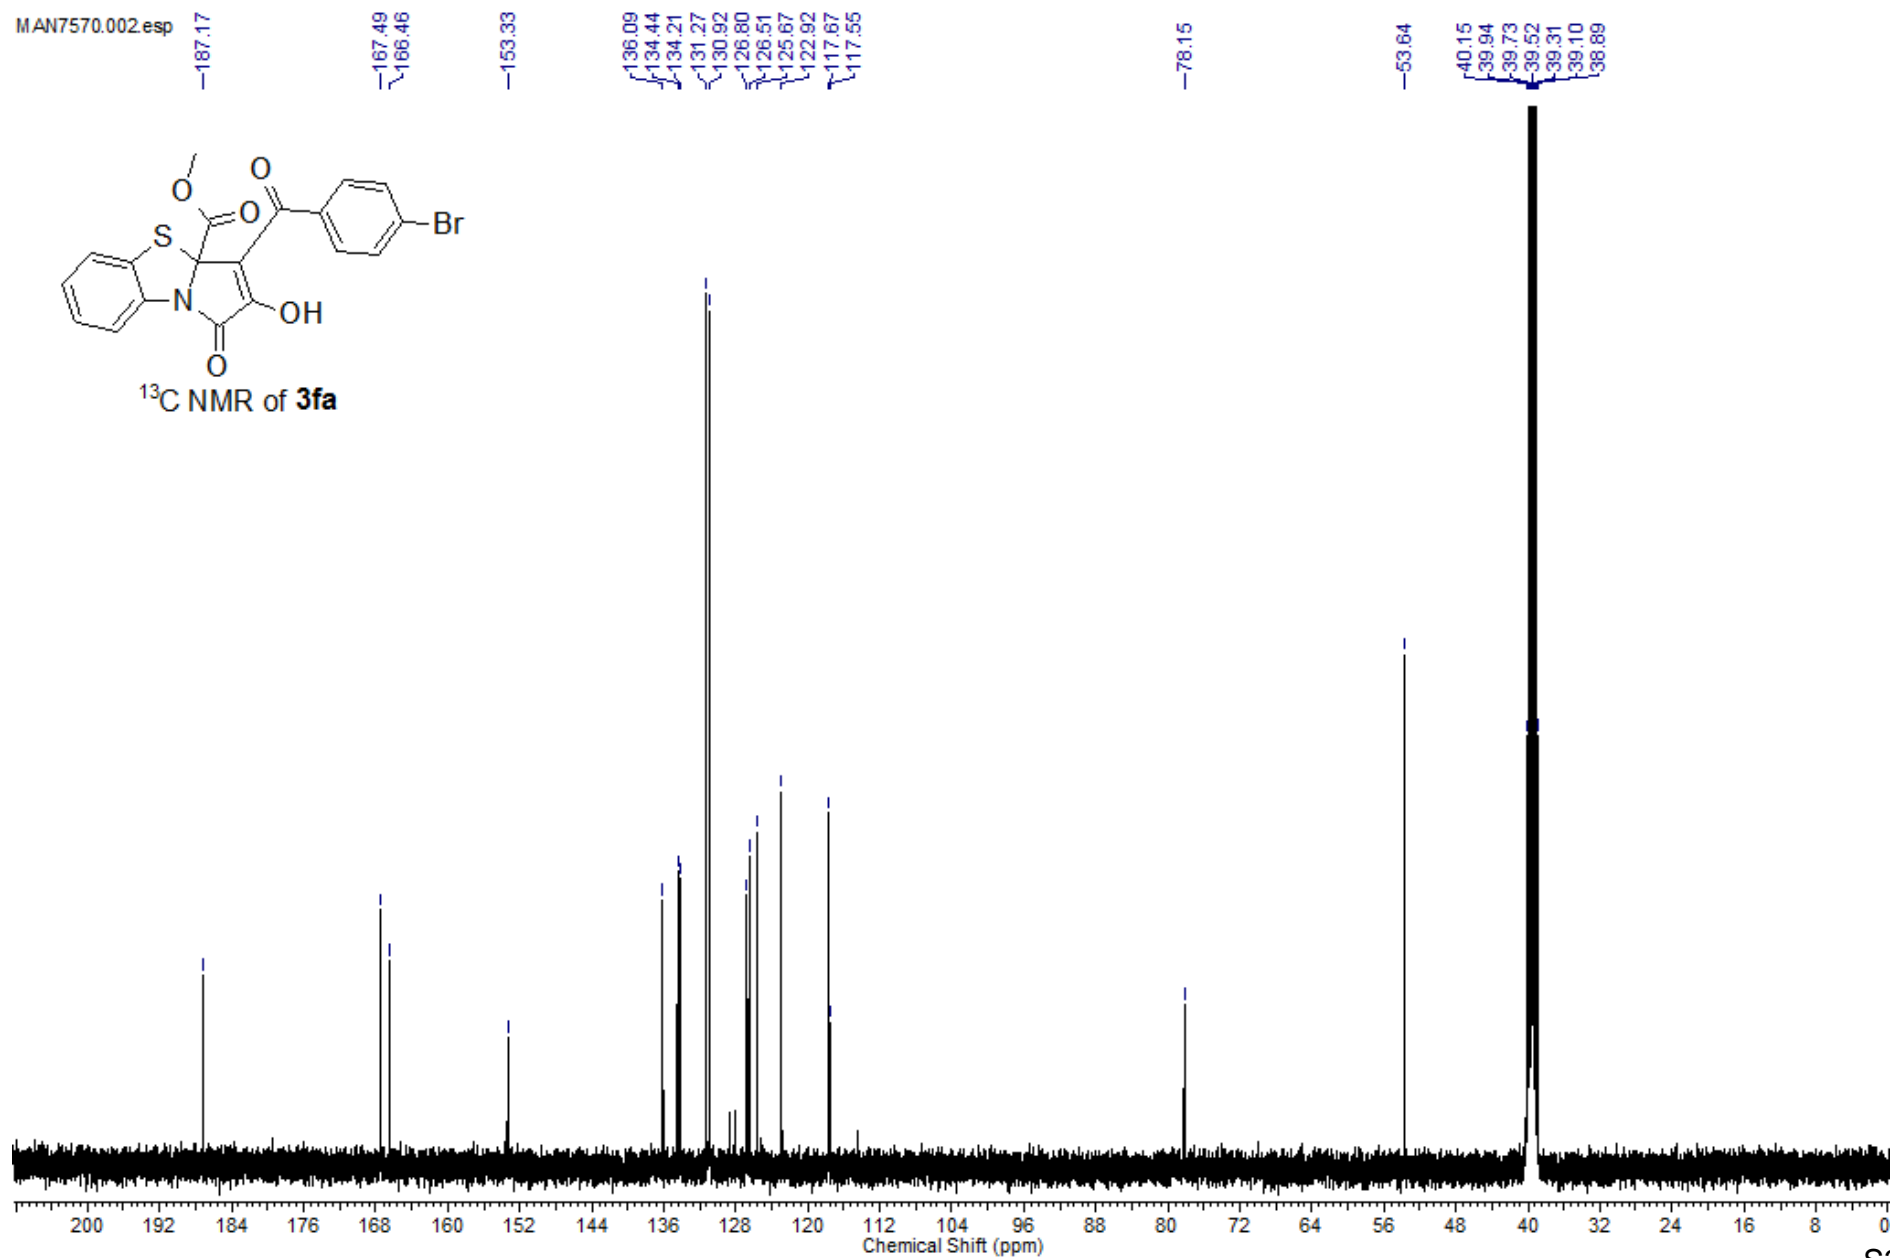

MAN7570.003.esp

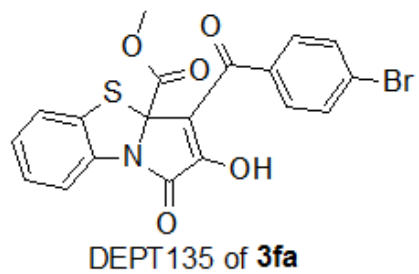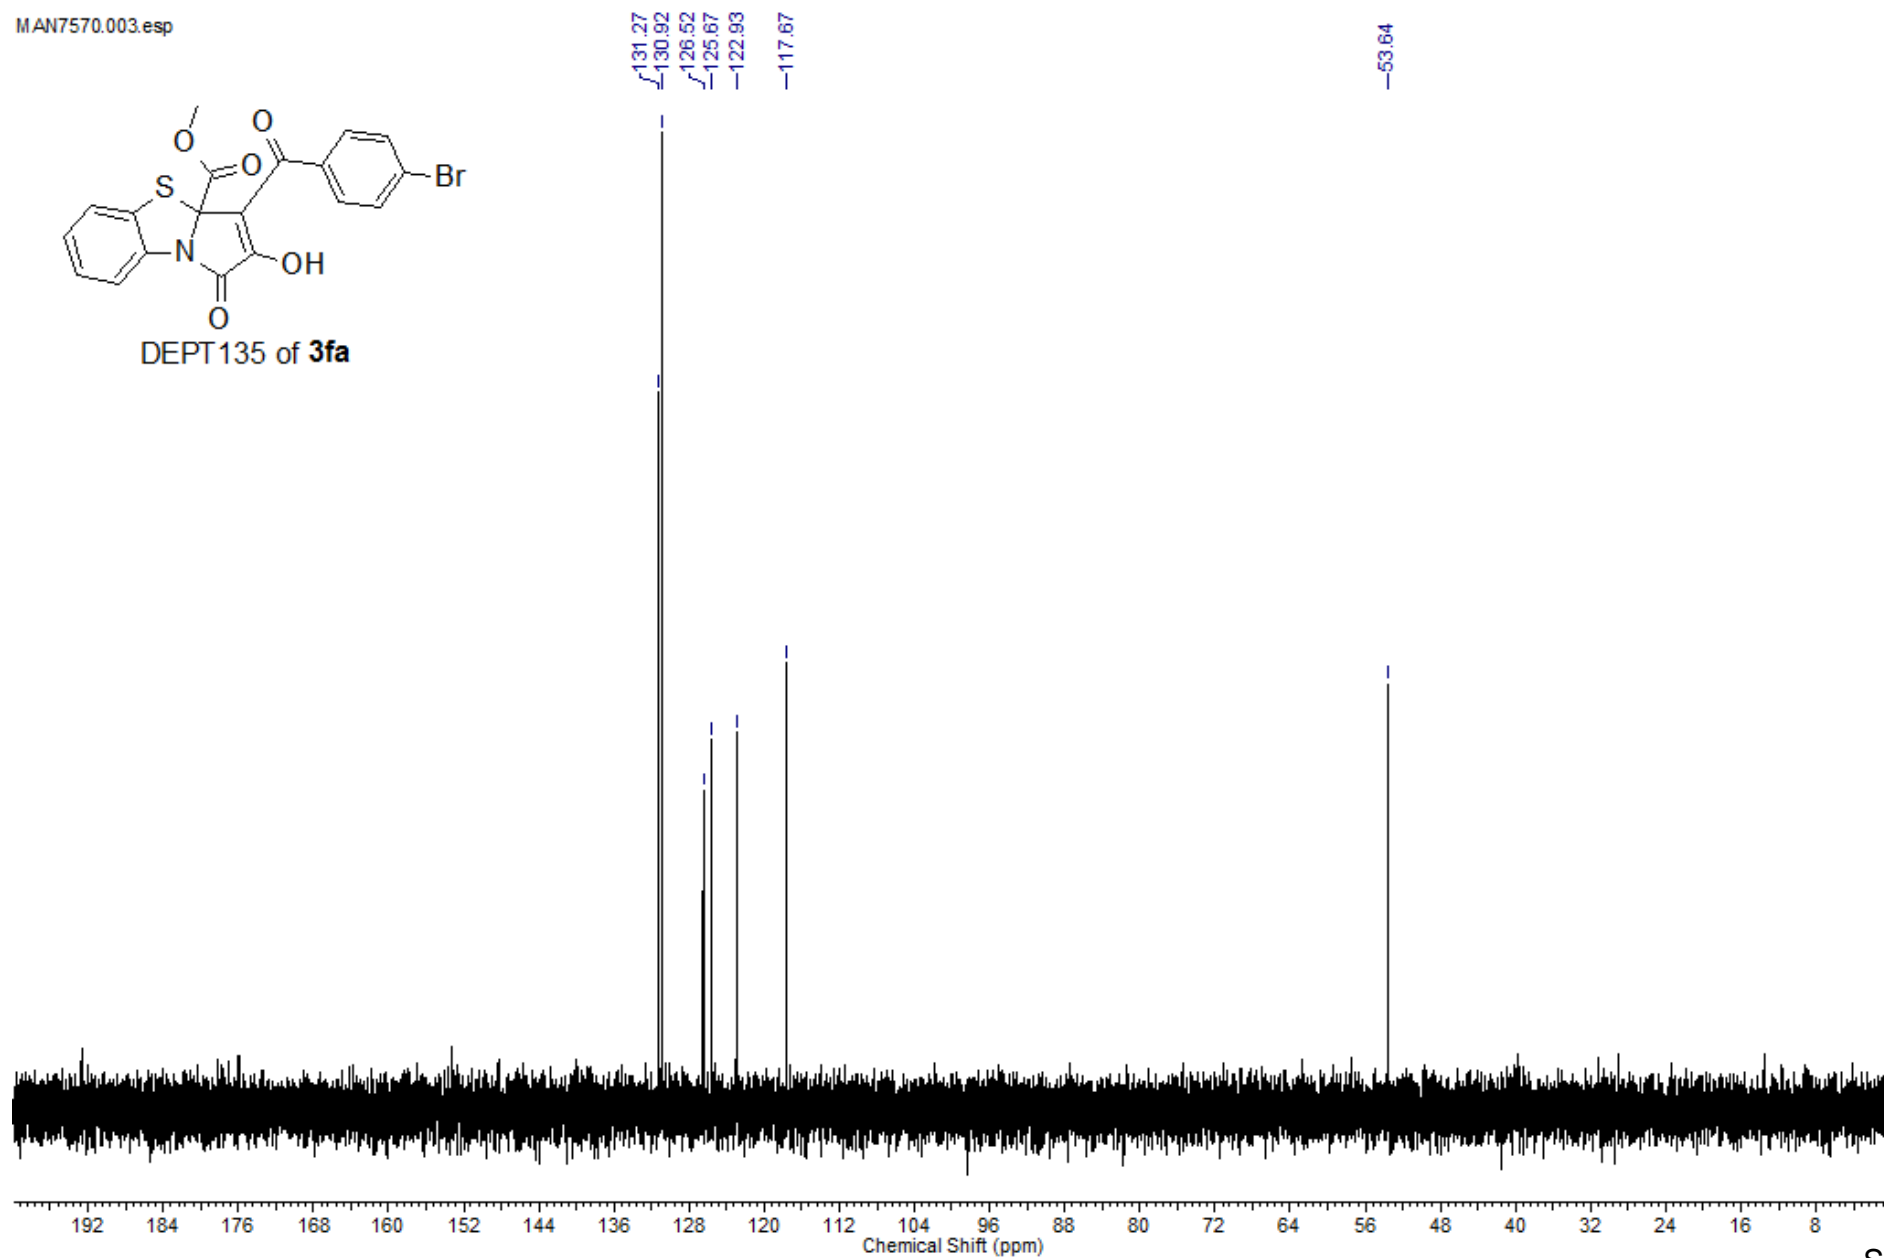

MAN7872.001.esp

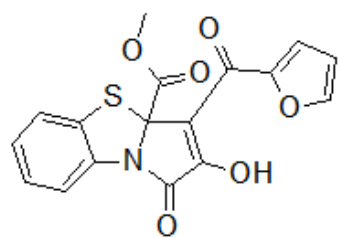

$^1\text{H}$  NMR of **3ga**

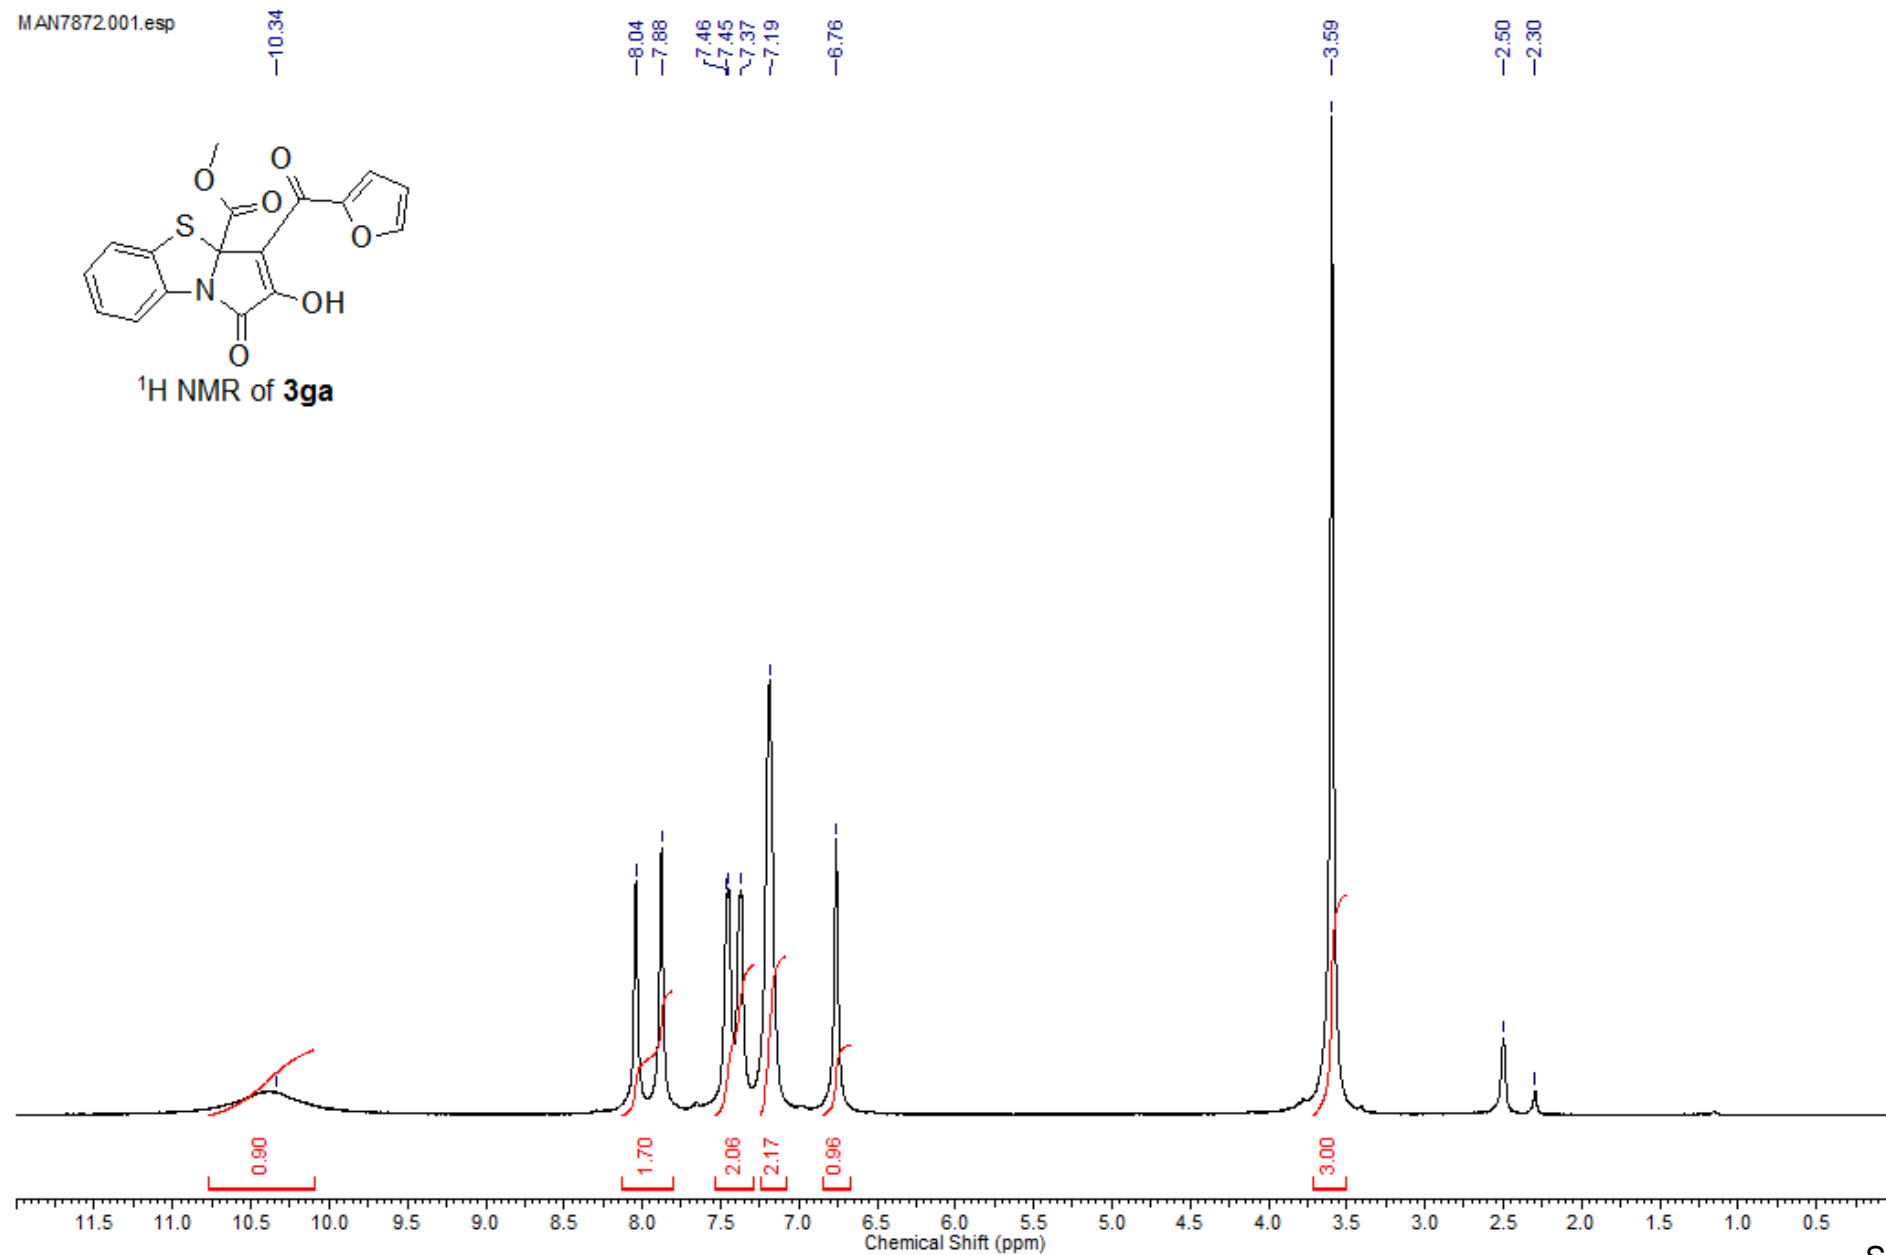

MAN7872.002.esp

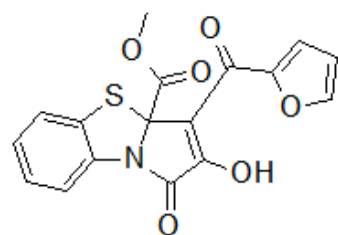

<sup>13</sup>C NMR of **3ga**

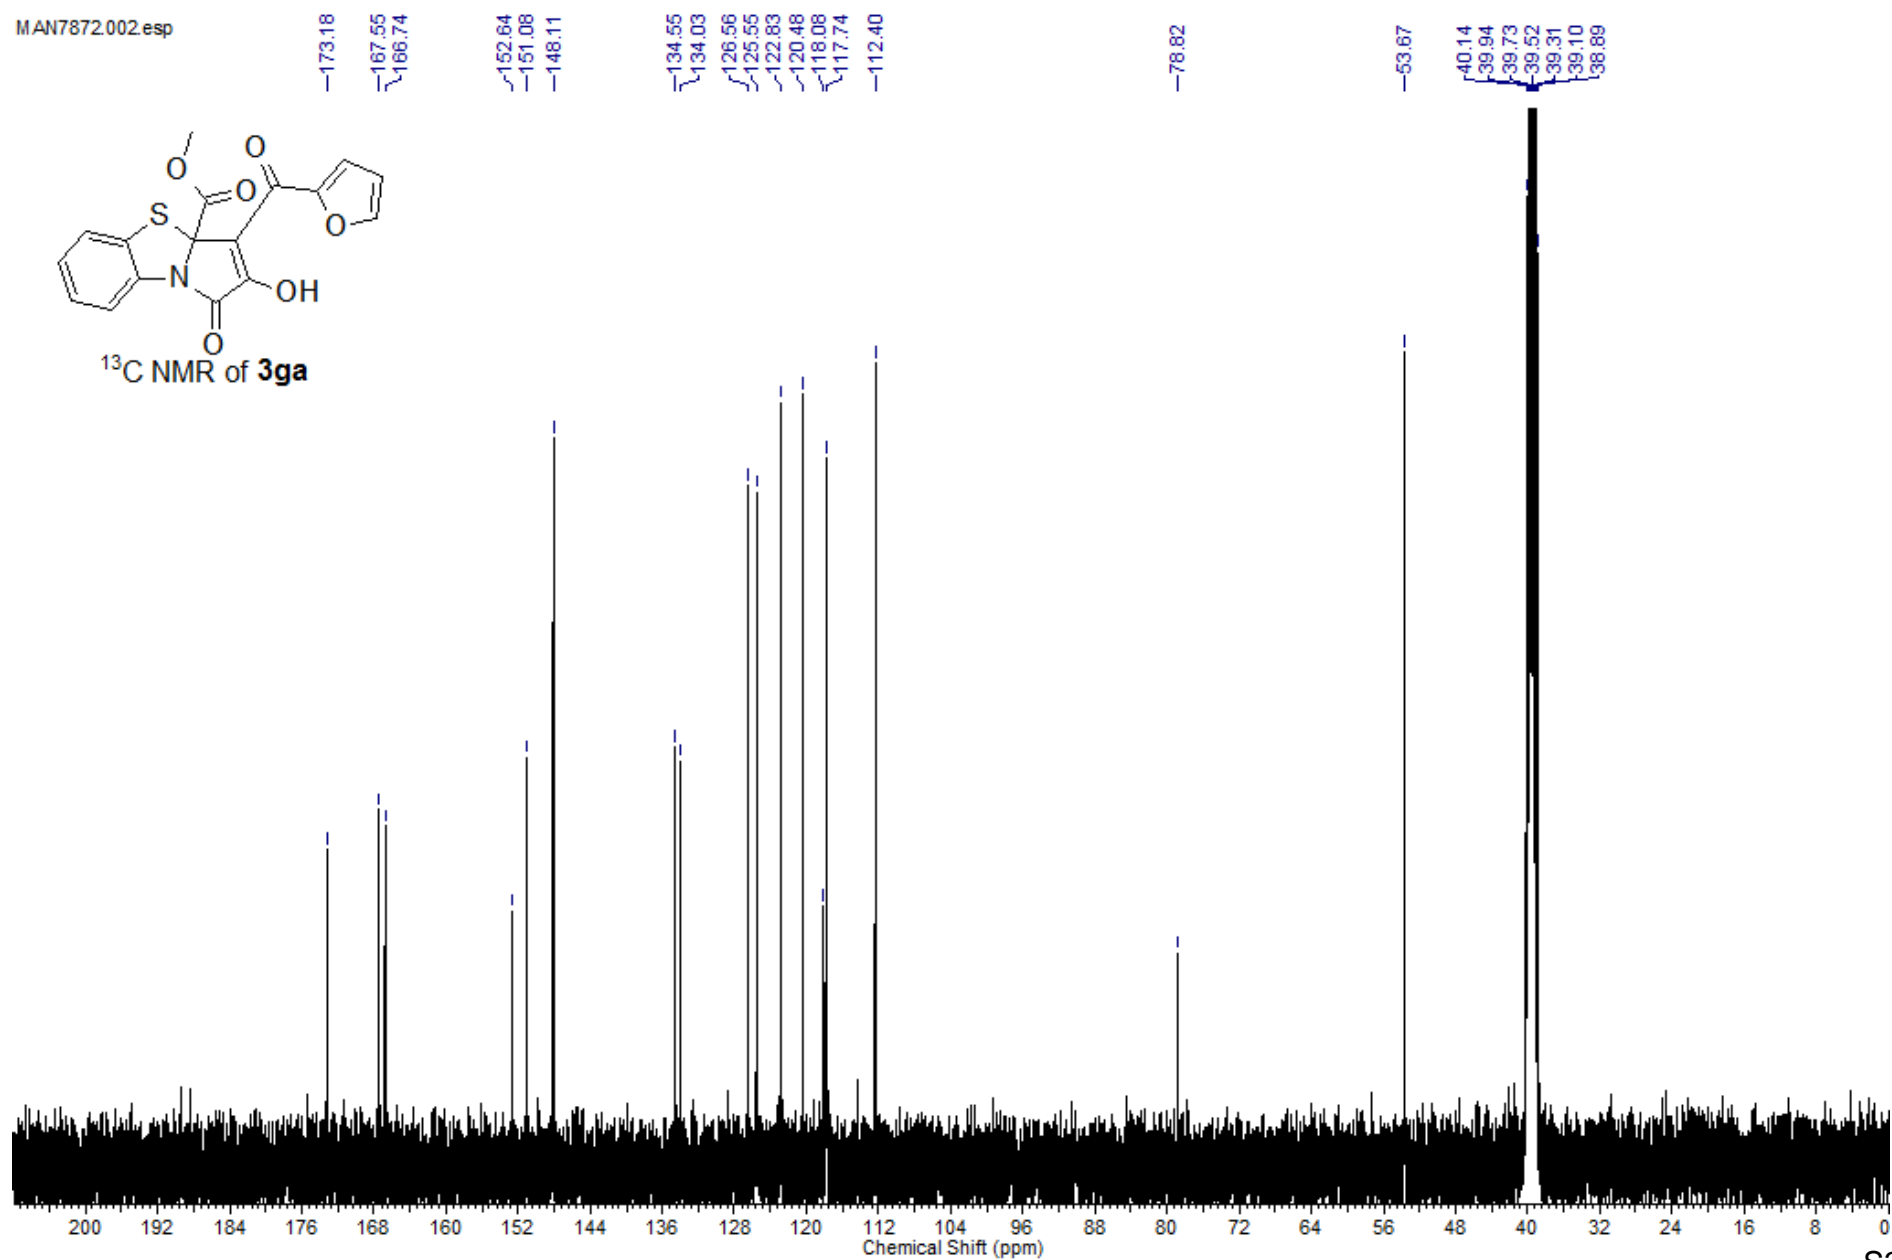

MAN7872.003.esp

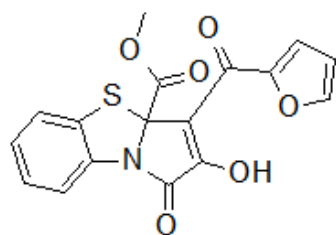

DEPT135 of **3ga**

—148.11

~126.56

~126.54

~122.83

~120.48

~117.74

—112.39

—53.67

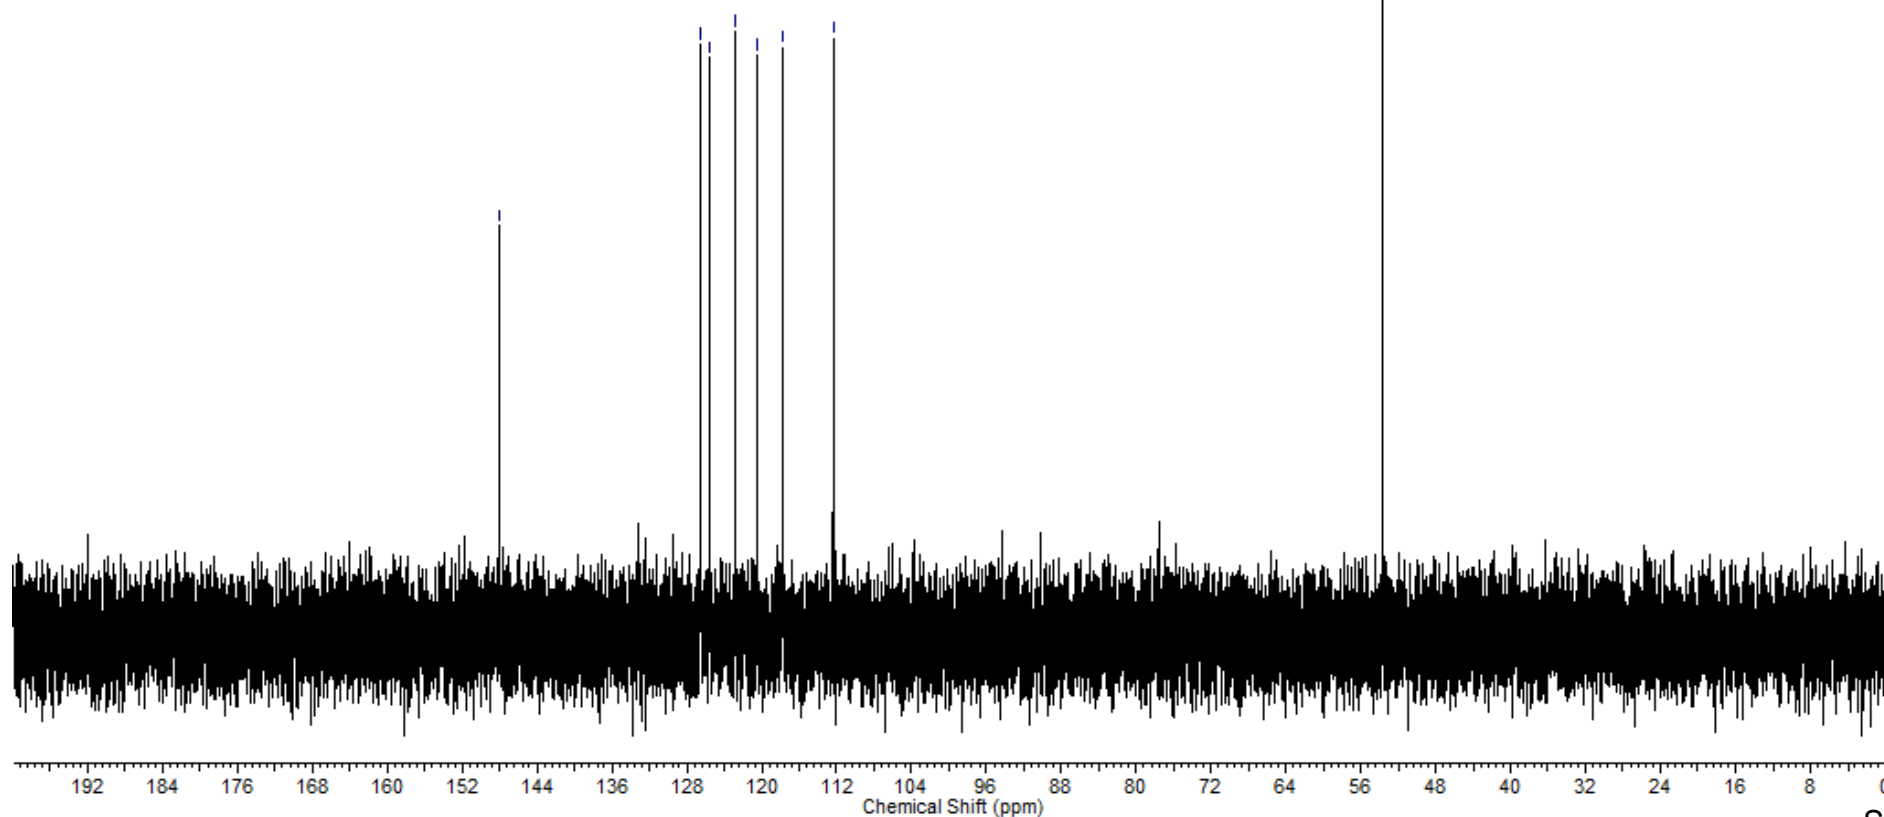

MAN7848.001.esp

-10.63

8.35  
8.34  
8.04  
8.03  
7.47  
7.45  
7.39  
7.37  
7.29  
7.28  
7.21  
7.19  
7.18

3.59

2.50  
2.30  
2.21

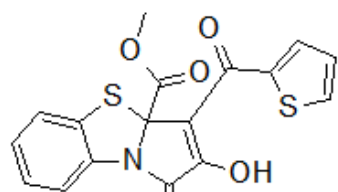

<sup>1</sup>H NMR of **3ha**

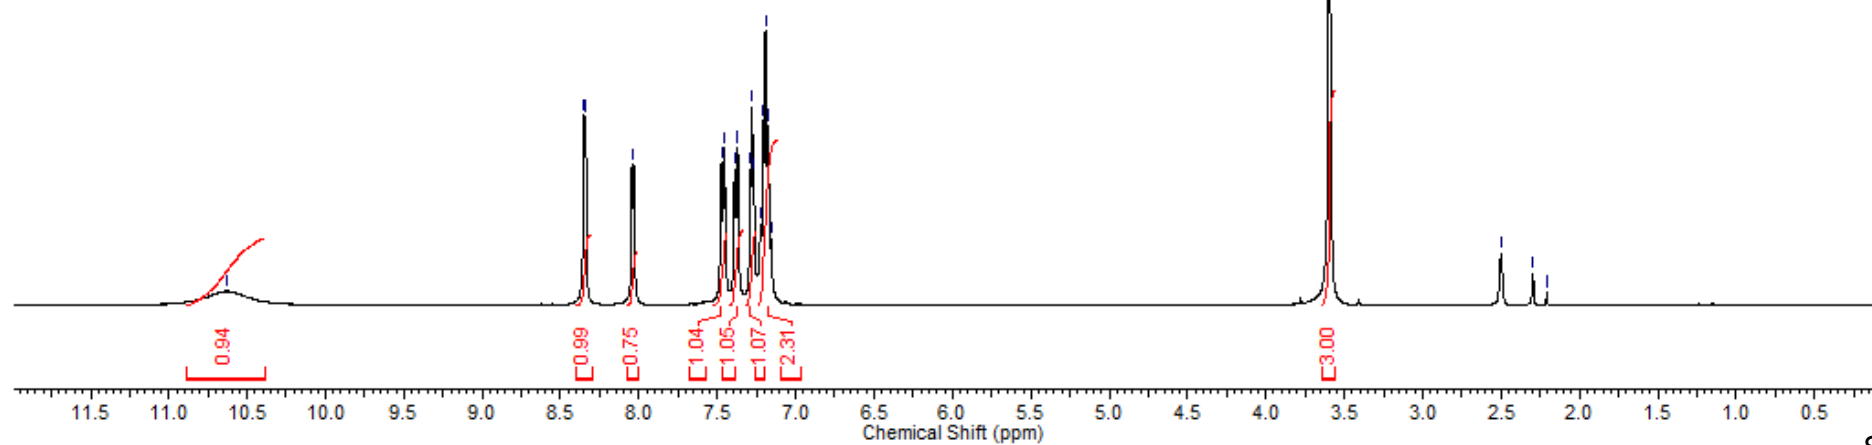



MAN7848.002.esp

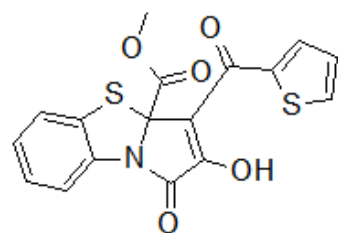

<sup>13</sup>C NMR of **3ha**

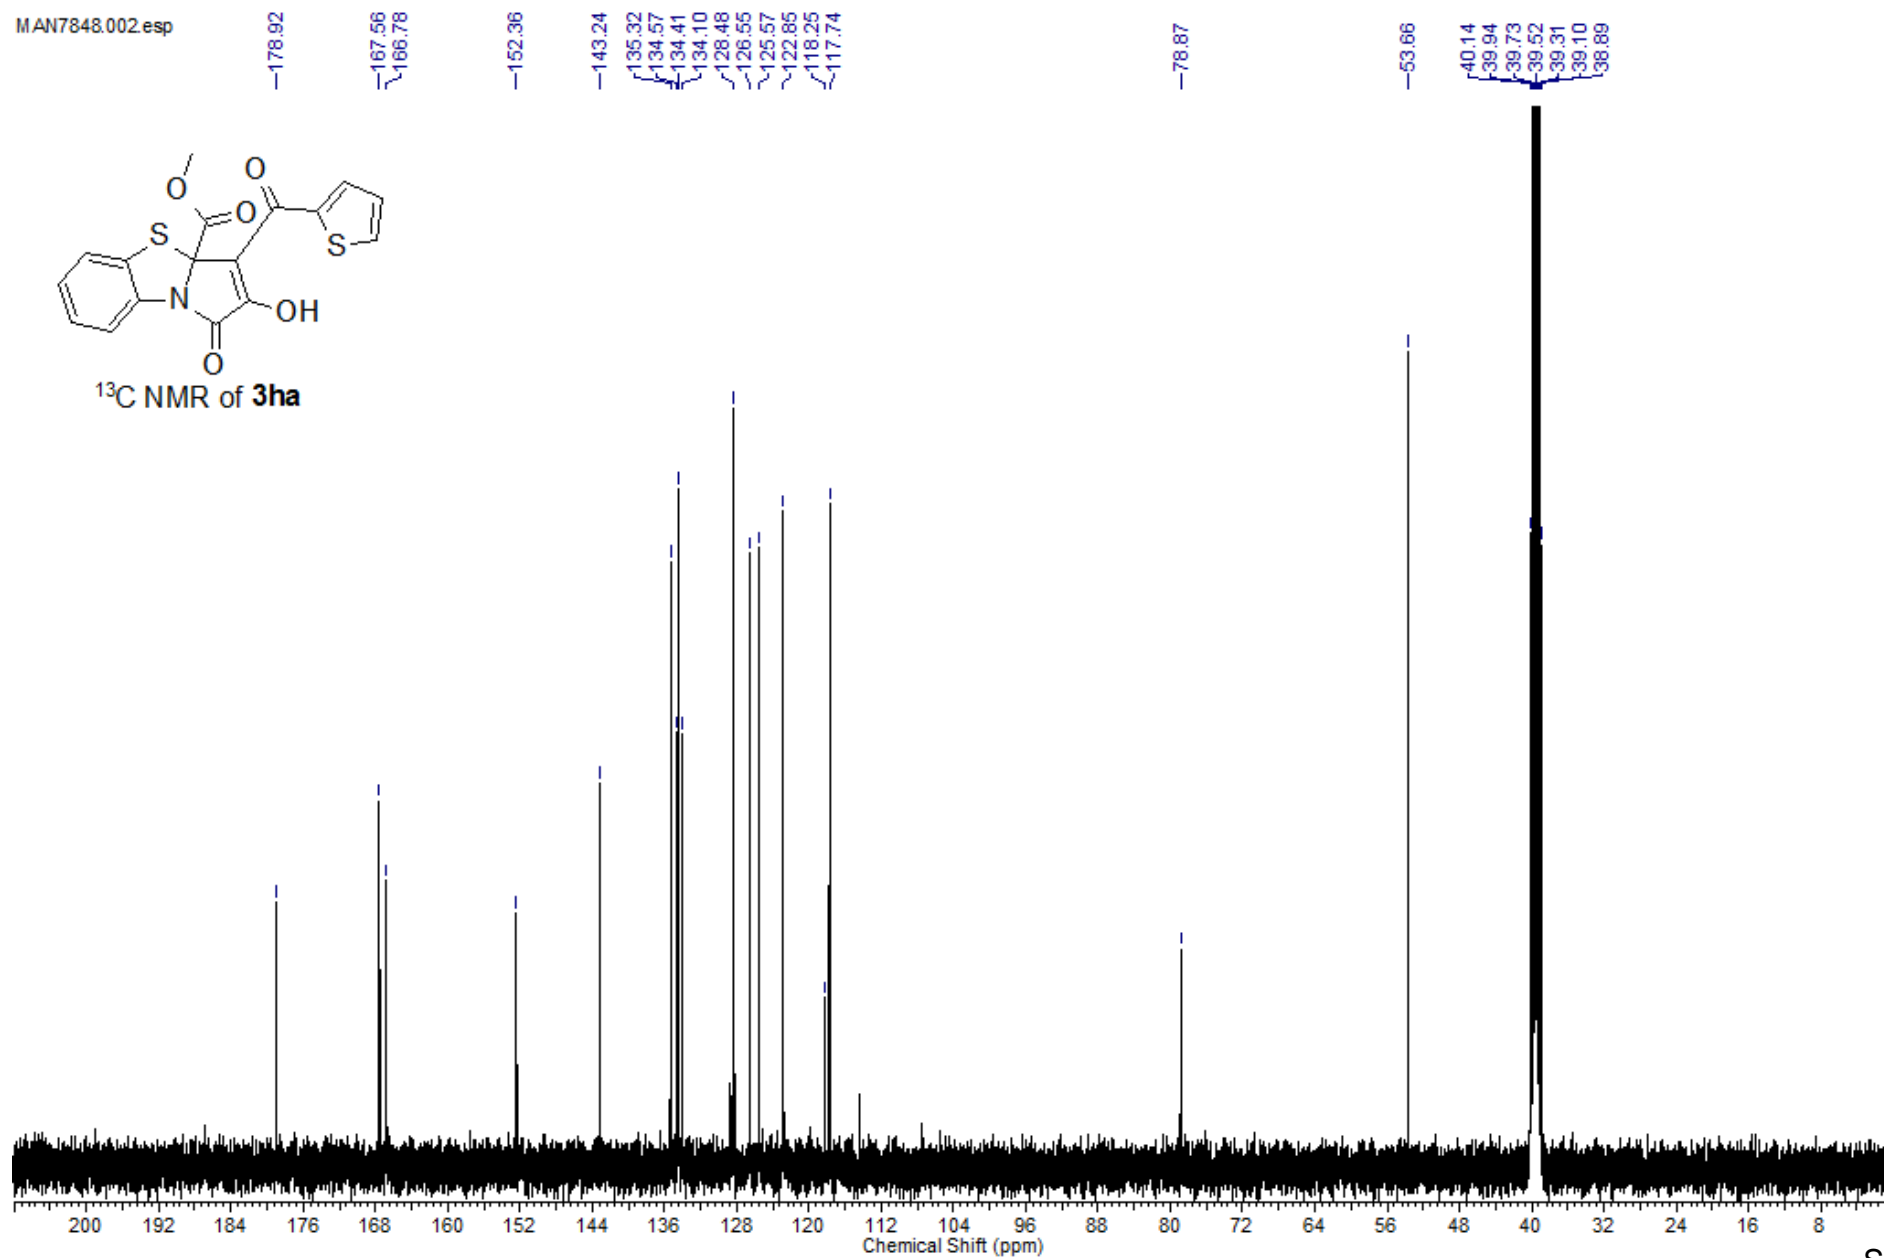

MAN7848.003.esp

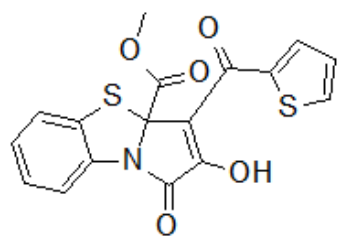

DEPT135 of **3ha**

135.32  
134.41  
128.48  
126.55  
125.57  
122.86  
117.74

53.66

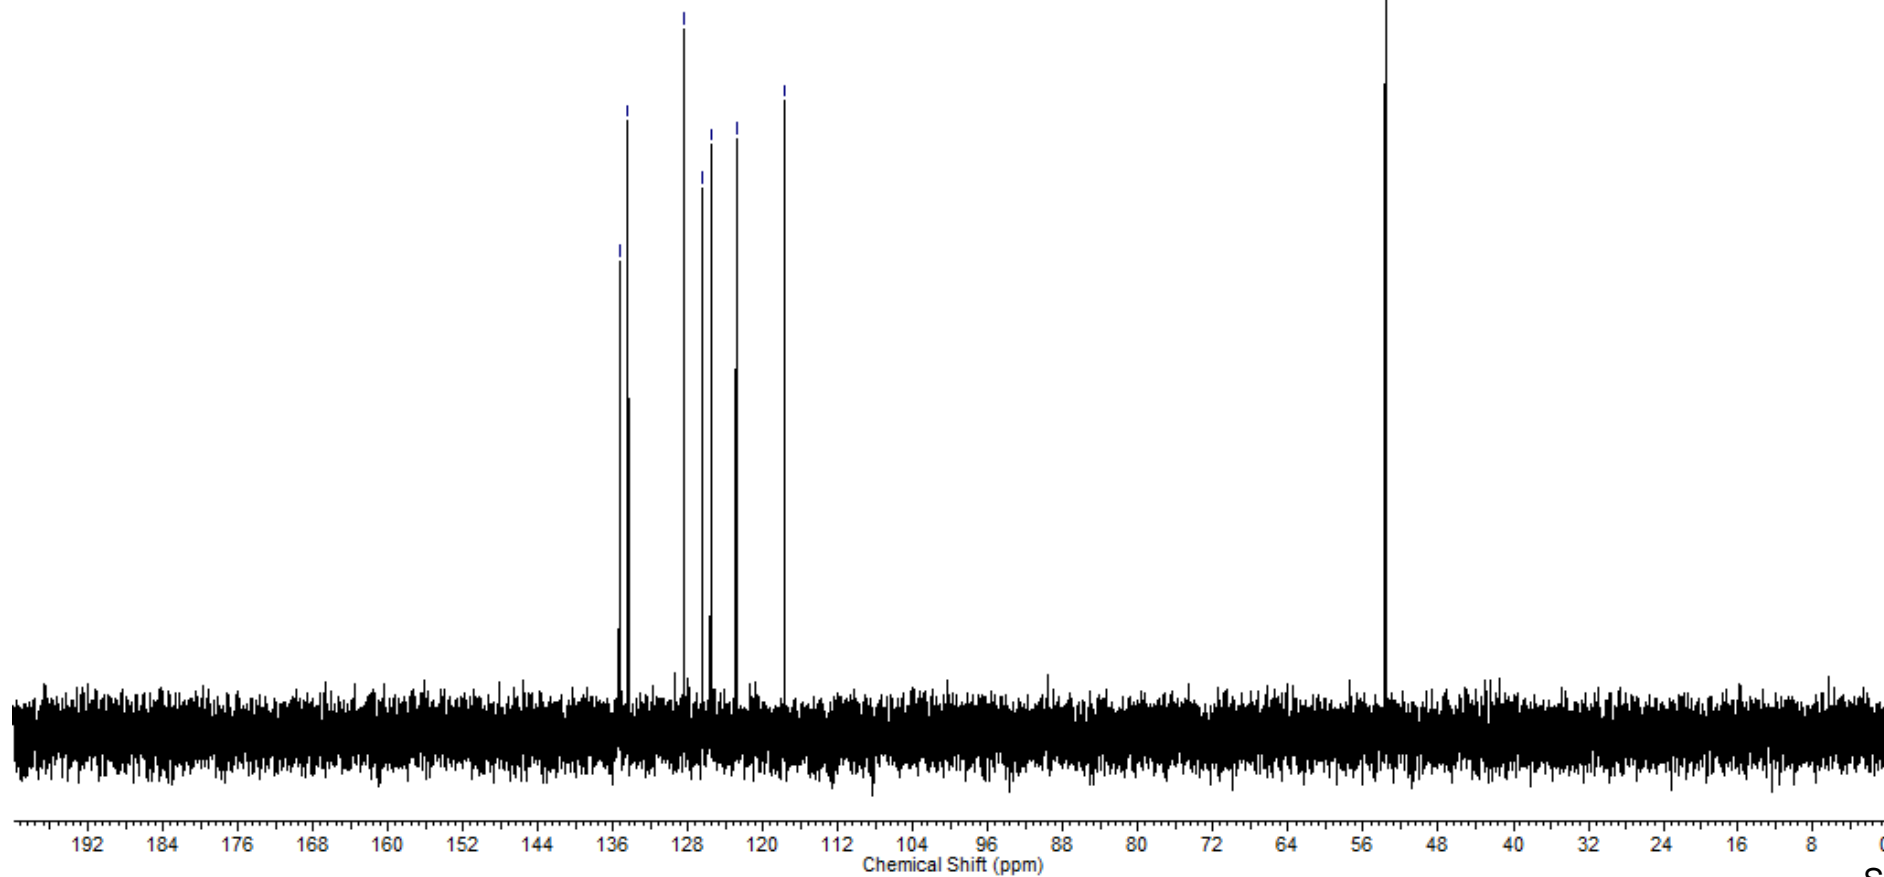

MAN7326.001.esp

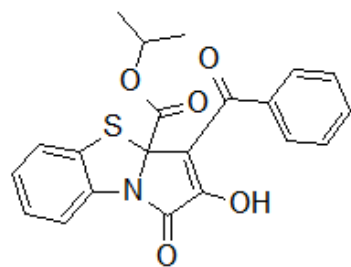

<sup>1</sup>H NMR of **3ab**

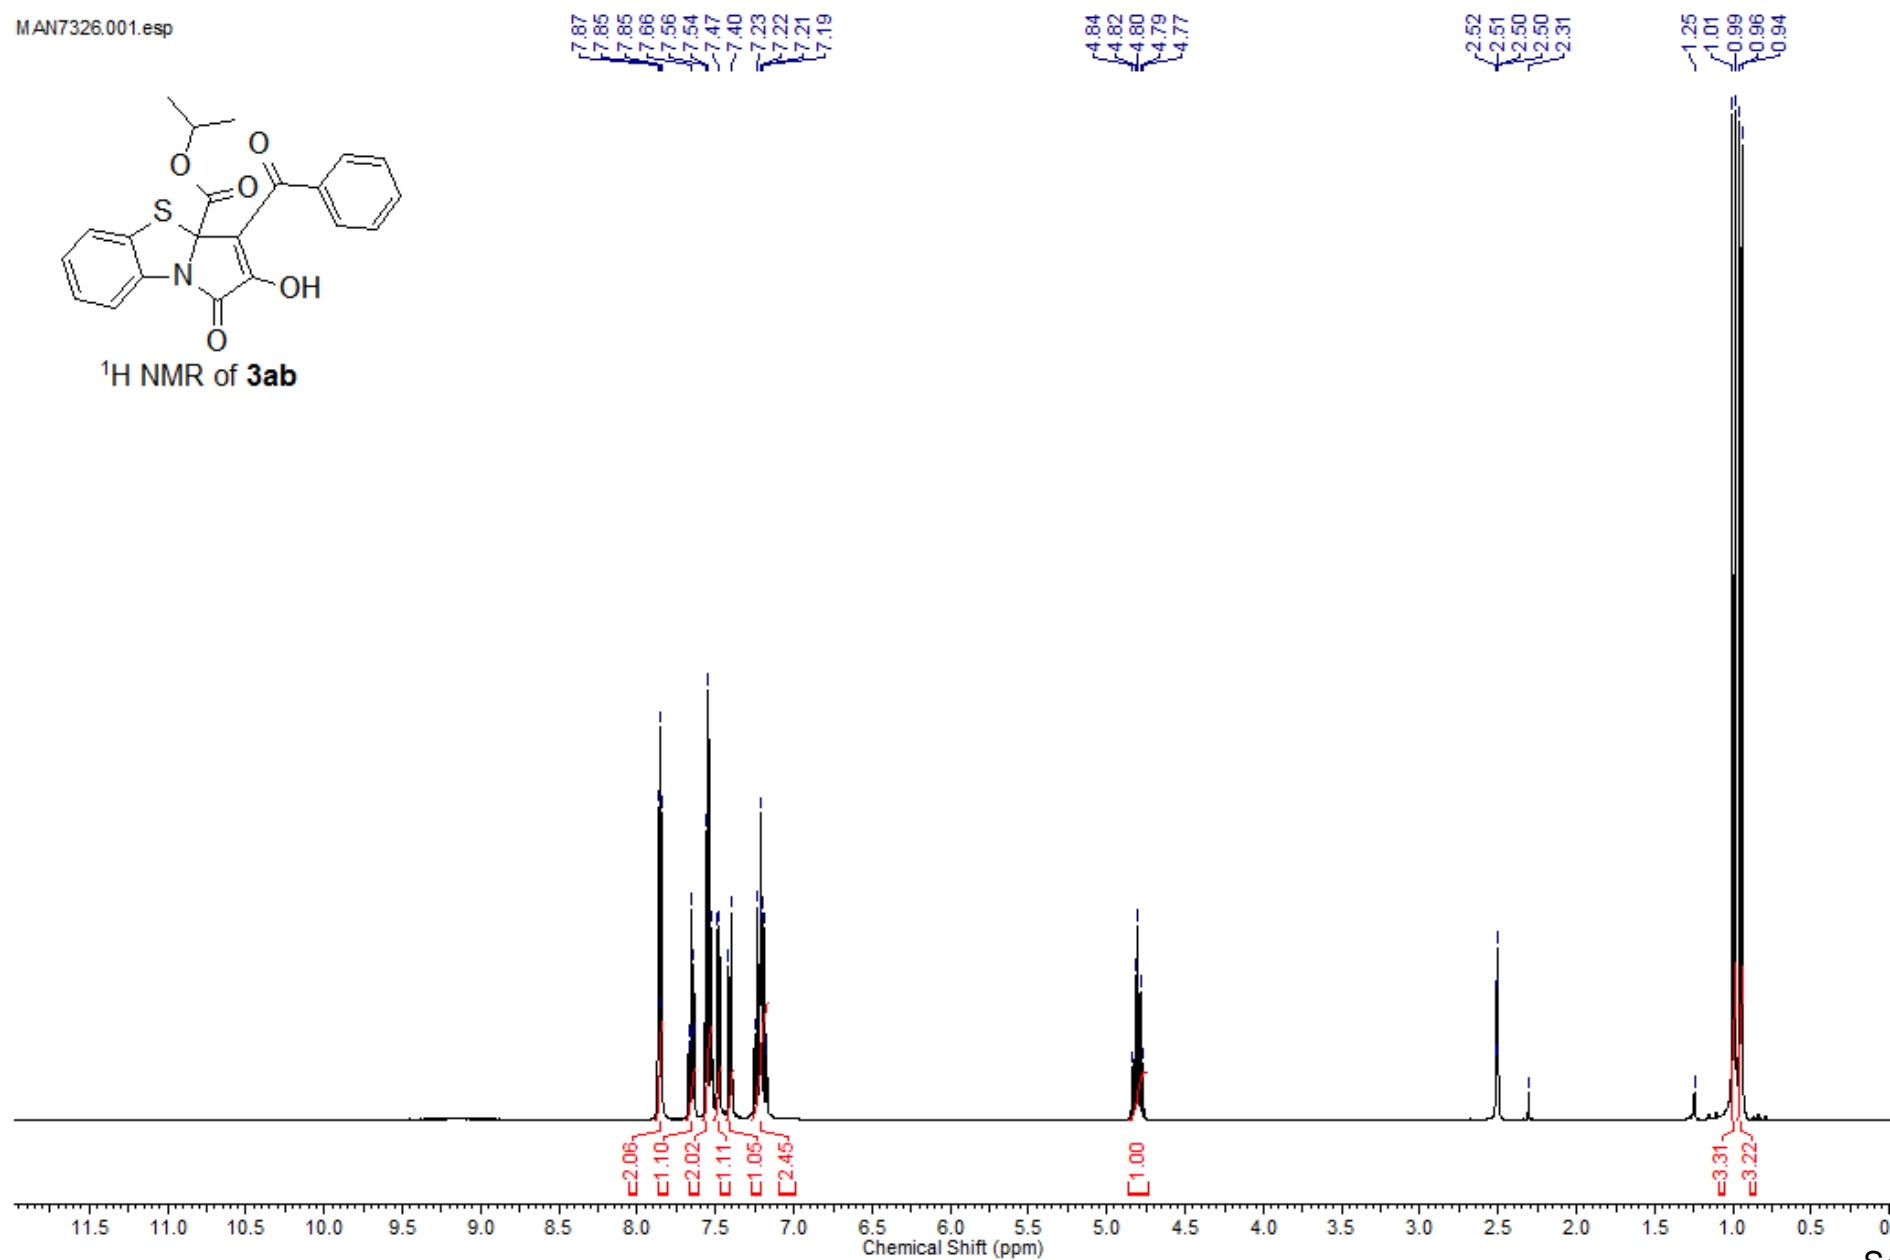

MAN7326.032 esp

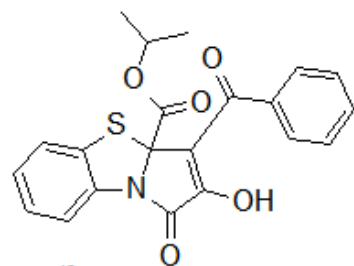

<sup>13</sup>C NMR of **3ab**

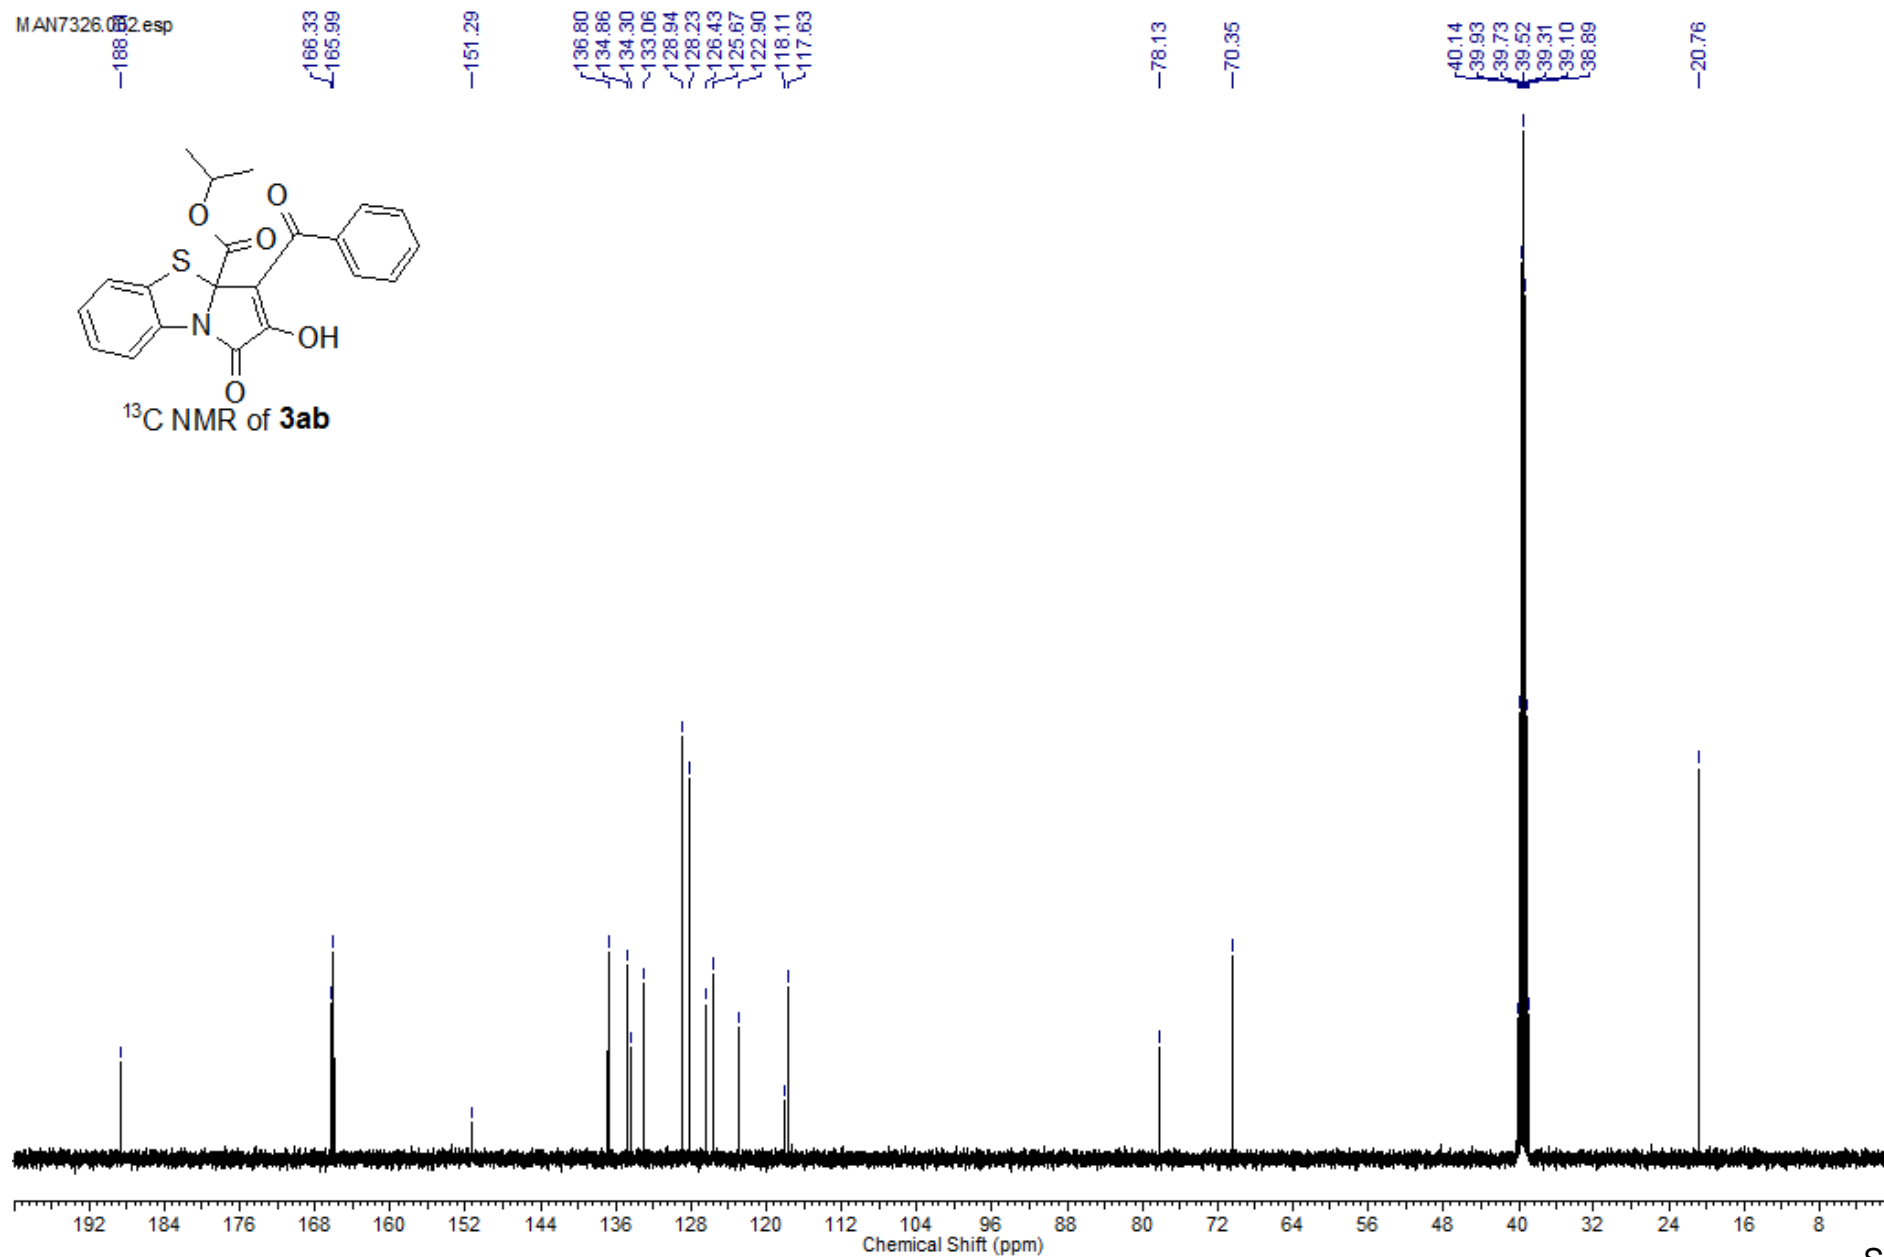

MAN7326.003.esp

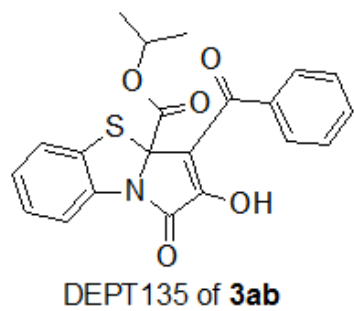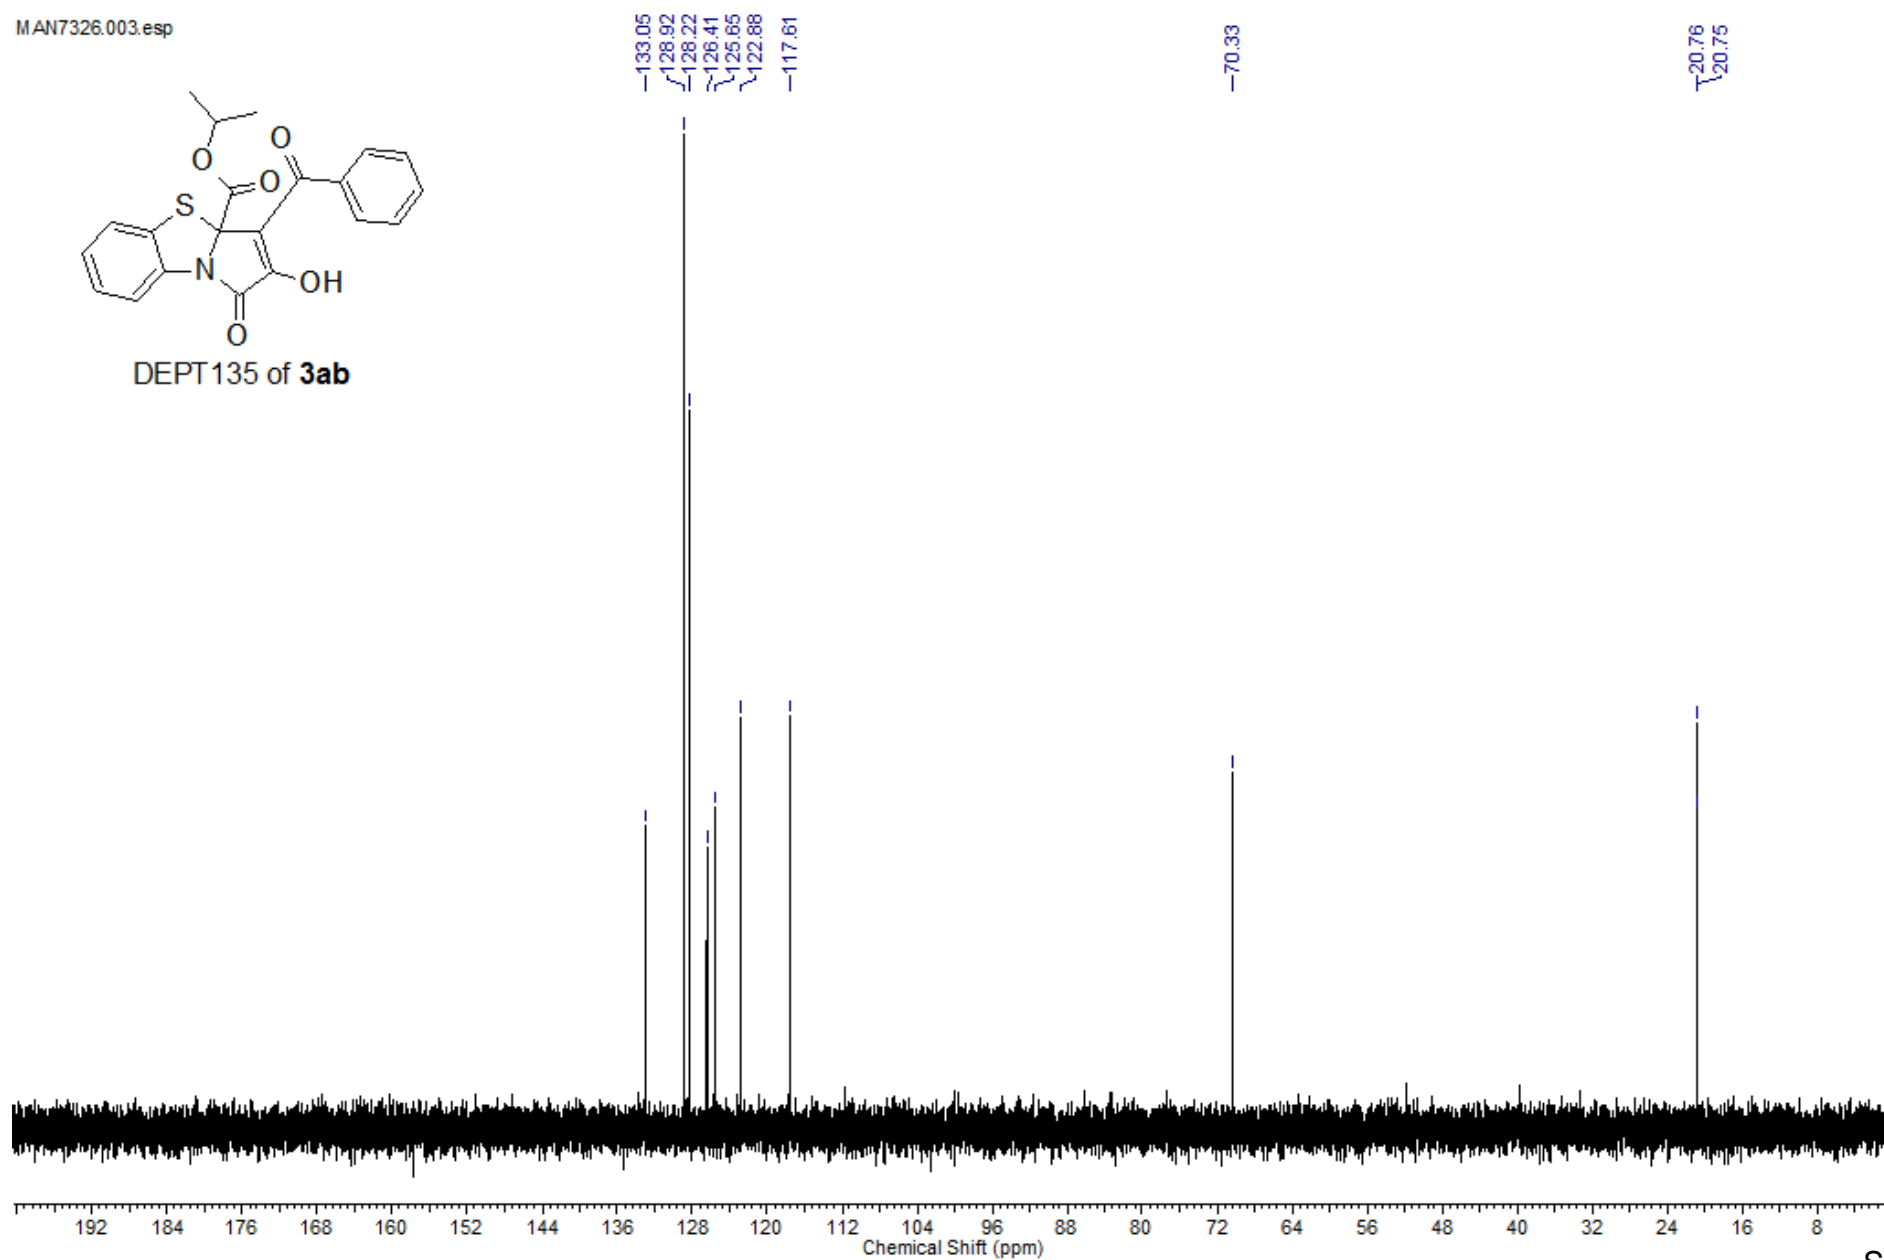

MAN7327.001.esp

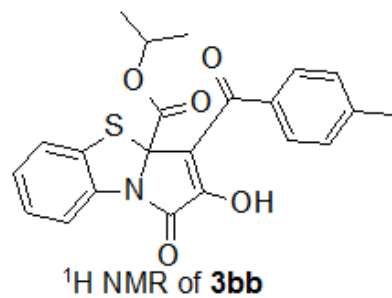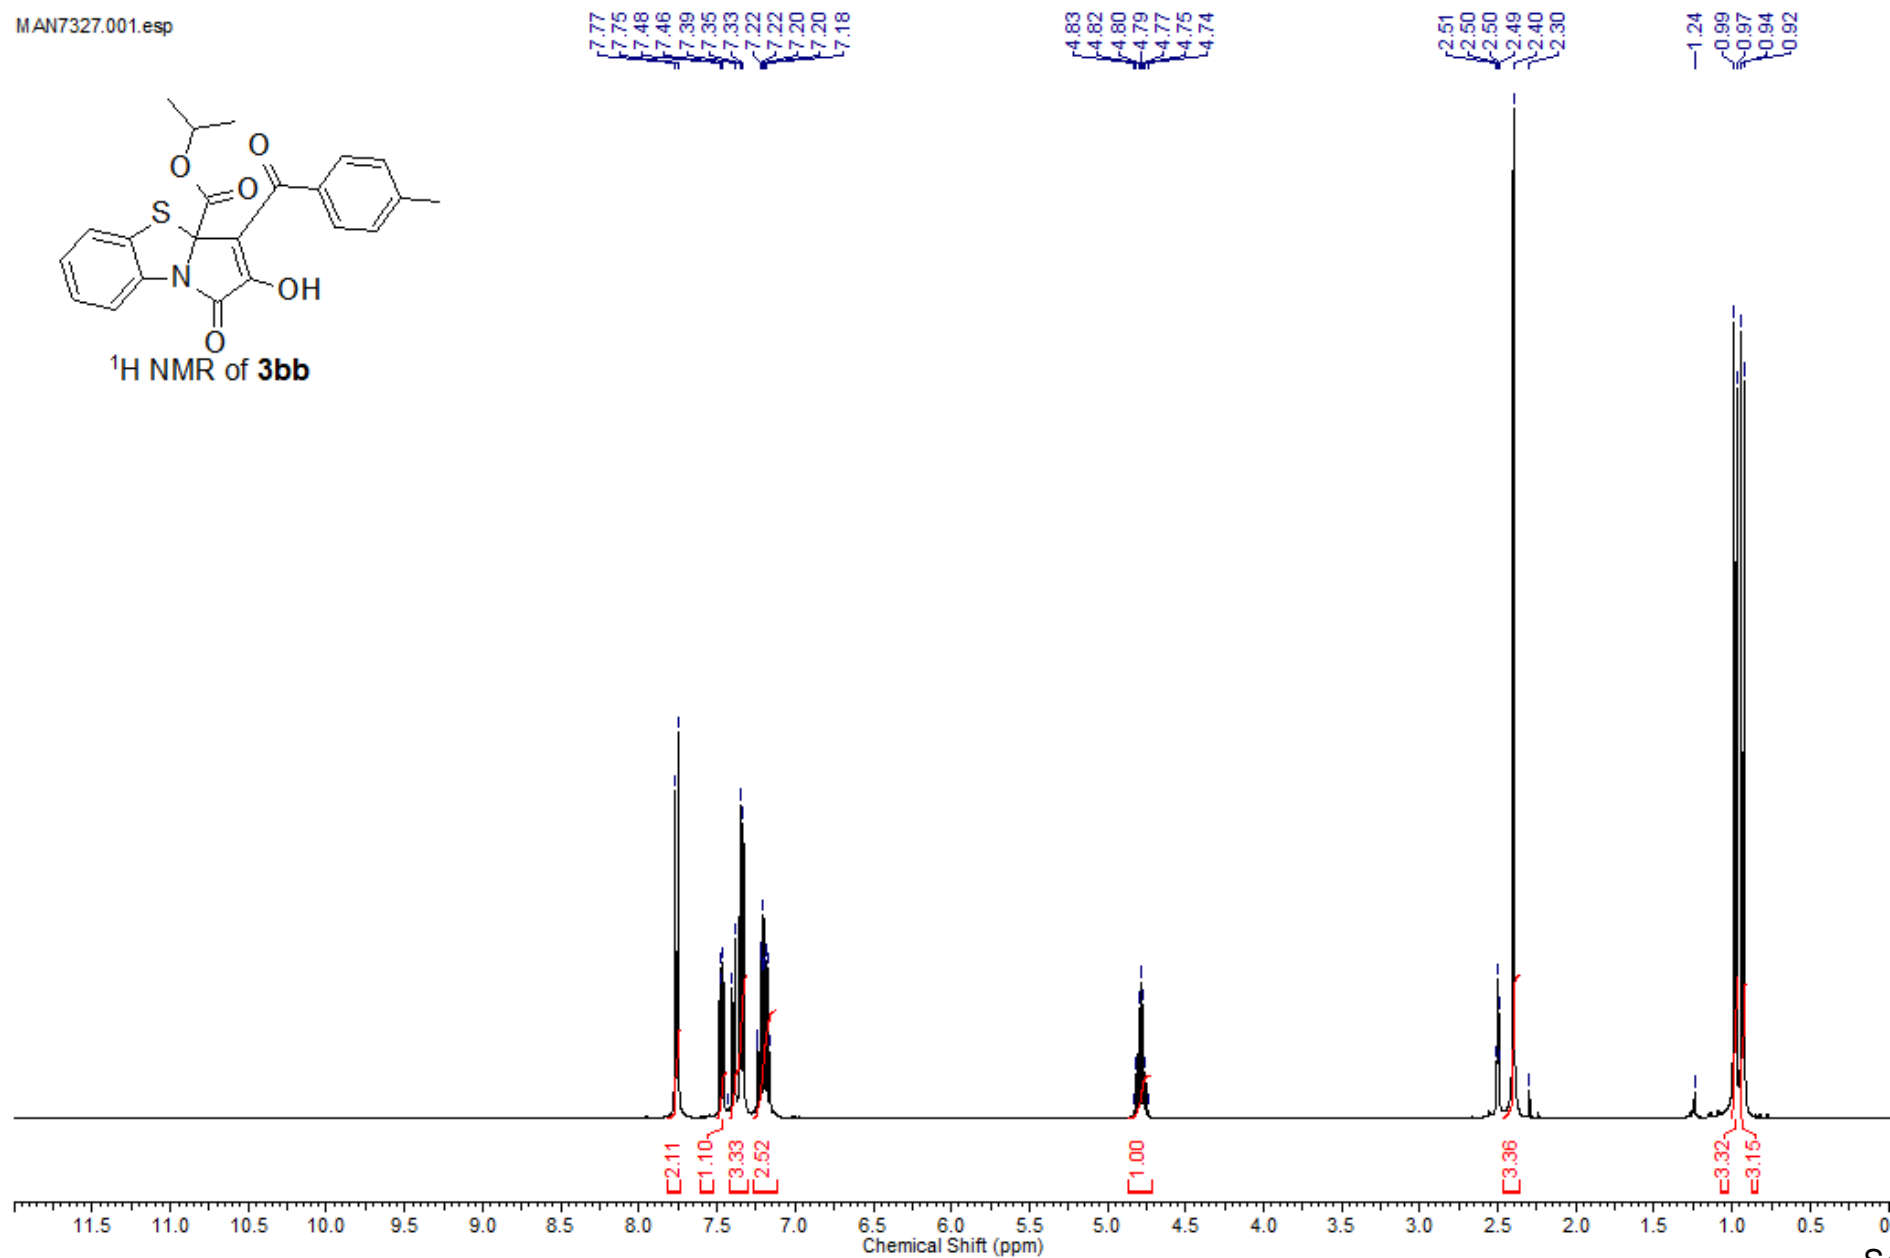

MAN7327.002.esp

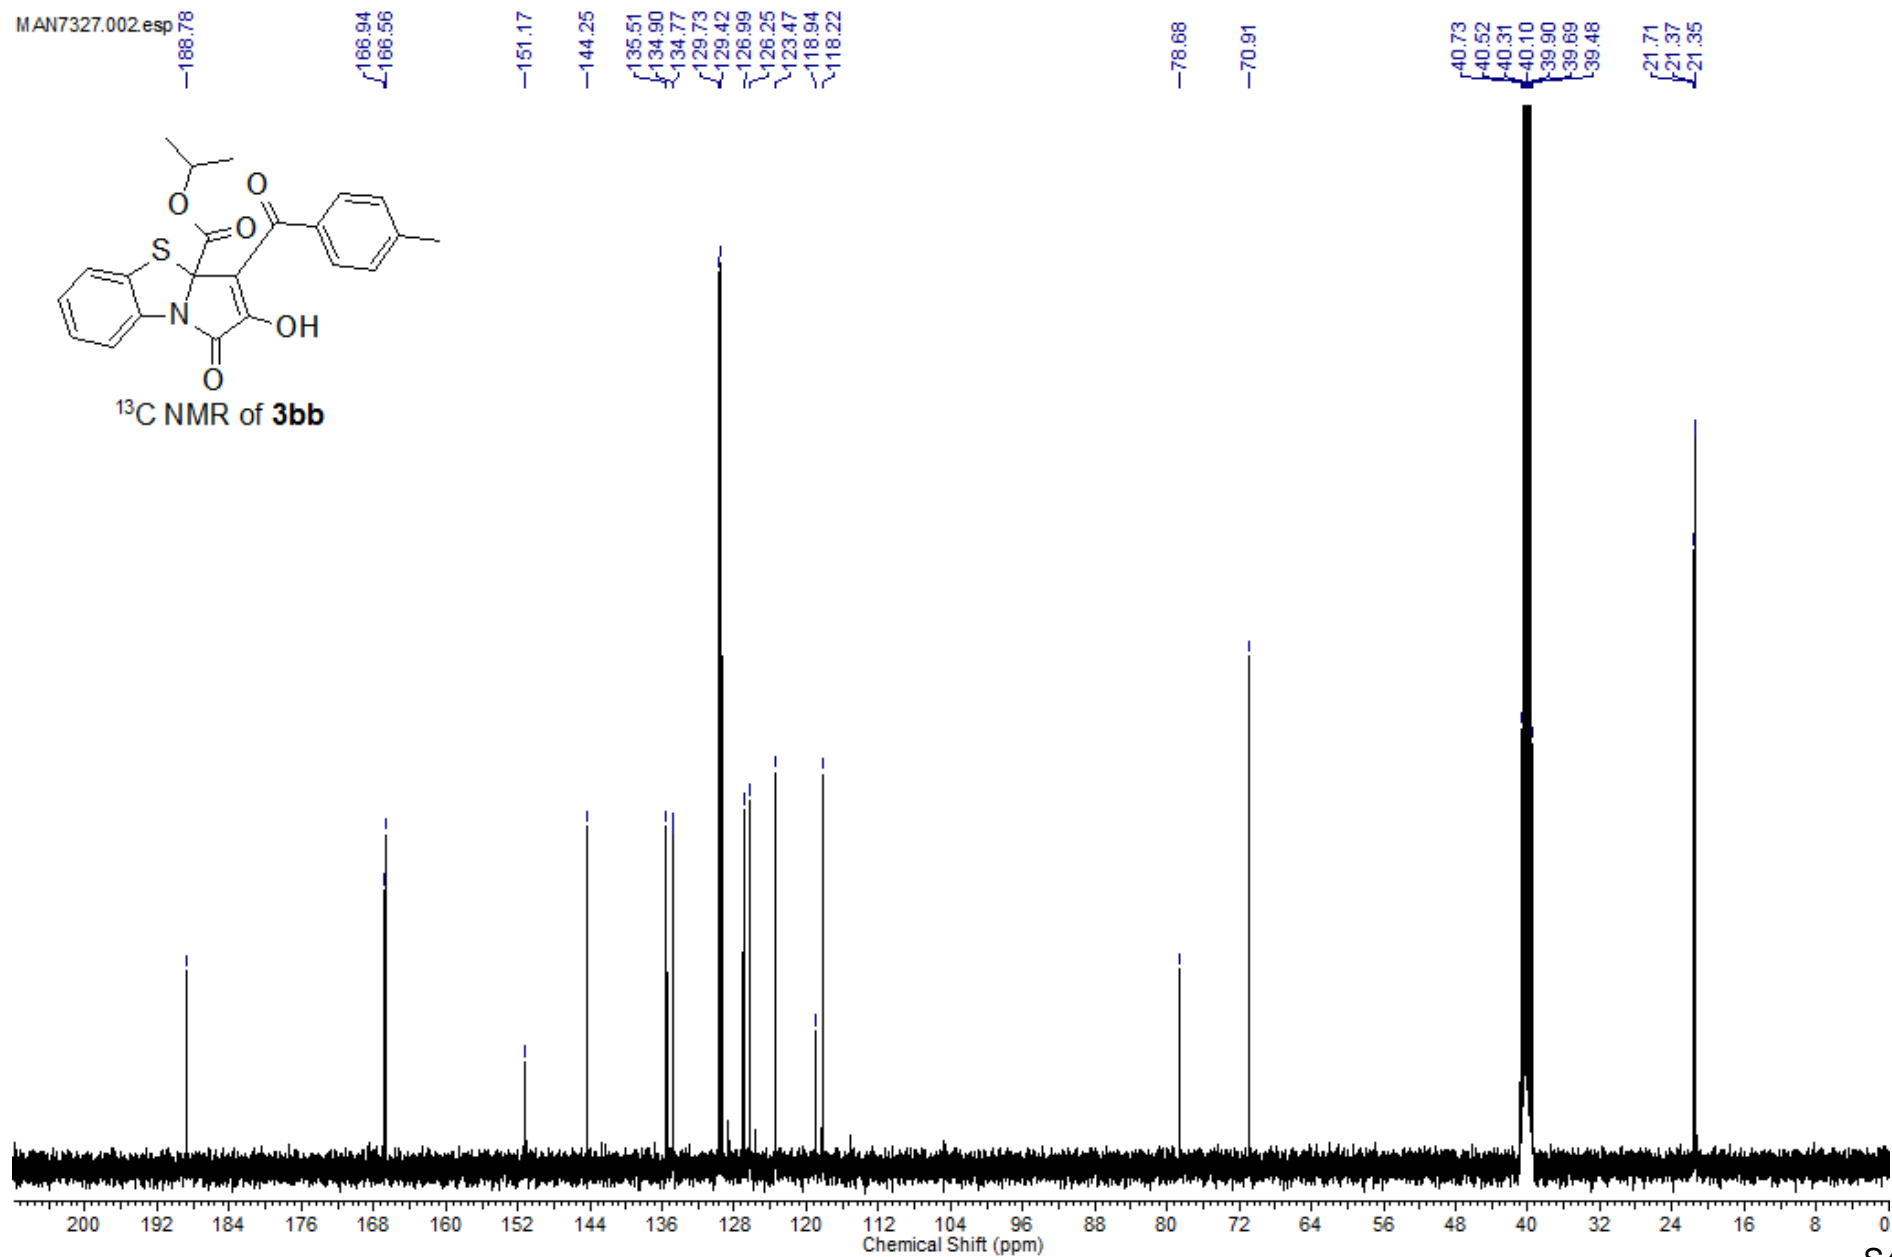

MAN7327.003.esp

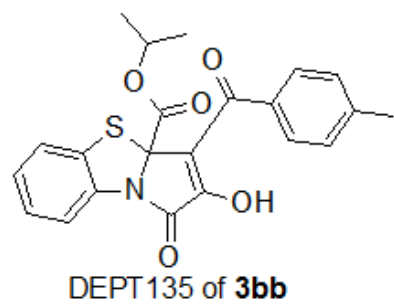

129.71  
129.39  
126.97  
123.45  
118.20

70.89

21.89  
21.35

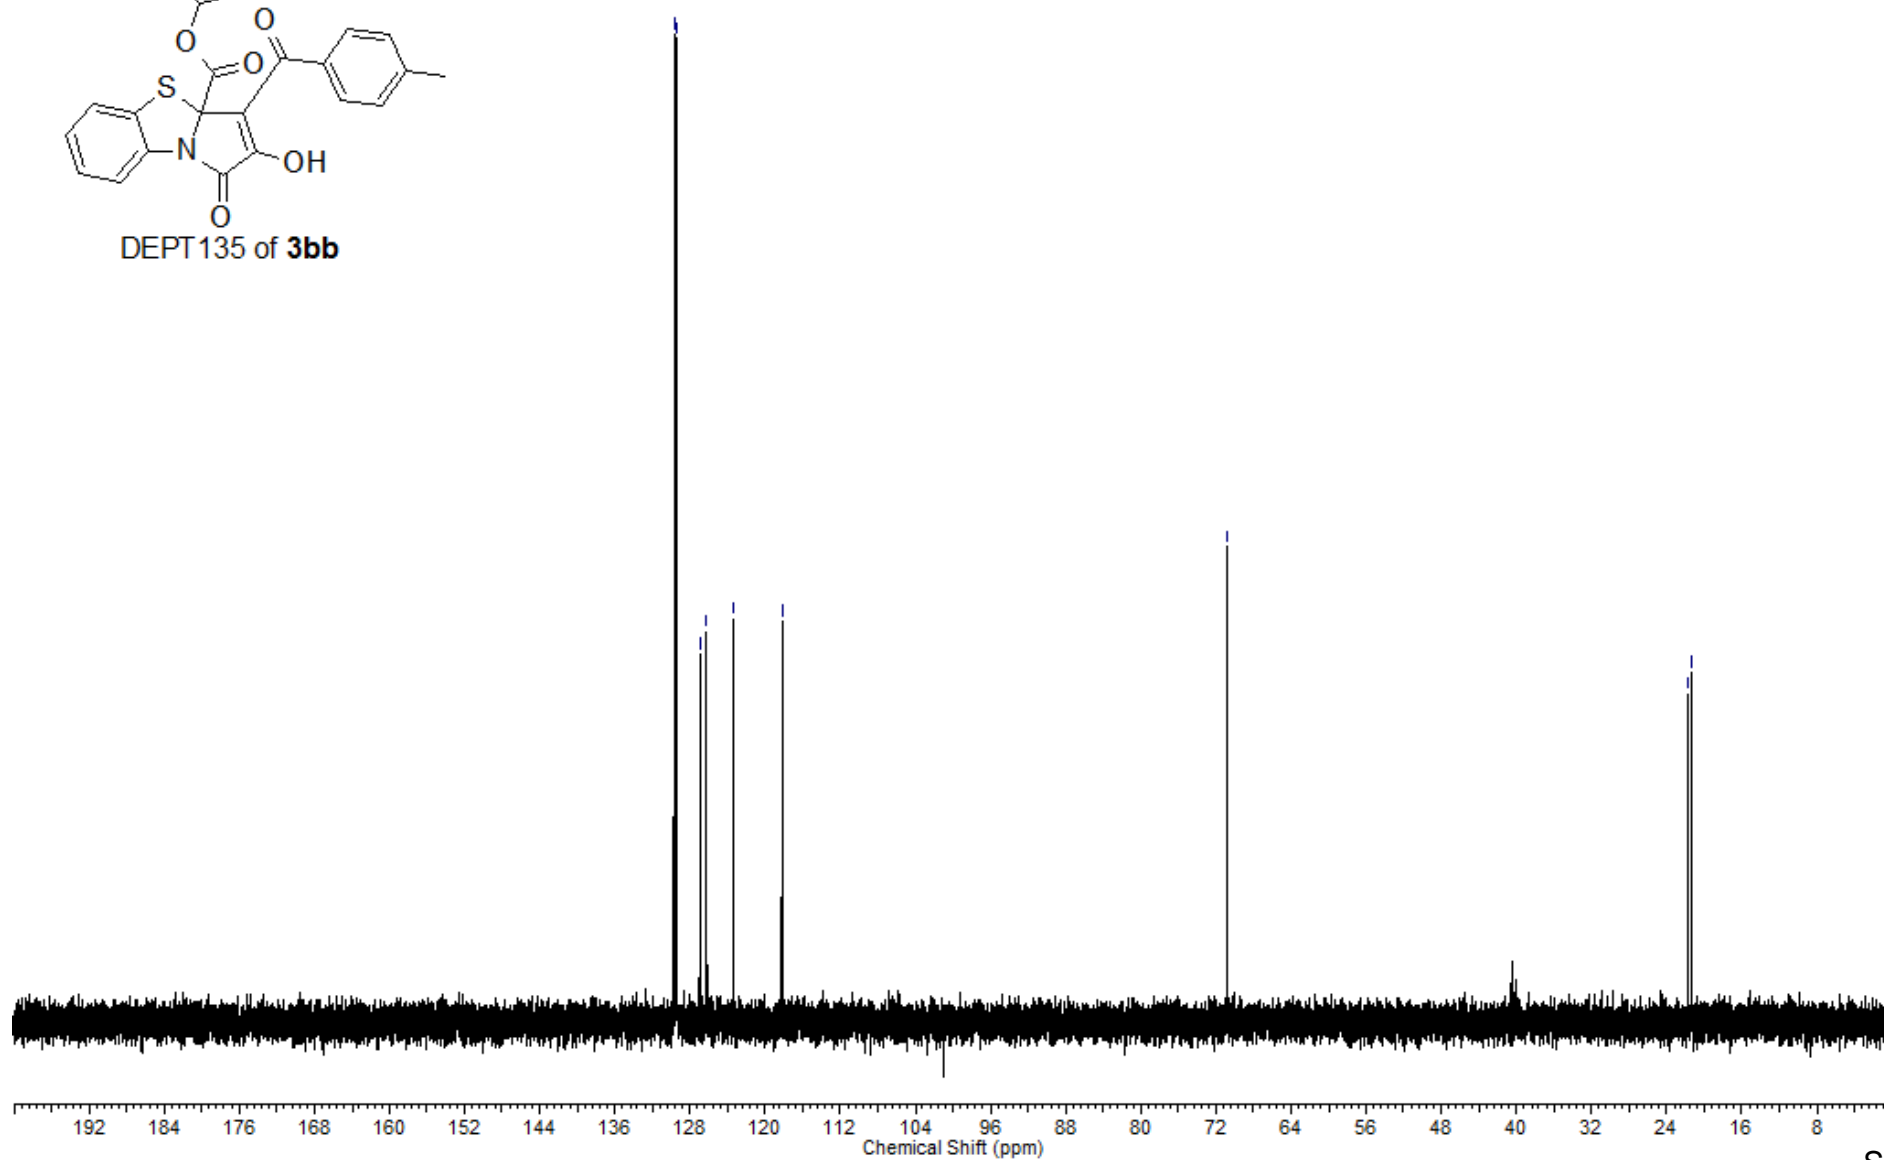



MAN7809.001.esp

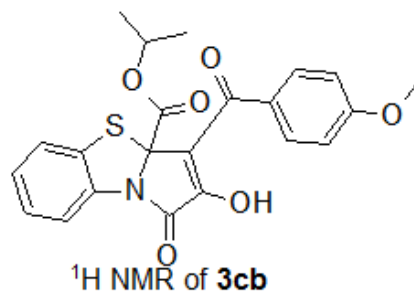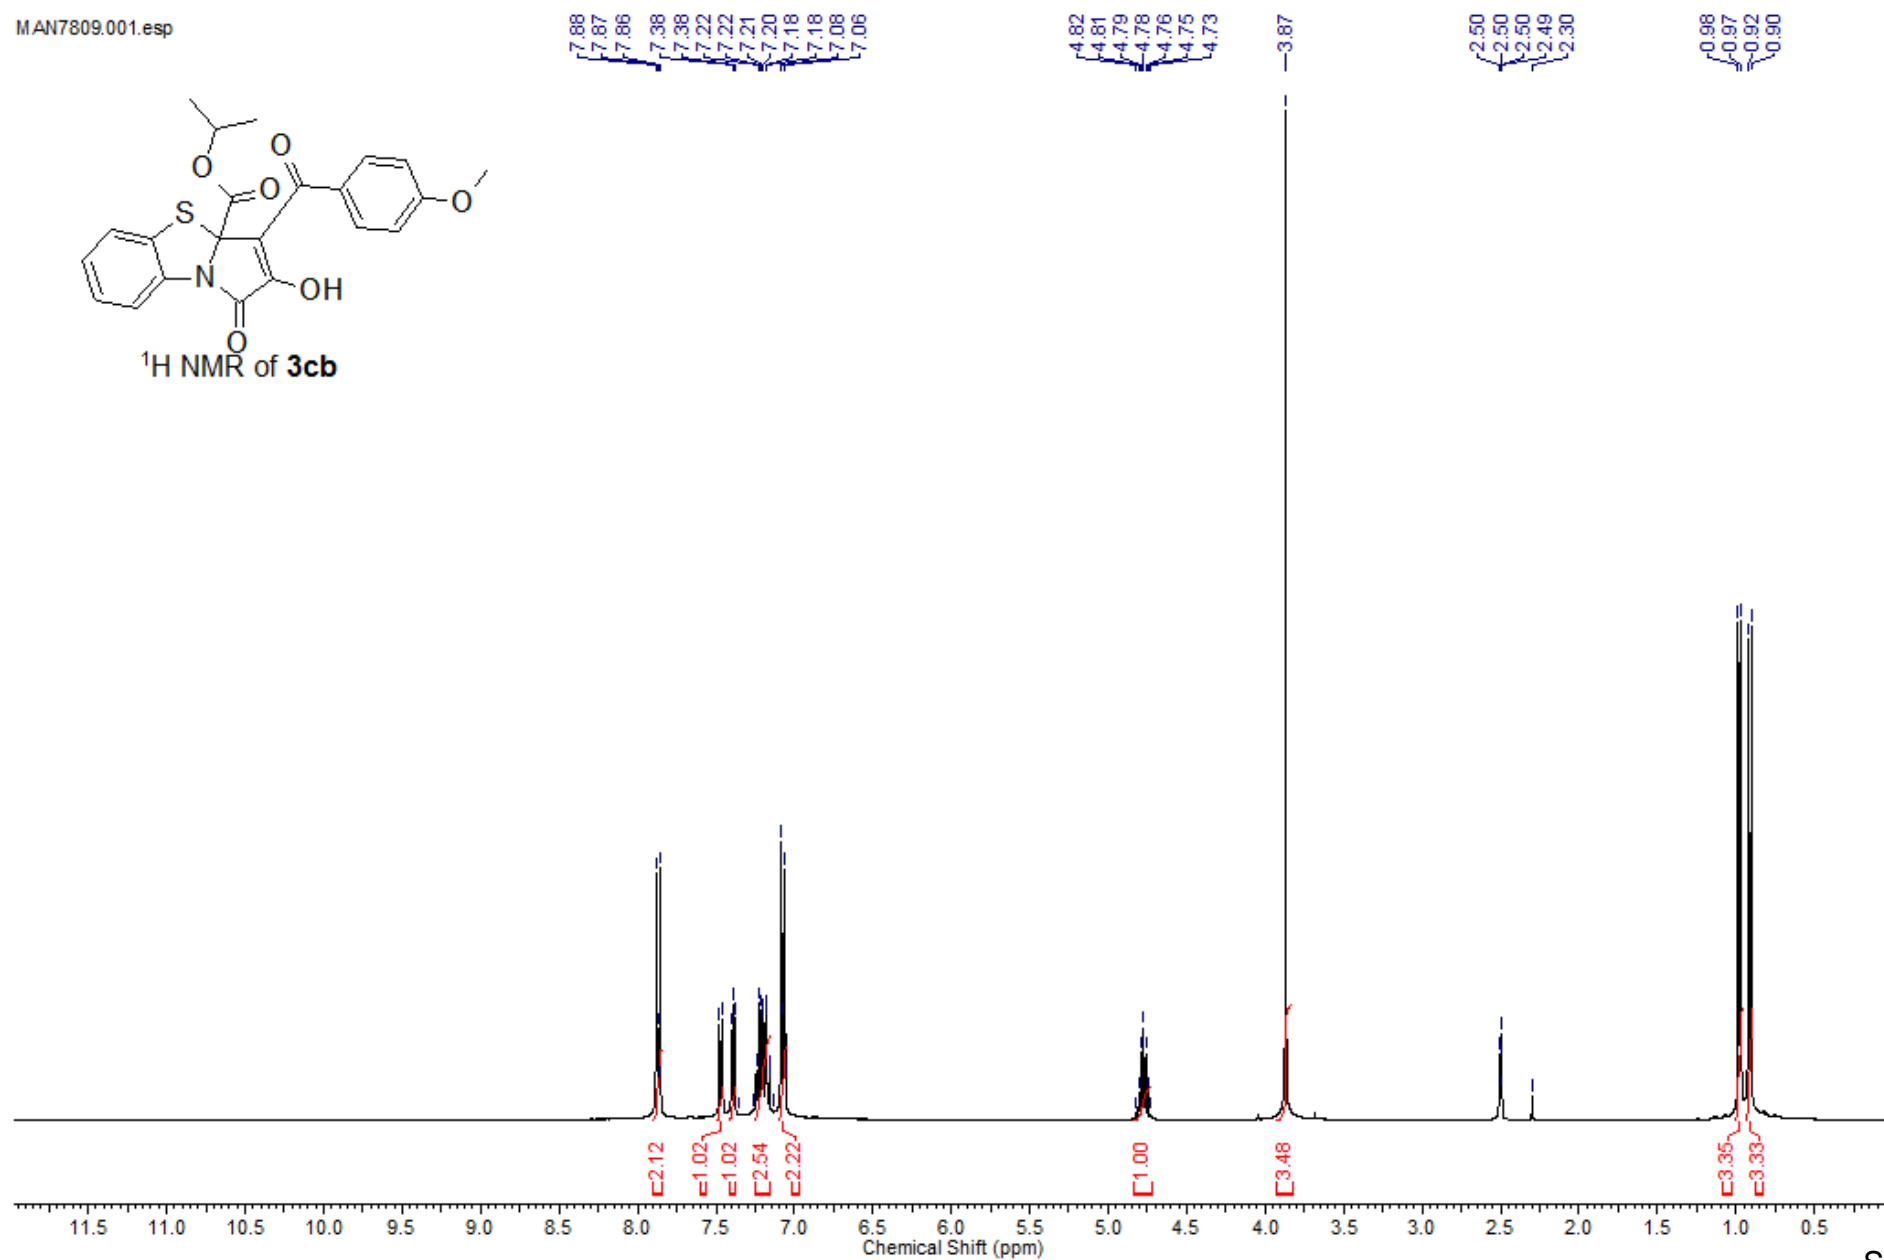

MAN7809.002.esp

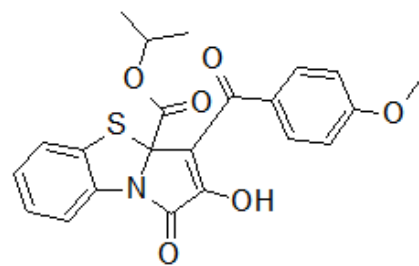

<sup>13</sup>C NMR of 3cb

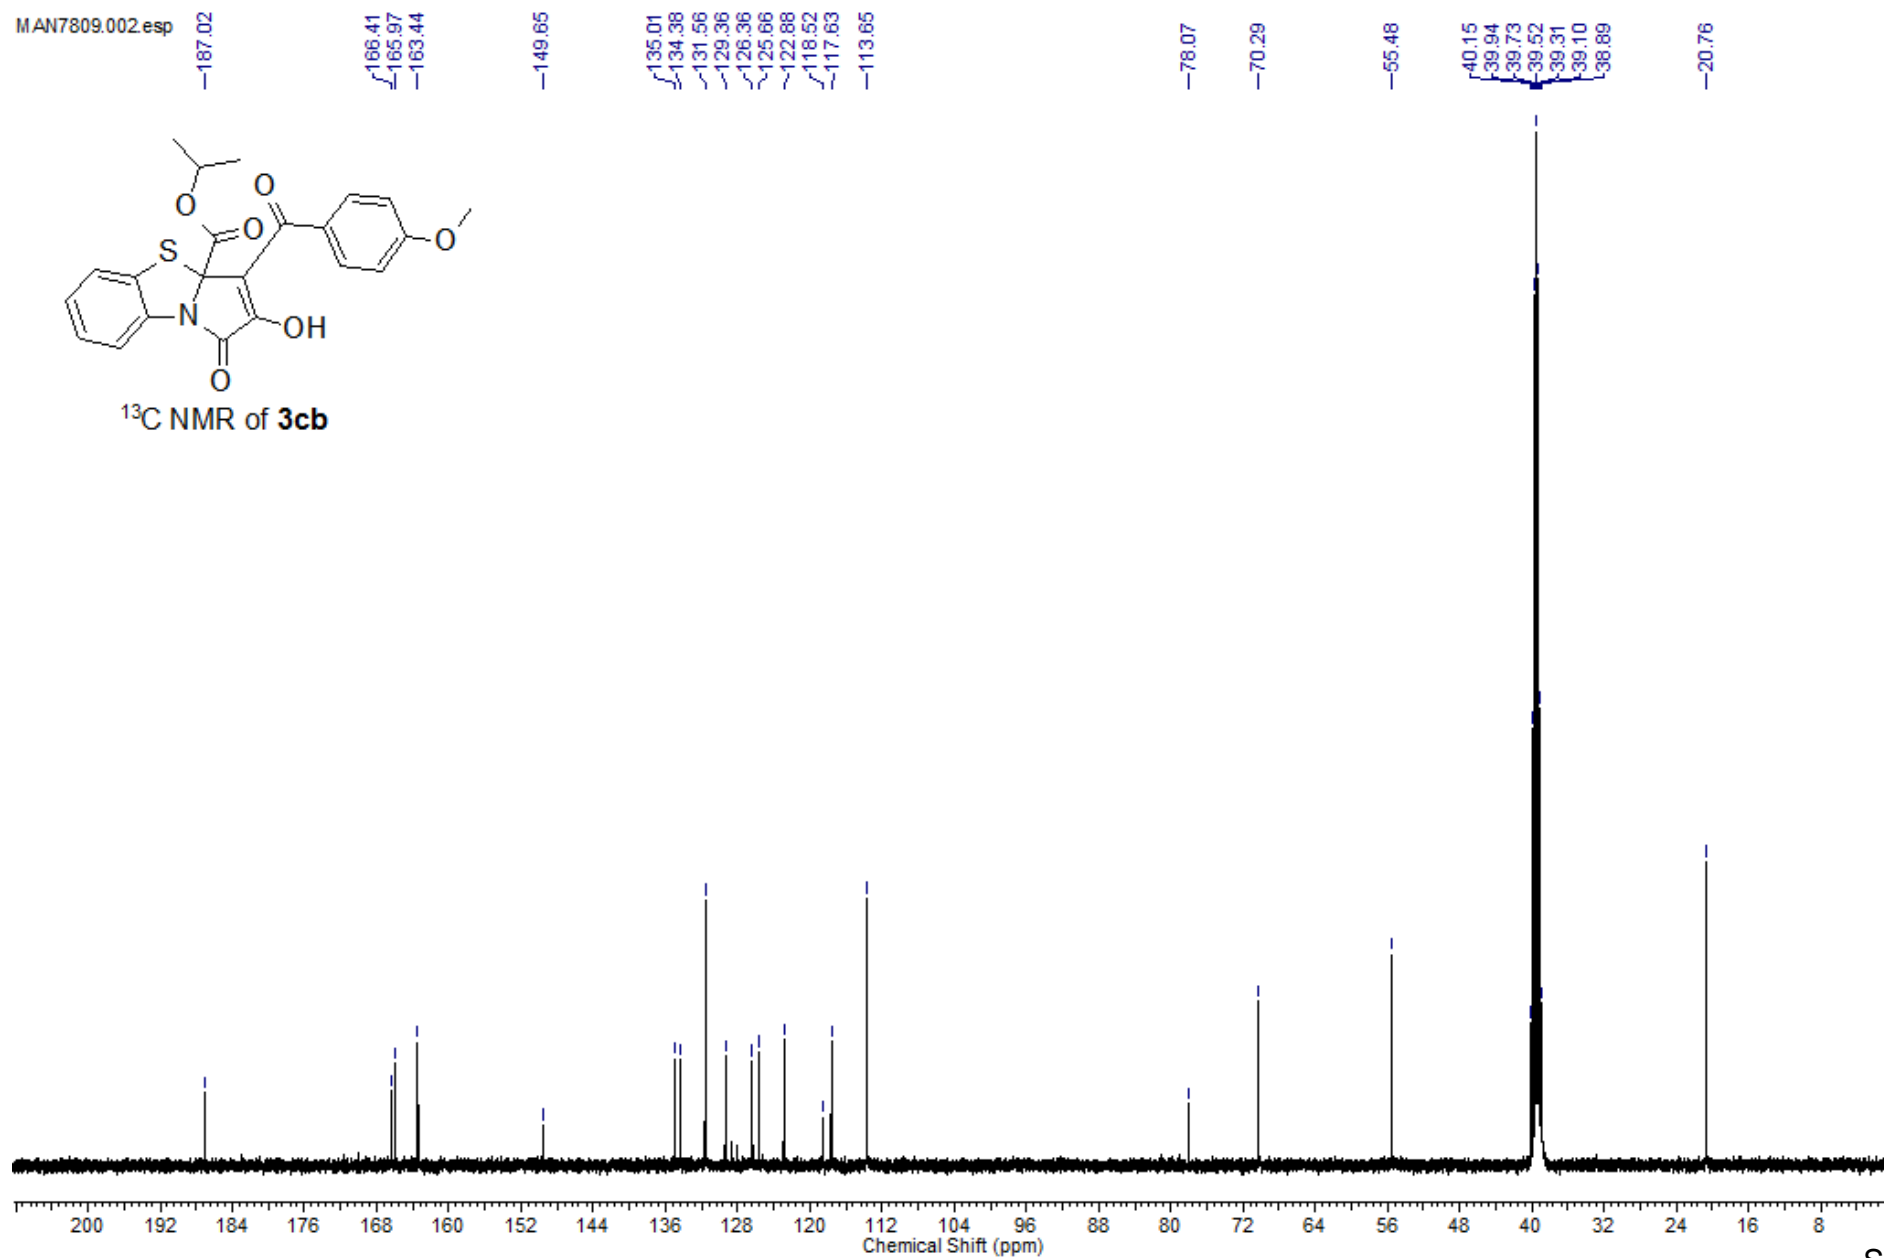

MAN7809.003.esp

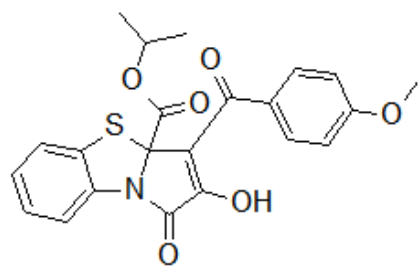

DEPT135 of **3cb**

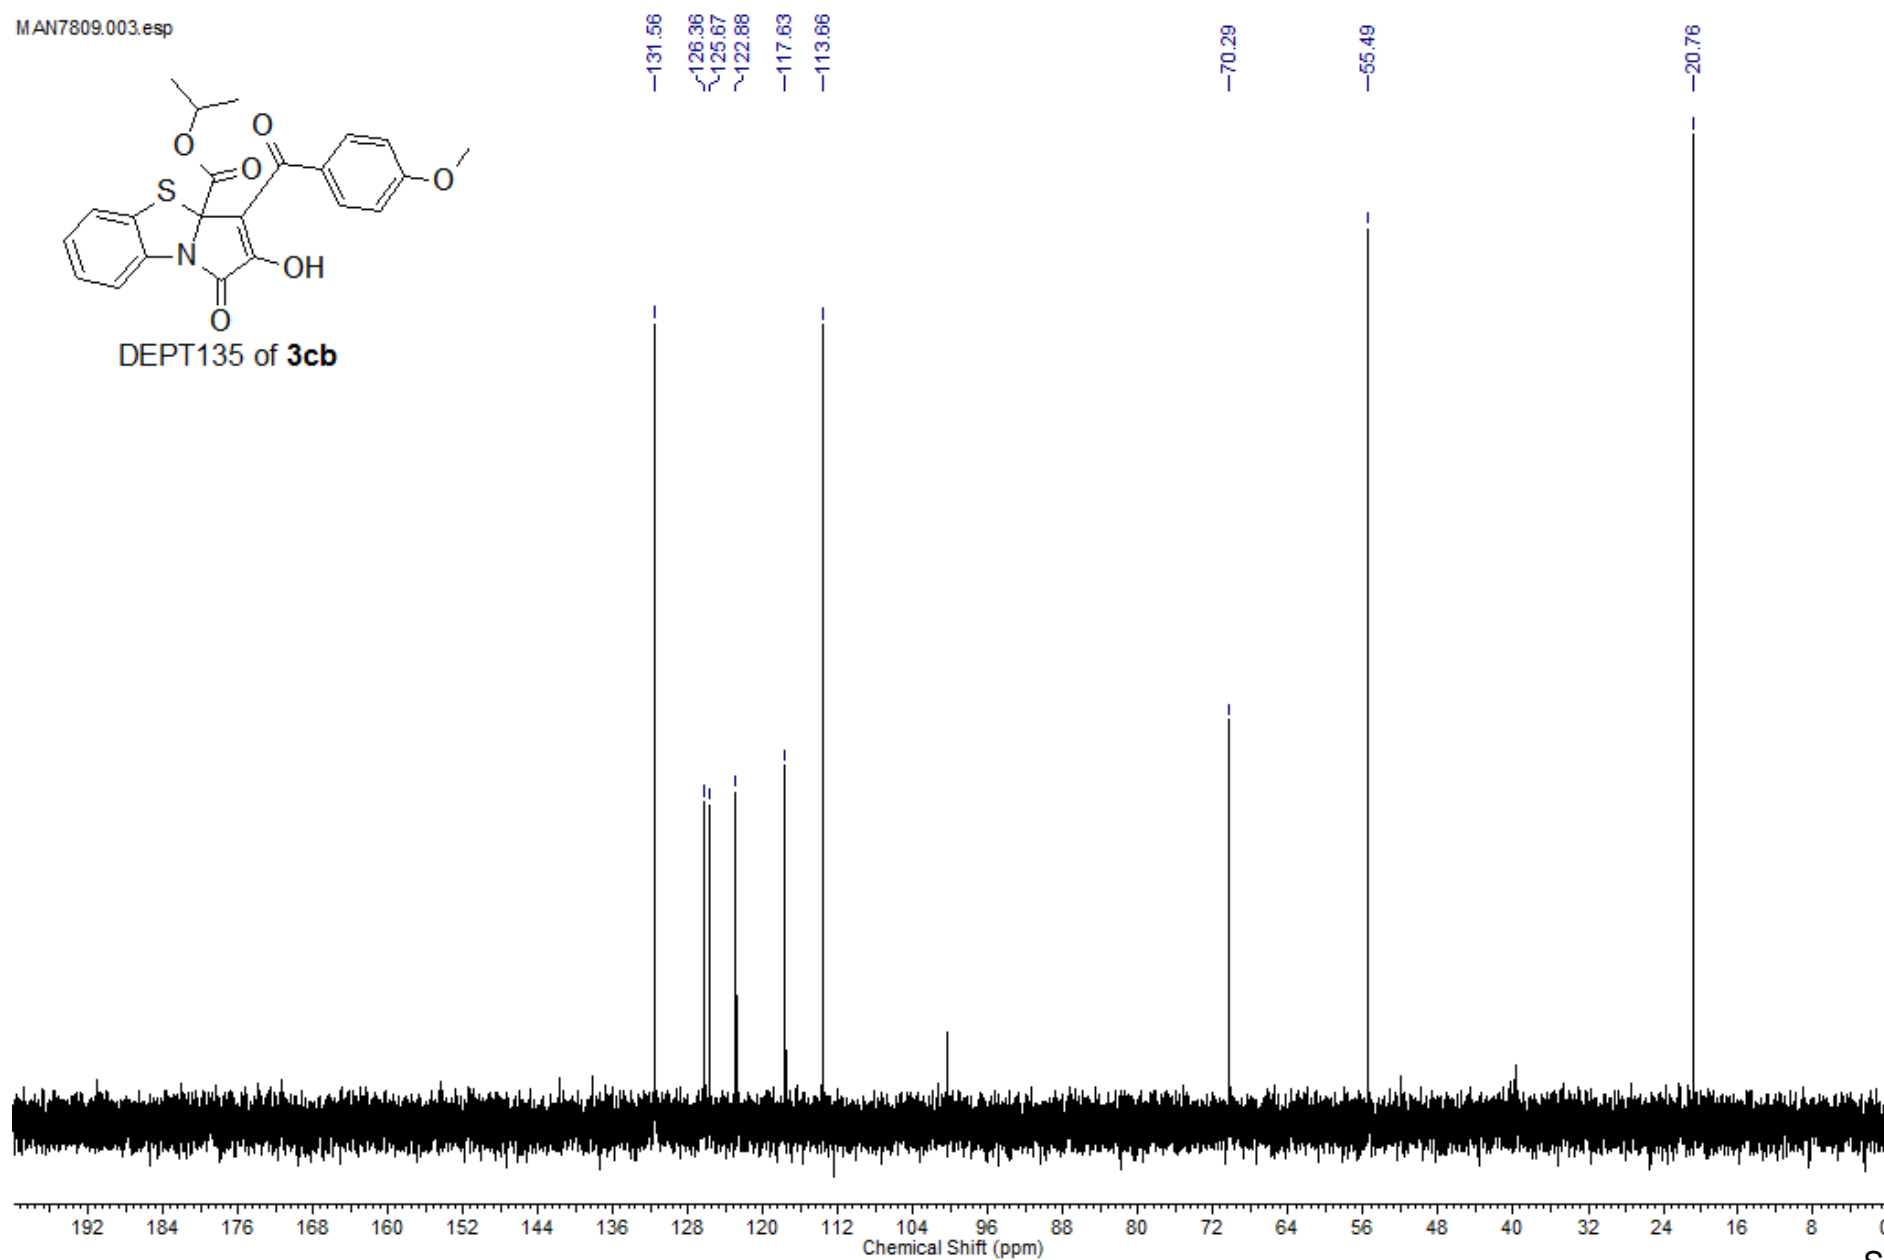

MAN7381.001.esp

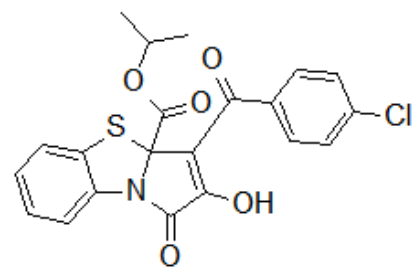

<sup>1</sup>H NMR of **3eb**

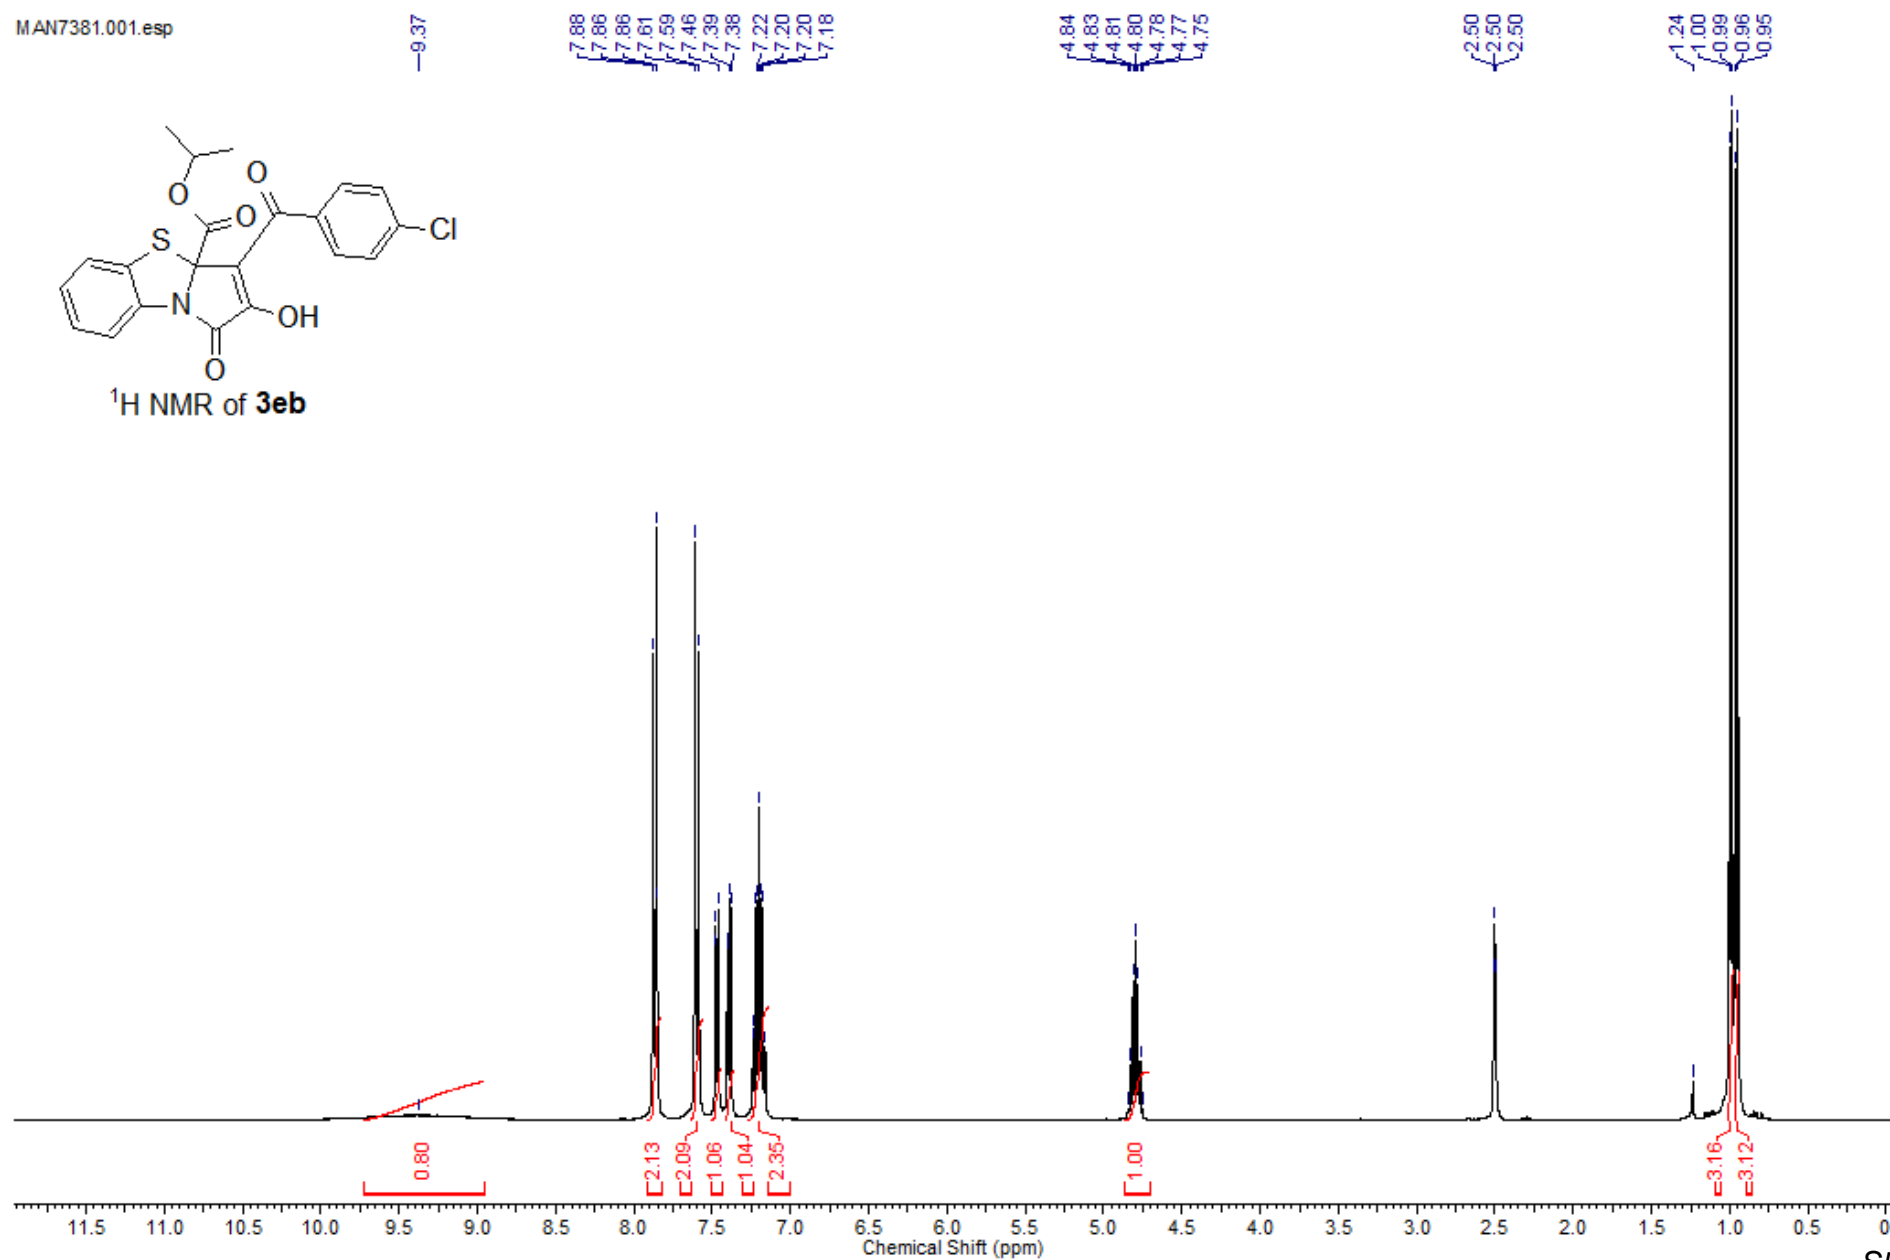

MAN7381.000 esp

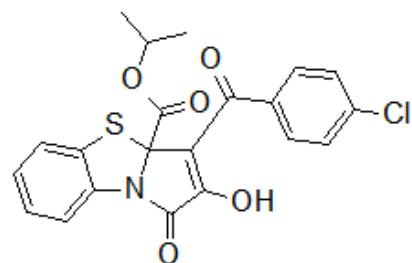

<sup>13</sup>C NMR of **3eb**

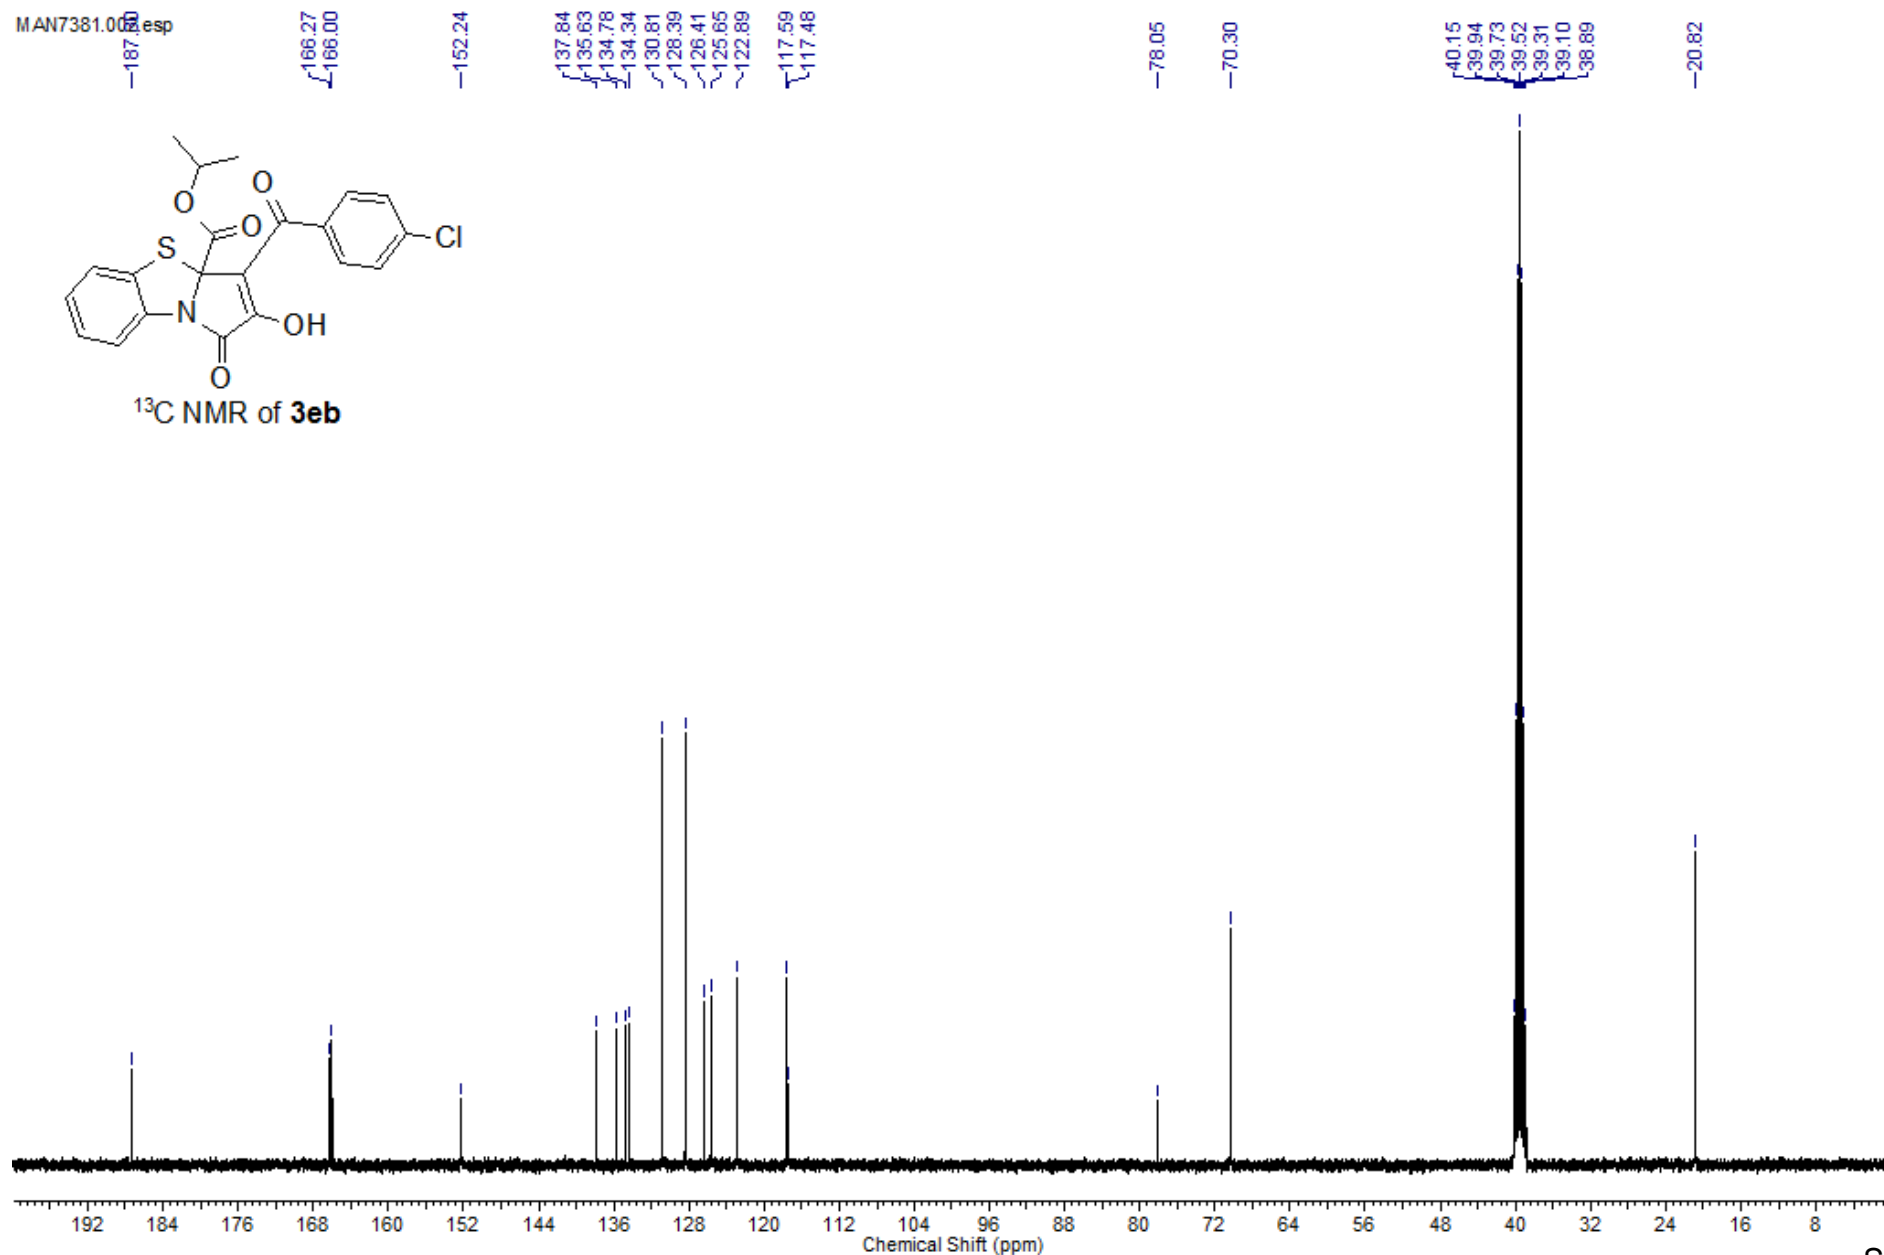

MAN7381.003.esp

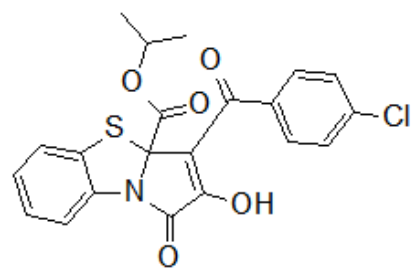

DEPT 135 of **3eb**

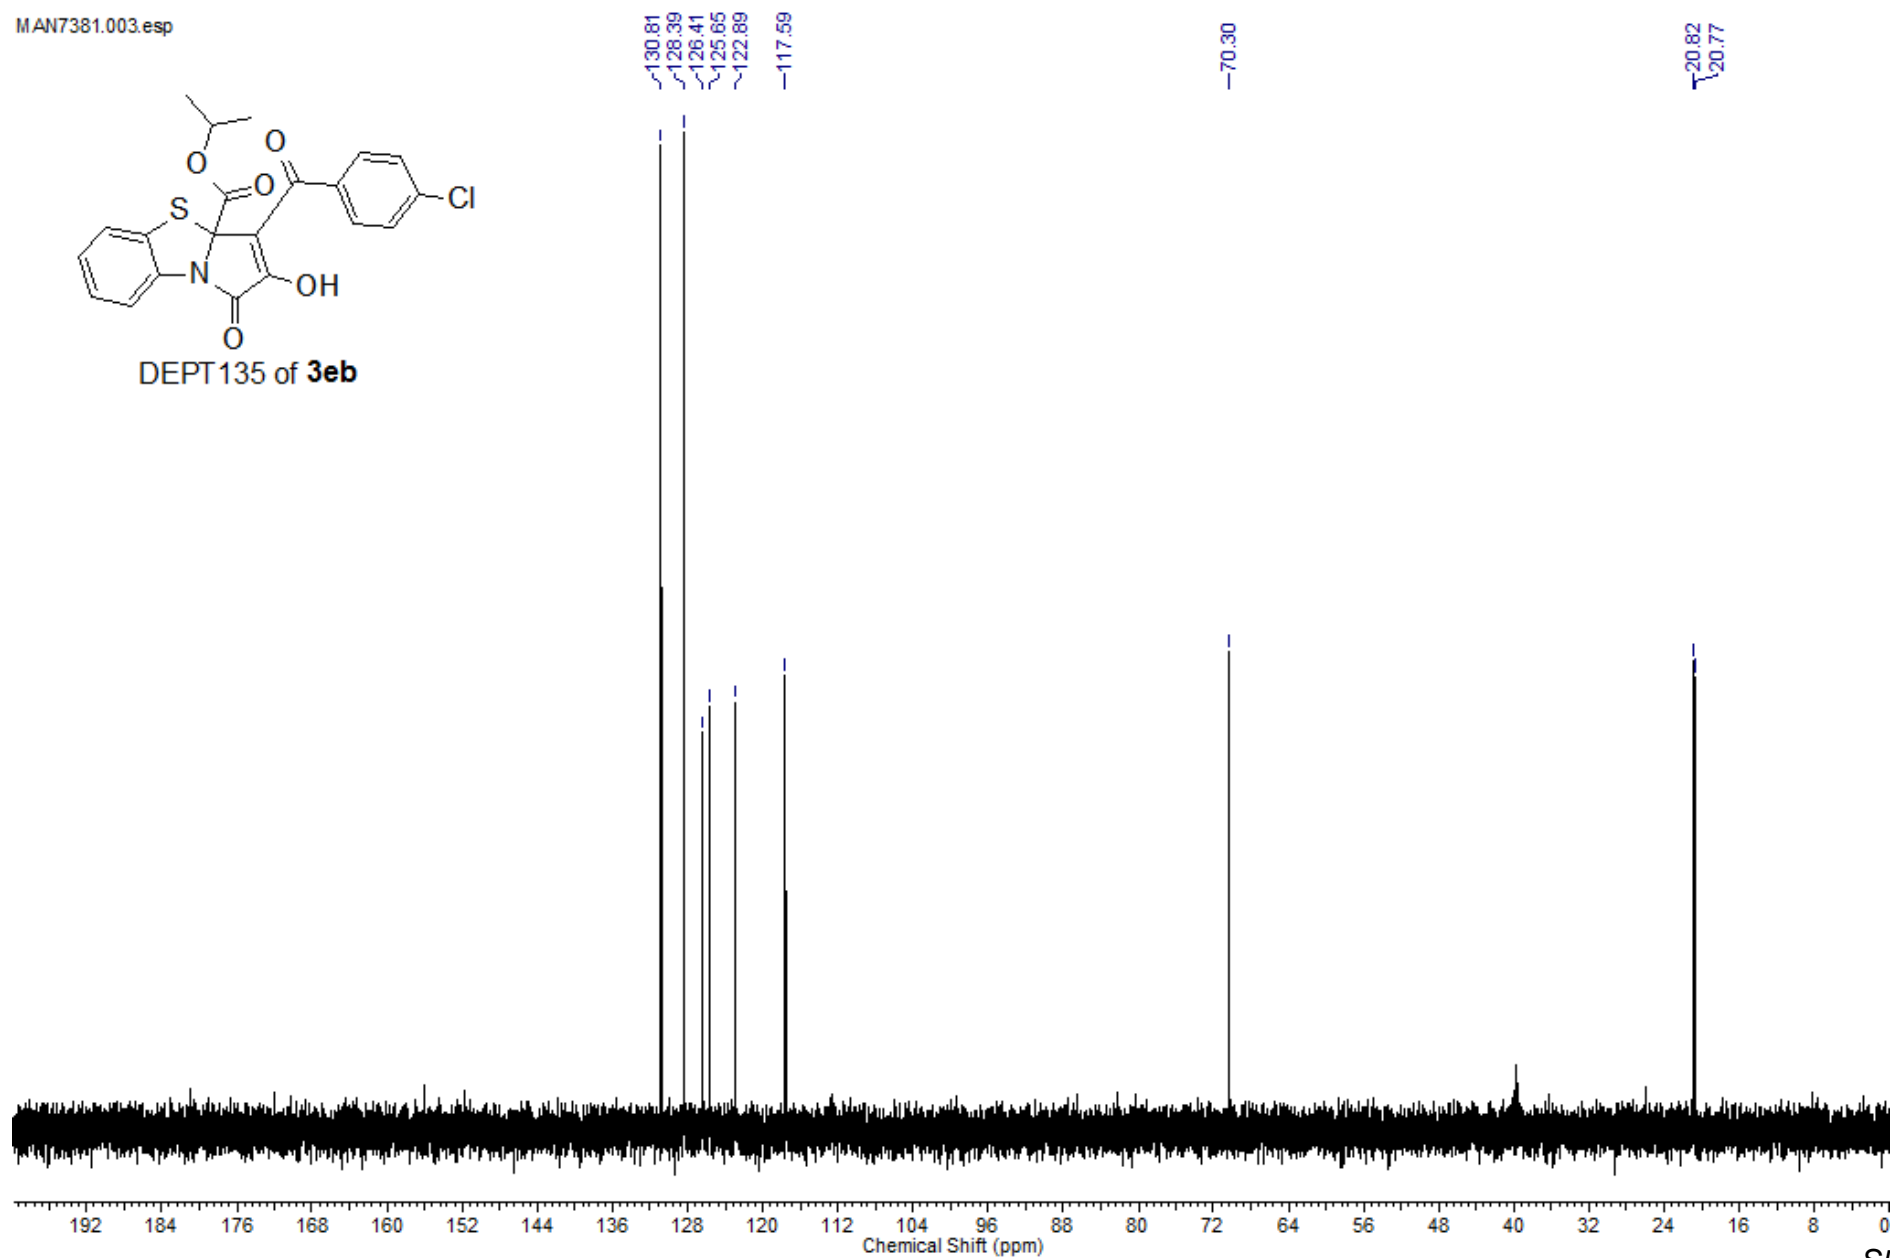

MAN7612.001.esp

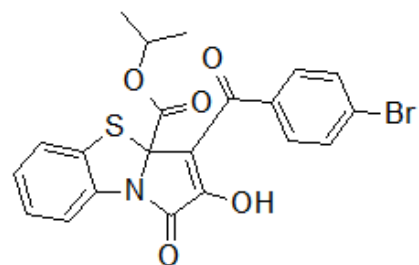

$^1\text{H}$  NMR of **3fb**

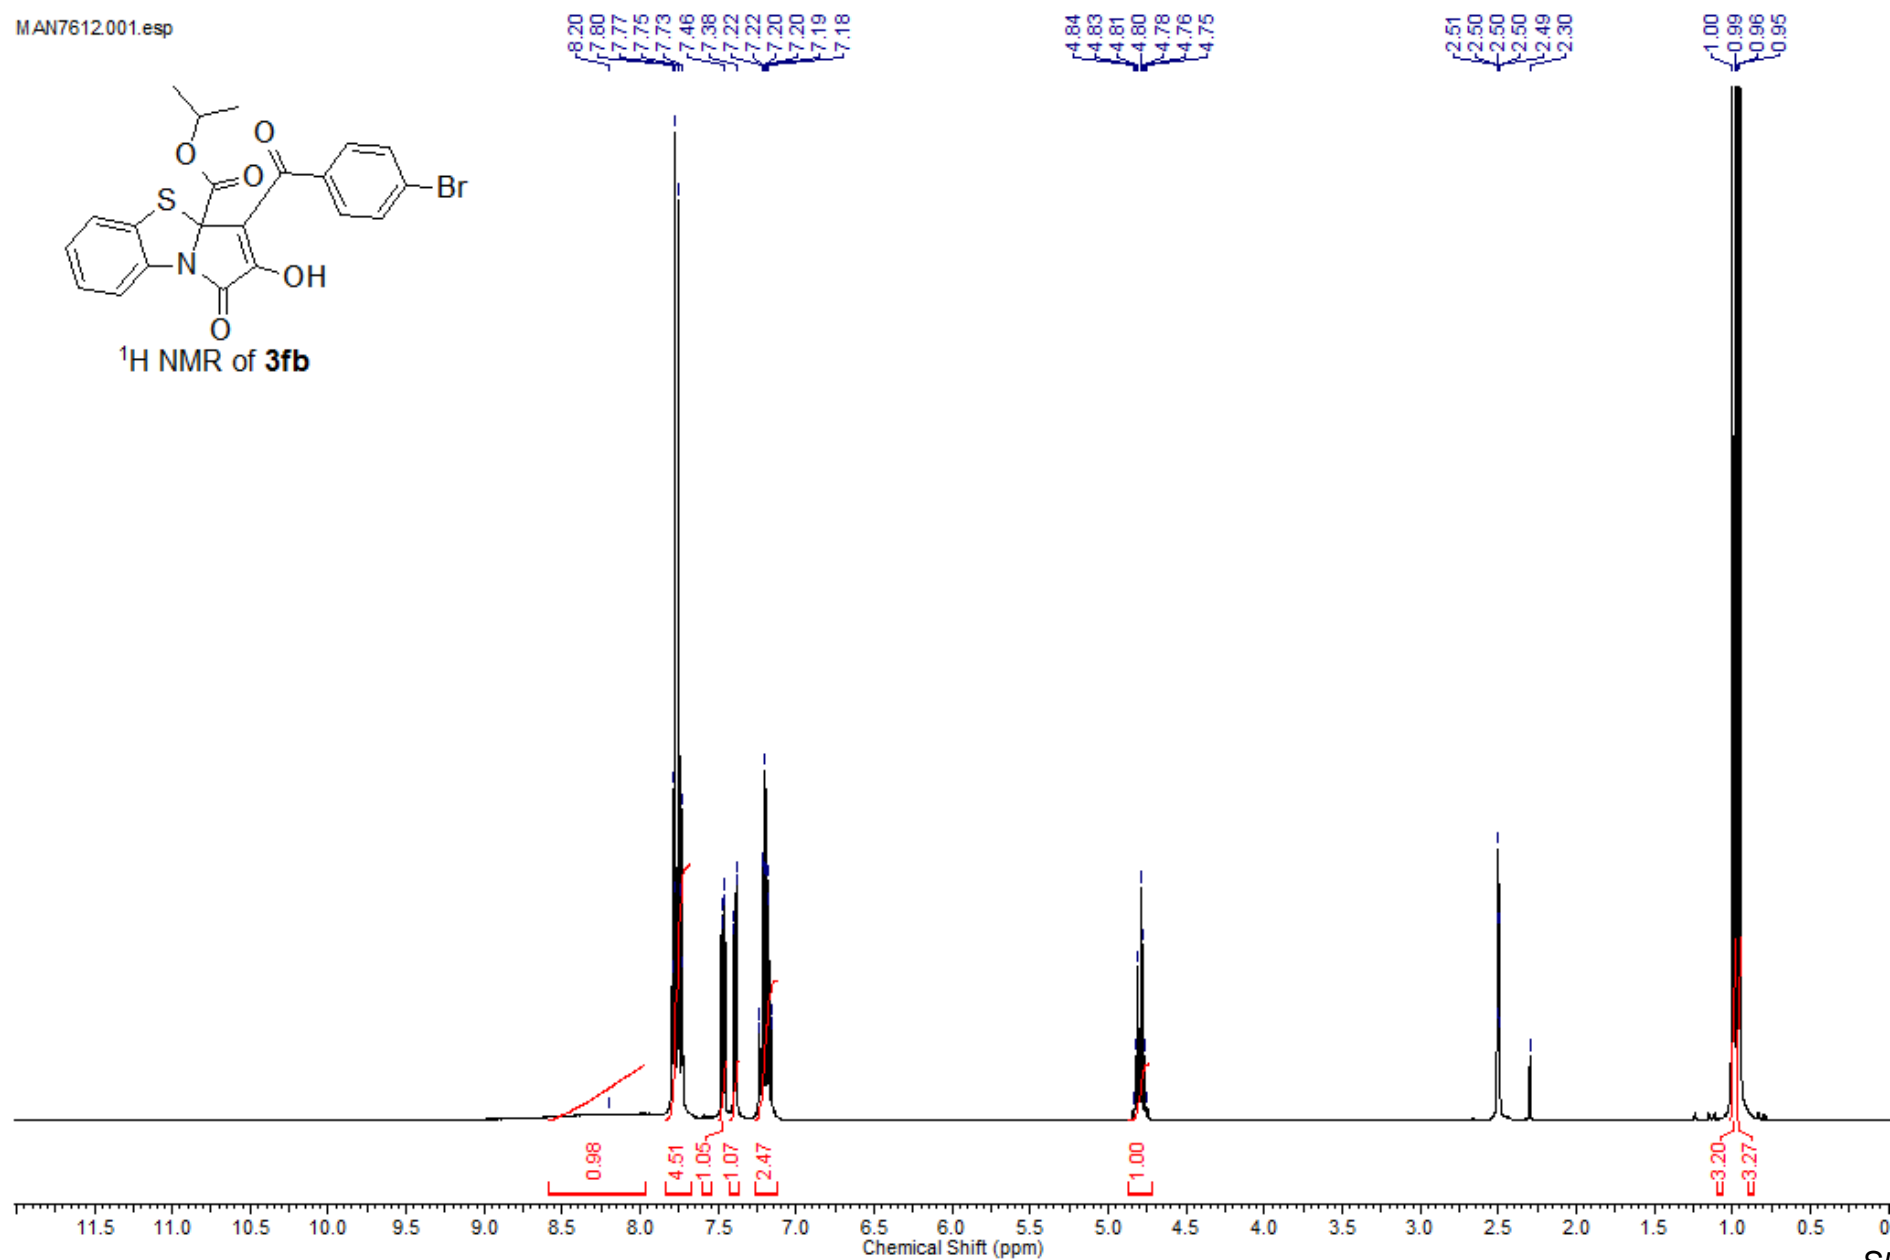

MAN7612.002.esp

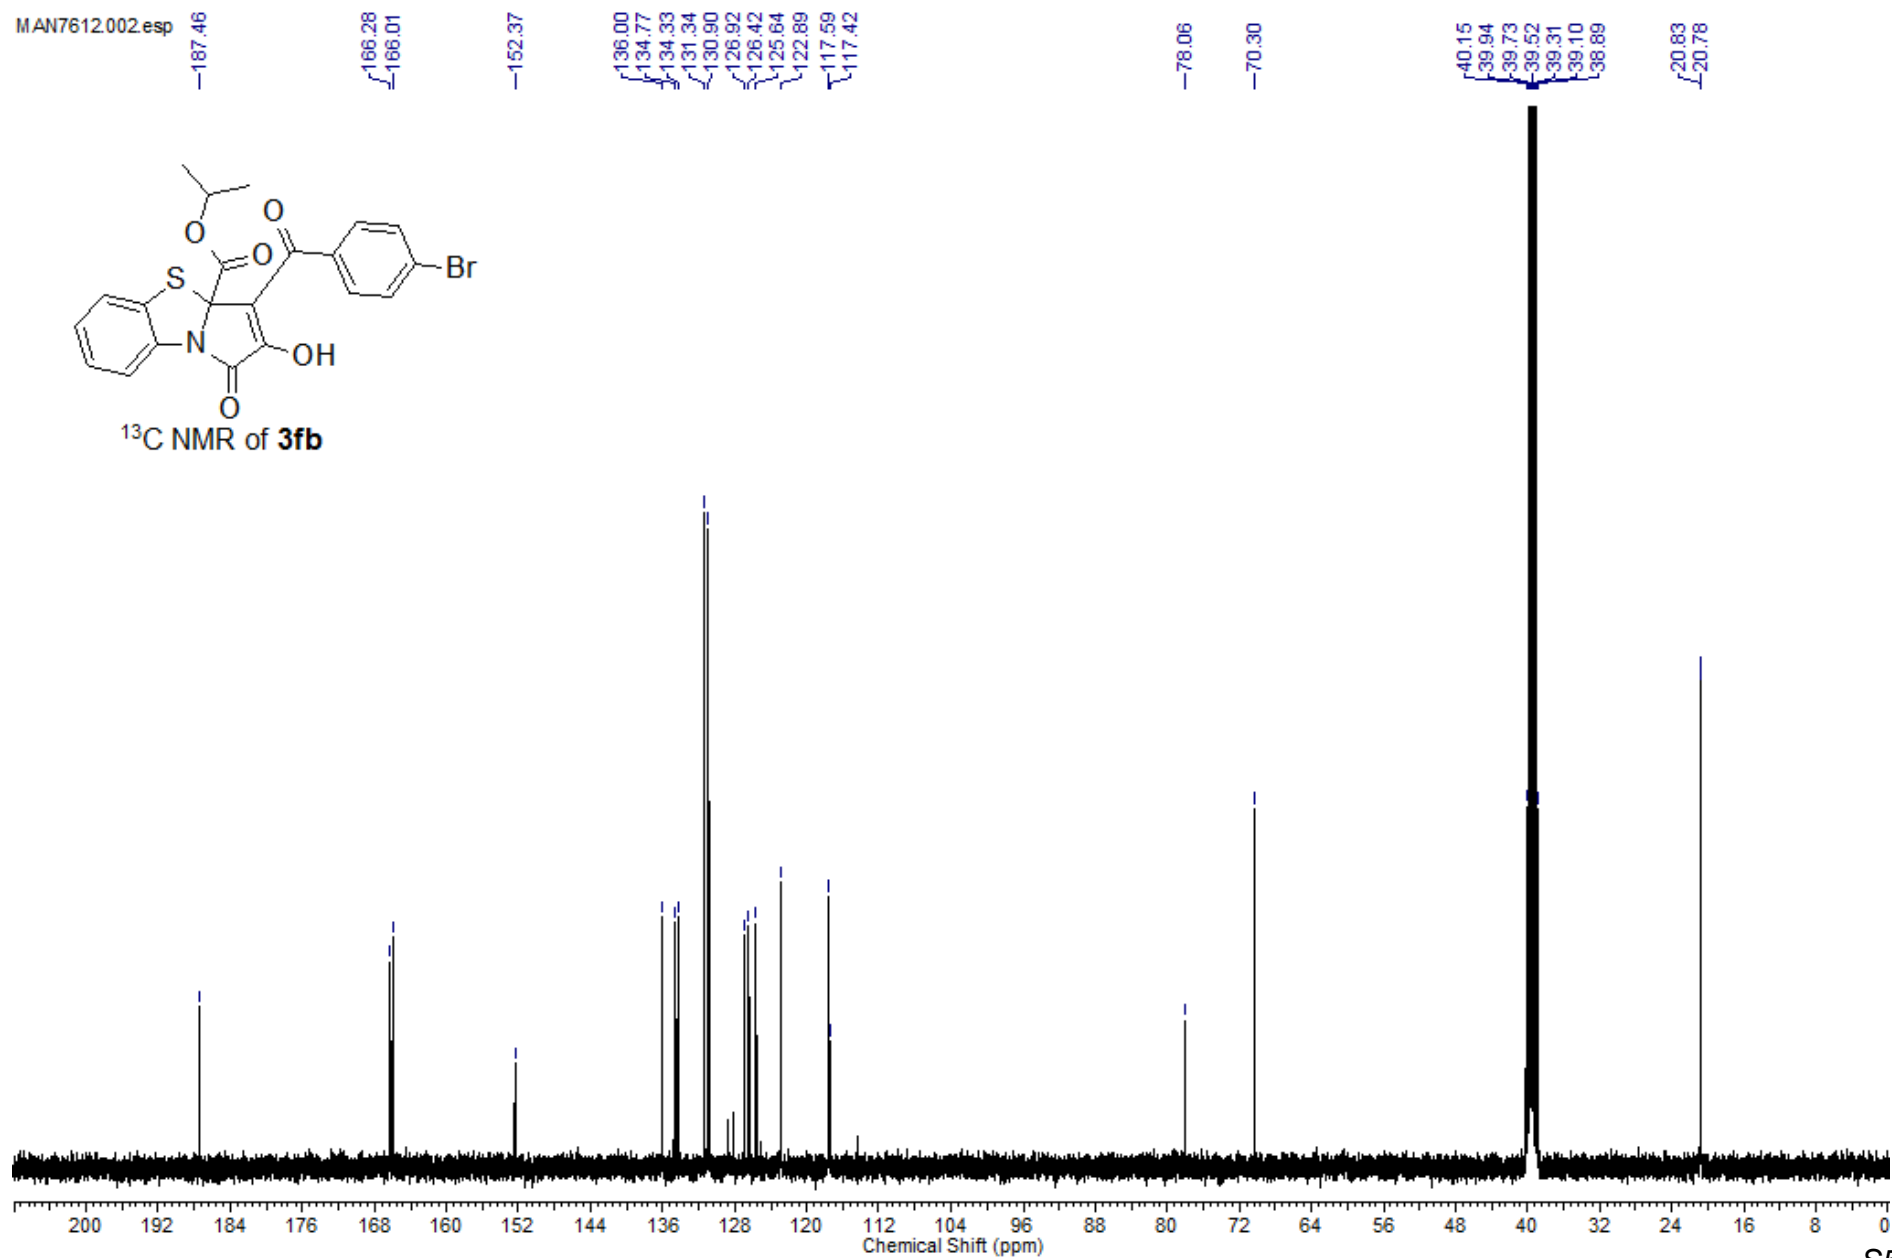



MAN7612.003.esp

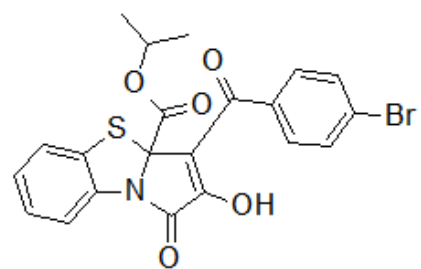

DEPT135 of **3fb**

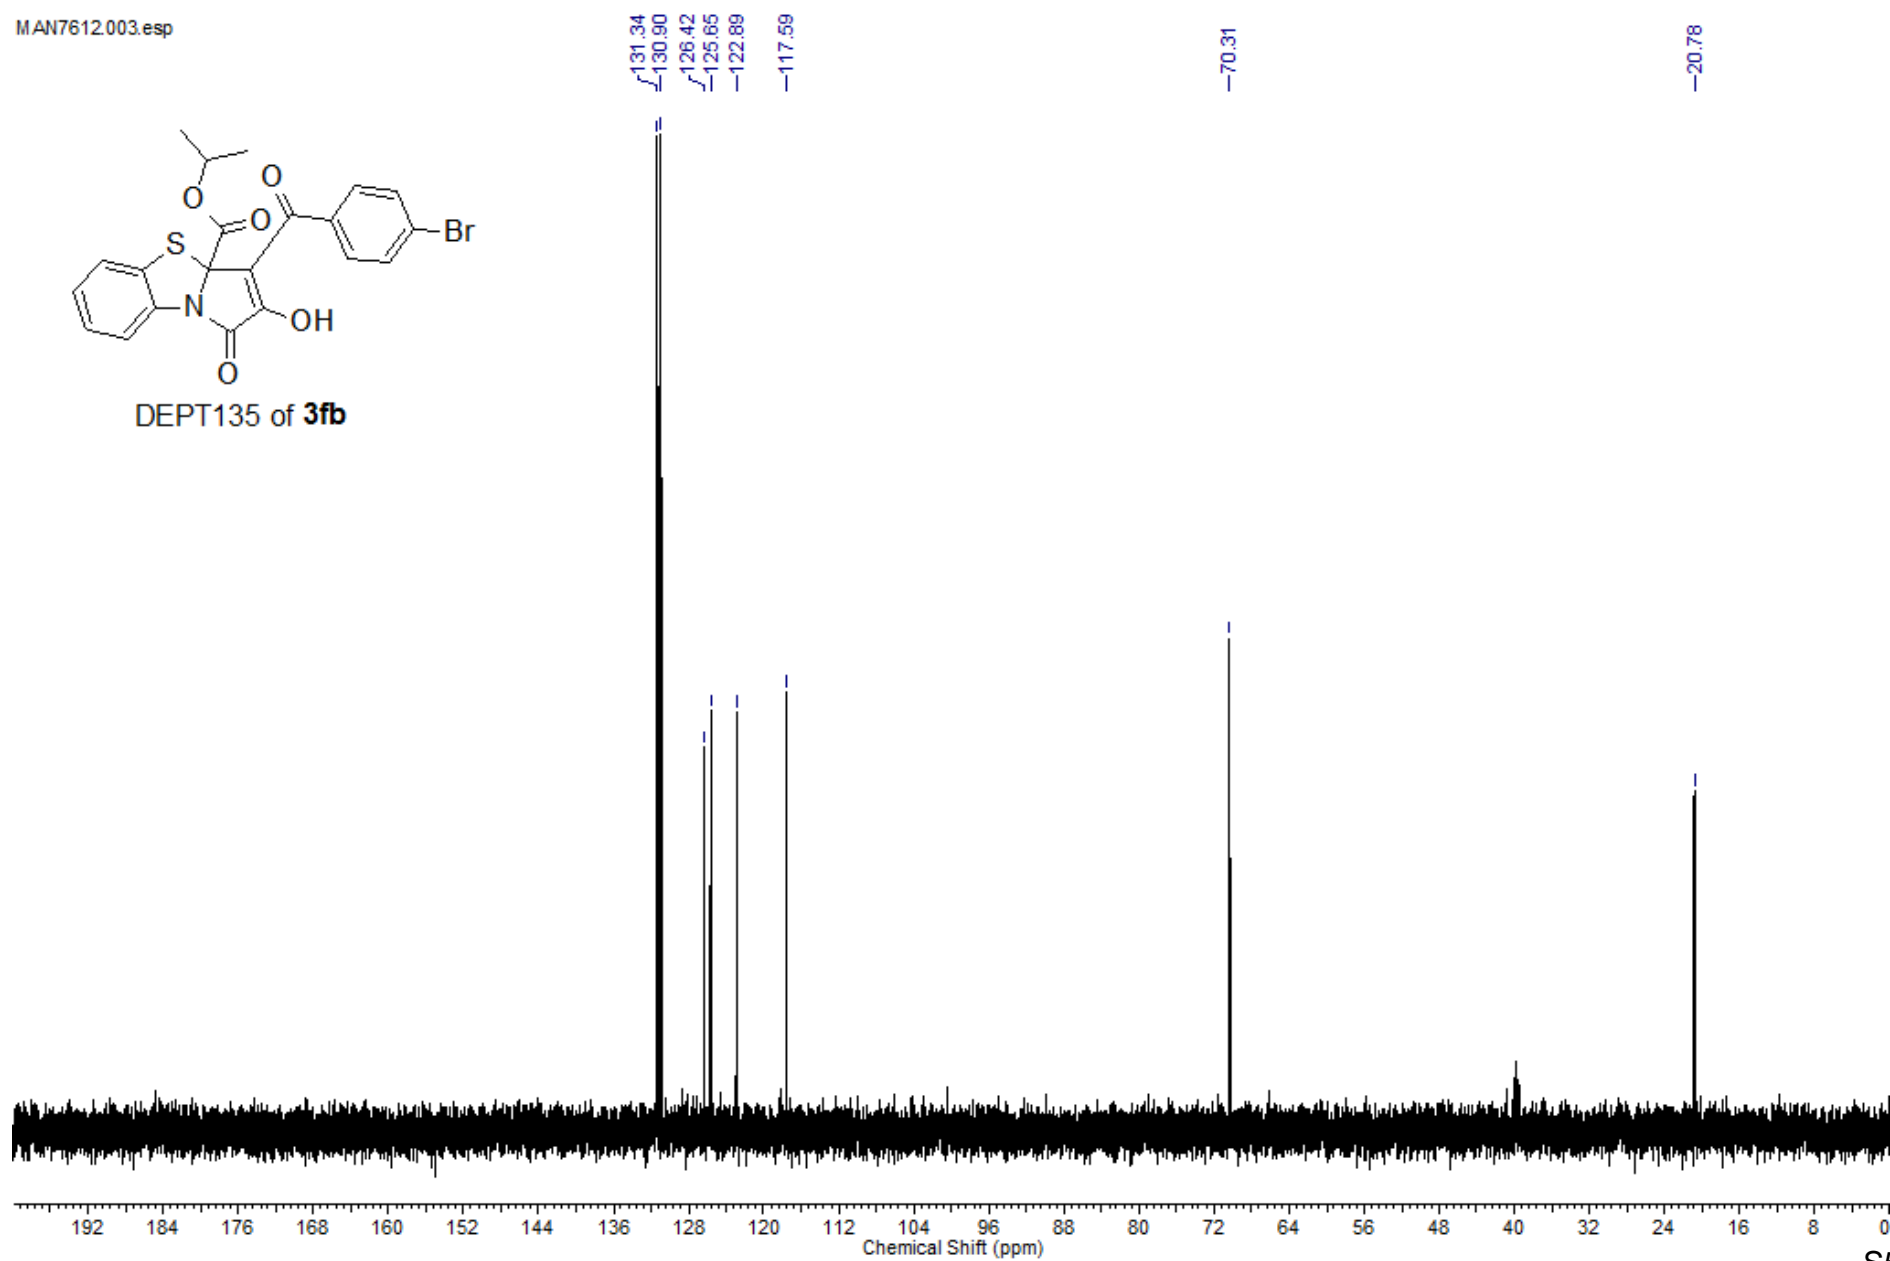

MAN7850.001.esp

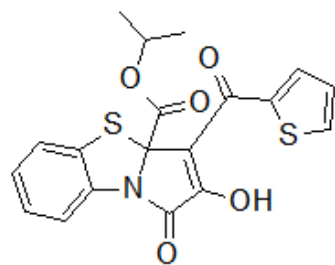

<sup>1</sup>H NMR of **3hb**

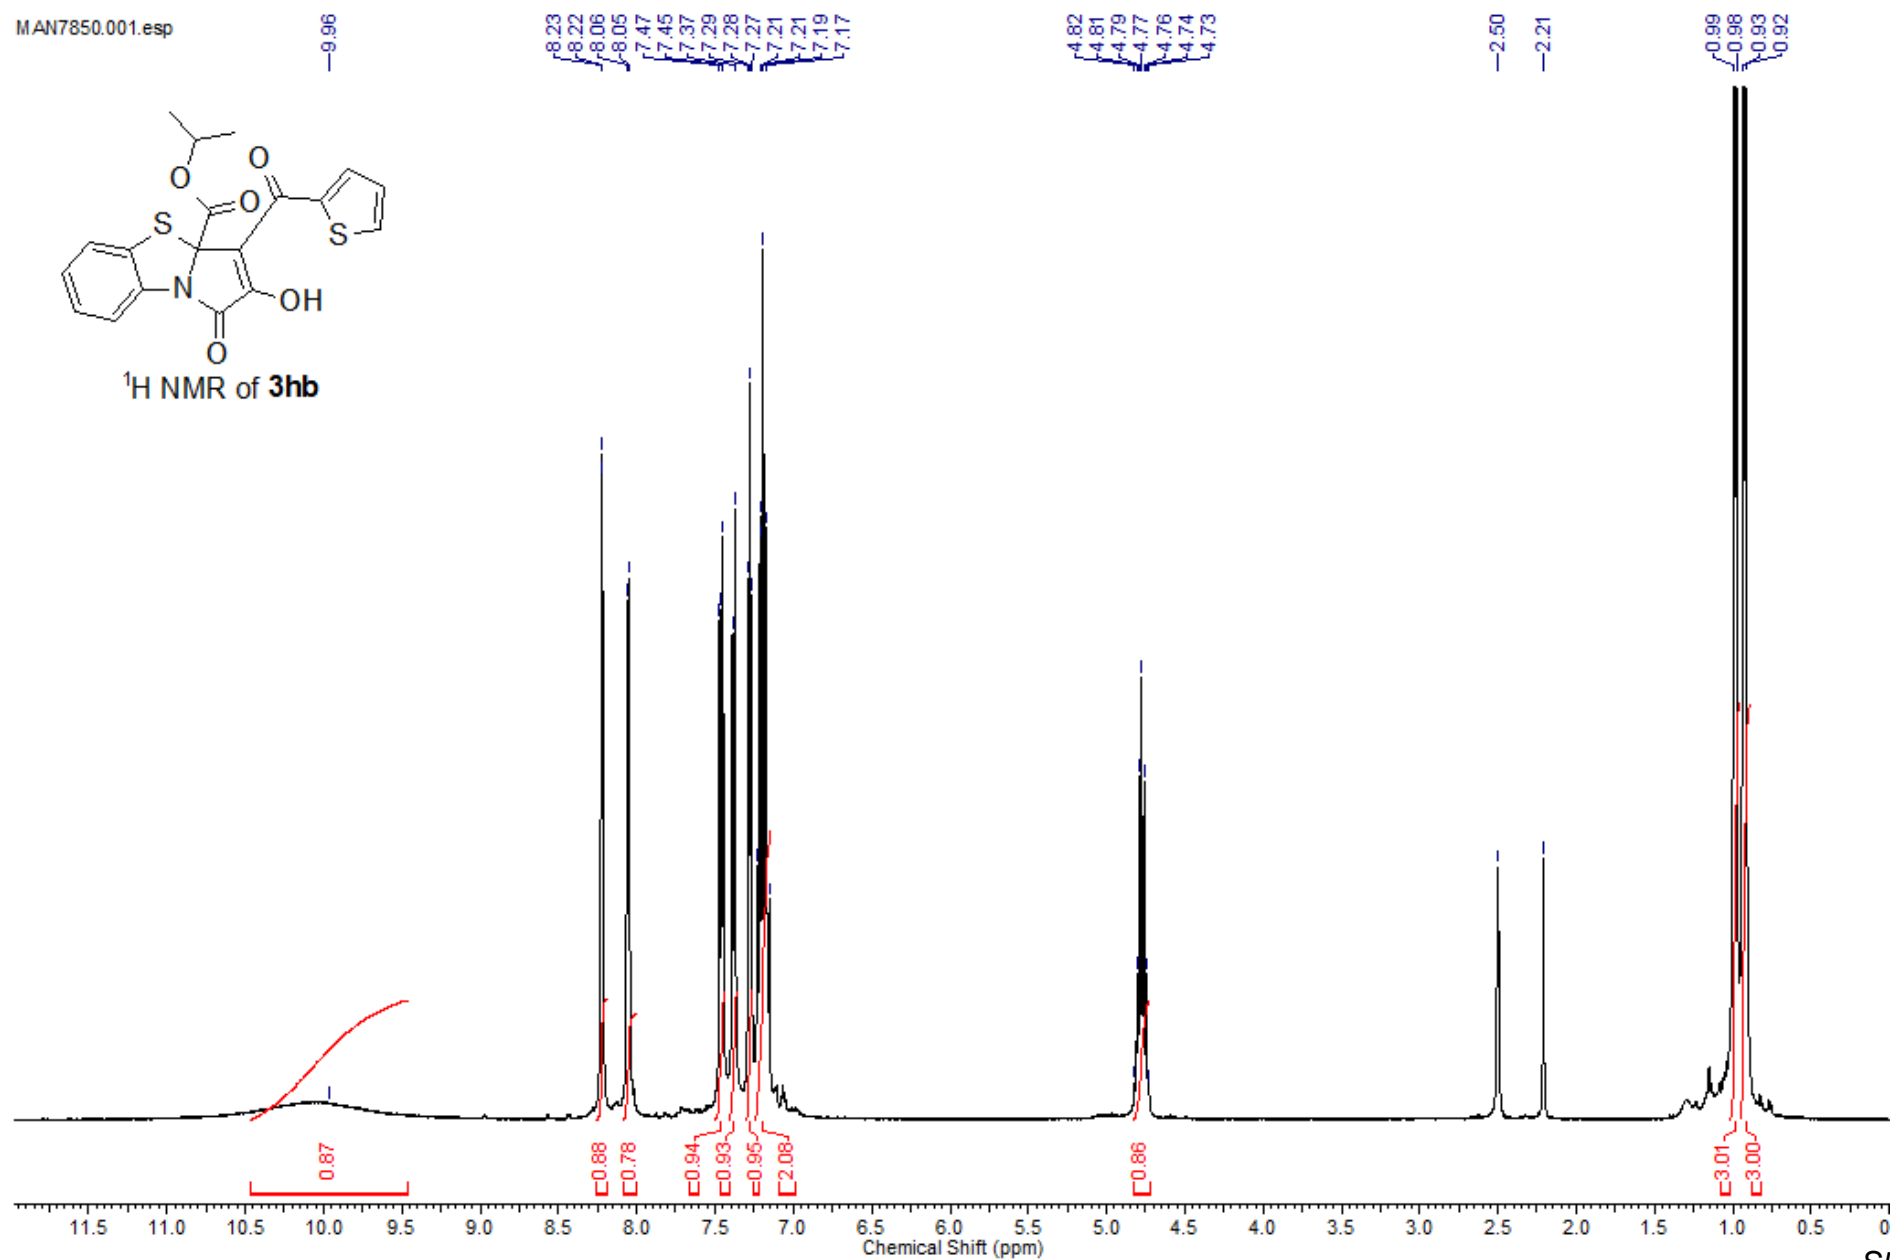

MAN7850.002.esp

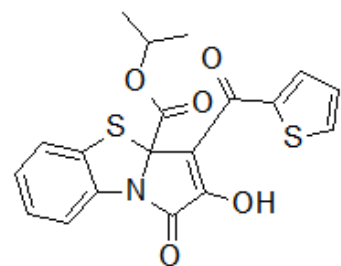

<sup>13</sup>C NMR of **3hb**

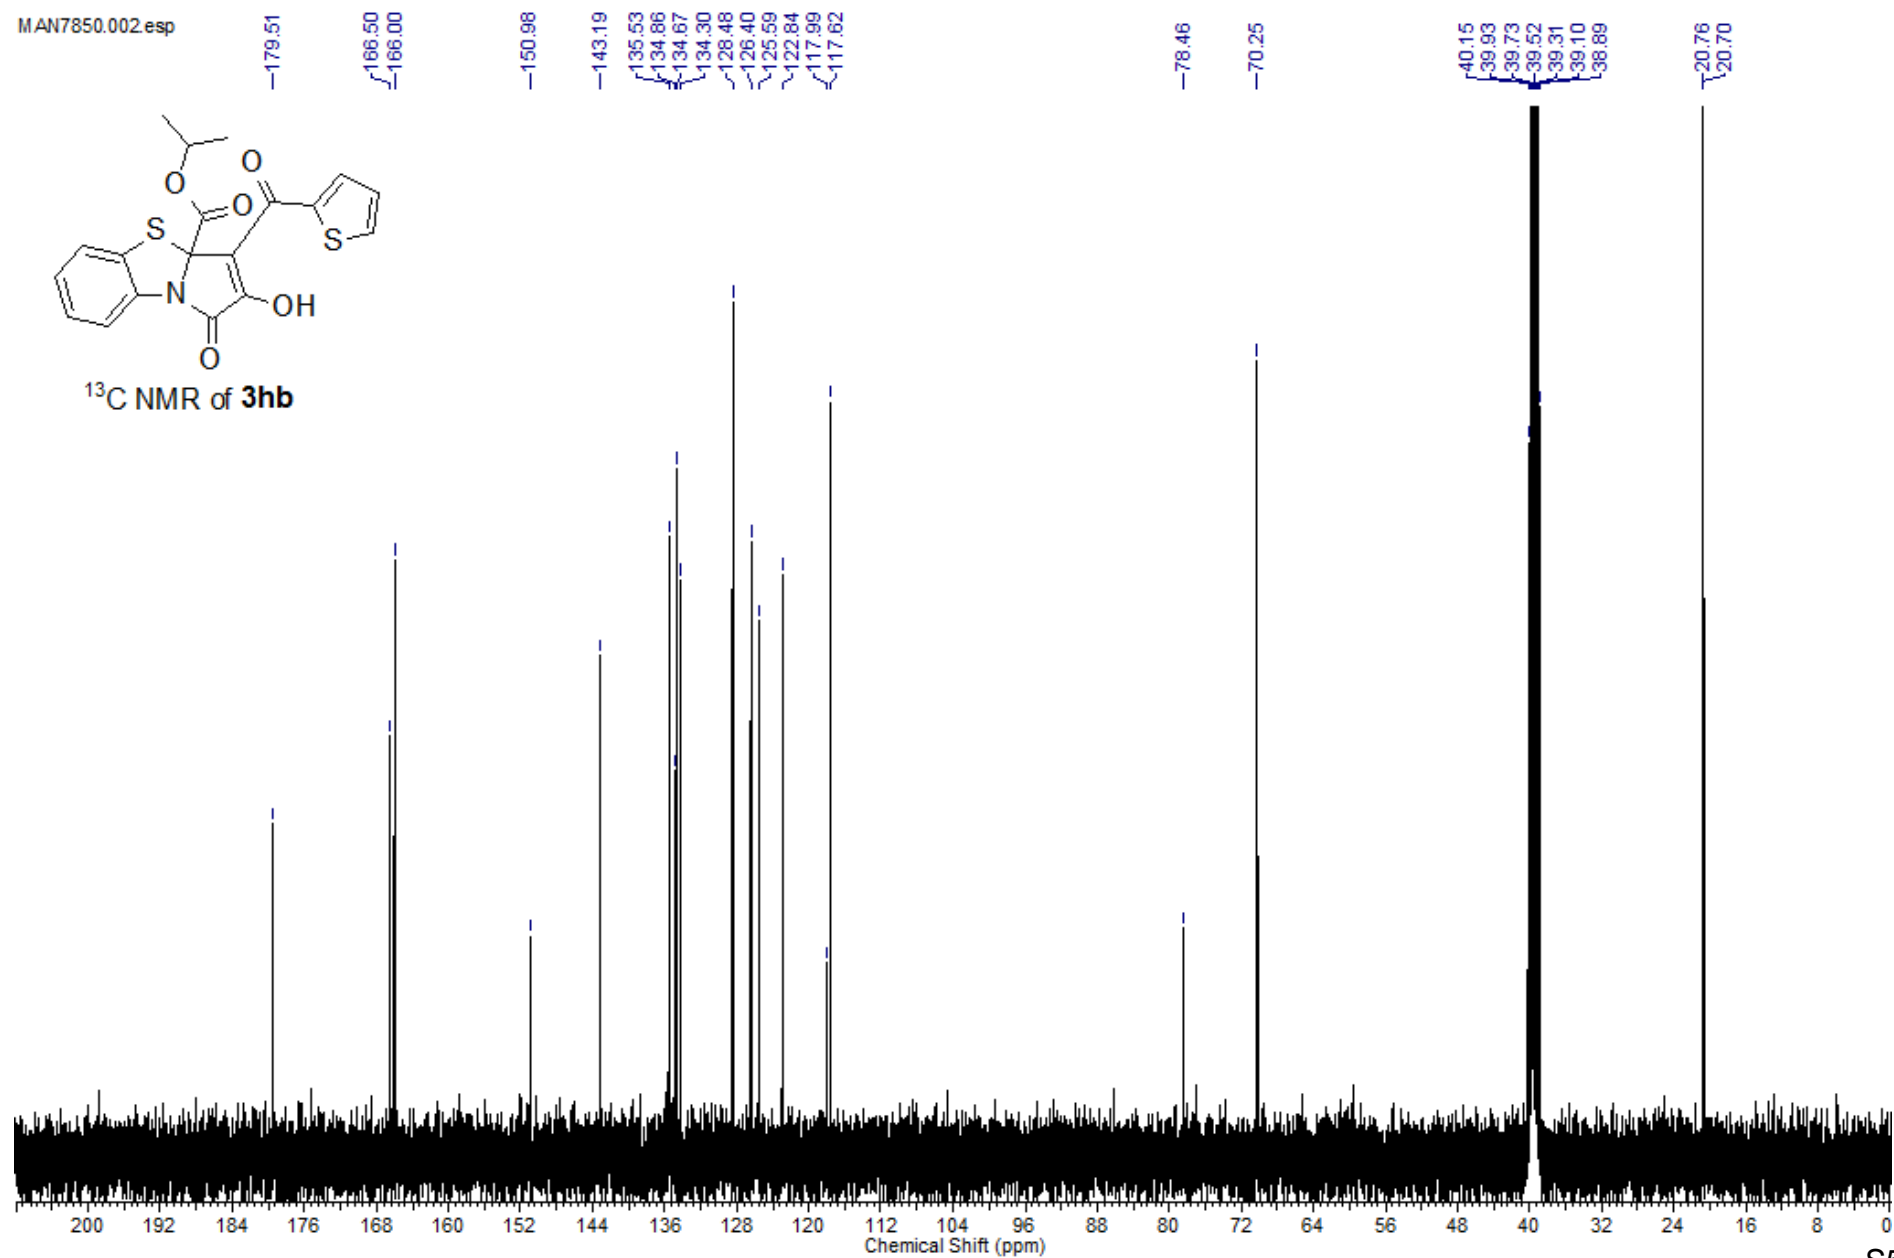

MAN7850.003.esp

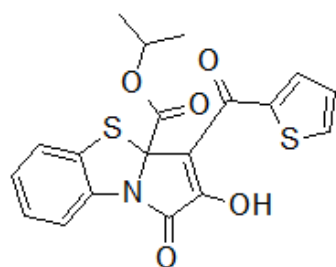

DEPT135 of **3hb**

135.53  
134.67  
128.48  
126.39  
125.59  
122.84  
117.61

70.25

20.70

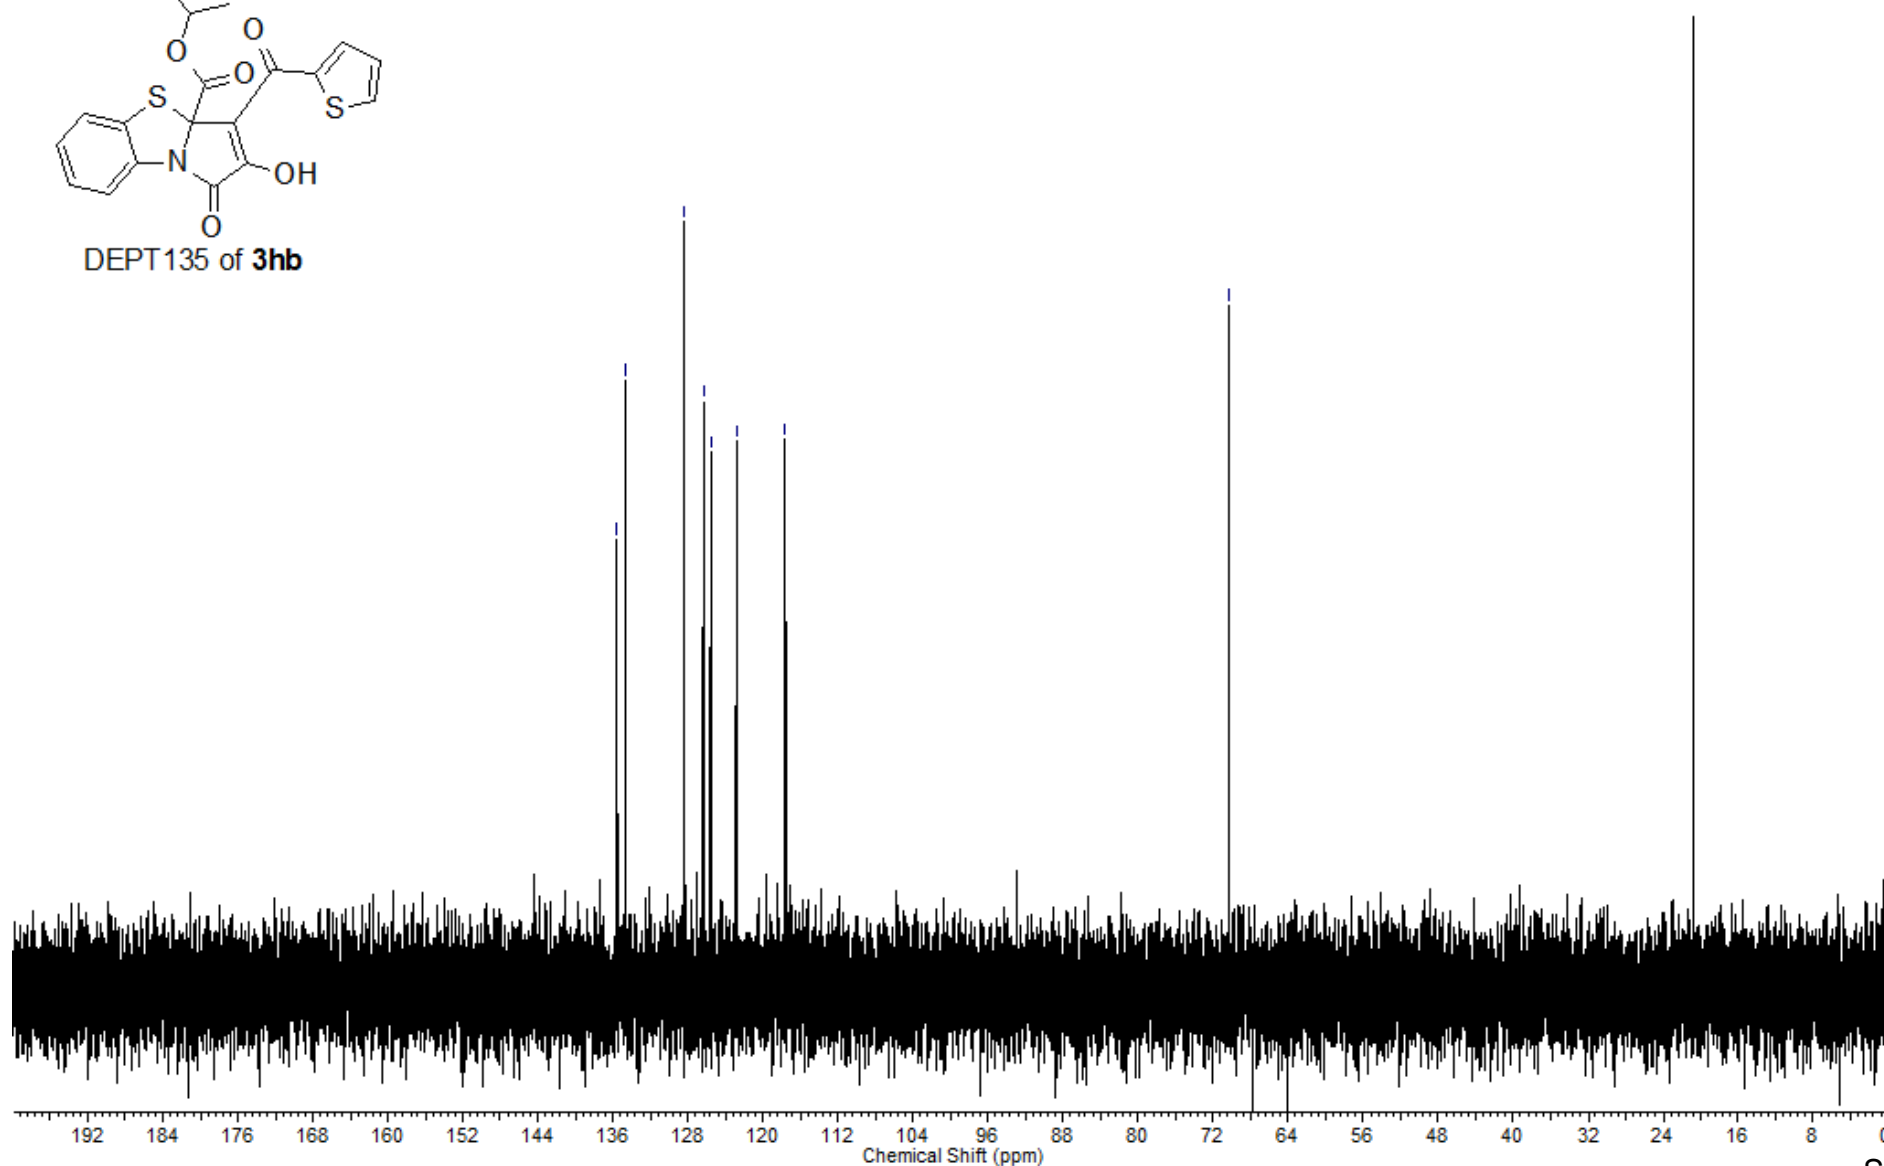

MAN7969.002.esp

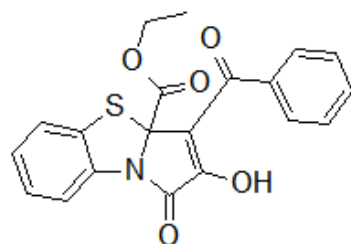

<sup>1</sup>H NMR of **3ac**

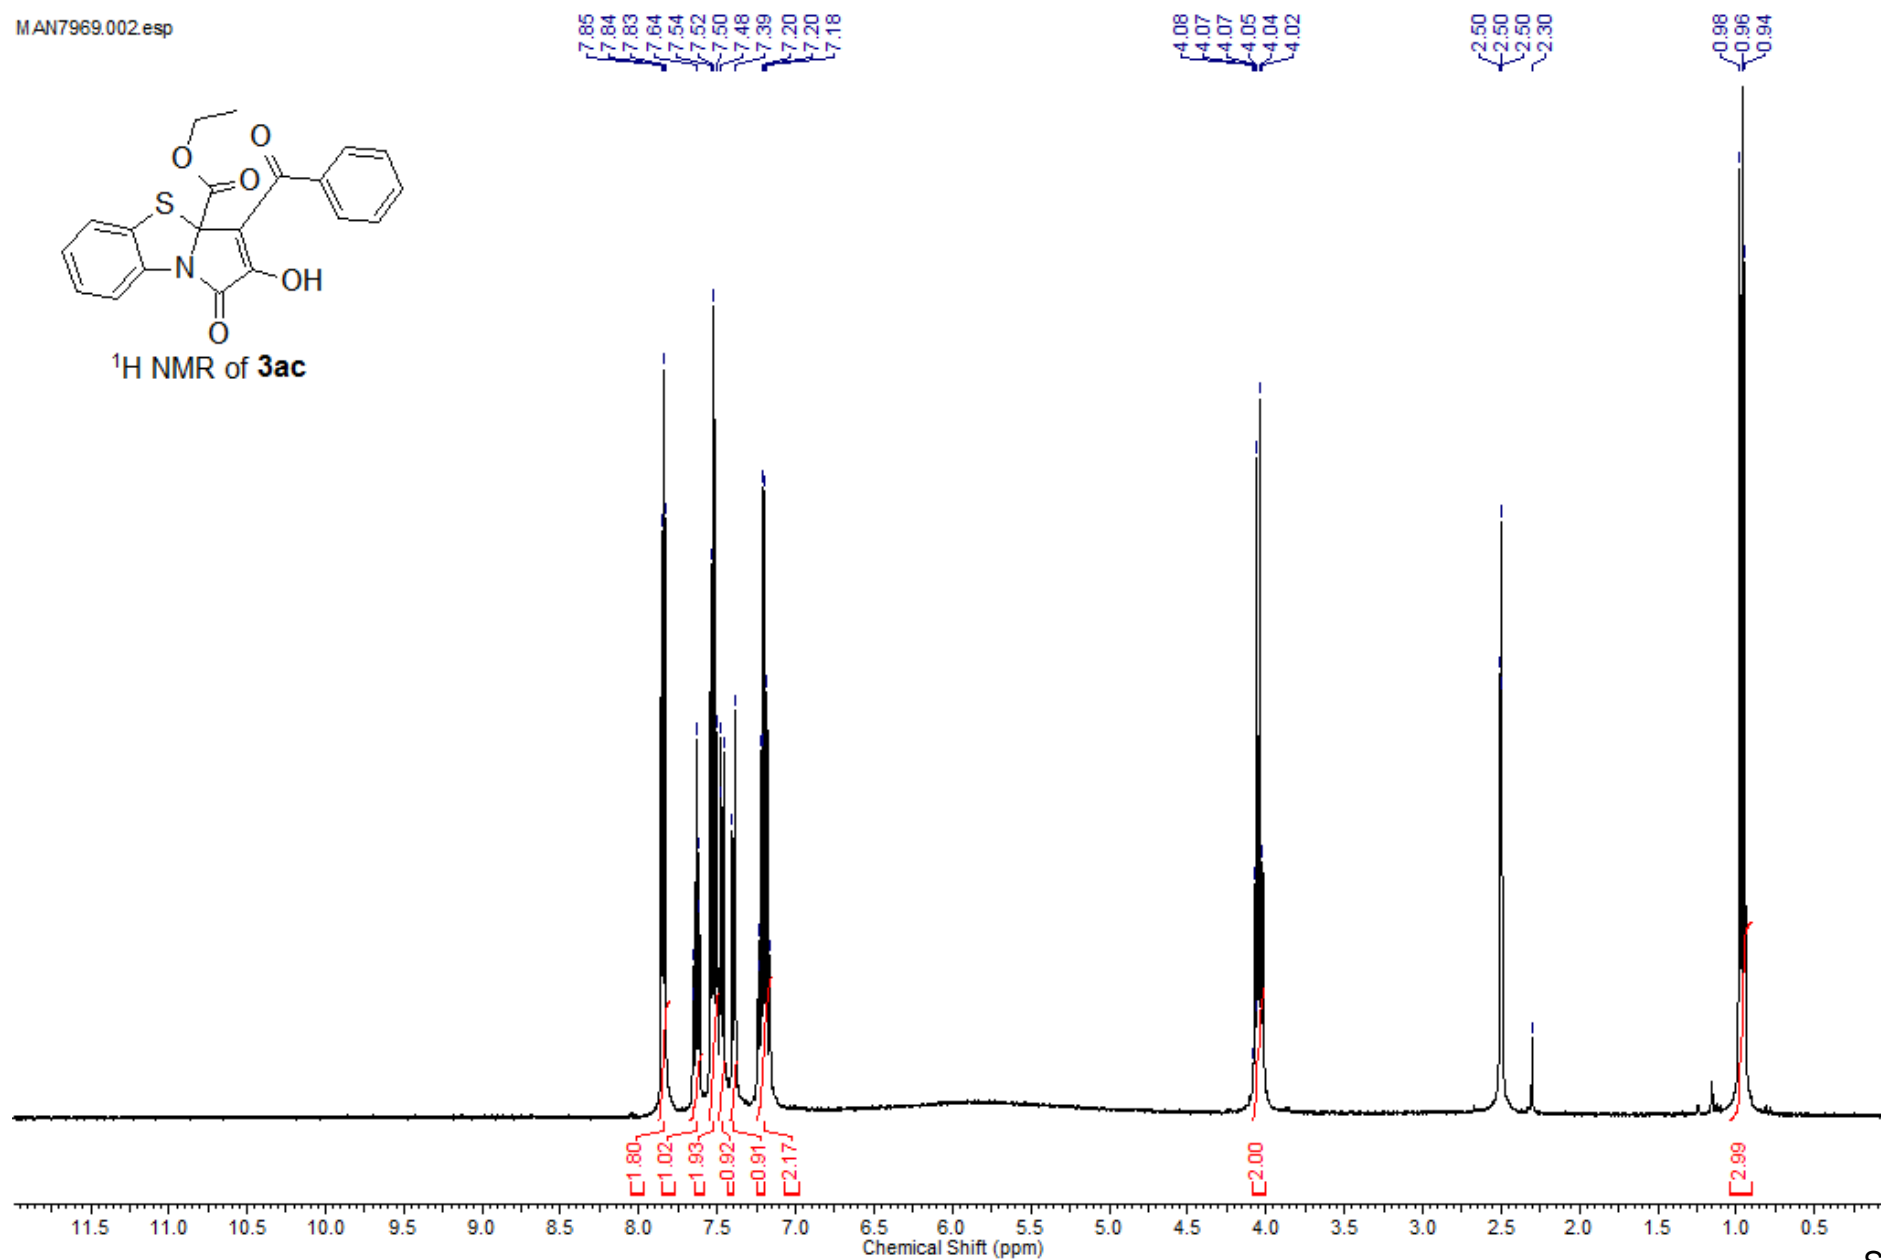

MAN7969.003.esp

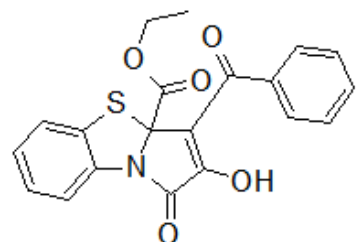

<sup>13</sup>C NMR of **3ac**

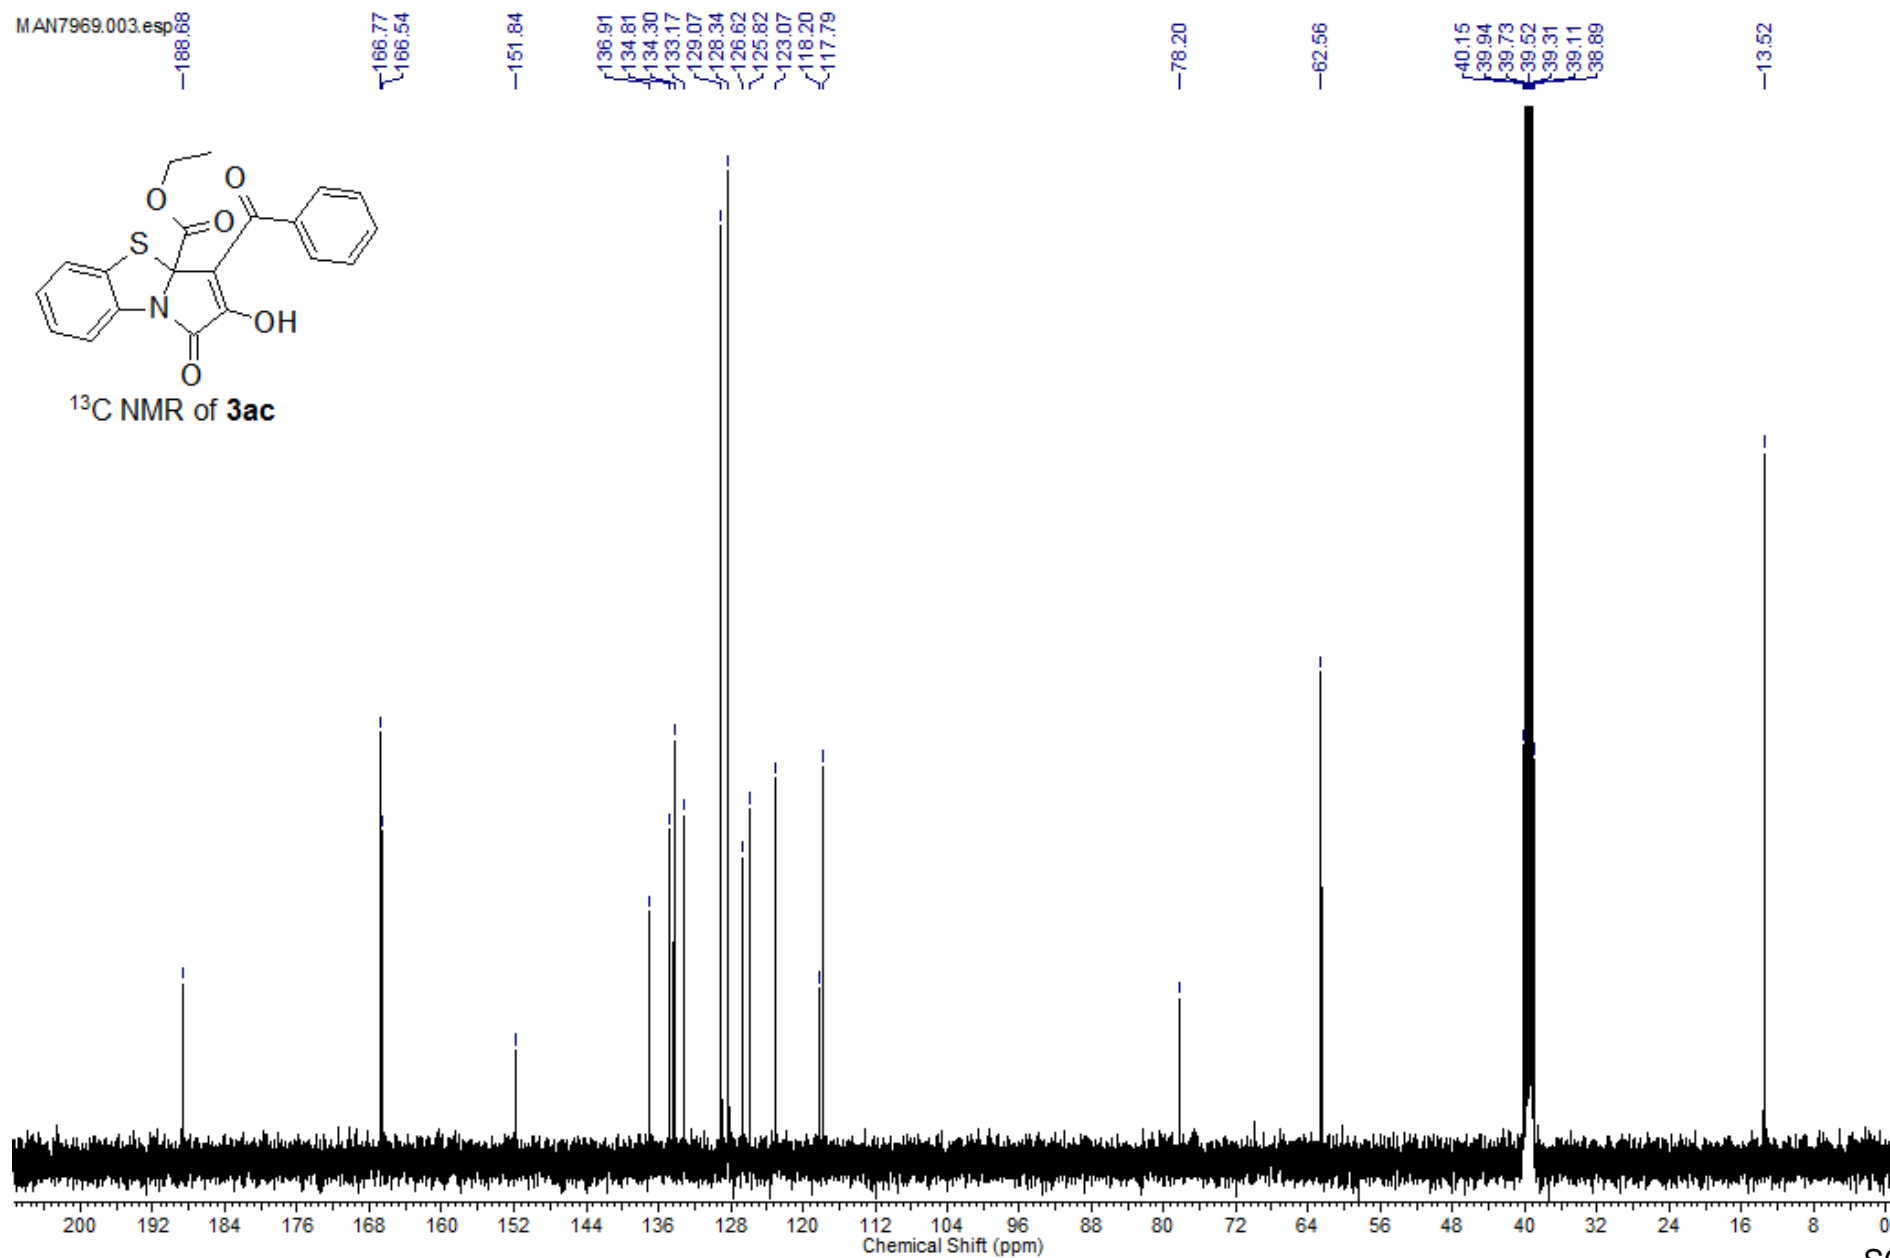

MAN7969.004.esp

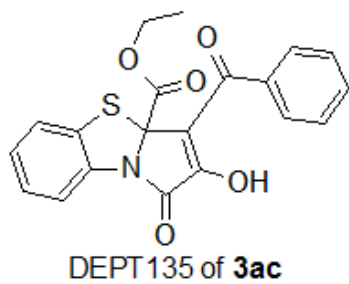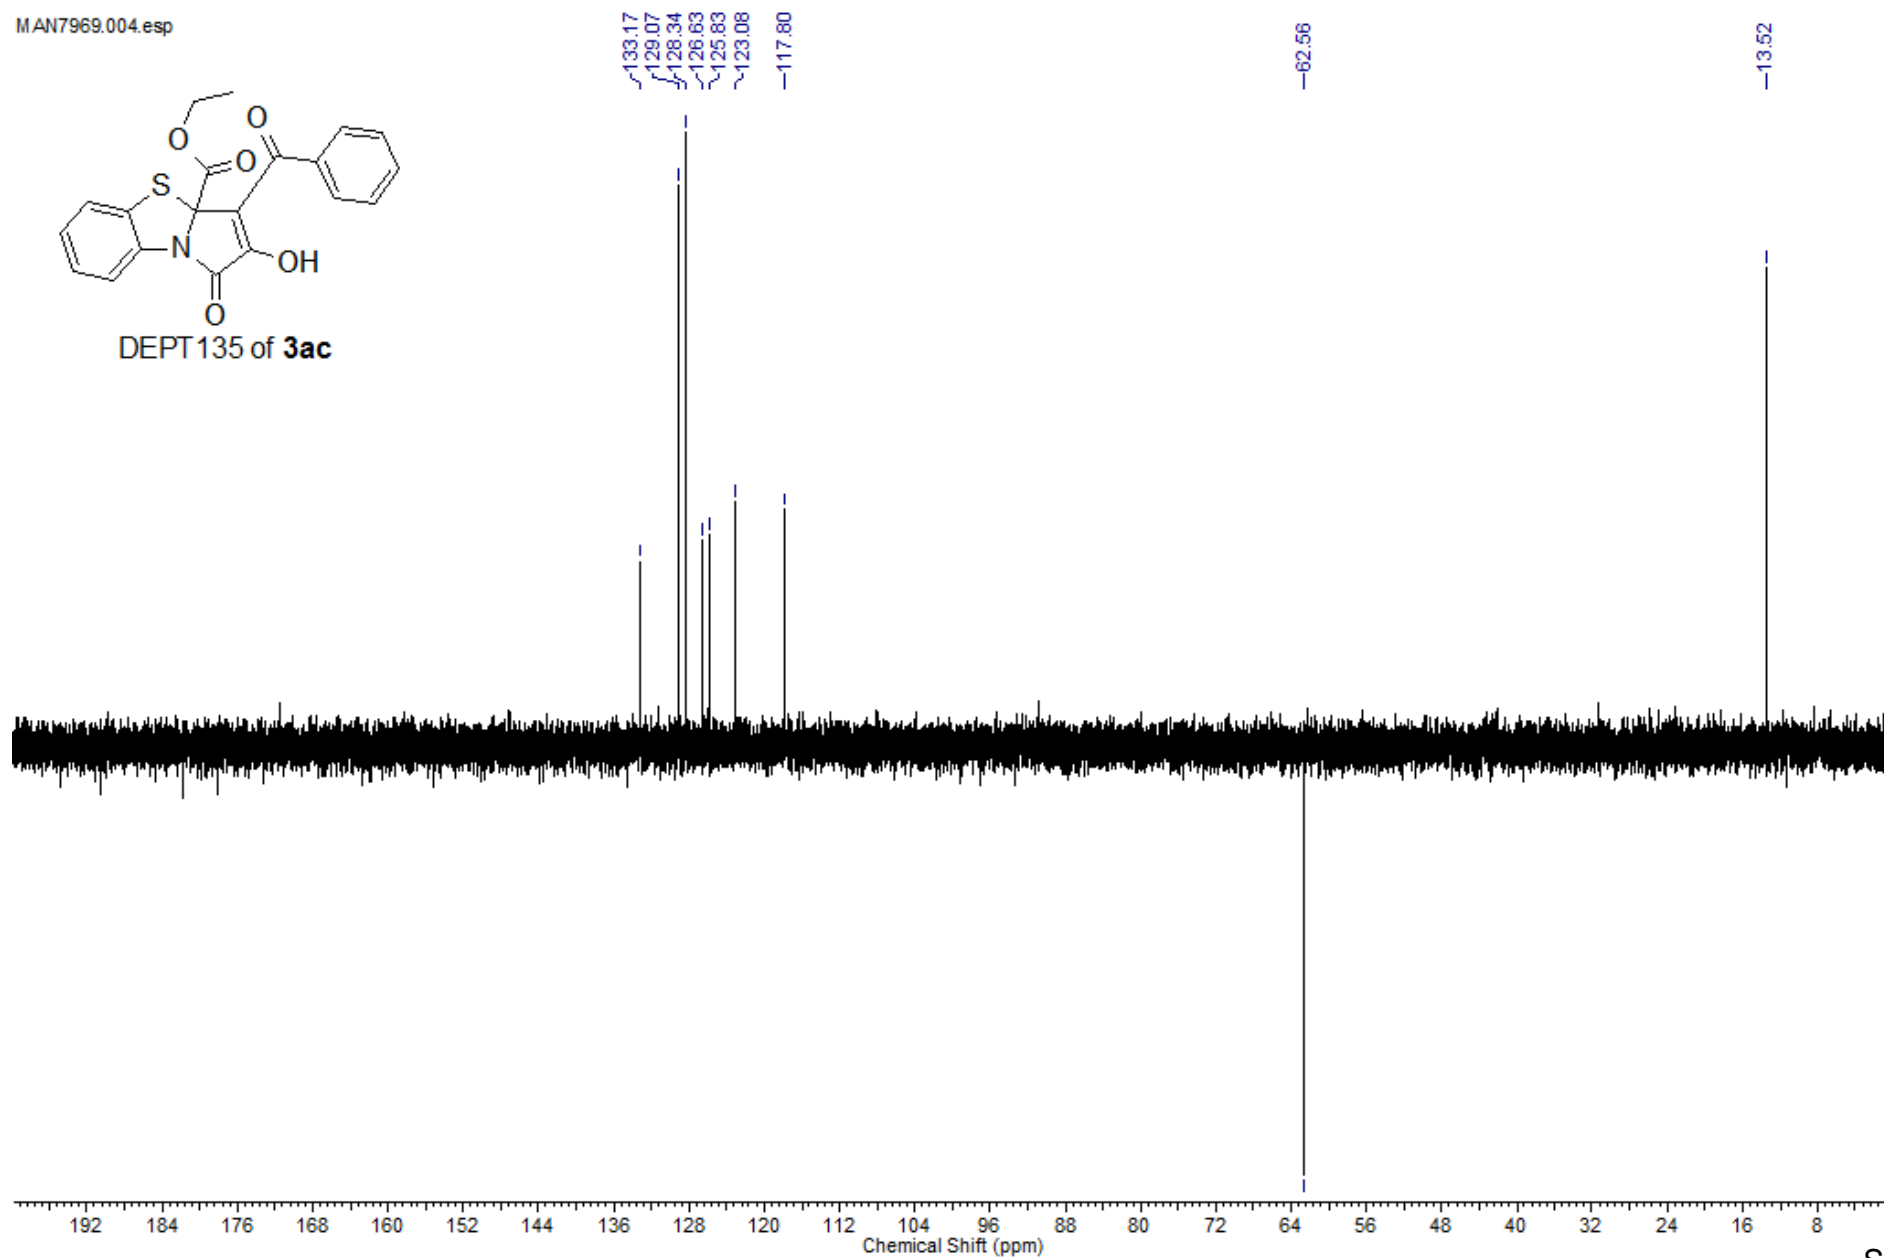

### 3-Aroyl-2-hydroxy-3a-methoxy-1*H*-pyrrolo[2,1-*c*][1,4]benzothiazine-1,4(3a*H*)-diones 5. General procedure.

A mixture of APBTT **1** (0.45 mmol), methanol (20  $\mu$ L, 0.49 mmol), and anhydrous toluene (300  $\mu$ L) is stirred in a closed microreaction V-vial at room temperature for 24 h. Then, the formed precipitate of compound **5** is filtered off, and washed with anhydrous toluene. Compounds **5** should not be dried in an oven or under vacuum, since they readily eliminate methanol.

#### 3-Benzoyl-2-hydroxy-3a-methoxy-1*H*-pyrrolo[2,1-*c*][1,4]benzothiazine-1,4(3a*H*)-dione (**5a**)

Beige solid; yield (83 mg, 50%); mp 126–128°C (toluene).

$^1\text{H}$  NMR (400 MHz, DMSO-*d*<sub>6</sub>):  $\delta$  = 8.02 (m, 1H), 7.85 (m, 2H), 7.62 (m, 1H), 7.54–7.48 (m, 4H), 7.39 (m, 1H), 3.11 (s, 3H) ppm.

$^{13}\text{C}$  NMR (100 MHz, DMSO-*d*<sub>6</sub>):  $\delta$  = 189.4, 188.2, 162.5, 152.3, 137.5, 132.7, 129.2 (2C), 128.1 (2C), 128.0, 127.8, 126.6, 126.5, 123.0, 122.6, 108.7, 90.7, 50.1 ppm.

IR (mineral oil): 3180, 1747, 1700, 1642  $\text{cm}^{-1}$ .

EA: Found: C, 62.36; H, 3.71; N, 3.86. Calc. for C<sub>19</sub>H<sub>13</sub>NO<sub>5</sub>S: C, 62.12; H, 3.57; N, 3.81.

#### 2-Hydroxy-3a-methoxy-3-(4-methylbenzoyl)-1*H*-pyrrolo[2,1-*c*][1,4]benzothiazine-1,4(3a*H*)-dione (**5b**)

Beige solid; yield (129 mg, 75%); mp 107–109°C (toluene).

$^1\text{H}$  NMR (400 MHz, DMSO-*d*<sub>6</sub>):  $\delta$  = 8.02 (m, 1H), 7.75 (m, 2H), 7.53 (m, 2H), 7.39 (m, 1H), 7.31 (m, 2H), 3.10 (s, 3H), 2.40 (s, 3H) ppm.

$^{13}\text{C}$  NMR (100 MHz, DMSO-*d*<sub>6</sub>):  $\delta$  = 189.0, 188.3, 162.6, 151.7, 143.2, 135.0, 129.4 (2C), 128.7 (2C), 128.0, 127.8, 126.6, 126.5, 123.0, 122.6, 109.1, 90.7, 50.1, 21.1 ppm.

IR (mineral oil): 3182, 1744, 1699, 1633  $\text{cm}^{-1}$ .

EA: Found: C, 65.15; H, 4.36; N, 3.44. Calc. for 3C<sub>20</sub>H<sub>15</sub>NO<sub>5</sub>S · C<sub>7</sub>H<sub>8</sub>: C, 65.09; H, 4.32; N, 3.40.

#### 3-(4-Chlorobenzoyl)-2-Hydroxy-3a-methoxy-1*H*-pyrrolo[2,1-*c*][1,4]benzothiazine-1,4(3a*H*)-dione (**5e**)

White solid; yield (136 mg, 75%); mp 113–115°C (toluene).

$^1\text{H}$  NMR (400 MHz, DMSO-*d*<sub>6</sub>):  $\delta$  = 8.01 (m, 1H), 7.87 (m, 2H), 7.58–7.49 (m, 4H), 7.39 (m, 1H), 3.09 (s, 3H) ppm.

$^{13}\text{C}$  NMR (100 MHz, DMSO-*d*<sub>6</sub>):  $\delta$  = 188.3, 188.2, 162.5, 152.9, 137.7, 136.3, 131.0 (2C), 128.3 (2C), 128.0, 127.7, 126.6, 126.5, 122.99, 122.6, 108.2, 90.6, 50.1 ppm.

IR (mineral oil): 3193, 1744, 1701, 1633  $\text{cm}^{-1}$ .

EA: Found: C, 59.31; H, 3.46; N, 3.32. Calc. for 3C<sub>19</sub>H<sub>12</sub>ClNO<sub>5</sub>S · C<sub>7</sub>H<sub>8</sub>: C, 59.24; H, 3.42; N, 3.24.





MAN7084.002.e9

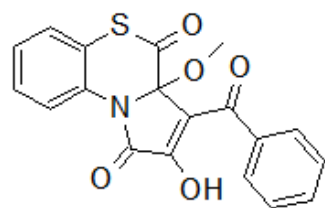

<sup>13</sup>C NMR of 5a

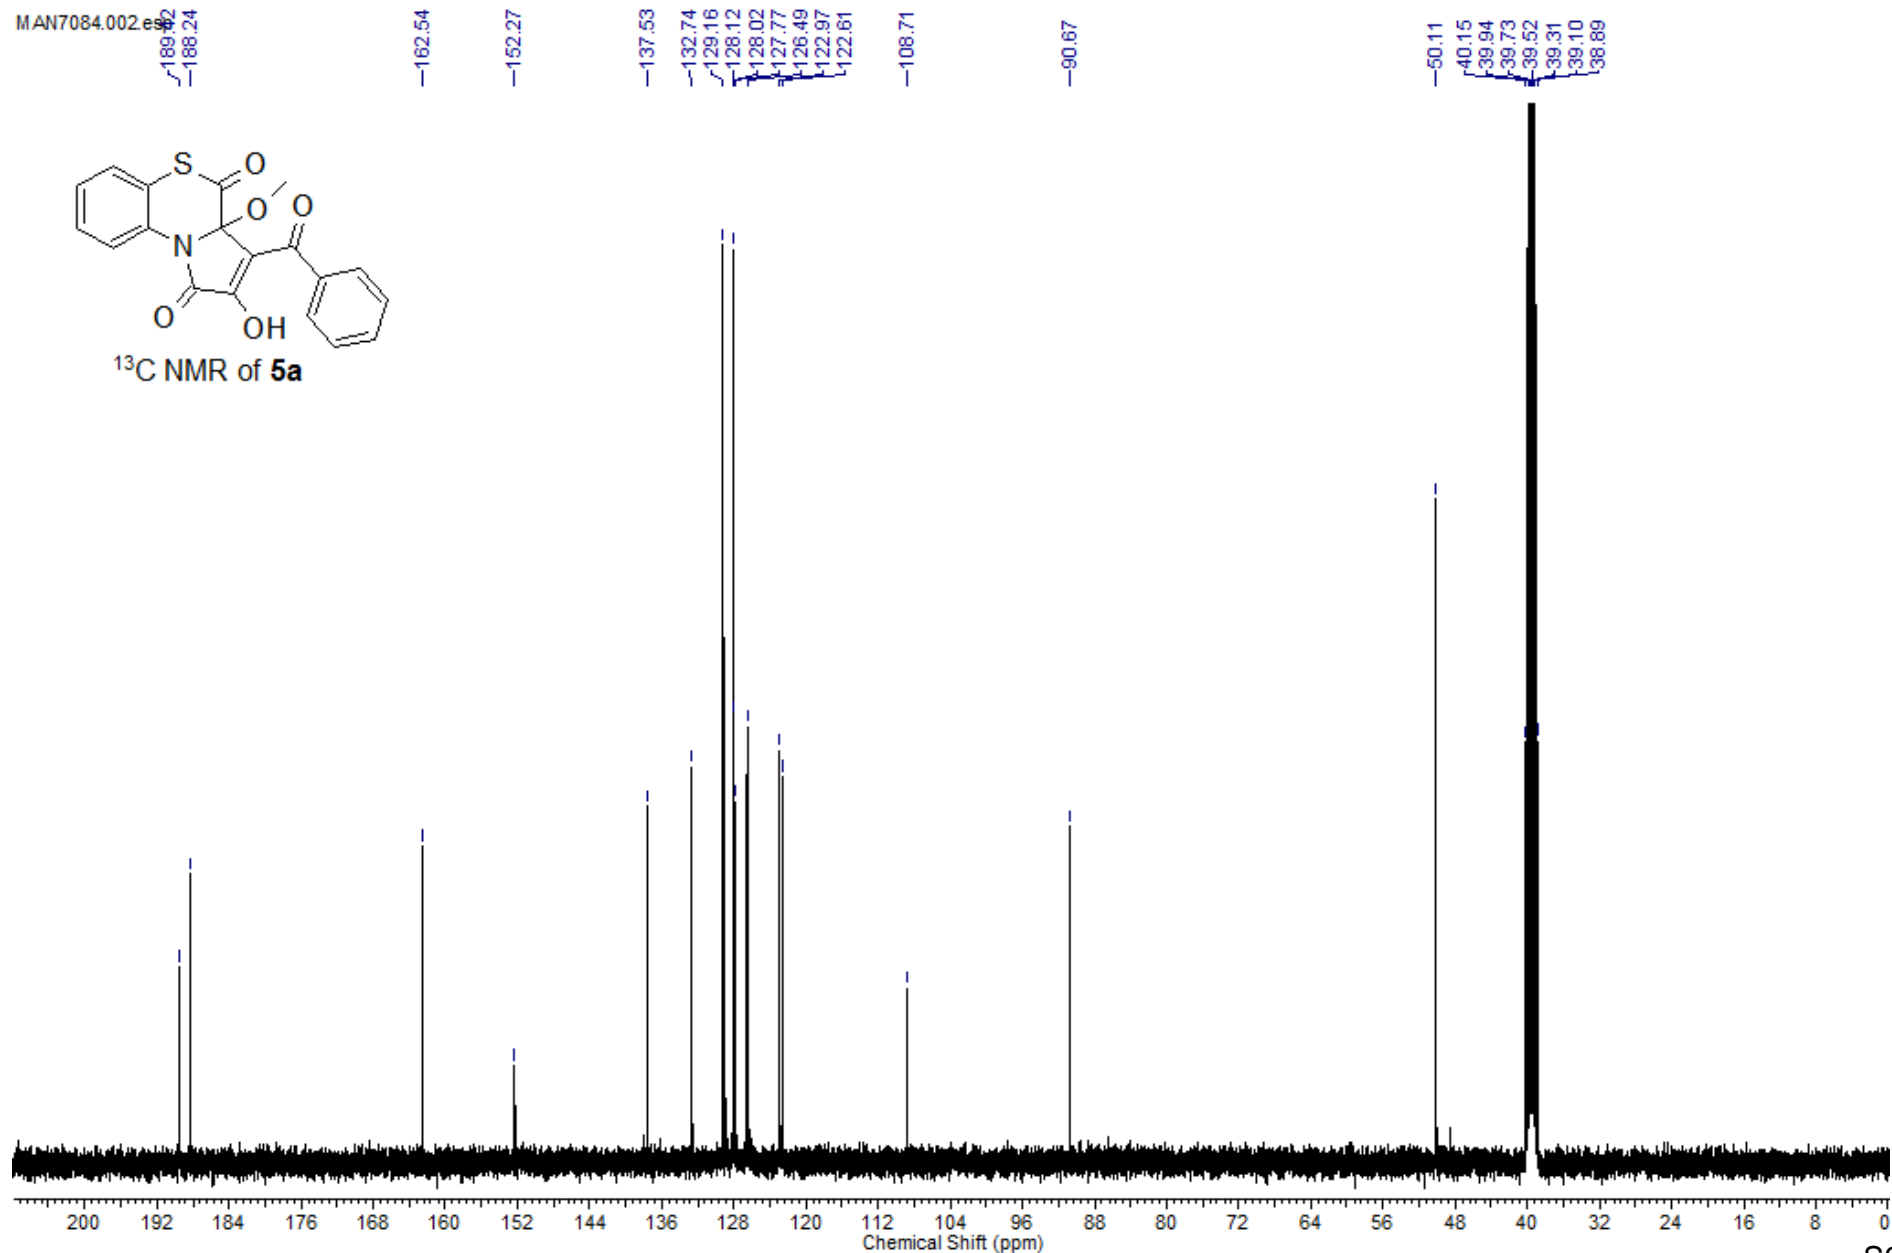

MAN7084.003.esp

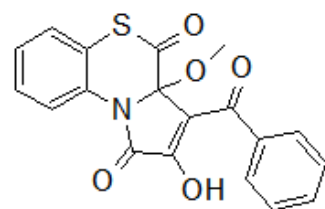

DEPT 135 of **5a**

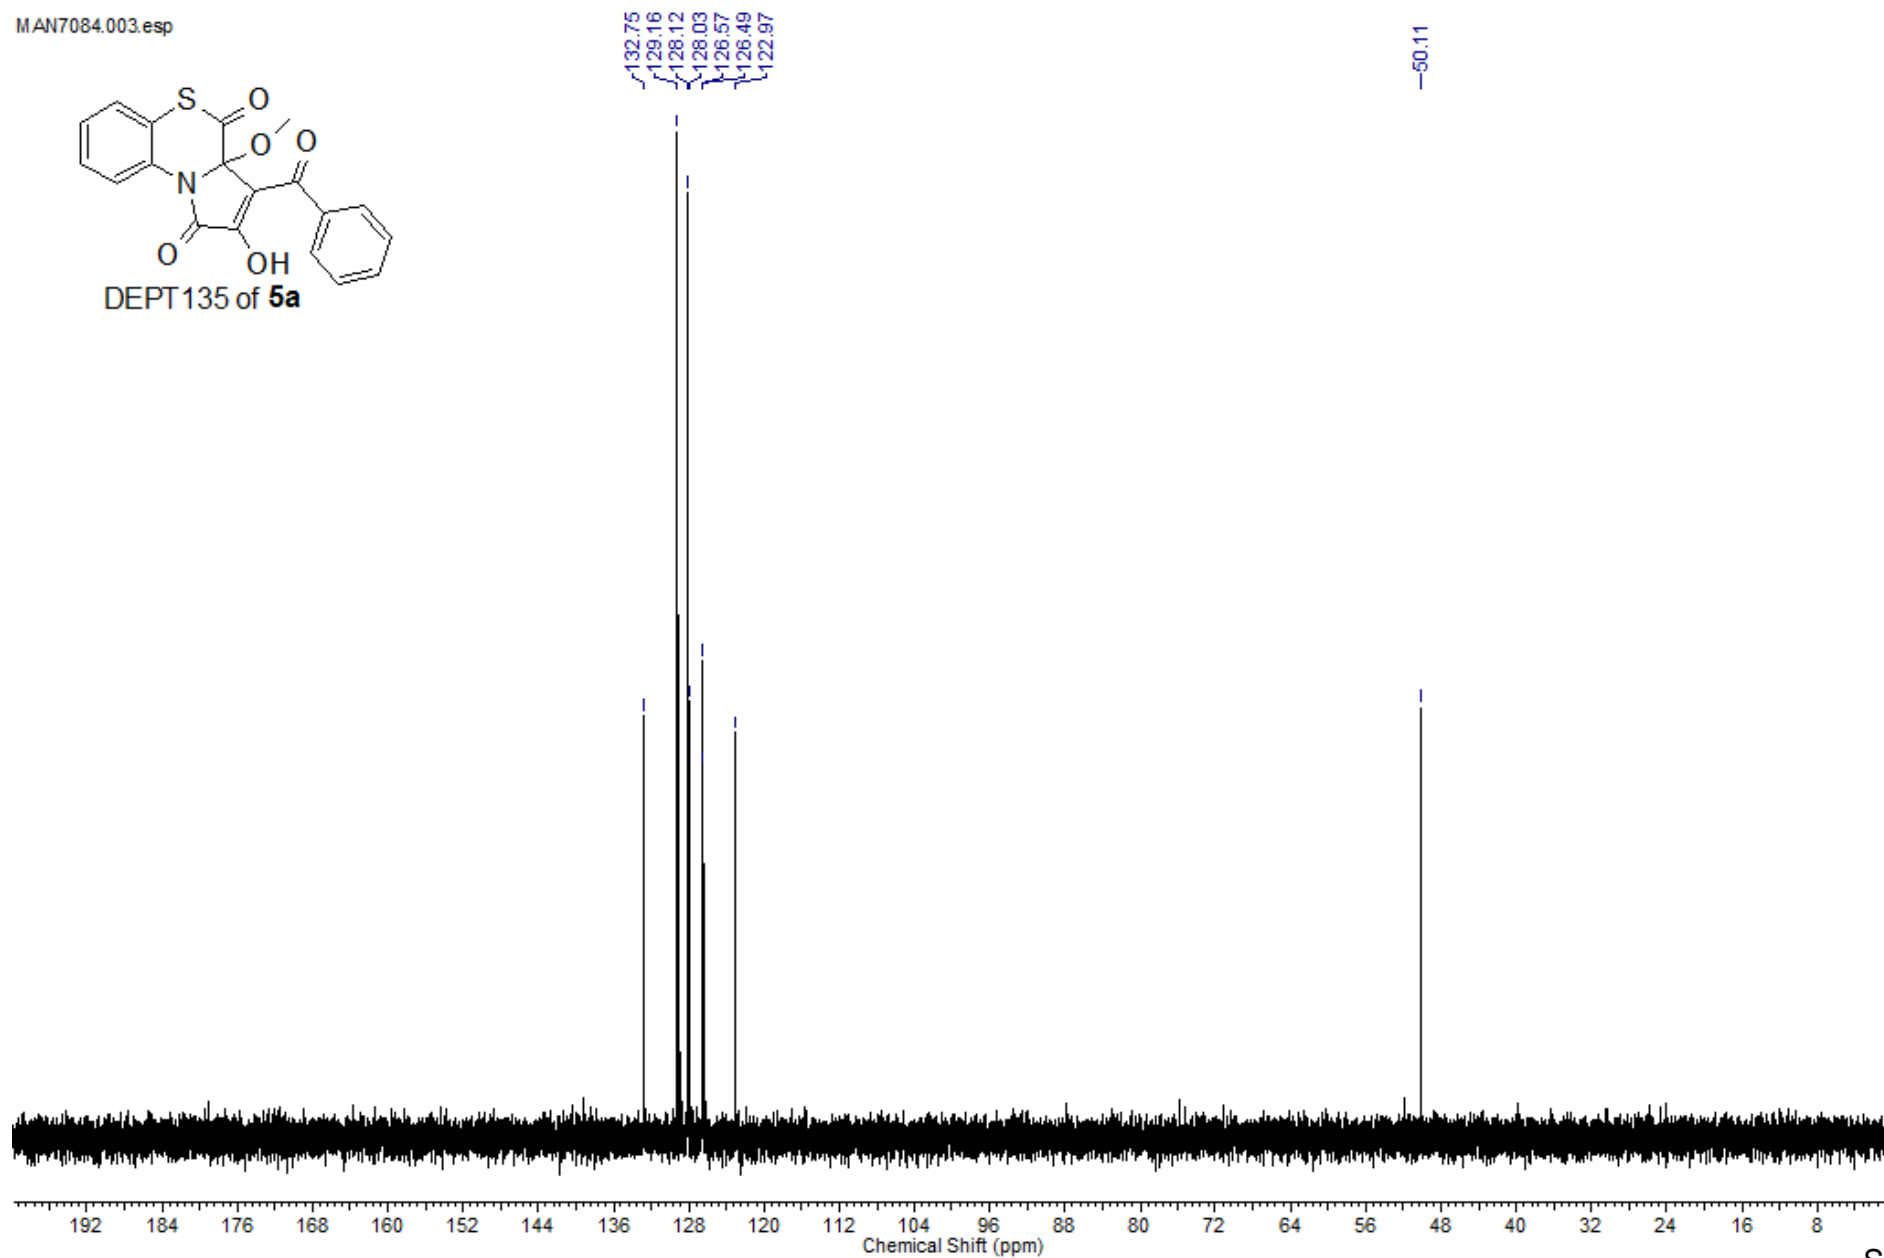

MAN7143.001.esp

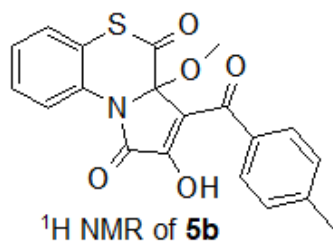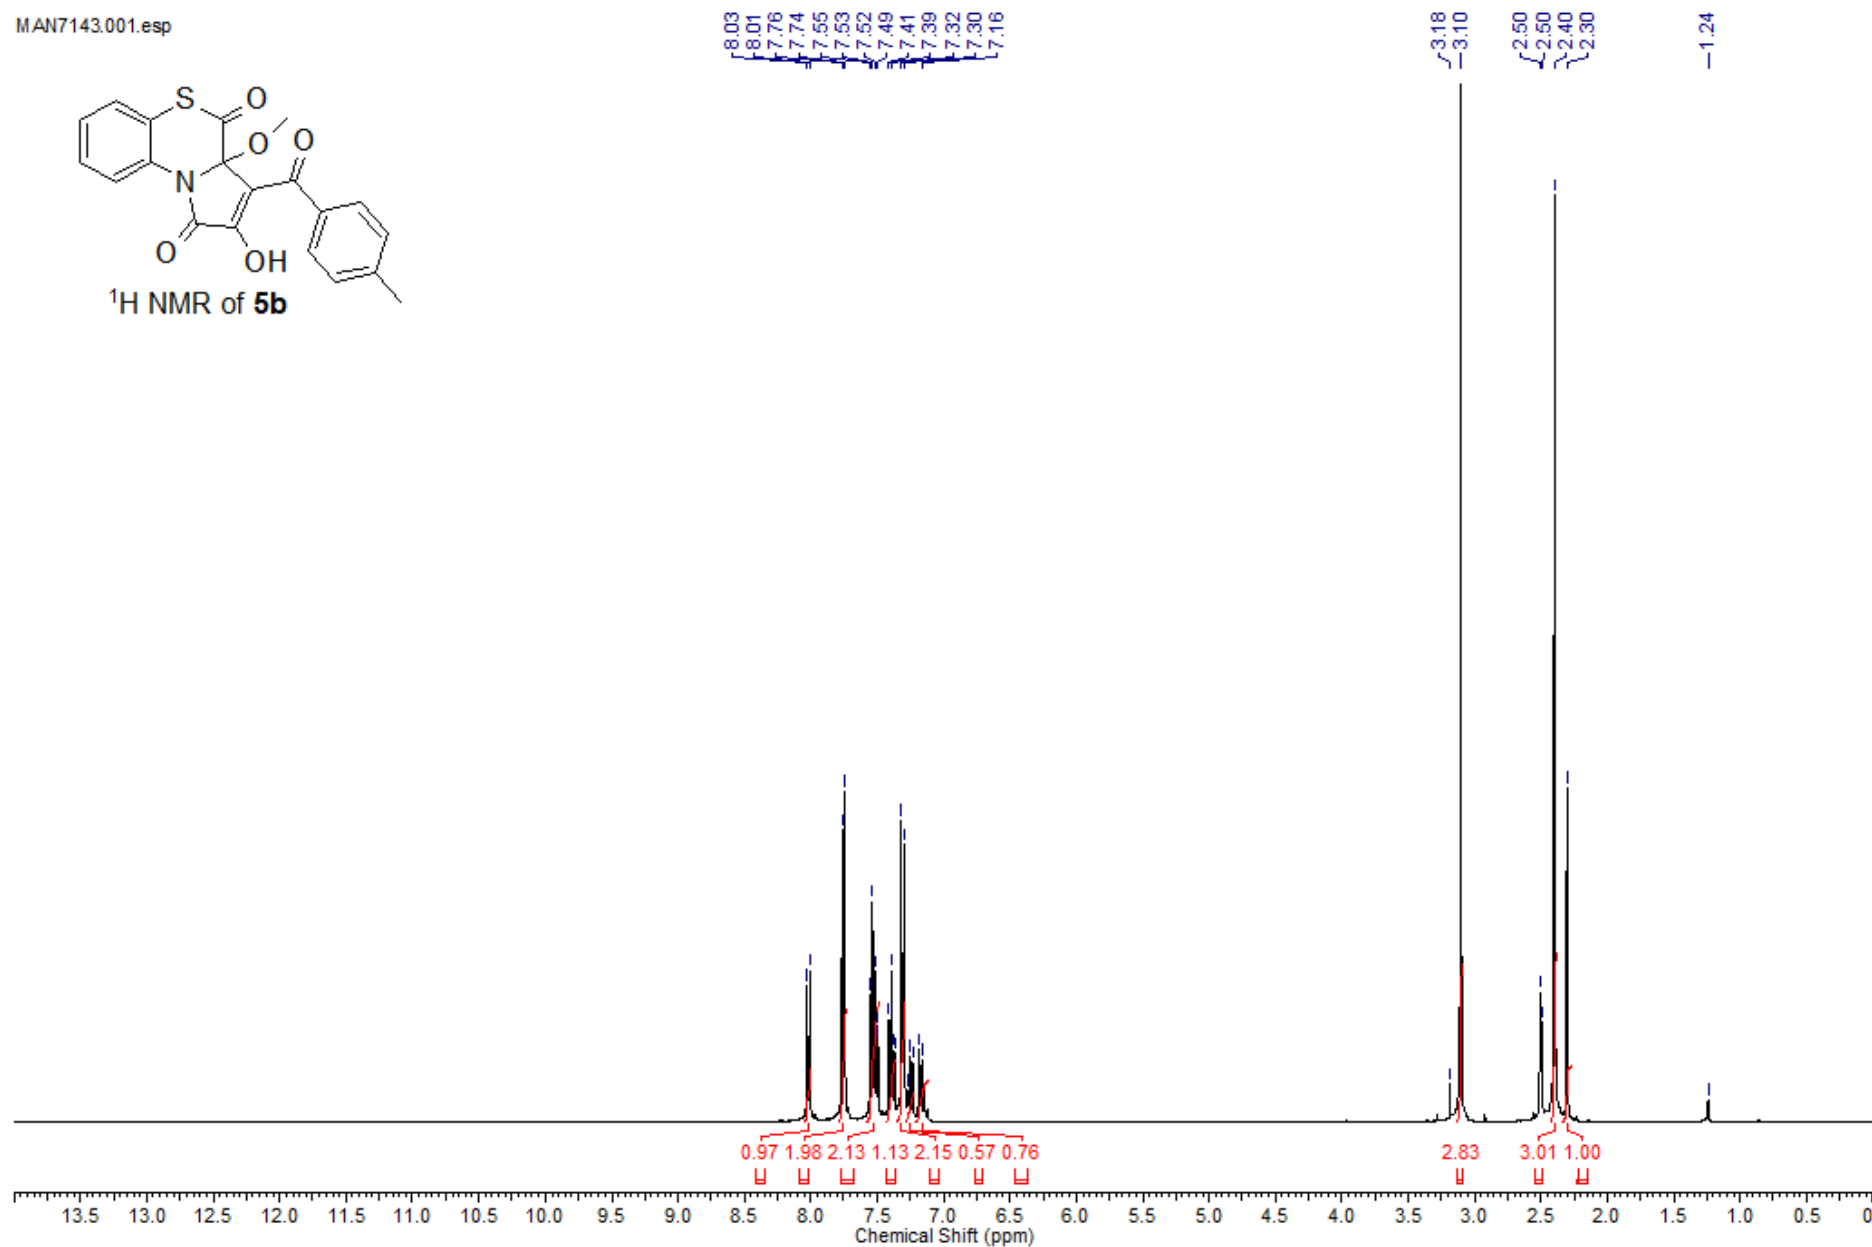

MAN7143.002.e

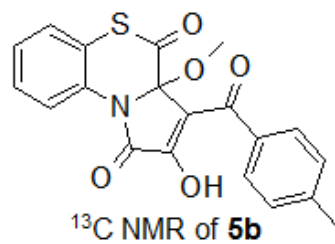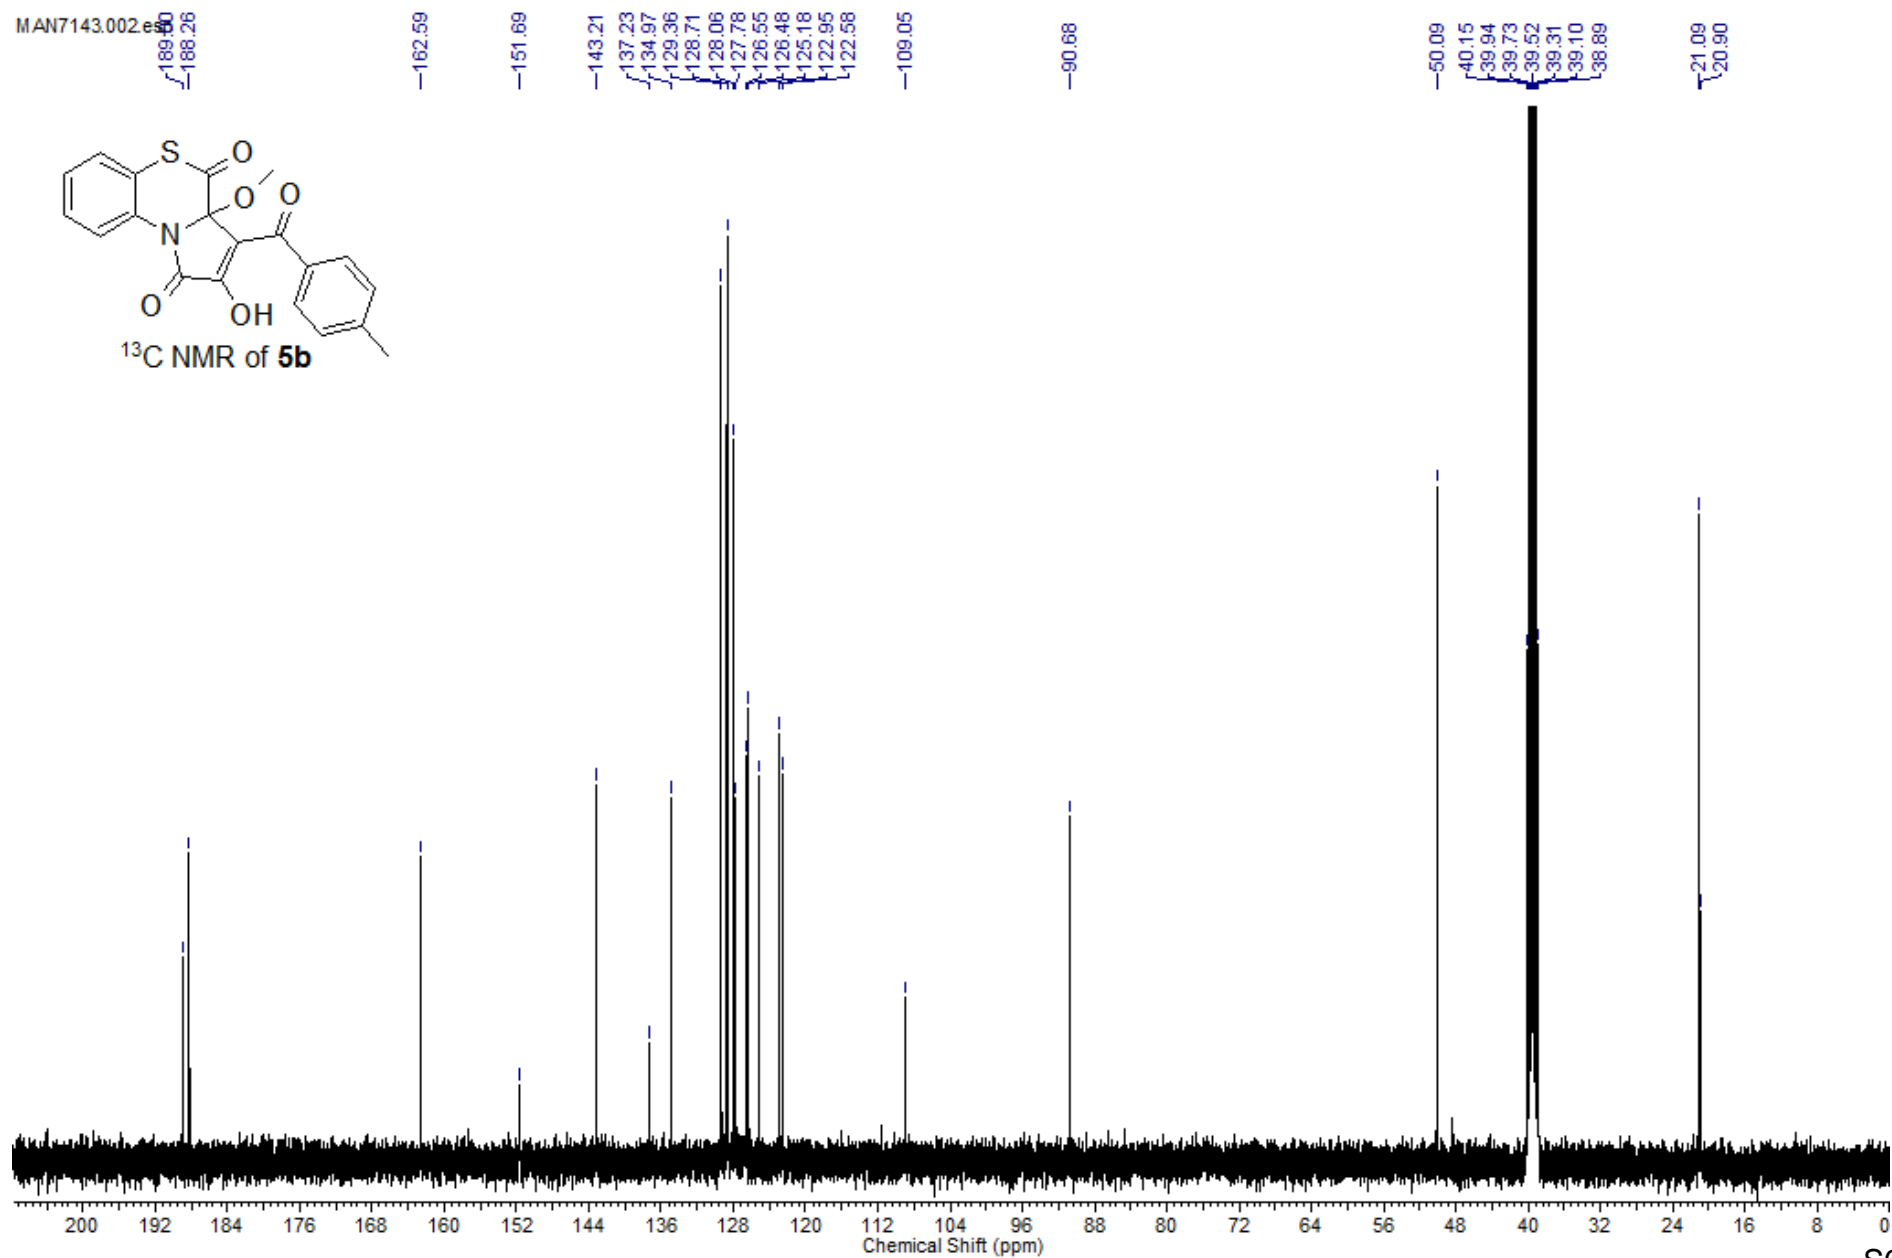

MAN7143.003.esp

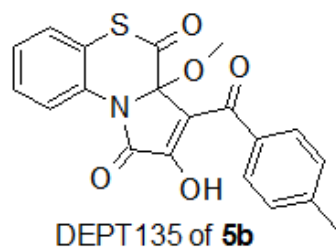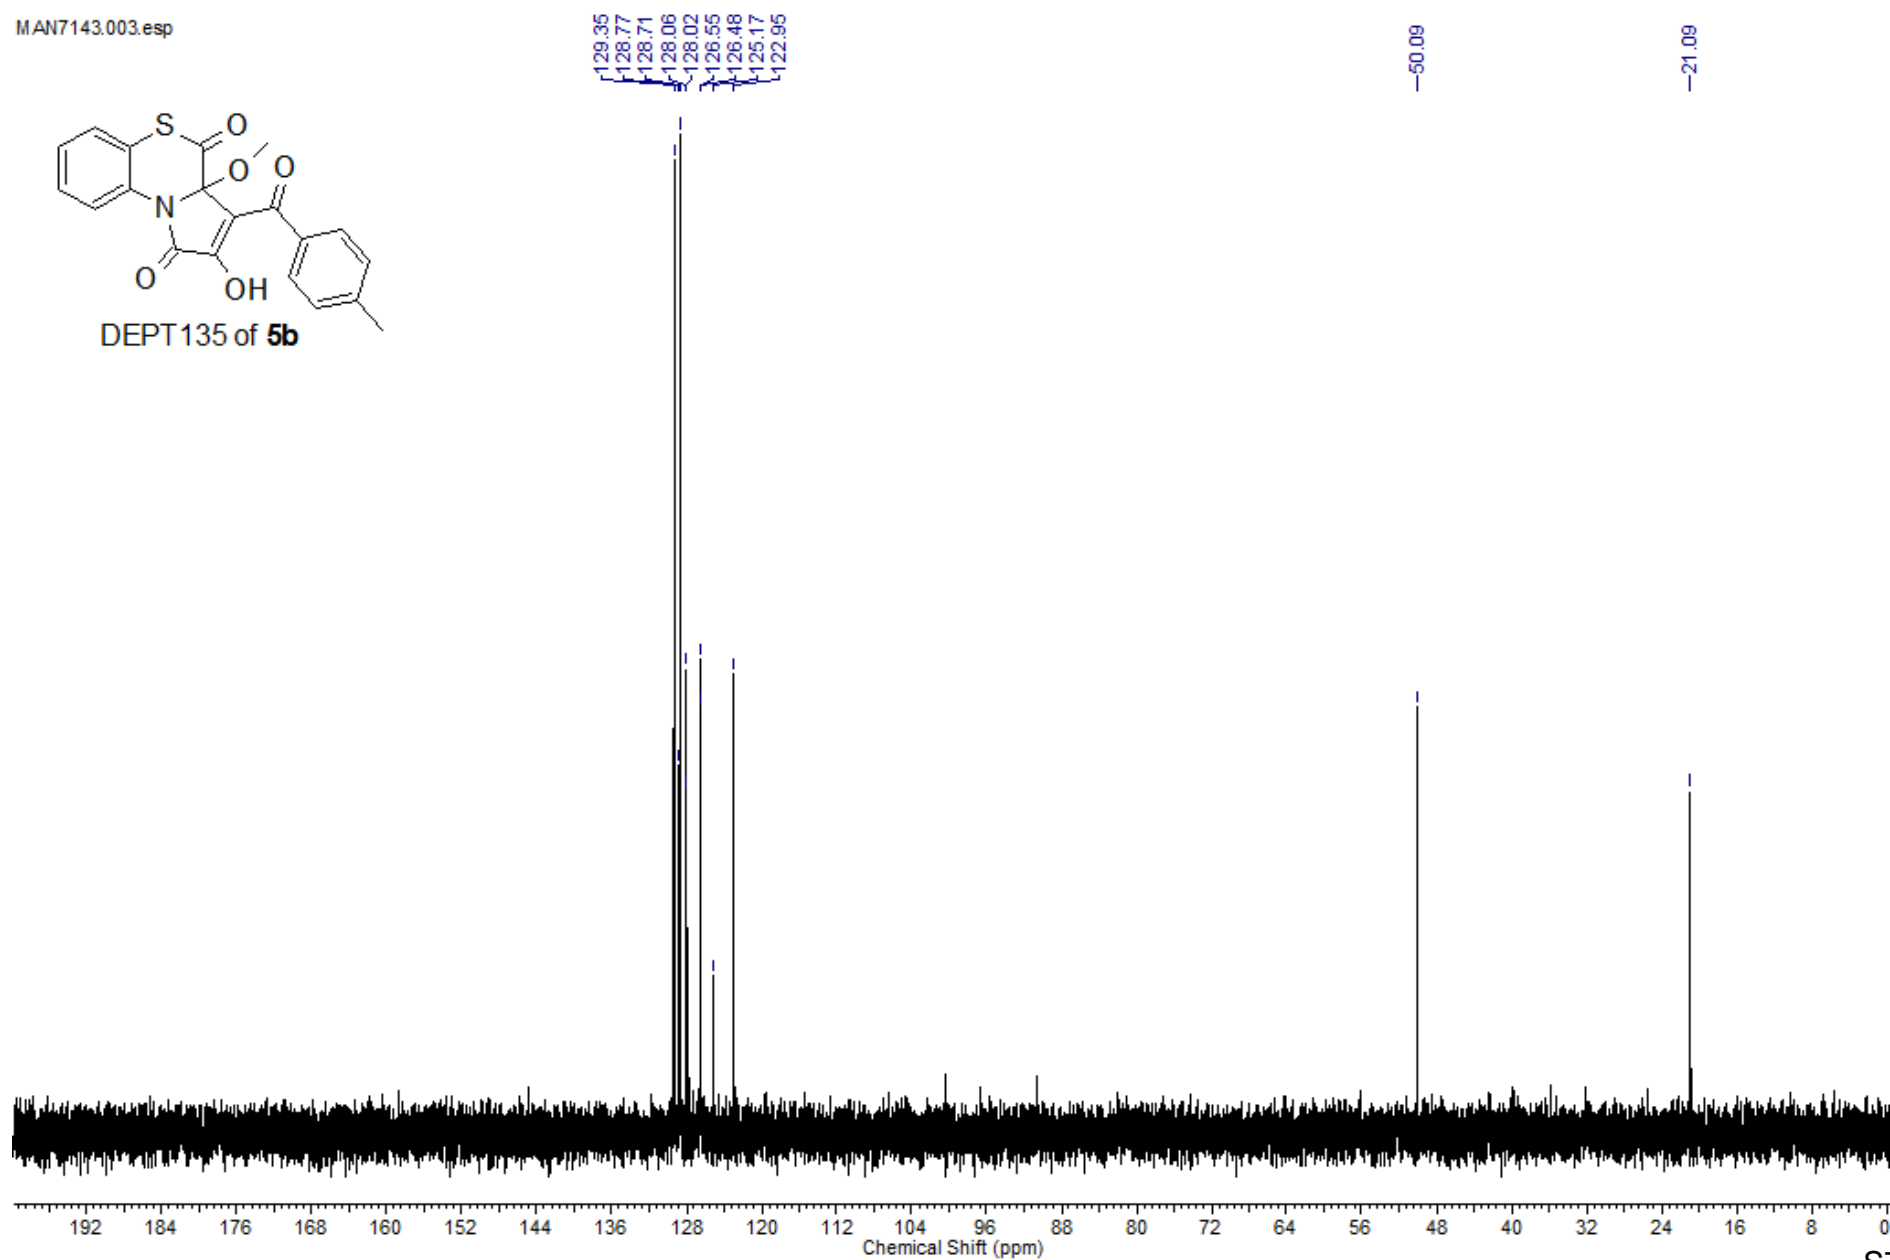

MAN7196.001.esp

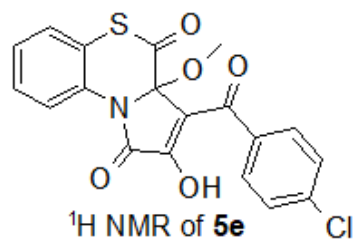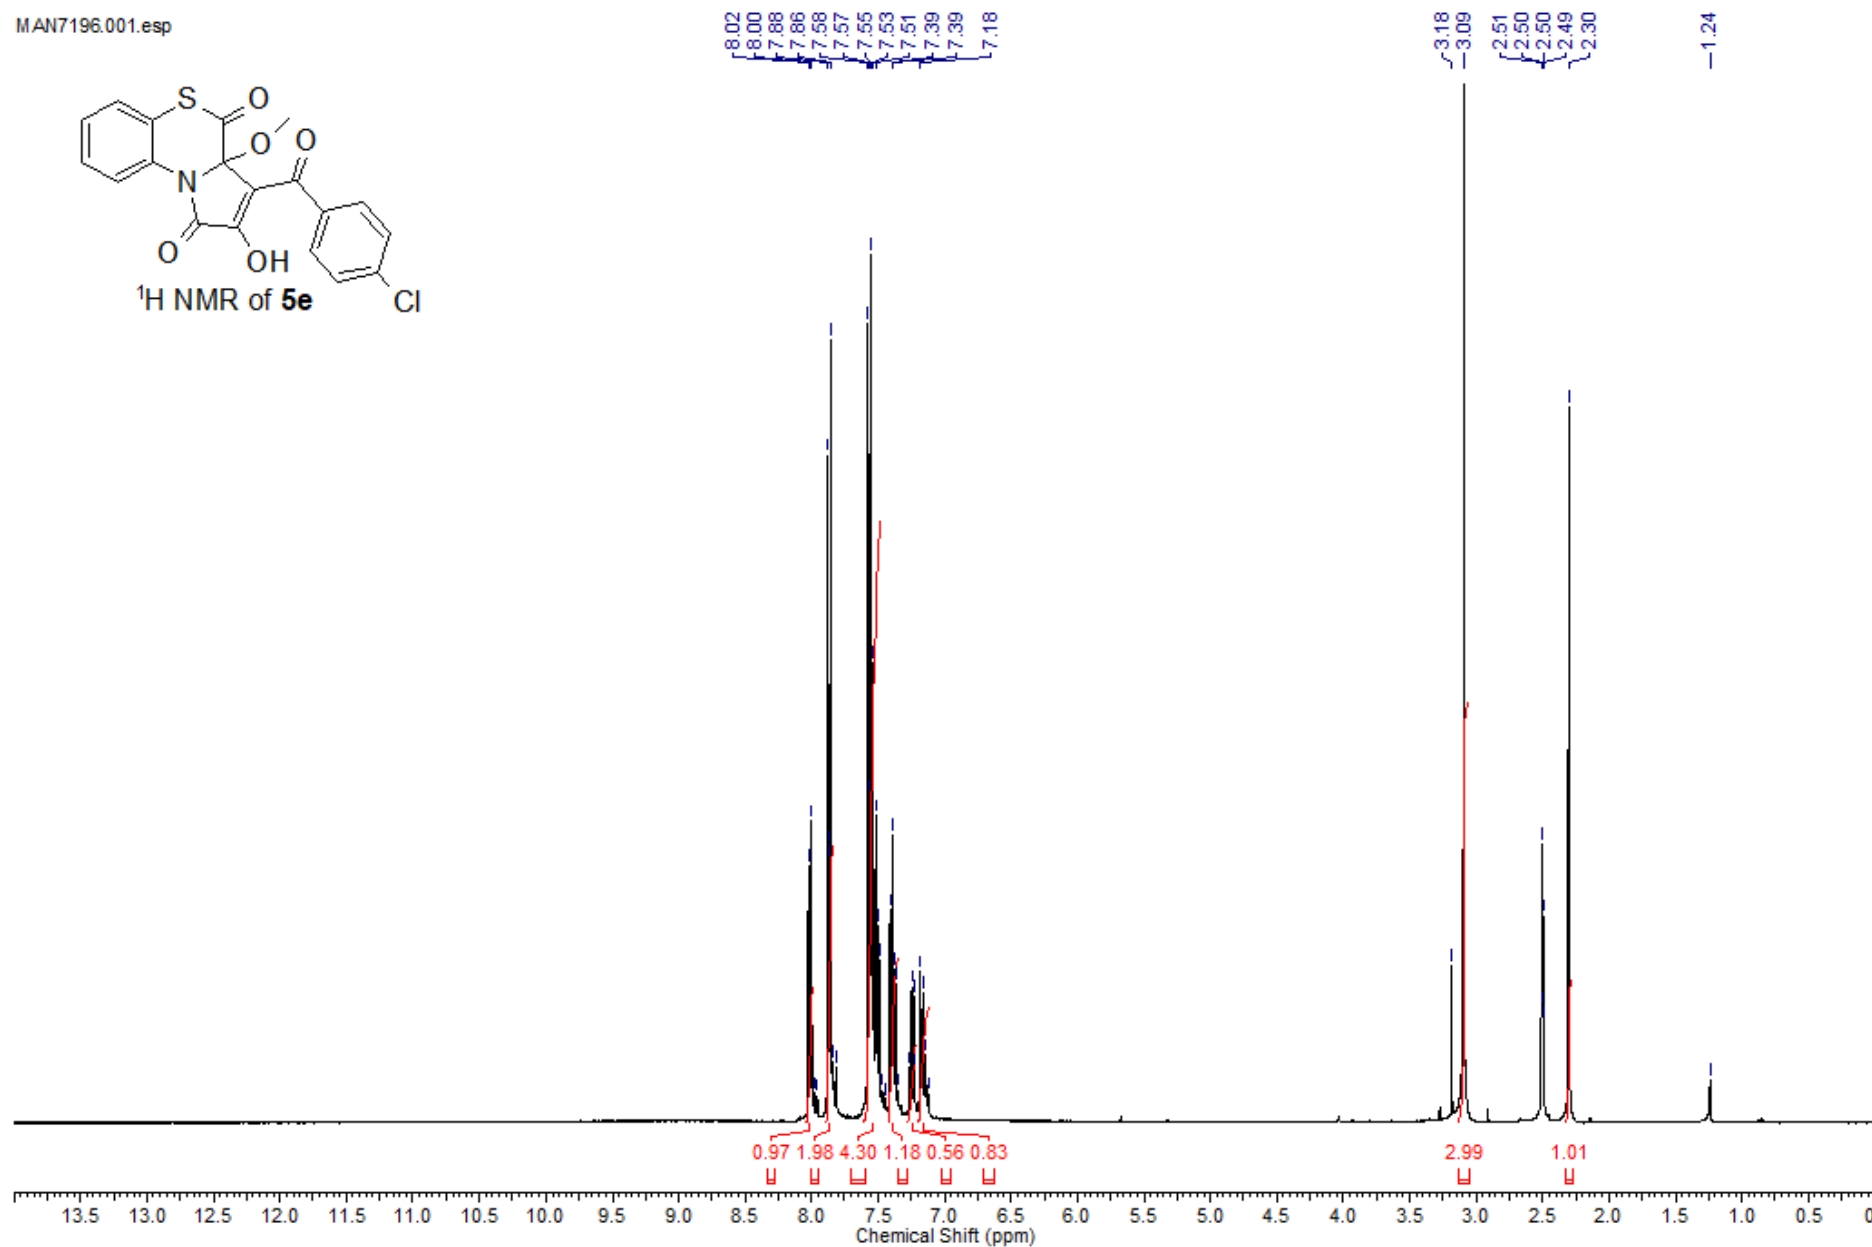

MAN7196.002.esp

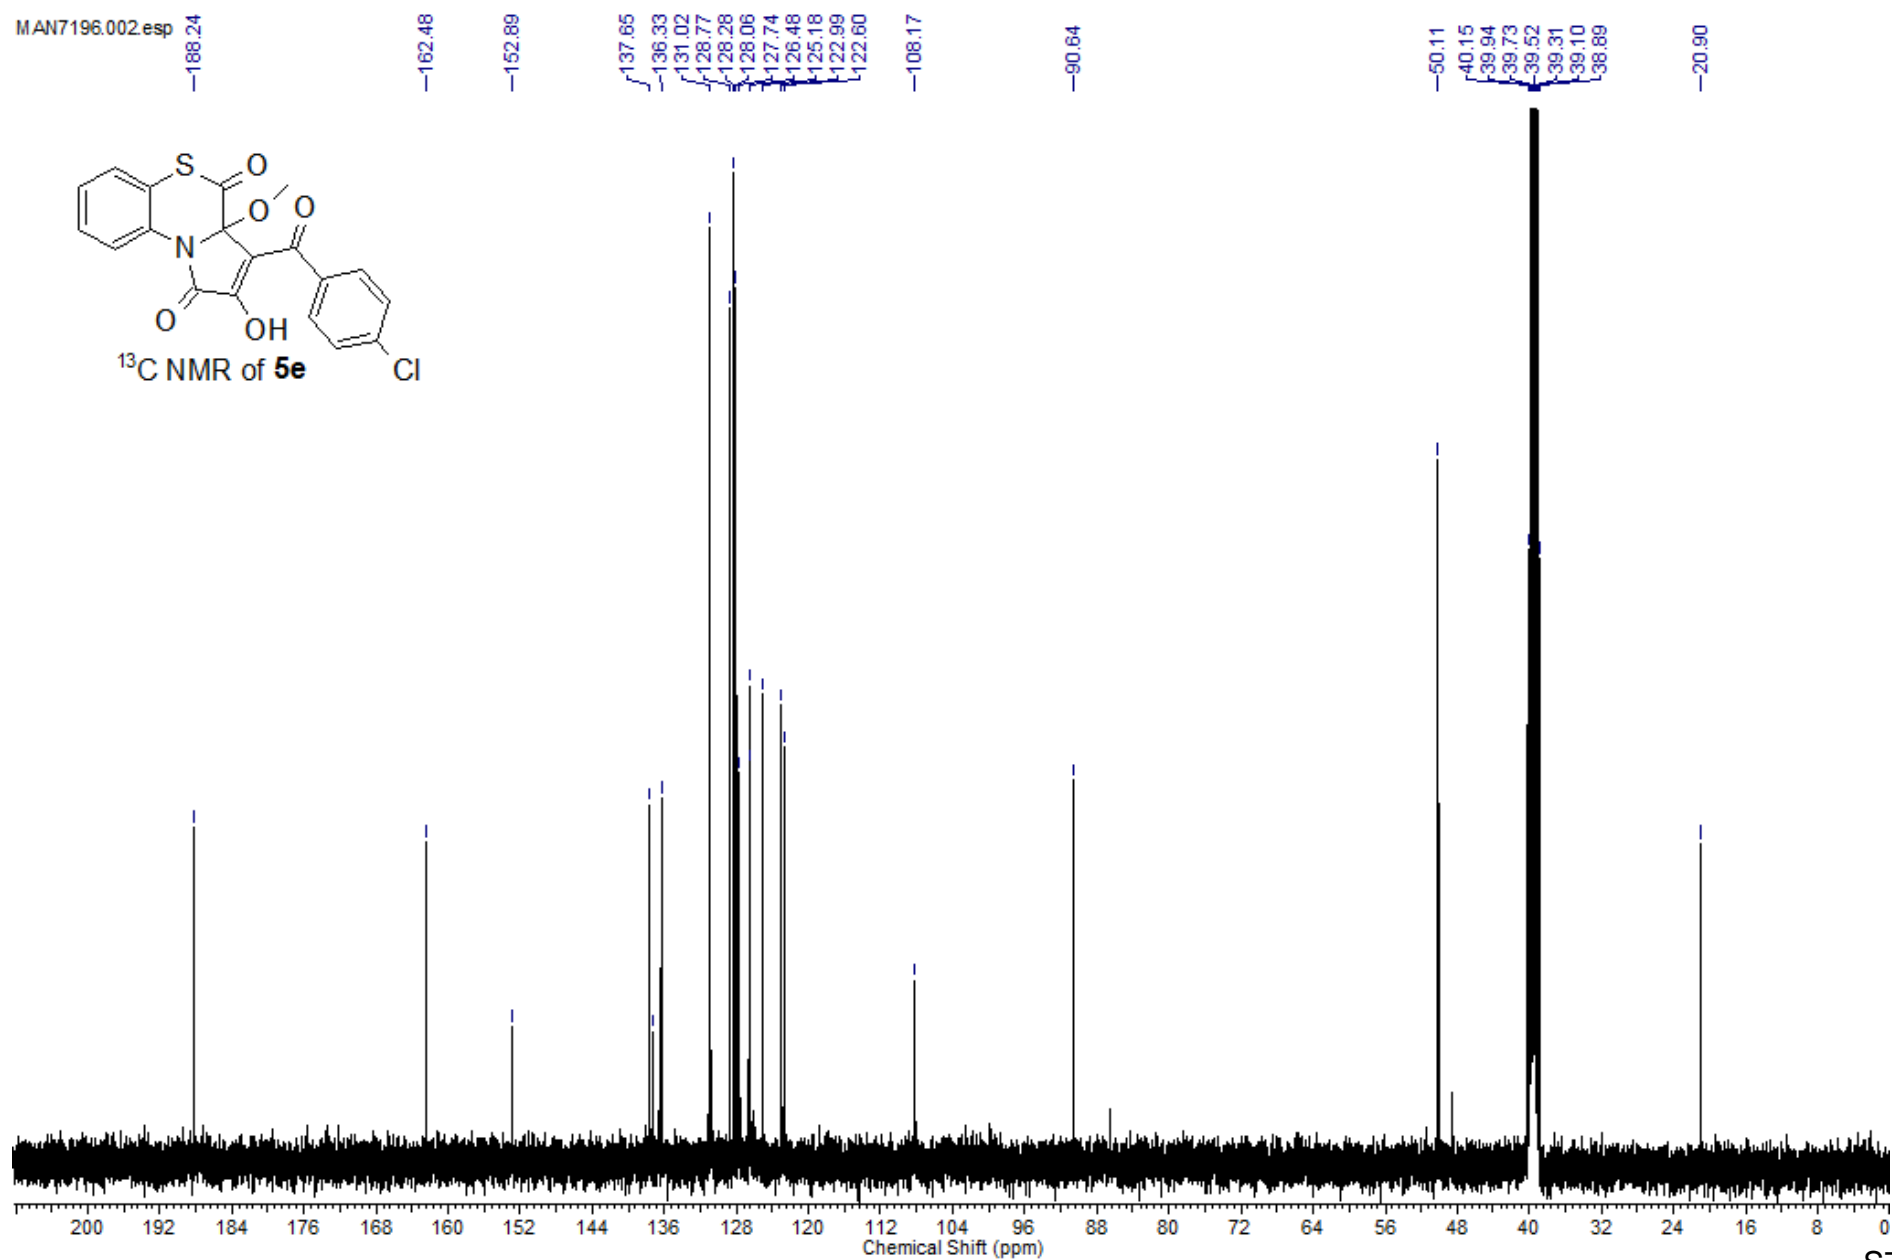



MAN7196.003.esp

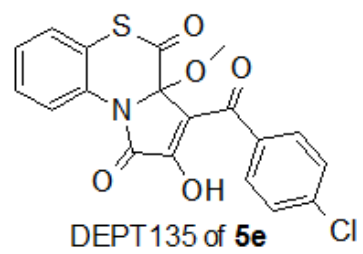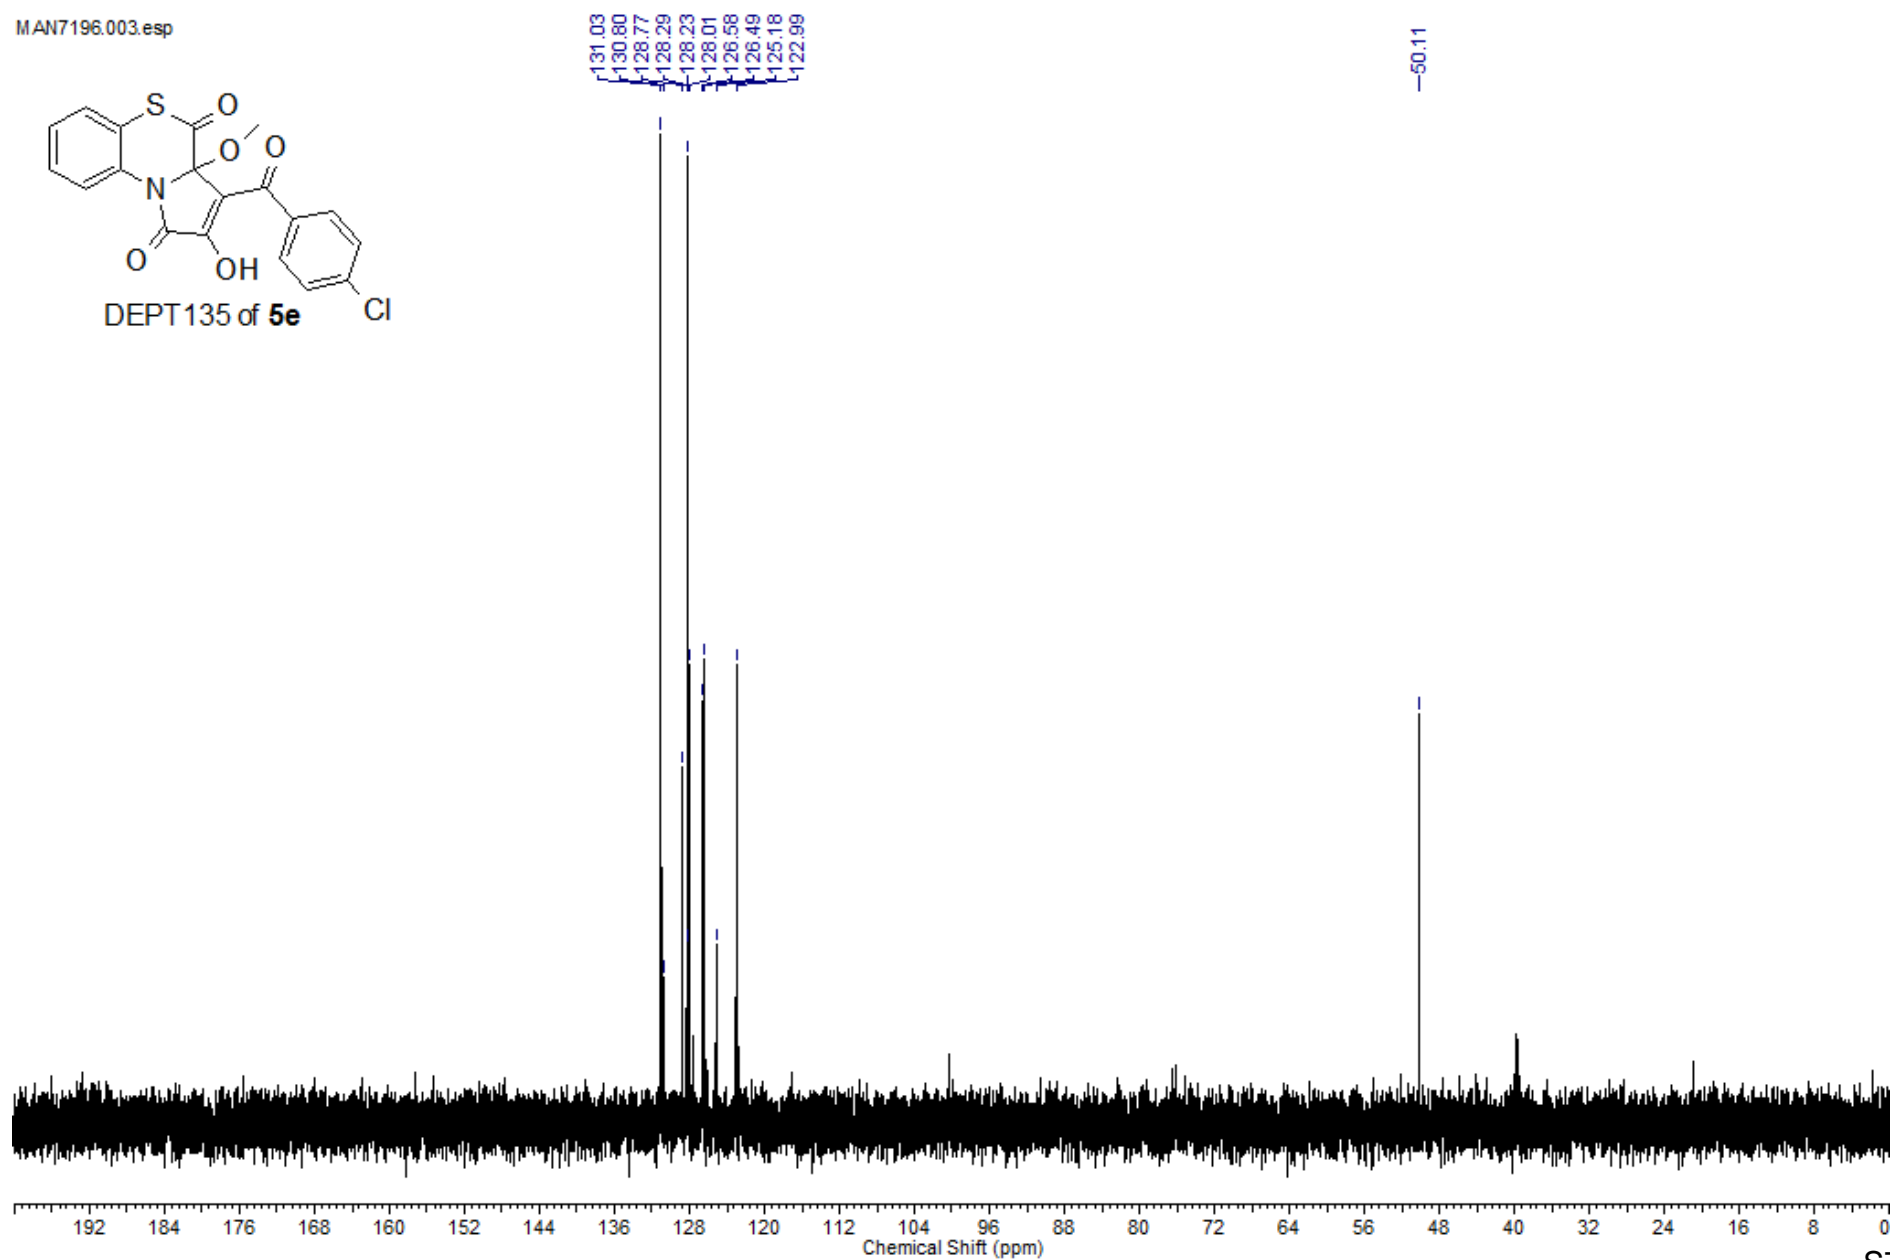

### **3-Aroyl-2,3a-dihydroxy-1H-pyrrolo[2,1-c][1,4]benzothiazine-1,4(3aH)-diones 6. General procedure.**

A mixture of APBTT **1** (0.45 mmol) and water (8.8  $\mu$ L, 0.49 mmol) in anhydrous toluene (3 mL) is stirred in a closed microreaction V-vial at 113 °C for 2 h. Then, the resulting solution is cooled to room temperature. Then, the formed precipitate of compound **6** is filtered off, and washed with toluene. Compounds **6** should not be dried in an oven or under vacuum, since they readily eliminate water.

#### **3-Benzoyl-2,3a-dihydroxy-1H-pyrrolo[2,1-c][1,4]benzothiazine-1,4(3aH)-dione (6a)**

Beige solid; yield (127 mg, 80%); mp 148–150°C (toluene).

$^1\text{H}$  NMR (400 MHz, DMSO- $d_6$ ):  $\delta$  = 7.98 (m, 1H), 7.82 (m, 2H), 7.62 (m, 1H), 7.55–7.46 (m, 4H), 7.36 (m, 1H) ppm.

$^{13}\text{C}$  NMR (100 MHz, DMSO- $d_6$ ):  $\delta$  = 189.8, 189.5, 162.6, 151.0, 137.9, 132.6, 129.1 (2C), 129.0, 128.1 (2C), 127.6, 126.3, 126.1, 122.8, 122.6, 113.2, 86.6 ppm.

IR (mineral oil): 3233, 1727, 1666  $\text{cm}^{-1}$ .

EA: Found: C, 61.51; H, 3.31; N, 4.22. Calc. for  $\text{C}_{18}\text{H}_{11}\text{NO}_5\text{S}$ : C, 61.19; H, 3.14; N, 3.96.

#### **2,3a-Dihydroxy-3-(4-methylbenzoyl)-1H-pyrrolo[2,1-c][1,4]benzothiazine-1,4(3aH)-dione (6b)**

Beige solid; yield (136 mg, 82%); mp 147–149°C (toluene).

$^1\text{H}$  NMR (400 MHz, DMSO- $d_6$ ):  $\delta$  = 7.97 (m, 1H), 7.72 (m, 2H), 7.53–7.45 (m, 2H), 7.37–7.24 (m, 3H), 2.40 (s, 3H) ppm.

$^{13}\text{C}$  NMR (100 MHz, DMSO- $d_6$ ):  $\delta$  = 189.5, 189.5, 162.7, 150.5, 143.0, 135.3, 129.2 (2C), 128.7, 128.7 (2C), 127.6, 126.3, 126.1, 122.8, 122.6, 113.4, 86.6, 21.0 ppm.

IR (mineral oil): 3382, 3085, 1727, 1702, 1661  $\text{cm}^{-1}$ .

EA: Found: C, 62.35; H, 3.73; N, 3.94. Calc. for  $\text{C}_{19}\text{H}_{13}\text{NO}_5\text{S}$ : C, 62.12; H, 3.57; N, 3.81.

#### **3-(4-Chlorobenzoyl)-2,3a-dihydroxy-1H-pyrrolo[2,1-c][1,4]benzothiazine-1,4(3aH)-dione (6e)**

Beige solid; yield (152 mg, 87%); mp 161–163°C (toluene).

$^1\text{H}$  NMR (400 MHz, DMSO- $d_6$ ):  $\delta$  = 7.97 (m, 1H), 7.82 (m, 2H), 7.56 (m, 2H), 7.53 (m, 1H), 7.48 (m, 1H), 7.35 (m, 1H) ppm.

$^{13}\text{C}$  NMR (100 MHz, DMSO- $d_6$ ):  $\delta$  = 189.5, 188.6, 162.5, 151.5, 137.4, 136.7, 130.8 (2C), 128.7, 128.3 (2C), 127.6, 126.3, 126.2, 122.8, 122.6, 112.7, 86.5 ppm.

IR (mineral oil): 3188, 3061, 1759, 1708  $\text{cm}^{-1}$ .

EA: Found: C, 55.93; H, 2.74; N, 3.86. Calc. for  $\text{C}_{18}\text{H}_{10}\text{ClNO}_5\text{S}$ : C, 55.75; H, 2.60; N, 3.61.

MAN7220.001.esp

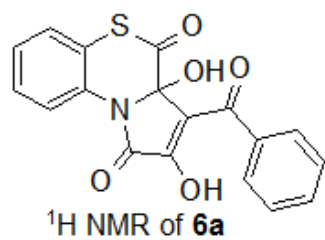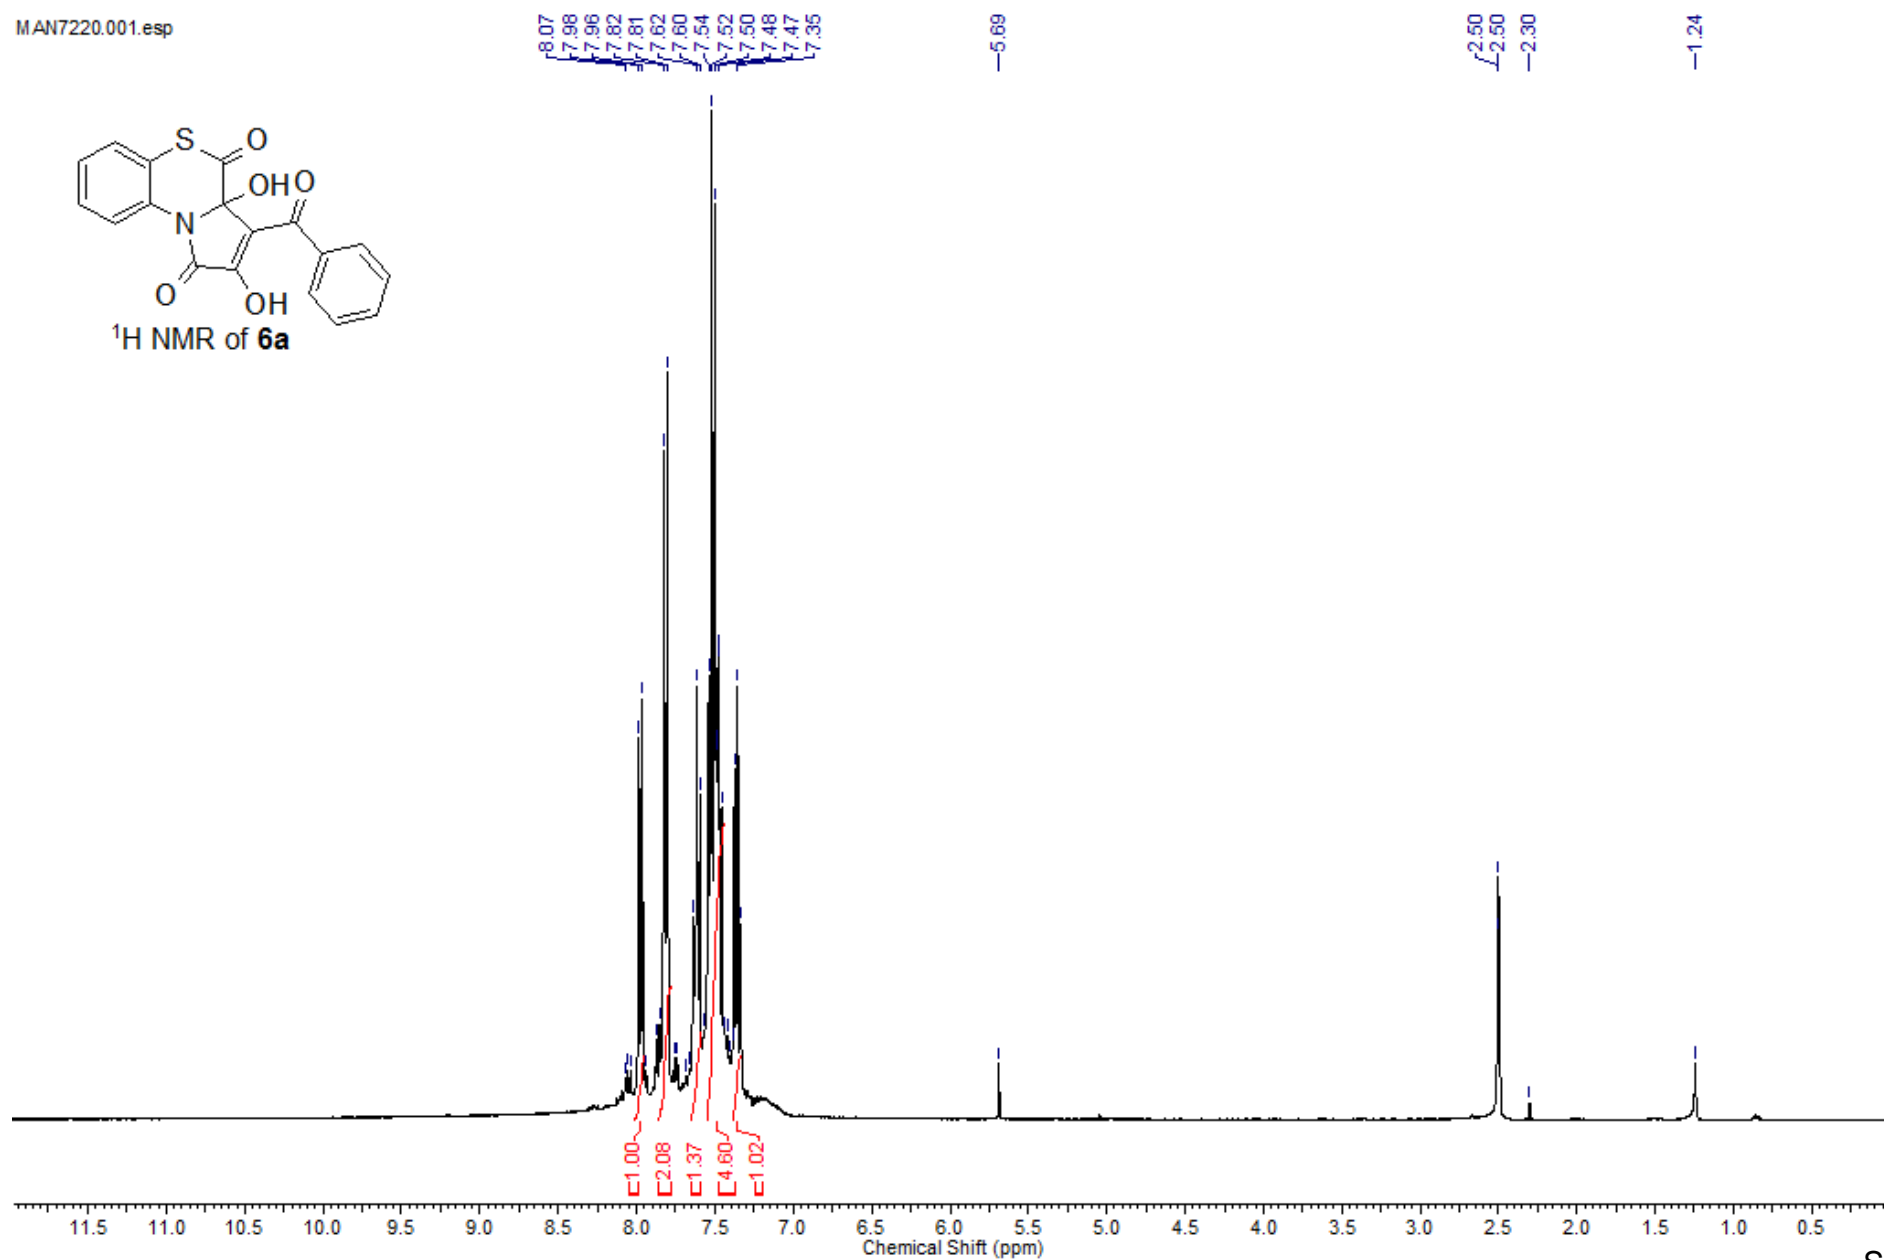

MAN7220.002

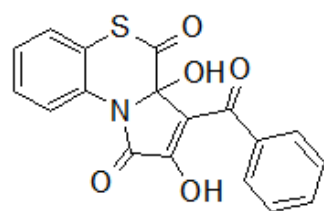

<sup>13</sup>C NMR of 6a

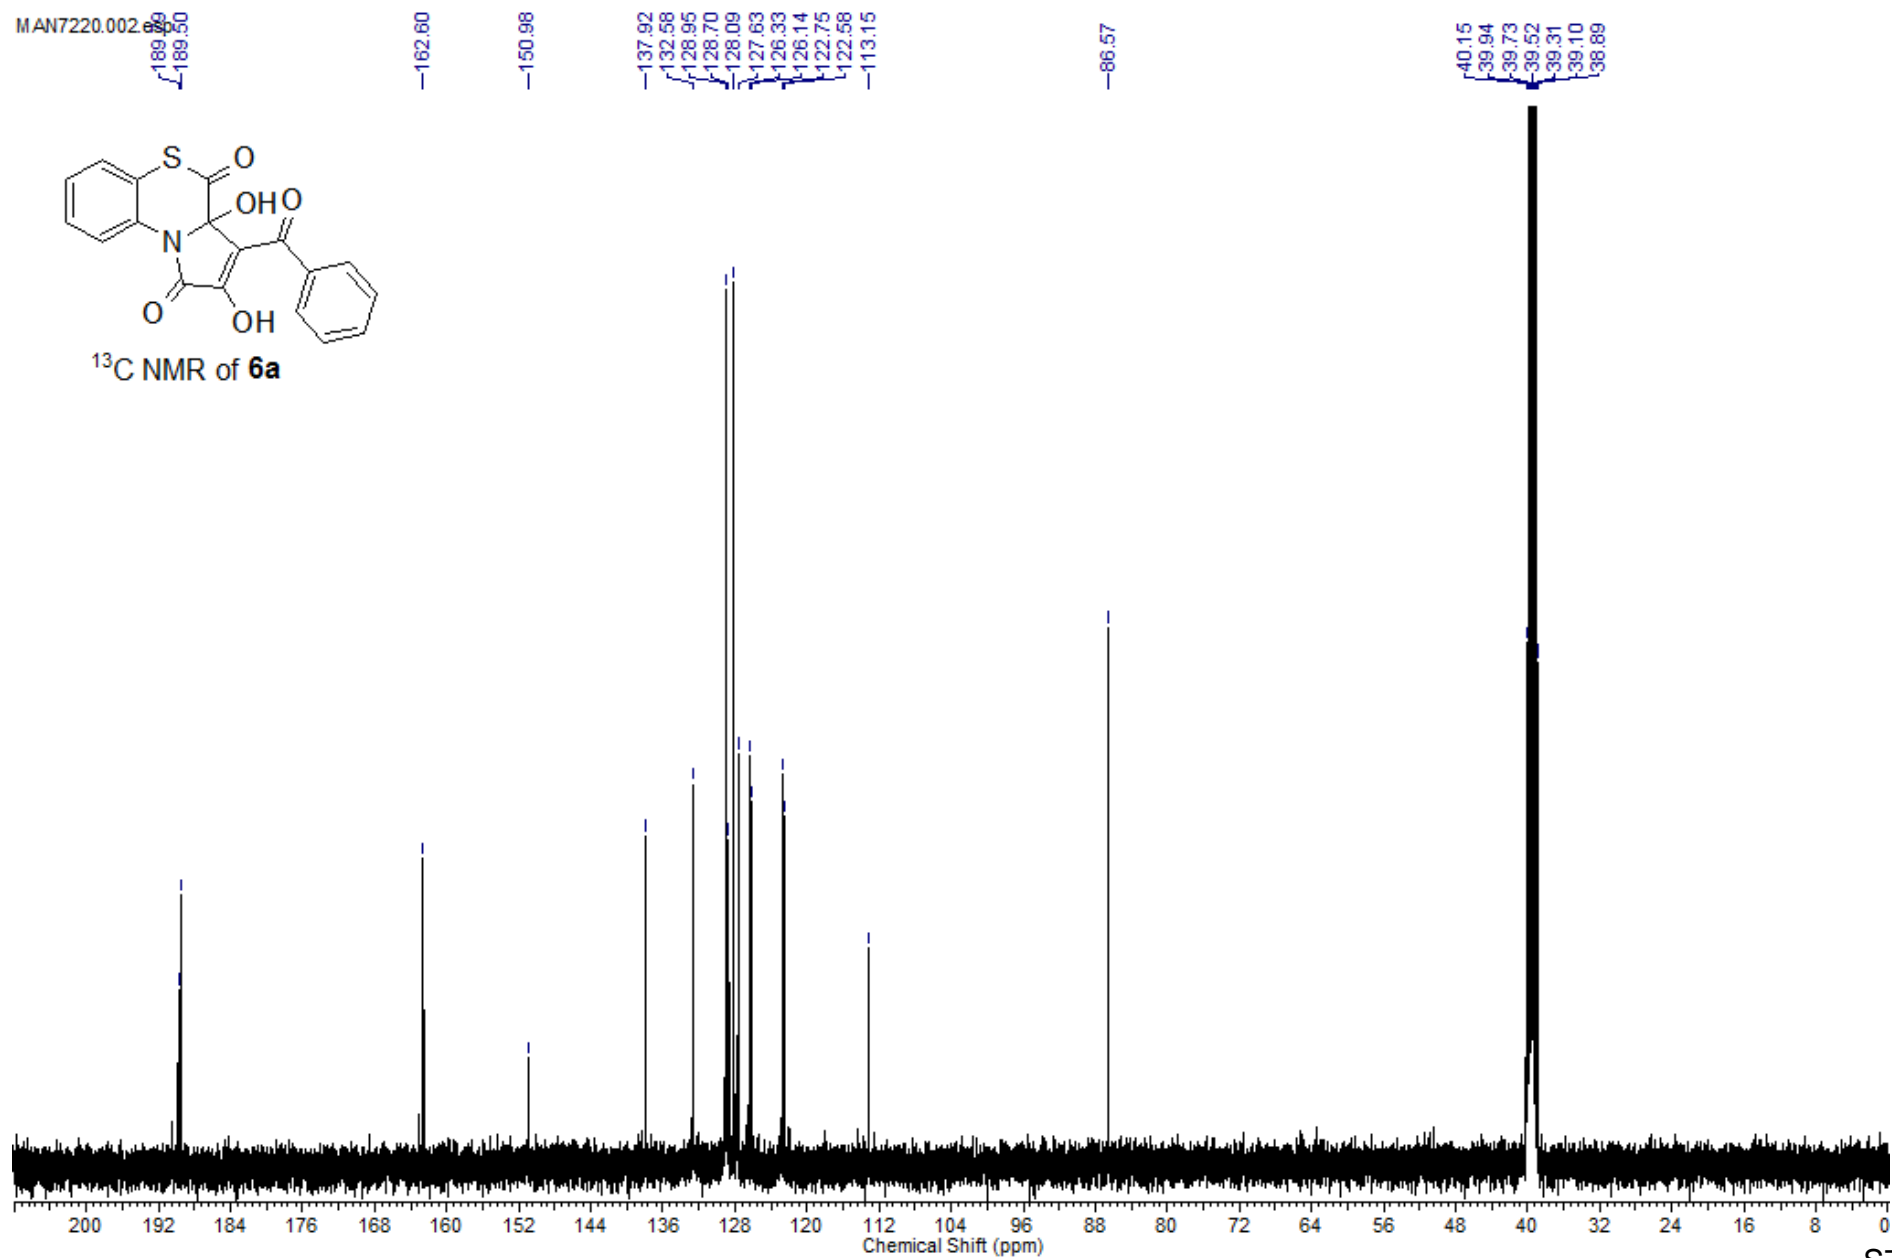



MAN7222.001.esp

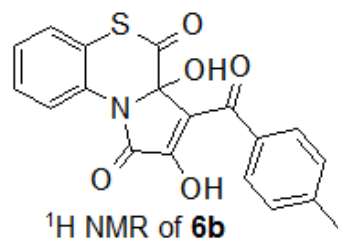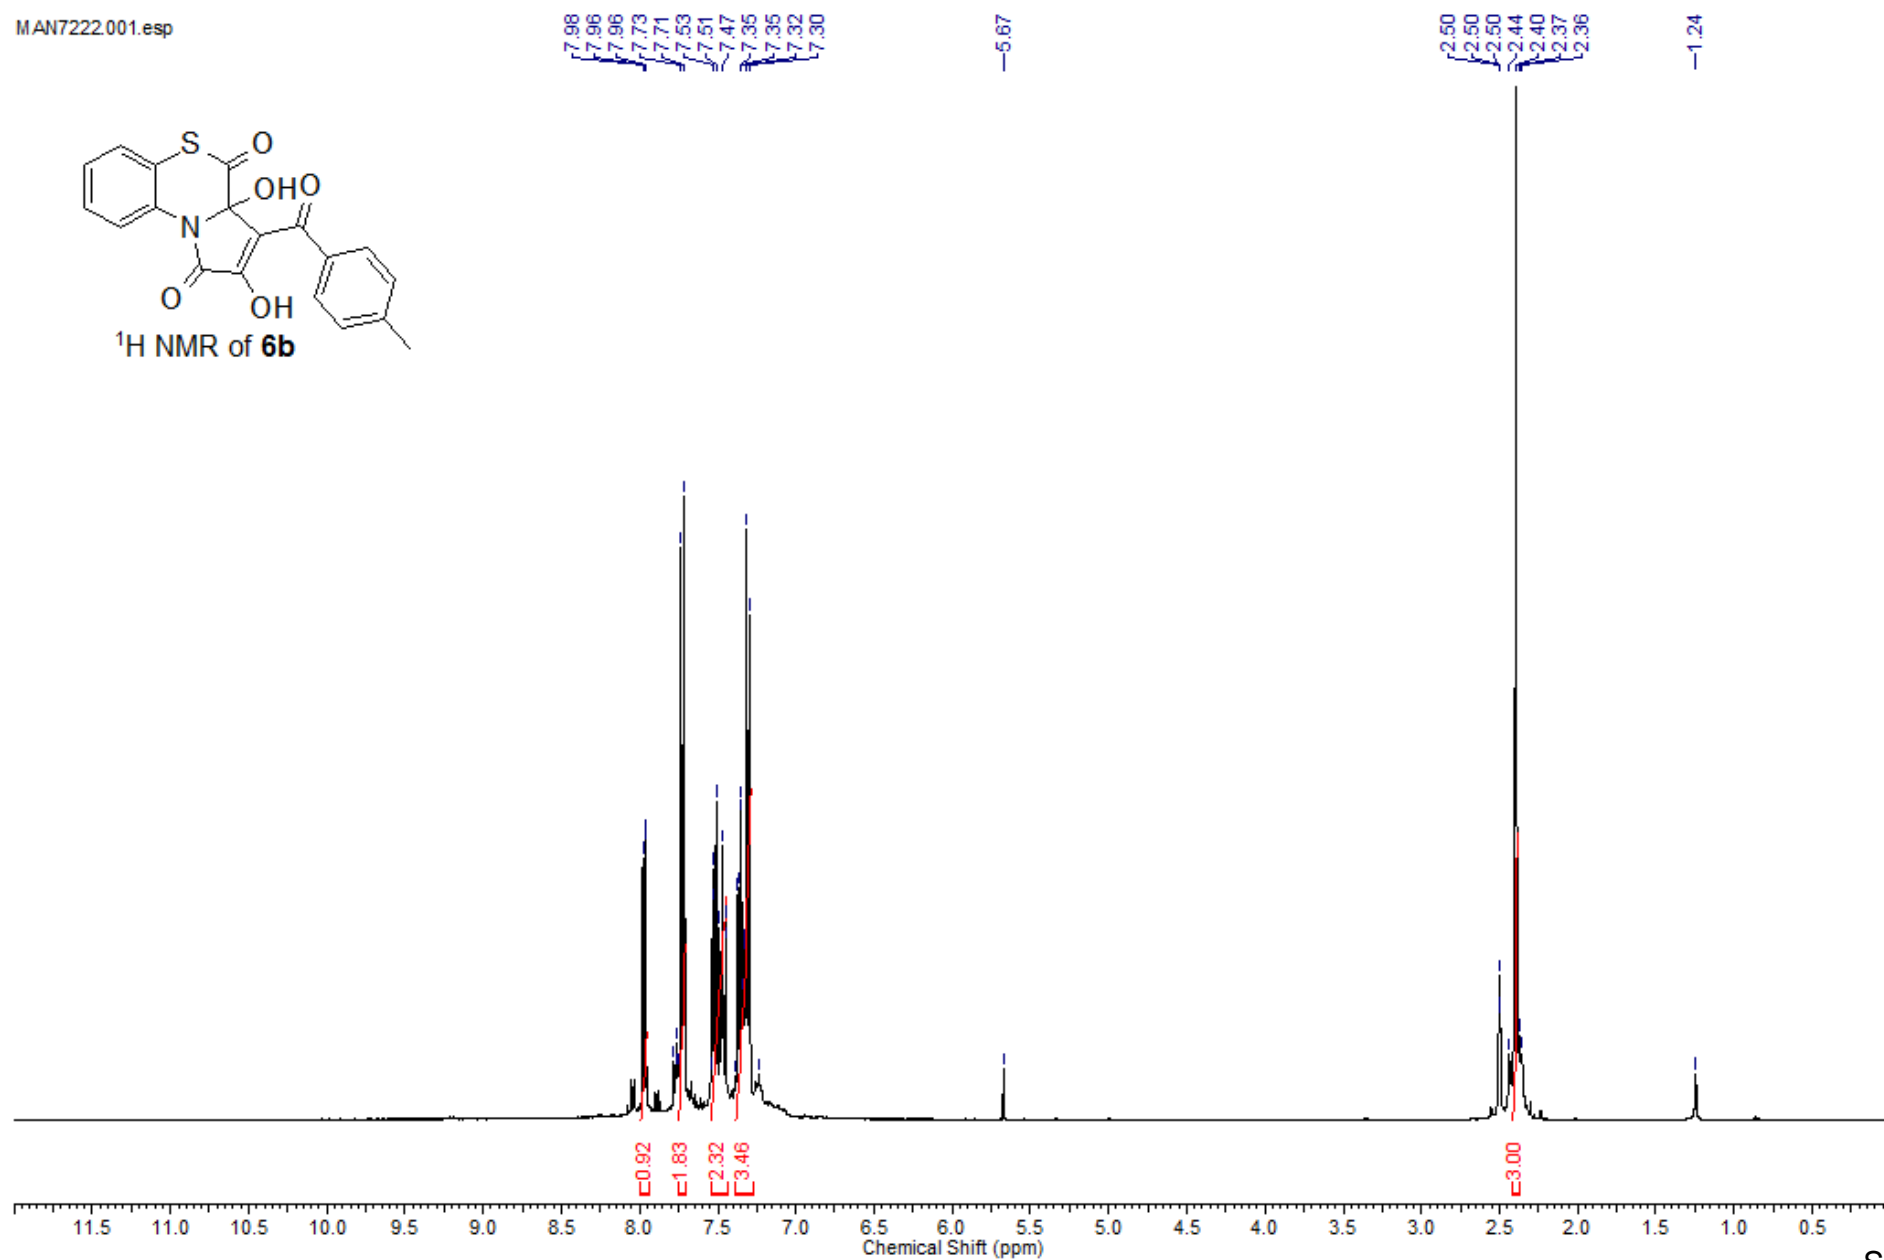

MAN7222.002.esp

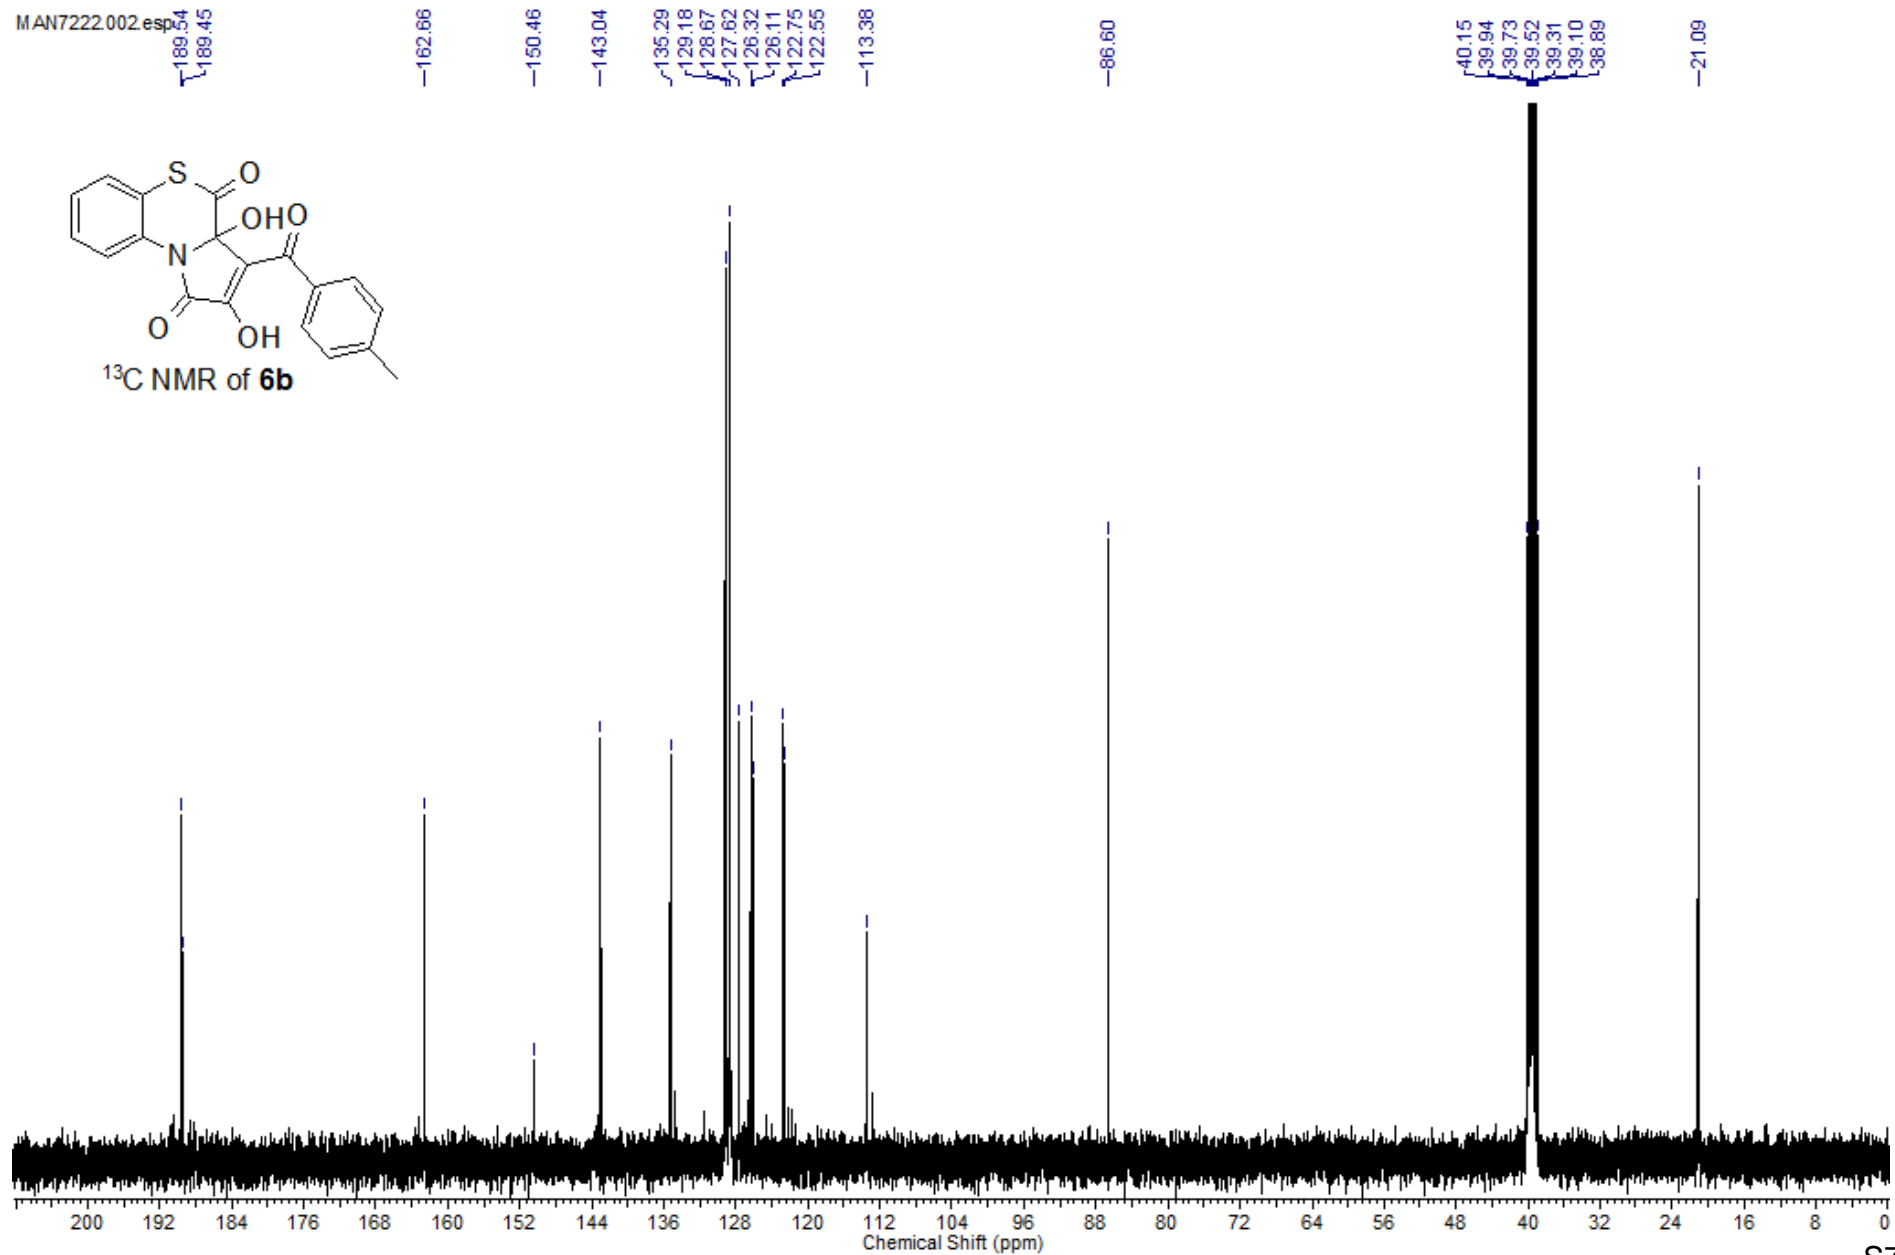

MAN7222.003.esp

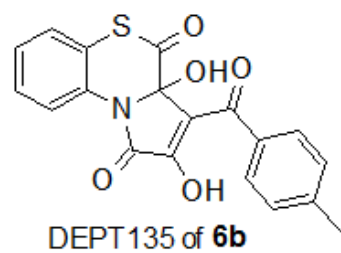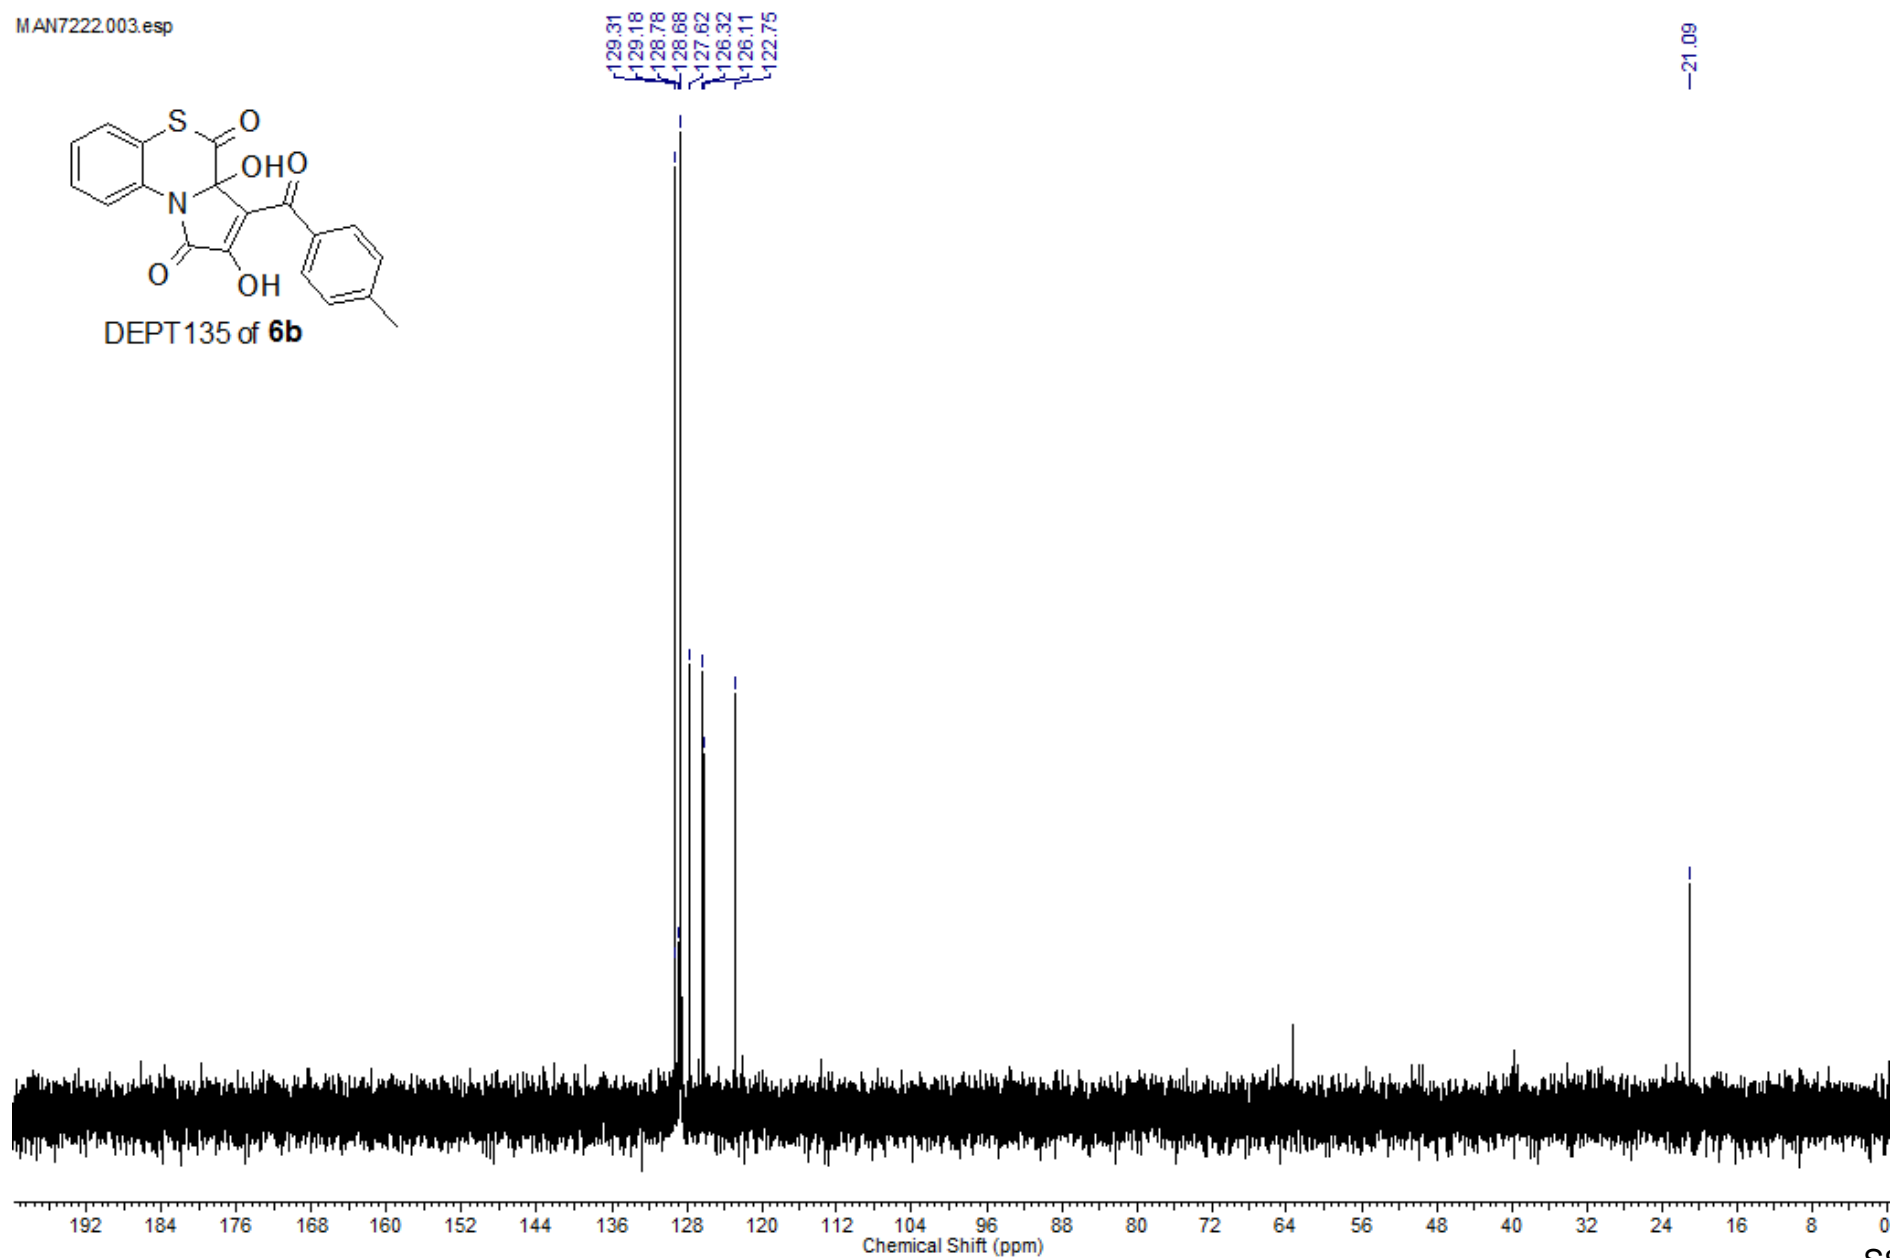



MAN7221.001.esp

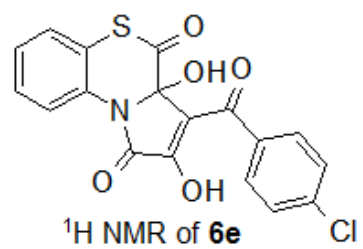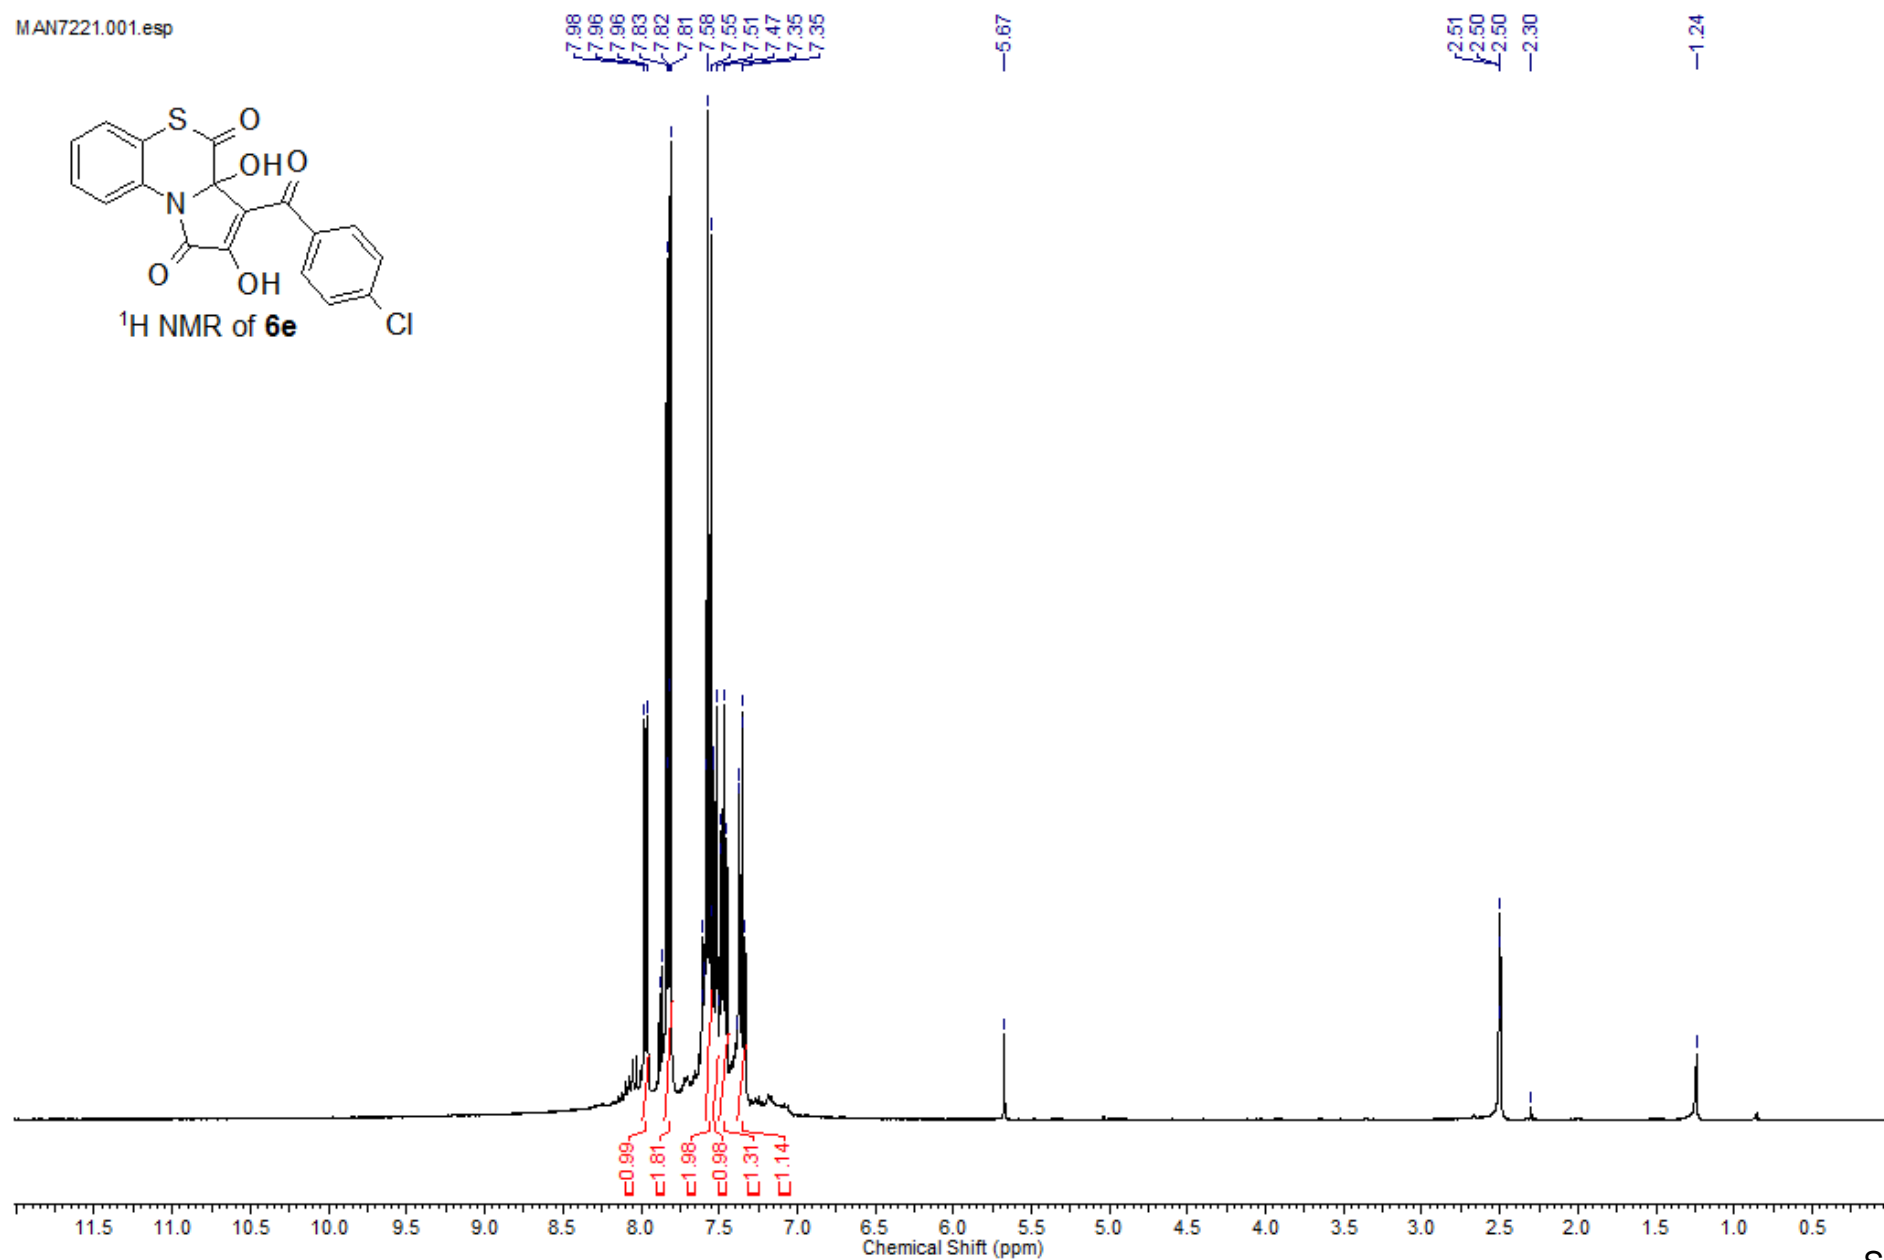

MAN7221.002.esp

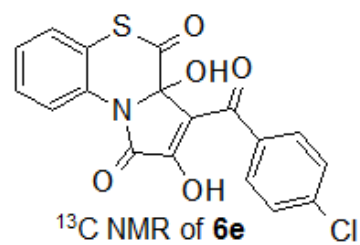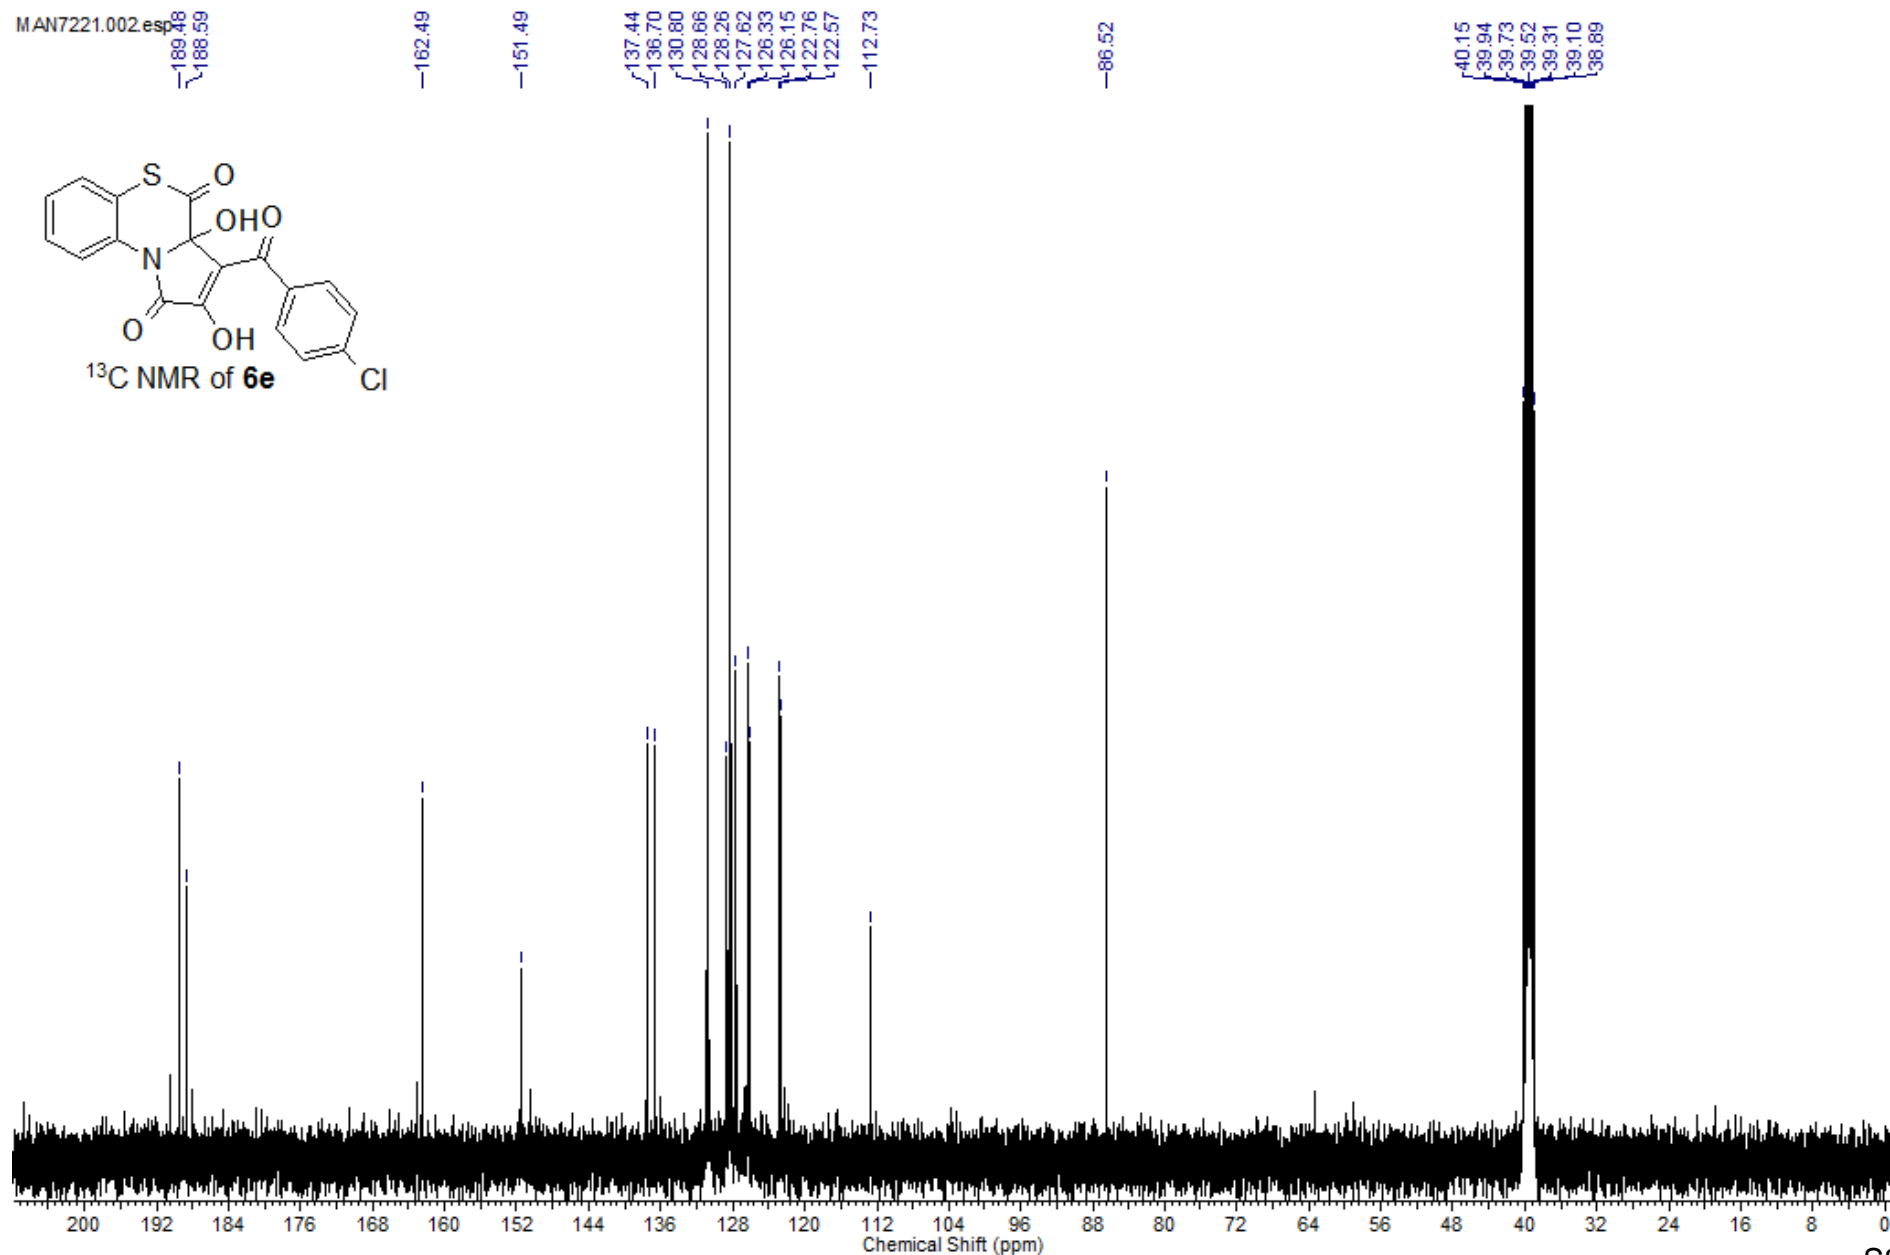

MAN7221.003.esp

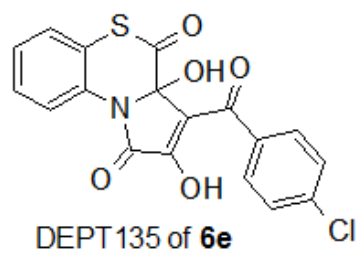

130.94  
130.80  
128.39  
128.26  
127.62  
126.33  
126.15  
122.77

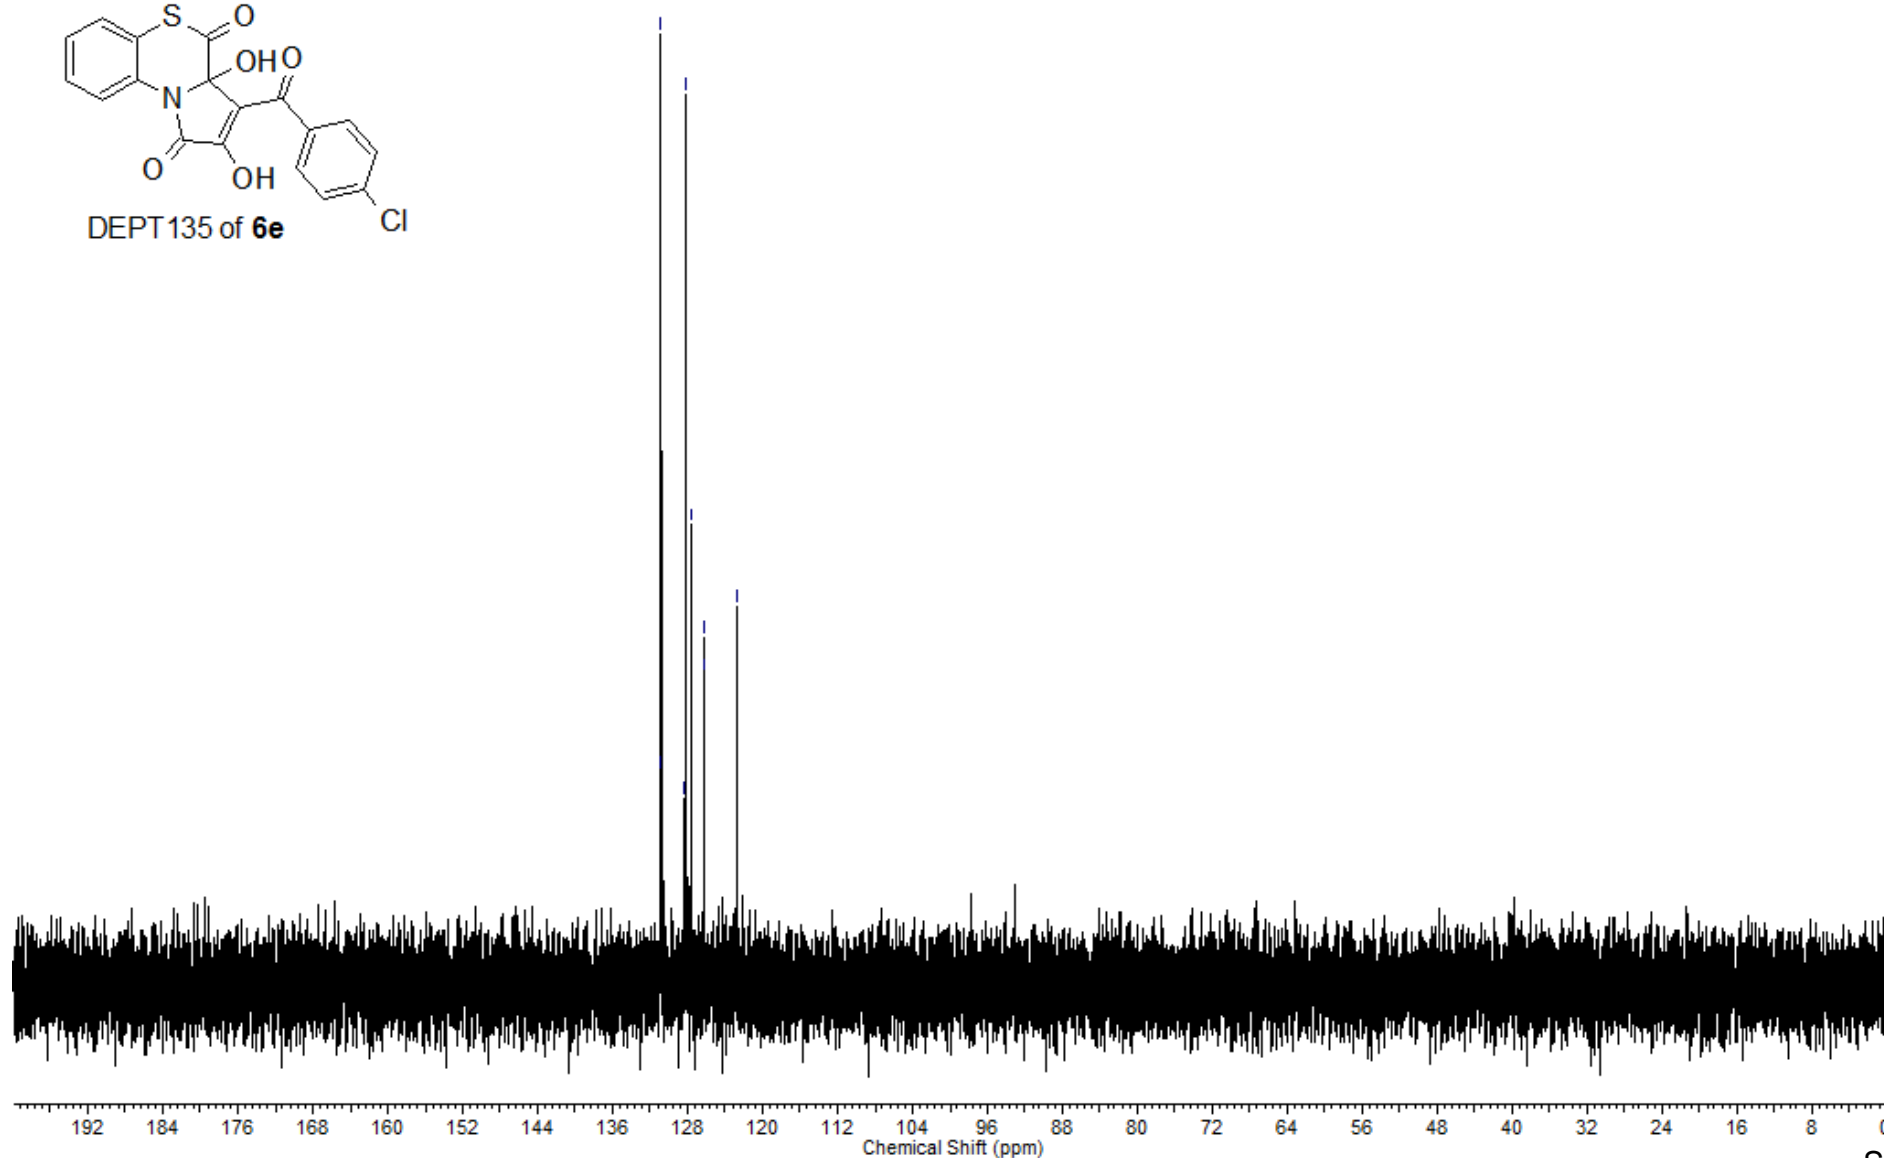

### 3-Aroyl-*N*-benzyl-2-hydroxy-1-oxopyrrolo[2,1-*b*][1,3]benzothiazole-3a(1*H*)-carboxamides 7. General procedure.

A mixture of APBTT **1** (0.45 mmol), benzylamine (0.49 mmol, 54  $\mu$ L), and anhydrous toluene (3 mL) is stirred in a closed microreaction V-vial at 113 °C for 3 h. Then, the resulting solution is cooled to room temperature. After 24 h, the formed precipitate of compound **7** is filtered off and recrystallized from toluene.

#### 3-Benzoyl-*N*-benzyl-2-hydroxy-1-oxopyrrolo[2,1-*b*][1,3]benzothiazole-3a(1*H*)-carboxamide (**7a**)

Yellow solid; yield (88 mg, 44%); mp 203–205 °C (toluene).

$^1\text{H}$  NMR (400 MHz, DMSO- $d_6$ ):  $\delta$  = 8.90 (m, 1H), 8.31 (br.s, 1H), 7.77 (m, 2H), 7.63 (m, 1H), 7.50 (m, 3H), 7.40 (m, 1H), 7.26–7.18 (m, 2H), 7.11 (m, 3H), 7.00 (m, 2H), 4.23 (m, 2H) ppm.

$^{13}\text{C}$  NMR (100 MHz, DMSO- $d_6$ ):  $\delta$  = 187.9, 166.8, 166.4, 154.0, 138.7, 137.3, 134.5, 133.8, 132.6, 128.8 (2C), 128.0 (2C), 127.9 (2C), 126.5, 126.5, 126.5, 126.4 (2C), 125.5, 123.0, 118.0, 80.5, 42.9 ppm.

IR (mineral oil): 3338, 3085, 1789, 1742, 1644  $\text{cm}^{-1}$ .

EA: Found: C, 68.03; H, 4.15; N, 6.31. Calc. for  $\text{C}_{25}\text{H}_{18}\text{N}_2\text{O}_4\text{S}$ : C, 67.86; H, 4.10; N, 6.33.

#### *N*-Benzyl-2-hydroxy-3-(4-methylbenzoyl)-1-oxopyrrolo[2,1-*b*][1,3]benzothiazole-3a(1*H*)-carboxamide (**7b**)

Yellow solid; yield (144 mg, 70%); mp 199–201 °C (toluene).

$^1\text{H}$  NMR (400 MHz, DMSO- $d_6$ ):  $\delta$  = 8.88 (m, 1H), 7.70 (m, 2H), 7.50 (m, 1H), 7.39 (m, 1H), 7.32 (m, 2H), 7.25–7.18 (m, 2H), 7.10 (m, 3H), 6.99 (m, 2H), 4.22 (m, 2H), 2.41 (s, 3H) ppm.

$^{13}\text{C}$  NMR (100 MHz, DMSO- $d_6$ ):  $\delta$  = 187.7, 166.6, 166.4, 152.4, 143.4, 138.7, 134.7, 134.5, 133.7, 129.0 (2C), 128.7 (2C), 127.9 (2C), 126.6, 126.5, 126.4 (2C), 125.5, 123.0, 119.1, 118.1, 80.6, 42.9, 21.1 ppm.

IR (mineral oil): 3307, 3090, 1779, 1741, 1662  $\text{cm}^{-1}$ .

EA: Found: C, 68.51; H, 4.48; N, 6.21. Calc. for  $\text{C}_{26}\text{H}_{20}\text{N}_2\text{O}_4\text{S}$ : C, 68.41; H, 4.42; N, 6.14.

#### *N*-Benzyl-2-hydroxy-3-(4-methoxybenzoyl)-1-oxopyrrolo[2,1-*b*][1,3]benzothiazole-3a(1*H*)-carboxamide (**7c**)

Yellow solid; yield (83 mg, 39%); mp 202–204 °C (toluene).

$^1\text{H}$  NMR (400 MHz, DMSO- $d_6$ ):  $\delta$  = 8.86 (s, 1H), 7.81 (m, 2H), 7.50 (m, 1H), 7.39 (m, 1H), 7.22 (m, 2H), 7.05 (m, 8H), 4.21 (m, 2H), 3.87 (s, 3H) ppm.

$^{13}\text{C}$  NMR (100 MHz, DMSO- $d_6$ ):  $\delta$  = 186.6, 166.6 (2C), 163.3, 151.2, 138.7, 135.0, 133.7, 131.5 (2C), 129.6, 127.9 (2C), 126.5, 126.5, 126.4 (2C), 125.5, 123.0, 119.4, 118.1, 113.5 (2C), 80.7, 55.5, 42.8 ppm.

IR (mineral oil): 3327, 3185, 1742, 1693, 1648  $\text{cm}^{-1}$ .

EA: Found: C, 66.31; H, 4.34; N, 6.00. Calc. for  $\text{C}_{26}\text{H}_{20}\text{N}_2\text{O}_5\text{S}$ : C, 66.09; H, 4.27; N, 5.93.

***N*-Benzyl-3-(4-fluorobenzoyl)-2-hydroxy-1-oxopyrrolo[2,1-*b*][1,3]benzothiazole-3a(1*H*)-carboxamide (7d)**

Yellow solid; yield (102 mg, 49%); mp 215–217 °C (toluene).

<sup>1</sup>H NMR (400 MHz, DMSO-*d*<sub>6</sub>): δ = 8.87 (m, 1H), 7.85 (m, 2H), 7.49 (m, 1H), 7.38 (m, 1H), 7.31 (m, 2H), 7.21 (m, 2H), 7.12 (m, 3H), 7.00 (m, 2H), 4.21 (m, 2H) ppm.

<sup>13</sup>C NMR (100 MHz, DMSO-*d*<sub>6</sub>): δ = 186.5, 166.6, 166.3, 166.0, 163.5, 153.8, 138.7, 134.6, 133.8, 133.8, 133.7, 131.8, 131.7, 127.9 (2C), 126.6, 126.5, 126.4 (2C), 125.5, 123.1, 118.3, 118.0, 115.3, 115.0, 80.6, 42.9 ppm.

IR (mineral oil): 3326, 3172, 1741, 1658, 1647 cm<sup>-1</sup>.

EA: Found: C, 65.44; H, 3.87; N, 6.15. Calc. for C<sub>25</sub>H<sub>17</sub>FN<sub>2</sub>O<sub>4</sub>S: C, 65.21; H, 3.72; N, 6.08.

***N*-Benzyl-3-(4-chlorobenzoyl)-2-hydroxy-1-oxopyrrolo[2,1-*b*][1,3]benzothiazole-3a(1*H*)-carboxamide (7e)**

Yellow solid; yield (93 mg, 43%); mp 217–219 °C (toluene).

<sup>1</sup>H NMR (400 MHz, DMSO-*d*<sub>6</sub>): δ = 8.89 (m, 1H), 7.78 (m, 2H), 7.56 (m, 2H), 7.49 (m, 1H), 7.39 (m, 1H), 7.25–7.12 (m, 5H), 7.00 (m, 2H), 4.22 (m, 2H) ppm.

<sup>13</sup>C NMR (100 MHz, DMSO-*d*<sub>6</sub>): δ = 186.6, 166.8, 166.3, 155.0, 138.7, 137.3, 136.1, 134.4, 133.8, 130.6 (2C), 128.2 (2C), 127.9 (2C), 126.5, 126.5, 126.4 (2C), 125.5, 123.1, 117.9, 117.2, 80.5, 42.9 ppm.

IR (mineral oil): 3310, 3088, 1784, 1739, 1659 cm<sup>-1</sup>.

EA: Found: C, 63.14; H, 3.64 N, 5.92. Calc. for C<sub>25</sub>H<sub>17</sub>ClN<sub>2</sub>O<sub>4</sub>S: C, 62.96; H, 3.59; N, 5.87.

***N*-Benzyl-3-(4-bromobenzoyl)-2-hydroxy-1-oxopyrrolo[2,1-*b*][1,3]benzothiazole-3a(1*H*)-carboxamide (7f)**

Yellow solid; yield (153 mg, 65%); mp 210–212 °C (toluene).

<sup>1</sup>H NMR (400 MHz, DMSO-*d*<sub>6</sub>): δ = 8.87 (m, 1H), 7.69 (m, 4H), 7.50 (m, 1H), 7.38 (m, 1H), 7.21 (m, 2H), 7.13 (3H), 7.02 (m, 2H), 6.63 (br.s, 1H), 4.21 (m, 2H) ppm.

<sup>13</sup>C NMR (100 MHz, DMSO-*d*<sub>6</sub>): δ = 186.7, 166.7, 166.2, 155.0, 138.7, 136.4, 134.4, 133.8, 131.1 (2C), 130.7 (2C), 127.9 (2C), 126.5, 126.5, 126.5, 126.4 (2C), 125.5, 123.1, 117.9, 117.7, 80.5, 42.9 ppm.

IR (mineral oil): 3311, 3105, 1751, 1709, 1670 cm<sup>-1</sup>.

EA: Found: C, 57.73; H, 3.42 N, 5.40. Calc. for C<sub>25</sub>H<sub>17</sub>BrN<sub>2</sub>O<sub>4</sub>S: C, 57.59; H, 3.29; N, 5.37.

***N*-Benzyl-3-(furan-2-ylcarbonyl)-2-hydroxy-1-oxopyrrolo[2,1-*b*][1,3]benzothiazole-3a(1*H*)-carboxamide (7g)**

Yellow solid; yield (35 mg, 18%); mp 152–154 °C (toluene).

<sup>1</sup>H NMR (400 MHz, DMSO-*d*<sub>6</sub>): δ = 8.86 (m, 1H), 8.61 (br.s, 1H), 8.04 (m, 1H), 7.79 (m, 1H), 7.49 (m, 1H), 7.38 (m, 1H), 7.20 (m, 2H), 7.13 (m, 3H), 6.99 (m, 2H), 6.76 (m, 1H), 4.21 (m, 2H) ppm.

$^{13}\text{C}$  NMR (100 MHz, DMSO- $d_6$ ):  $\delta$  = 173.0, 166.7, 166.2, 153.5, 151.2, 148.0, 138.7, 134.4, 133.8, 127.9 (2C), 126.5, 126.5, 126.3 (2C), 125.5, 123.0, 120.2, 118.1, 117.8, 112.3, 80.5, 42.9 ppm.

IR (mineral oil): 3318, 3110, 1775, 1720, 1660  $\text{cm}^{-1}$ .

EA: Found: C, 64.11; H, 3.91; N, 6.63. Calc. for  $\text{C}_{23}\text{H}_{16}\text{N}_2\text{O}_5\text{S}$ : C, 63.88; H, 3.73; N, 6.48.

***N*-Benzyl-2-hydroxy-1-oxo-3-(thiophen-2-ylcarbonyl)pyrrolo[2,1-*b*][1,3]benzothiazole-3a(1*H*)-carboxamide (7h)**

Yellow solid; yield (40 mg, 20%); mp 187–186 °C (toluene).

$^1\text{H}$  NMR (400 MHz, DMSO- $d_6$ ):  $\delta$  = 9.30 (br.s, 1H), 8.86 (m, 1H), 8.30 (m, 1H), 8.03 (m, 1H), 7.50 (m, 1H), 7.38 (m, 1H), 7.27 (m, 1H), 7.24–7.17 (m, 2H), 7.11 (m, 3H), 6.98 (m, 2H), 4.21 (m, 2H) ppm.

$^{13}\text{C}$  NMR (100 MHz, DMSO- $d_6$ ):  $\delta$  = 178.6, 166.8, 166.3, 153.5, 143.6, 138.7, 135.2, 134.5, 134.0, 133.8, 128.4, 127.9 (2C), 126.5, 126.4, 126.3 (2C), 125.5, 123.0, 118.2, 117.9, 80.7, 42.9 ppm.

IR (mineral oil): 3333, 3170, 1785, 1743, 1659  $\text{cm}^{-1}$ .

EA: Found: C, 61.72; H, 3.69; N, 6.32. Calc. for  $\text{C}_{23}\text{H}_{16}\text{N}_2\text{O}_4\text{S}_2$ : C, 61.59; H, 3.60; N, 6.25.

MAN7241.005.esp

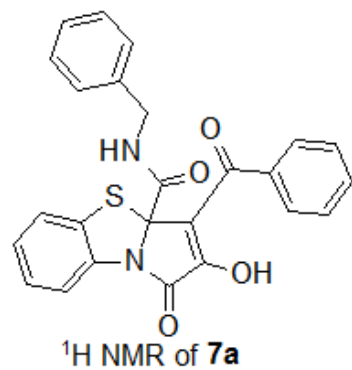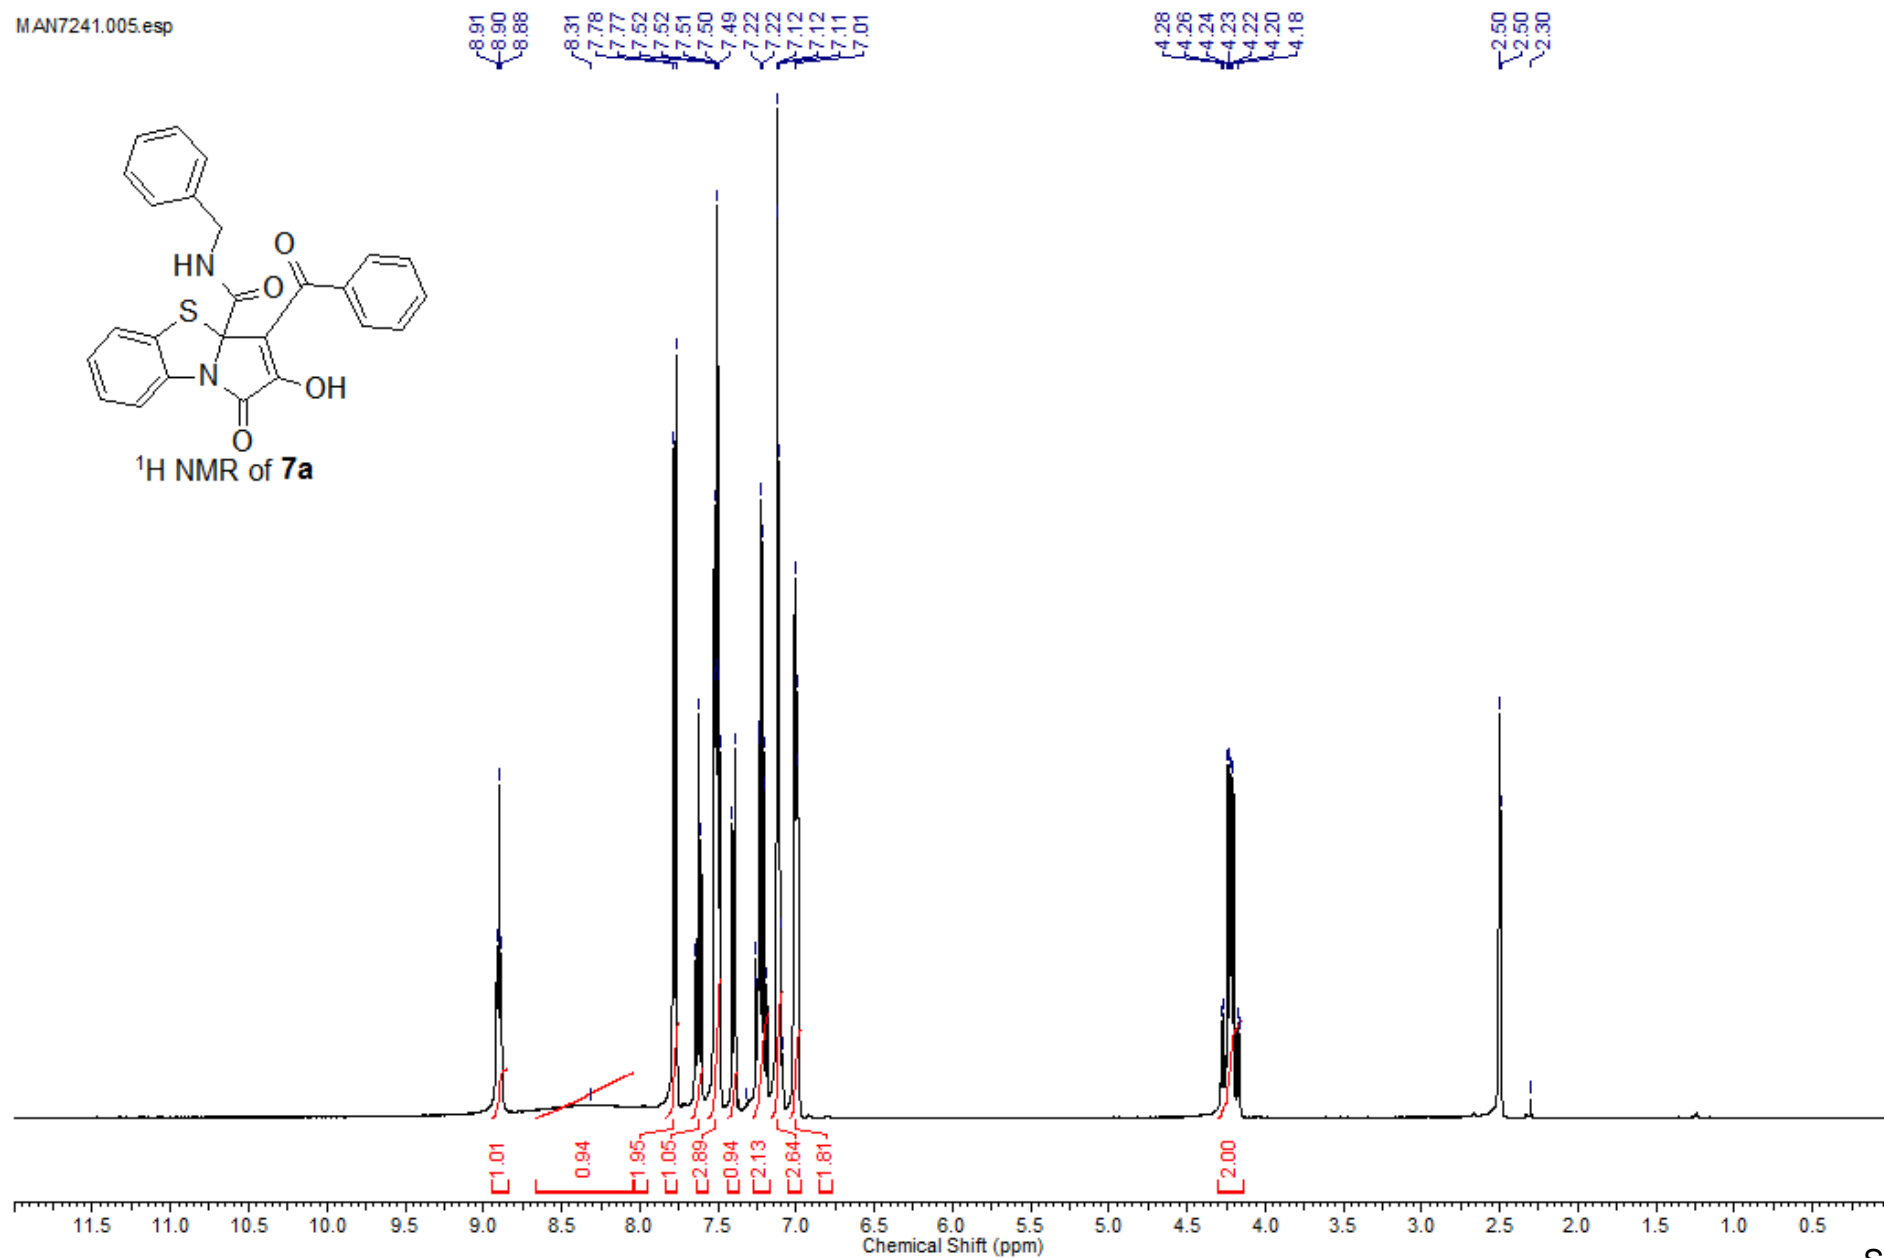

MAN7241.002.esp

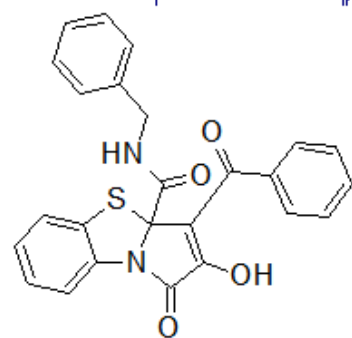

<sup>13</sup>C NMR of 7a

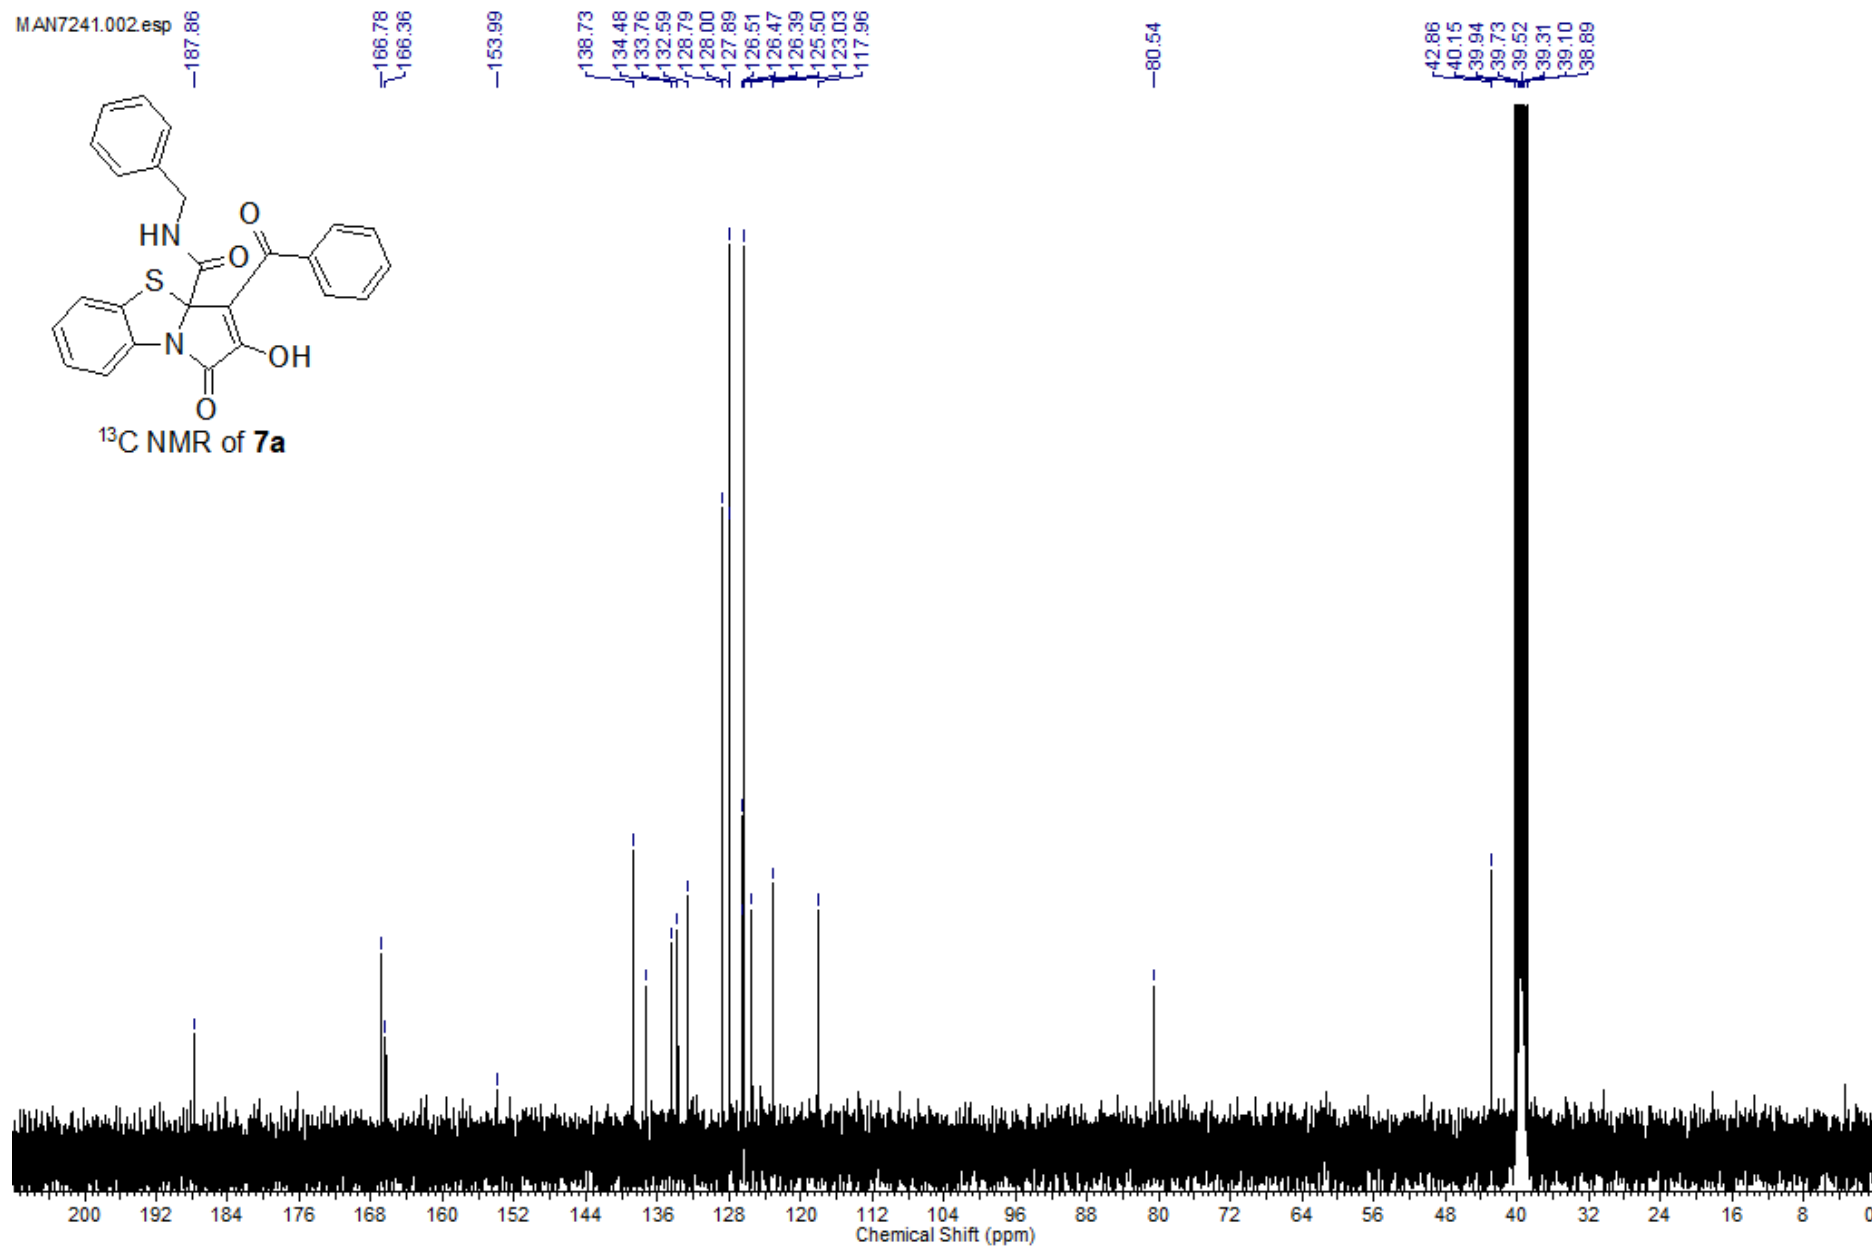



MAN7241.003.esp

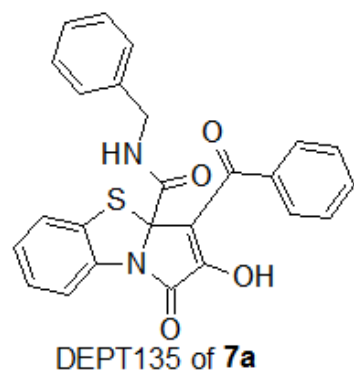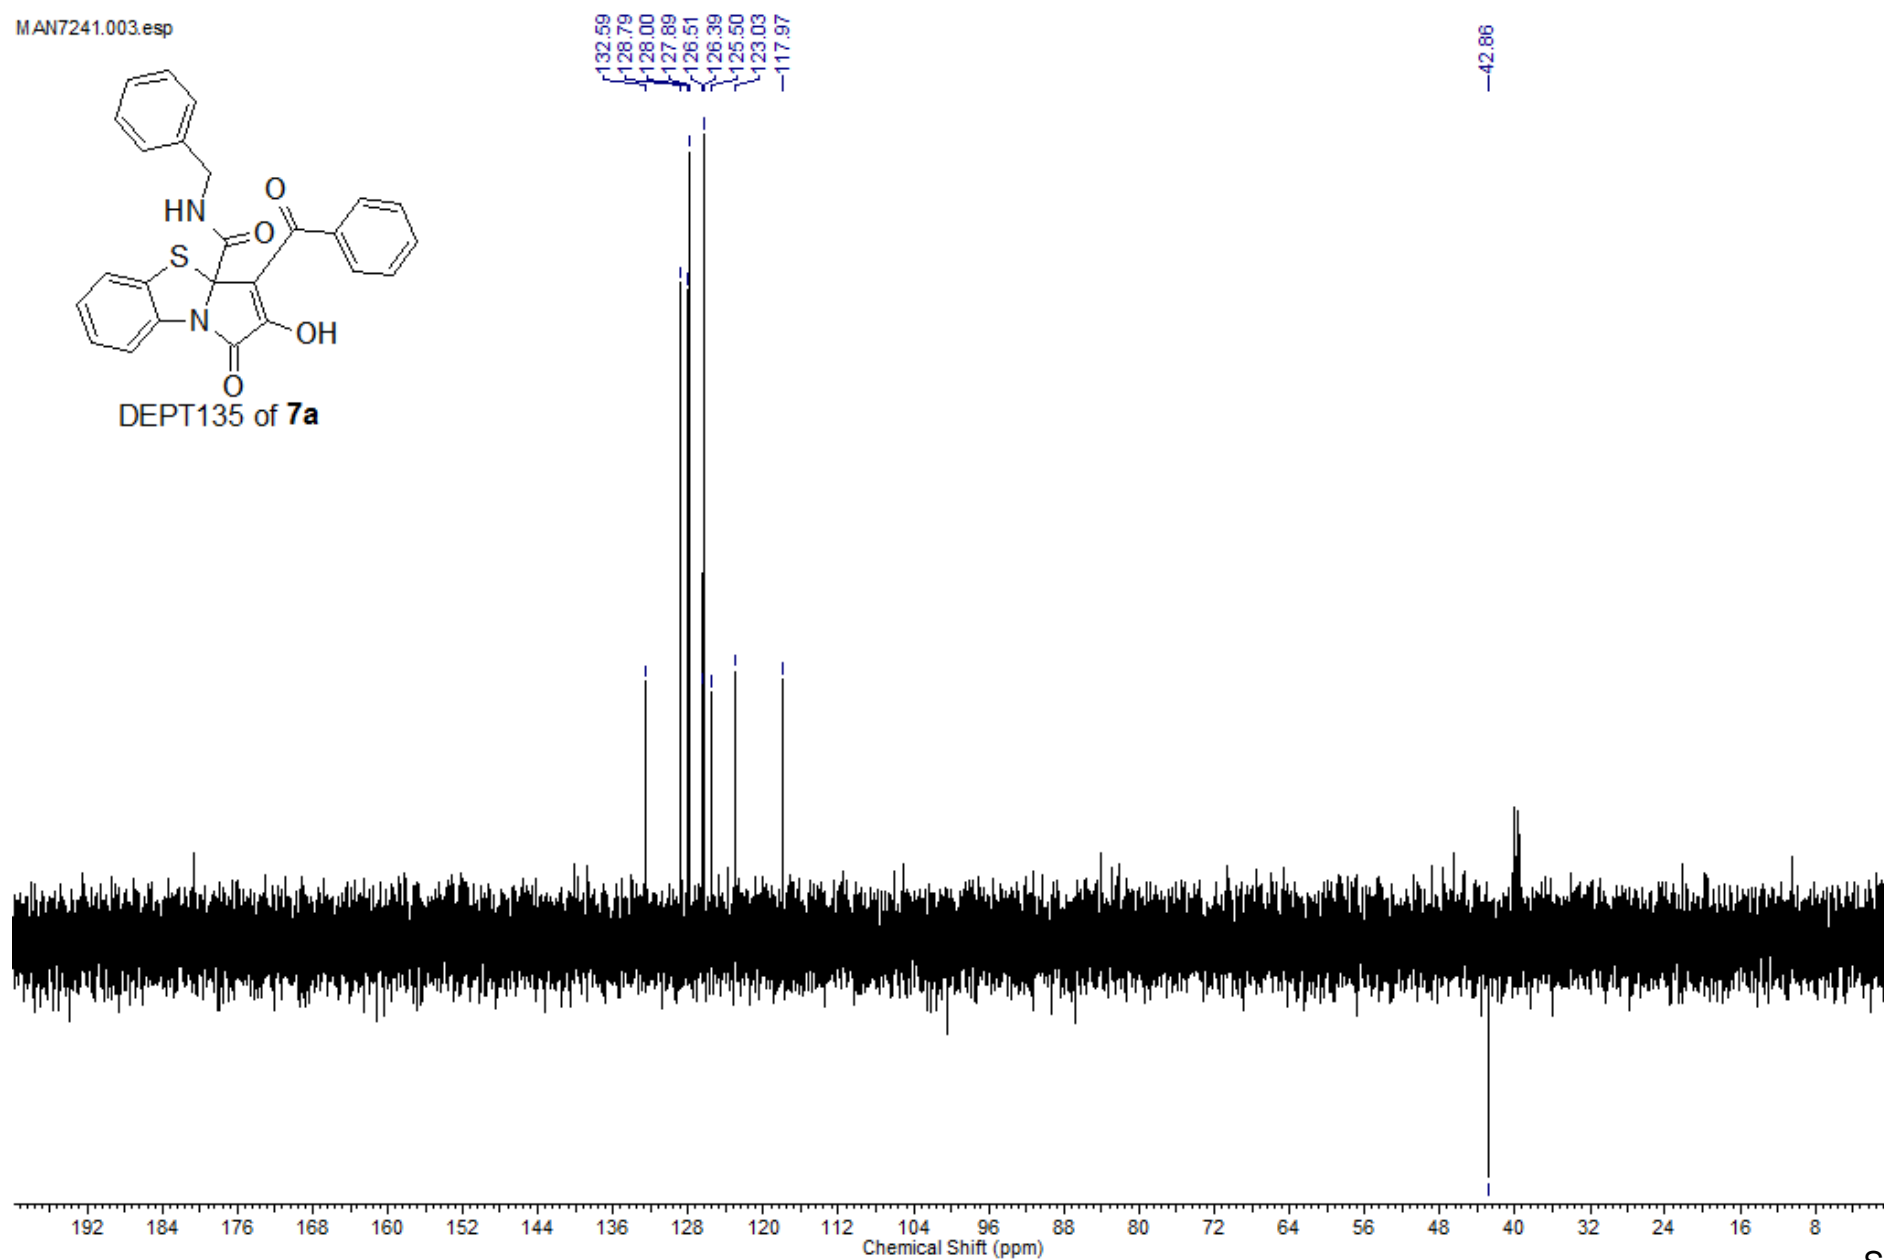

MAN7253.001.esp

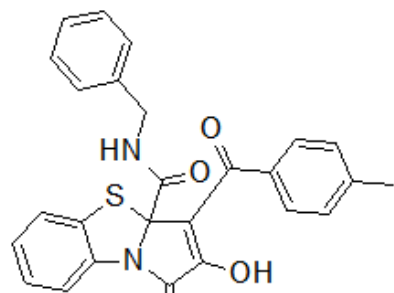

<sup>1</sup>H NMR of 7b

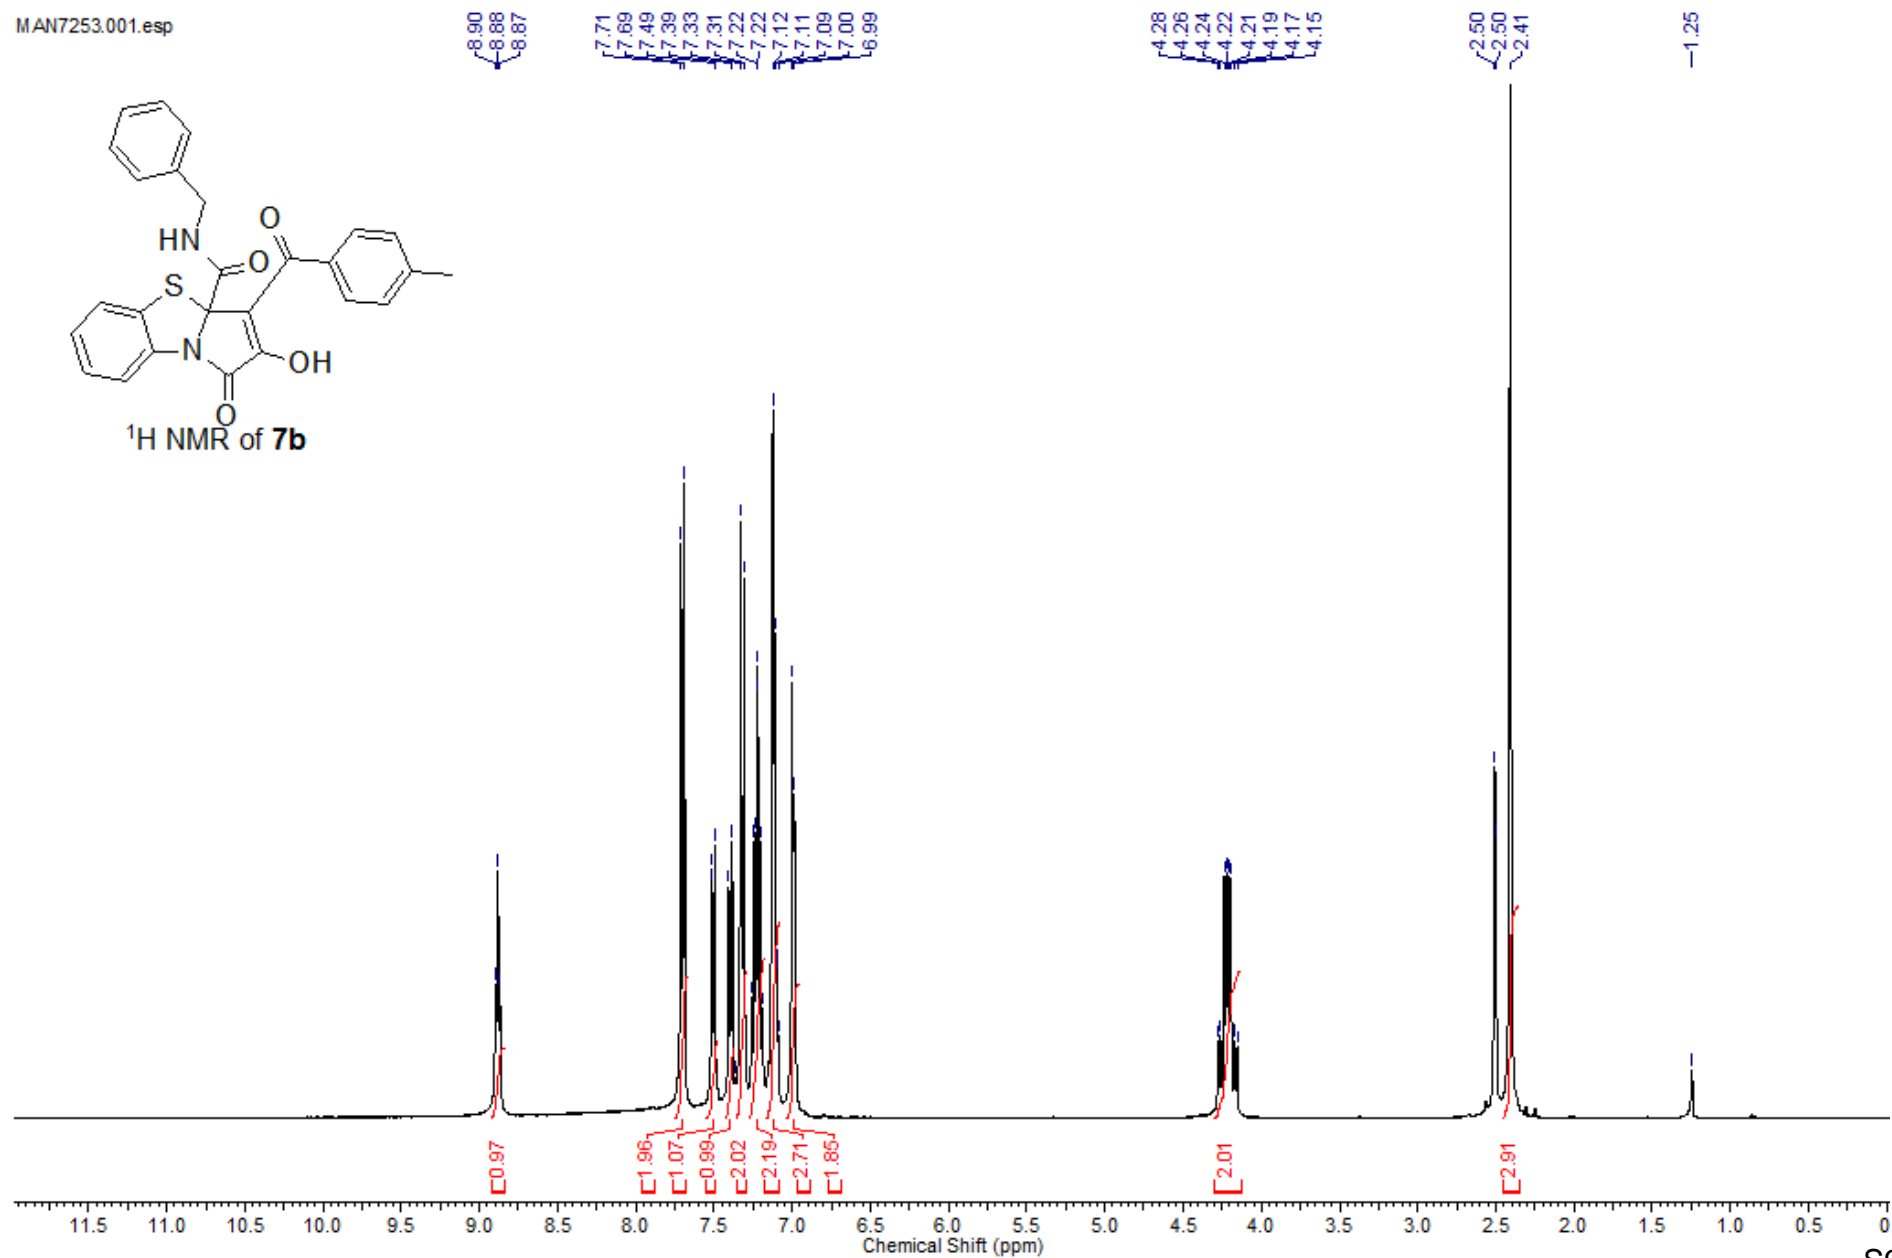

MAN7253.002.esp

187.70

166.56

166.42

152.37

143.35

138.71

134.74

134.46

133.67

129.04

128.67

127.89

126.56

126.48

126.39

125.52

123.03

119.09

118.08

80.63

42.88

40.15

39.94

39.73

39.52

39.31

39.10

38.90

21.12

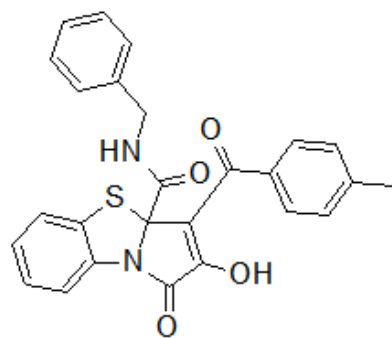

<sup>13</sup>C NMR of **7b**

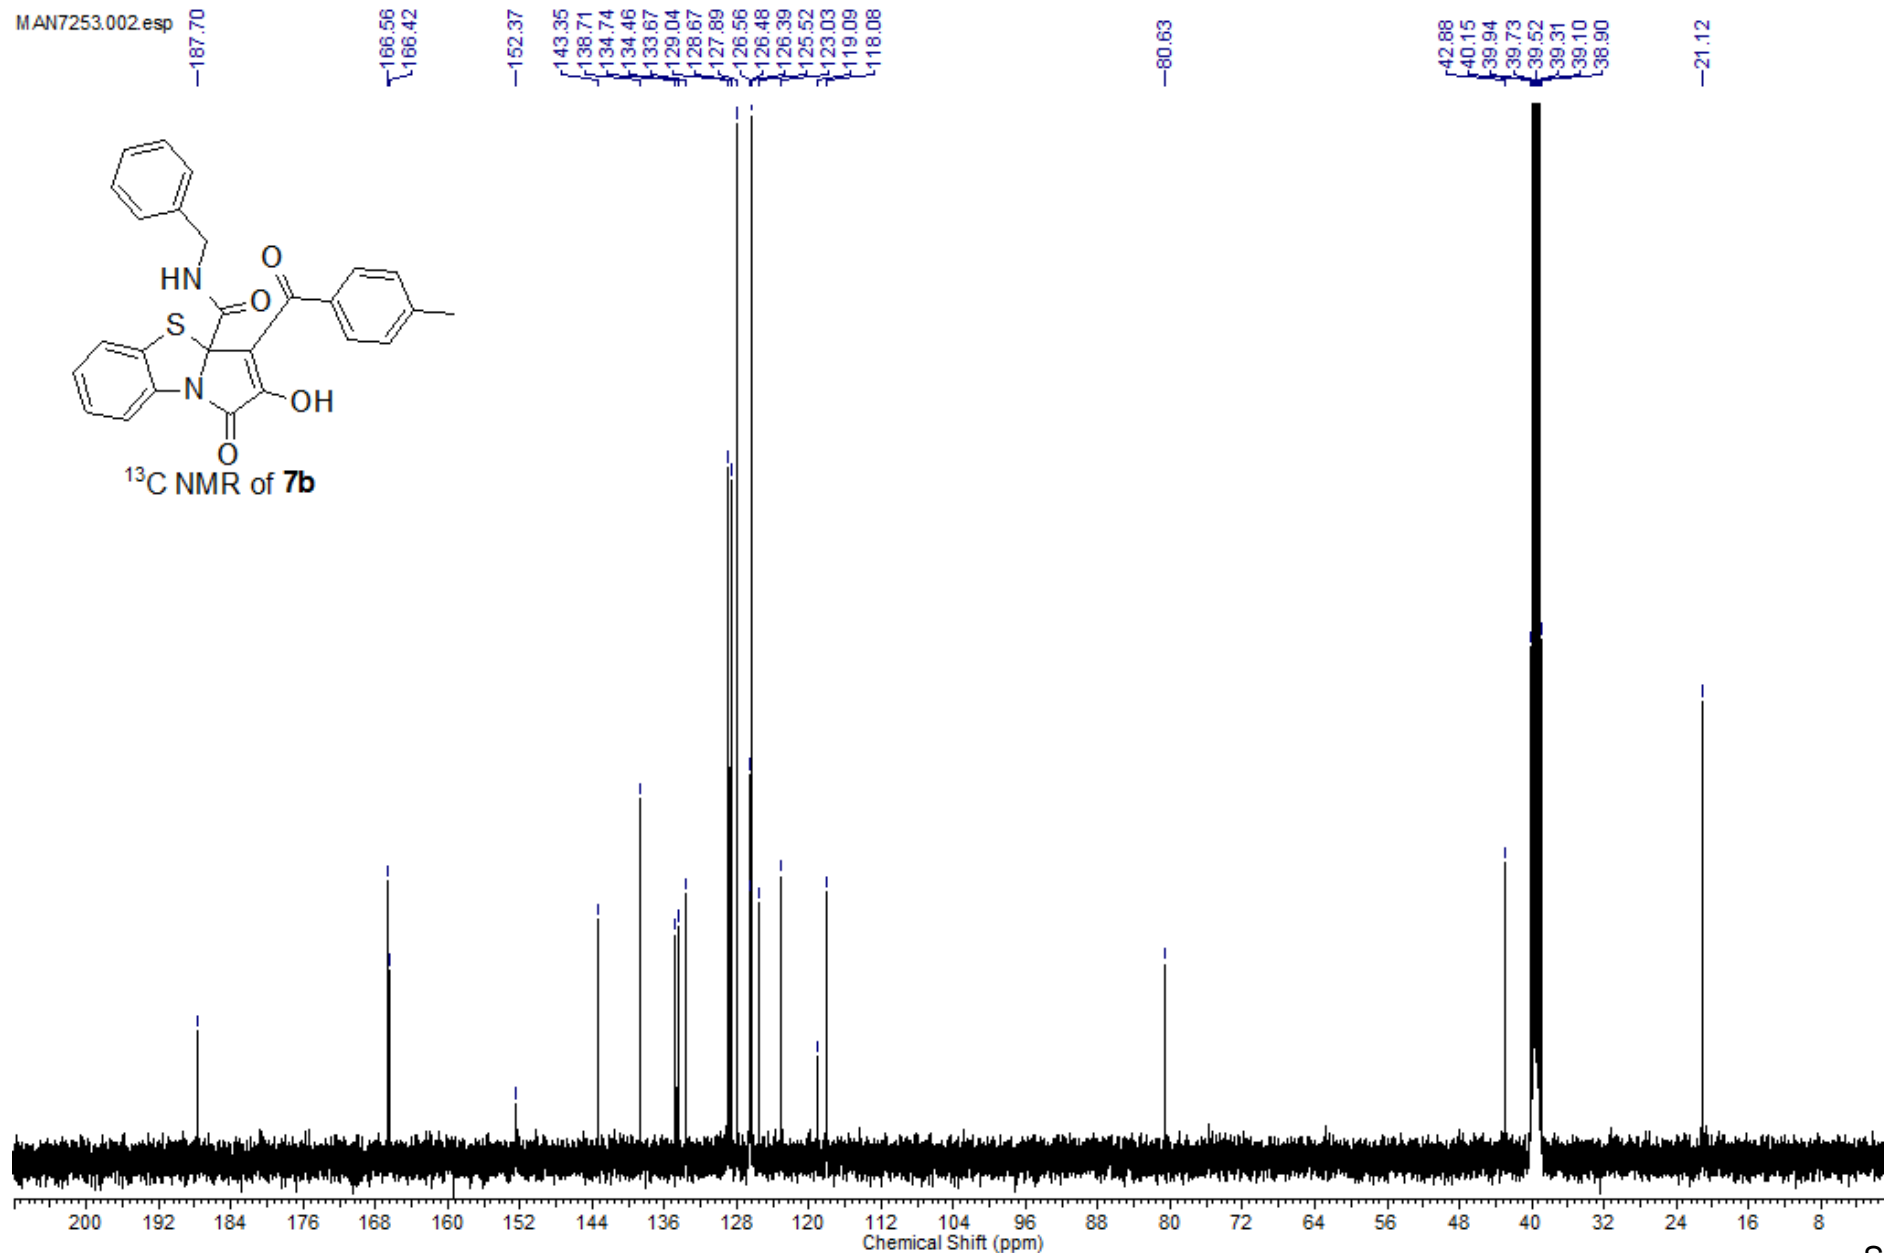

MAN7253.003.esp

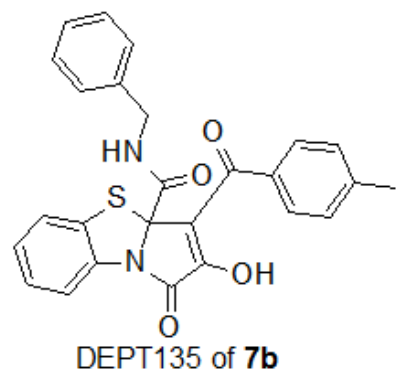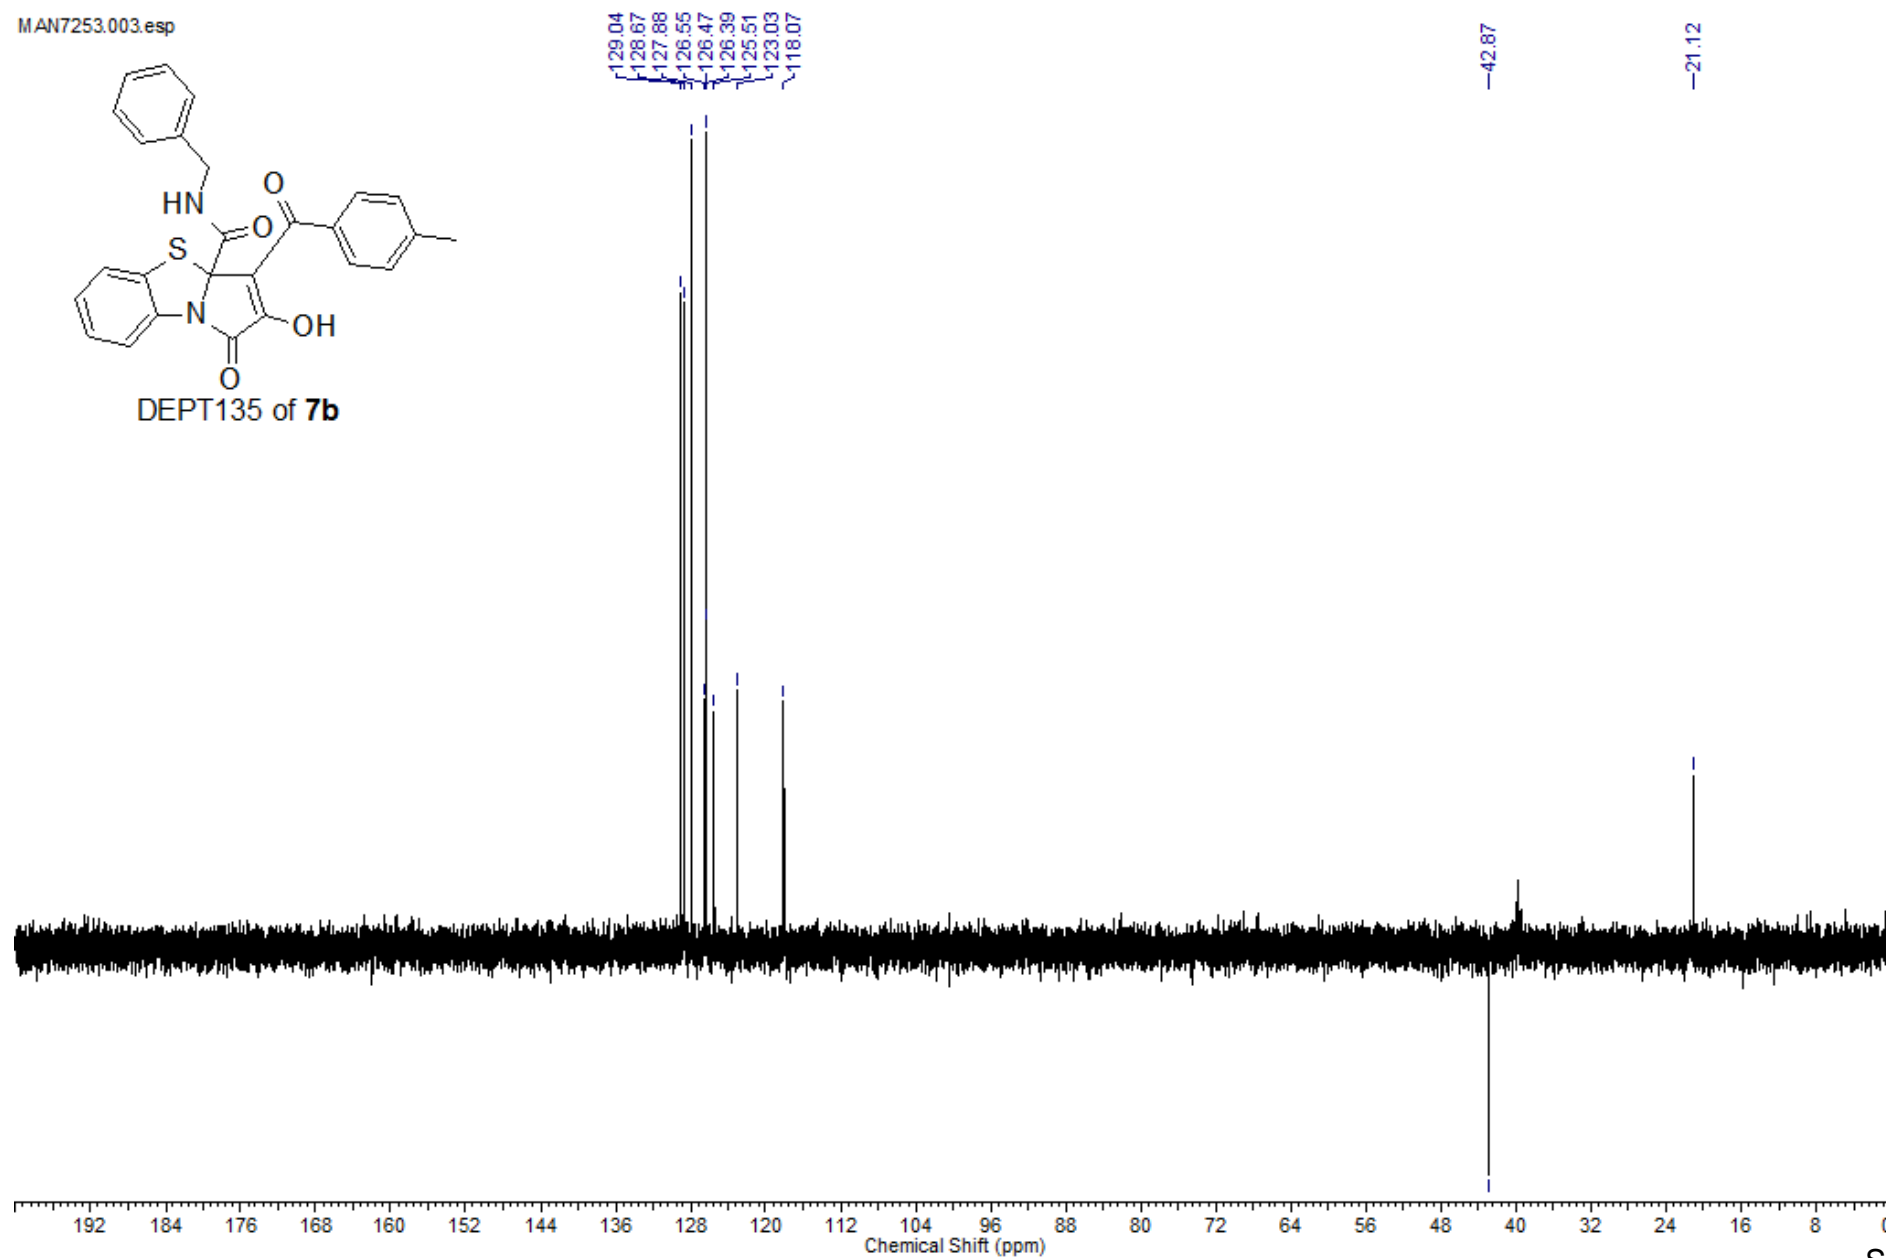

MAN7774.001.esp

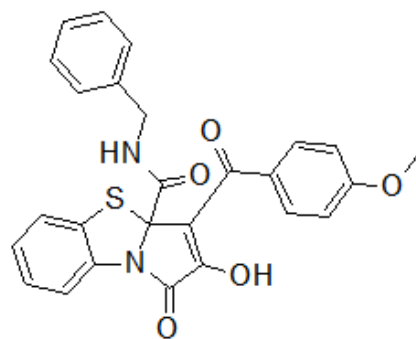

<sup>1</sup>H NMR of 7c

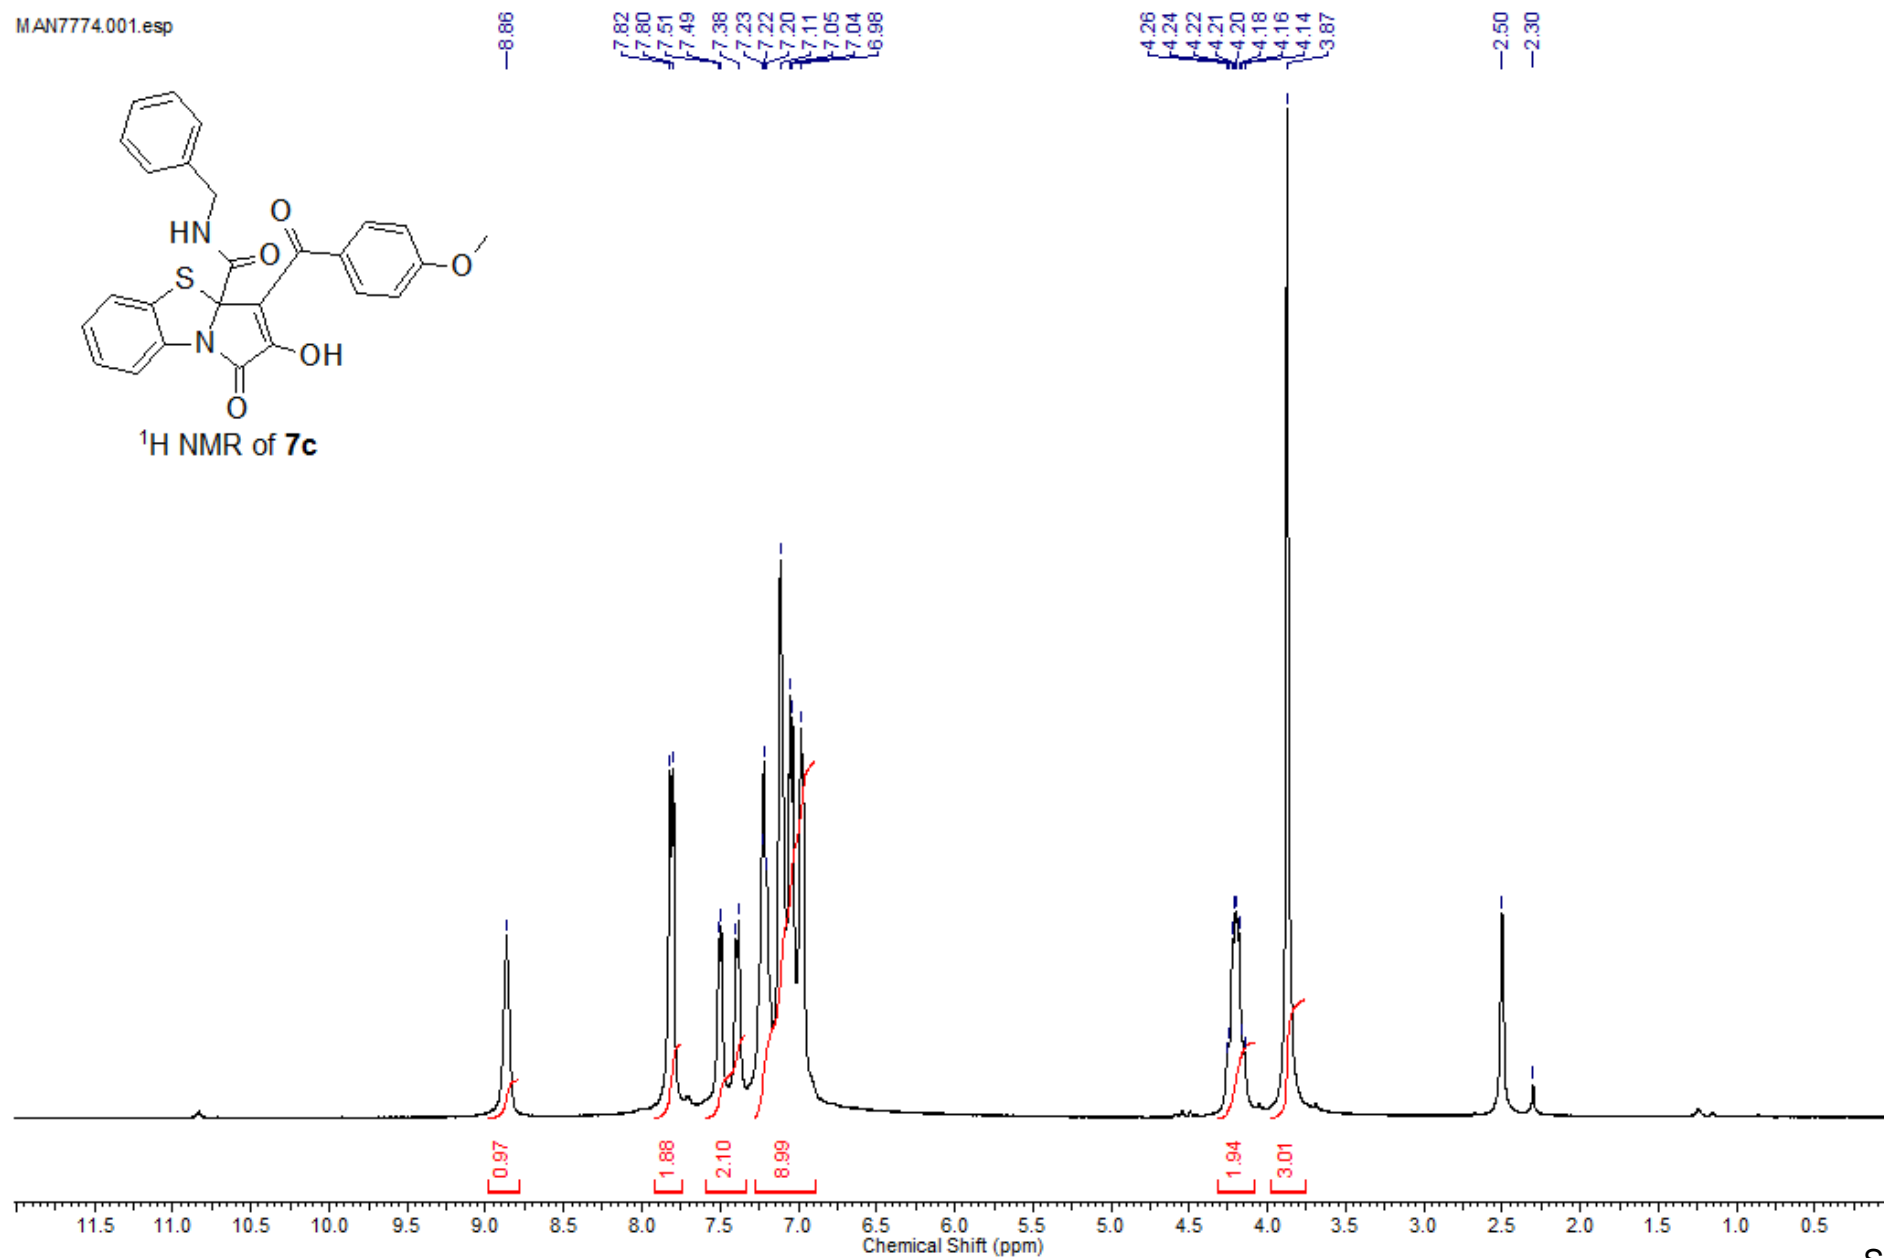

MAN7774.002.esp

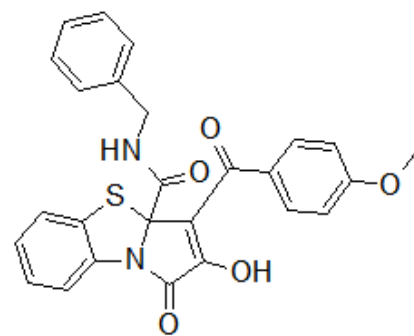

$^{13}\text{C}$  NMR of **7c**

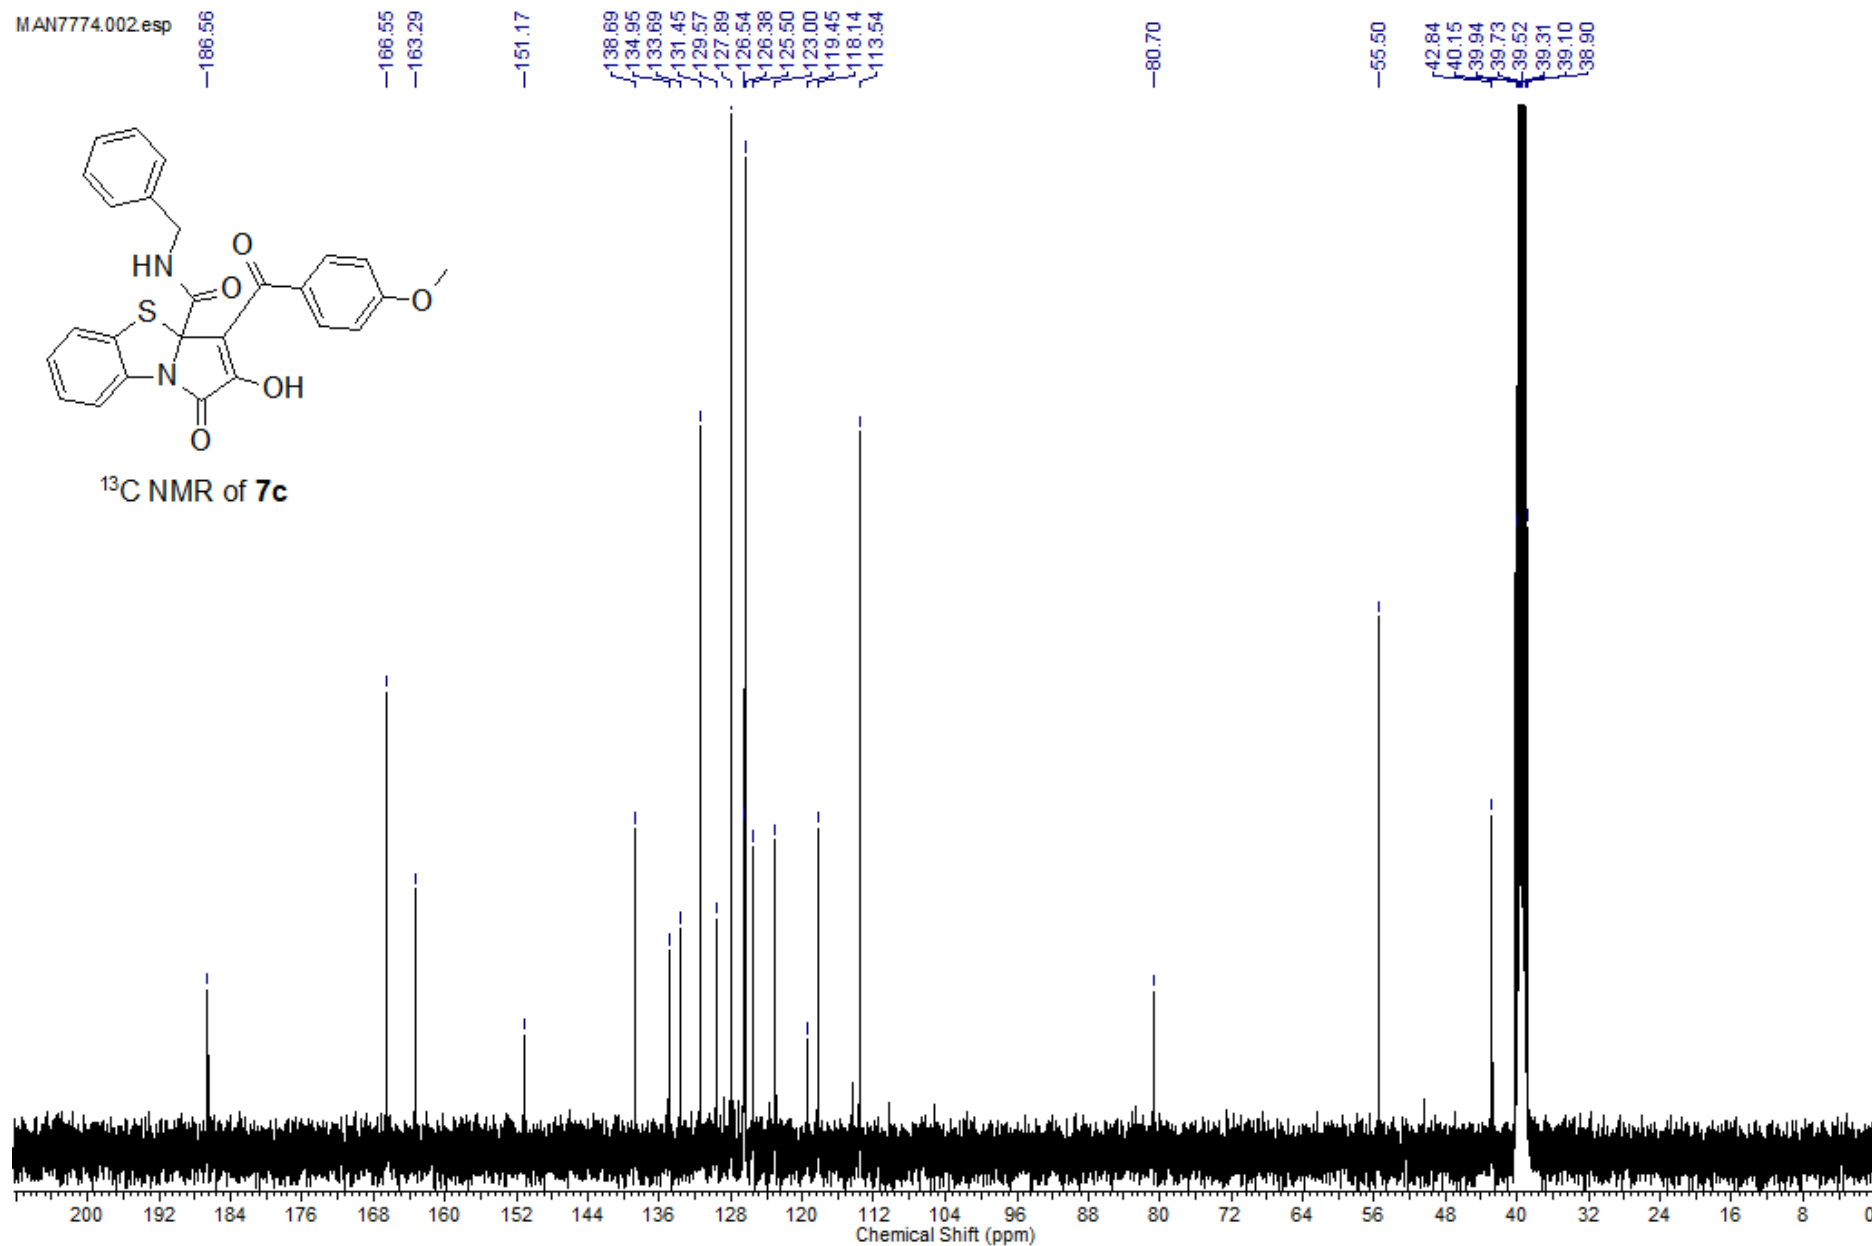

MAN7774.003.esp

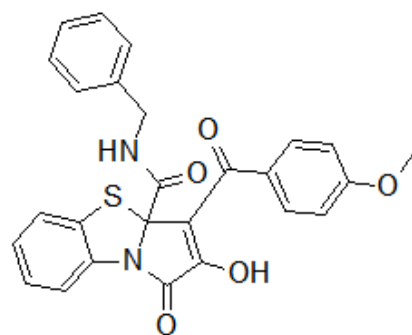

DEPT 135 of **7c**

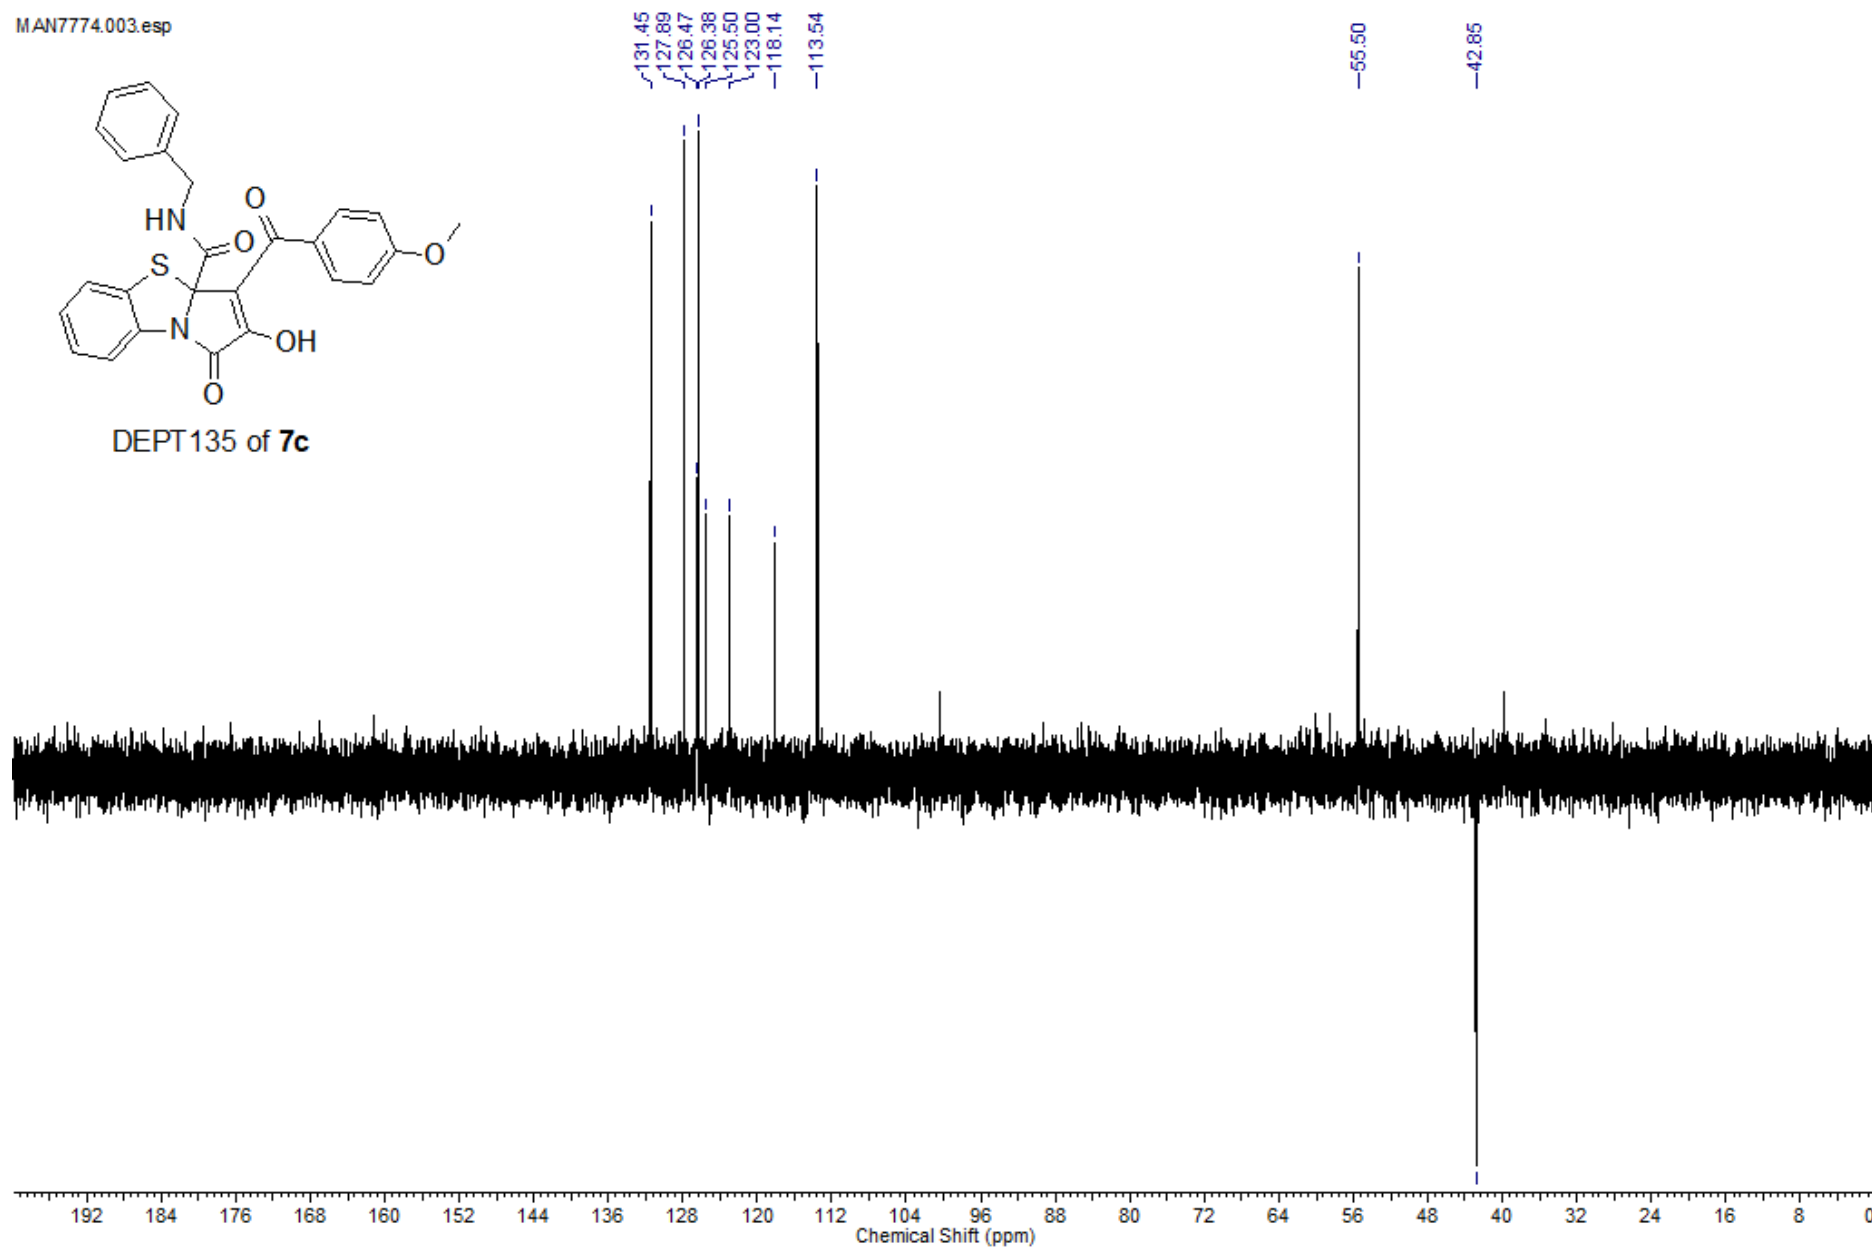

MAN7897.004.esp

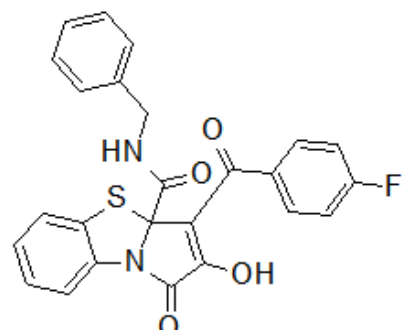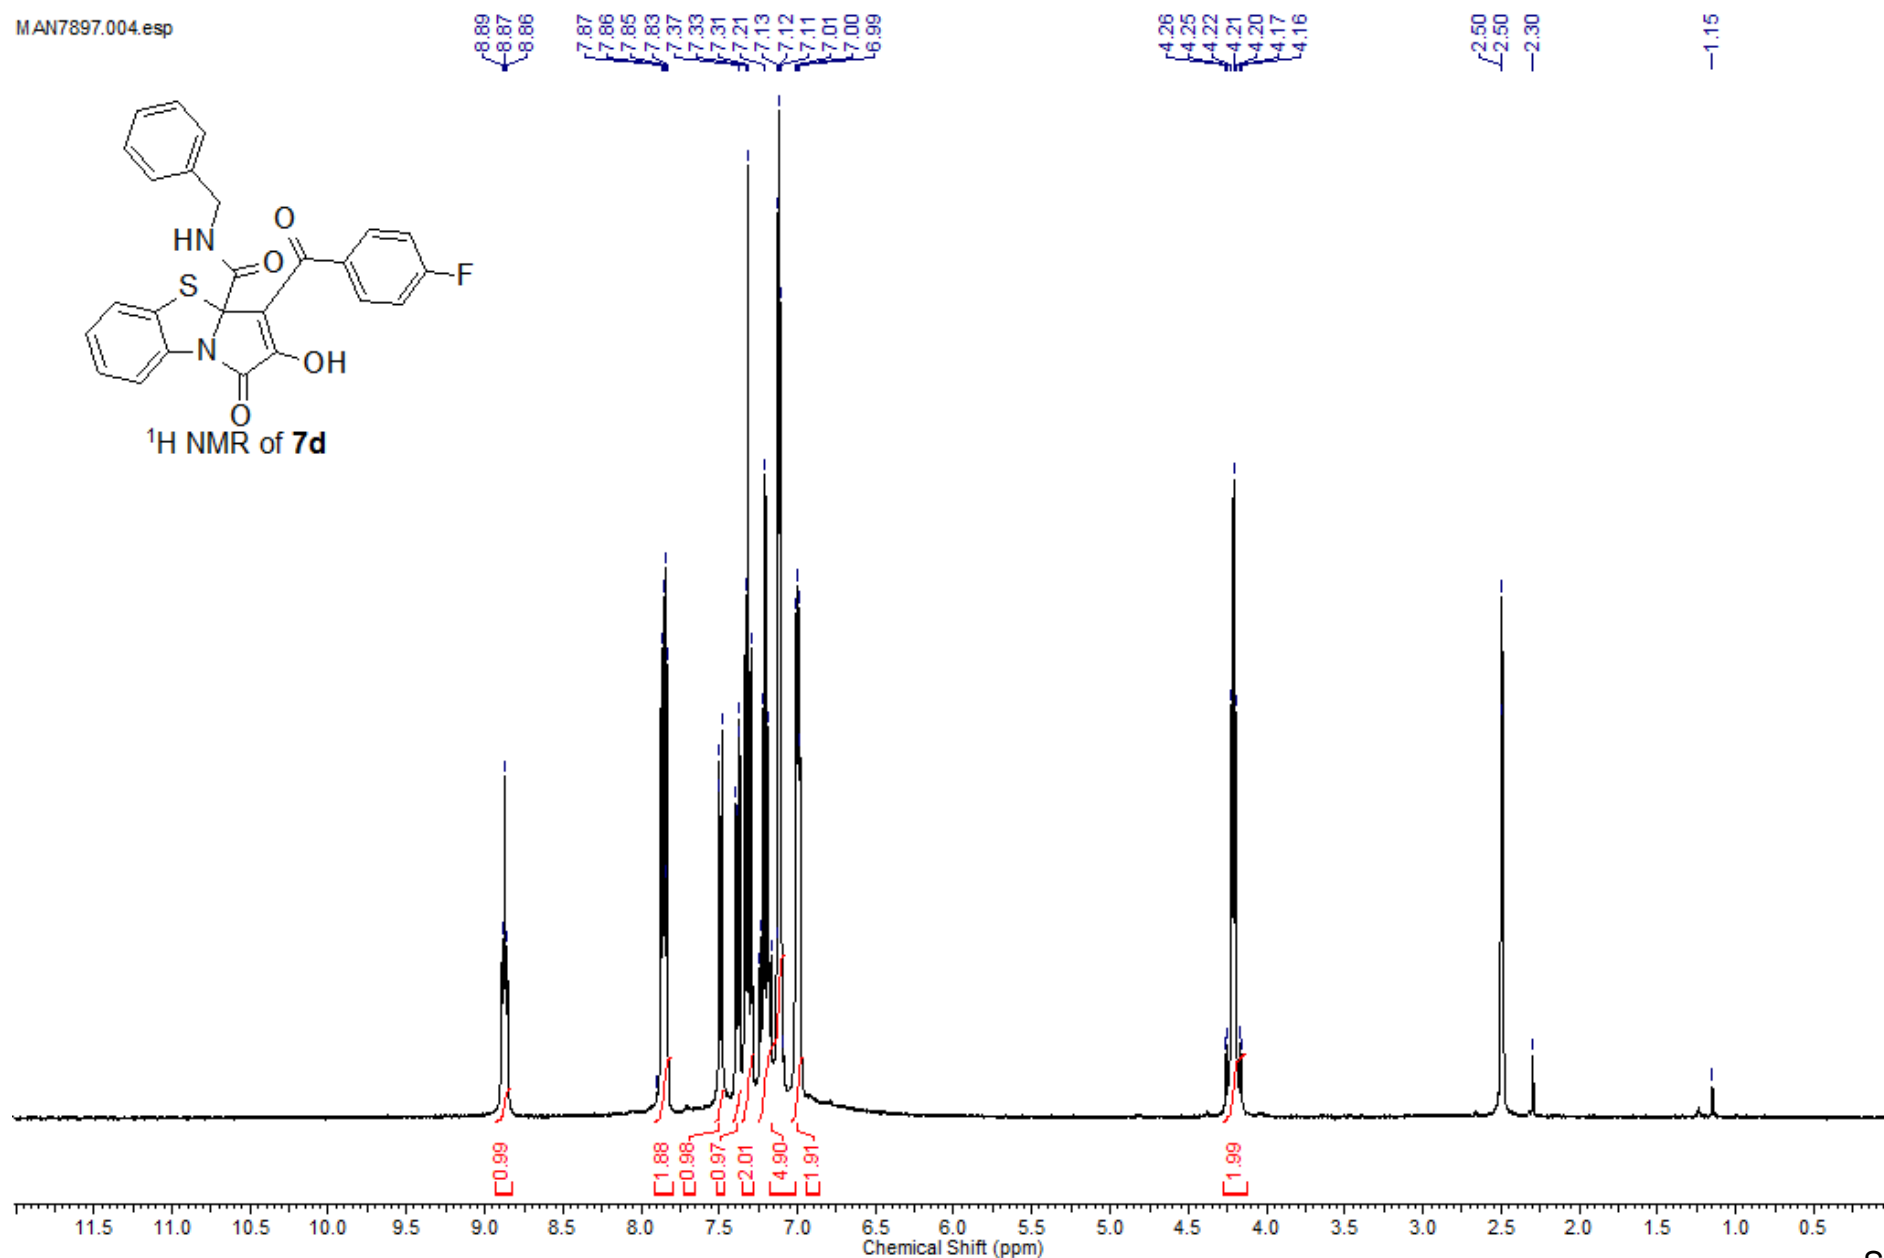



MAN7897.0027  
-186.87

166.63  
166.32  
165.97  
163.47

153.76

136.72  
134.58  
133.79  
133.71  
131.81  
131.71  
127.90  
126.49  
126.40  
125.52  
123.05  
118.29  
118.01  
115.25  
115.03

-80.59

42.90  
40.15  
39.94  
39.73  
39.52  
39.31  
39.10  
38.89

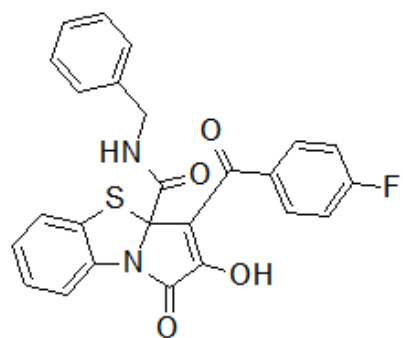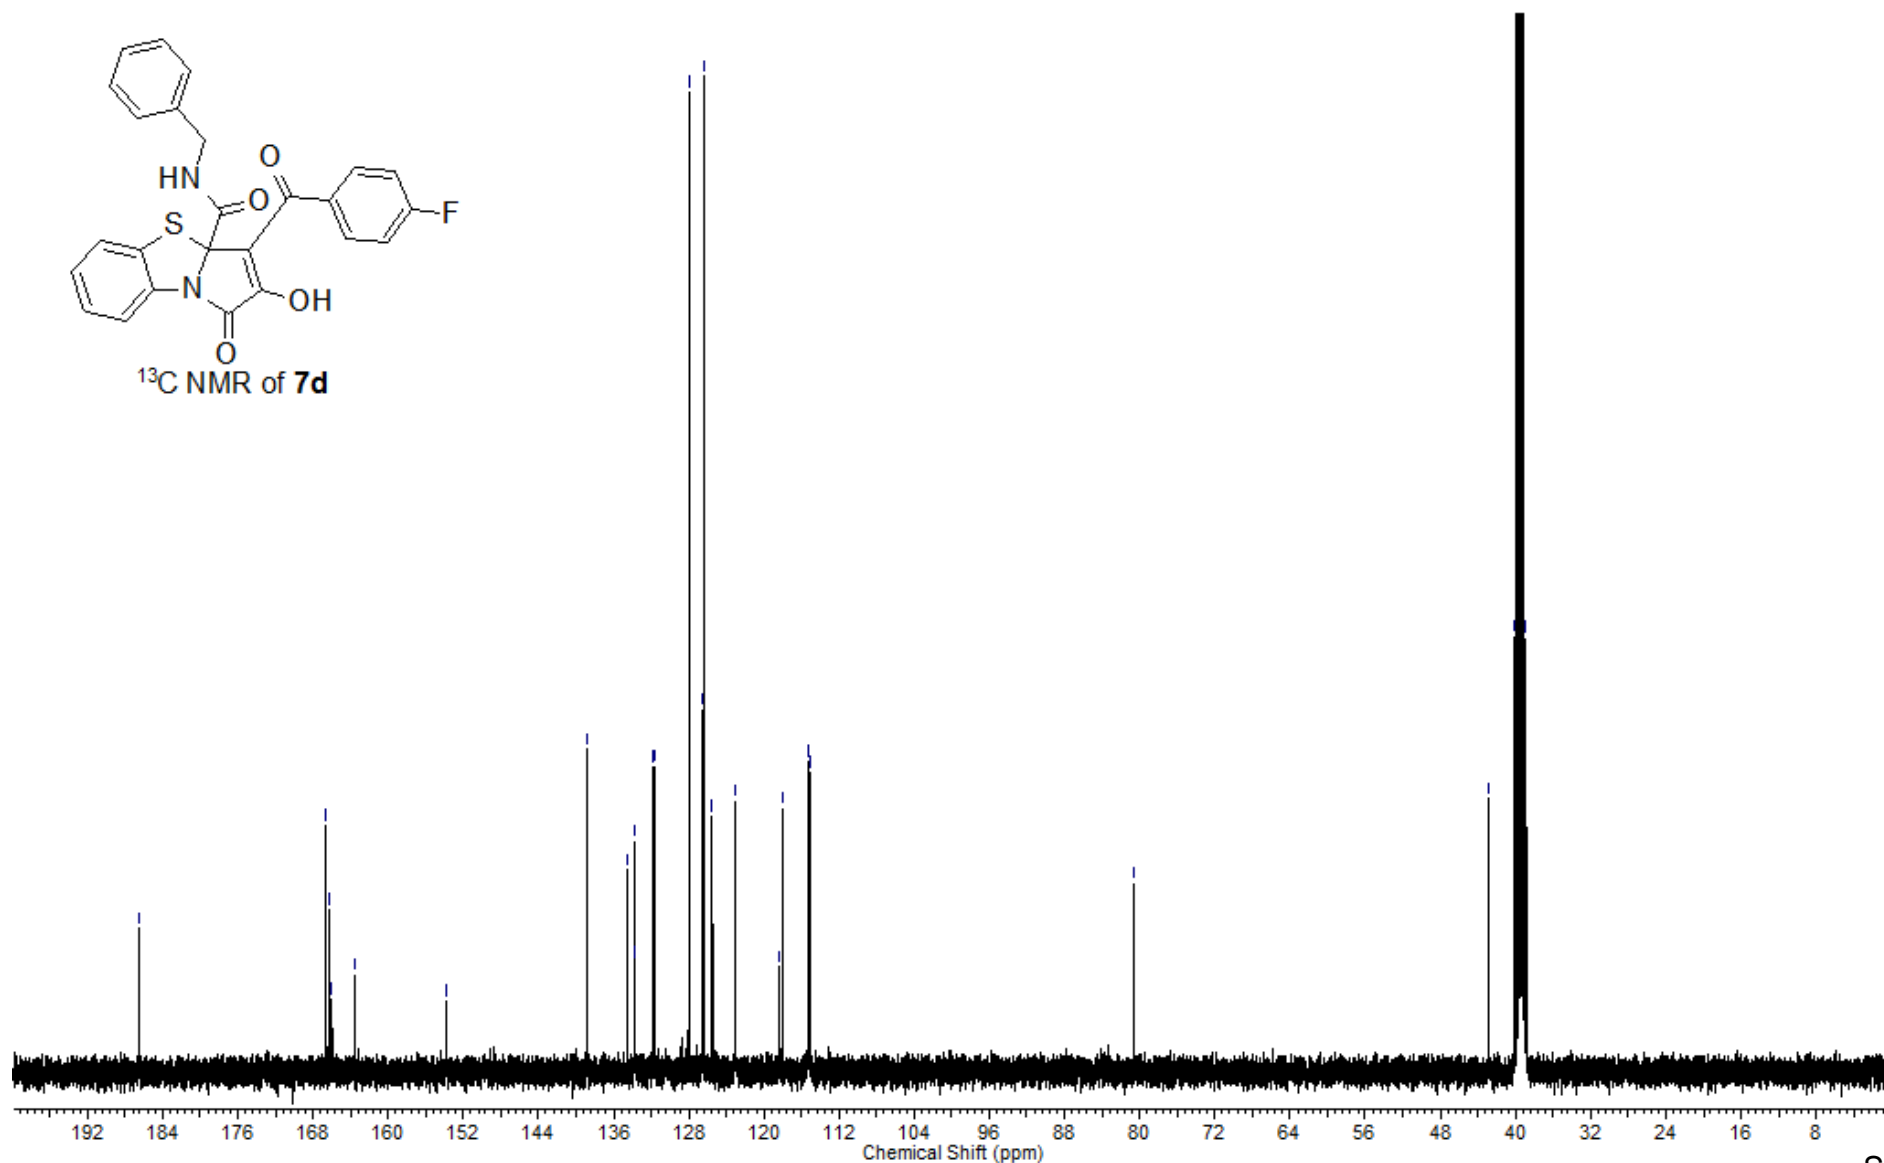

MAN7897.003.esp

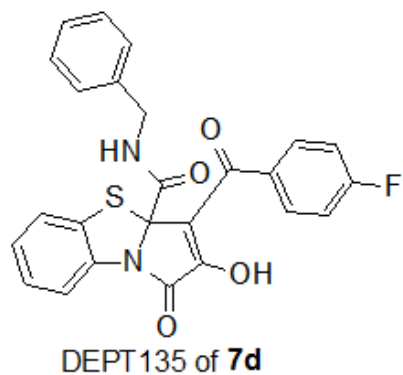

131.81  
131.72  
127.90  
126.57  
126.50  
126.41  
125.52  
123.05  
118.02  
115.26  
115.04

42.90

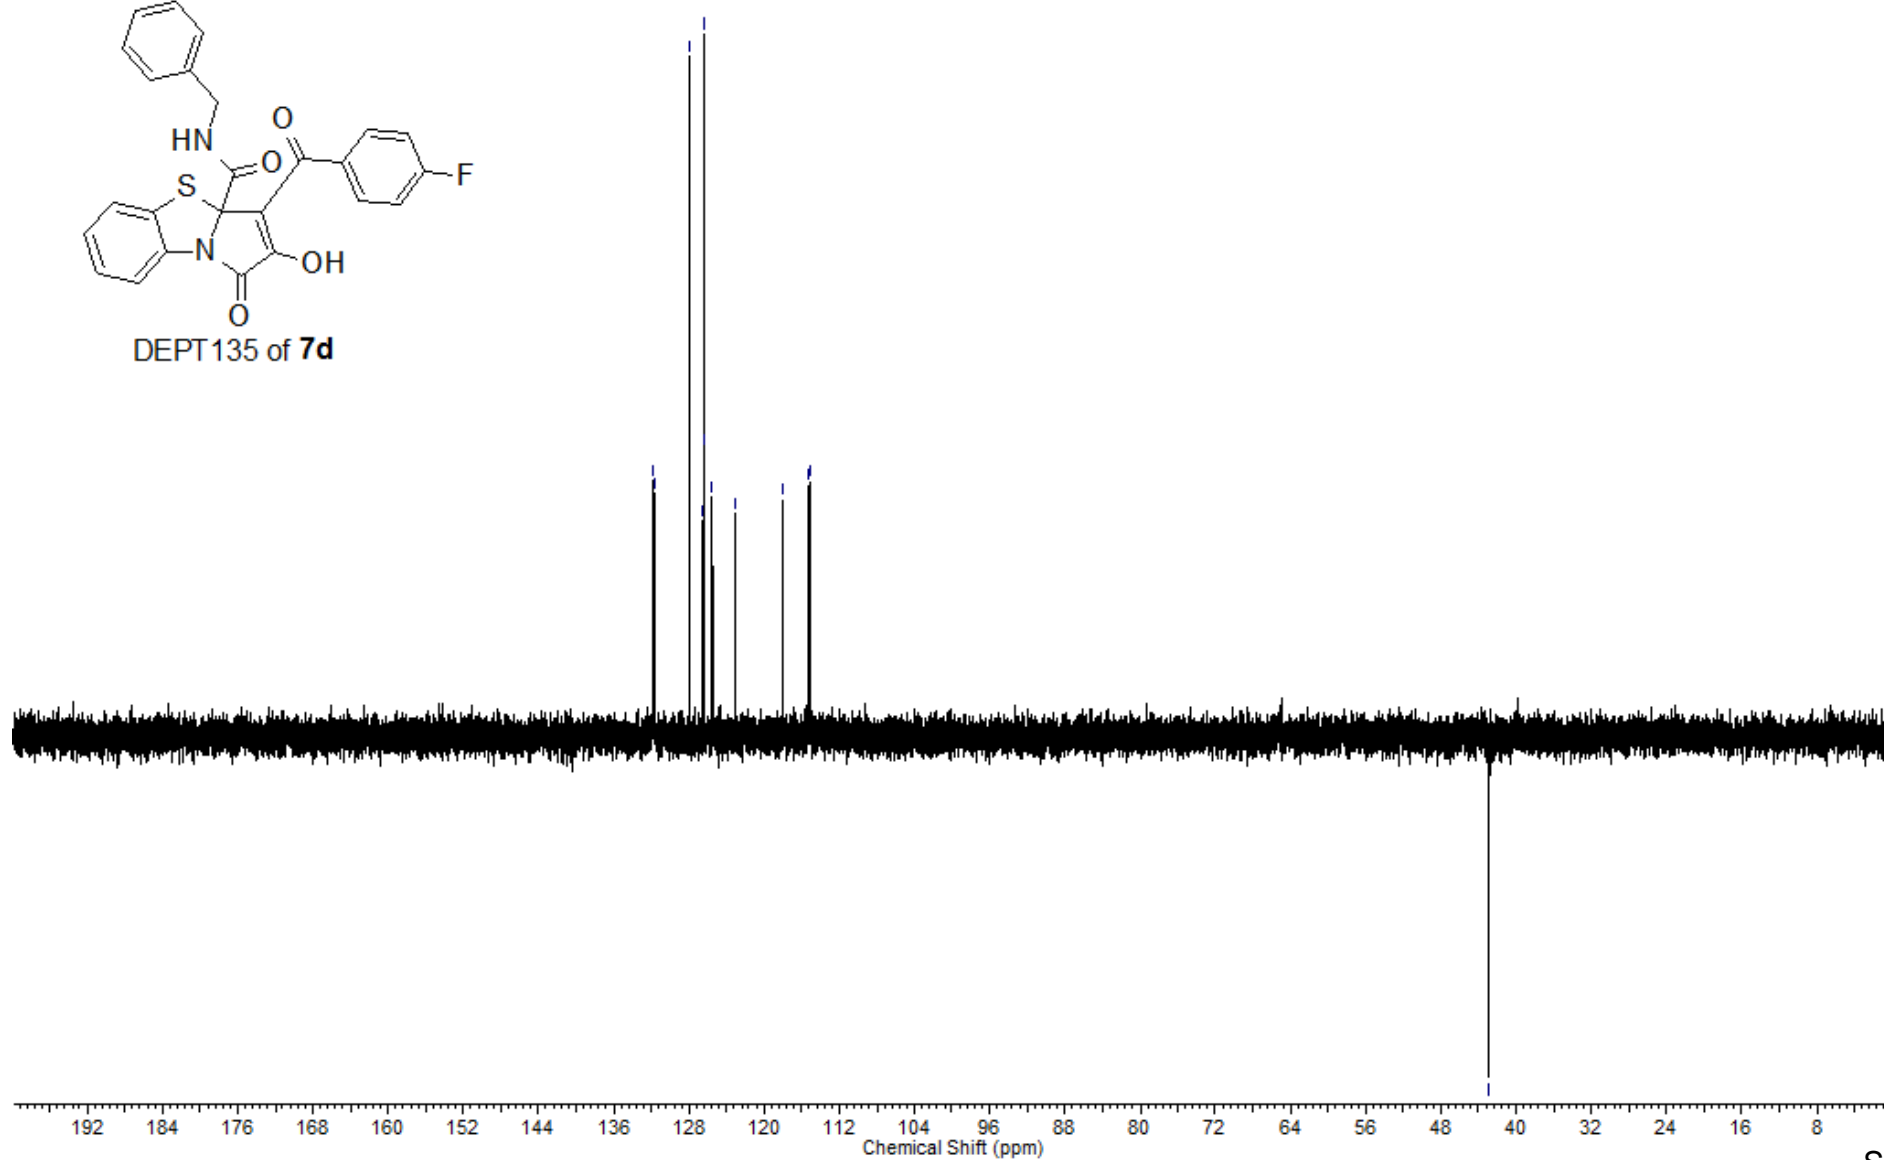

MAN7252.001.esp

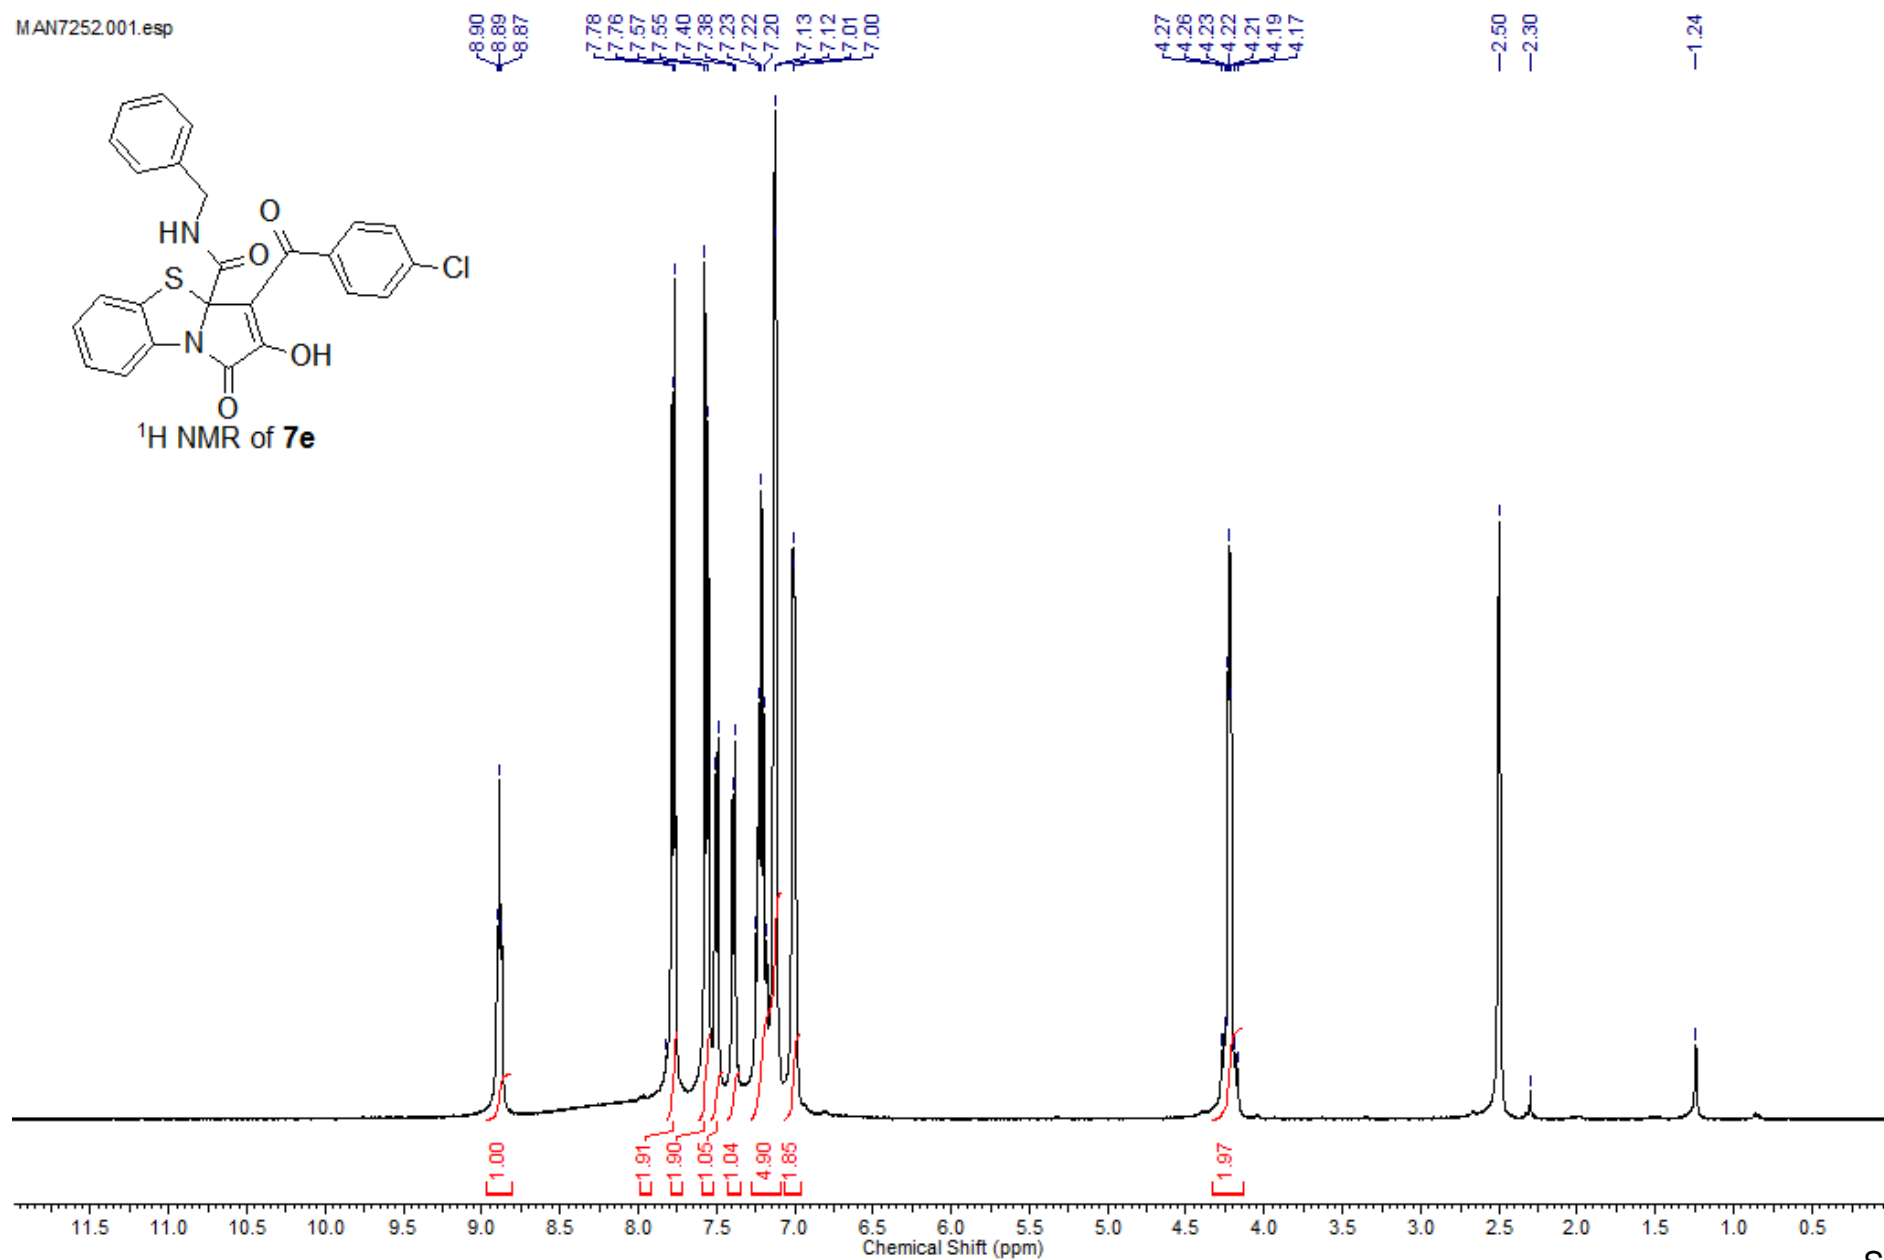

MAN7252.002.esp

186.55

166.76  
166.25

154.98

138.74  
137.34  
136.08  
134.37  
133.77  
130.62  
128.16  
127.91  
126.53  
126.41  
125.51  
123.05  
117.93  
117.72

80.50

42.89  
40.15  
39.94  
39.73  
39.52  
39.31  
39.10  
38.89

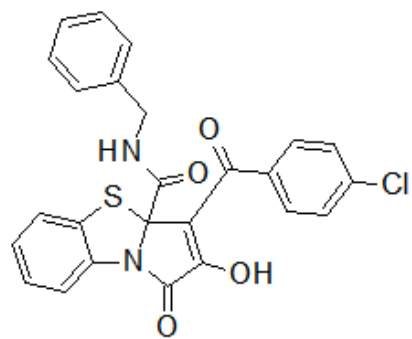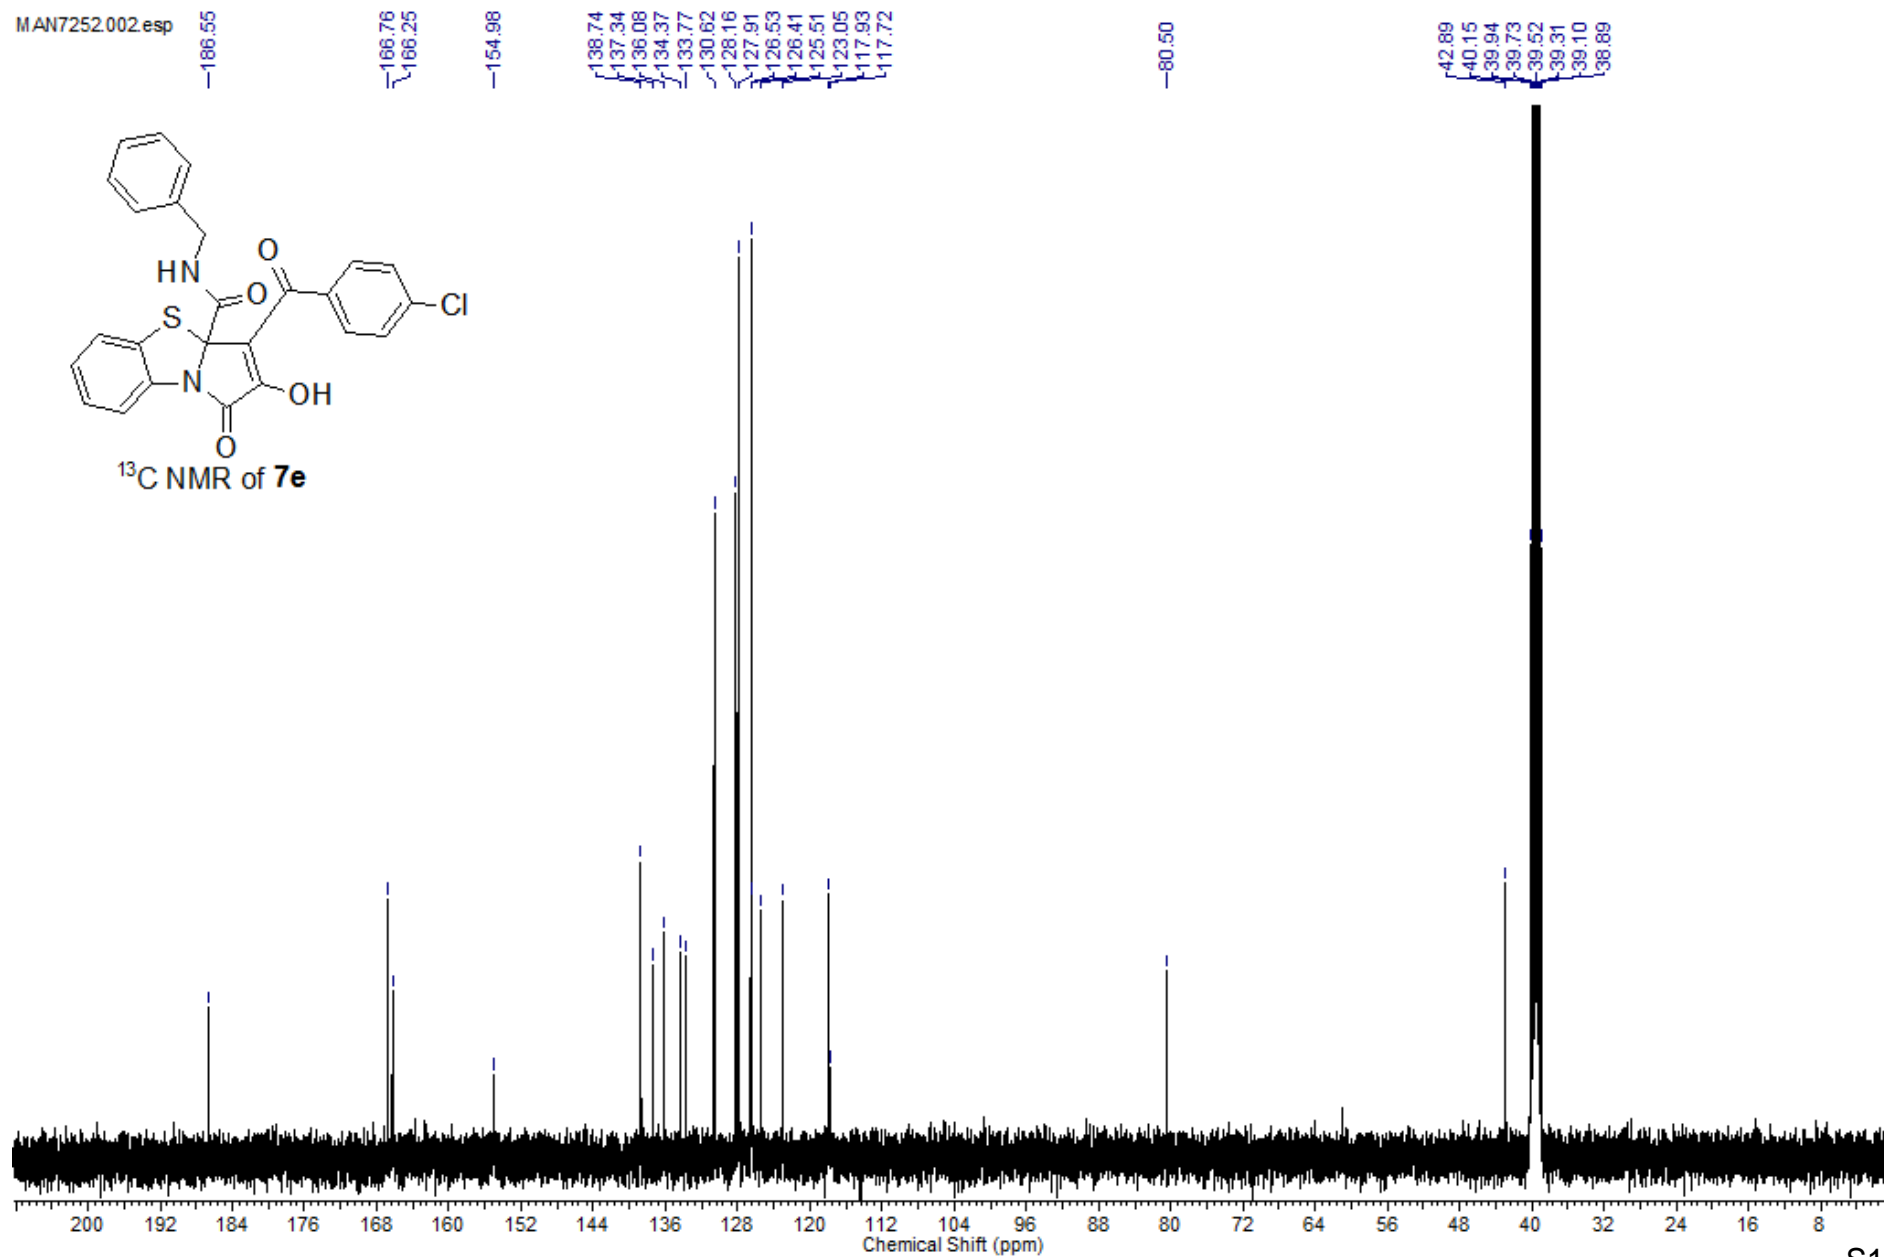

MAN7252.003.esp

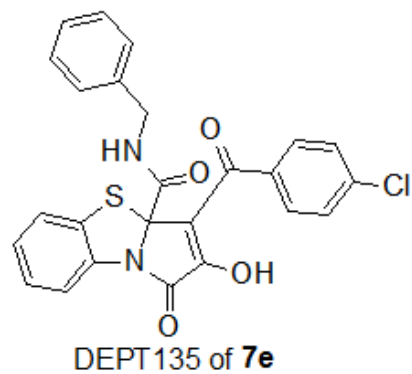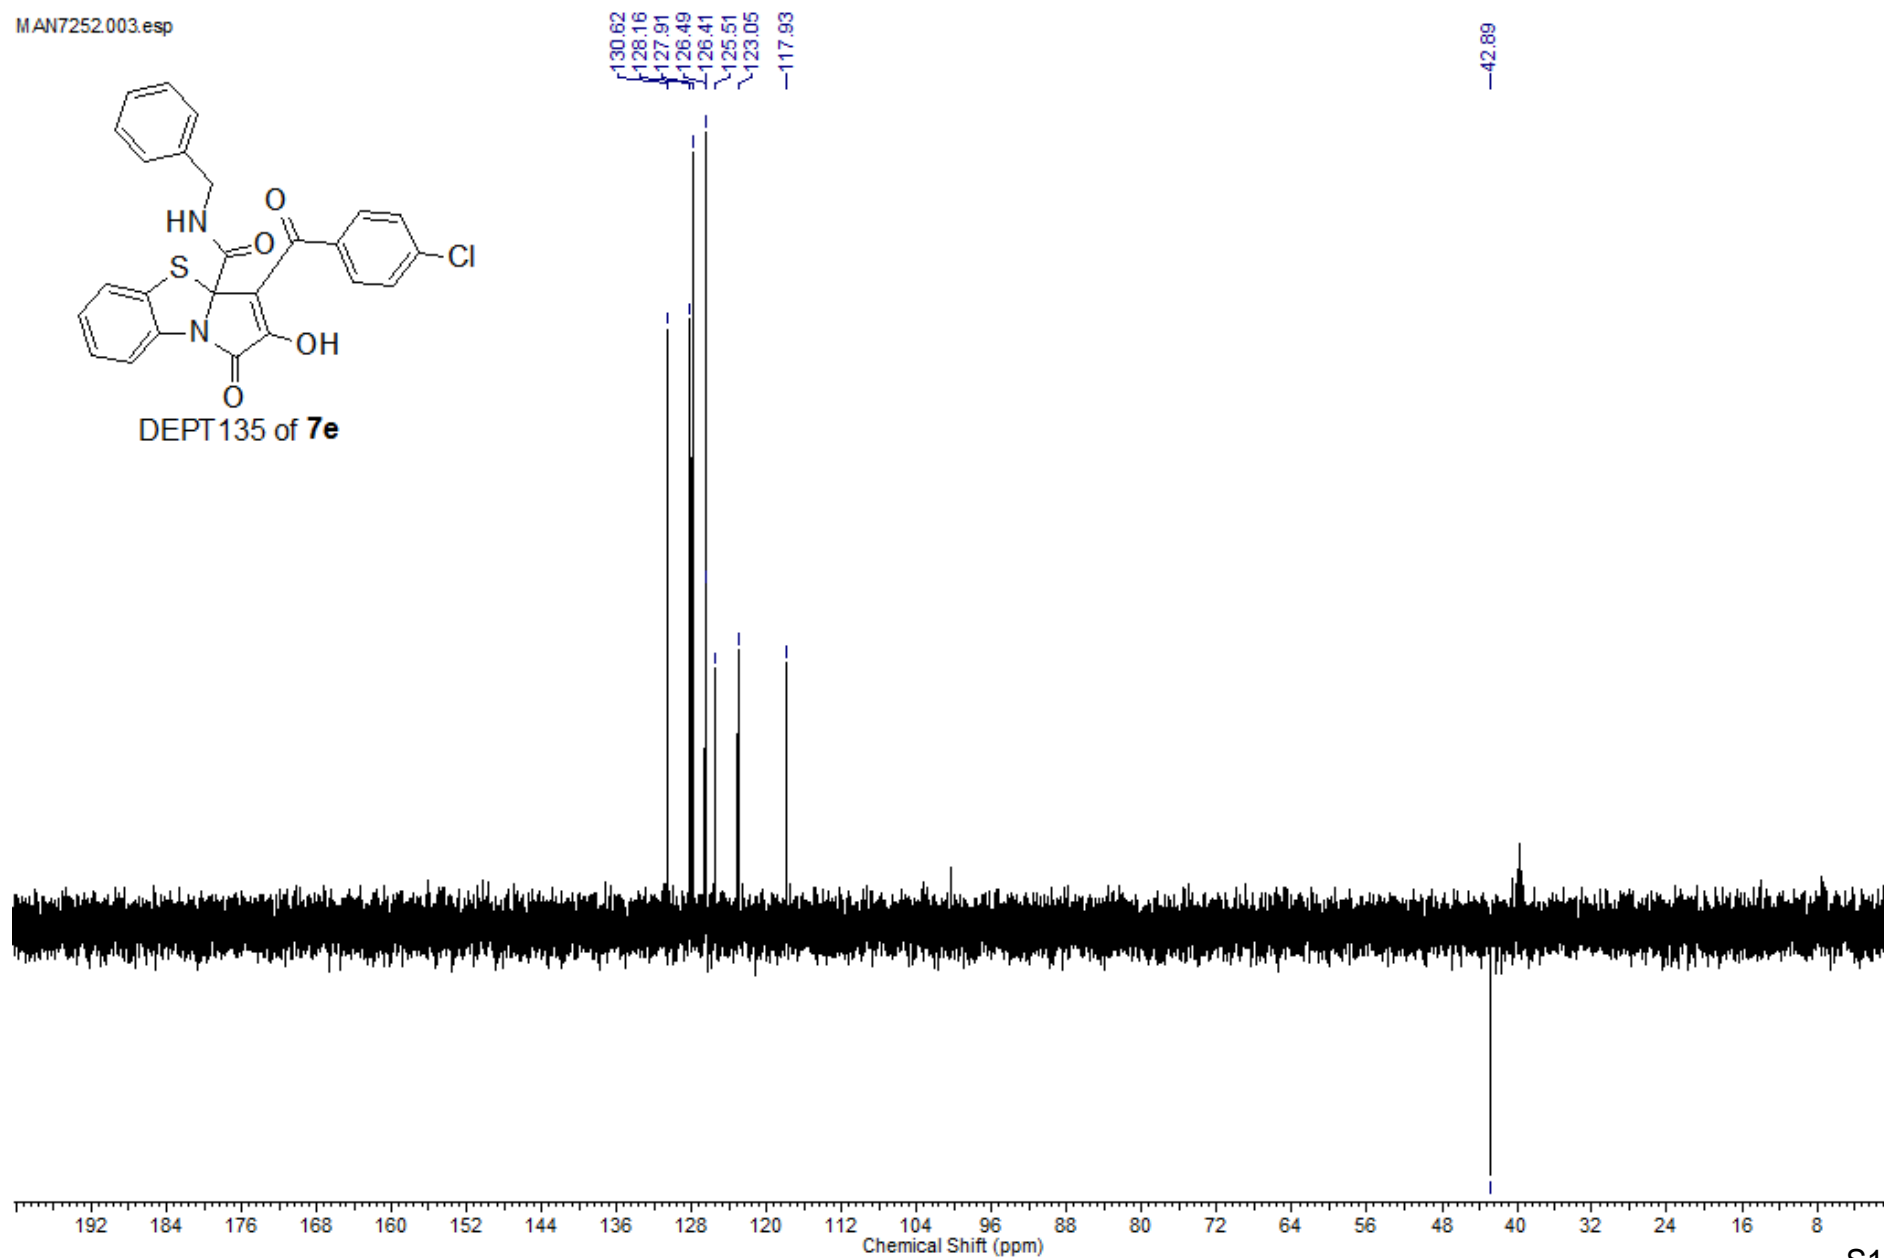

MAN7895.004.esp

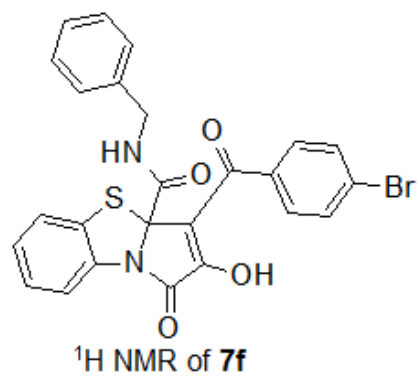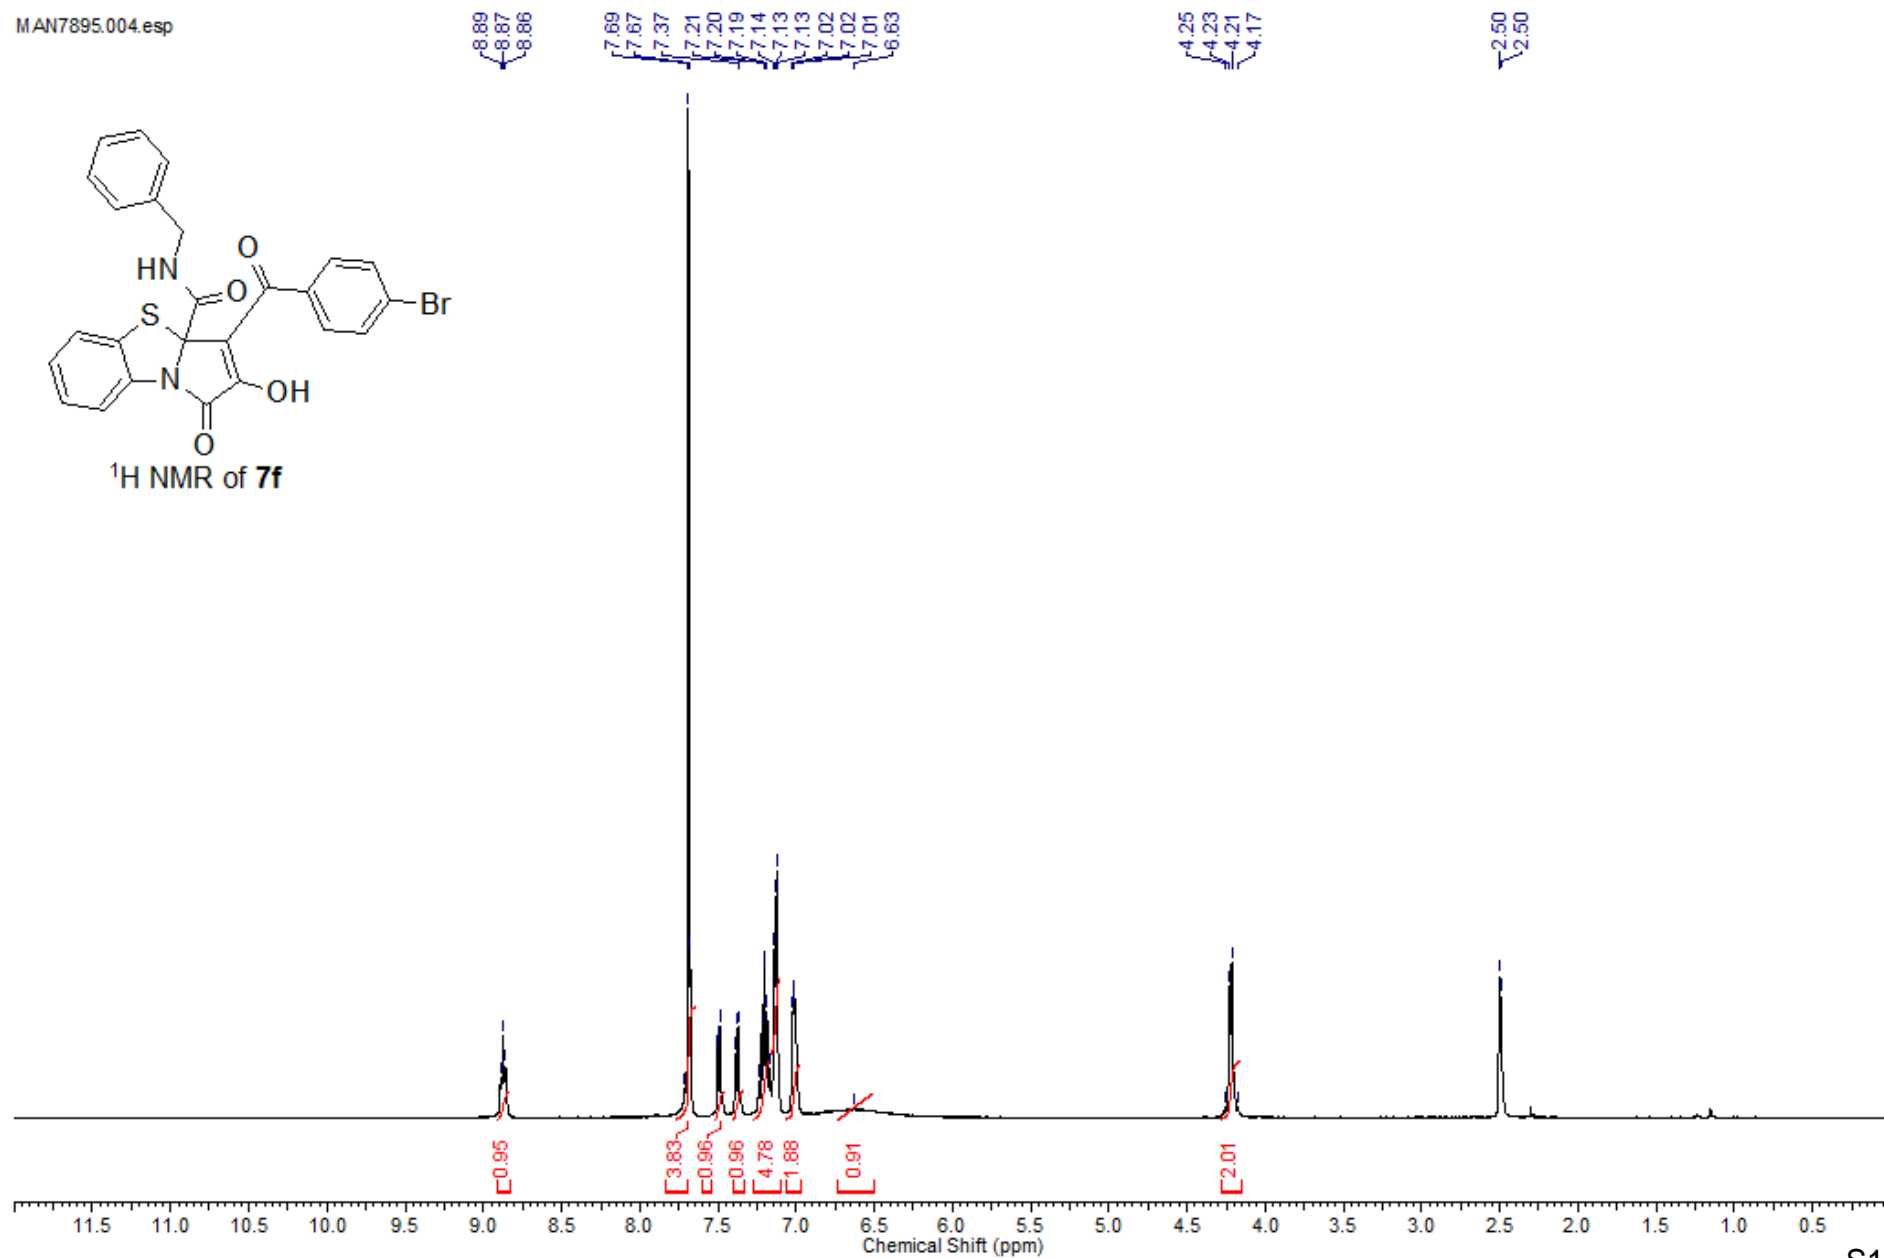

MAN7895.002.esp

186.74

166.73  
166.24

154.97

138.74  
136.43  
134.37  
133.76  
131.11  
130.71  
127.91  
126.49  
126.41  
125.51  
123.05  
117.93  
117.73

80.49

42.90  
40.15  
39.94  
39.73  
39.52  
39.31  
39.11  
38.90

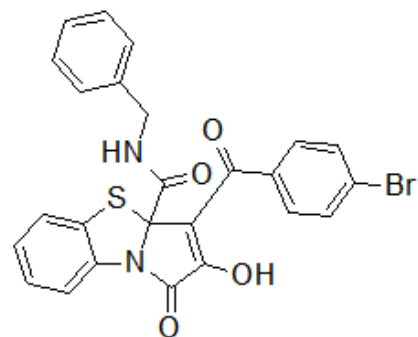

<sup>13</sup>C NMR of **7f**

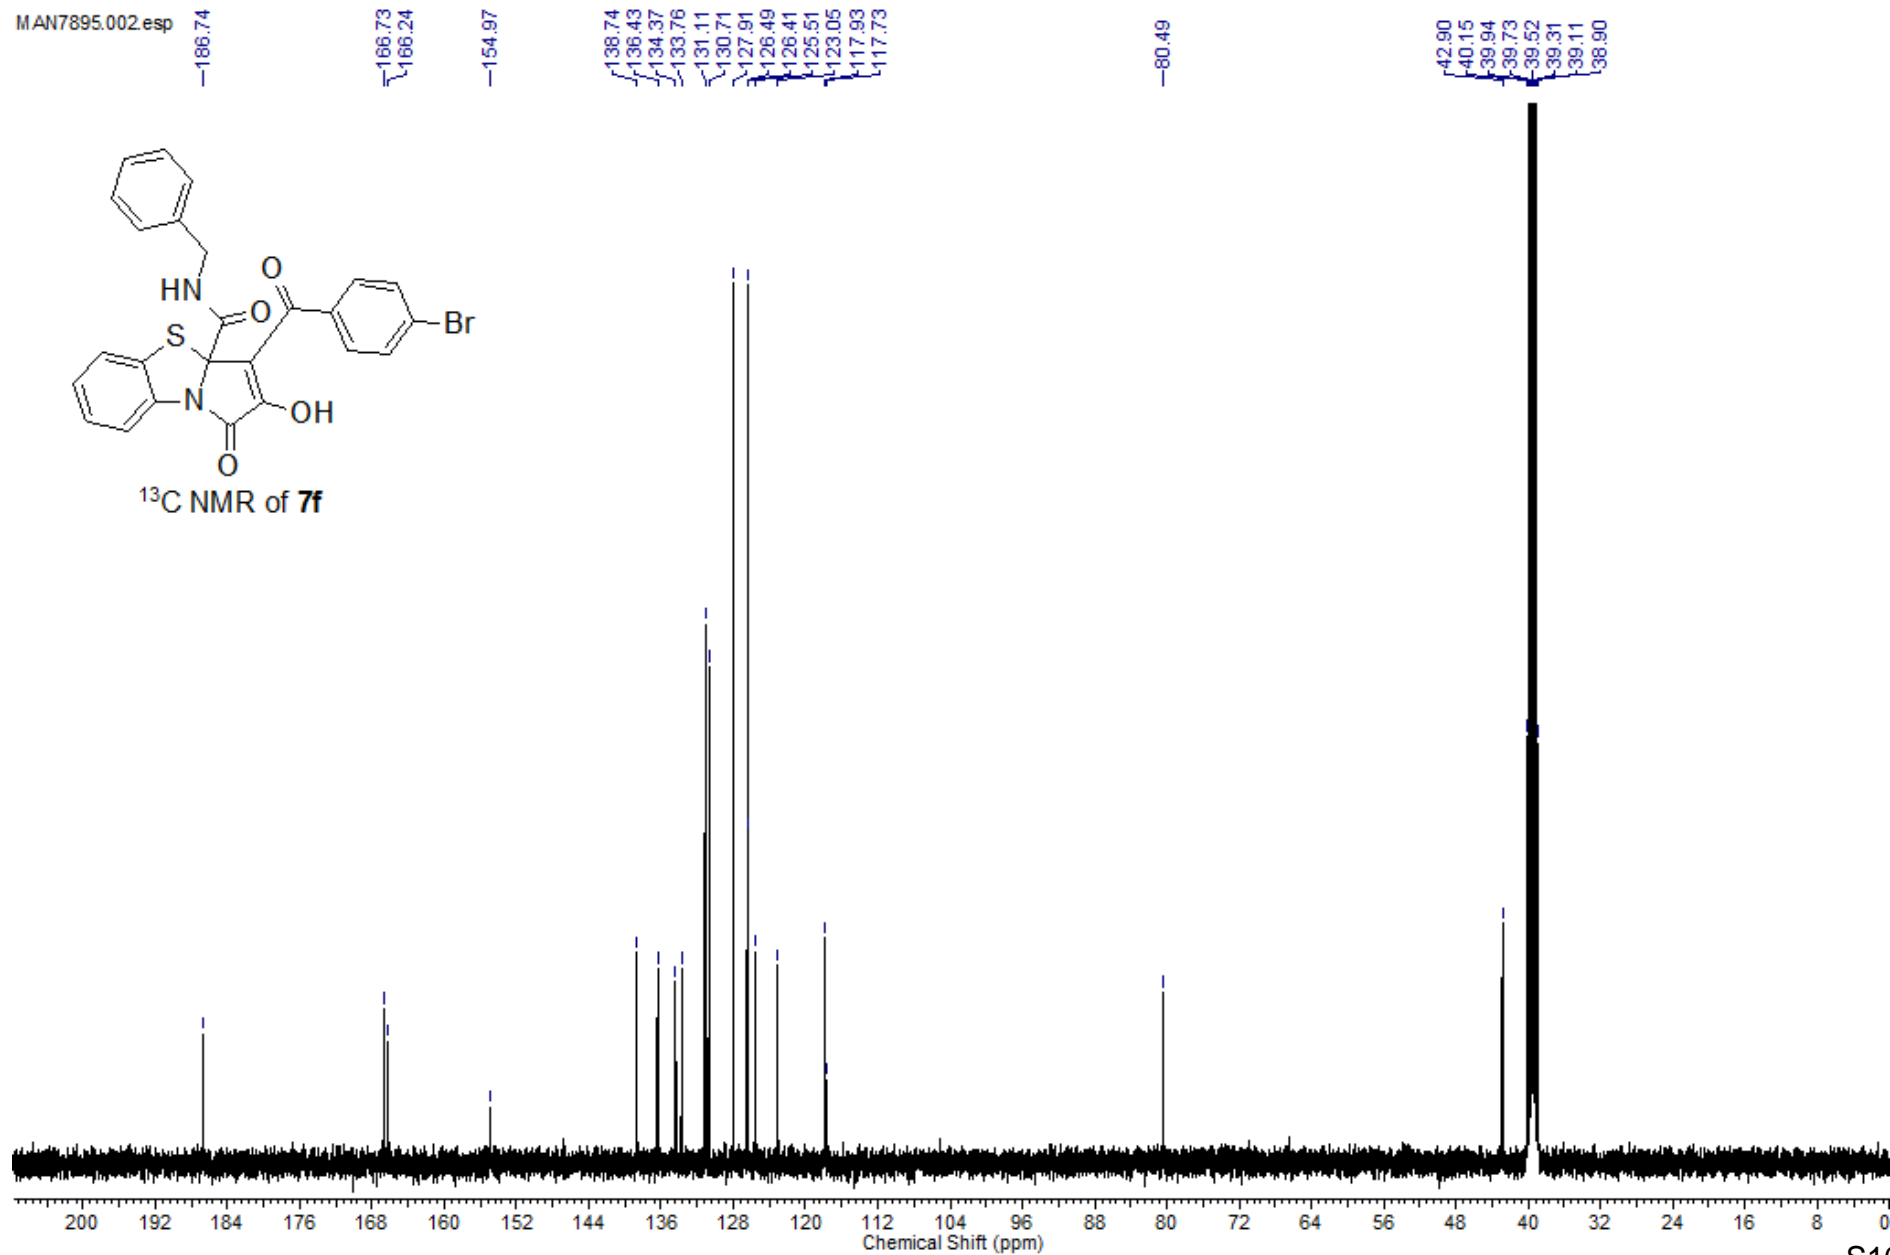

MAN7895.003.esp

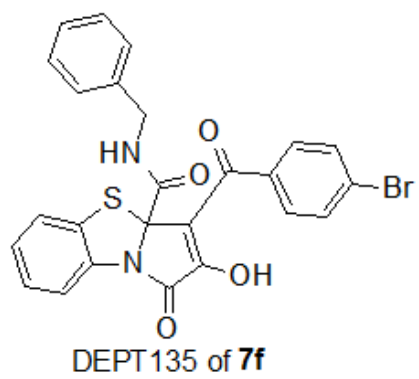

131.11  
130.72  
127.91  
126.49  
126.41  
125.52  
123.05  
117.93

42.90

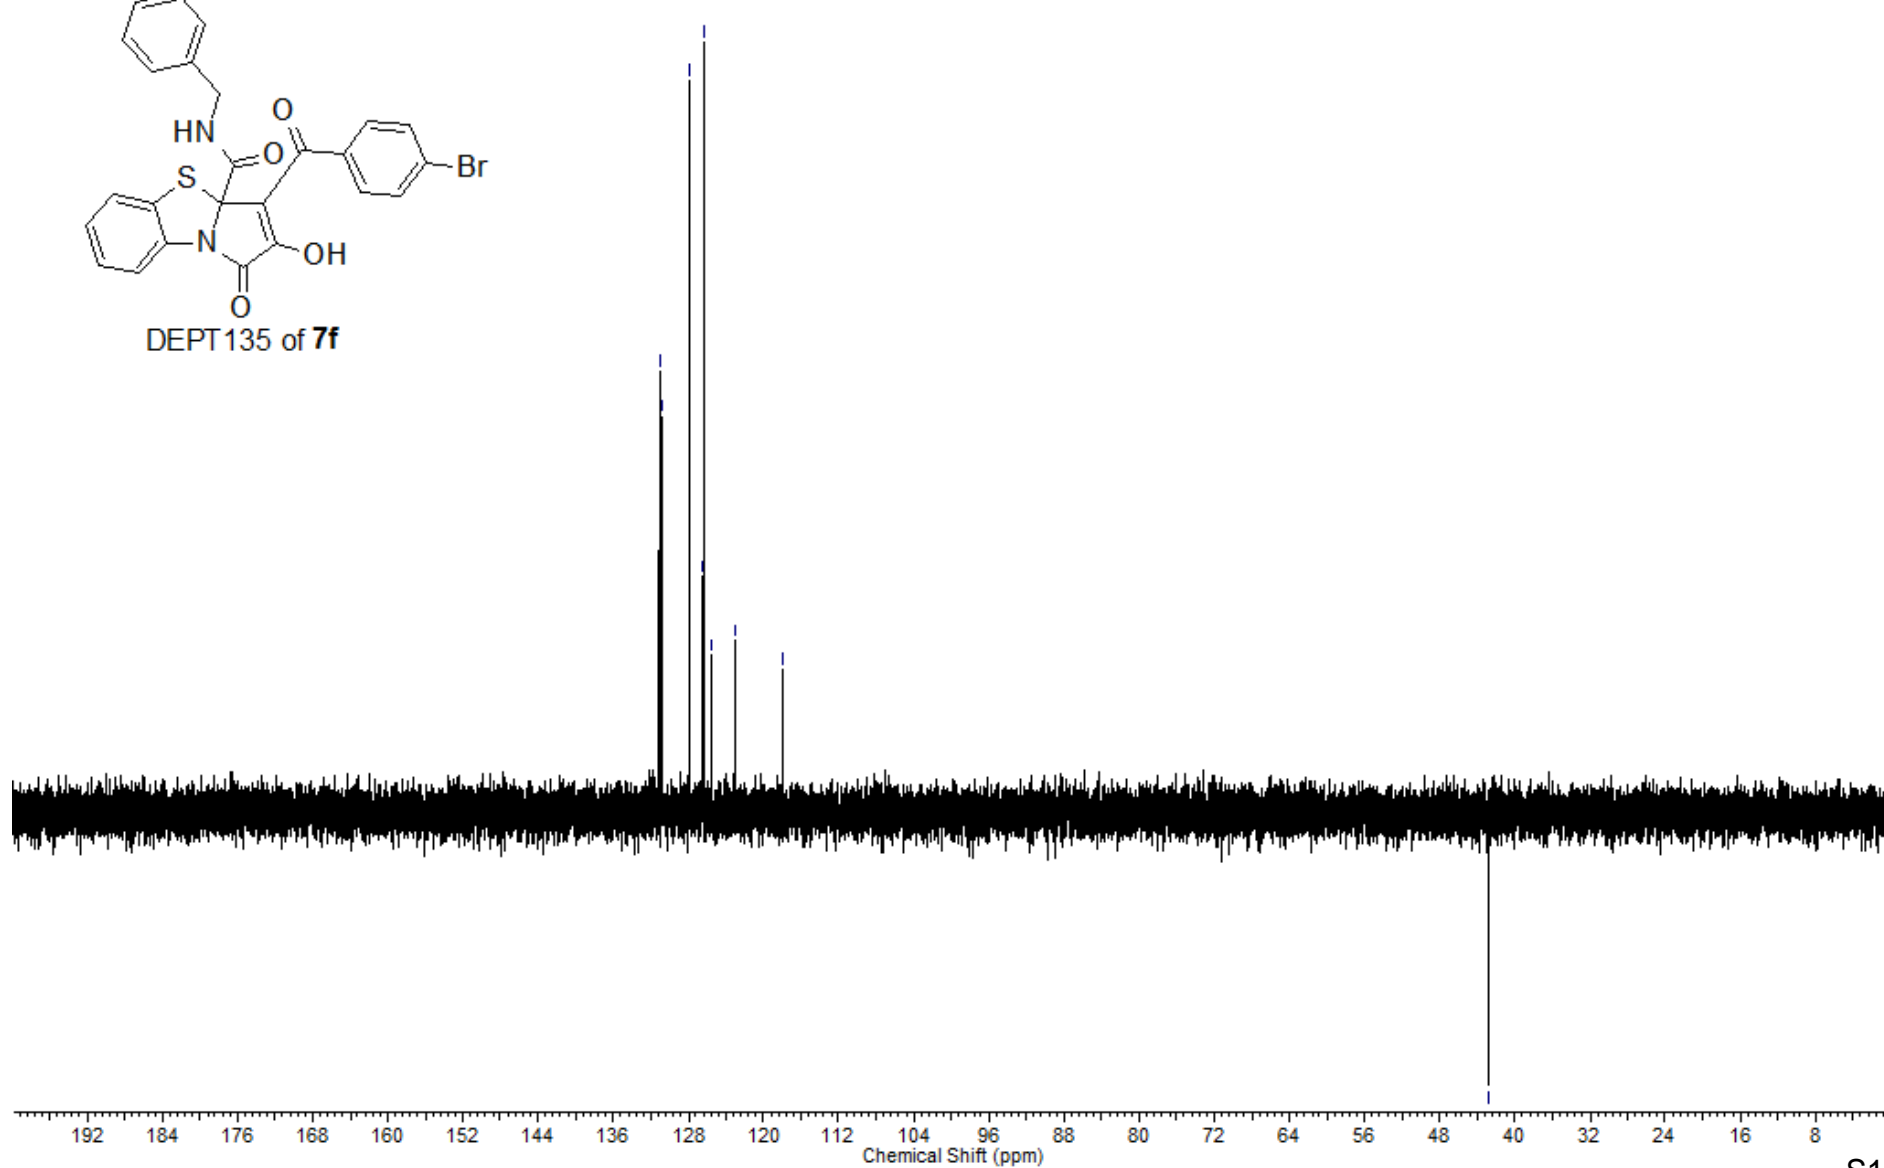



MAN7863.001.esp

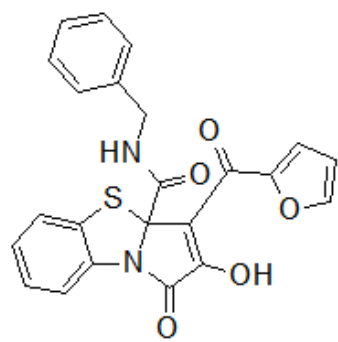

<sup>1</sup>H NMR of 7g

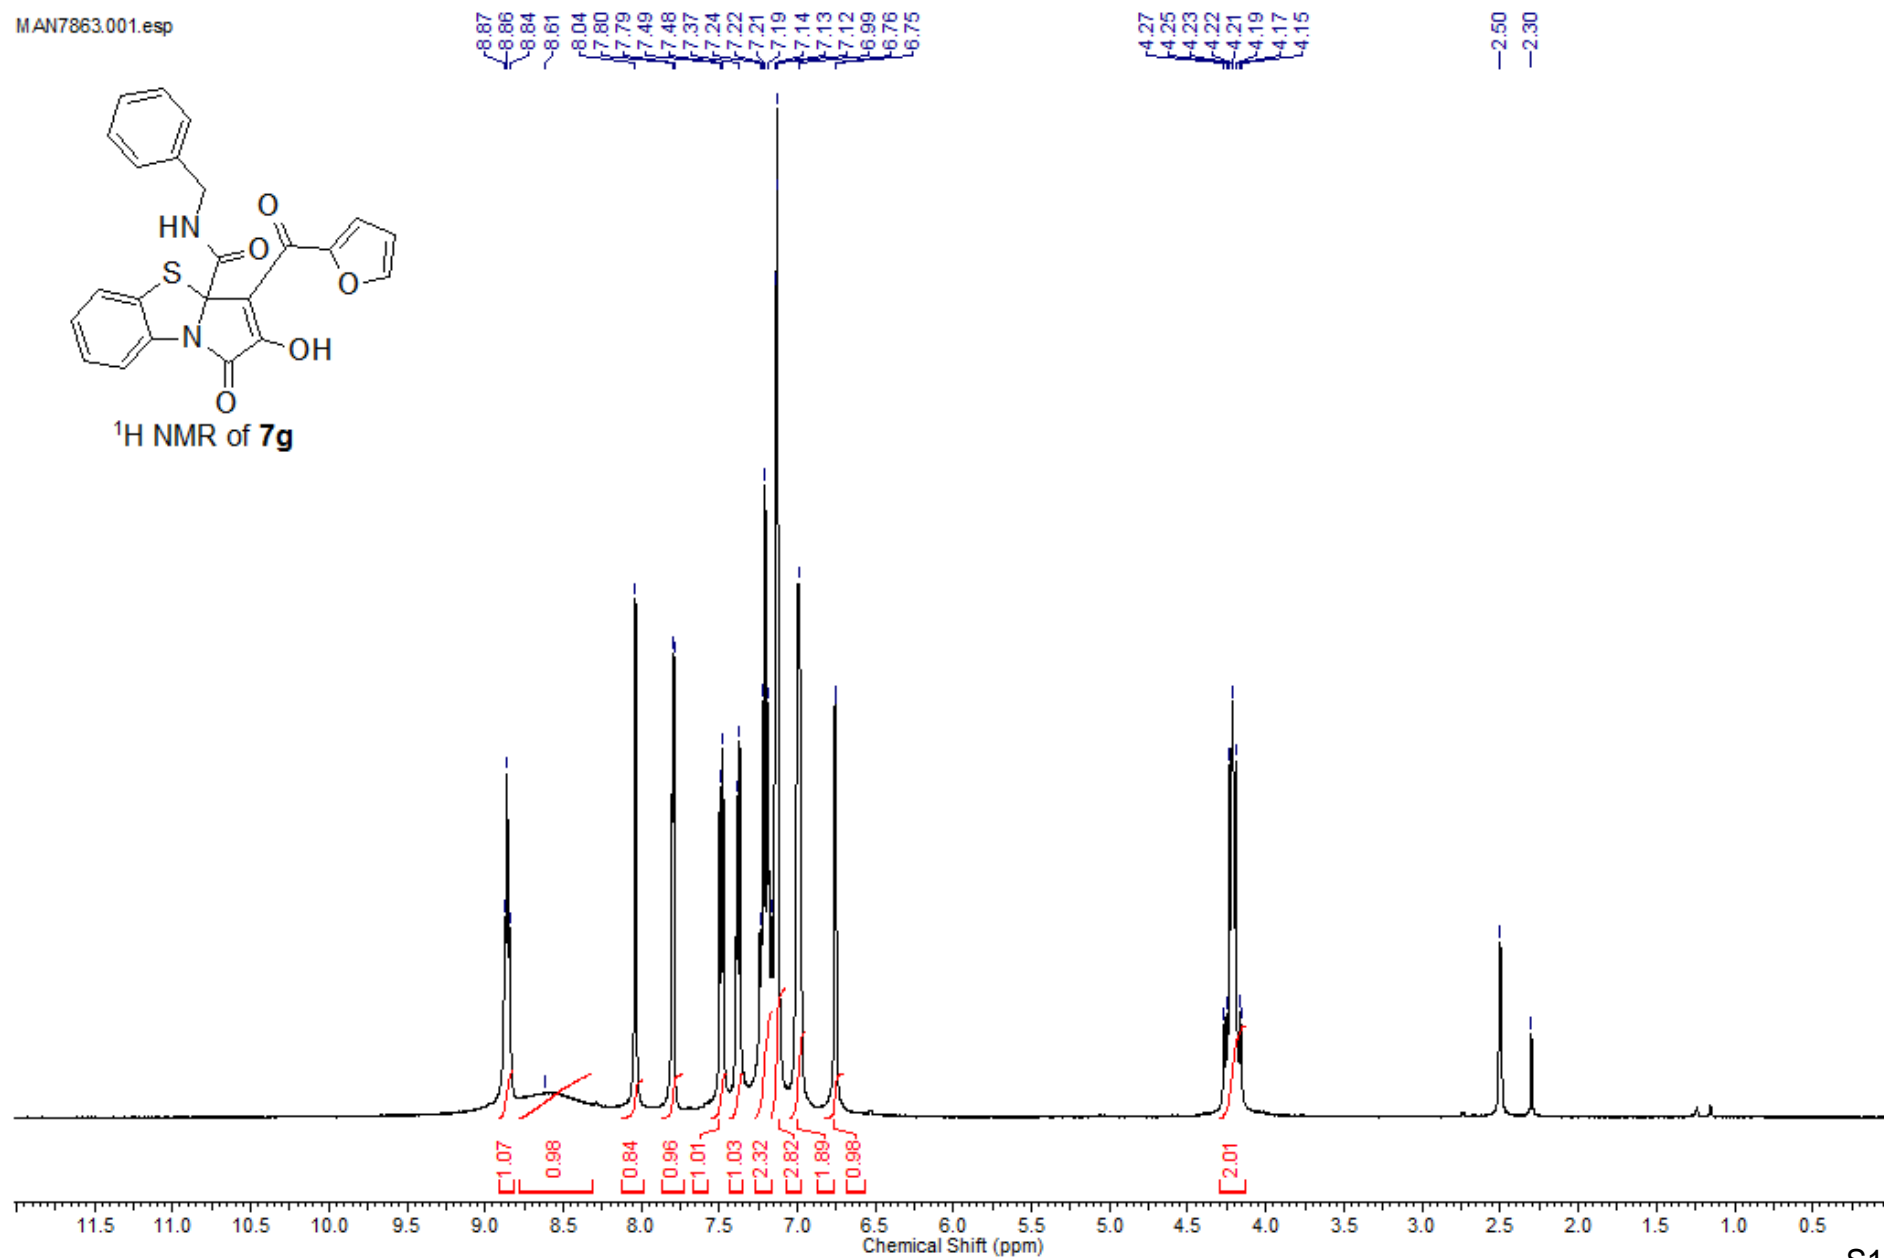

MAN7863.002.esp

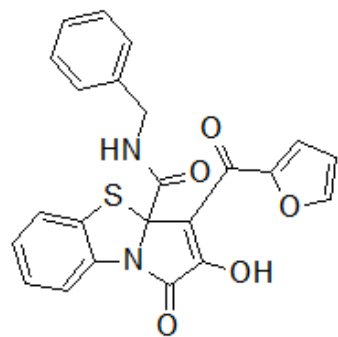

<sup>13</sup>C NMR of **7g**

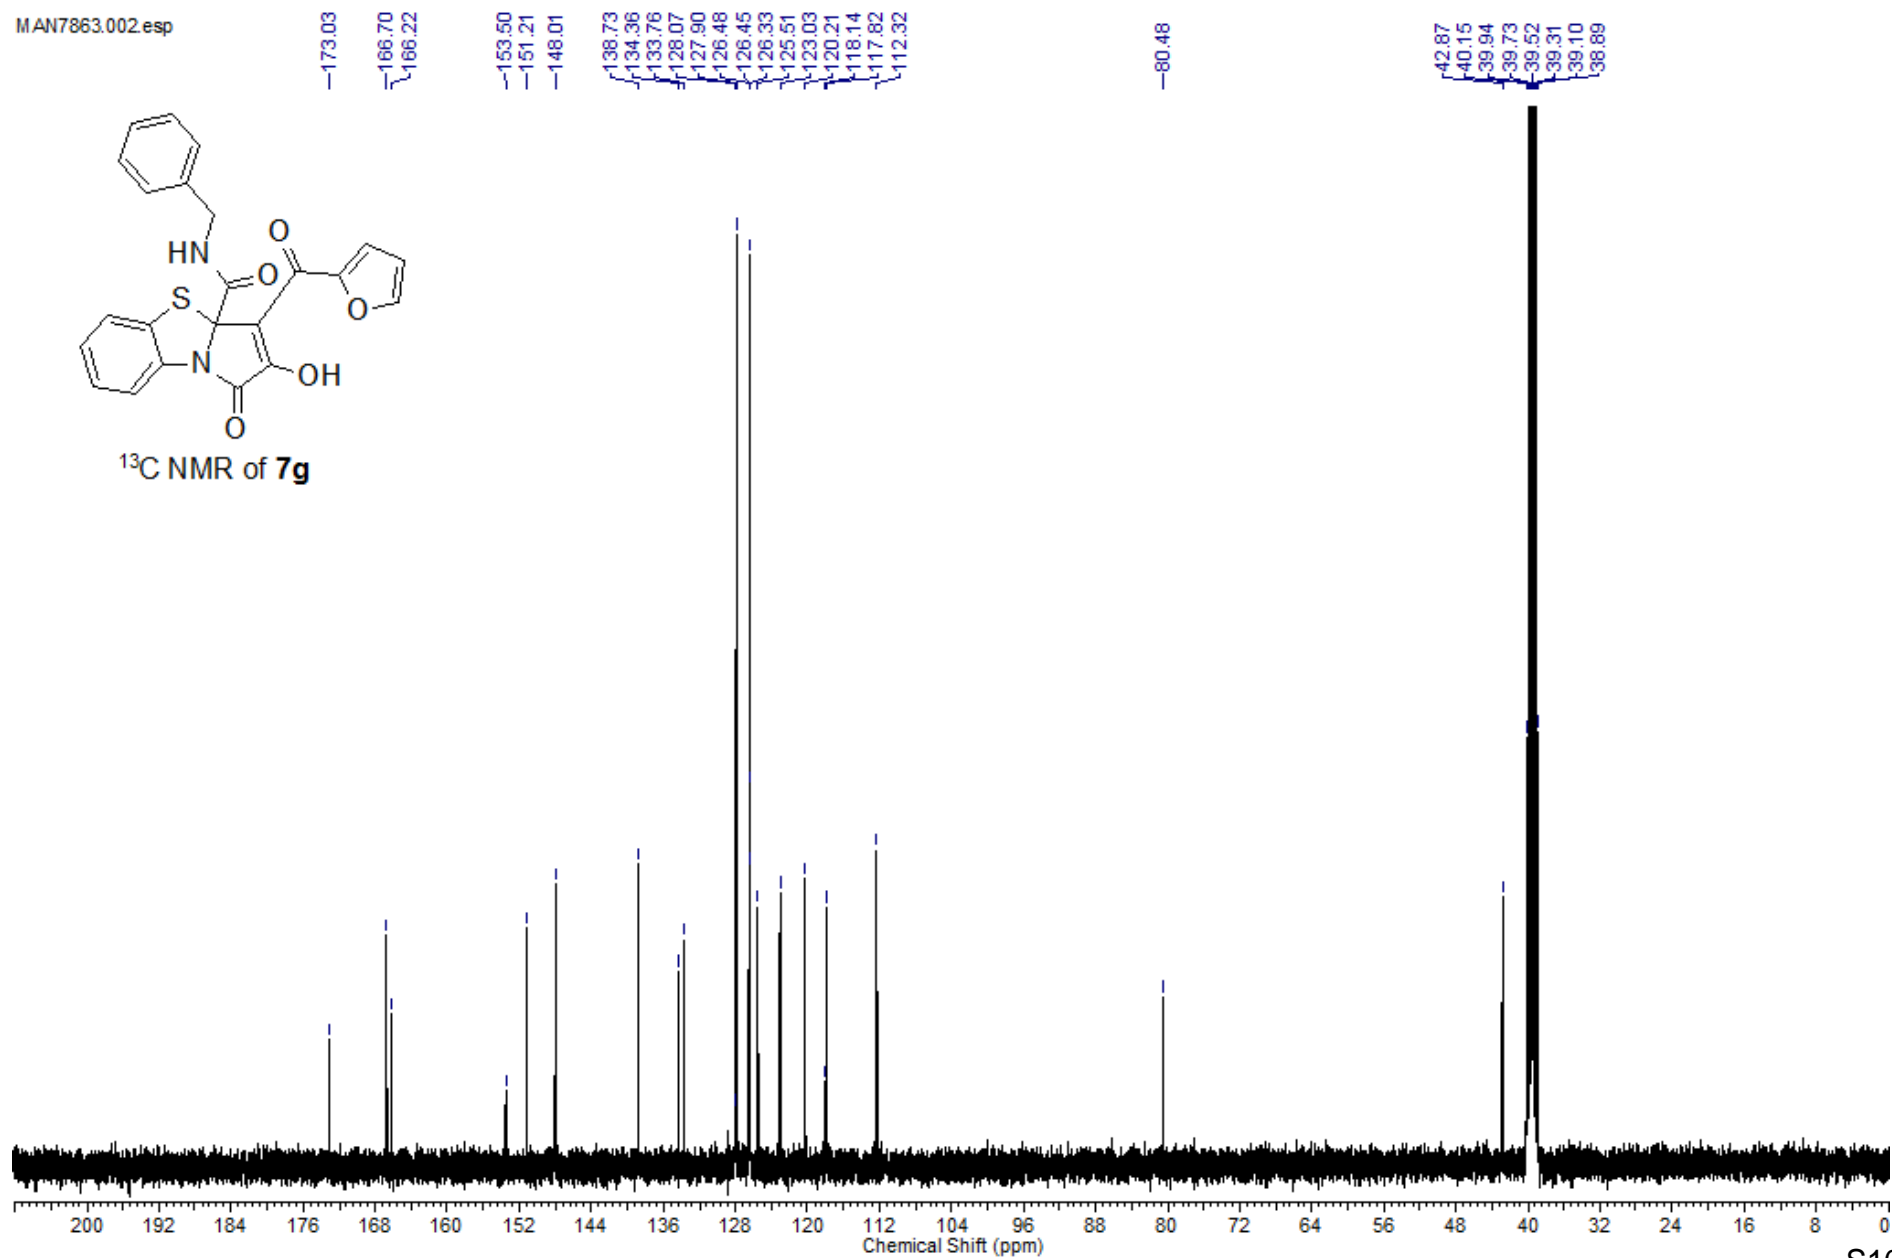

MAN7863.003.esp

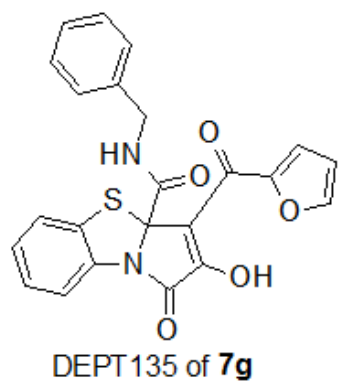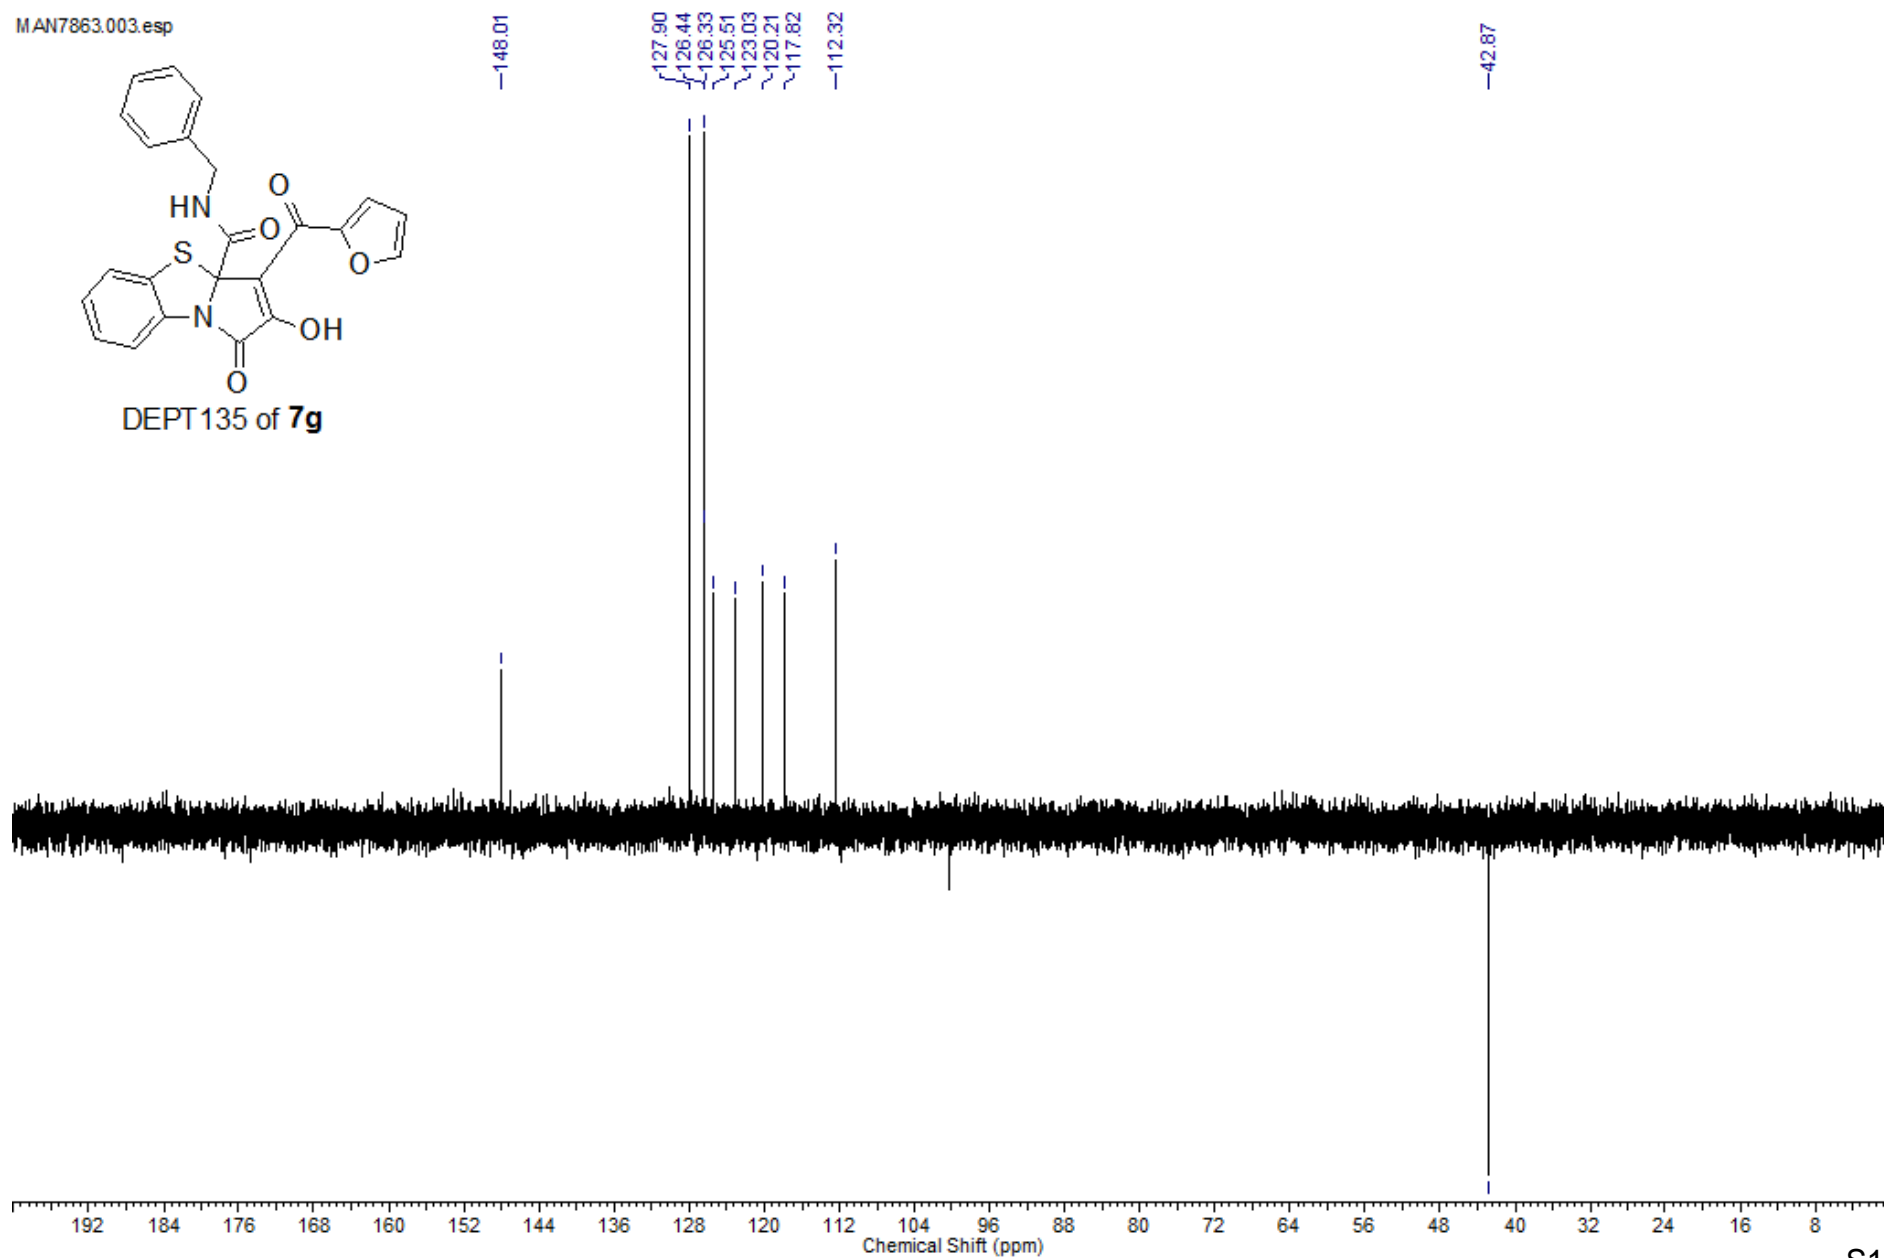

MAN7846.001.esp

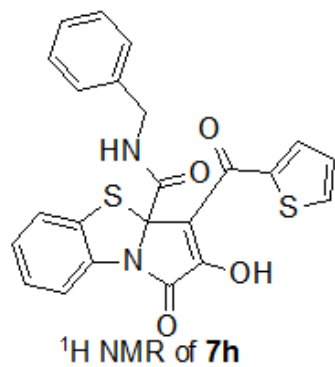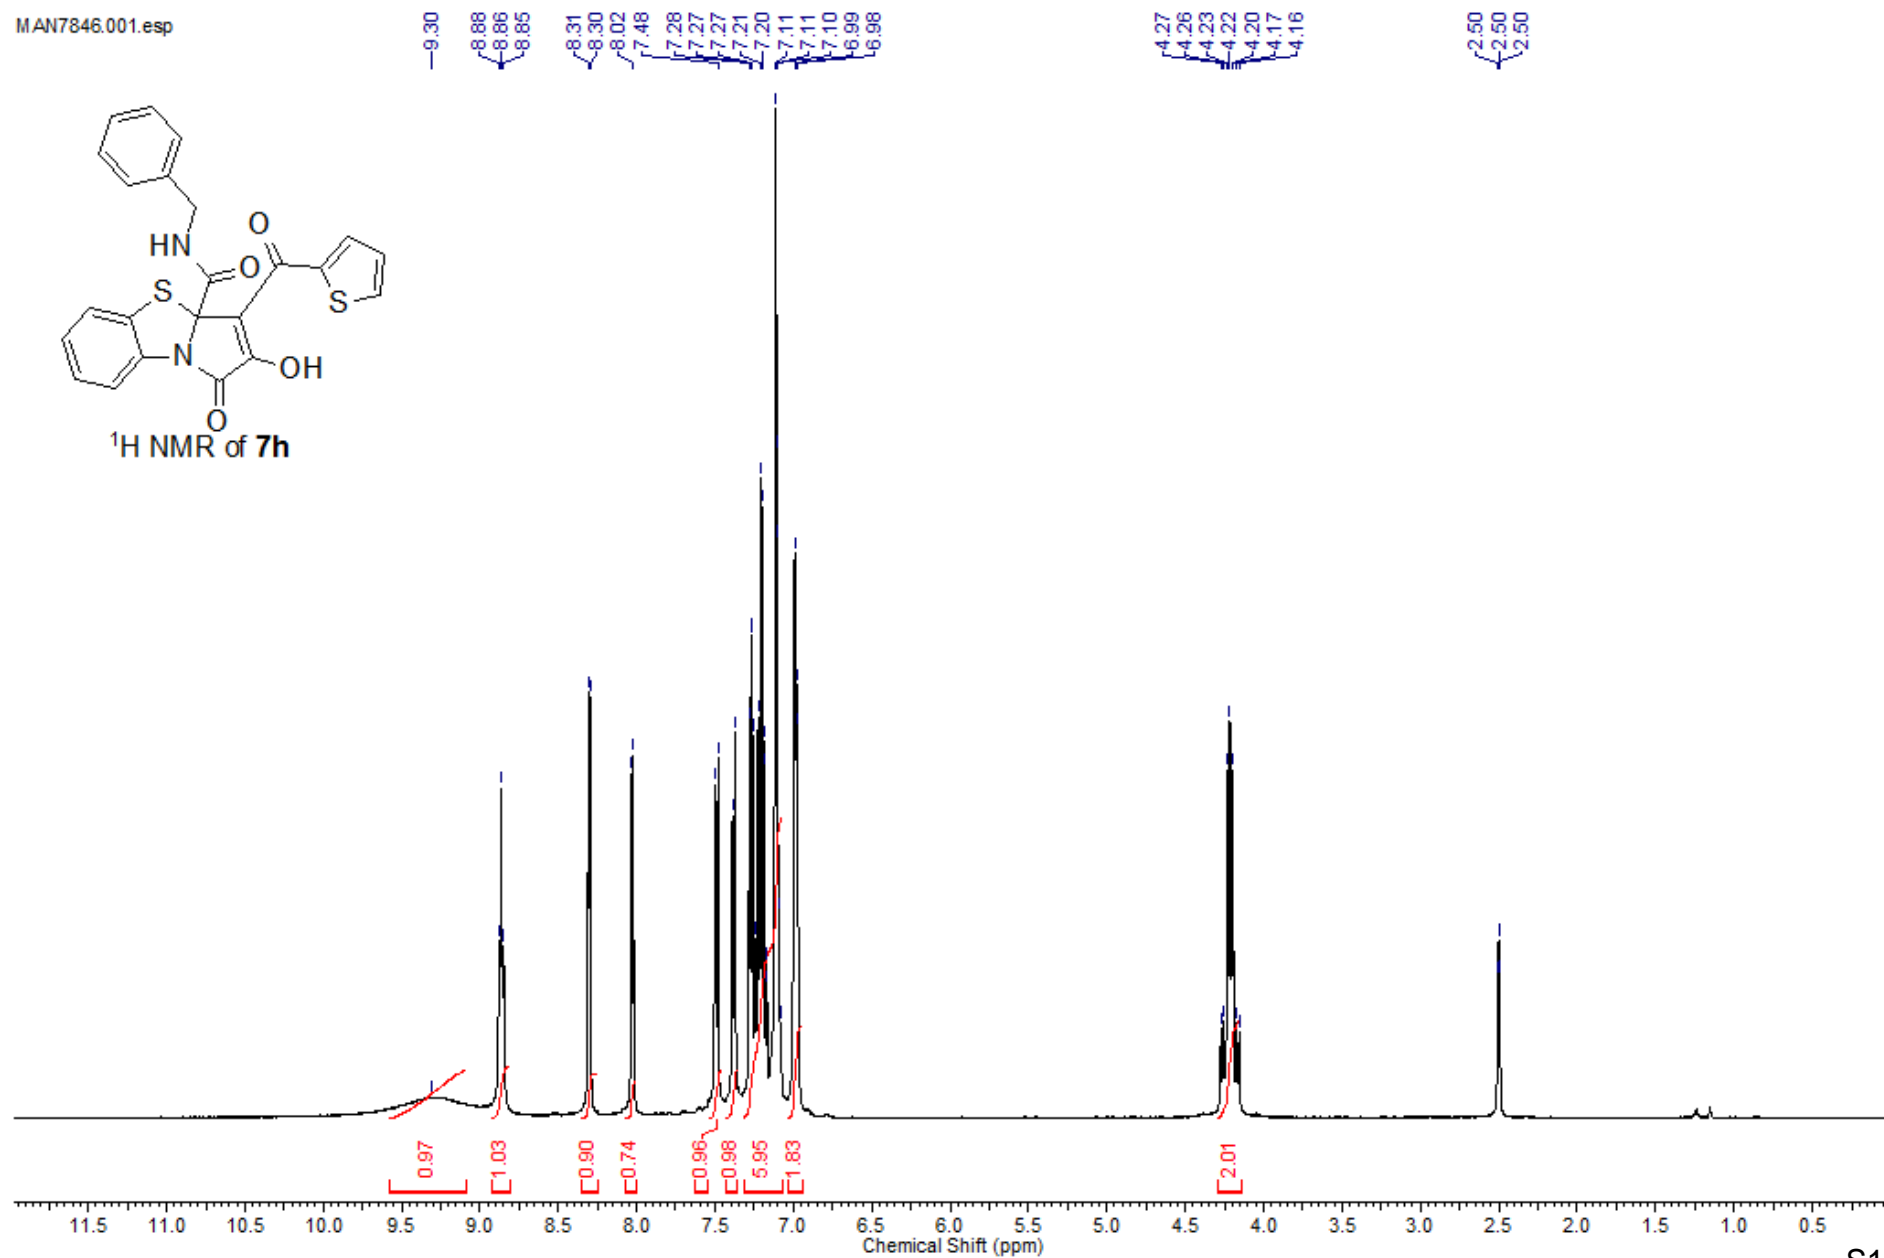

MAN7846.002.esp

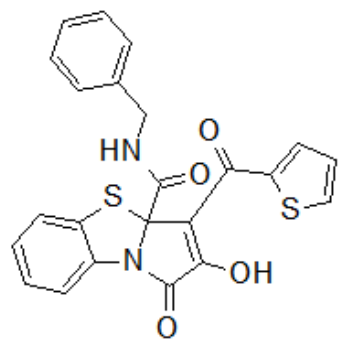

<sup>13</sup>C NMR of 7h

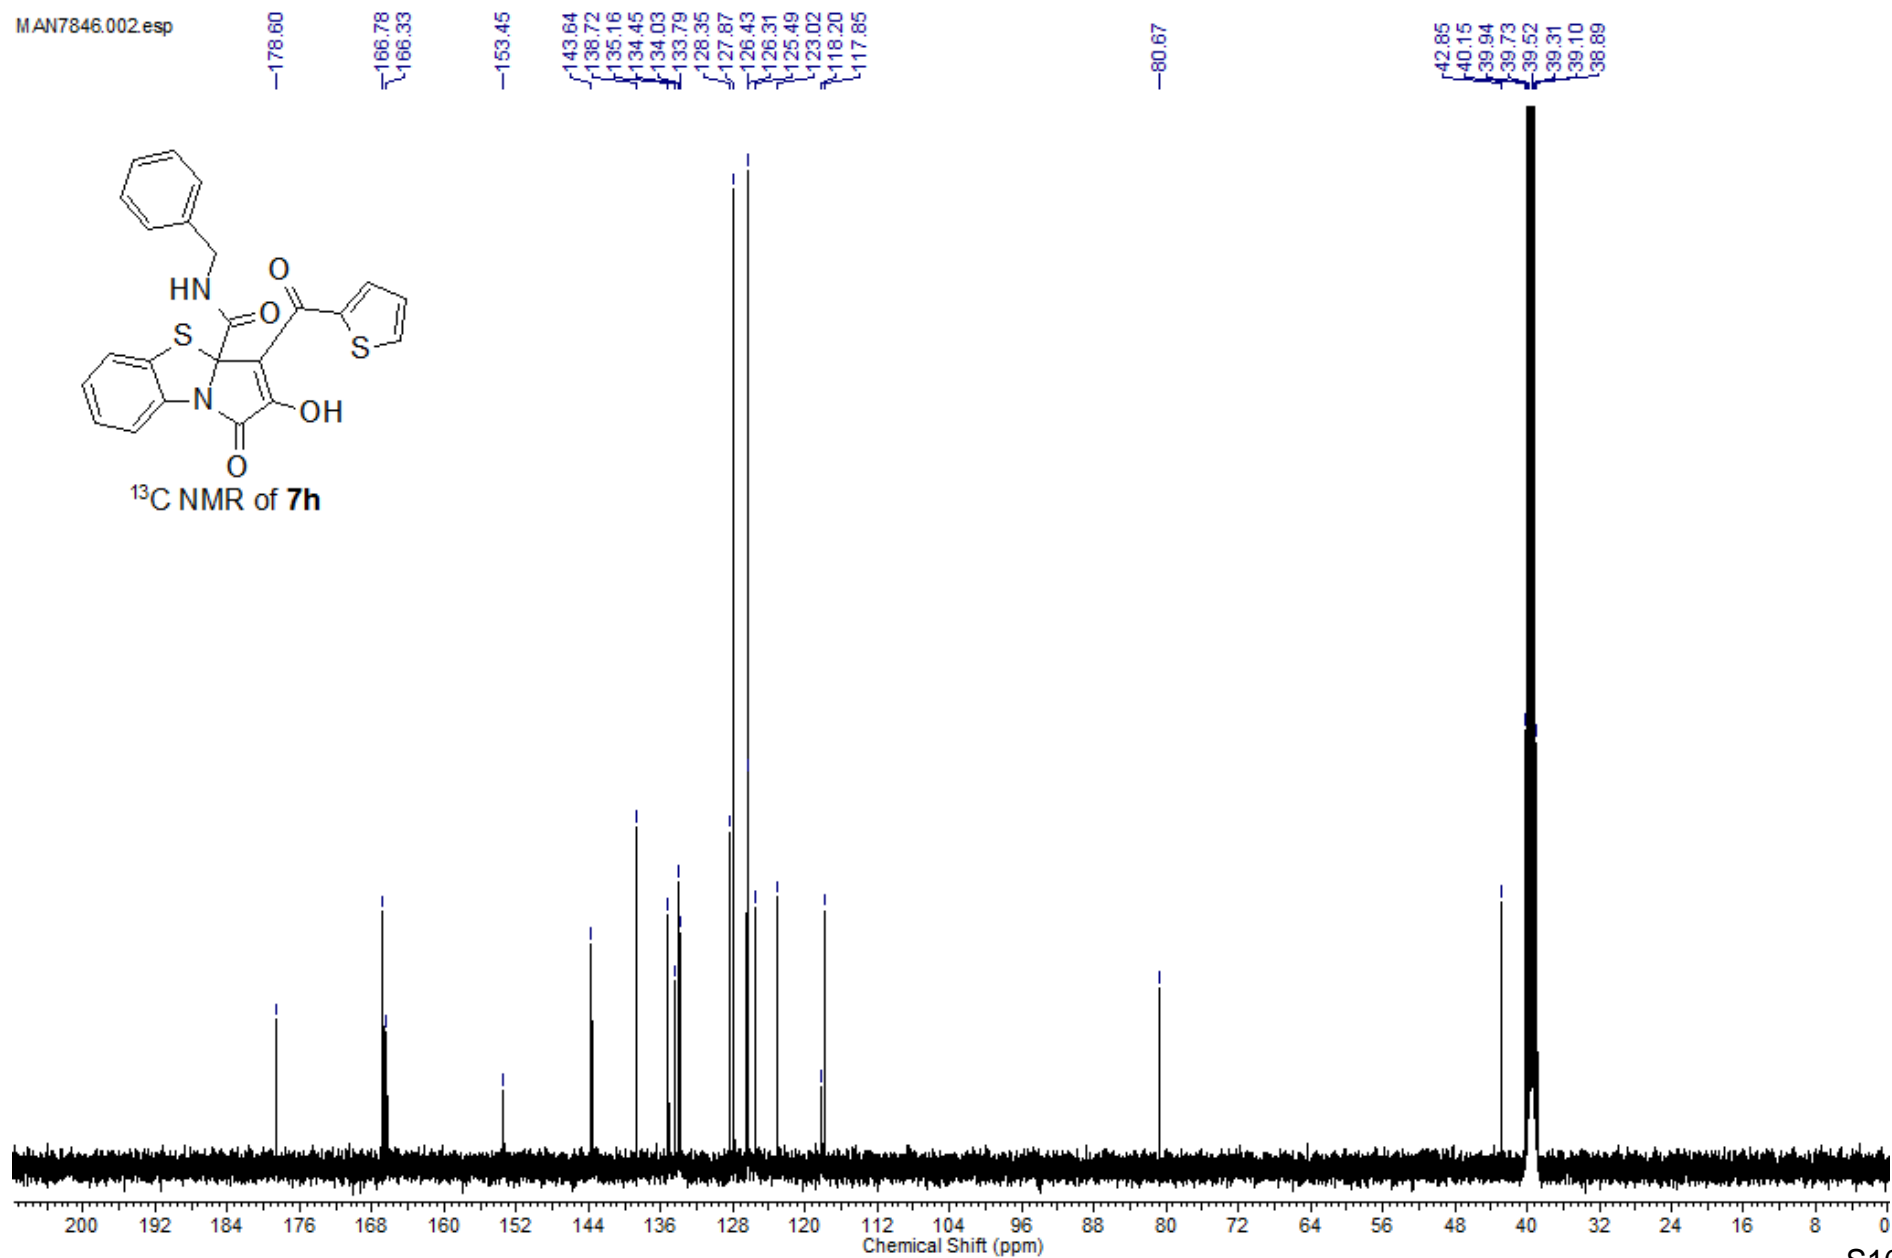

MAN7846.003.esp

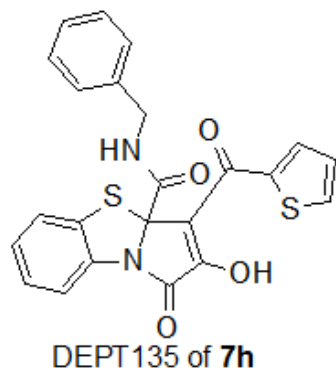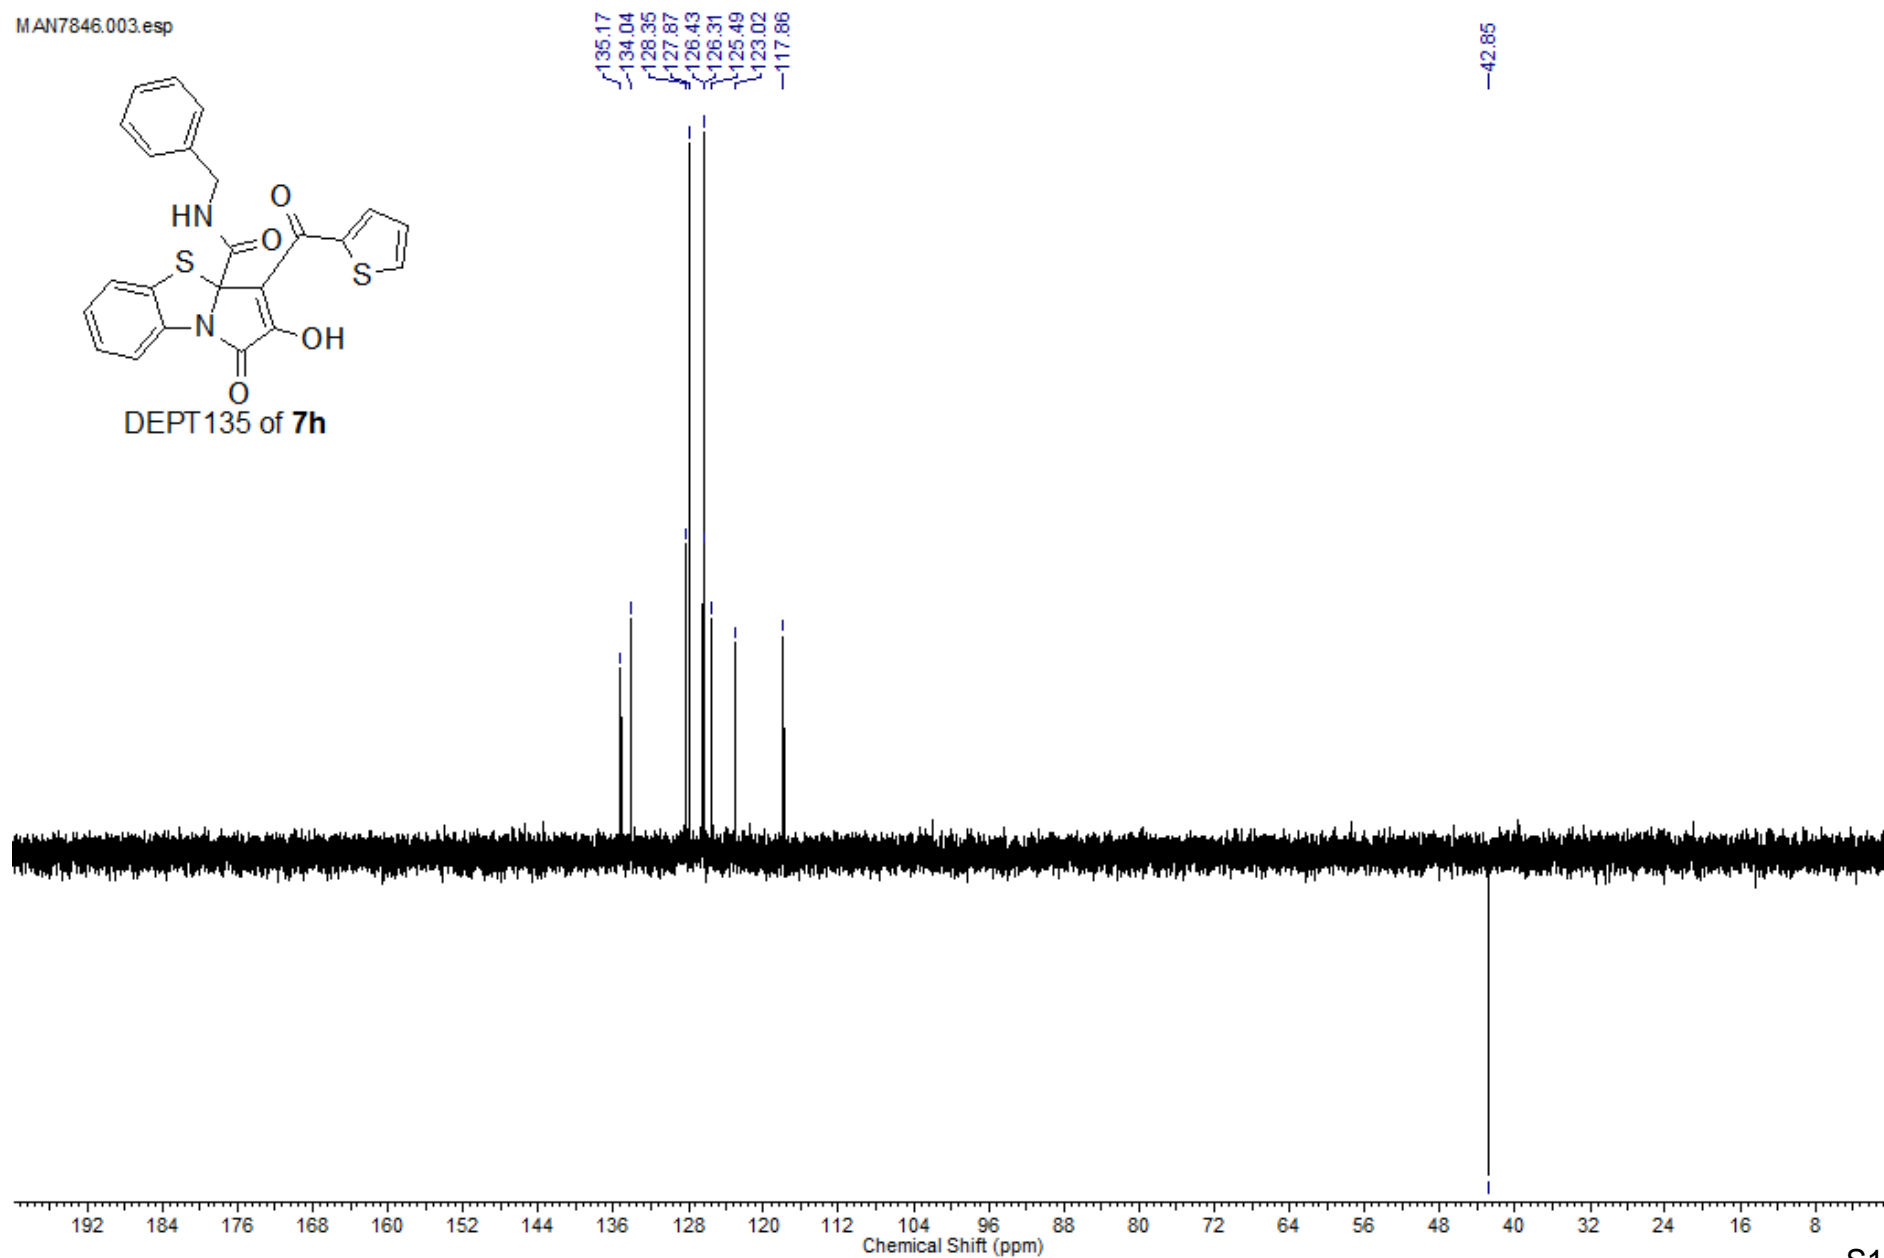

**1-(Morpholin-4-yl)-3-(2-oxo-2H-1,4-benzothiazin-3(4H)-ylidene)-4-phenylbutane-1,2,4-trione (10a)**

A mixture of compound **1a** (150 mg, 0.45 mmol), morpholine (43  $\mu$ L, 0.49 mmol), and anhydrous toluene (3 mL) is stirred in a closed microreaction V-vial at 113  $^{\circ}$ C for 1.5 h. Then, the reaction mixture is cooled to room temperature, and hexane (5 mL) is added to it. The formed precipitate of compound **10a** is filtered off.

Orange solid; yield (127 mg, 67%); mp 151–153  $^{\circ}$ C (hexane, toluene).

$^1\text{H}$  NMR (400 MHz, DMSO- $d_6$ ):  $\delta$  = 14.15 (s, 1H), 7.83 (m, 2H), 7.62 (m, 1H), 7.51 (m, 3H), 7.43 (m, 2H), 7.34 (m, 1H), 3.66 (m, 2H), 3.54 (m, 2H), 3.44 (m, 2H), 3.35 (m, 2H) ppm.

$^{13}\text{C}$  NMR (100 MHz, DMSO- $d_6$ ):  $\delta$  = 193.4, 189.1, 181.2, 165.0, 144.2, 139.8, 132.5, 129.8, 129.3, 128.7 (2C), 128.7 (2C), 128.2, 125.8, 122.9, 120.8, 115.0, 66.3, 66.2, 46.5, 41.5 ppm.

IR (mineral oil): 3462, 1728, 1651, 1640  $\text{cm}^{-1}$ .

EA: Found: C, 62.83; H, 4.42; N, 6.71. Calc. for  $\text{C}_{22}\text{H}_{18}\text{N}_2\text{O}_5\text{S}$ : C, 62.55; H, 4.29; N, 6.63.

MAN7160.011.esp

-14.15

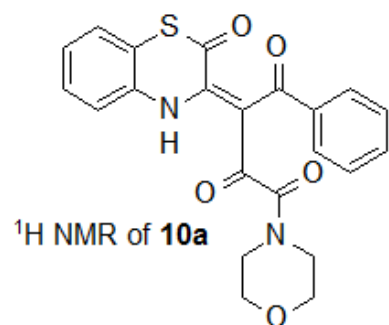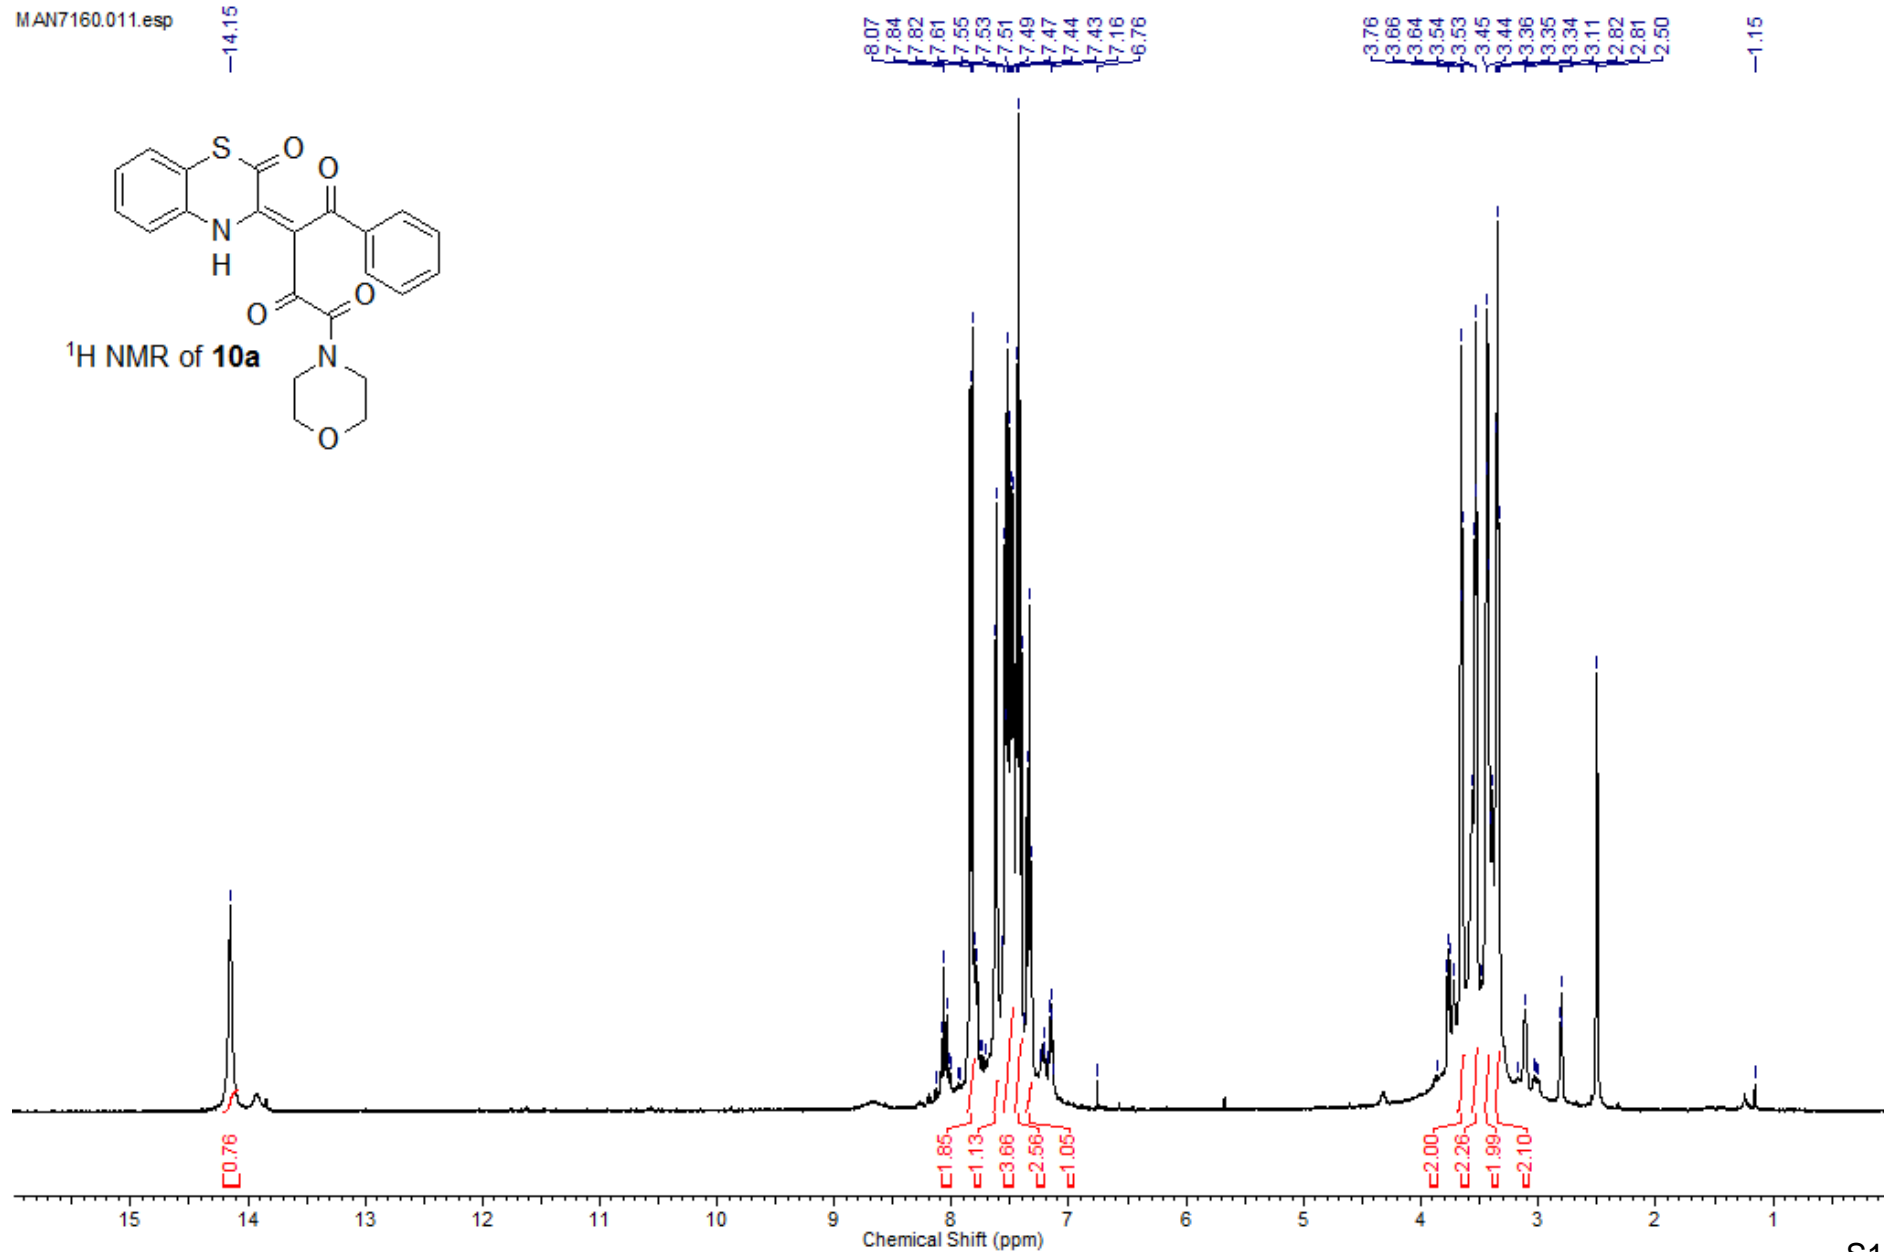





MAN7160.013.esp

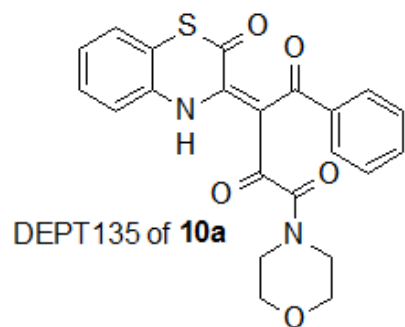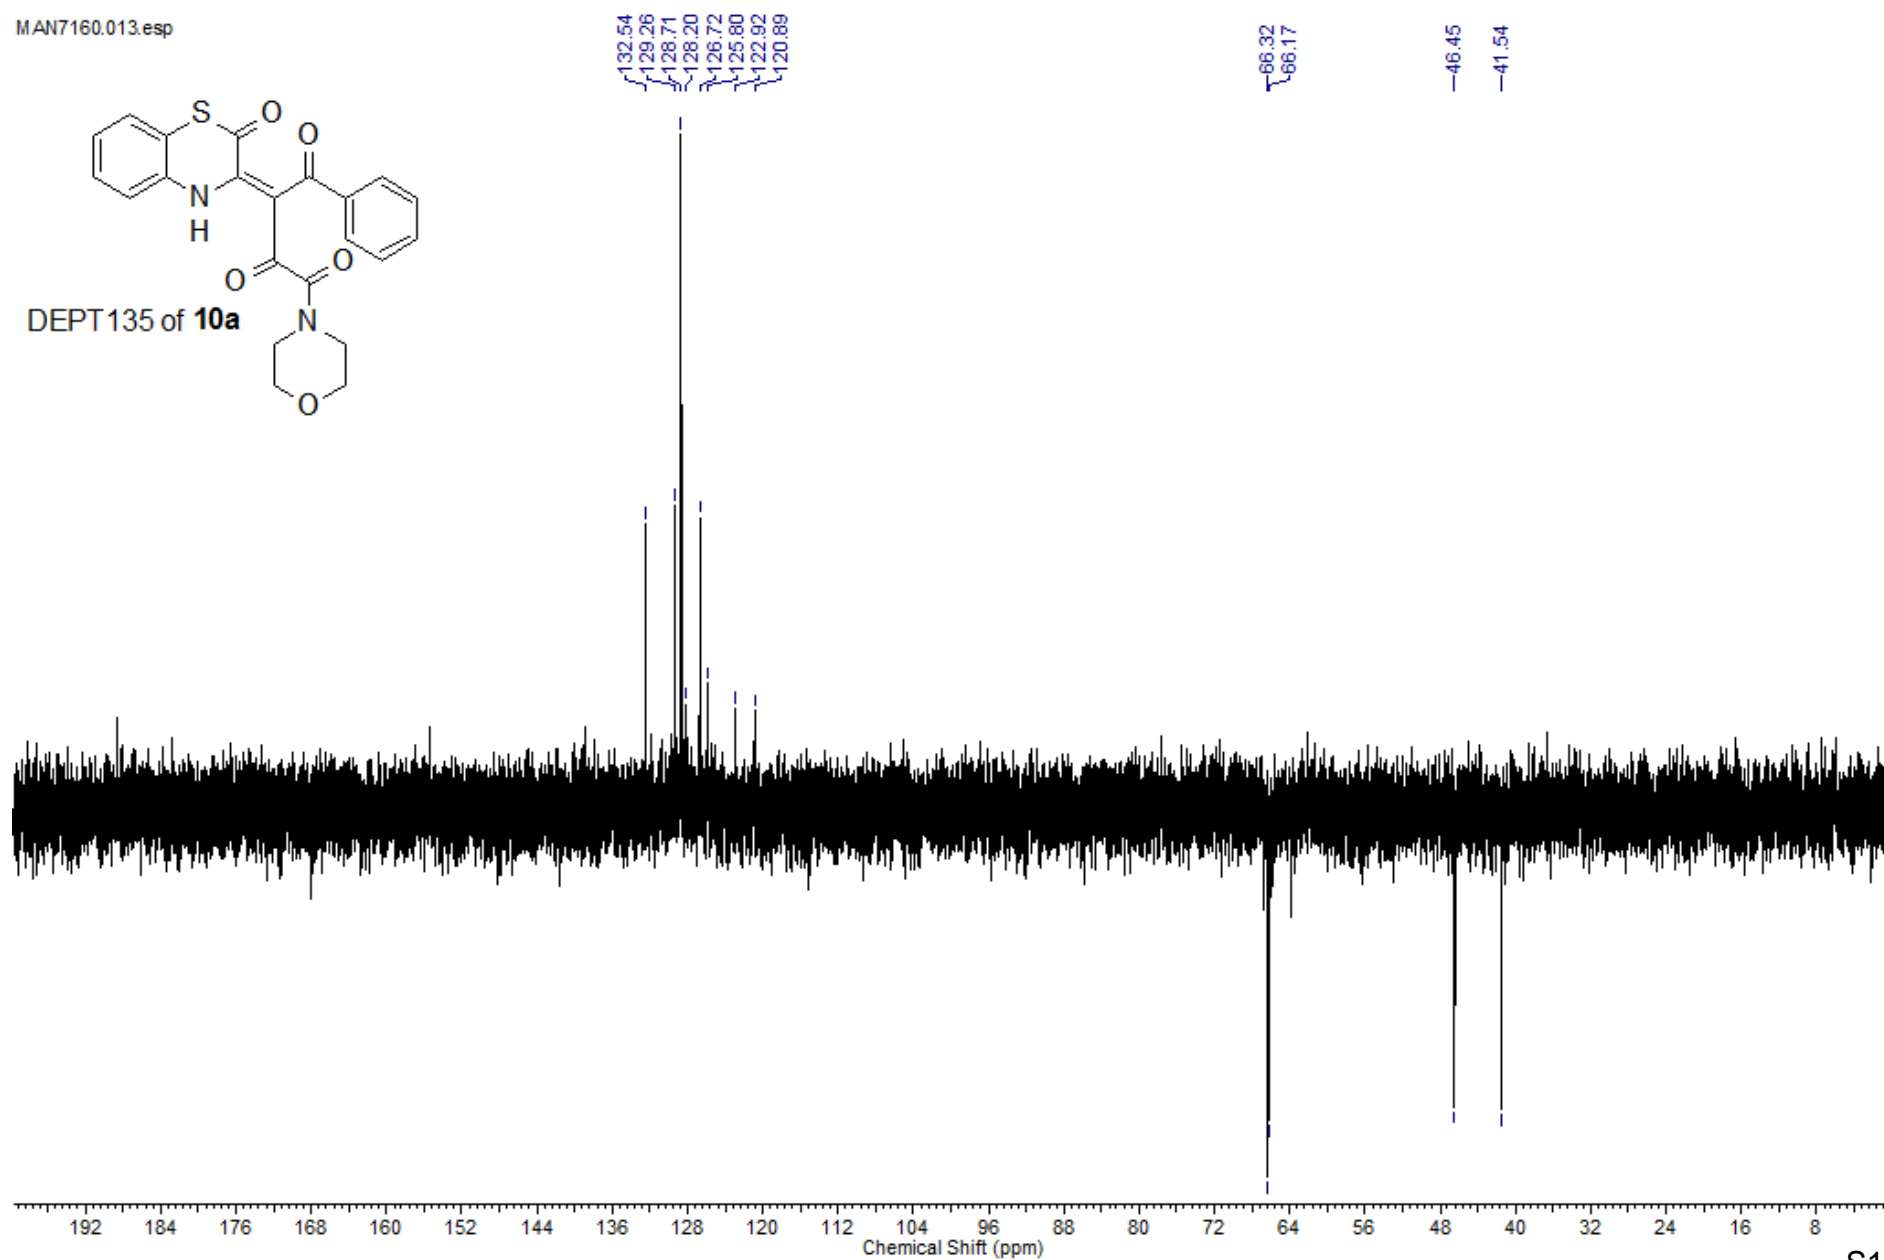

## ***N*-Aryl-3-aryl-2-hydroxy-1-oxopyrrolo[2,1-*b*][1,3]benzothiazole-3a(1*H*)-carboxamides 12. General procedure.**

A mixture of APBTT **1** (0.45 mmol), arylamine **11** (0.49 mmol for **11a,b** or 0.45 mmol for **11c,d**), and anhydrous toluene (3 mL) is stirred in a closed microreaction V-vial at 113 °C for 3 or 8 h (3 h for compounds **12ad,bd**). Then, the resulting solution is cooled to room temperature. In 24 h, the formed precipitate of compound **12** is filtered off and recrystallized from toluene (compound **12ca** is recrystallized from acetonitrile).

### **3-Benzoyl-2-hydroxy-1-oxo-*N*-phenylpyrrolo[2,1-*b*][1,3]benzothiazole-3a(1*H*)-carboxamide (12aa)**

Yellow solid; yield (77 mg, 40%); mp 196–198 °C (toluene).

<sup>1</sup>H NMR (400 MHz, DMSO-*d*<sub>6</sub>): δ = 10.18 (s, 1H), 9.90 (br.s, 1H), 7.82 (m, 2H), 7.59 (m, 1H), 7.53 (m, 1H), 7.49 (m, 4H), 7.40 (m, 1H), 7.27 (m, 2H), 7.21 (m, 2H), 7.05 (m, 1H) ppm.

<sup>13</sup>C NMR (100 MHz, DMSO-*d*<sub>6</sub>): δ = 188.0, 166.8, 165.3, 155.7, 138.0, 137.5, 134.4, 133.9, 132.5, 128.8 (2C), 128.5 (2C), 128.0 (2C), 126.6, 125.5, 124.1, 123.0, 120.3 (2C), 118.2, 117.0, 81.7 ppm.

IR (mineral oil): 3200, 3080, 1727, 1678 cm<sup>-1</sup>.

EA: Found: C, 67.41; H, 3.81 N, 6.60. Calc. for C<sub>24</sub>H<sub>16</sub>N<sub>2</sub>O<sub>4</sub>S: C, 67.28; H, 3.76; N, 6.54.

### **2-Hydroxy-3-(4-methoxybenzoyl)-1-oxo-*N*-phenylpyrrolo[2,1-*b*][1,3]benzothiazole-3a(1*H*)-carboxamide (12ca)**

Yellow solid; yield (66 mg, 34%); mp 215–217 °C (acetonitrile).

<sup>1</sup>H NMR (400 MHz, DMSO-*d*<sub>6</sub>): δ = 10.15 (s, 1H), 7.87 (m, 2H), 7.53 (m, 1H), 7.46 (m, 2H), 7.39 (m, 1H), 7.27–7.17 (m, 4H), 7.04 (m, 3H), 3.84 (s, 3H) ppm.

<sup>13</sup>C NMR (100 MHz, DMSO-*d*<sub>6</sub>): δ = 186.8, 167.3, 165.2, 163.4, 152.9, 138.0, 135.2, 133.8, 131.6 (2C), 129.8, 128.6 (2C), 126.8, 125.6, 124.3, 123.1, 120.5 (2C), 118.5, 118.2, 113.7 (2C), 82.2, 55.6 ppm.

IR (mineral oil): 3342, 3215, 1720, 1691, 1659 cm<sup>-1</sup>.

EA: Found: C, 65.59; H, 4.00 N, 6.15. Calc. for C<sub>25</sub>H<sub>18</sub>N<sub>2</sub>O<sub>5</sub>S: C, 65.49; H, 3.96; N, 6.11.

### **3-Benzoyl-2-hydroxy-*N*-mesityl-1-oxopyrrolo[2,1-*b*][1,3]benzothiazole-3a(1*H*)-carboxamide (12ab)**

Yellow solid; yield (83 mg, 39%); mp 227–229 °C (toluene).

<sup>1</sup>H NMR (400 MHz, DMSO-*d*<sub>6</sub>): δ = 9.64 (s, 1H), 7.85 (m, 2H), 7.63 (m, 1H), 7.52 (m, 3H), 7.42 (m, 1H), 7.26–7.19 (m, 2H), 6.78 (m, 2H), 5.39 (br.s, 1H), 2.16 (s, 3H), 1.79 (s, 6H) ppm.

<sup>13</sup>C NMR (100 MHz, DMSO-*d*<sub>6</sub>): δ = 188.1, 166.2, 165.0, 153.9, 137.2, 135.7, 134.9, 134.8 (2C), 133.7, 132.7, 131.7, 128.8 (2C), 128.1 (2C), 128.1 (2C), 126.6, 125.5, 123.1, 118.4, 118.1, 81.3, 20.3, 17.2 (2C) ppm.

IR (mineral oil): 3325, 3181, 1731, 1666, 1645 cm<sup>-1</sup>.

EA: Found: C, 69.04; H, 4.88; N, 6.00. Calc. for C<sub>27</sub>H<sub>22</sub>N<sub>2</sub>O<sub>4</sub>S: C, 68.92; H, 4.71; N, 5.95.

**2-Hydroxy-*N*-mesityl-3-(4-methylbenzoyl)-1-oxopyrrolo[2,1-*b*][1,3]benzothiazole-3a(1*H*)-carboxamide (12bb)**

Yellow solid; yield (70 mg, 32%); mp 201–203 °C (toluene).

<sup>1</sup>H NMR (400 MHz, DMSO-*d*<sub>6</sub>): δ = 9.61 (s, 1H), 7.77 (m, 2H), 7.53 (m, 1H), 7.42 (m, 1H), 7.33 (m, 2H), 7.26–7.19 (m, 2H), 6.77 (m, 2H), 5.92 (br.s, 1H), 2.40 (s, 3H), 2.16 (s, 3H), 1.78 (s, 6H) ppm.

<sup>13</sup>C NMR (100 MHz, DMSO-*d*<sub>6</sub>): δ = 187.7, 166.3, 165.0, 153.2, 143.2, 135.7, 135.0, 134.8 (2C), 134.6, 133.7, 131.7, 129.1 (2C), 128.6 (2C), 128.1 (2C), 126.6, 125.5, 123.1, 118.6, 118.1, 81.3, 21.1, 20.3, 17.2 (2C) ppm.

IR (mineral oil): 3331, 3181, 1728, 1665, 1645 cm<sup>-1</sup>.

EA: Found: C, 69.51; H, 5.07; N, 5.83. Calc. for C<sub>28</sub>H<sub>24</sub>N<sub>2</sub>O<sub>4</sub>S: C, 69.40; H, 4.99; N, 5.78.

**2-Hydroxy-*N*-mesityl-3-(4-methoxybenzoyl)-1-oxopyrrolo[2,1-*b*][1,3]benzothiazole-3a(1*H*)-carboxamide (12cb)**

Yellow solid; yield (81 mg, 36%); mp 203–205 °C (toluene).

<sup>1</sup>H NMR (400 MHz, DMSO-*d*<sub>6</sub>): δ = 9.59 (s, 1H), 7.88 (m, 2H), 7.52 (m, 1H), 7.41 (m, 1H), 7.22 (m, 2H), 7.05 (m, 2H), 6.76 (m, 2H), 3.87 (s, 3H), 2.16 (s, 3H), 1.76 (s, 6H) ppm.

<sup>13</sup>C NMR (100 MHz, DMSO-*d*<sub>6</sub>): δ = 186.7, 166.6, 165.0, 163.3, 151.8, 135.8, 135.5, 134.9 (2C), 133.7, 131.8, 131.6 (2C), 129.7, 128.2 (2C), 126.7, 125.6, 123.2, 119.1, 118.3, 113.6 (2C), 81.5, 55.6, 20.4, 17.3 (2C) ppm.

IR (mineral oil): 3323, 3169, 1725, 1665, 1641 cm<sup>-1</sup>.

EA: Found: C, 67.25; H, 4.93; N, 5.72. Calc. for C<sub>28</sub>H<sub>24</sub>N<sub>2</sub>O<sub>5</sub>S: C, 67.19; H, 4.83; N, 5.60.

**3-(4-Fluorobenzoyl)-2-Hydroxy-*N*-mesityl-1-oxopyrrolo[2,1-*b*][1,3]benzothiazole-3a(1*H*)-carboxamide (12db)**

Yellow solid; yield (92 mg, 42%); mp 229–231 °C (toluene).

<sup>1</sup>H NMR (400 MHz, DMSO-*d*<sub>6</sub>): δ = 9.63 (s, 1H), 7.95 (m, 2H), 7.52 (m, 1H), 7.42 (m, 1H), 7.35 (m, 2H), 7.26–7.19 (m, 2H), 6.78 (m, 2H), 2.16 (s, 3H), 1.79 (s, 6H) ppm.

<sup>13</sup>C NMR (100 MHz, DMSO-*d*<sub>6</sub>): δ = 186.5, 166.2, 165.9, 163.5, 165.1, 154.4, 135.7, 134.9, 134.8 (2C), 133.9, 133.7, 133.9, 131.8, 131.7 (2C), 128.1 (2C), 126.6, 125.5, 123.1, 118.1, 118.0, 115.2, 115.0, 81.3, 20.3, 17.2 (2C) ppm.

IR (mineral oil): 3332, 3195, 1728, 1666, 1647 cm<sup>-1</sup>.

EA: Found: C, 66.47; H, 4.39; N, 5.78. Calc. for C<sub>27</sub>H<sub>21</sub>FN<sub>2</sub>O<sub>4</sub>S: C, 66.38; H, 4.33; N, 5.73.

**3-(4-Chlorobenzoyl)-2-Hydroxy-*N*-mesityl-1-oxopyrrolo[2,1-*b*][1,3]benzothiazole-3a(1*H*)-carboxamide (12eb)**

Yellow solid; yield (99 mg, 44%); mp 184–186 °C (toluene).

<sup>1</sup>H NMR (400 MHz, DMSO-*d*<sub>6</sub>): δ = 9.65 (s, 1H), 7.85 (m, 2H), 7.58 (m, 2H), 7.52 (m, 1H), 7.41 (m, 1H), 7.22 (m, 2H), 6.78 (m, 2H), 5.90 (br.s, 1H), 2.16 (s, 3H), 1.80 (s, 6H) ppm.

<sup>13</sup>C NMR (100 MHz, DMSO-*d*<sub>6</sub>): δ = 186.5, 166.2, 165.3, 156.0, 137.2, 136.3, 135.7, 134.8 (2C), 134.6, 133.8, 131.7, 130.6 (2C), 128.1 (2C), 128.1 (2C), 126.6, 125.5, 123.0, 117.9, 81.2, 20.3, 17.2 (2C) ppm.

IR (mineral oil): 3255, 3065, 1744, 1683, 1646 cm<sup>-1</sup>.

EA: Found: C, 64.35; H, 4.21; N, 5.60. Calc. for C<sub>27</sub>H<sub>21</sub>CIN<sub>2</sub>O<sub>4</sub>S: C, 64.22; H, 4.19; N, 5.55.

### **3-(4-Bromobenzoyl)-2-Hydroxy-*N*-mesityl-1-oxopyrrolo[2,1-*b*][1,3]benzothiazole-3a(1*H*)-carboxamide (12fb)**

Yellow solid; yield (101 mg, 41%); mp 156–158 °C (toluene).

<sup>1</sup>H NMR (400 MHz, DMSO-*d*<sub>6</sub>): δ = 9.67 (s, 1H), 7.76 (m, 2H), 7.70 (m, 2H), 7.51 (m, 1H), 7.40 (m, 1H), 7.24–7.17 (m, 2H), 6.78 (m, 2H), 5.80 (br.s, 1H), 2.17 (s, 3H), 1.82 (s, 6H) ppm.

<sup>13</sup>C NMR (100 MHz, DMSO-*d*<sub>6</sub>): δ = 187.0, 166.3, 165.2, 155.6, 136.6, 135.8, 134.9 (2C), 133.8, 131.8, 131.2 (2C), 130.9 (2C), 128.2 (2C), 126.8, 126.6, 125.6, 123.2, 118.1, 117.5, 81.3, 20.4, 17.3 (2C) ppm.

IR (mineral oil): 3251, 3083, 1744, 1683, 1645 cm<sup>-1</sup>.

EA: Found: C, 59.15; H, 3.70; N, 5.14. Calc. for C<sub>27</sub>H<sub>21</sub>BrN<sub>2</sub>O<sub>4</sub>S: C, 59.02; H, 3.85; N, 5.10.

### **3-(4-Furan-2-carbonyl)-2-Hydroxy-*N*-mesityl-1-oxopyrrolo[2,1-*b*][1,3]benzothiazole-3a(1*H*)-carboxamide (12gb)**

Greenish yellow solid; yield (66 mg, 32%); mp 184–186 °C (toluene).

<sup>1</sup>H NMR (400 MHz, DMSO-*d*<sub>6</sub>): δ = 9.66 (s, 1H), 8.01 (m, 1H), 7.95 (m, 1H), 7.50 (m, 1H), 7.39 (m, 1H), 7.24–7.16 (m, 2H), 6.97 (br.s, 1H), 6.77 (m, 2H), 6.75 (m, 1H), 2.16 (s, 3H), 1.80 (s, 6H) ppm.

<sup>13</sup>C NMR (100 MHz, DMSO-*d*<sub>6</sub>): δ = 173.1, 166.3, 165.3, 154.2, 151.3, 148.1, 135.7, 134.9 (2C), 134.7, 133.9, 131.8, 128.2 (2C), 126.6, 125.6, 123.2, 120.3, 118.0, 117.8, 112.4, 81.2, 20.4, 17.2 (2C) ppm.

IR (mineral oil): 3326, 3148, 1744, 1731, 1661 cm<sup>-1</sup>.

EA: Found: C, 65.33; H, 4.47; N, 6.16. Calc. for C<sub>25</sub>H<sub>20</sub>N<sub>2</sub>O<sub>5</sub>S: C, 65.21; H, 4.38; N, 6.08.

### **2-Hydroxy-*N*-mesityl-1-oxo-3-(thiophene-2-carbonyl)pyrrolo[2,1-*b*][1,3]benzothiazole-3a(1*H*)-carboxamide (12hb)**

Greenish yellow solid; yield (64 mg, 30%); mp 230–232 °C (toluene).

<sup>1</sup>H NMR (400 MHz, DMSO-*d*<sub>6</sub>): δ = 9.68 (s, 1H), 8.54 (m, 1H), 7.96 (m, 1H), 7.51 (m, 1H), 7.38 (m, 1H), 7.25 (m, 1H), 7.21–7.15 (m, 2H), 6.77 (m, 2H), 5.47 (br.s, 1H), 2.16 (s, 3H), 1.81 (s, 6H) ppm.

<sup>13</sup>C NMR (100 MHz, DMSO-*d*<sub>6</sub>): δ = 178.6, 166.4, 165.4, 154.5, 143.8, 135.7, 135.2, 134.8 (2C), 134.8, 134.0, 133.9, 131.8, 128.5, 128.2 (2C), 126.6, 125.6, 123.2, 118.0, 117.6, 81.3, 20.4, 17.2 (2C) ppm.

IR (mineral oil): 3331, 3168, 1740, 1653 cm<sup>-1</sup>.

EA: Found: C, 63.14; H, 4.29; N, 5.97. Calc. for C<sub>25</sub>H<sub>20</sub>N<sub>2</sub>O<sub>4</sub>S<sub>2</sub>: C, 63.01; H, 4.23; N, 5.88.

**3-Benzoyl-2-hydroxy-N-(4-nitrophenyl)-1-oxopyrrolo[2,1-b][1,3]benzothiazole-3a(1H)-carboxamide (12ac)**

Yellow solid; yield (96 mg, 45%); mp 220–222 °C (toluene).

<sup>1</sup>H NMR (400 MHz, DMSO-*d*<sub>6</sub>): δ = 10.87 (s, 1H), 8.17 (m, 2H), 7.81 (m, 4H), 7.57 (m, 2H), 7.47 (m, 2H), 7.40 (m, 1H), 7.26–7.12 (m, 3H), 6.67 (br.s, 1H) ppm.

<sup>13</sup>C NMR (100 MHz, DMSO-*d*<sub>6</sub>): δ = 187.7, 166.8, 166.3, 157.5, 144.4, 142.8, 137.6, 134.0, 132.3, 128.8 (2C), 128.1, 127.9 (2C), 126.7, 125.6, 124.6 (2C), 123.0, 120.0 (2C), 118.2, 115.5, 81.8 ppm.

IR (mineral oil): 3302, 3081, 1737, 1715, 1687 cm<sup>-1</sup>.

EA: Found: C, 61.90; H, 3.42; N, 8.64. Calc. for 6C<sub>24</sub>H<sub>15</sub>N<sub>3</sub>O<sub>6</sub>S · C<sub>7</sub>H<sub>8</sub>: C, 61.84; H, 3.37; N, 8.60.

**2-Hydroxy-3-(4-methylbenzoyl)-N-(4-nitrophenyl)-1-oxopyrrolo[2,1-b][1,3]benzothiazole-3a(1H)-carboxamide (12bc)**

Yellow solid; yield (83 mg, 38%); mp 210–212 °C (toluene).

<sup>1</sup>H NMR (400 MHz, DMSO-*d*<sub>6</sub>): δ = 10.79 (s, 1H), 8.17 (m, 2H), 7.77 (m, 4H), 7.53 (m, 1H), 7.39 (m, 1H), 7.28 (m, 2H), 7.21 (m, 2H), 2.37 (s, 3H) ppm.

<sup>13</sup>C NMR (100 MHz, DMSO-*d*<sub>6</sub>): δ = 187.5, 167.0, 166.2, 156.1, 144.3, 143.0, 142.8, 134.8, 134.3, 133.9, 129.0 (2C), 128.6 (2C), 126.7, 125.5, 124.6 (2C), 123.0, 120.0 (2C), 118.3, 116.2, 82.0, 21.1 ppm.

IR (mineral oil): 3221, 3081, 1711, 1694, 1663 cm<sup>-1</sup>.

EA: Found: C, 61.78; H, 3.63; N, 8.71. Calc. for C<sub>25</sub>H<sub>17</sub>N<sub>3</sub>O<sub>6</sub>S: C, 61.60; H, 3.52; N, 8.62.

**2-Hydroxy-3-(4-methoxybenzoyl)-N-(4-nitrophenyl)-1-oxopyrrolo[2,1-b][1,3]benzothiazole-3a(1H)-carboxamide (12cc)**

Yellow solid; yield (75 mg, 33%); mp 224–226 °C (toluene).

<sup>1</sup>H NMR (400 MHz, DMSO-*d*<sub>6</sub>): δ = 10.71 (s, 1H), 8.17 (m, 2H), 7.87 (m, 2H), 7.79 (m, 2H), 7.53 (m, 1H), 7.39 (m, 1H), 7.21 (m, 2H), 7.02 (m, 2H), 3.84 (s, 3H) ppm.

<sup>13</sup>C NMR (100 MHz, DMSO-*d*<sub>6</sub>): δ = 186.5, 167.1, 166.1, 163.1, 154.3, 144.3, 142.9, 134.6, 133.8, 131.4 (2C), 129.8, 126.7, 125.5, 124.6 (2C), 123.0, 120.1 (2C), 118.4, 117.0, 113.5 (2C), 82.2, 55.5 ppm.

IR (mineral oil): 3306, 3145, 1732, 1715, 1697 cm<sup>-1</sup>.

EA: Found: C, 59.79; H, 3.51; N, 8.42. Calc. for C<sub>25</sub>H<sub>17</sub>N<sub>3</sub>O<sub>7</sub>S: C, 59.64; H, 3.40; N, 8.35.

**3-(4-Fluorobenzoyl)-2-hydroxy-N-(4-nitrophenyl)-1-oxopyrrolo[2,1-b][1,3]benzothiazole-3a(1H)-carboxamide (12dc)**

Yellow solid; yield (66 mg, 30%); mp 224–226 °C (toluene).

<sup>1</sup>H NMR (400 MHz, DMSO-*d*<sub>6</sub>): δ = 11.03 (s, 1H), 8.17 (m, 2H), 7.92 (m, 2H), 7.76 (m, 2H), 7.54 (m, 1H), 7.38 (m, 1H), 7.27 (m, 2H), 7.25–7.16 (m, 2H) ppm.

<sup>13</sup>C NMR (100 MHz, DMSO-*d*<sub>6</sub>): δ = 185.7, 166.7, 166.6, 165.5, 163.0, 144.5, 142.7, 134.5, 134.2, 133.4, 131.6, 131.5, 126.5, 125.5, 124.7 (2C), 123.0, 119.7 (2C), 117.9, 114.8, 114.6, 113.6, 81.5 ppm.

IR (mineral oil): 3347, 3156, 1737, 1713, 1684 cm<sup>-1</sup>.

EA: Found: C, 58.72; H, 2.92; N, 8.60. Calc. for C<sub>24</sub>H<sub>14</sub>FN<sub>3</sub>O<sub>6</sub>S: C, 58.66; H, 2.87; N, 8.55.

### **3-(4-Chlorobenzoyl)-2-hydroxy-*N*-(4-nitrophenyl)-1-oxopyrrolo[2,1-*b*][1,3]benzothiazole-3a(1*H*)-carboxamide (12ec)**

Yellow solid; yield (78 mg, 34%); mp 221–223 °C (toluene).

<sup>1</sup>H NMR (400 MHz, DMSO-*d*<sub>6</sub>): δ = 11.00 (s, 1H), 8.59 (br.s, 1H), 8.17 (m, 2H), 7.83 (m, 2H), 7.76 (m, 2H), 7.53 (m, 3H), 7.38 (m, 1H), 7.24–7.16 (m, 2H) ppm.

<sup>13</sup>C NMR (100 MHz, DMSO-*d*<sub>6</sub>): δ = 186.0, 166.6, 166.5, 160.3, 144.5, 142.7, 136.8, 136.6, 134.2, 133.4, 130.6 (2C), 127.9 (2C), 126.6, 125.5, 124.7 (2C), 123.0, 119.8 (2C), 118.0, 113.7, 81.4 ppm.

IR (mineral oil): 3349, 3085, 1730, 1715, 1692 cm<sup>-1</sup>.

EA: Found: C, 56.83; H, 2.91; N, 8.32. Calc. for C<sub>24</sub>H<sub>14</sub>ClN<sub>3</sub>O<sub>6</sub>S: C, 56.76; H, 2.78; N, 8.27.

### **3-(4-Bromobenzoyl)-2-hydroxy-*N*-(4-nitrophenyl)-1-oxopyrrolo[2,1-*b*][1,3]benzothiazole-3a(1*H*)-carboxamide (12fc)**

Yellow solid; yield (80 mg, 32%); mp 214–216 °C (toluene).

<sup>1</sup>H NMR (400 MHz, DMSO-*d*<sub>6</sub>): δ = 11.02 (s, 1H), 9.84 (br.s, 1H), 8.17 (m, 2H), 7.76 (m, 4H), 7.66 (m, 2H), 7.55 (m, 1H), 7.38 (m, 1H), 7.24–7.16 (m, 2H) ppm.

<sup>13</sup>C NMR (100 MHz, DMSO-*d*<sub>6</sub>): δ = 186.6, 167.2, 167.1, 161.1, 145.0, 143.3, 137.7, 134.8, 133.9, 131.4 (2C), 131.3 (2C), 127.1, 126.17, 126.1, 125.3 (2C), 123.6, 120.4 (2C), 118.5, 114.2, 82.0 ppm.

IR (mineral oil): 3300, 3171, 1730, 1714, 1677 cm<sup>-1</sup>.

EA: Found: C, 52.31; H, 2.63; N, 7.74. Calc. for C<sub>24</sub>H<sub>14</sub>BrN<sub>3</sub>O<sub>6</sub>S: C, 52.19; H, 2.55; N, 7.61.

### **2-Hydroxy-*N*-(4-nitrophenyl)-1-oxo-3-(thiophene-2-carbonyl)pyrrolo[2,1-*b*][1,3]benzothiazole-3a(1*H*)-carboxamide (12hc)**

Yellow solid; yield (65 mg, 30%); mp 216–218 °C (toluene).

<sup>1</sup>H NMR (400 MHz, DMSO-*d*<sub>6</sub>): δ = 11.04 (s, 1H), 9.55 (br.s, 1H), 8.65 (m, 1H), 8.17 (m, 2H), 7.92 (m, 1H), 7.75 (m, 2H), 7.54 (m, 1H), 7.36 (m, 1H), 7.25 (m, 2H), 7.17 (m, 1H) ppm.

<sup>13</sup>C NMR (100 MHz, DMSO-*d*<sub>6</sub>): δ = 177.5, 167.0, 166.4, 160.0, 144.5 (2C), 142.6, 134.3, 133.9, 133.2, 133.0, 128.1, 126.4, 125.5, 124.7 (2C), 123.0, 119.7 (2C), 117.7, 113.5, 81.3 ppm.

IR (mineral oil): 3307, 3154, 1745, 1720, 1653 cm<sup>-1</sup>.

EA: Found: C, 55.43; H, 2.75; N, 8.81. Calc. for C<sub>22</sub>H<sub>13</sub>N<sub>3</sub>O<sub>6</sub>S<sub>2</sub>: C, 55.11; H, 2.73; N, 8.76.

***N*-(2-Acetamidophenyl)-3-benzoyl-2-hydroxy-1-oxopyrrolo[2,1-*b*][1,3]benzothiazole-3a(1*H*)-carboxamide (12ad)**

Beige solid; yield (140 mg, 64%); mp 176–178°C (toluene).

<sup>1</sup>H NMR (400 MHz, DMSO-*d*<sub>6</sub>): δ = 9.92 (s, 1H), 9.71 (s, 1H), 9.10 (br.s, 1H), 7.82 (m, 2H), 7.62 (m, 1H), 7.55–7.48 (m, 5H), 7.25 (m, 2H), 7.15 (m, 3H), 2.01 (s, 3H) ppm.

<sup>13</sup>C NMR (100 MHz, DMSO-*d*<sub>6</sub>): δ = 188.1, 169.3, 166.3, 165.5, 154.6, 137.3, 133.7, 133.6, 132.6, 131.2, 130.2, 128.8 (2C), 128.1 (2C), 126.7, 125.8, 125.6, 125.5, 124.9, 124.5, 123.3, 118.2, 117.9, 80.6, 22.8 ppm.

IR (mineral oil): 3288, 3132, 1733, 1673, 1648, 1638 cm<sup>-1</sup>.

EA: Found: C 64.46; H 3.99; N 8.70. Calc. for C<sub>26</sub>H<sub>19</sub>N<sub>3</sub>O<sub>5</sub>S: C 64.32; H 3.94; N 8.65.

***N*-(2-Acetamidophenyl)-3-(4-methylbenzoyl)-2-hydroxy-1-oxopyrrolo[2,1-*b*][1,3]benzothiazole-3a(1*H*)-carboxamide (12bd)**

Beige solid; yield (157 mg, 70%); mp 197–199°C (toluene).

<sup>1</sup>H NMR (400 MHz, DMSO-*d*<sub>6</sub>): δ = 9.88 (s, 1H), 9.71 (s, 1H), 7.74 (m, 2H), 7.54 (m, 1H), 7.44 (m, 2H), 7.32 (m, 2H), 7.24 (m, 2H), 7.15 (m, 3H), 2.39 (s, 3H), 2.02 (s, 3H) ppm.

<sup>13</sup>C NMR (100 MHz, DMSO-*d*<sub>6</sub>): δ = 188.4, 169.9, 166.9, 166.0, 154.1, 143.9, 135.2, 134.3, 134.3, 131.7, 130.8, 129.6 (2C), 129.3 (2C), 127.2, 126.4, 126.2, 126.1, 125.4, 125.1, 123.9, 119.2, 118.5, 81.2, 23.4, 21.7 ppm.

IR (mineral oil): 3288, 3188, 1717, 1673, 1651 cm<sup>-1</sup>.

EA: Found: C, 65.15; H, 4.41; N, 8.50. Calc. for C<sub>27</sub>H<sub>21</sub>N<sub>3</sub>O<sub>5</sub>S: C, 64.92; H, 4.24; N, 8.41.



MAN6910.005.esp

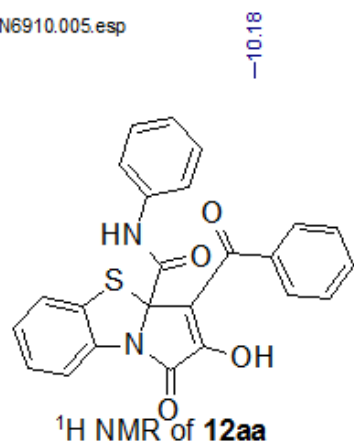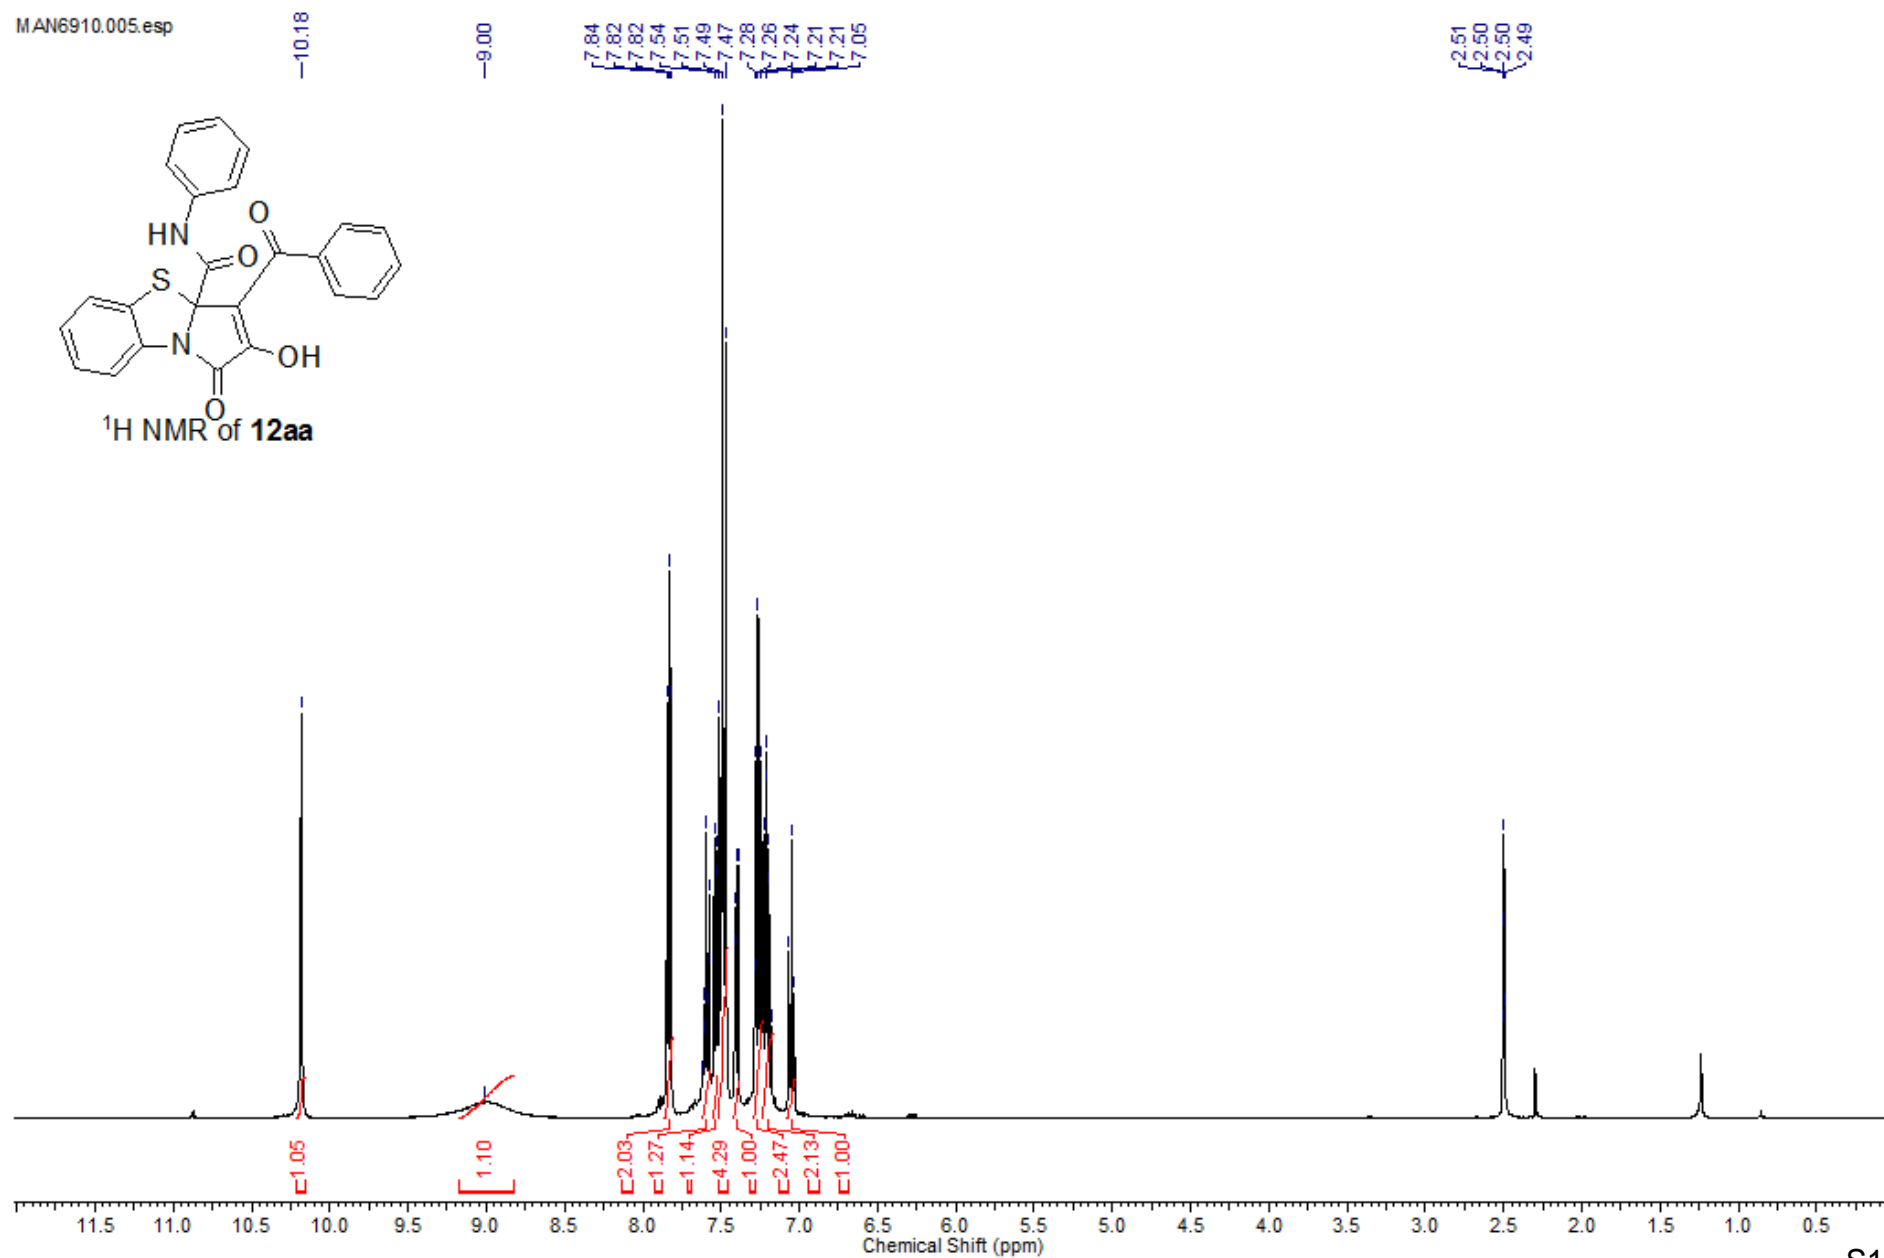

MAN6910.006.esp

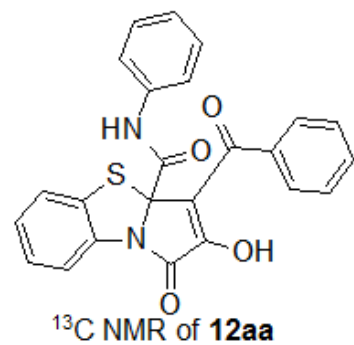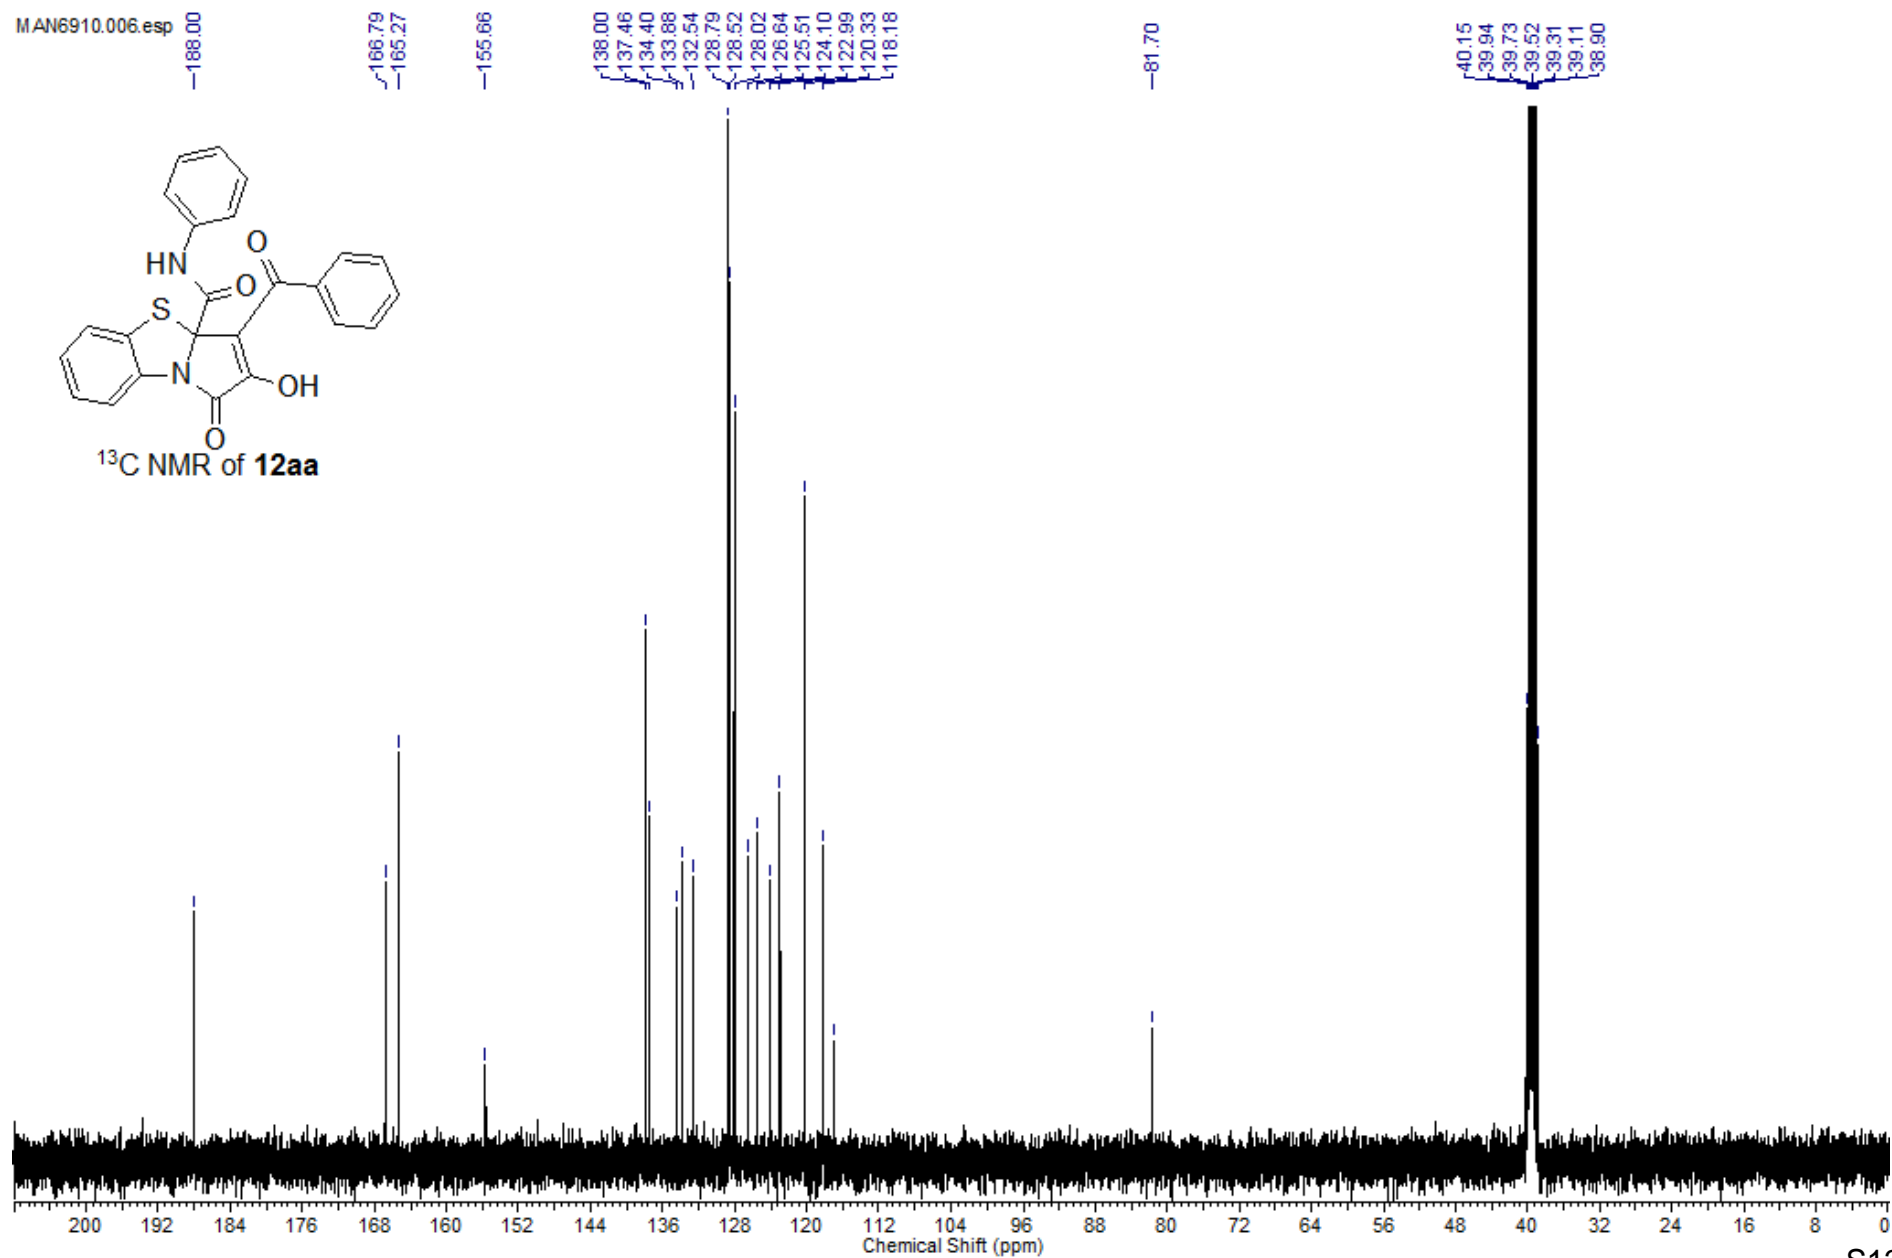

MAN6910.007.esp

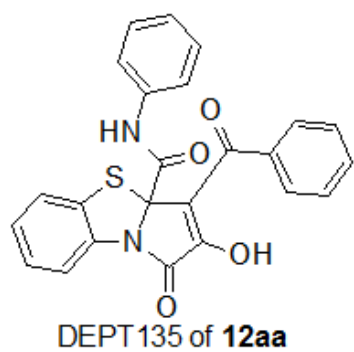

132.55  
128.79  
128.53  
128.03  
126.65  
125.52  
124.10  
122.99  
120.33  
118.18

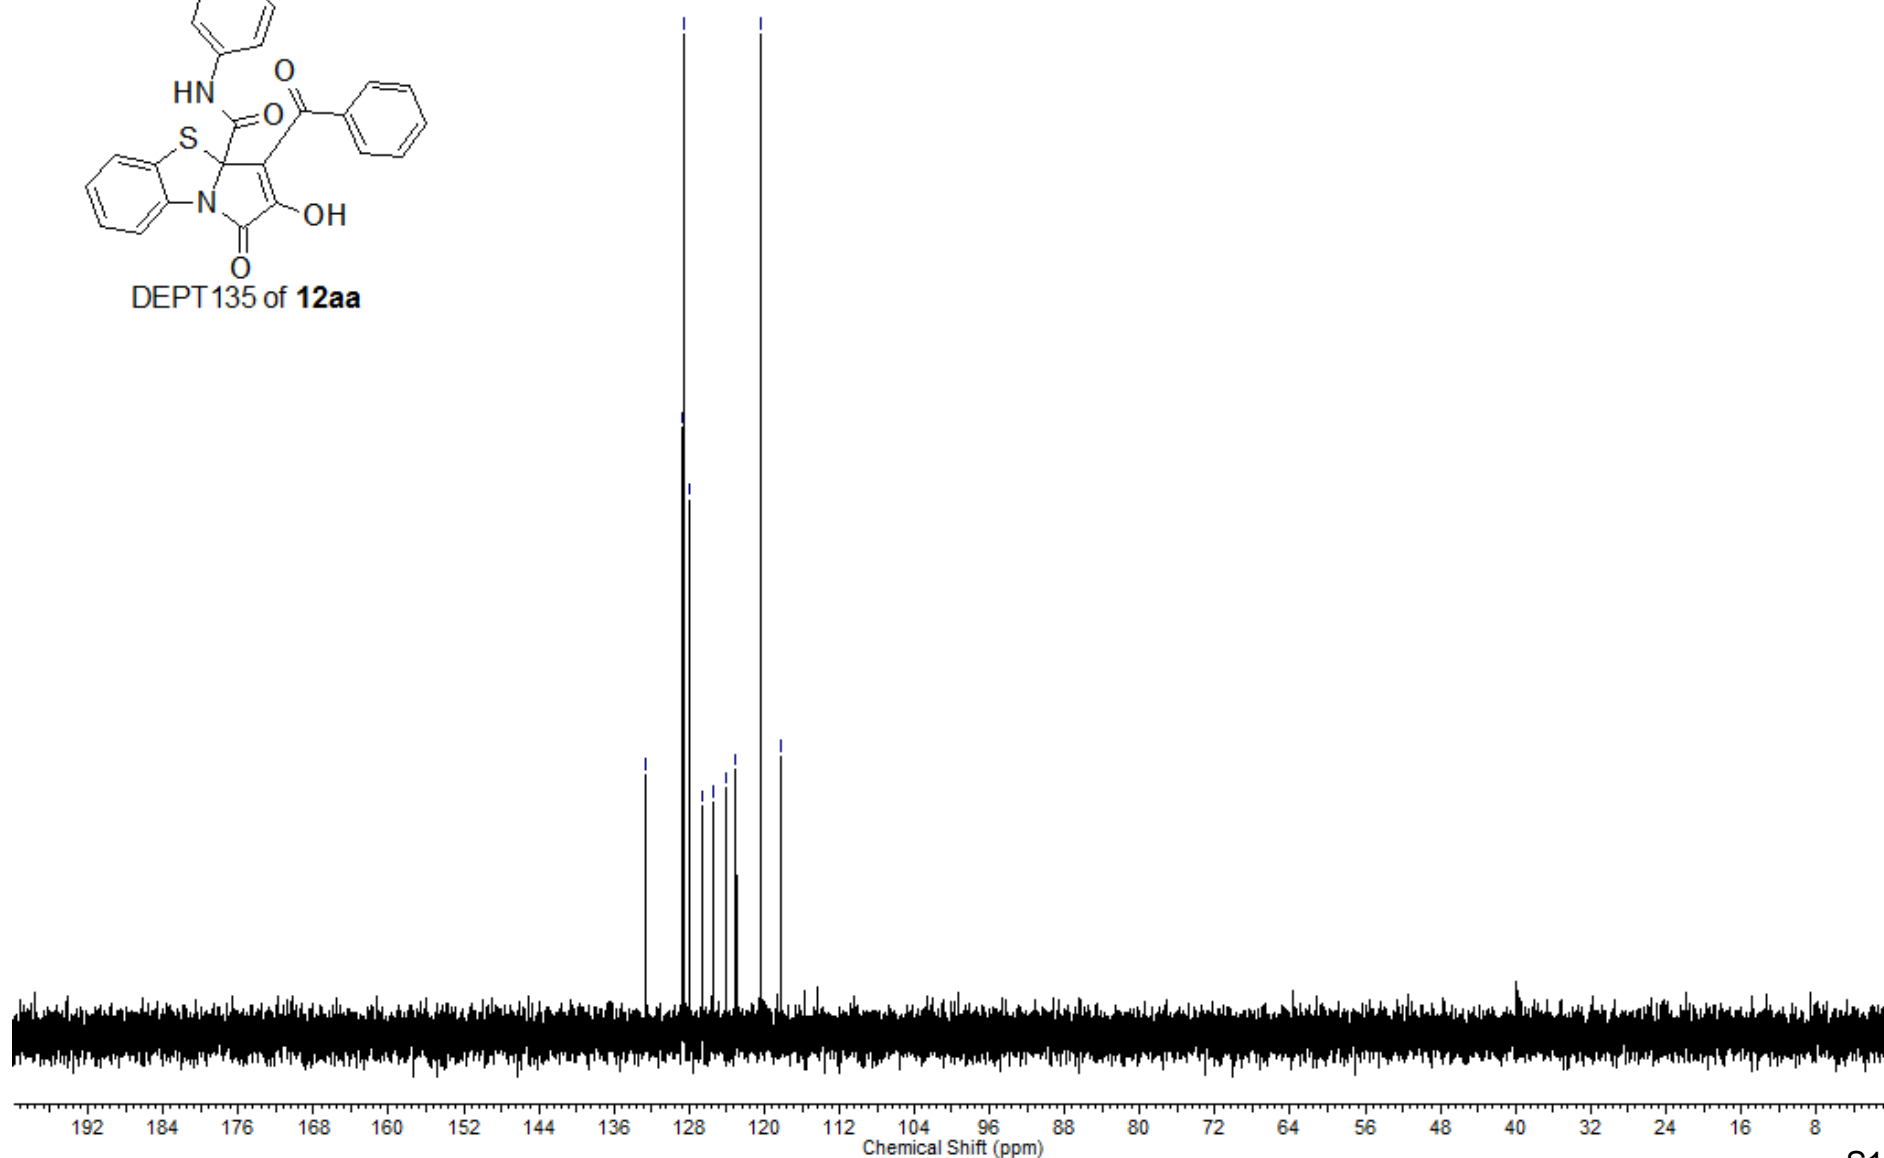

MAN7781.001.esp

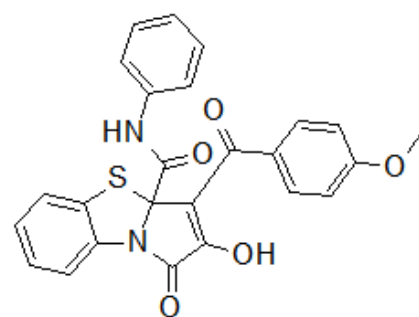

<sup>1</sup>H NMR of 12ca

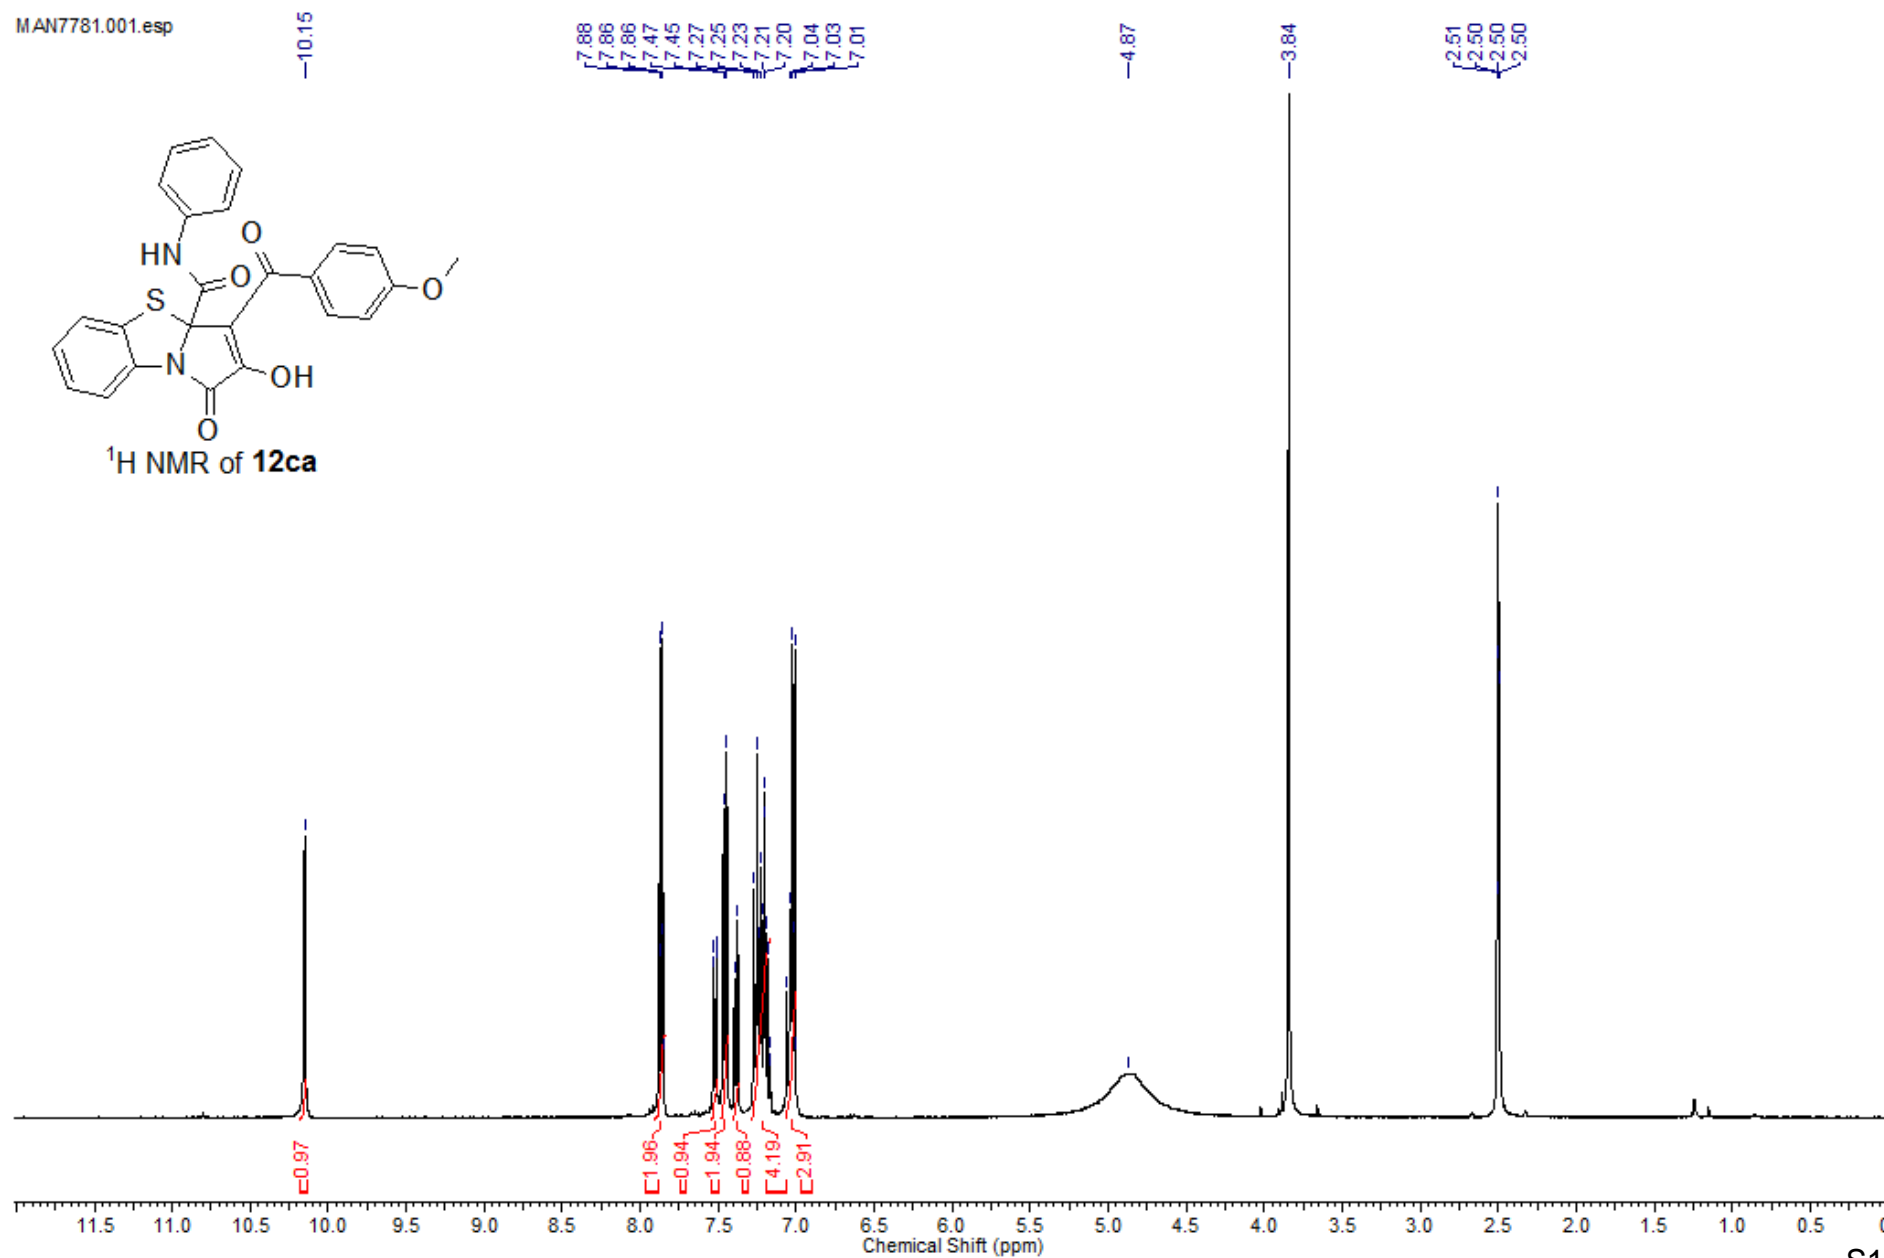

MAN7781.002.esp

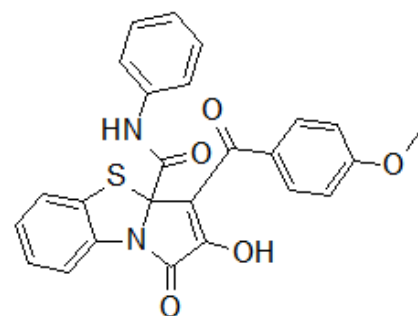

<sup>13</sup>C NMR of **12ca**

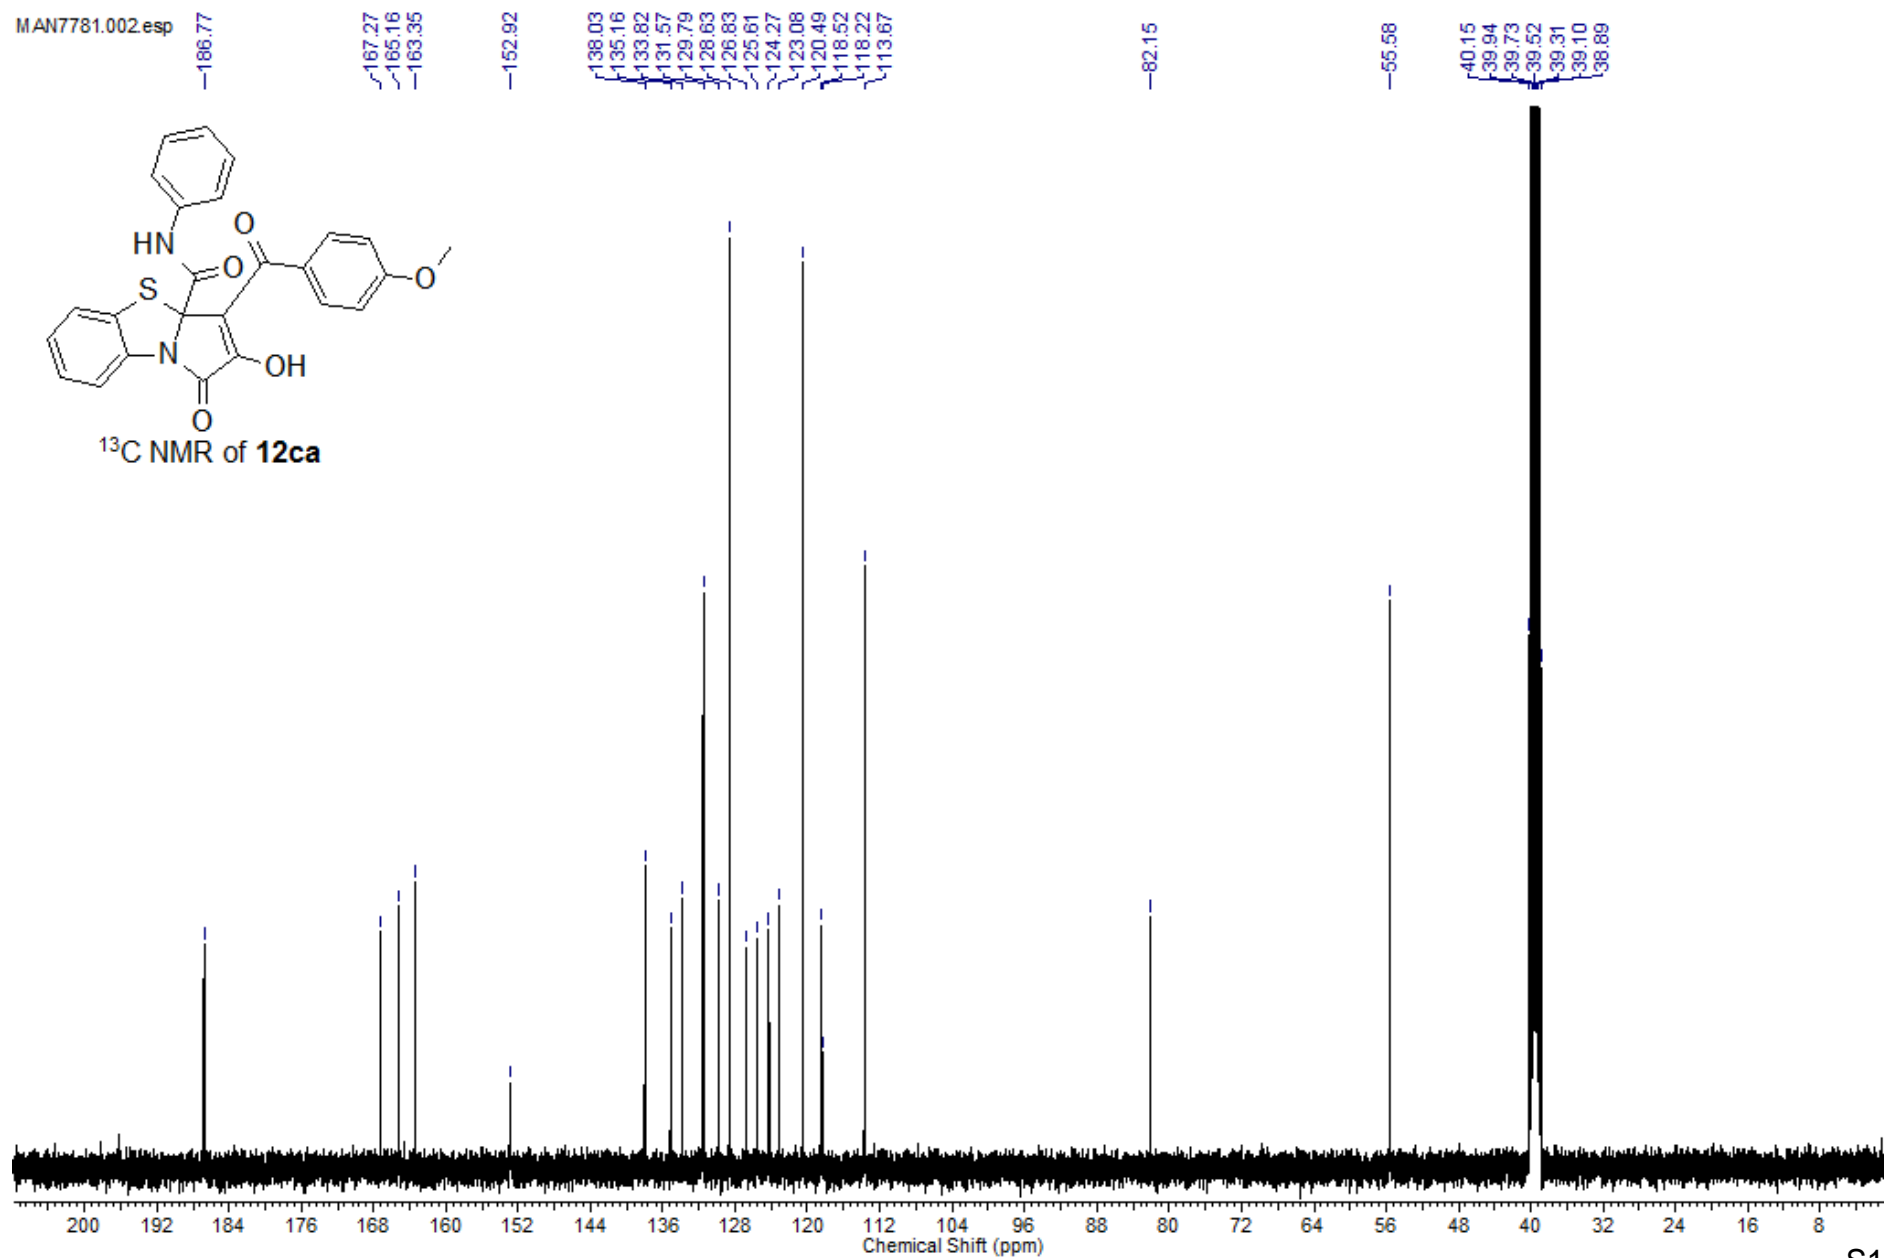

MAN7781.003.esp

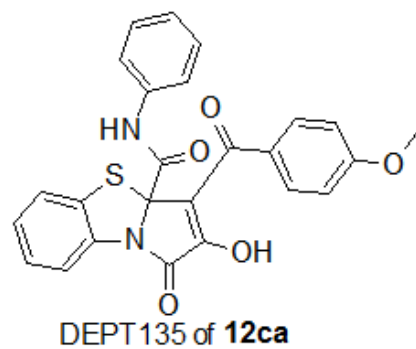

131.57  
126.63  
126.83  
125.81  
124.27  
123.08  
120.49  
118.52  
113.67

55.58

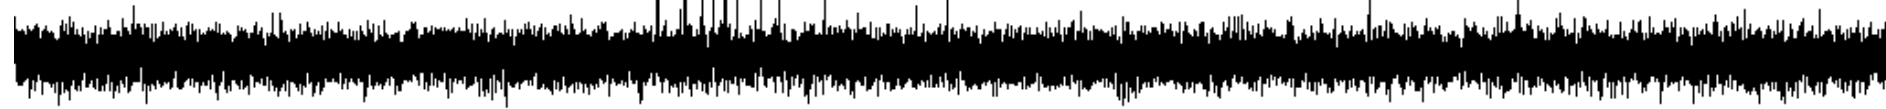

MAN6907.004.esp

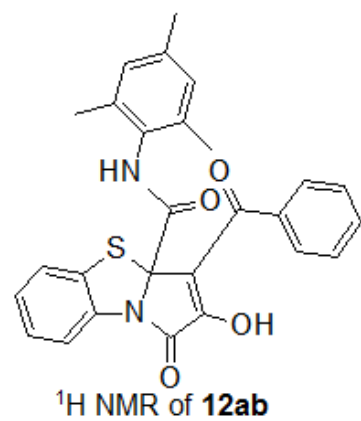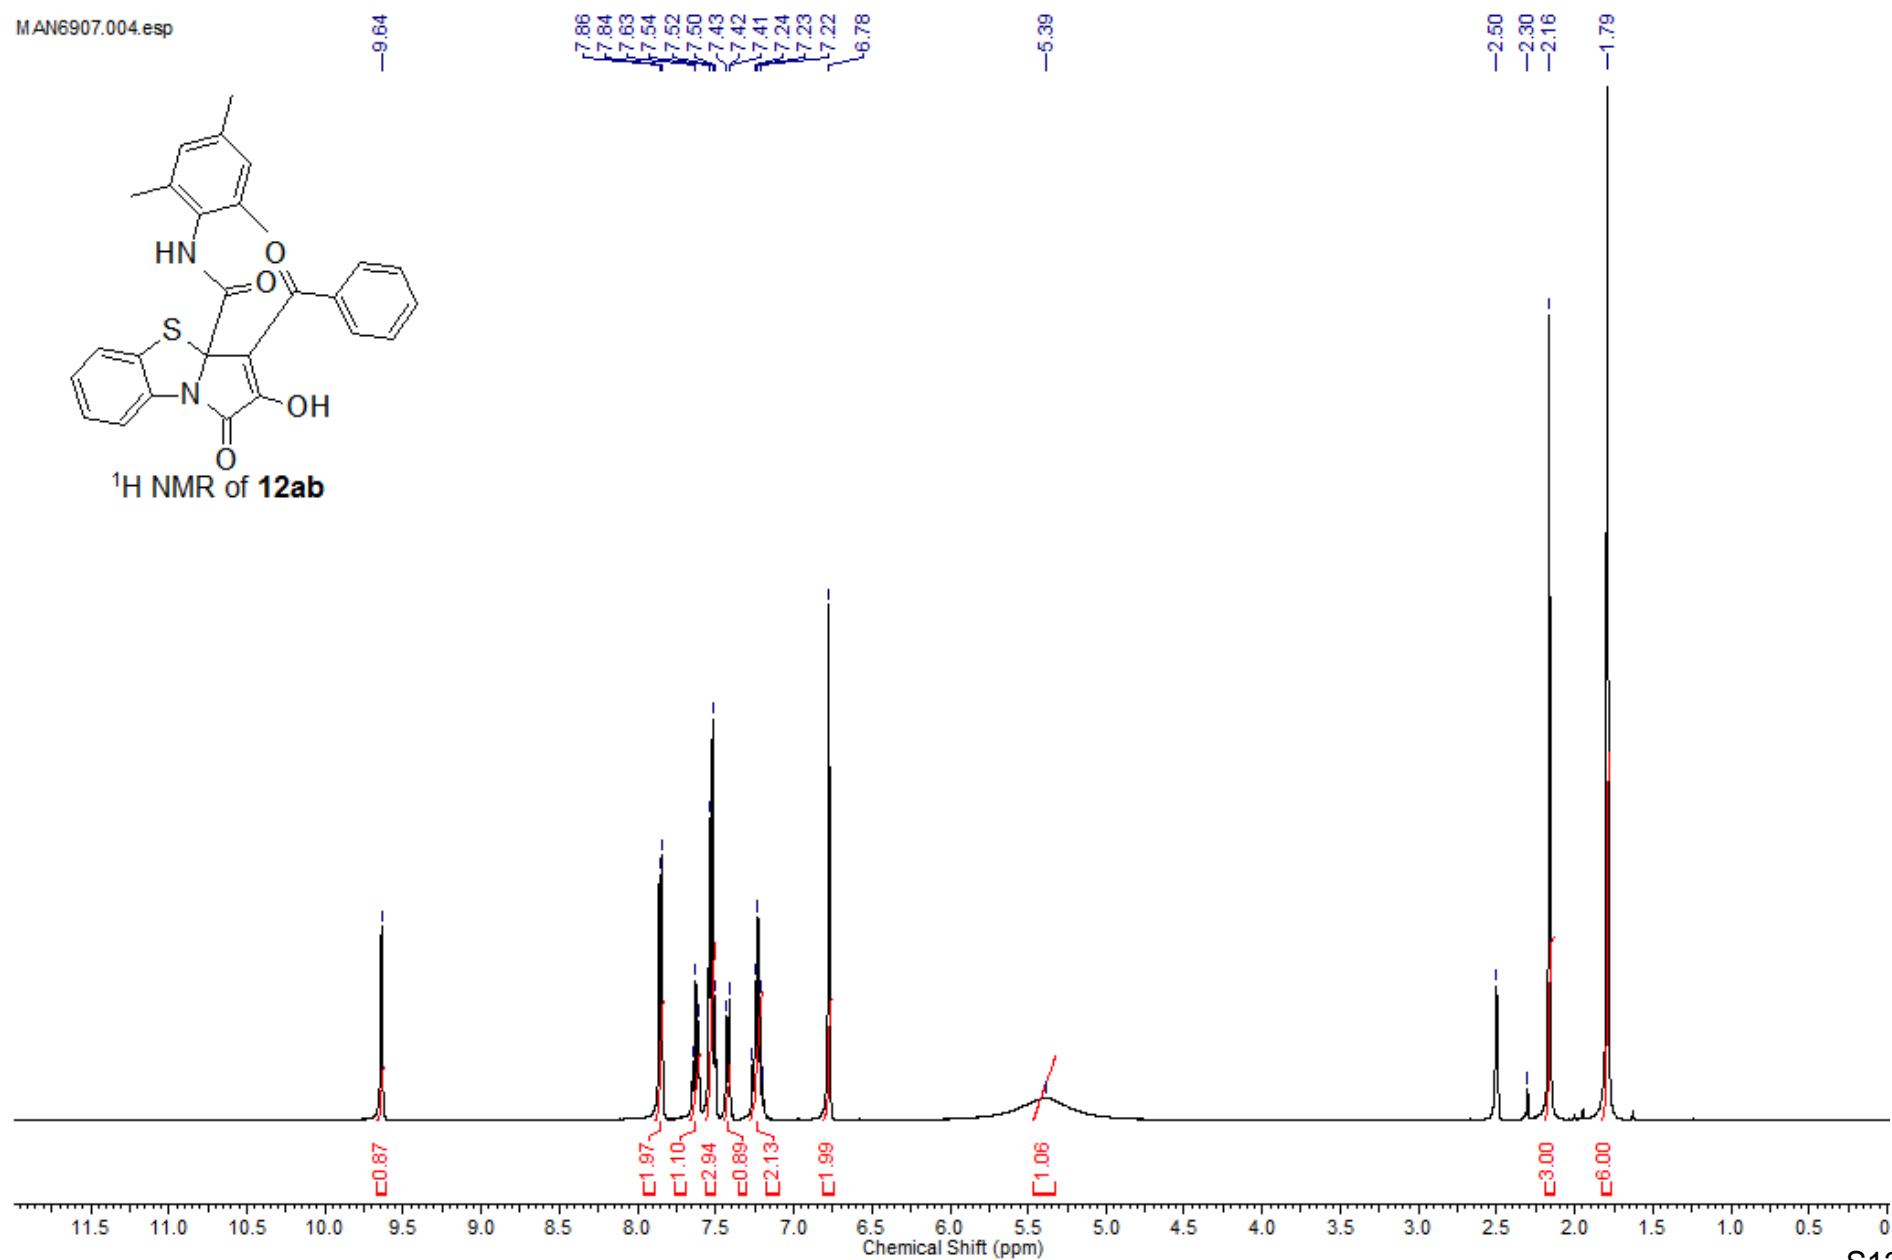

MAN6907.002.esp

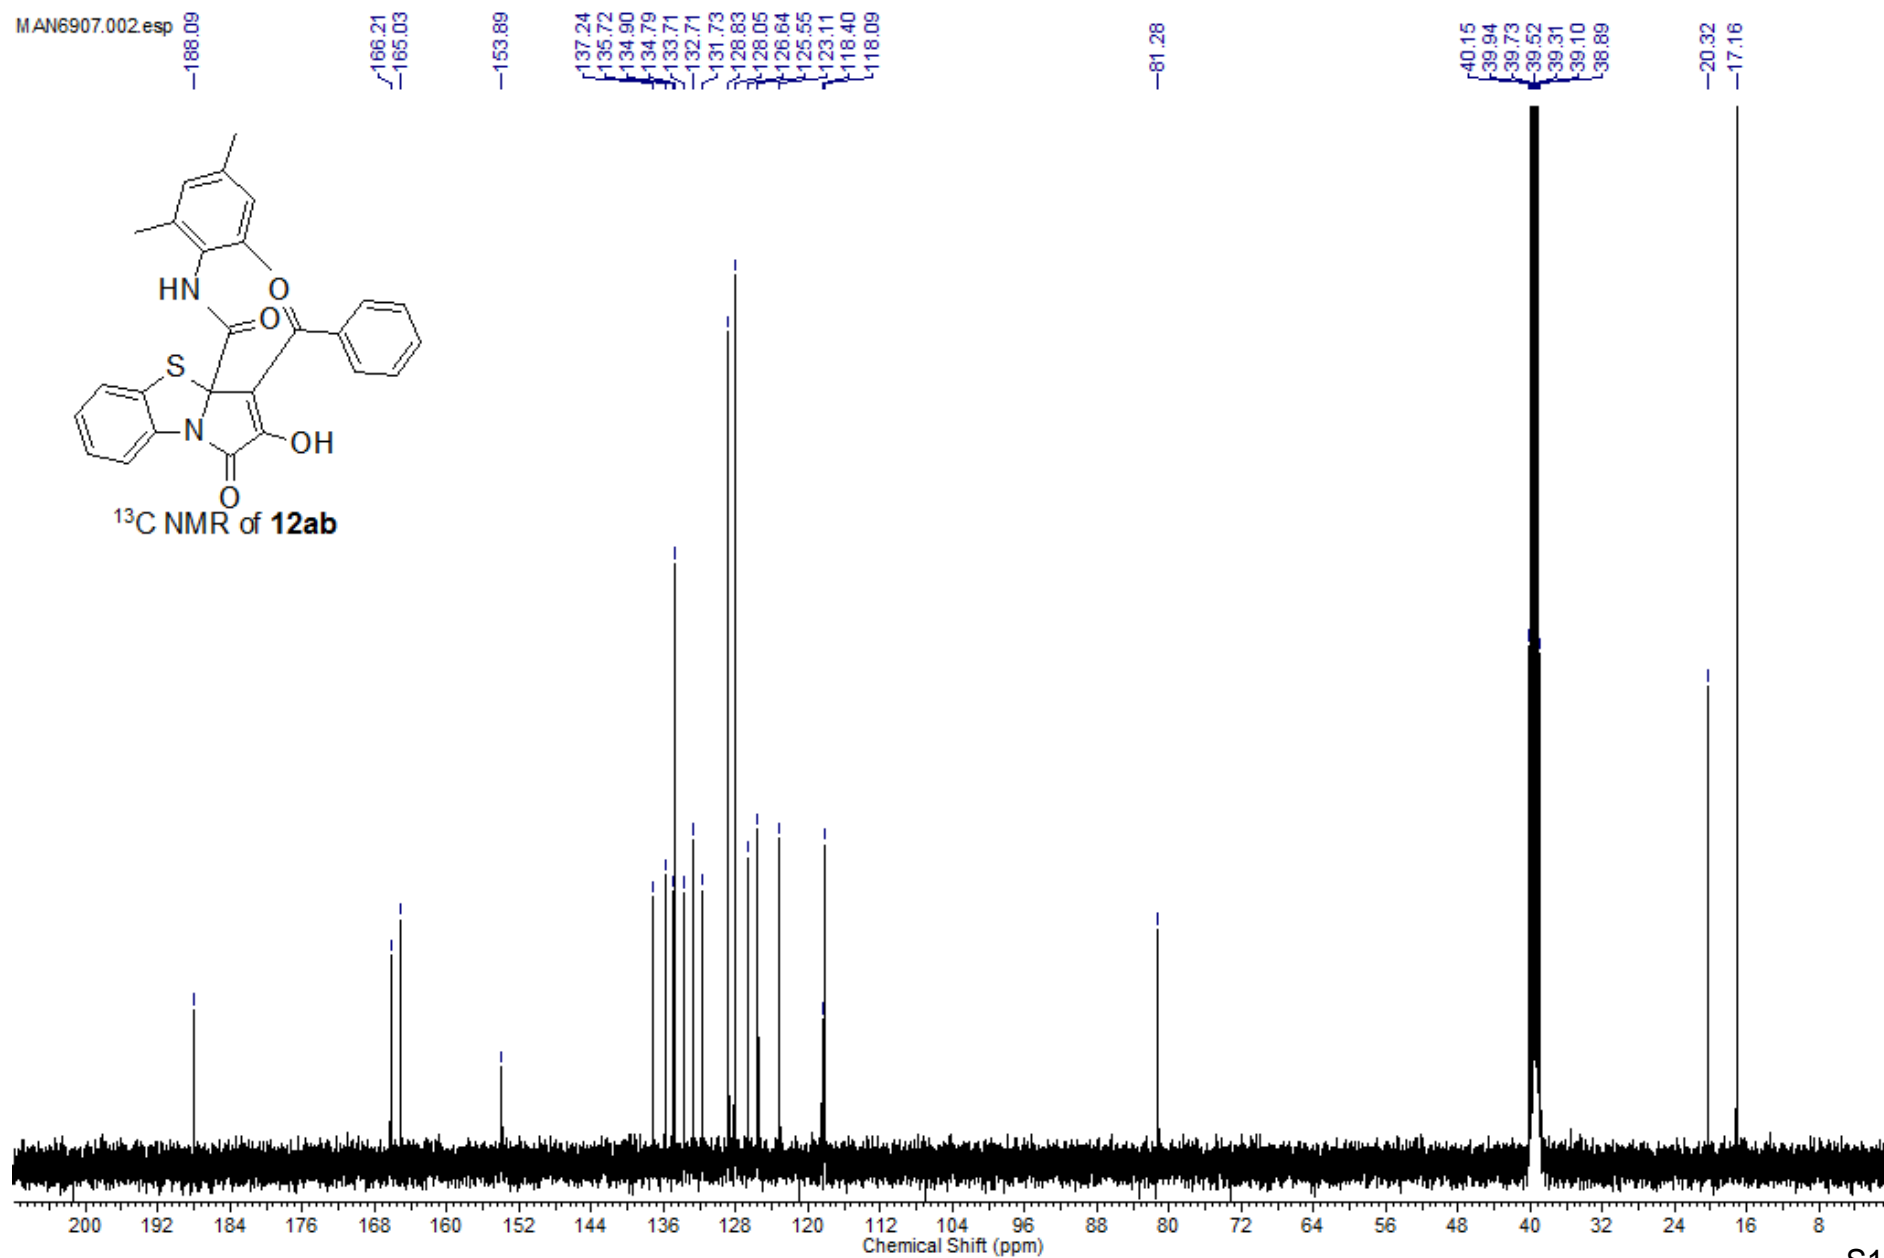



MAN6907.003.esp

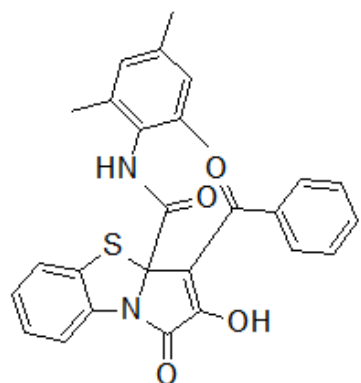

DEPT135 of **12ab**

132.70  
128.82  
128.09  
128.05  
126.63  
125.55  
123.10  
-118.09

-20.31  
-17.16

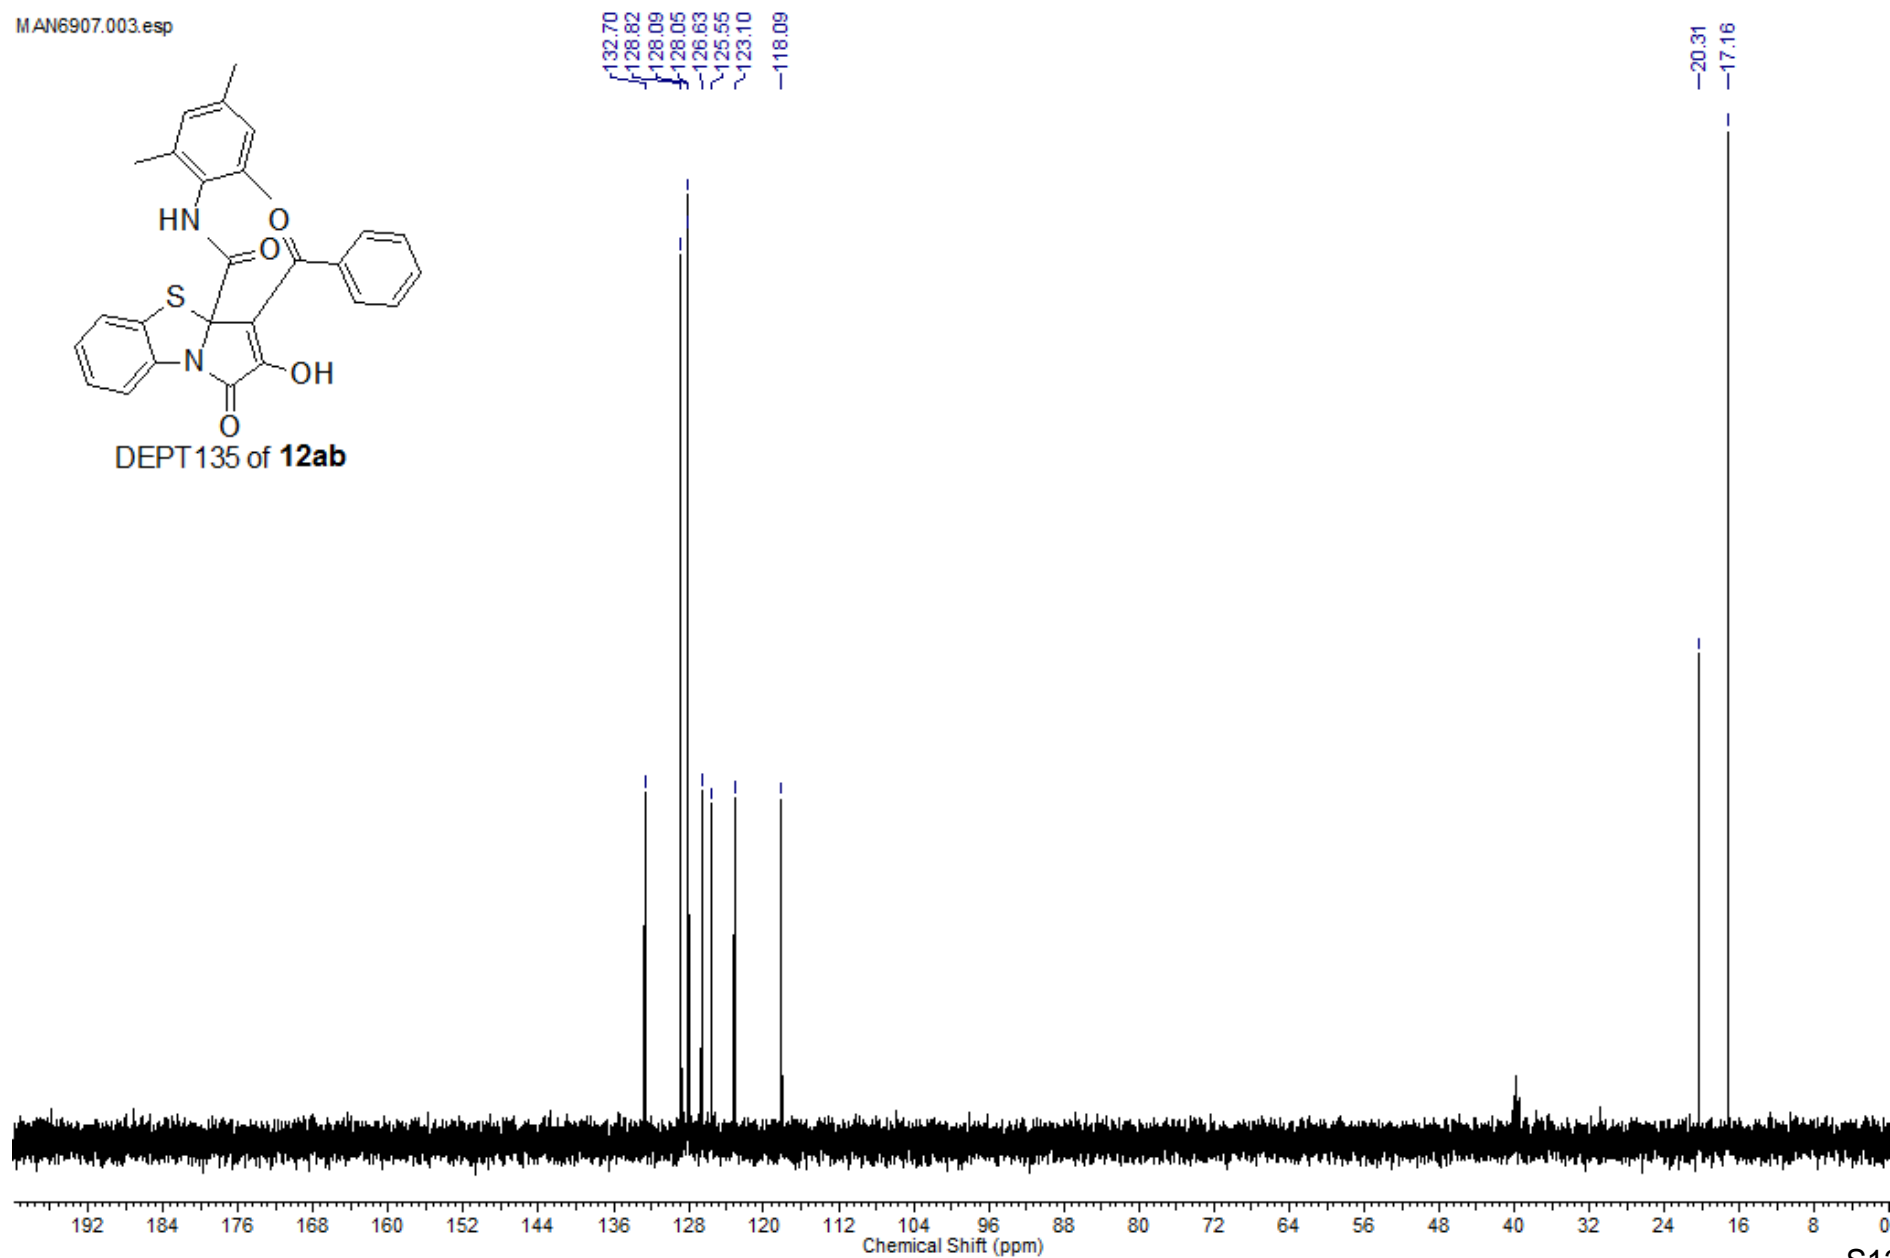

MAN6957.001.esp

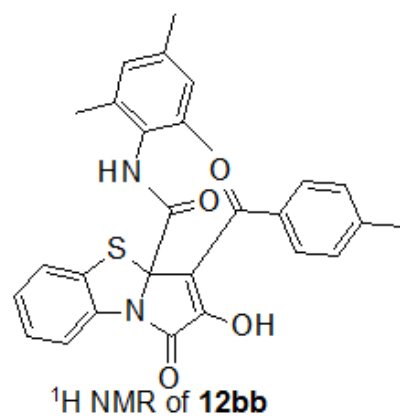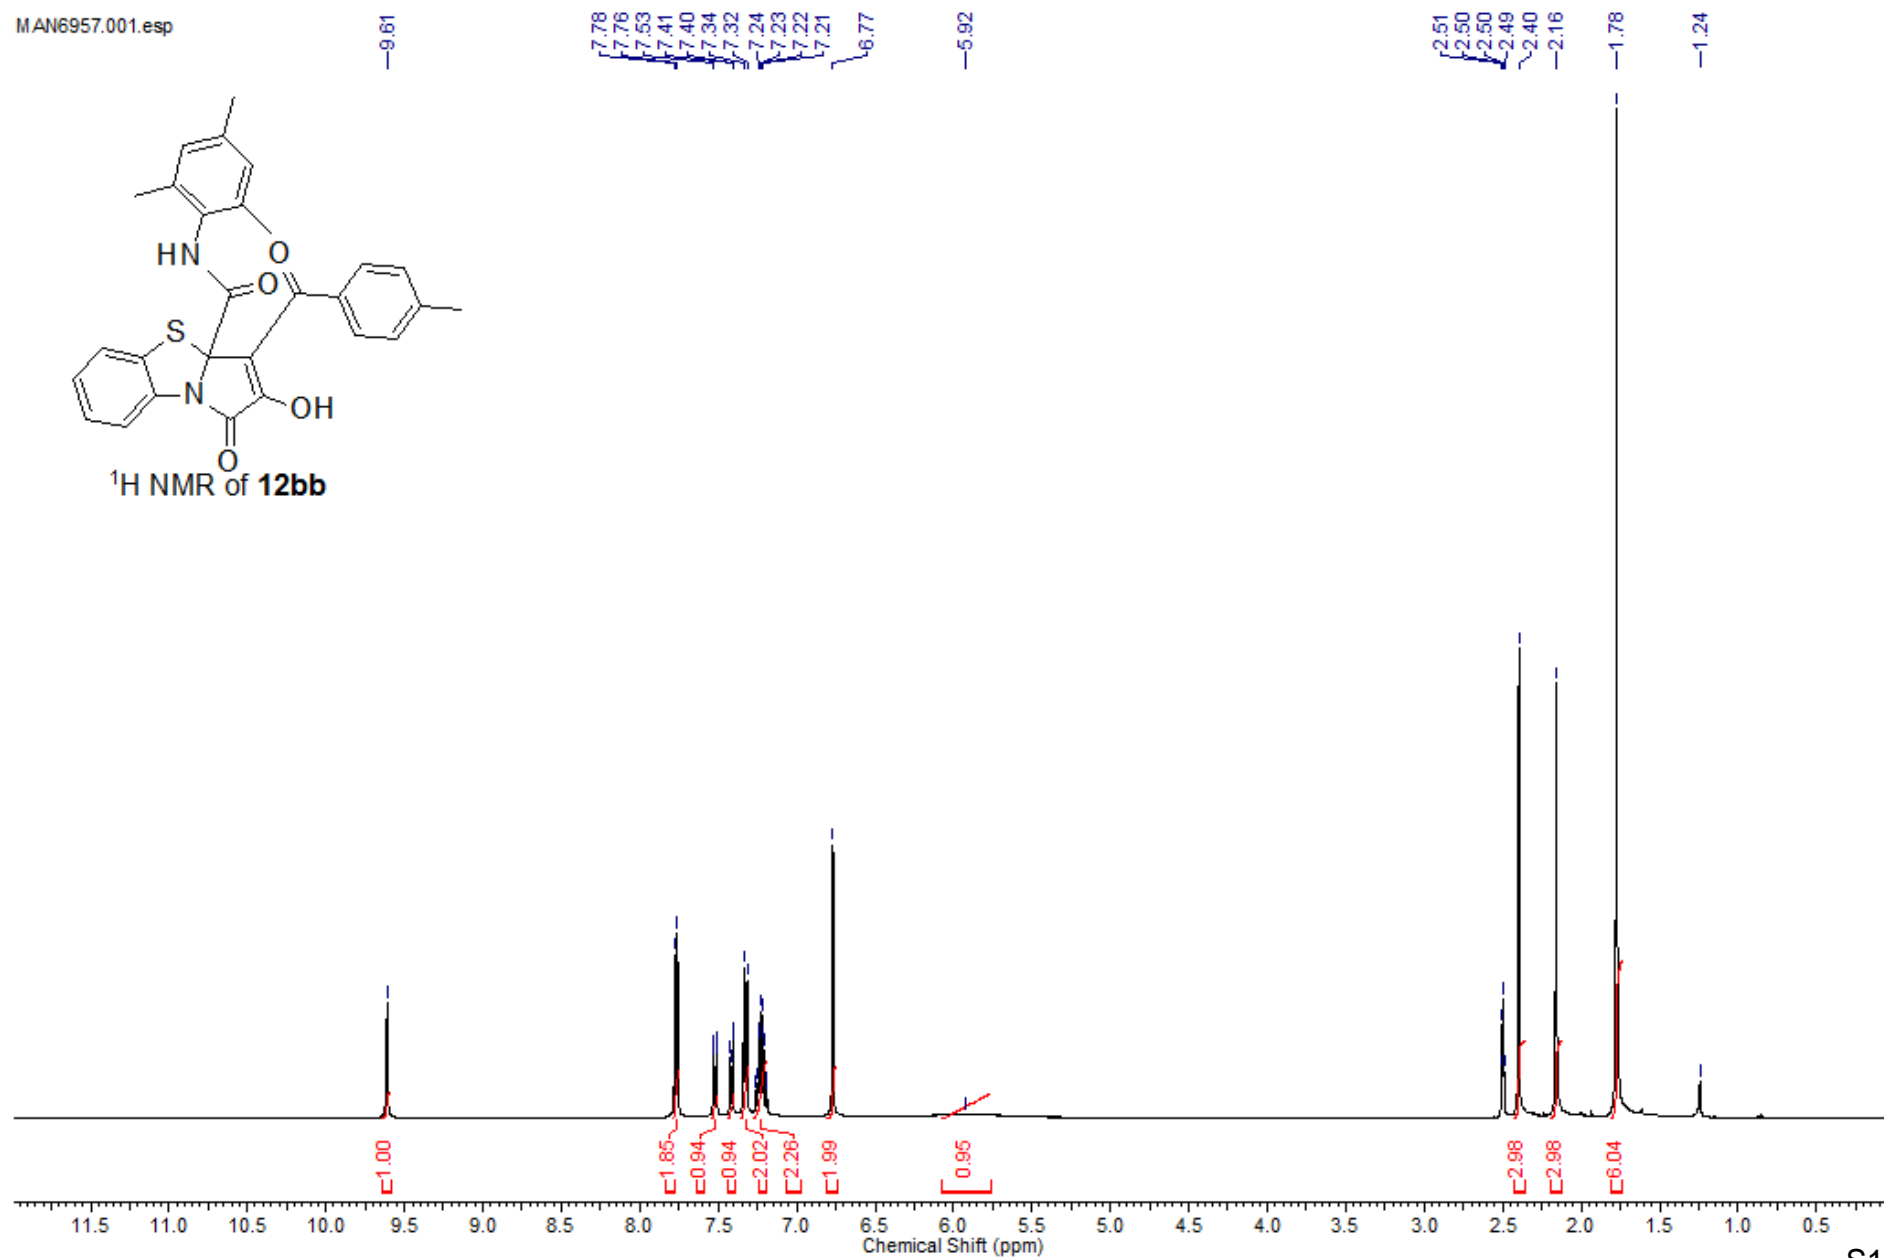

MAN6957.002.esp

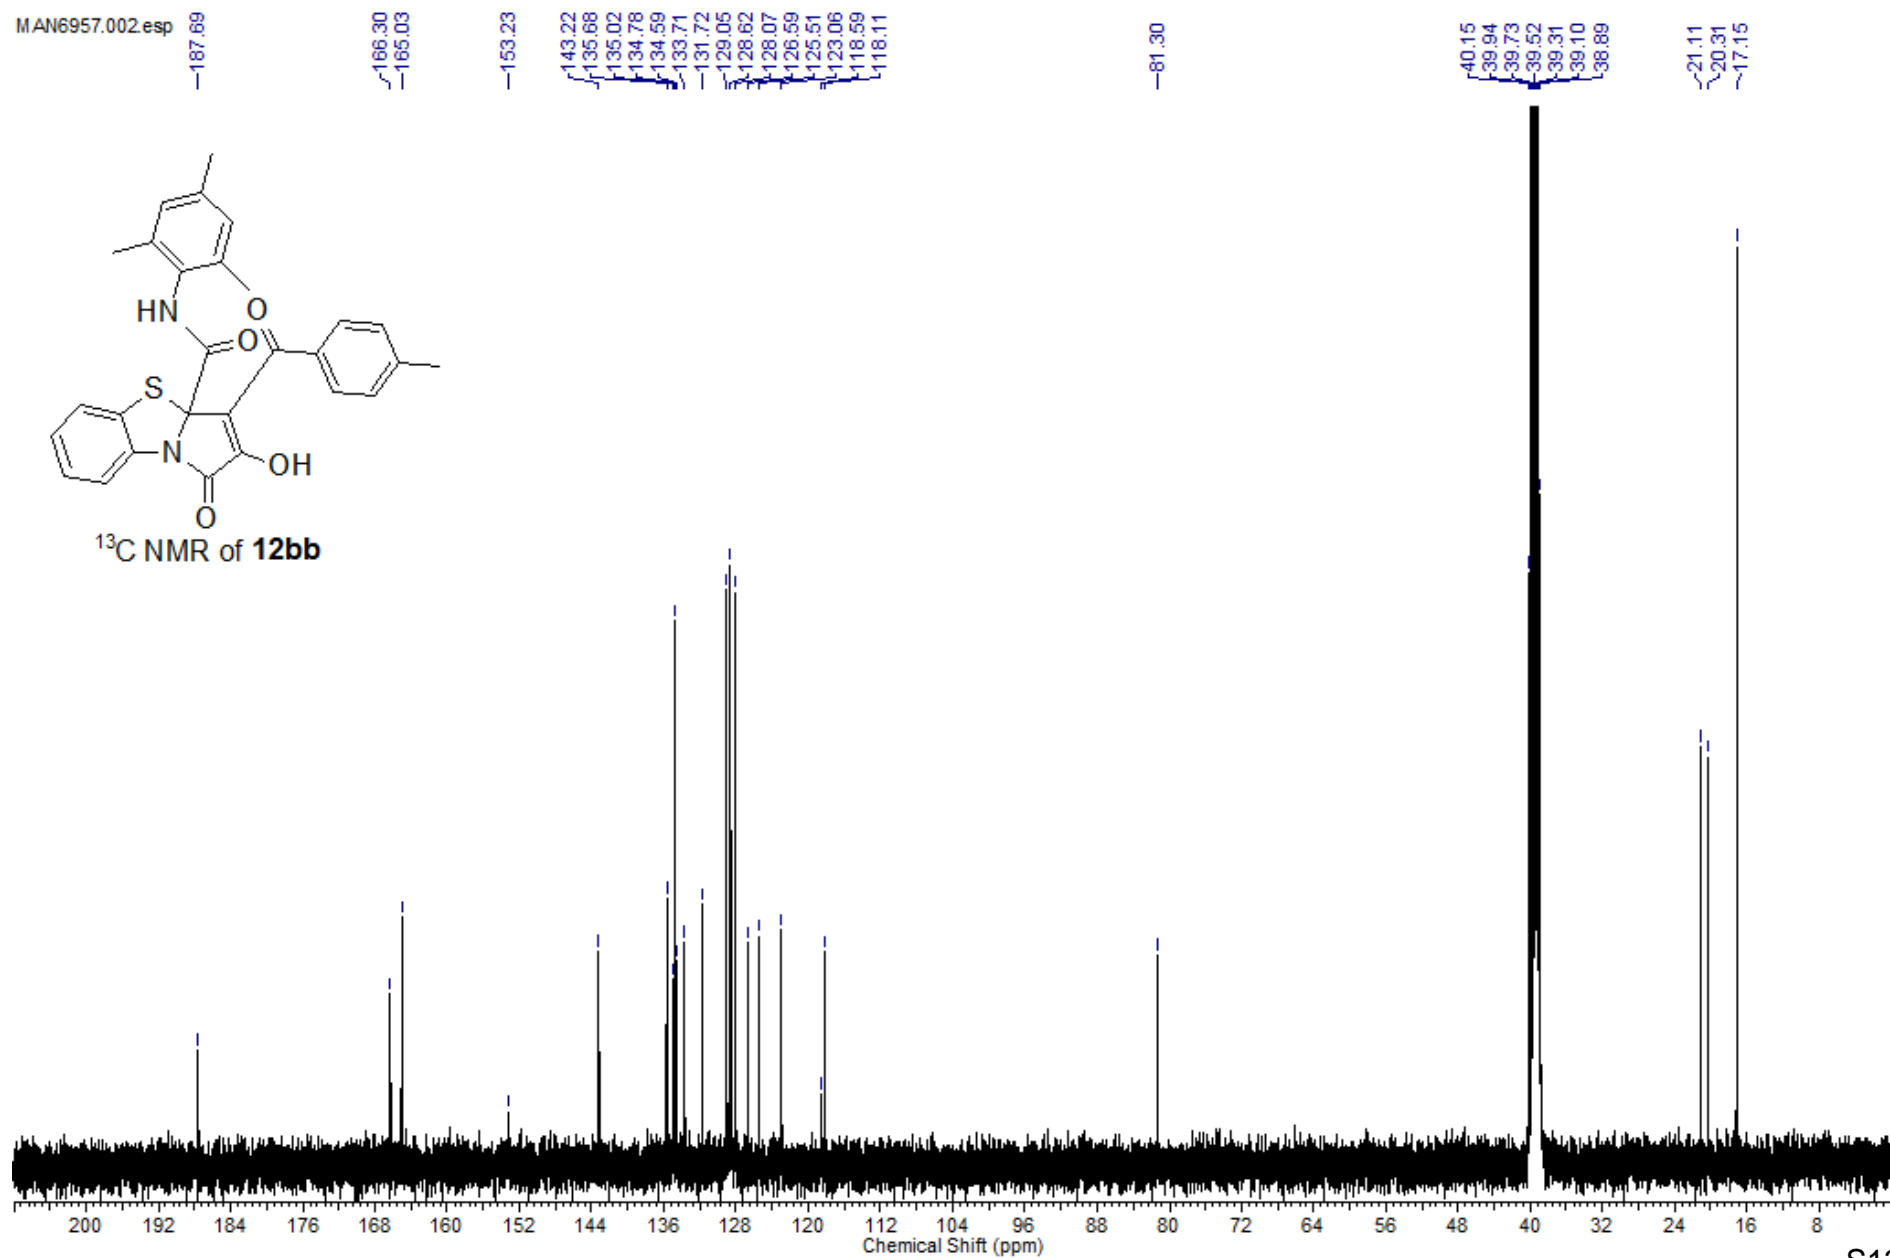

MAN6957.003.esp

129.05  
128.62  
128.07  
126.59  
125.51  
123.05  
118.11

21.11  
20.30  
17.15

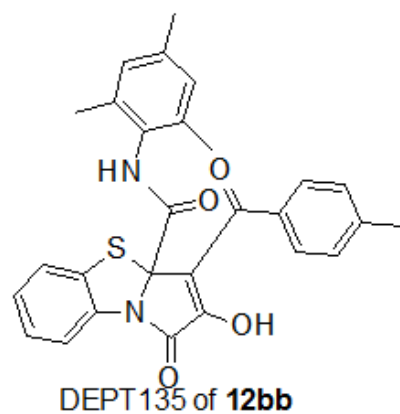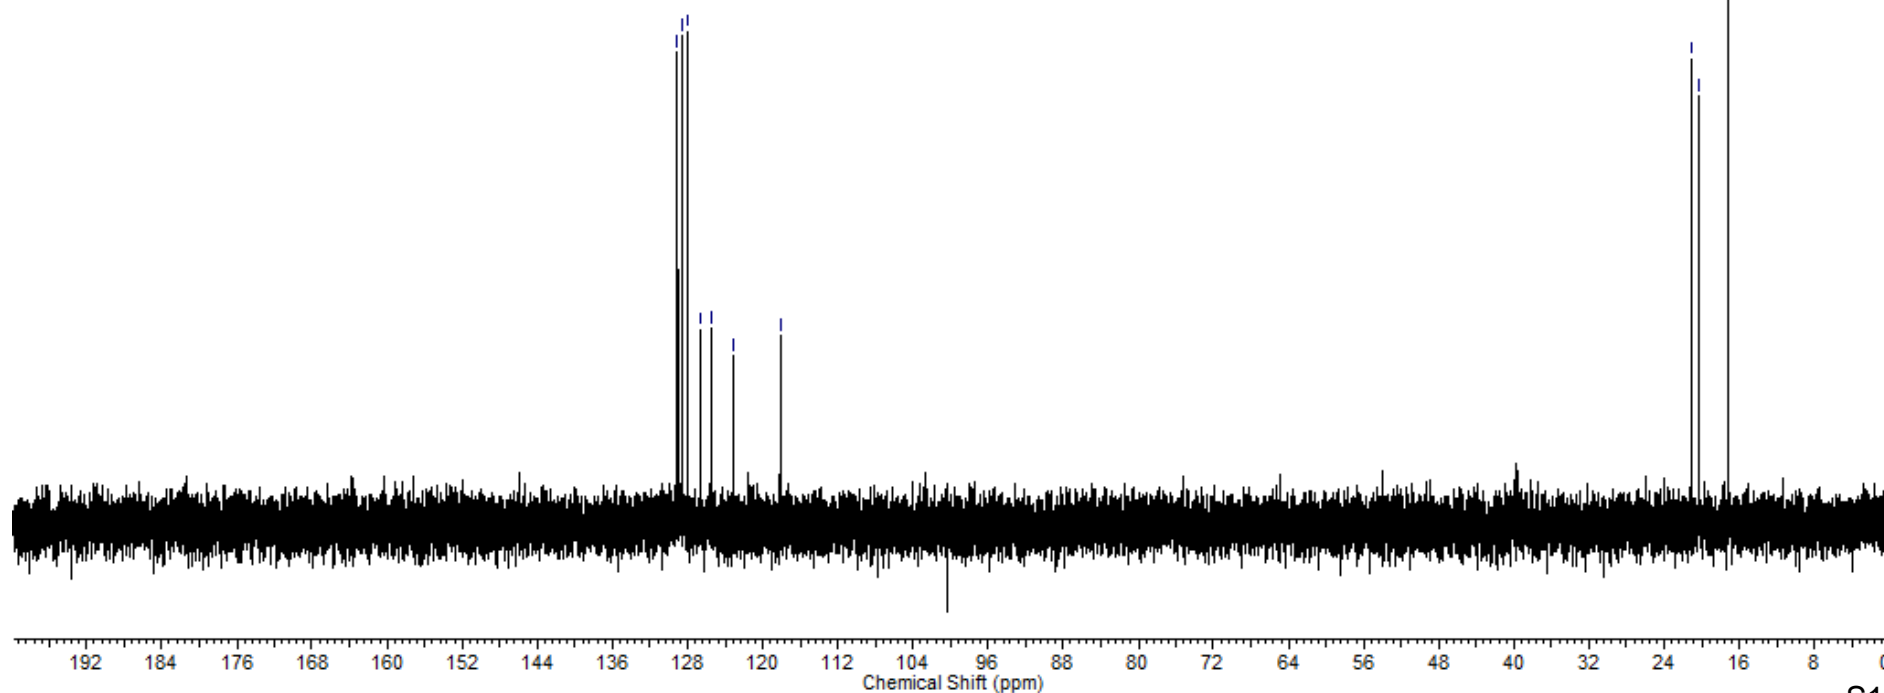

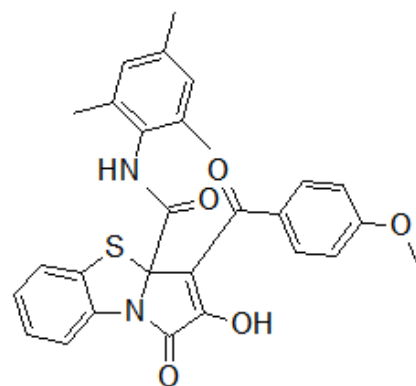 $^1\text{H}$  NMR of **12cb**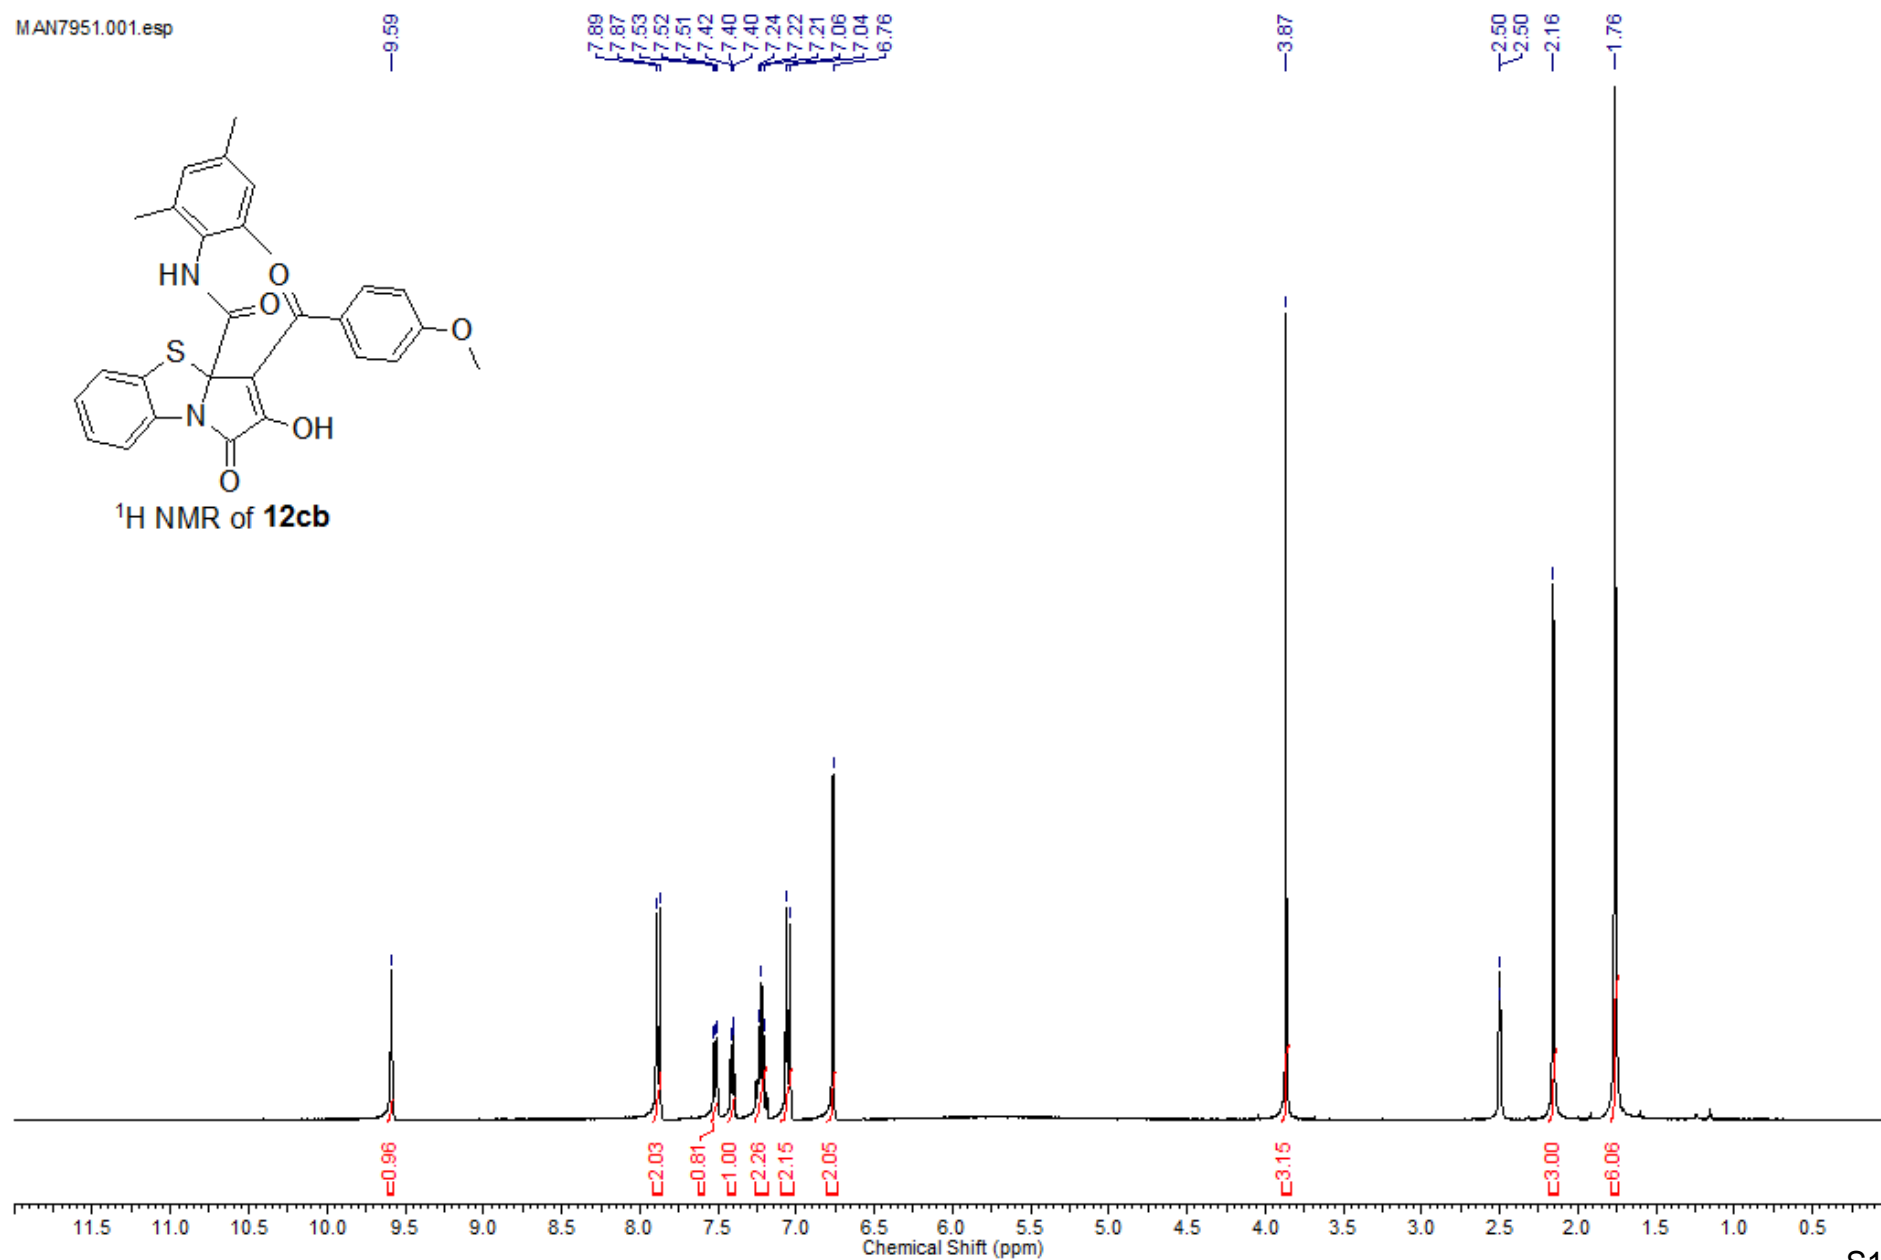

MAN7951.002.esp

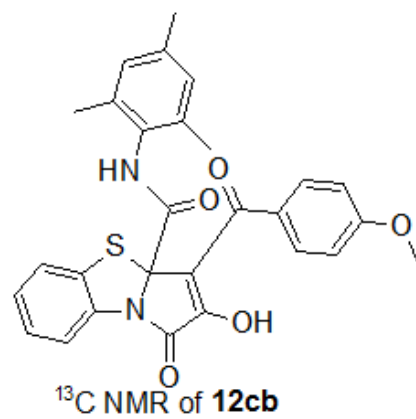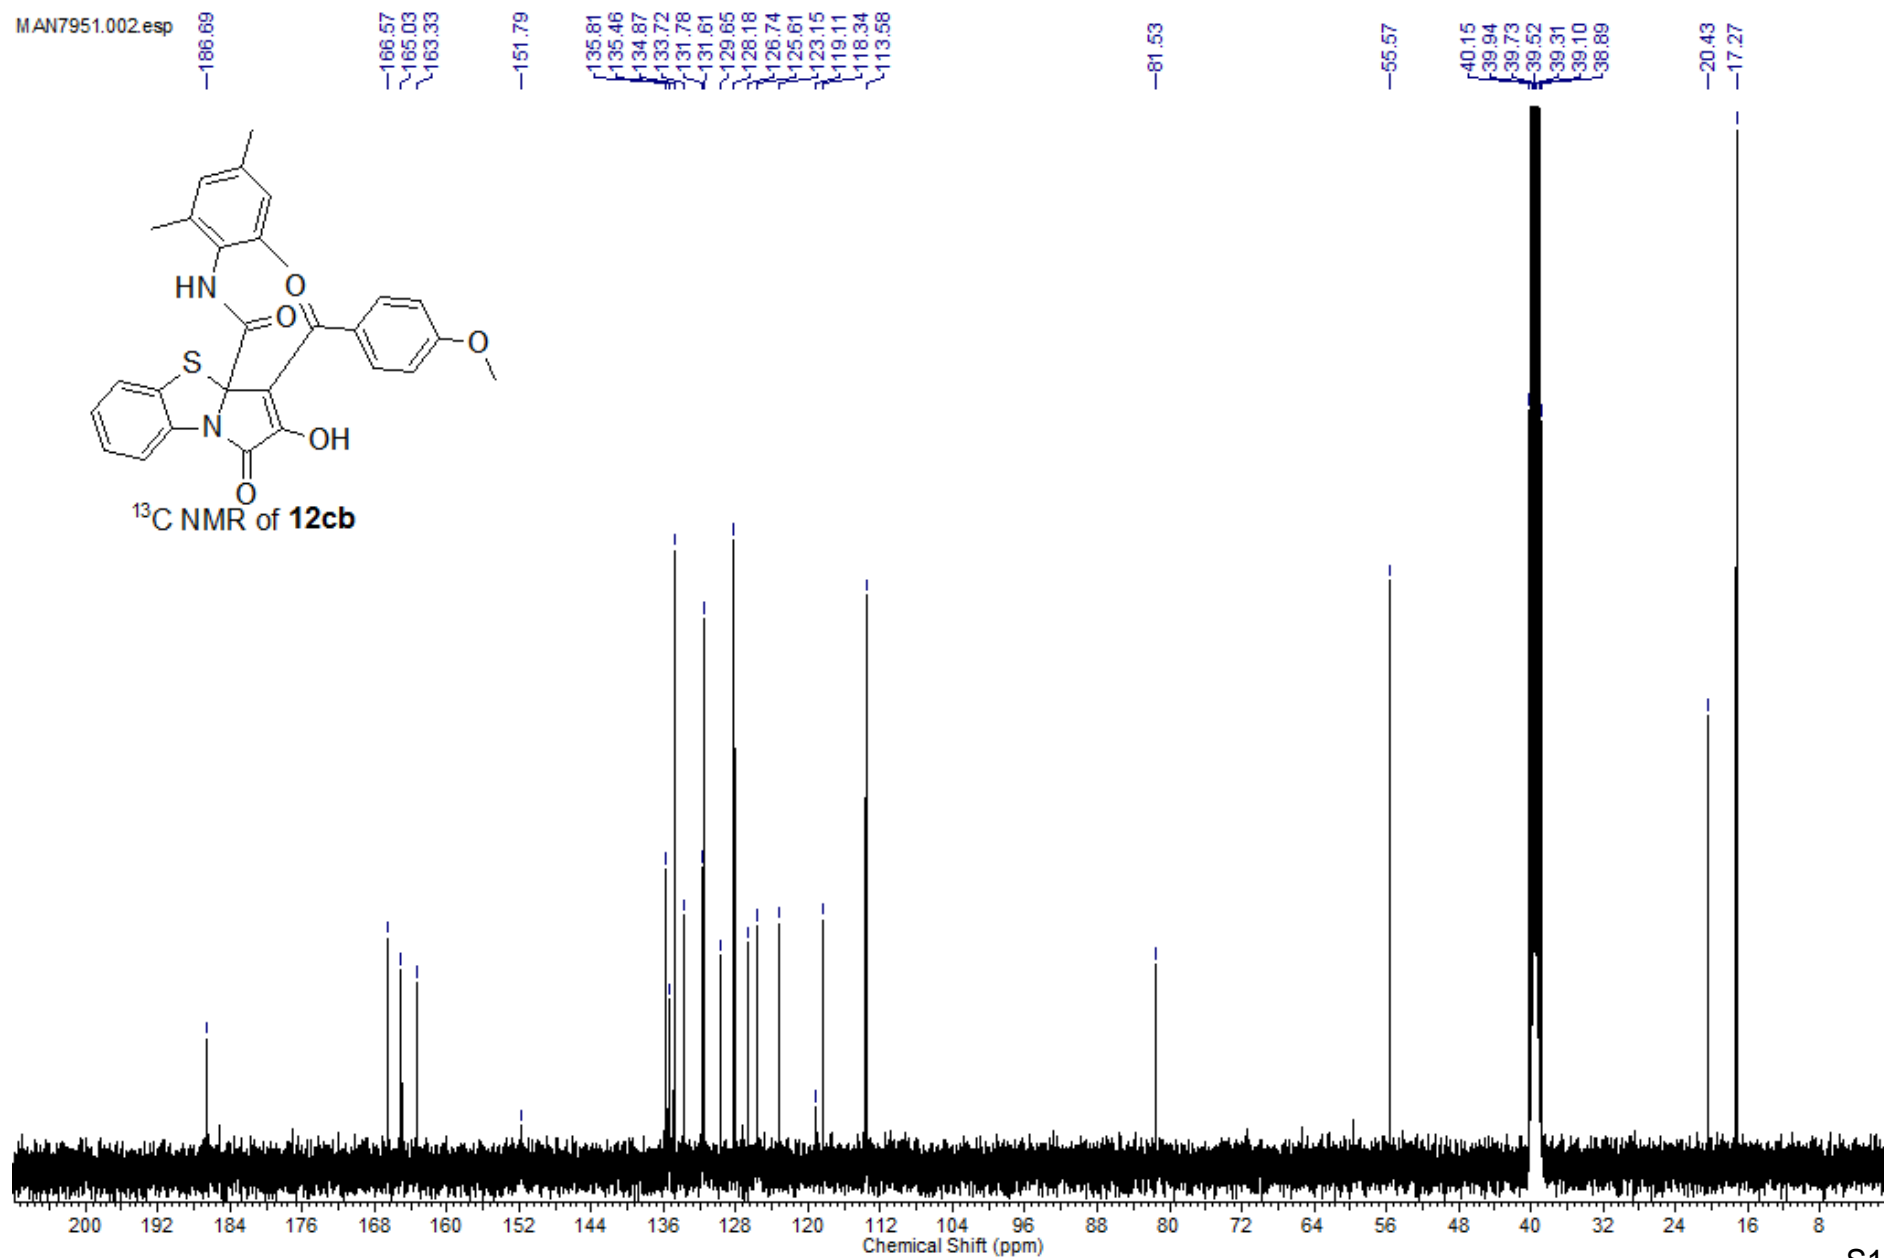

MAN7951.003.esp

131.61  
128.18  
126.74  
125.60  
123.15  
118.34  
113.58

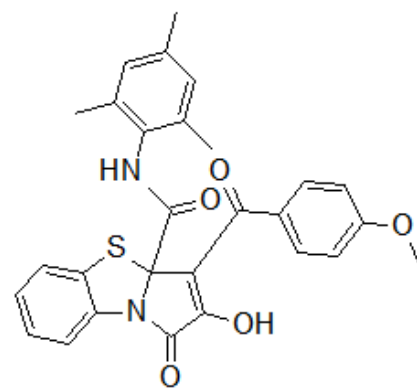

DEPT 135 of 12cb

55.57

20.43  
17.27

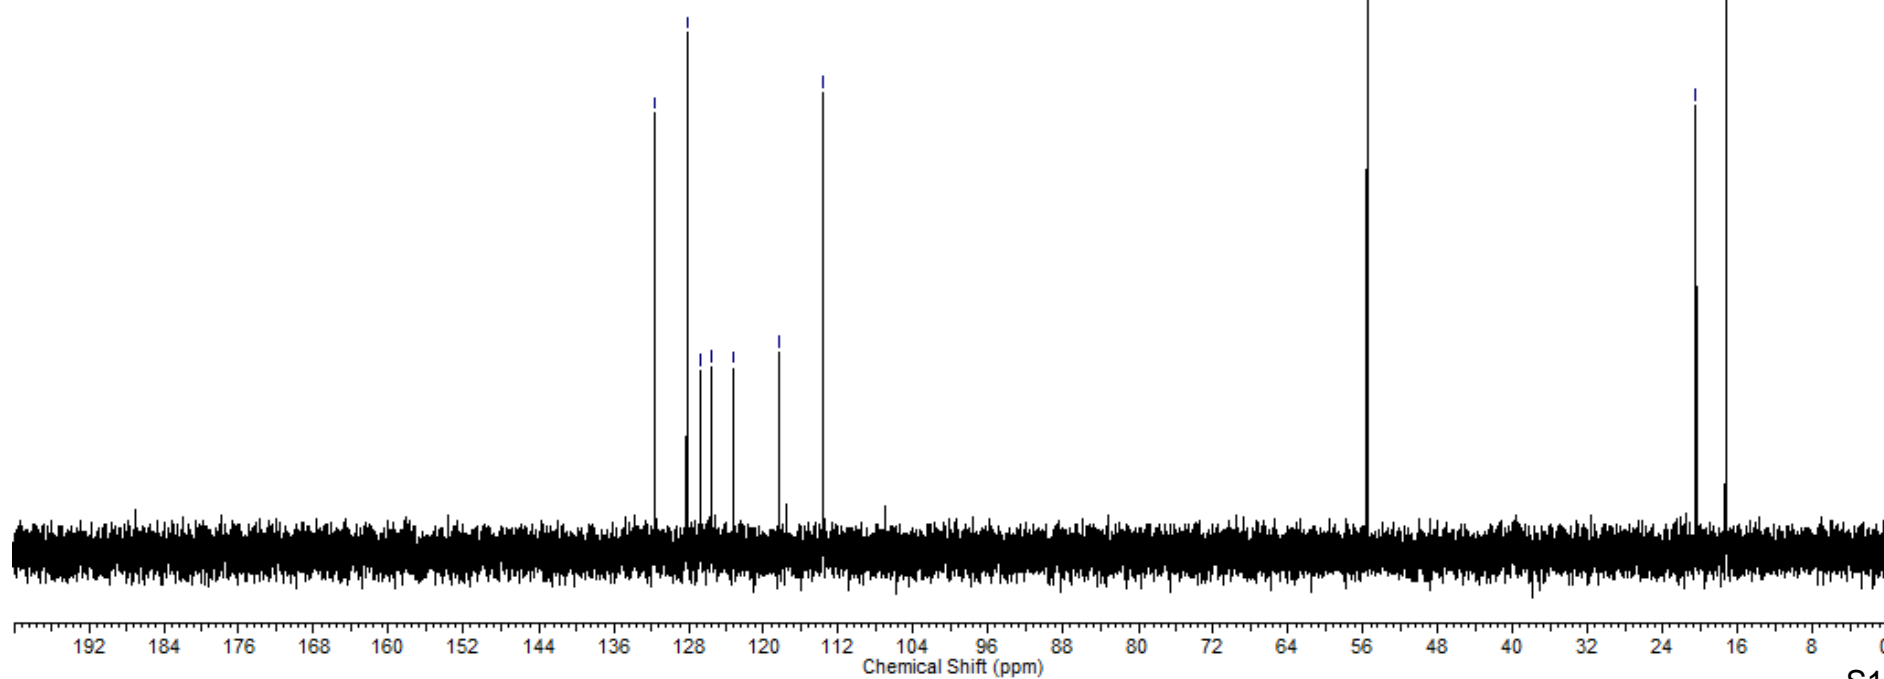





MAN7900.002.esp

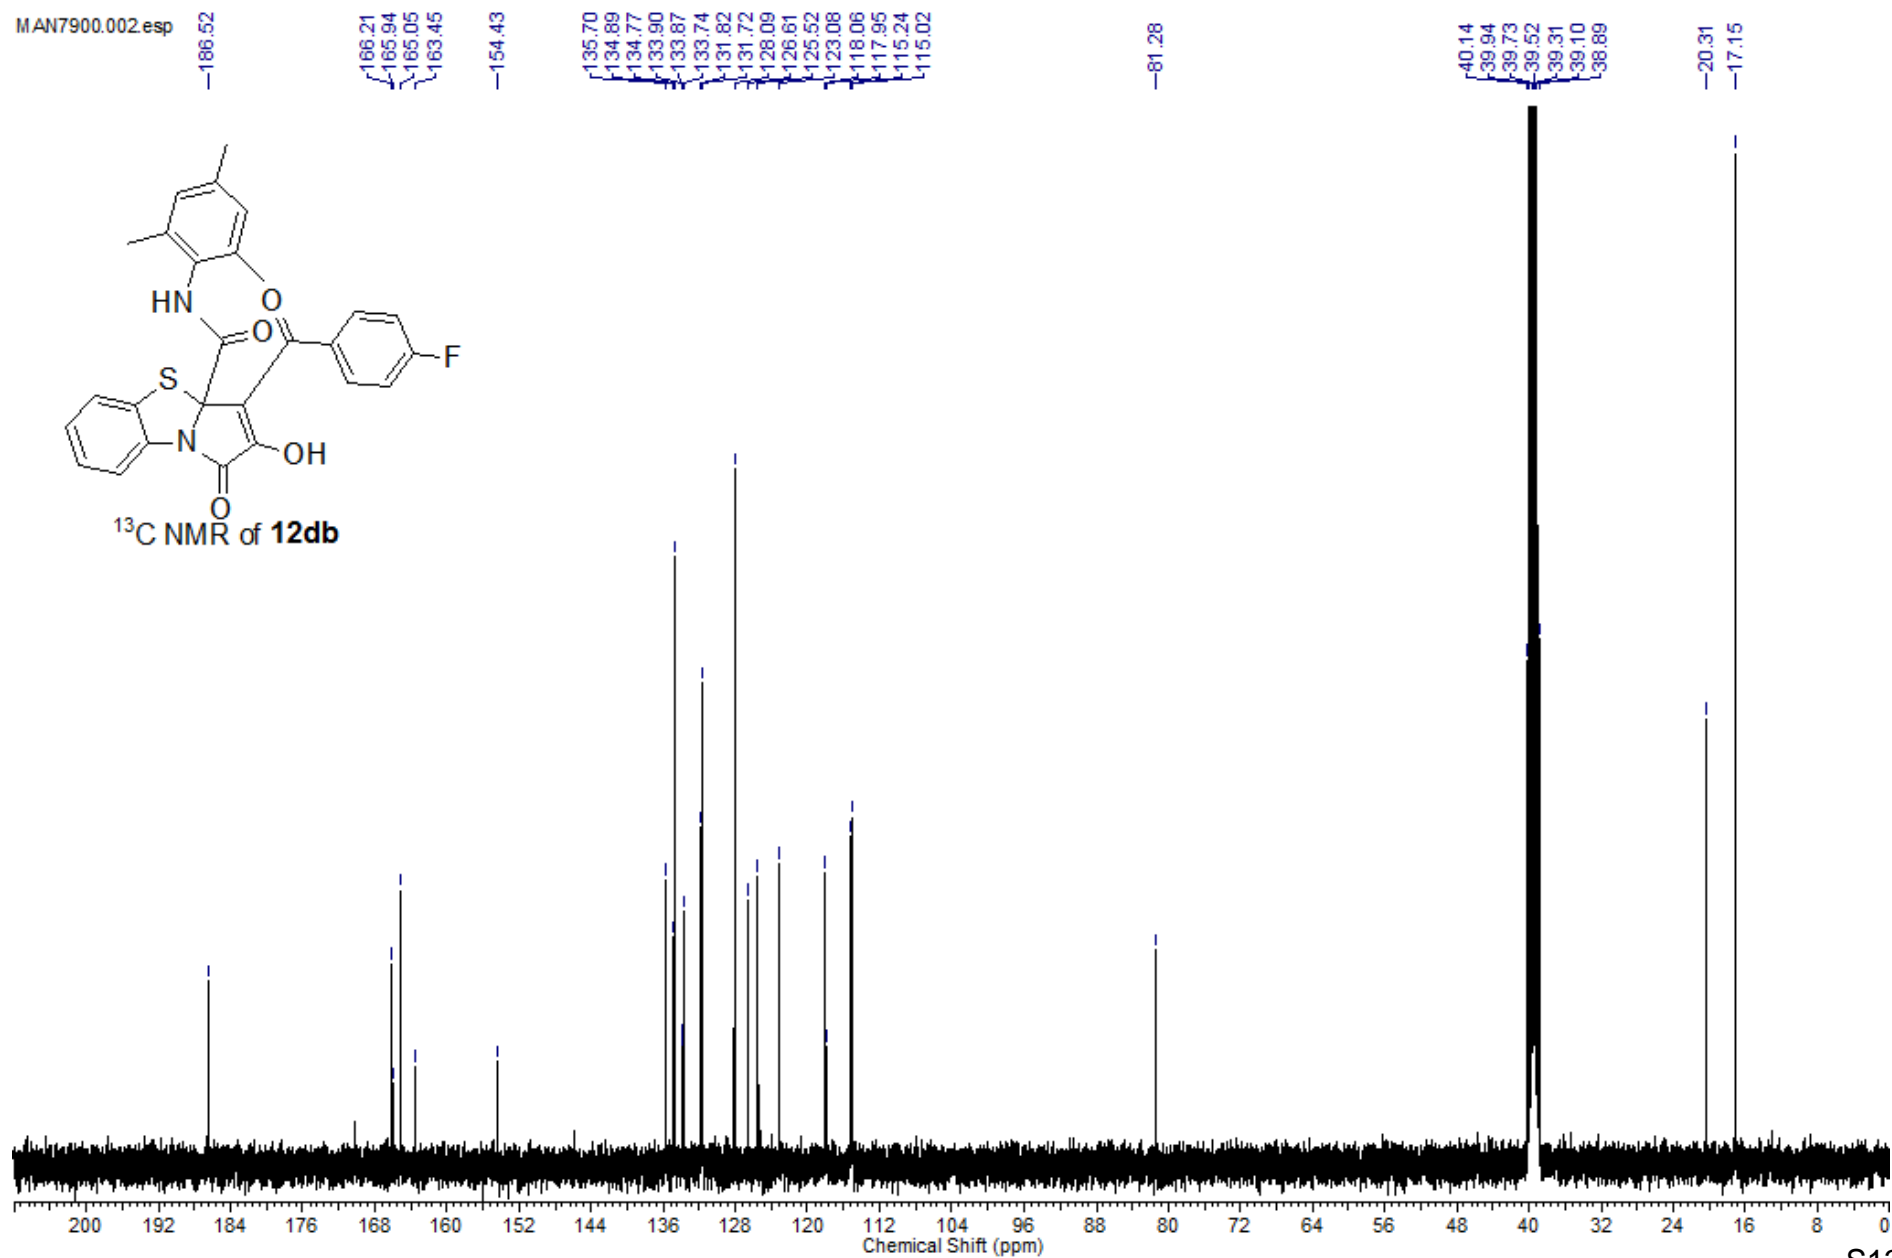

MAN7900.003.esp

131.73  
128.09  
126.61  
125.52  
123.08  
118.06  
115.24  
115.02

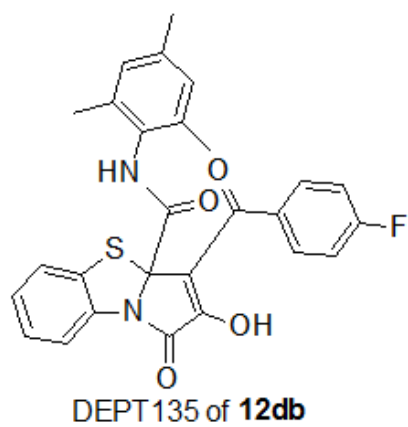

20.31  
17.15

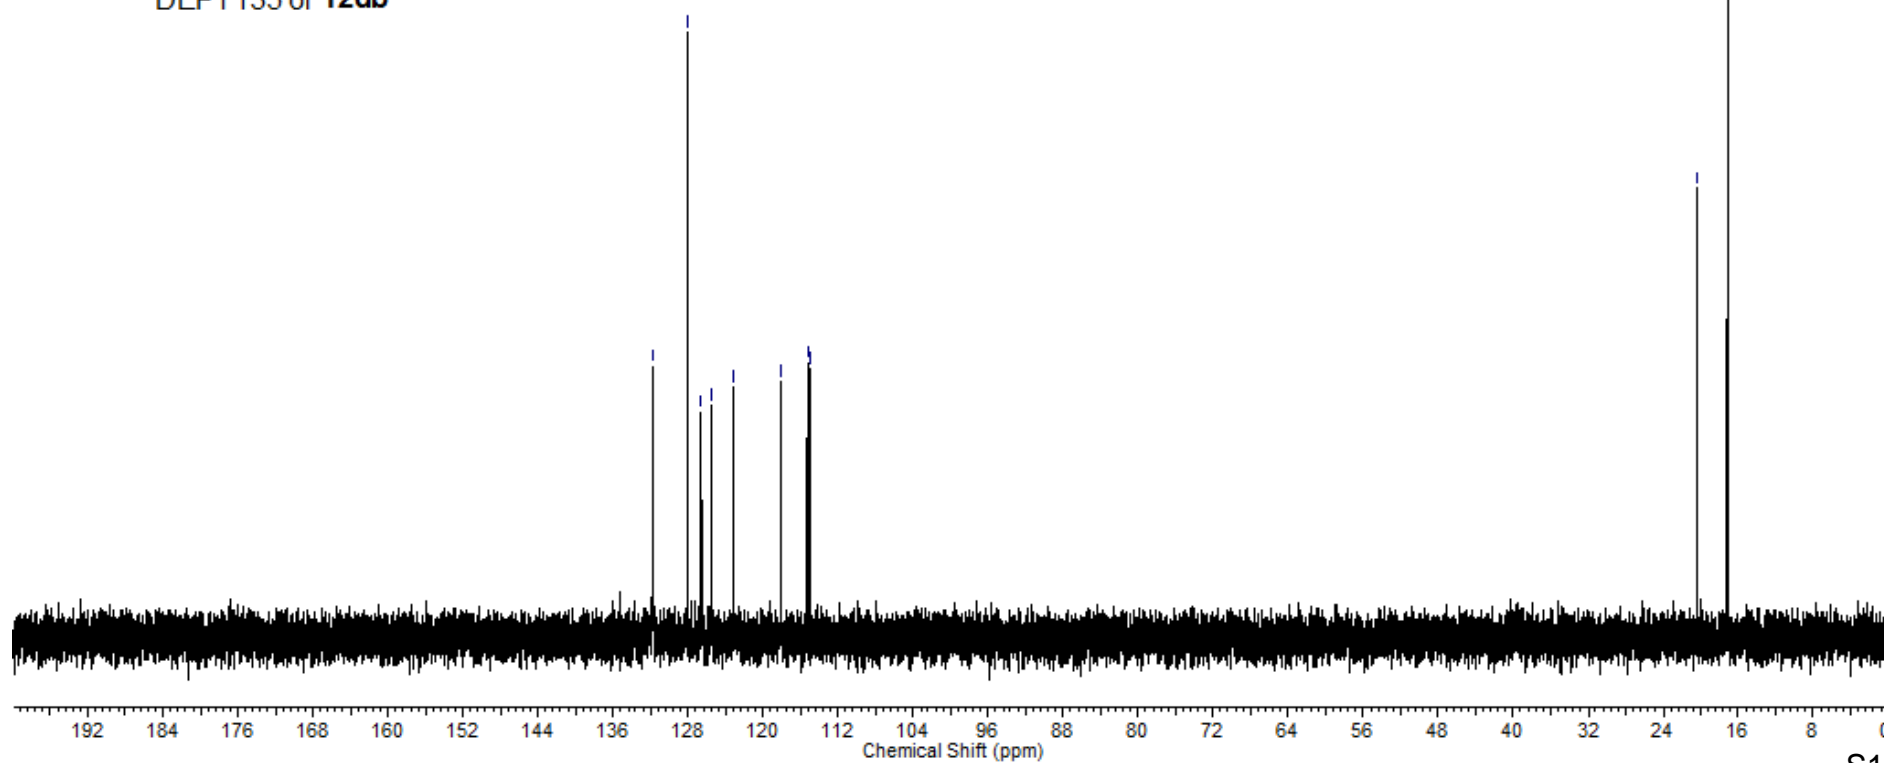

MAN7814.001.esp

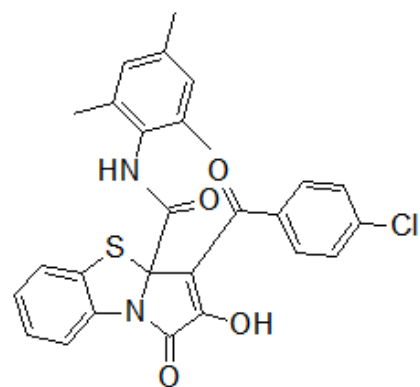

<sup>1</sup>H NMR of 12eb

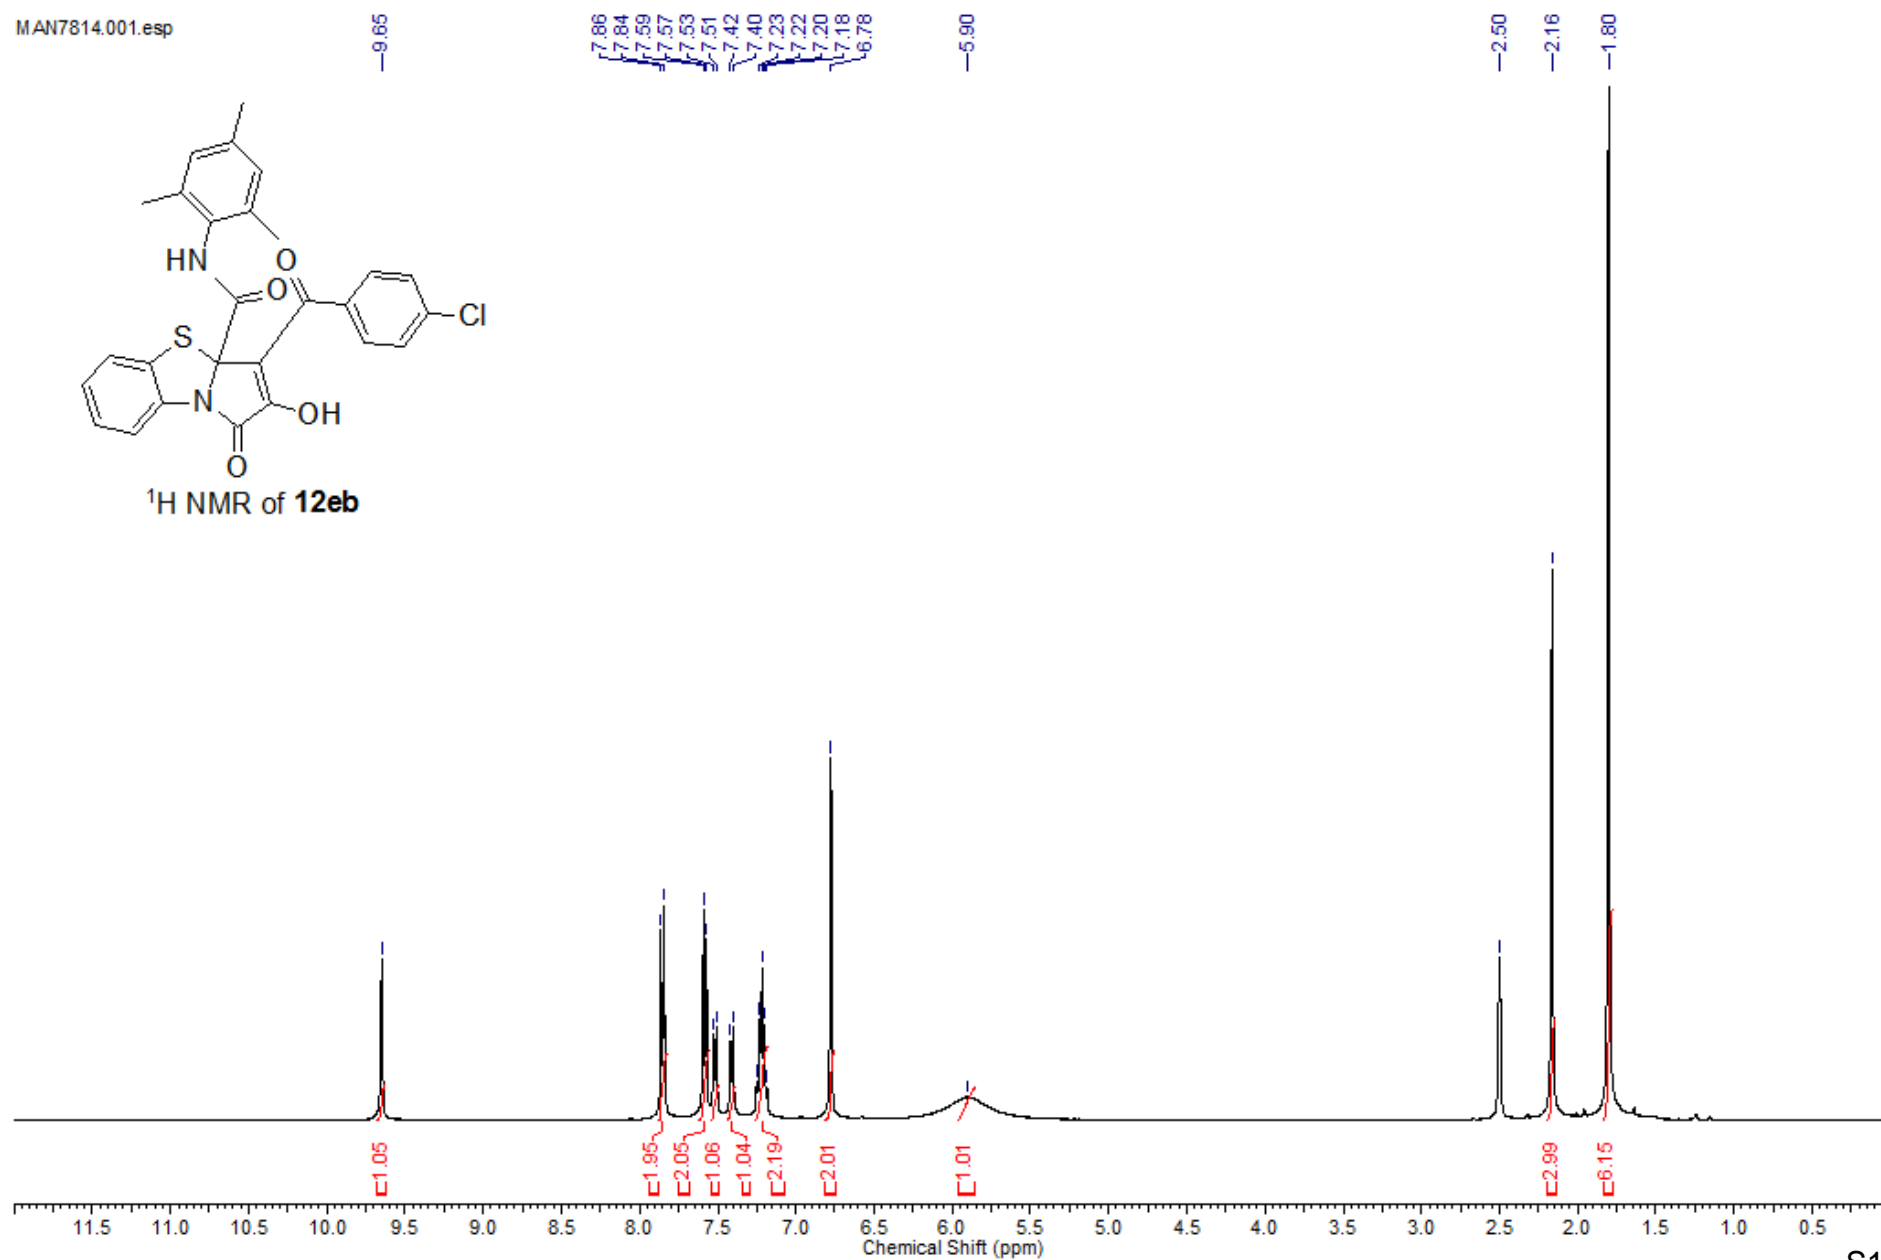

MAN7814.002.esp

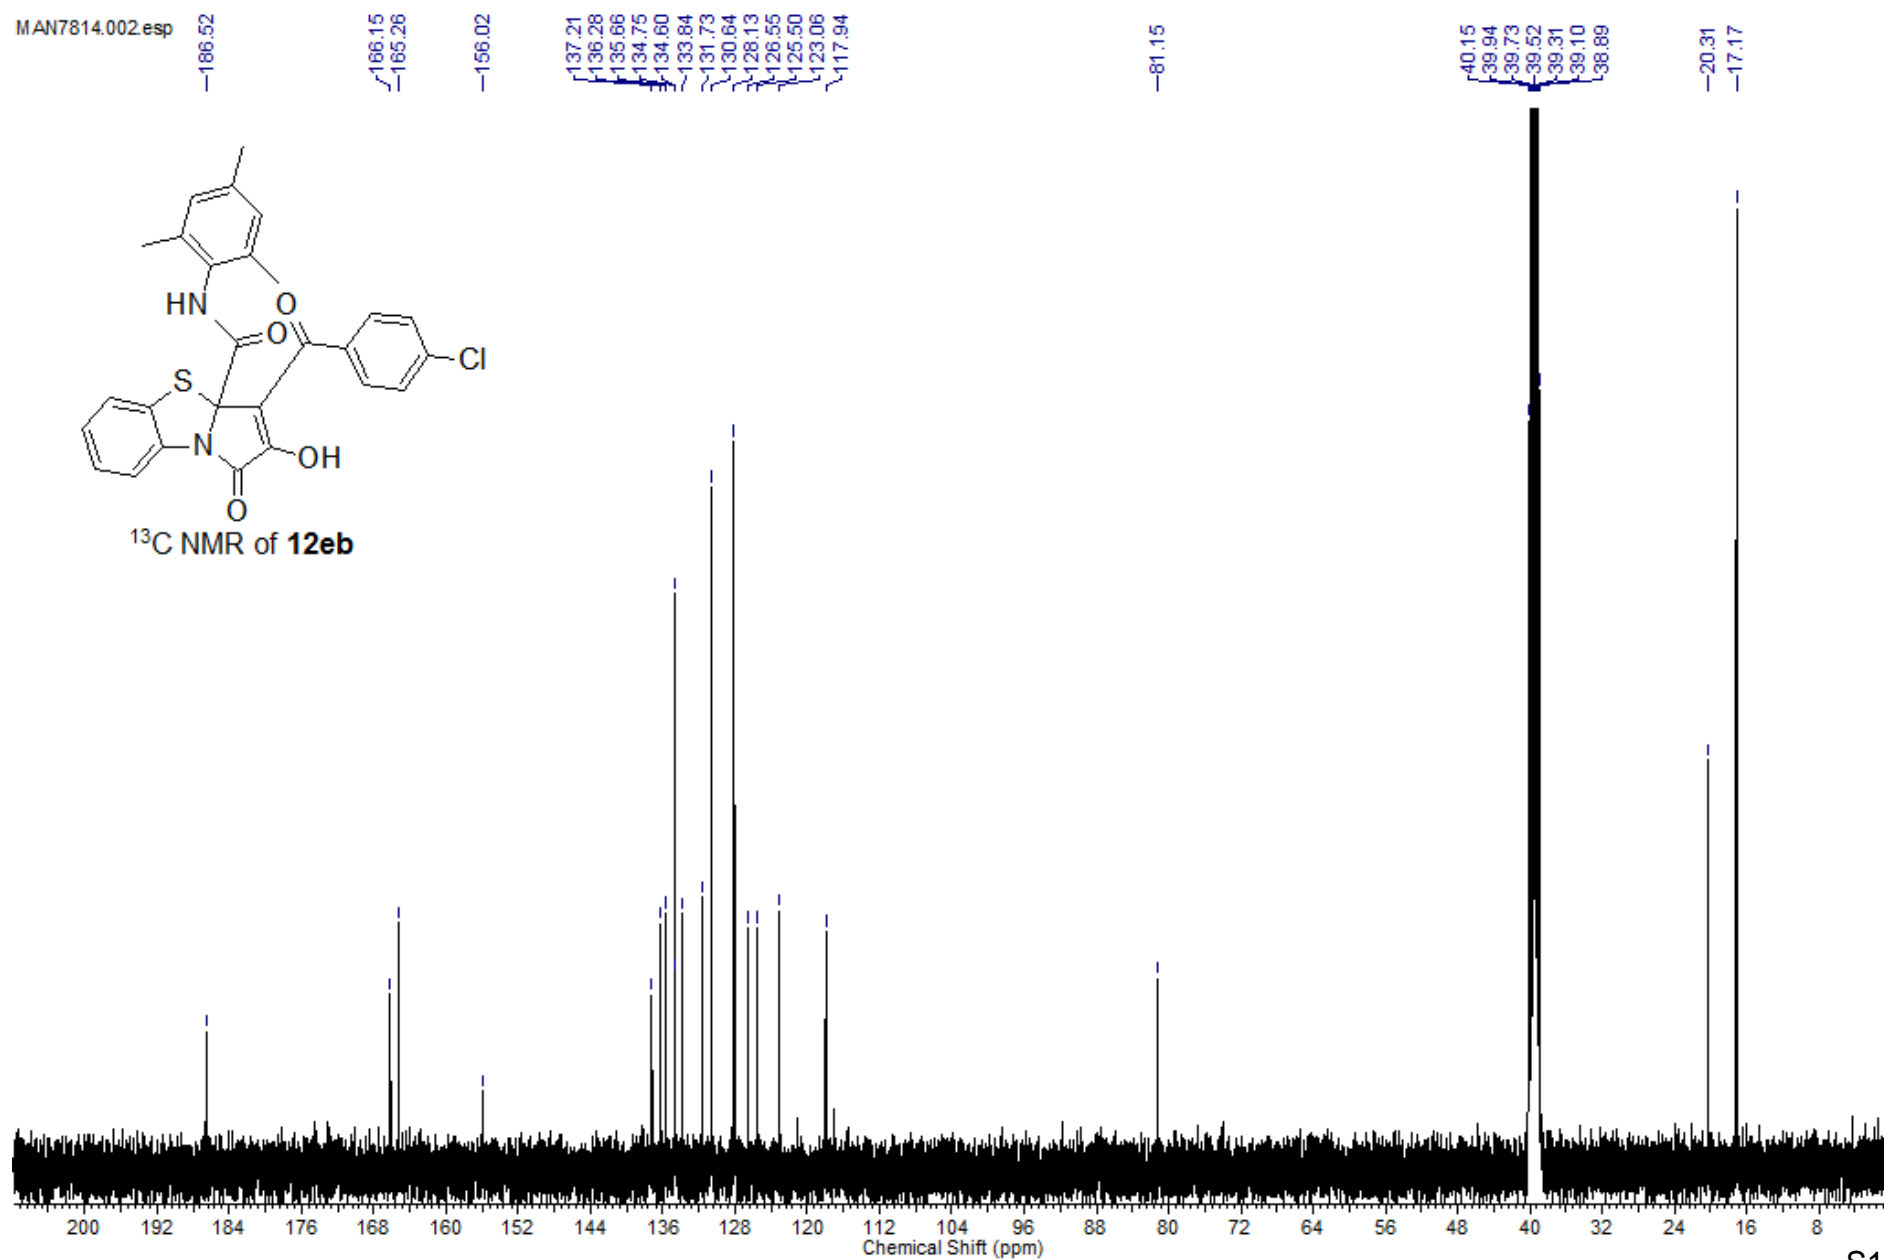

MAN7814.003.esp

130.64  
128.13  
128.09  
126.55  
125.50  
123.06  
117.94

-20.31  
-17.17

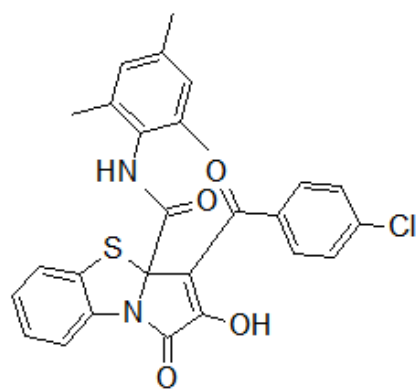

DEPT135 of **12eb**

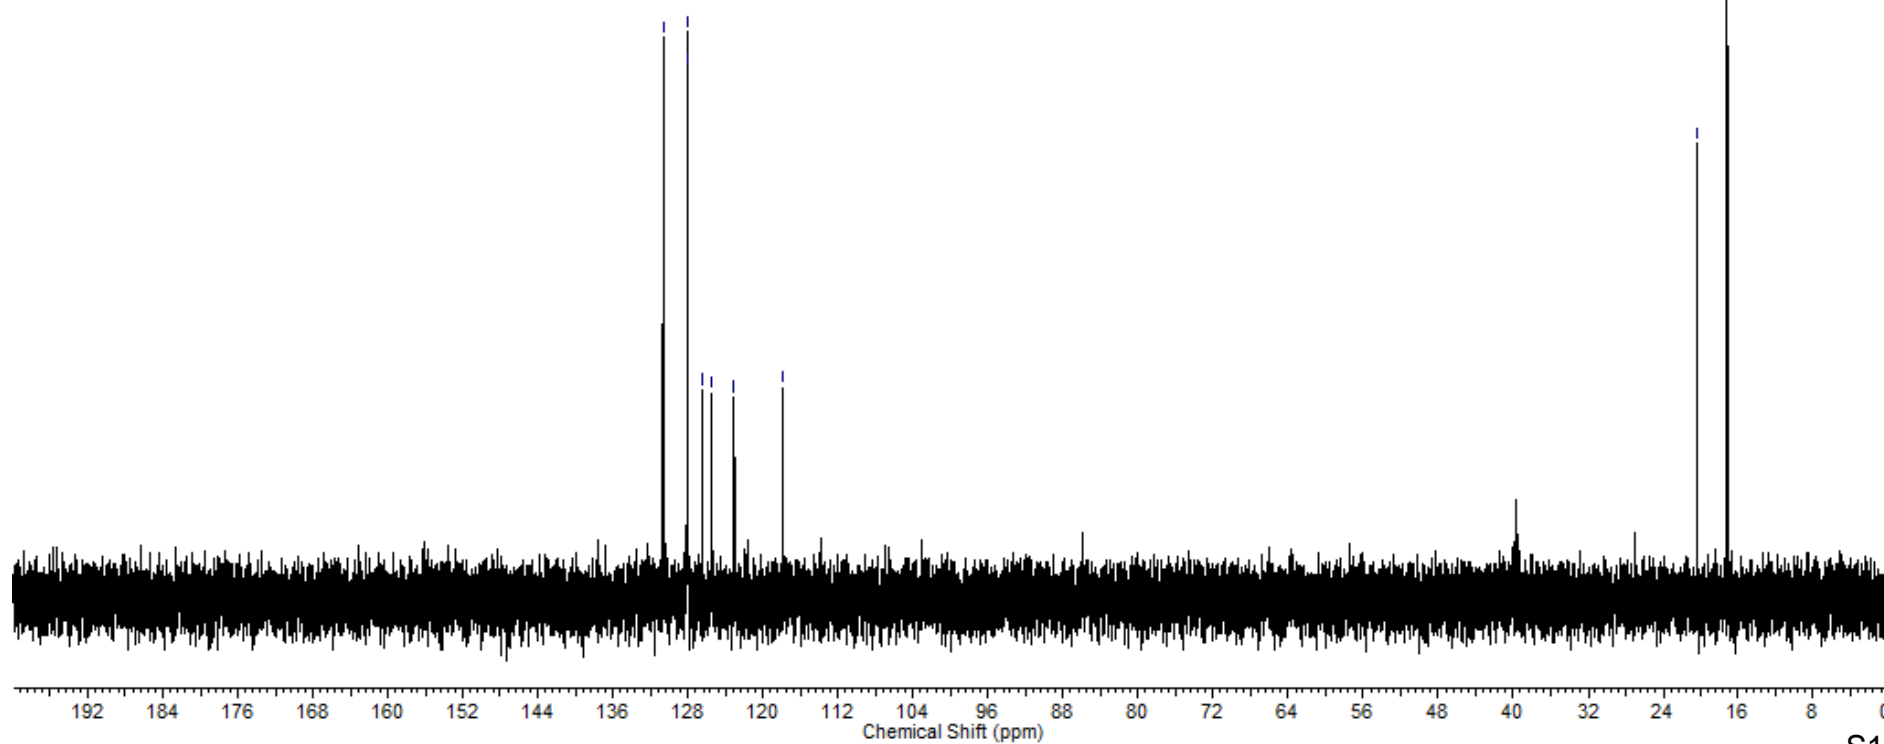

MAN7896.001.esp

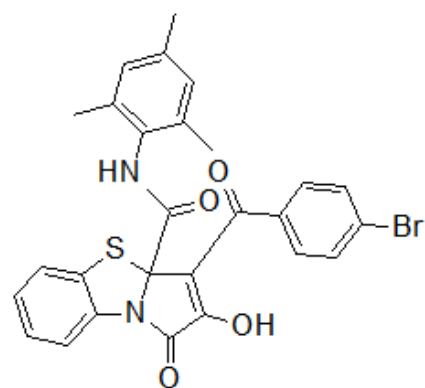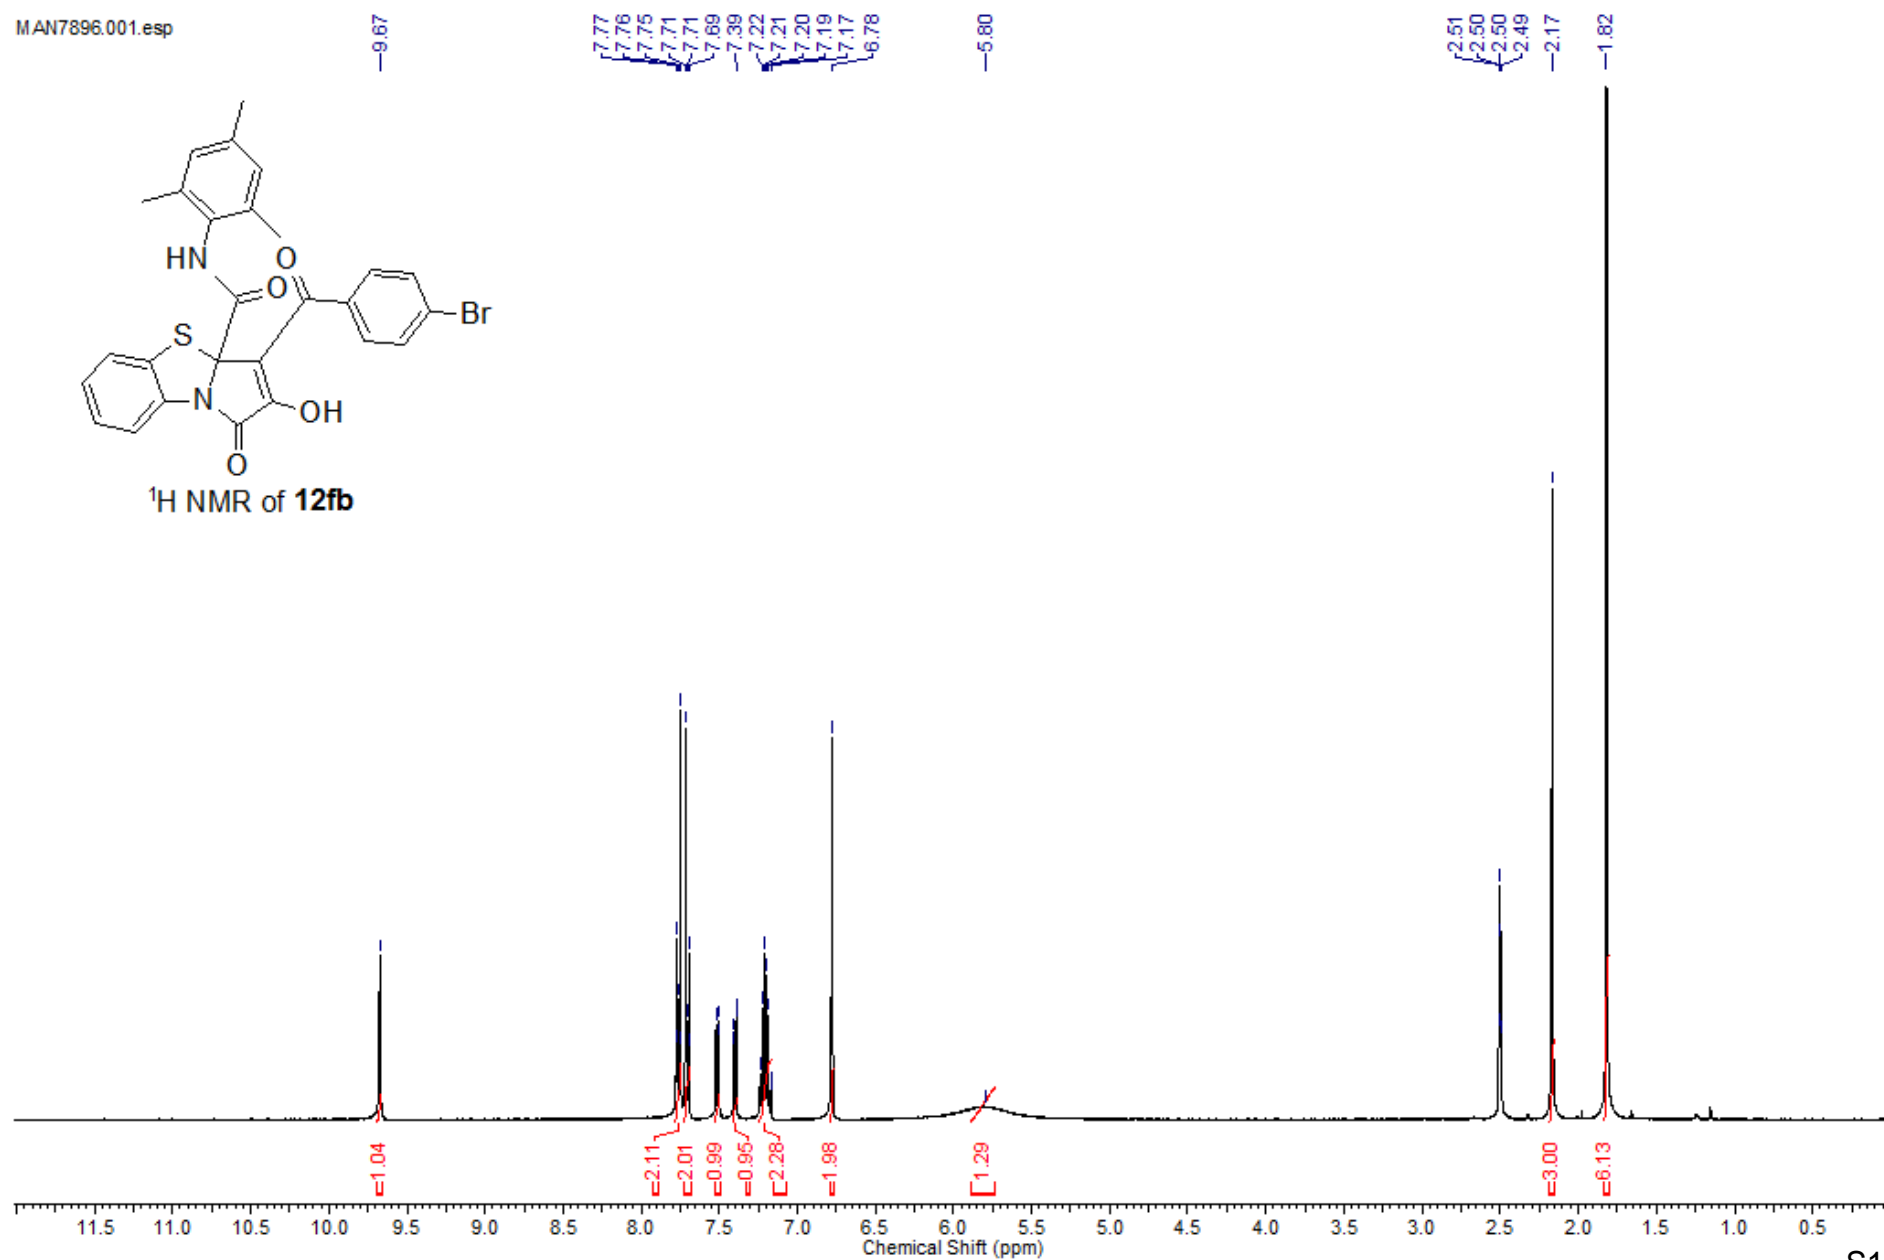

MAN7896.002.esp

166.96

166.30

165.18

155.58

136.56

135.80

134.85

133.79

131.81

131.24

130.89

128.21

126.75

126.56

125.64

123.22

118.12

117.50

81.33

40.14

39.94

39.73

39.52

39.31

39.10

38.90

20.44

17.30

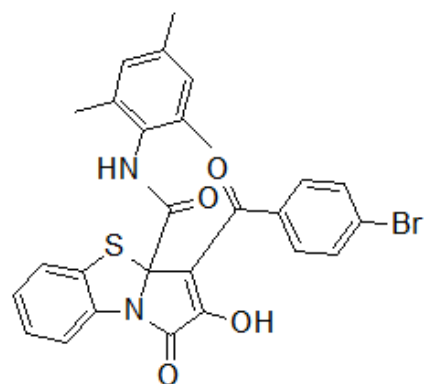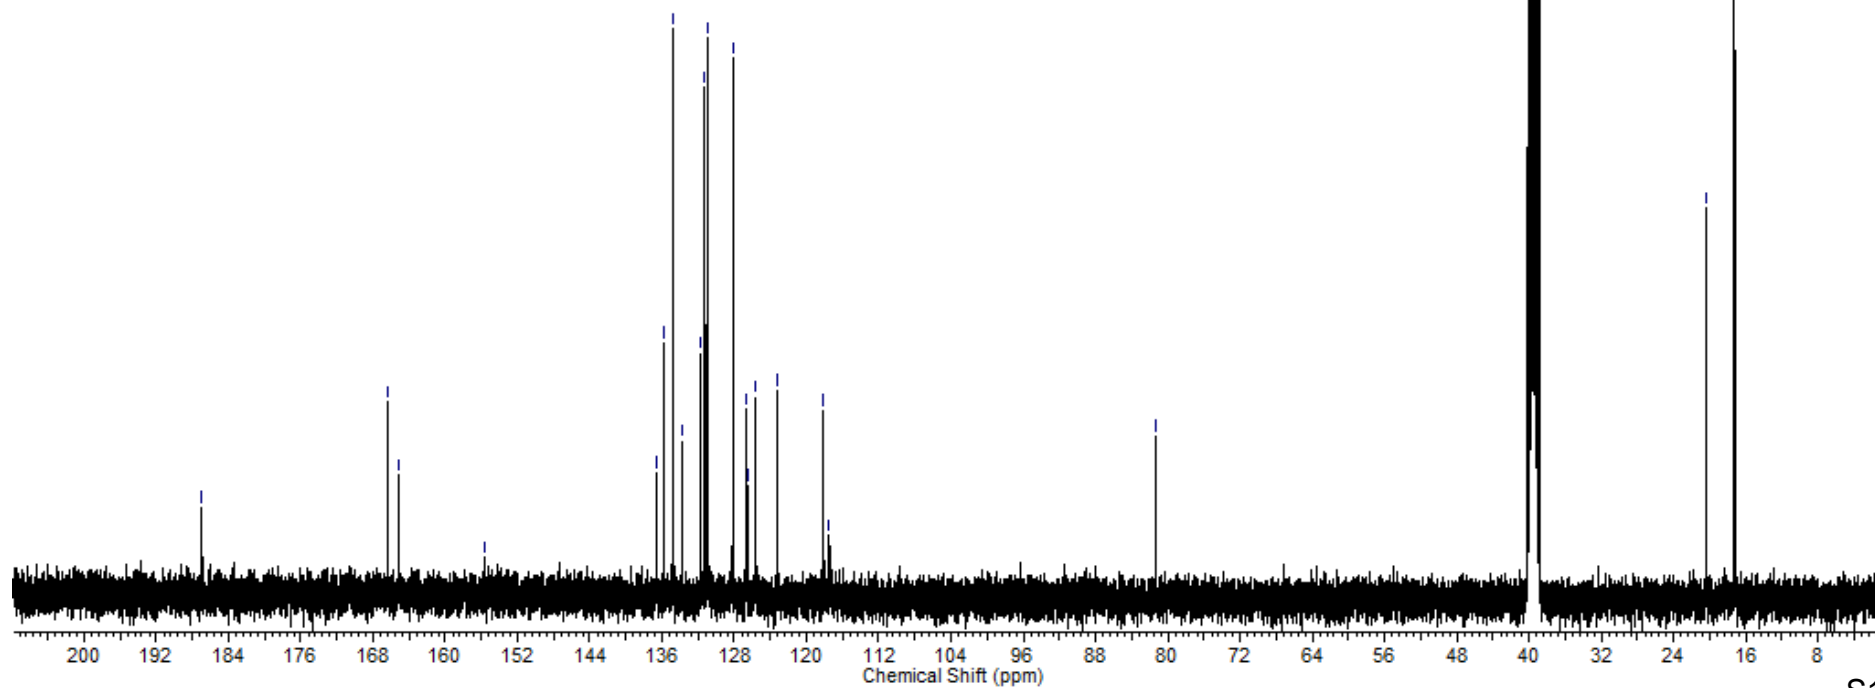

MAN7896.003.esp

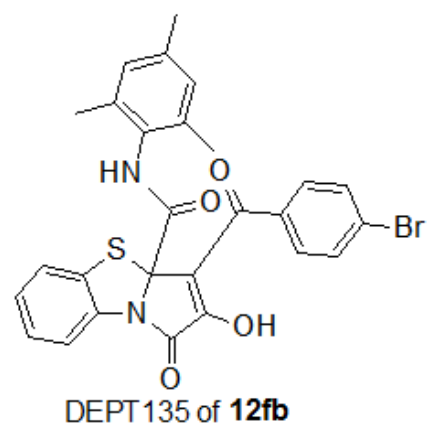

131.24  
130.89  
128.21  
126.75  
125.64  
123.22  
118.12

20.44  
17.30

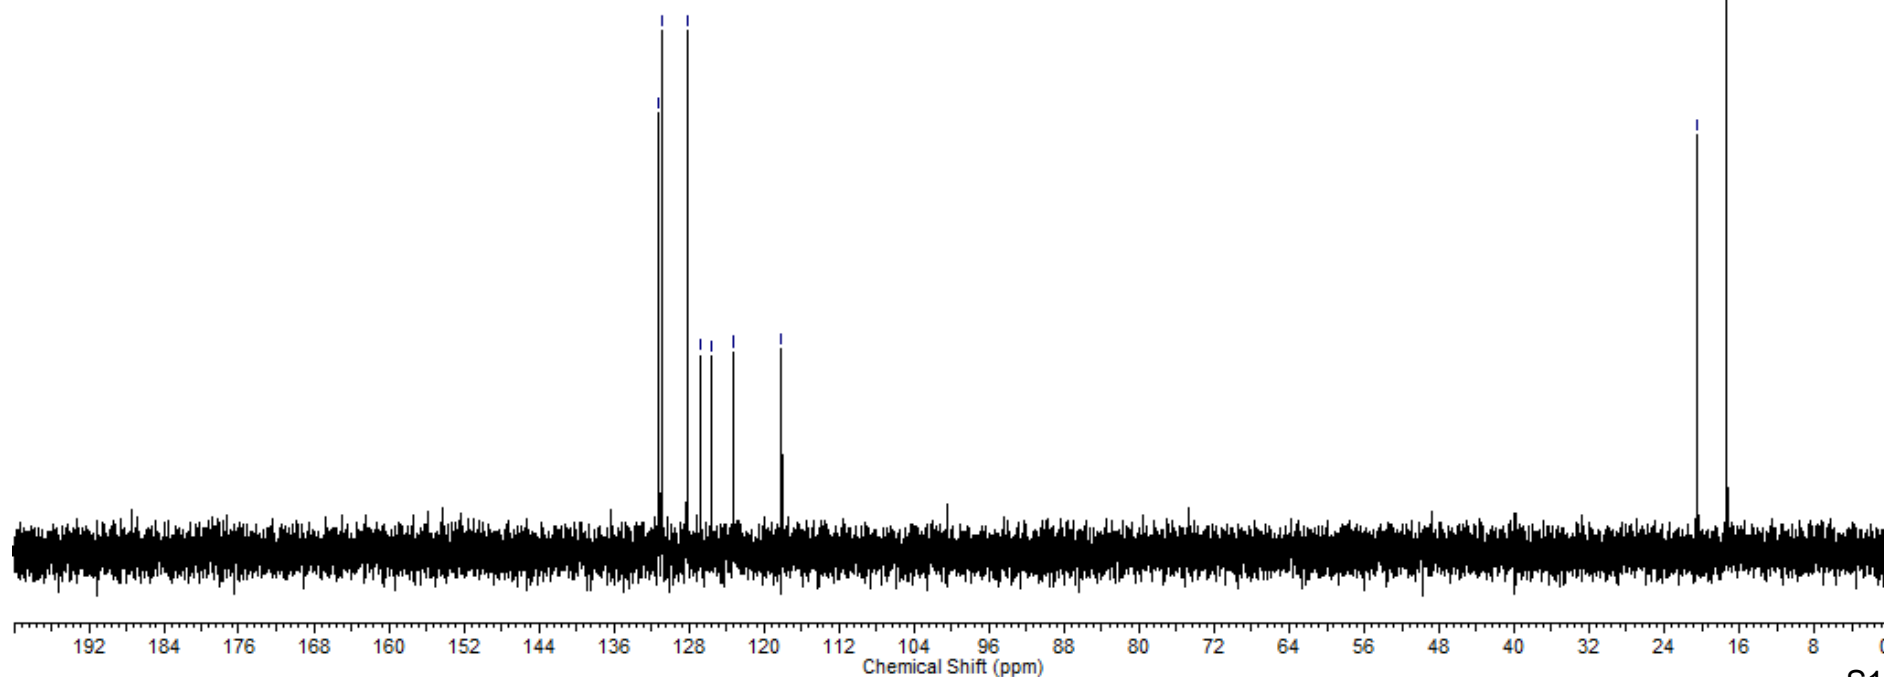



MAN7877.001.esp

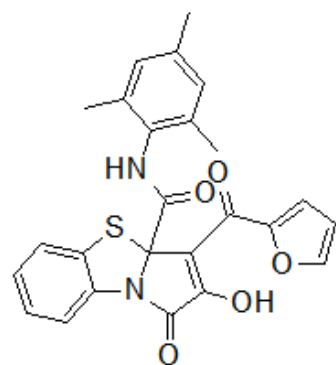

<sup>1</sup>H NMR of 12gb

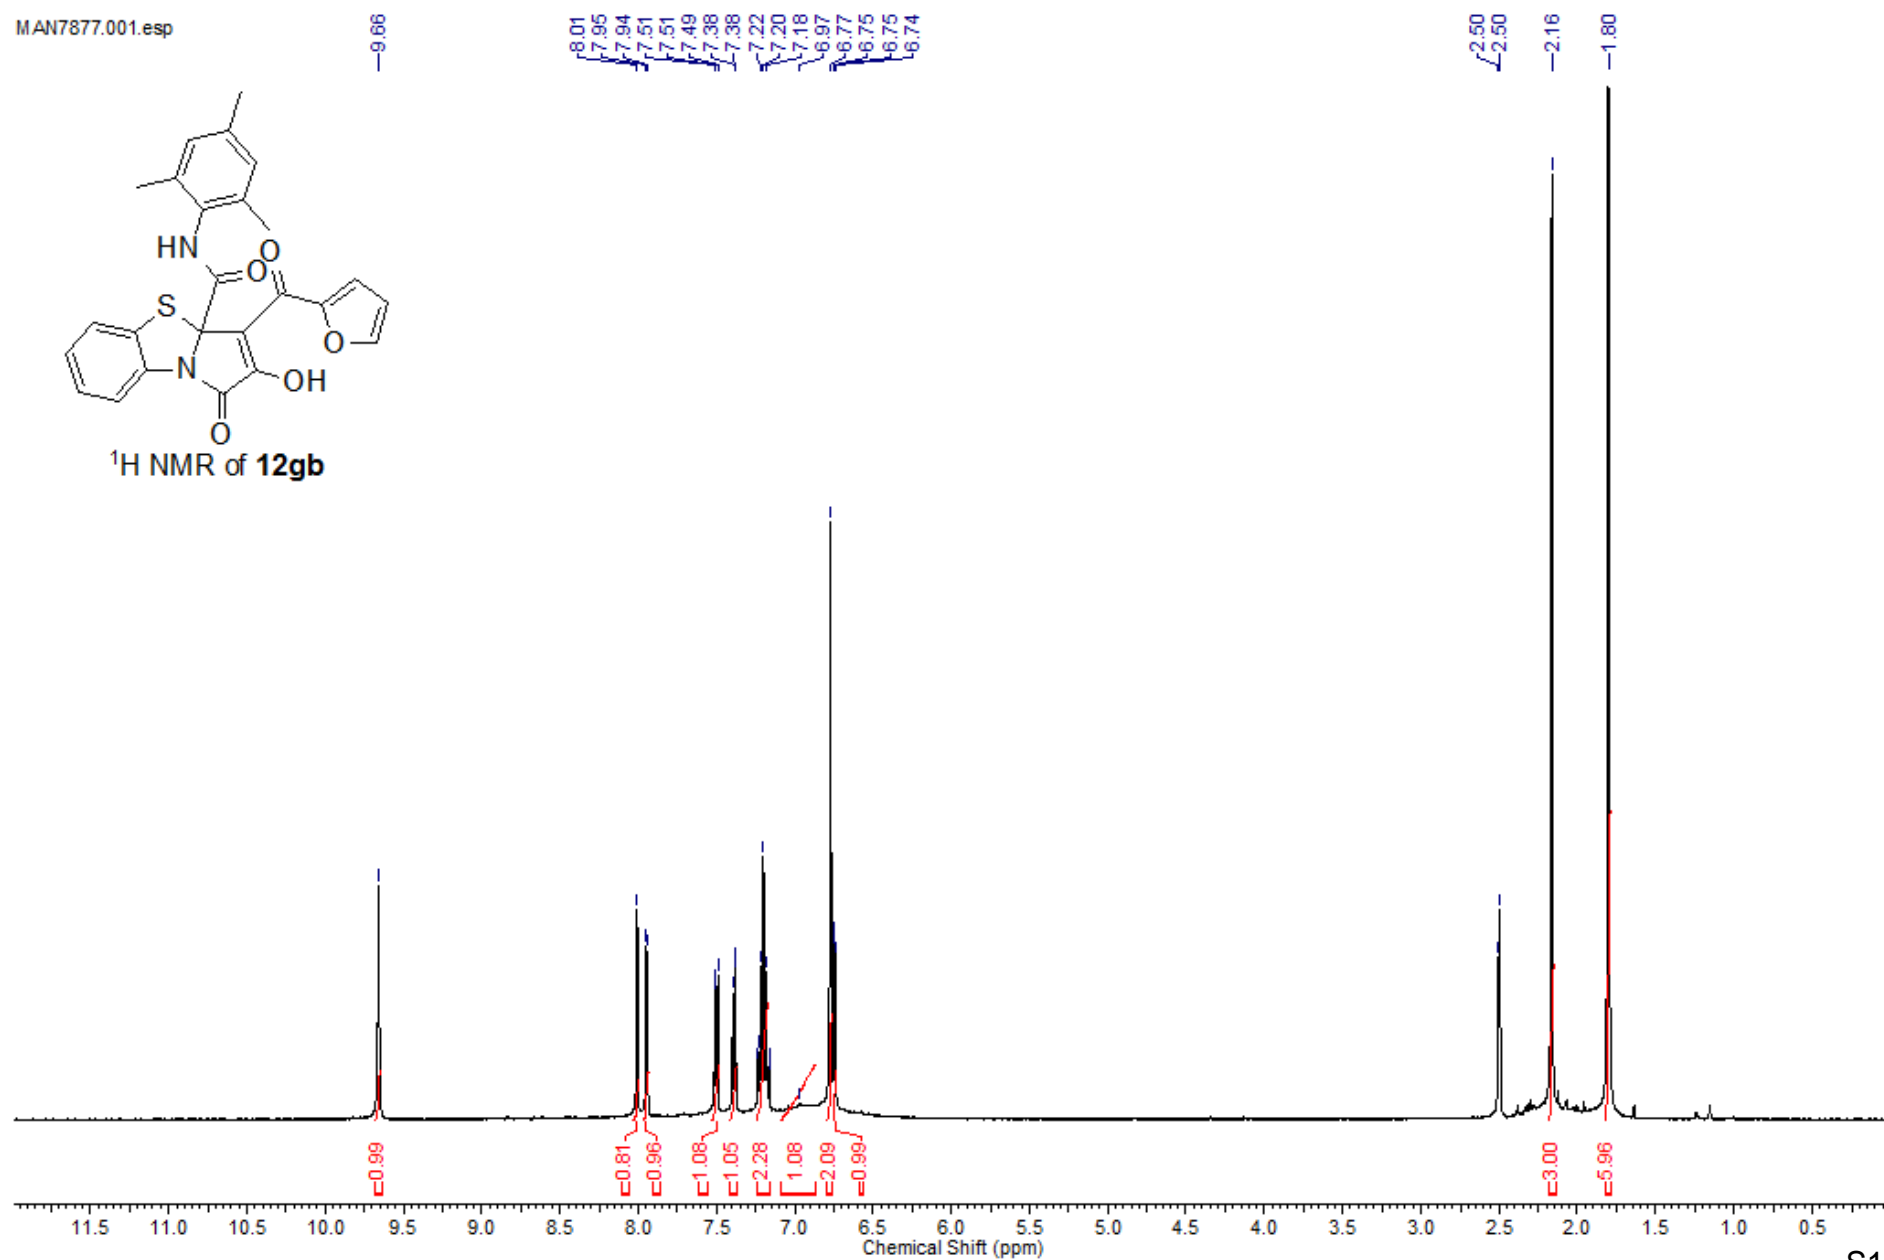

MAN7877.002.esp

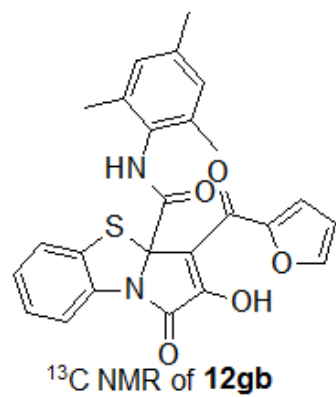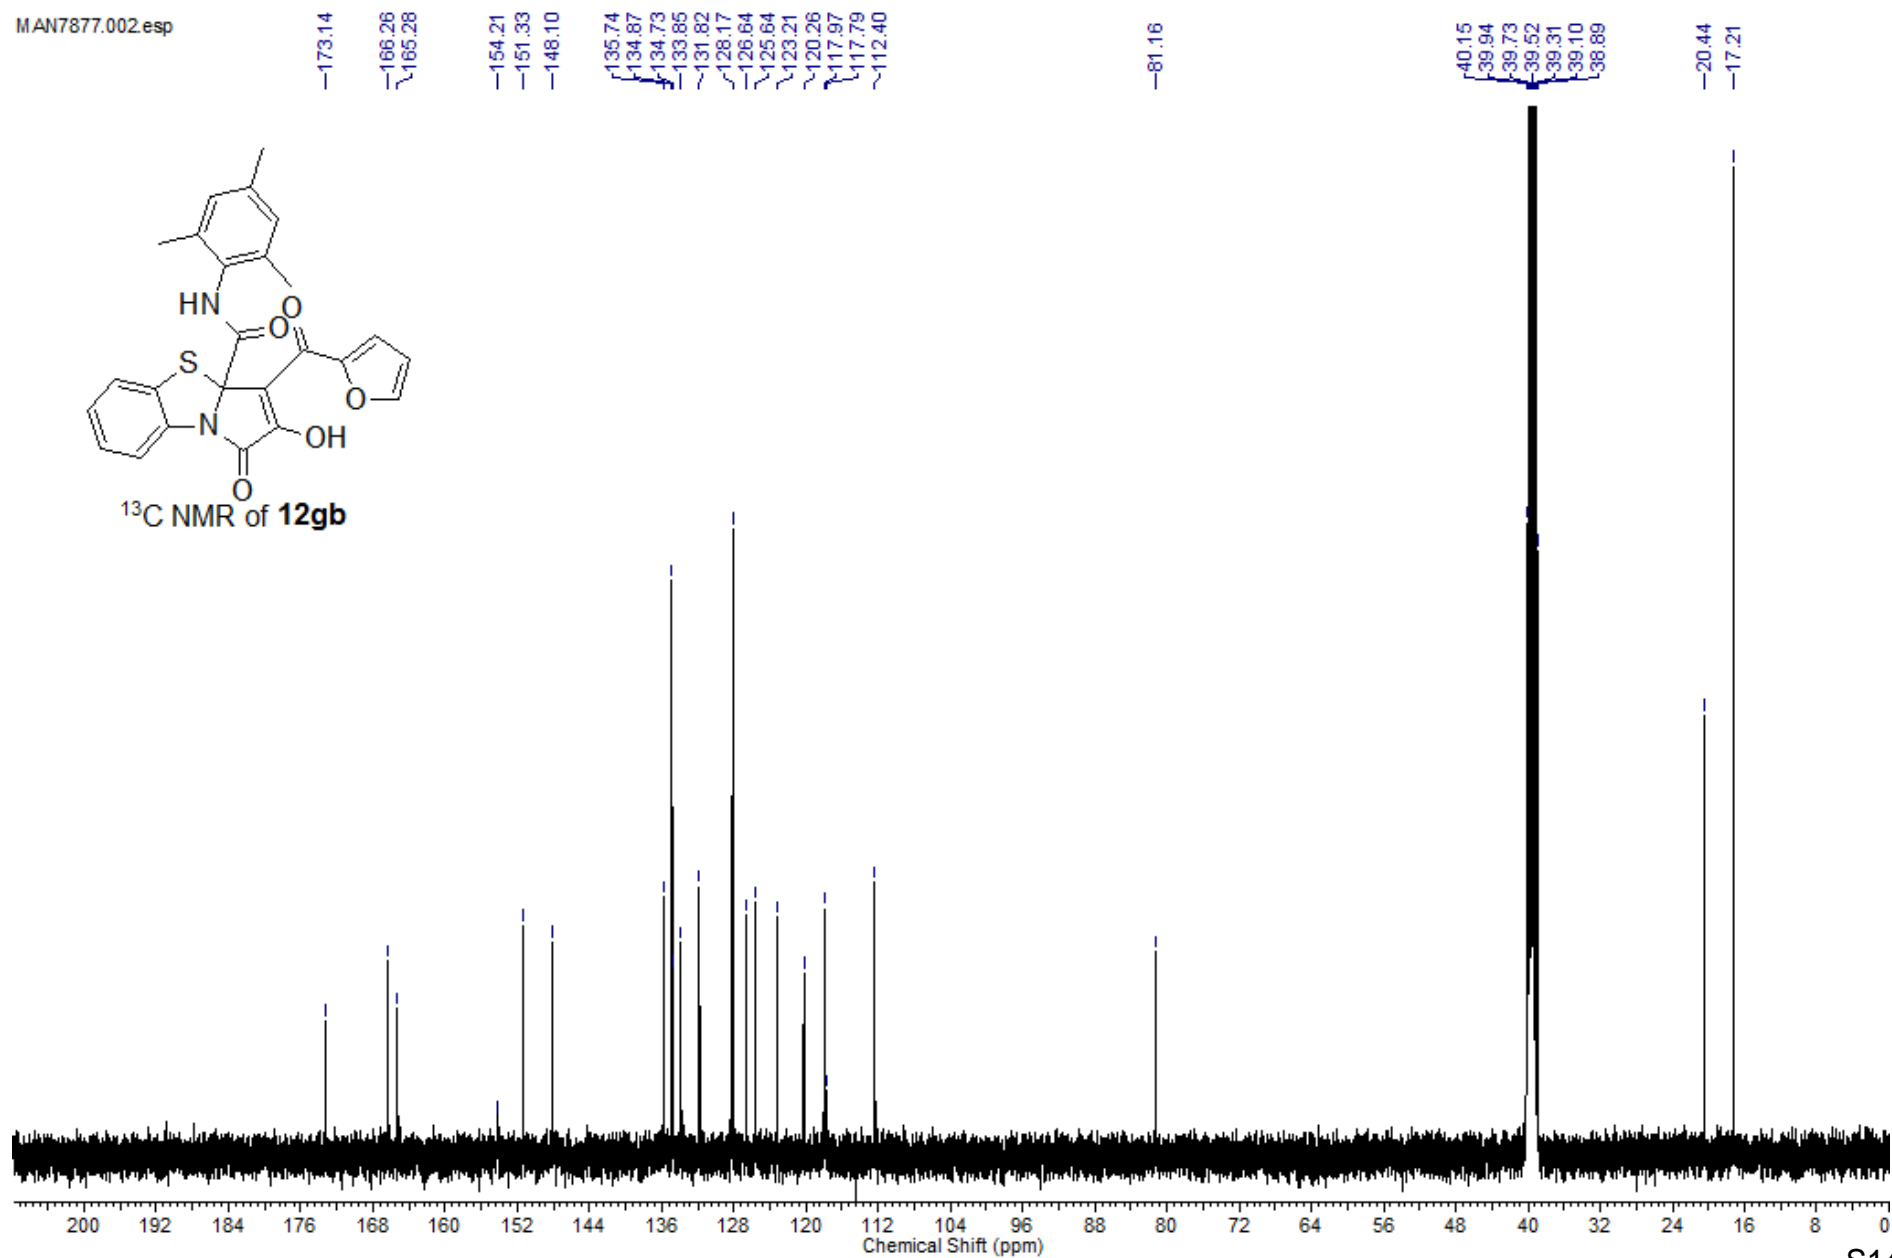

MAN7877.003.esp

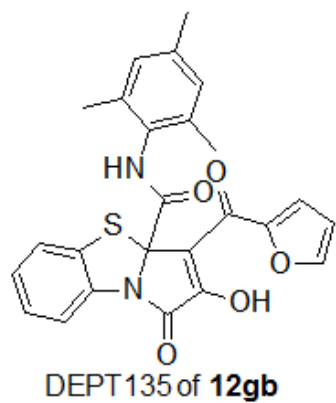

—148.10

~128.17

~126.64

~125.64

~123.20

~120.26

~117.97

—112.40

—20.43

—17.21

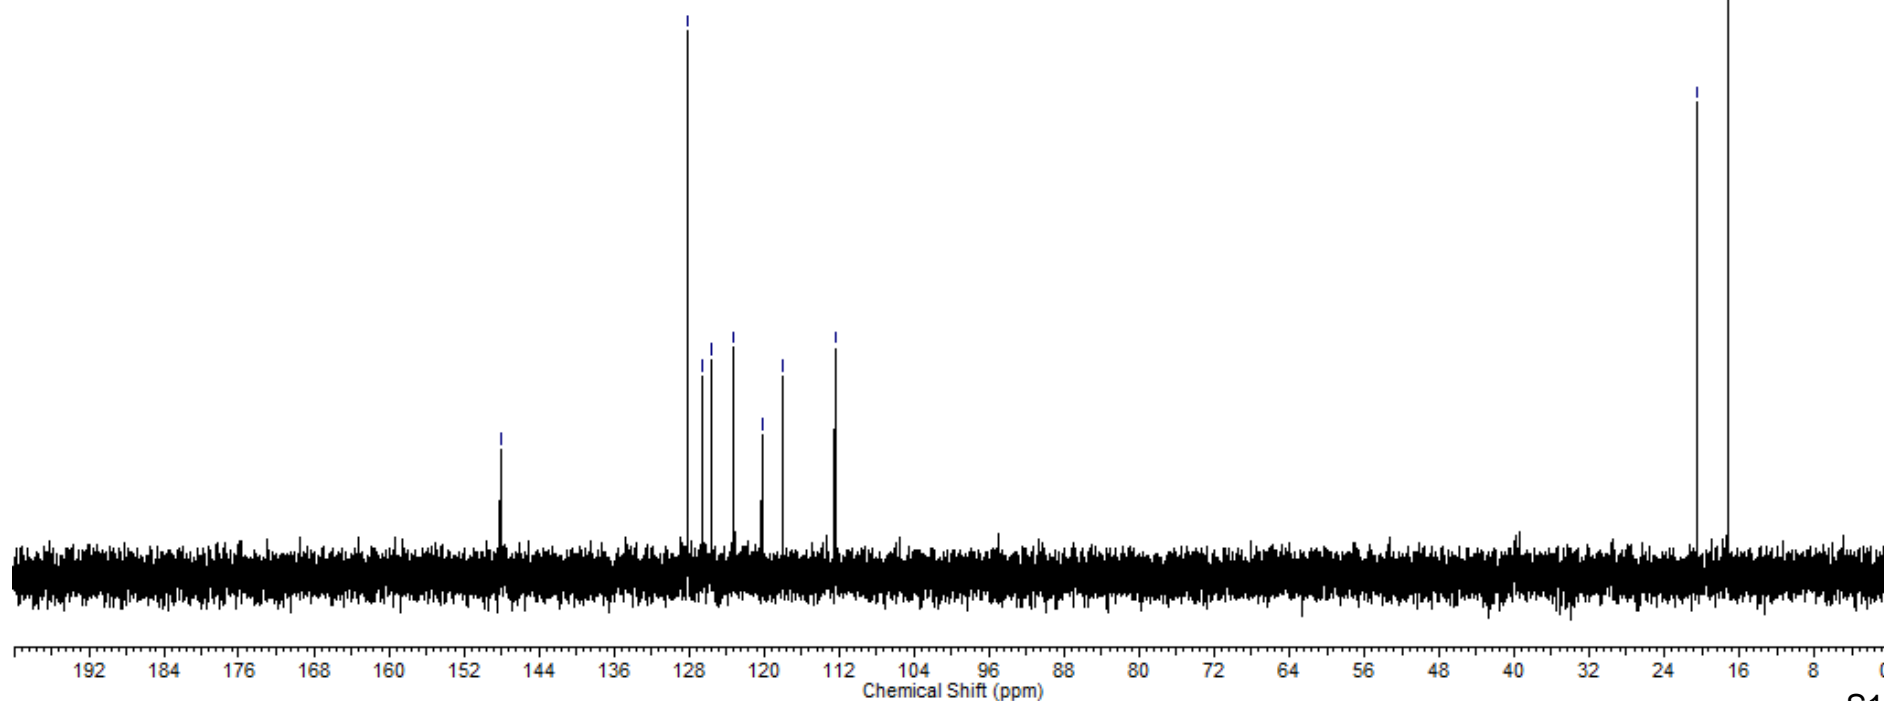

MAN7876.001.esp

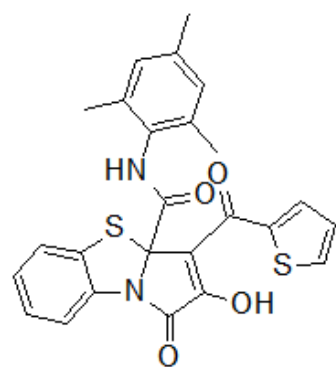

<sup>1</sup>H NMR of 12hb

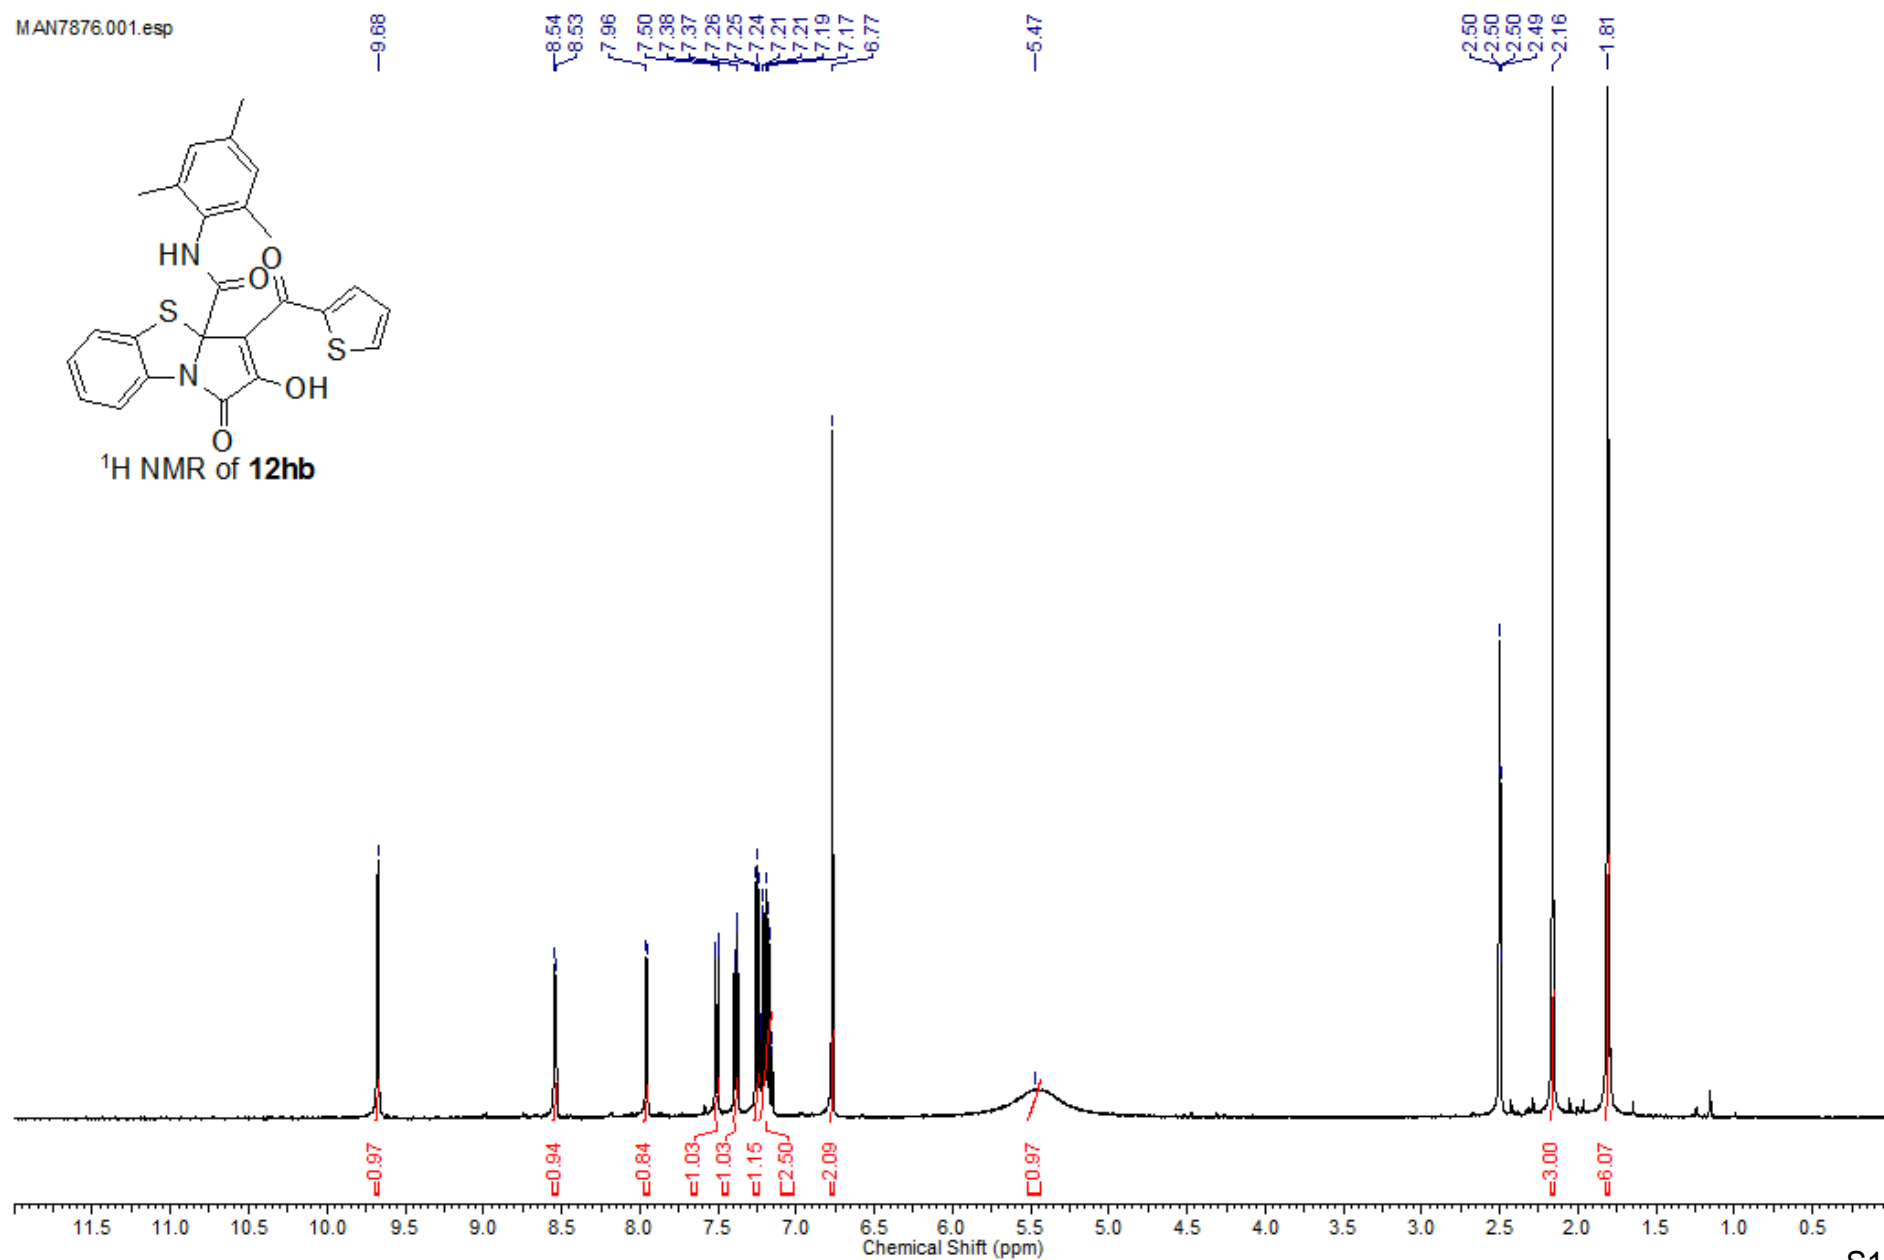

MAN7876.002.esp

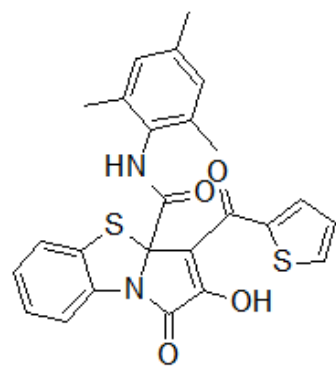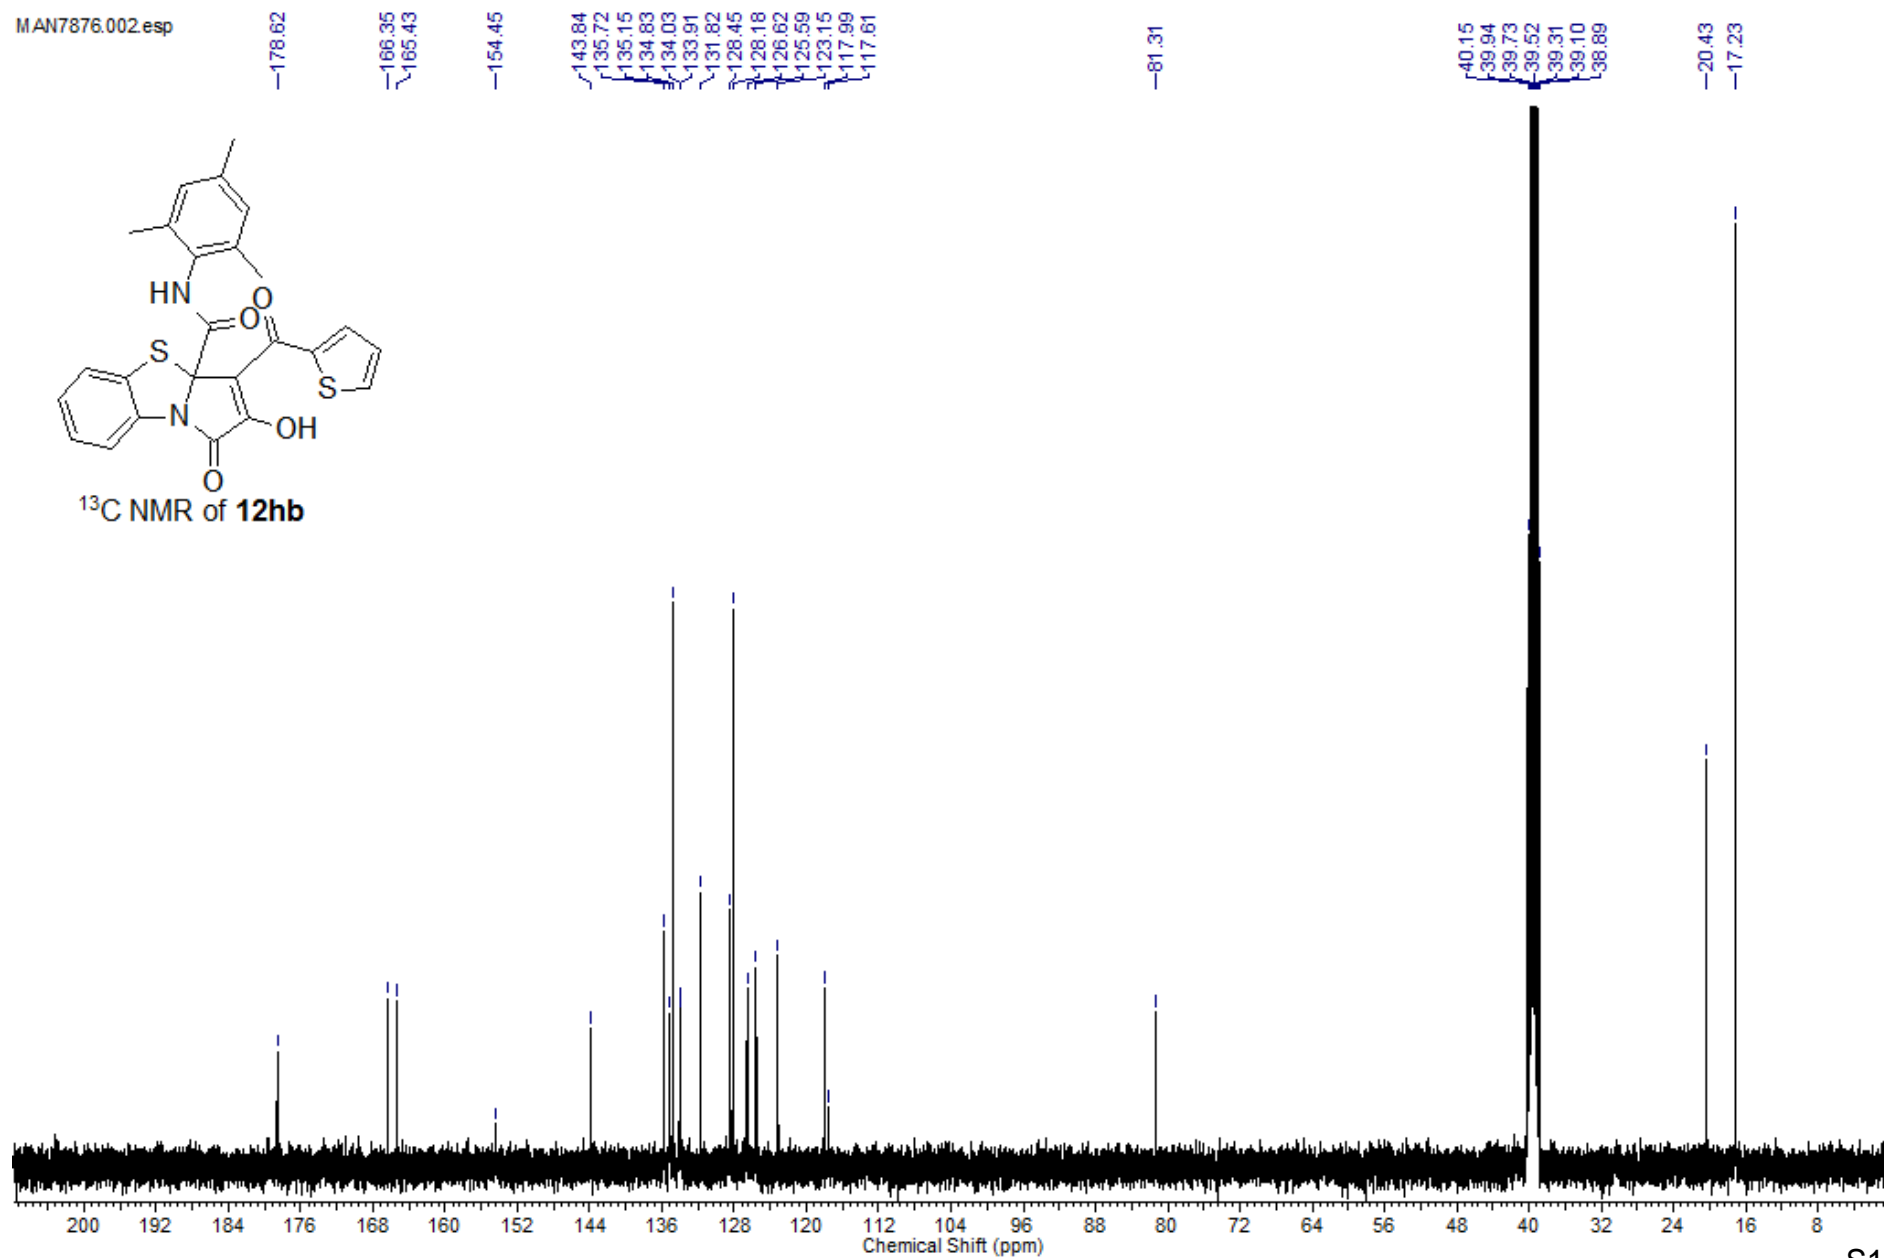

MAN7876.003.esp

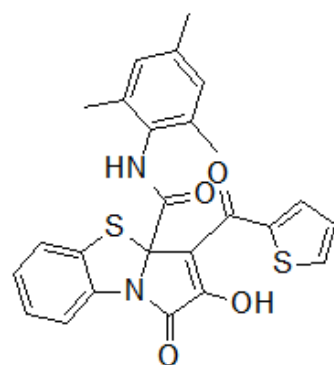

DEPT135 of 12hb

135.15  
134.04  
128.45  
128.18  
126.62  
125.59  
123.15  
117.98

20.43  
17.23

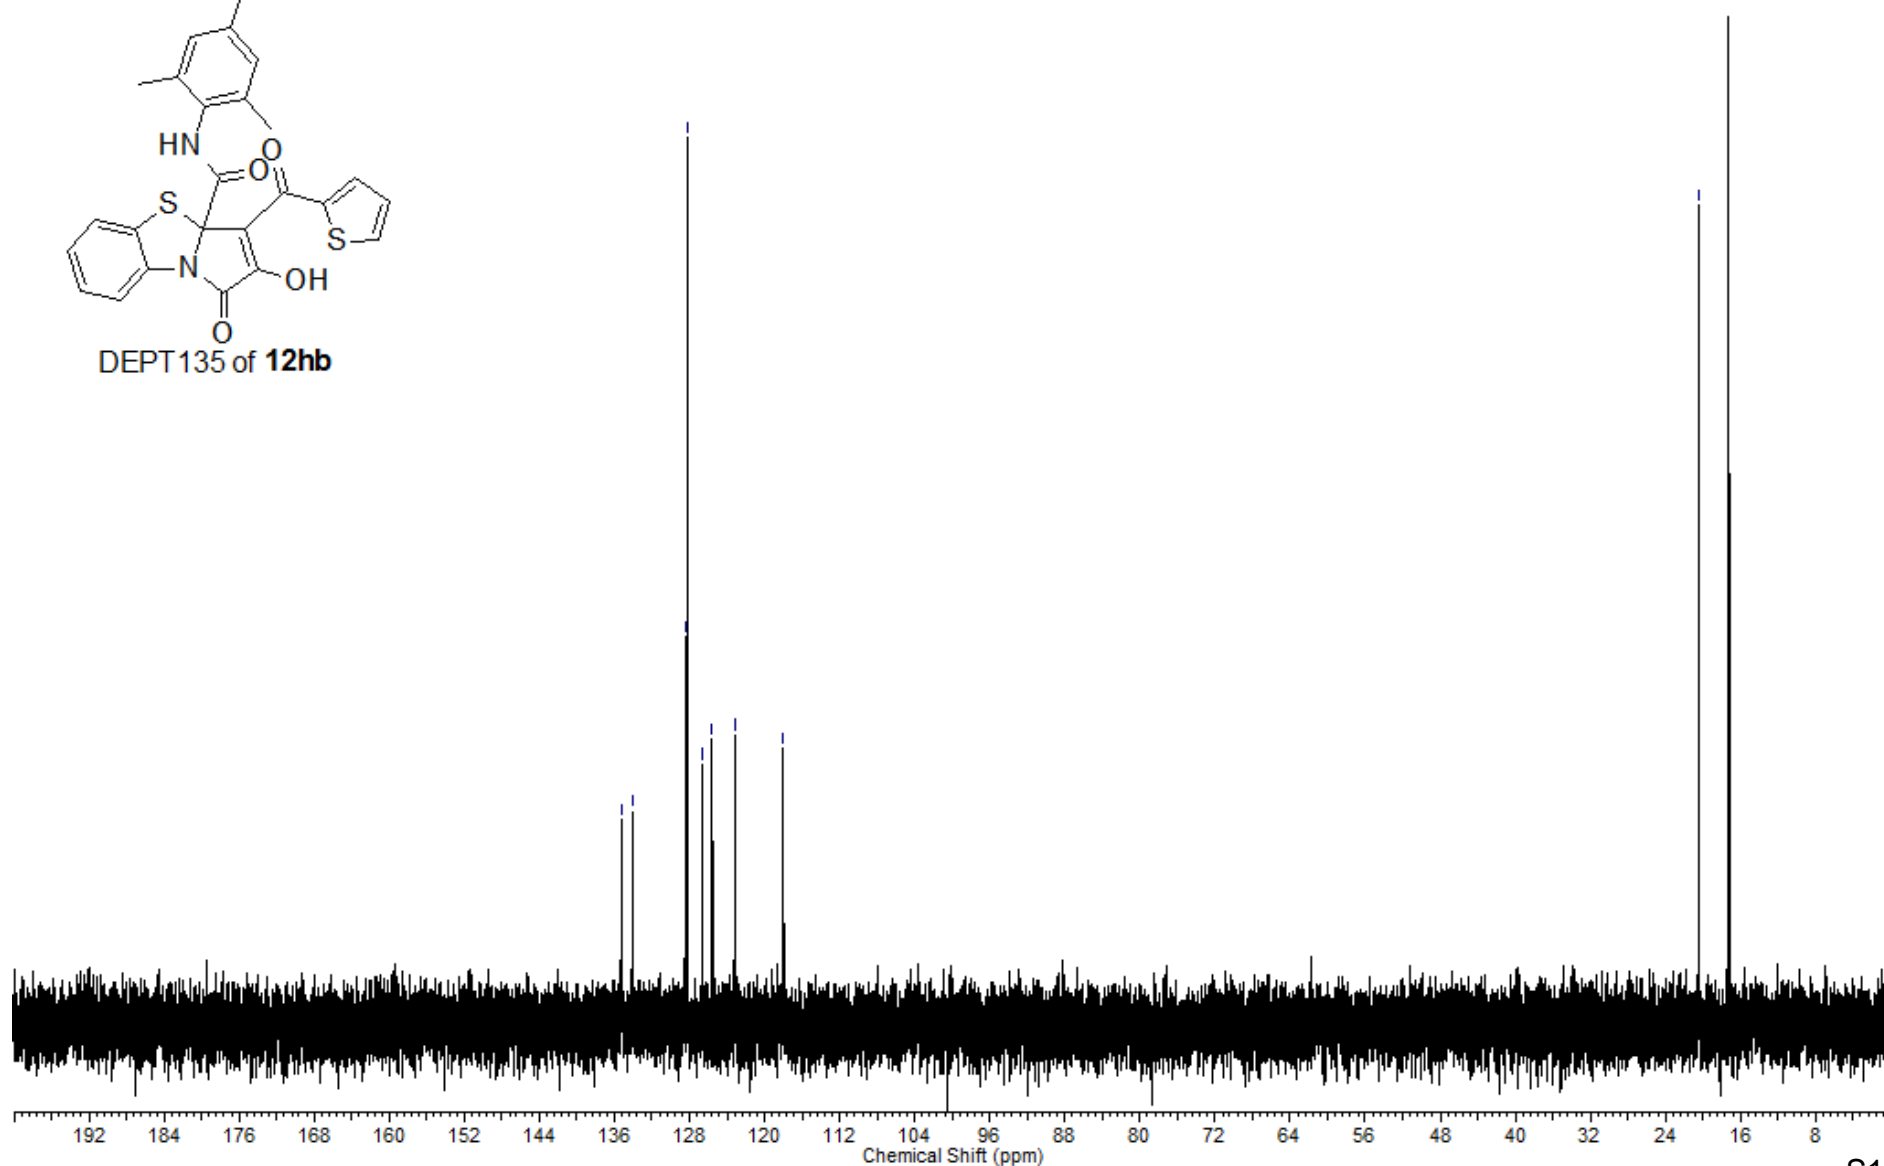

MAN6868.001.esp

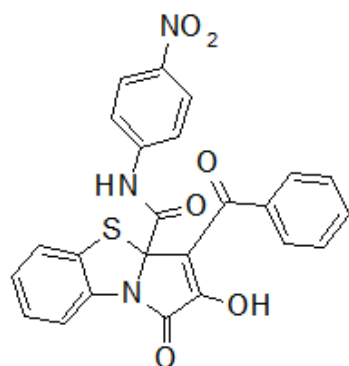

<sup>1</sup>H NMR of 12ac

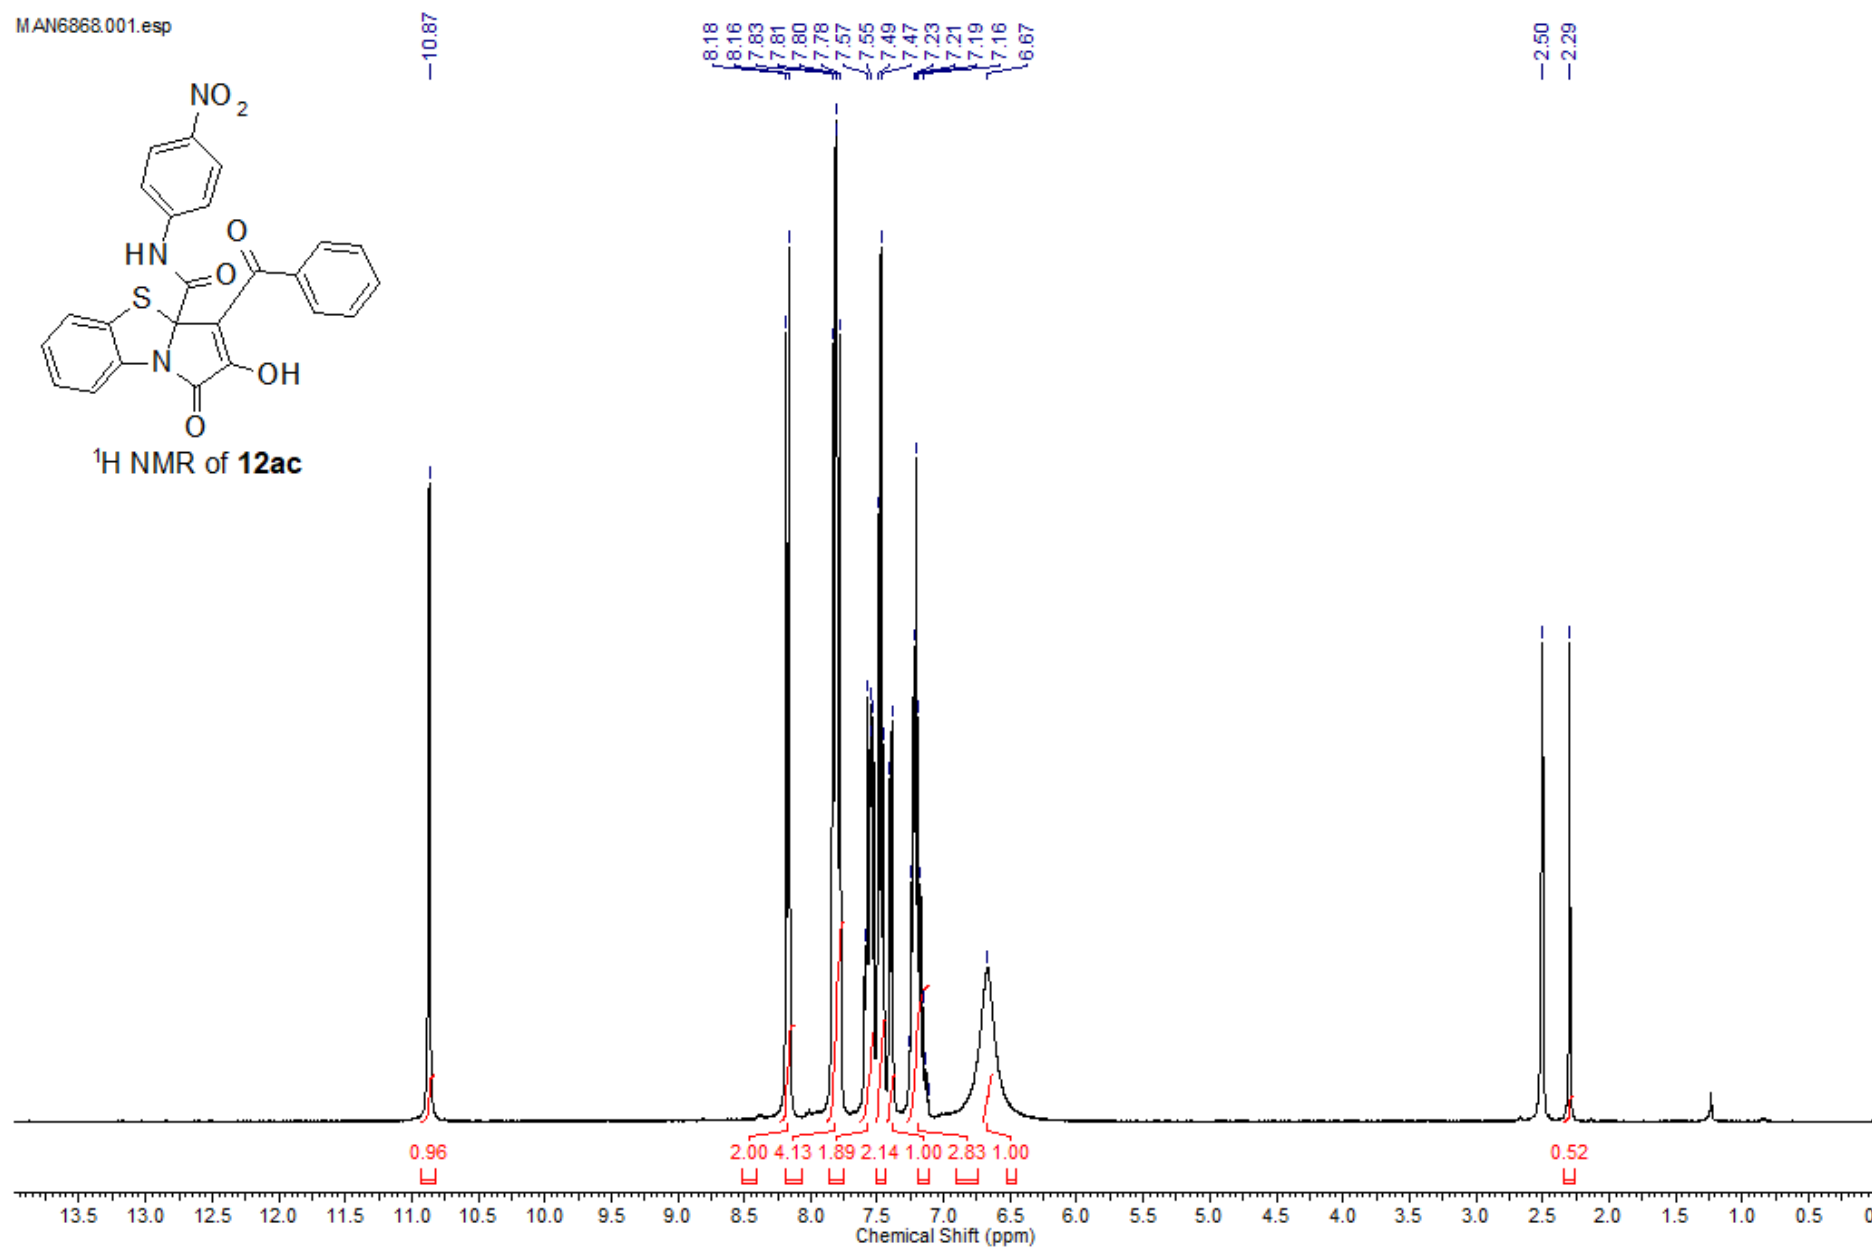

MAN6868.002.esp

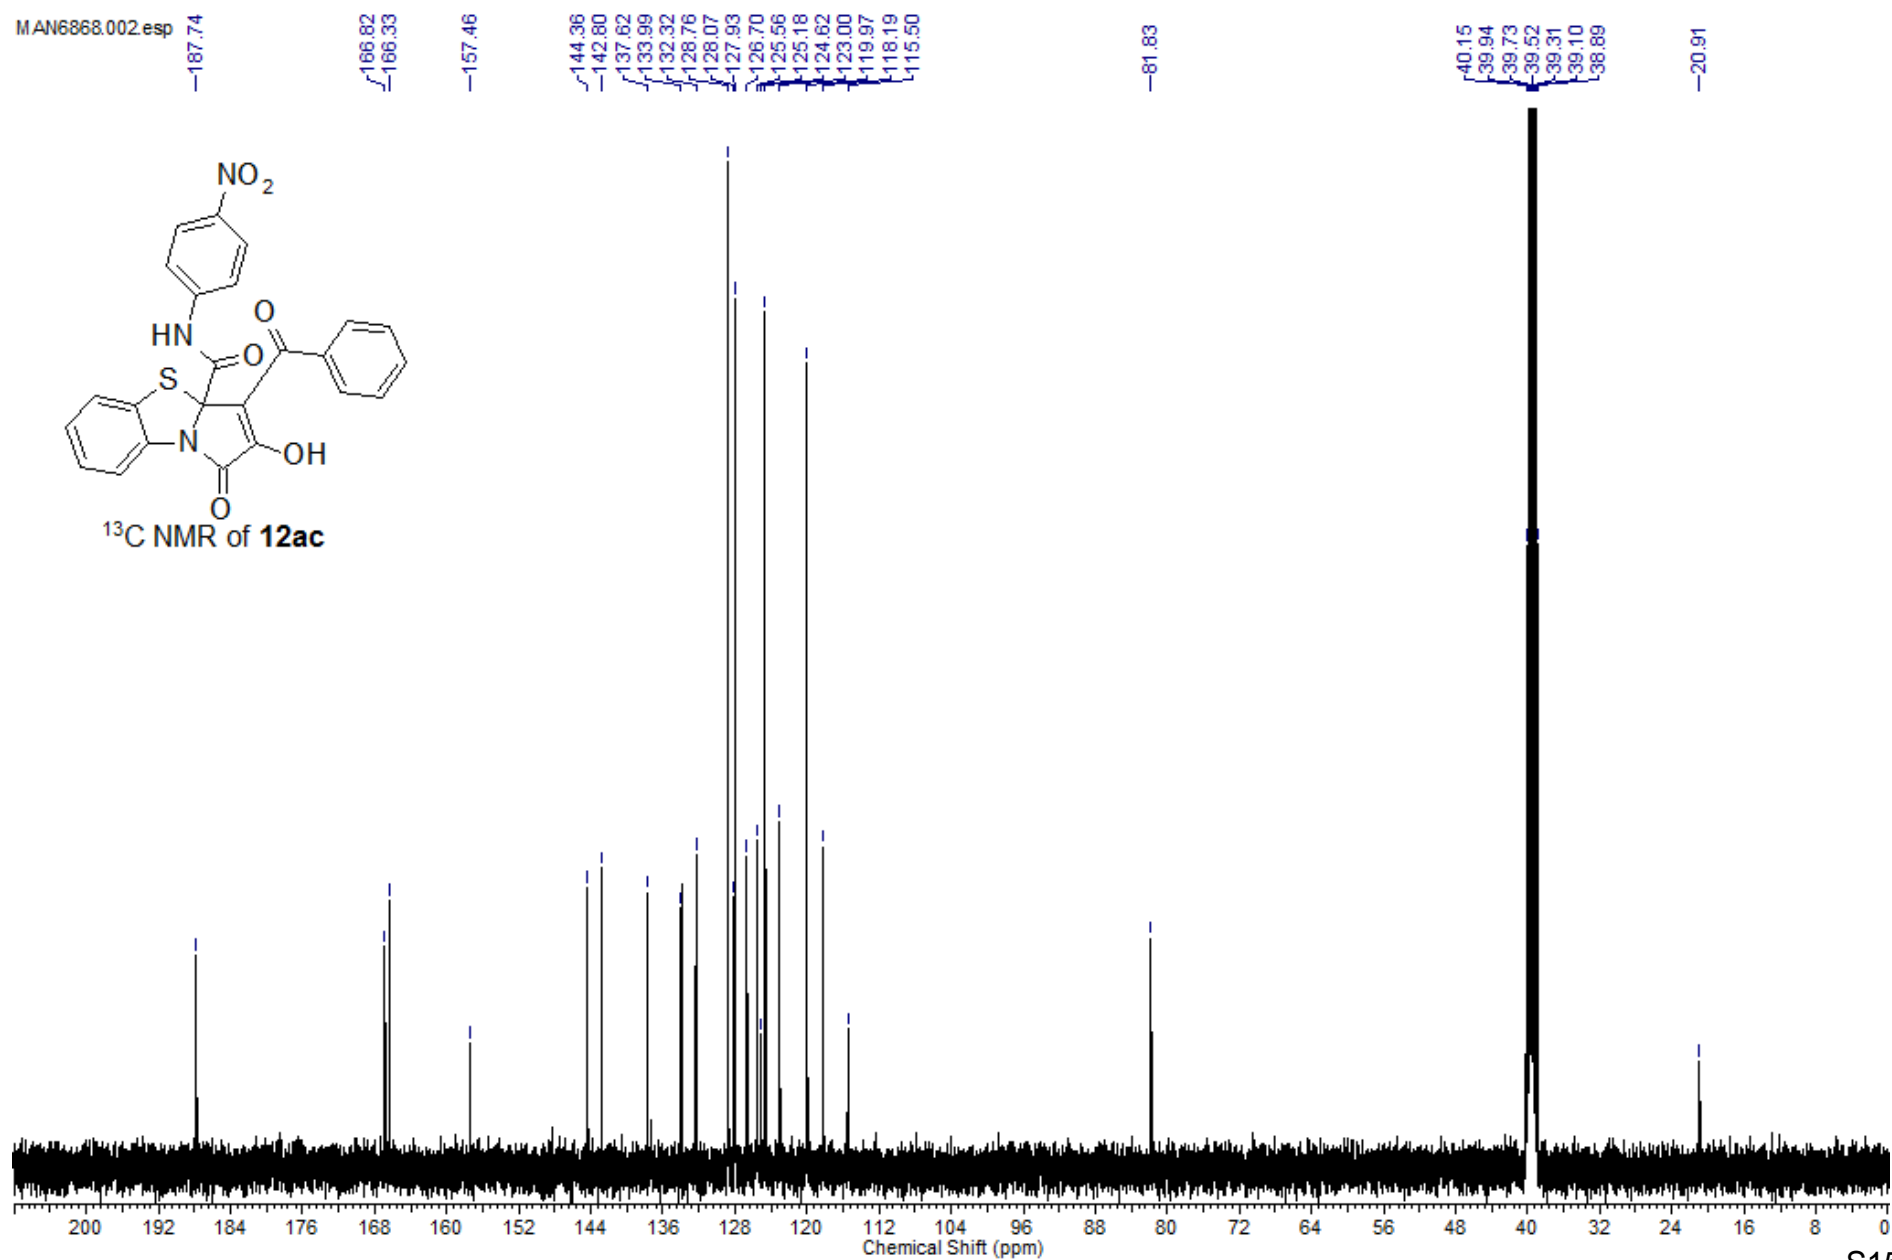



MAN6868.003.esp

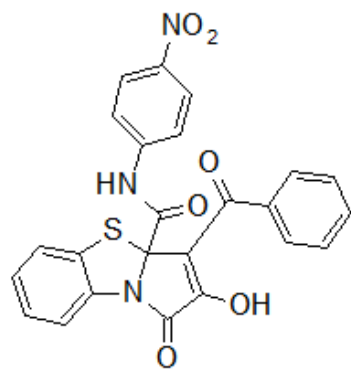

DEPT135 of **12ac**

132.32  
128.77  
128.07  
127.94  
126.70  
125.56  
124.62  
123.00  
119.97  
118.19

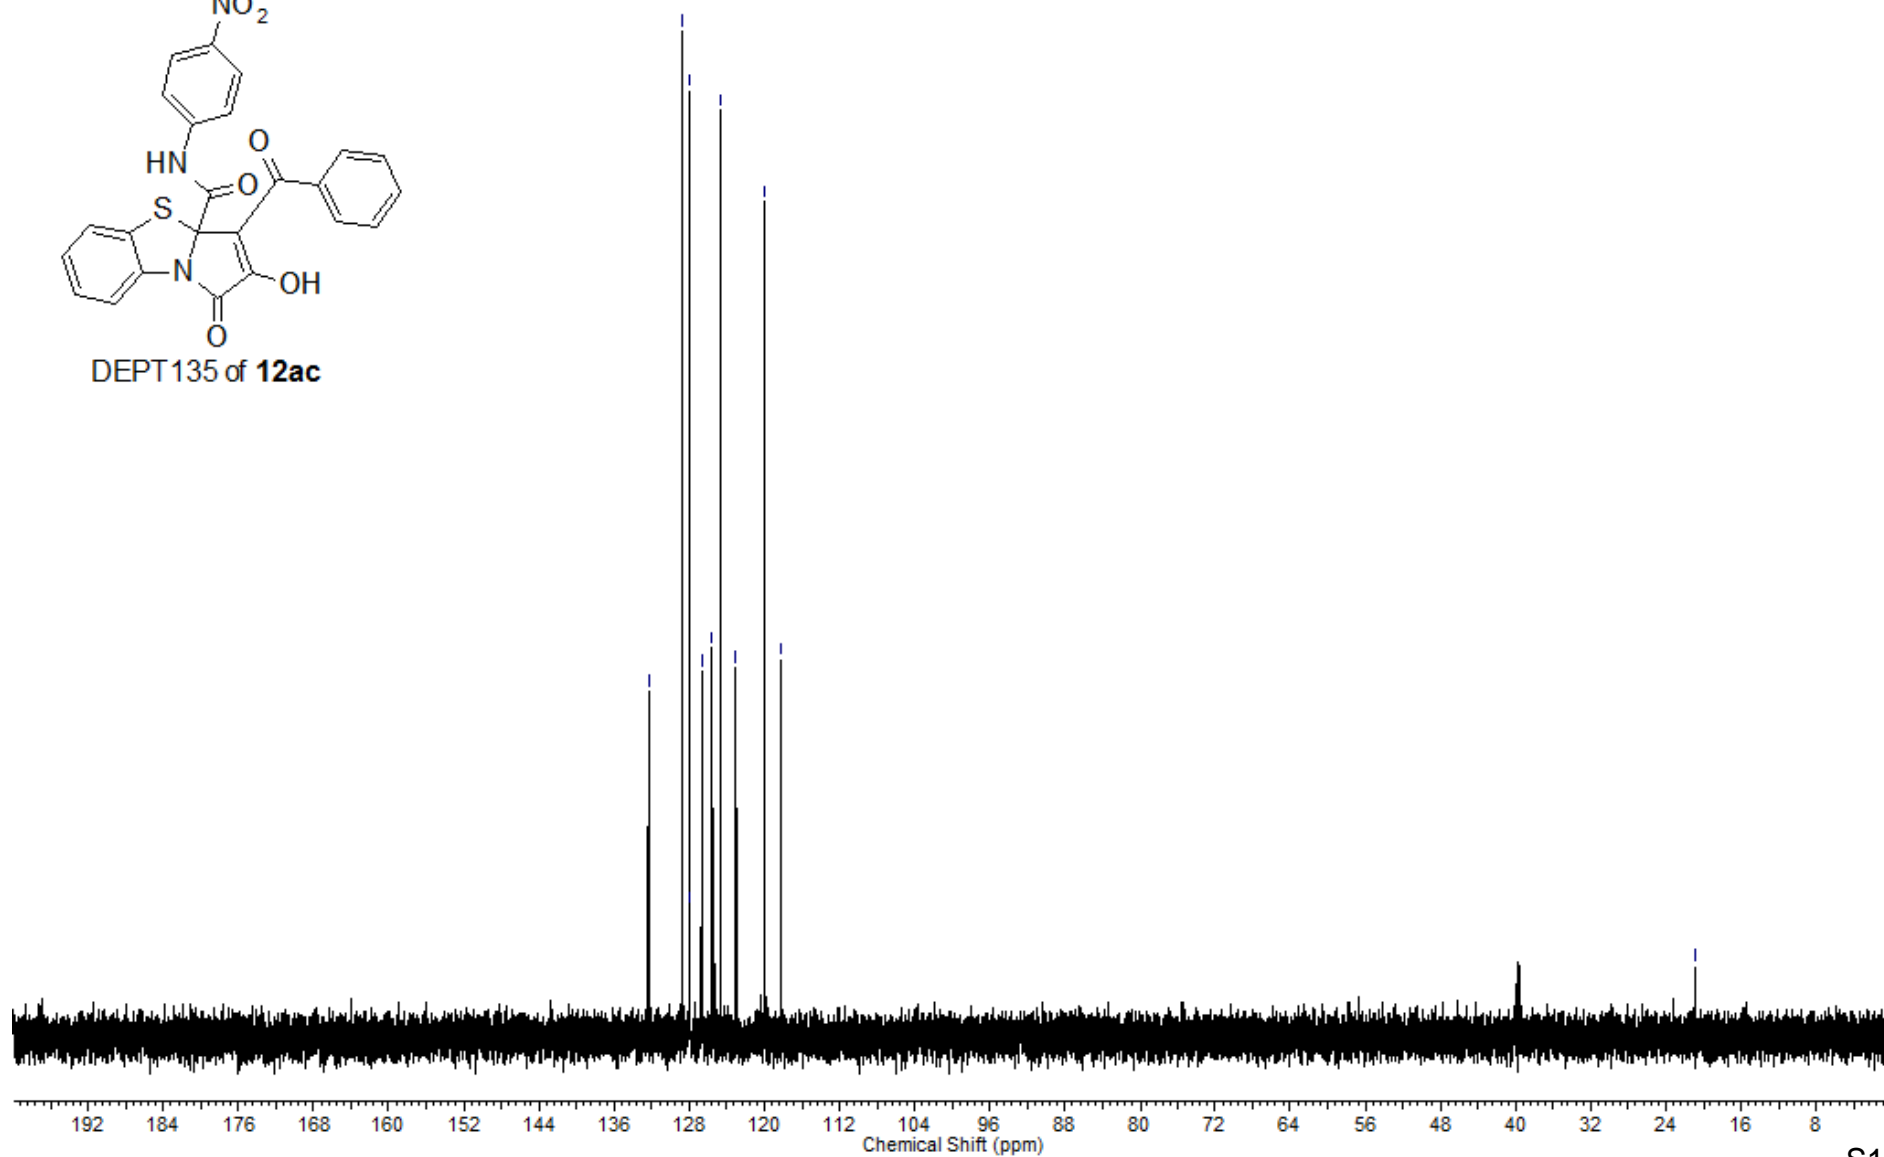

-20.91

MAN7323.001.esp

-10.79

8.18  
8.16  
7.80  
7.78  
7.76  
7.74  
7.54  
7.39  
7.29  
7.27  
7.22  
7.21  
7.19

-2.50  
-2.37

-1.23

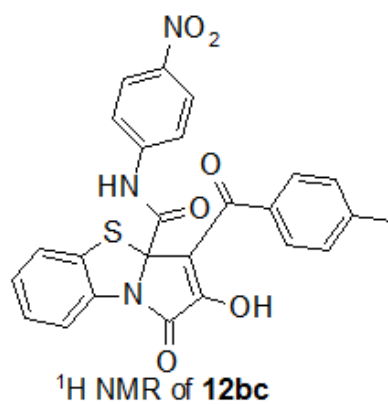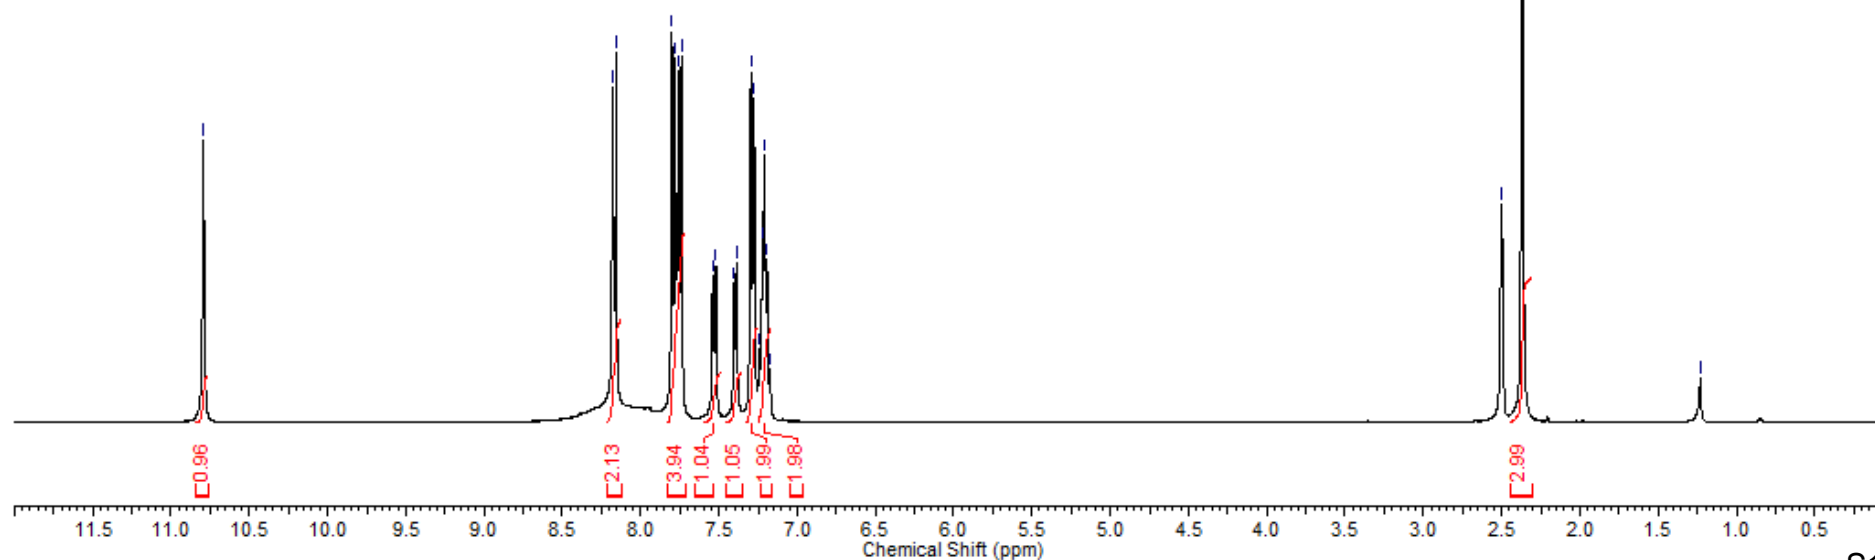

MAN7323.002.esp

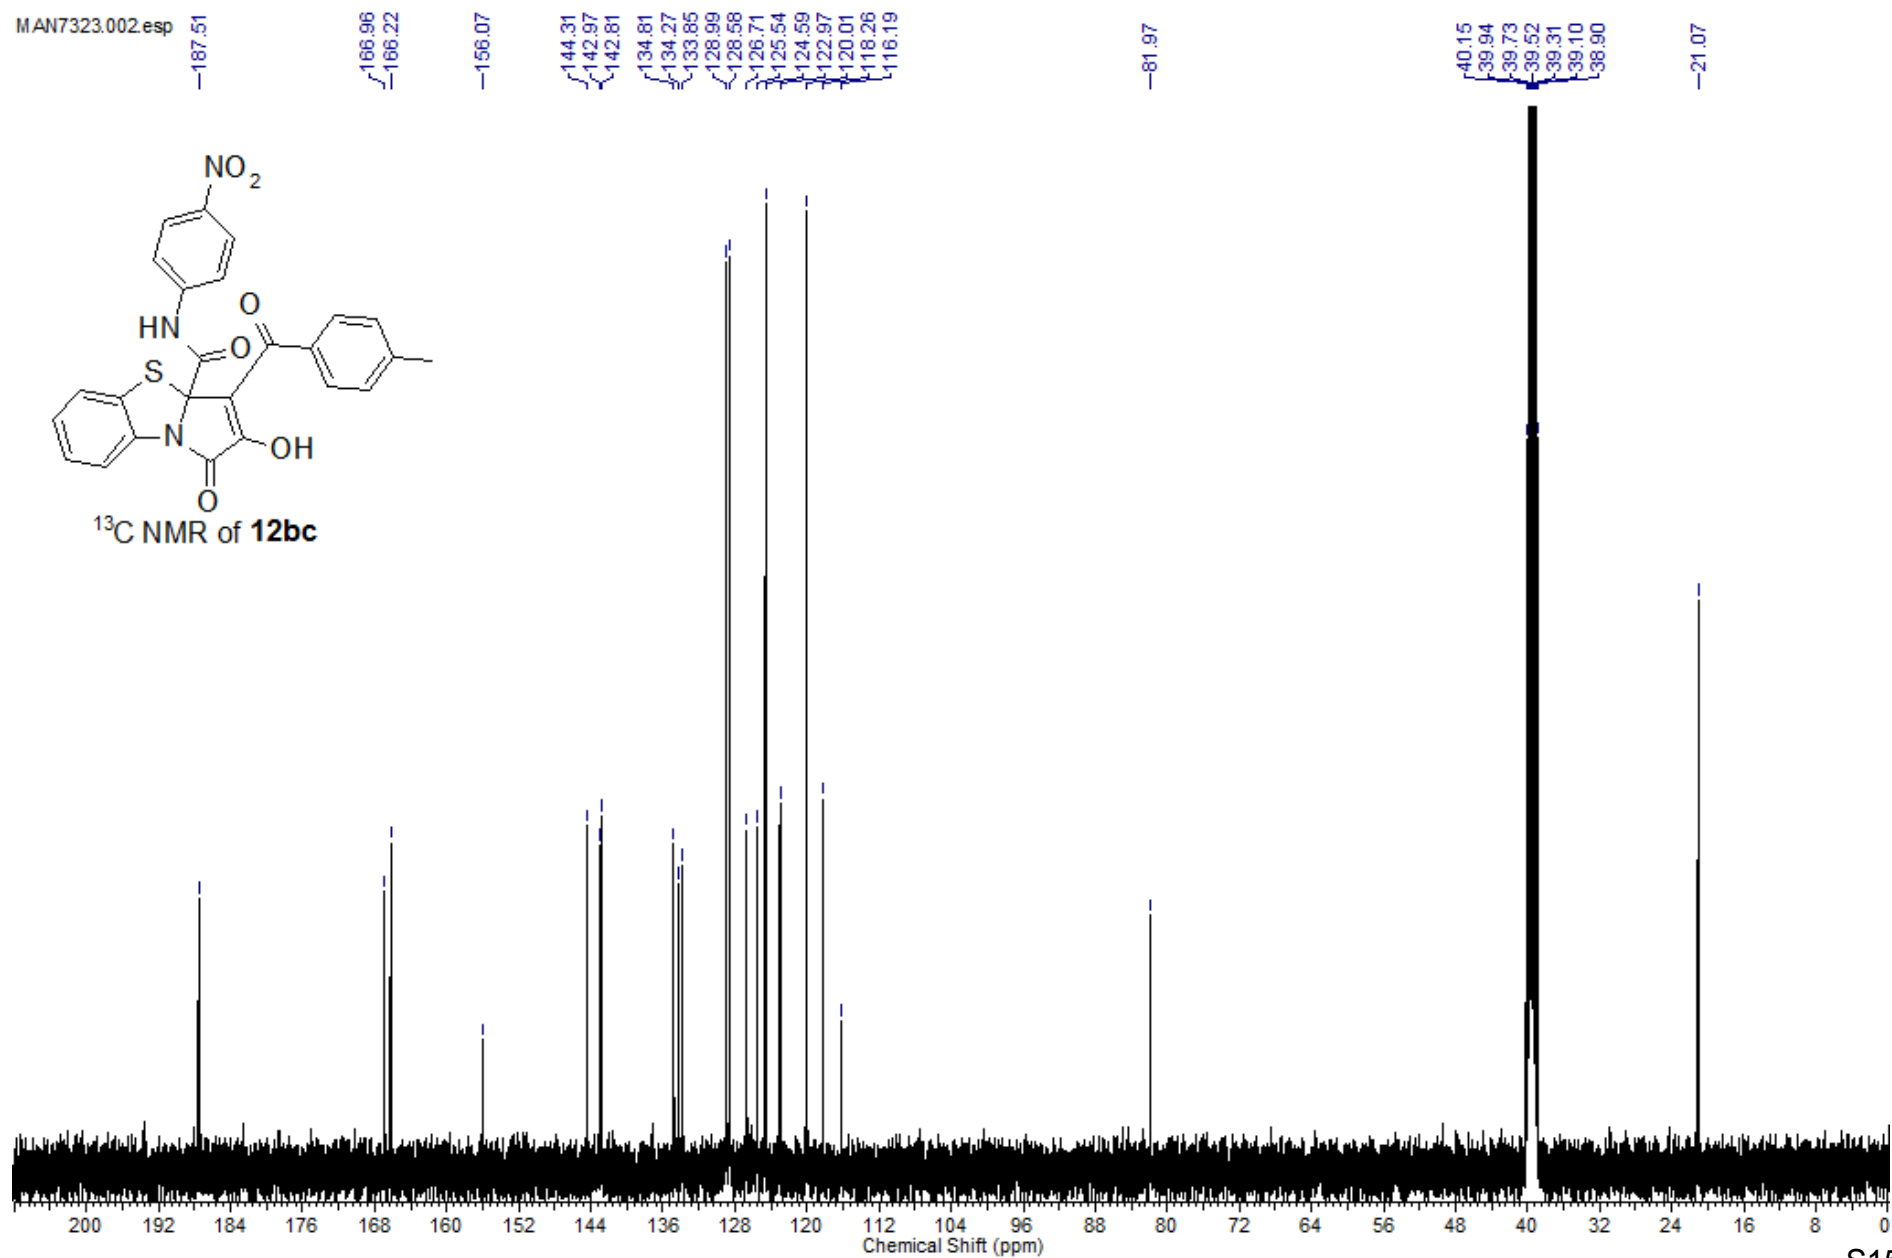

MAN7323.003.esp

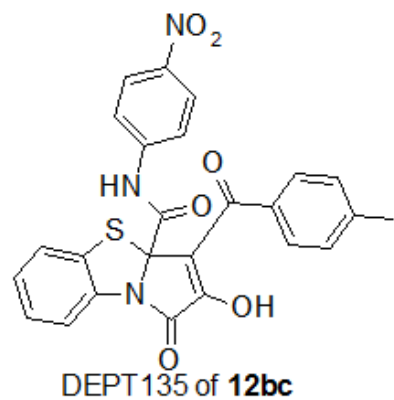

128.98  
126.58  
126.71  
125.54  
124.59  
122.97  
120.00  
118.26

-21.07

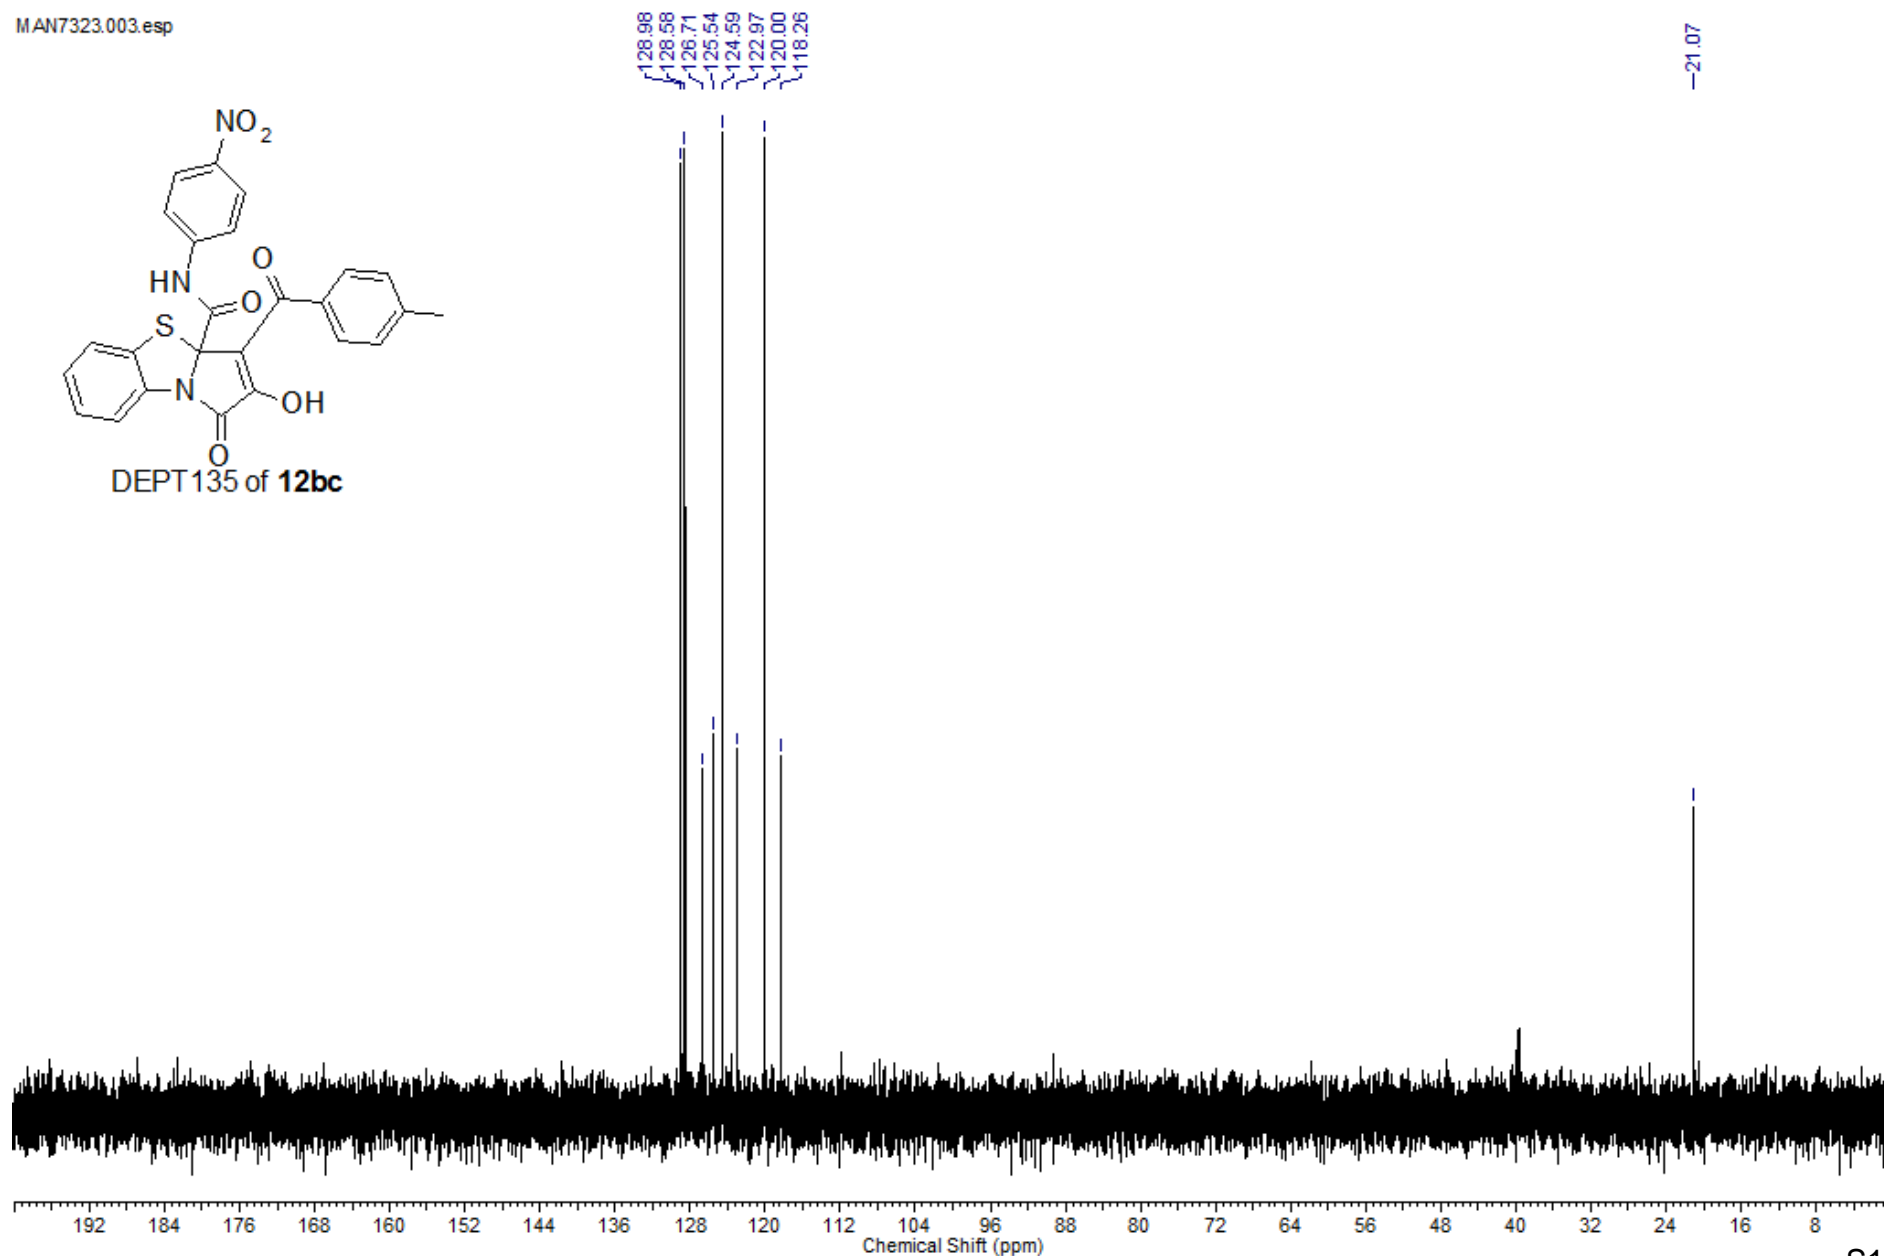

S156

MAN7780.001.esp

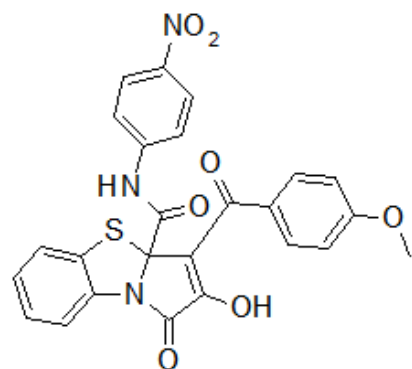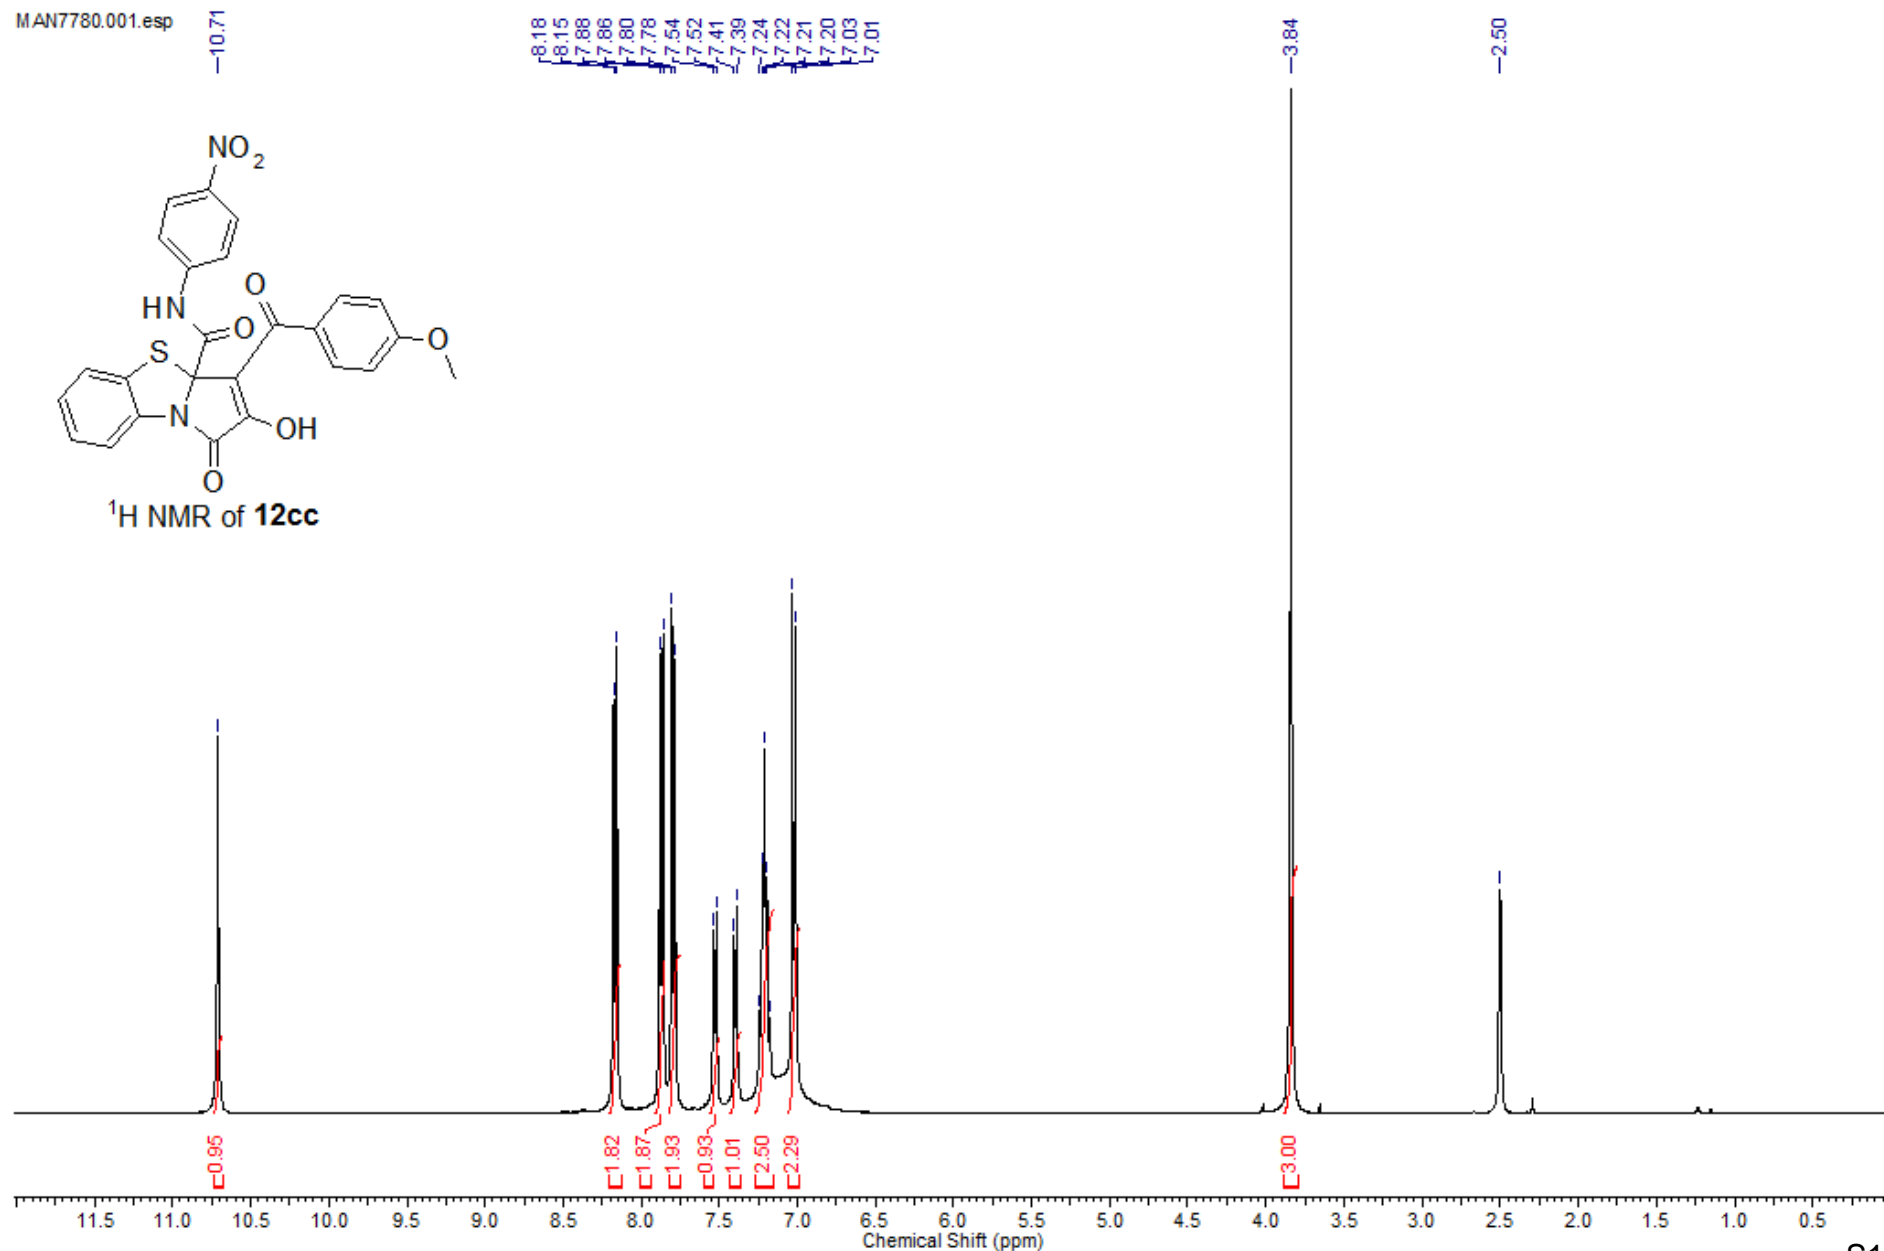

MAN7780.002.esp

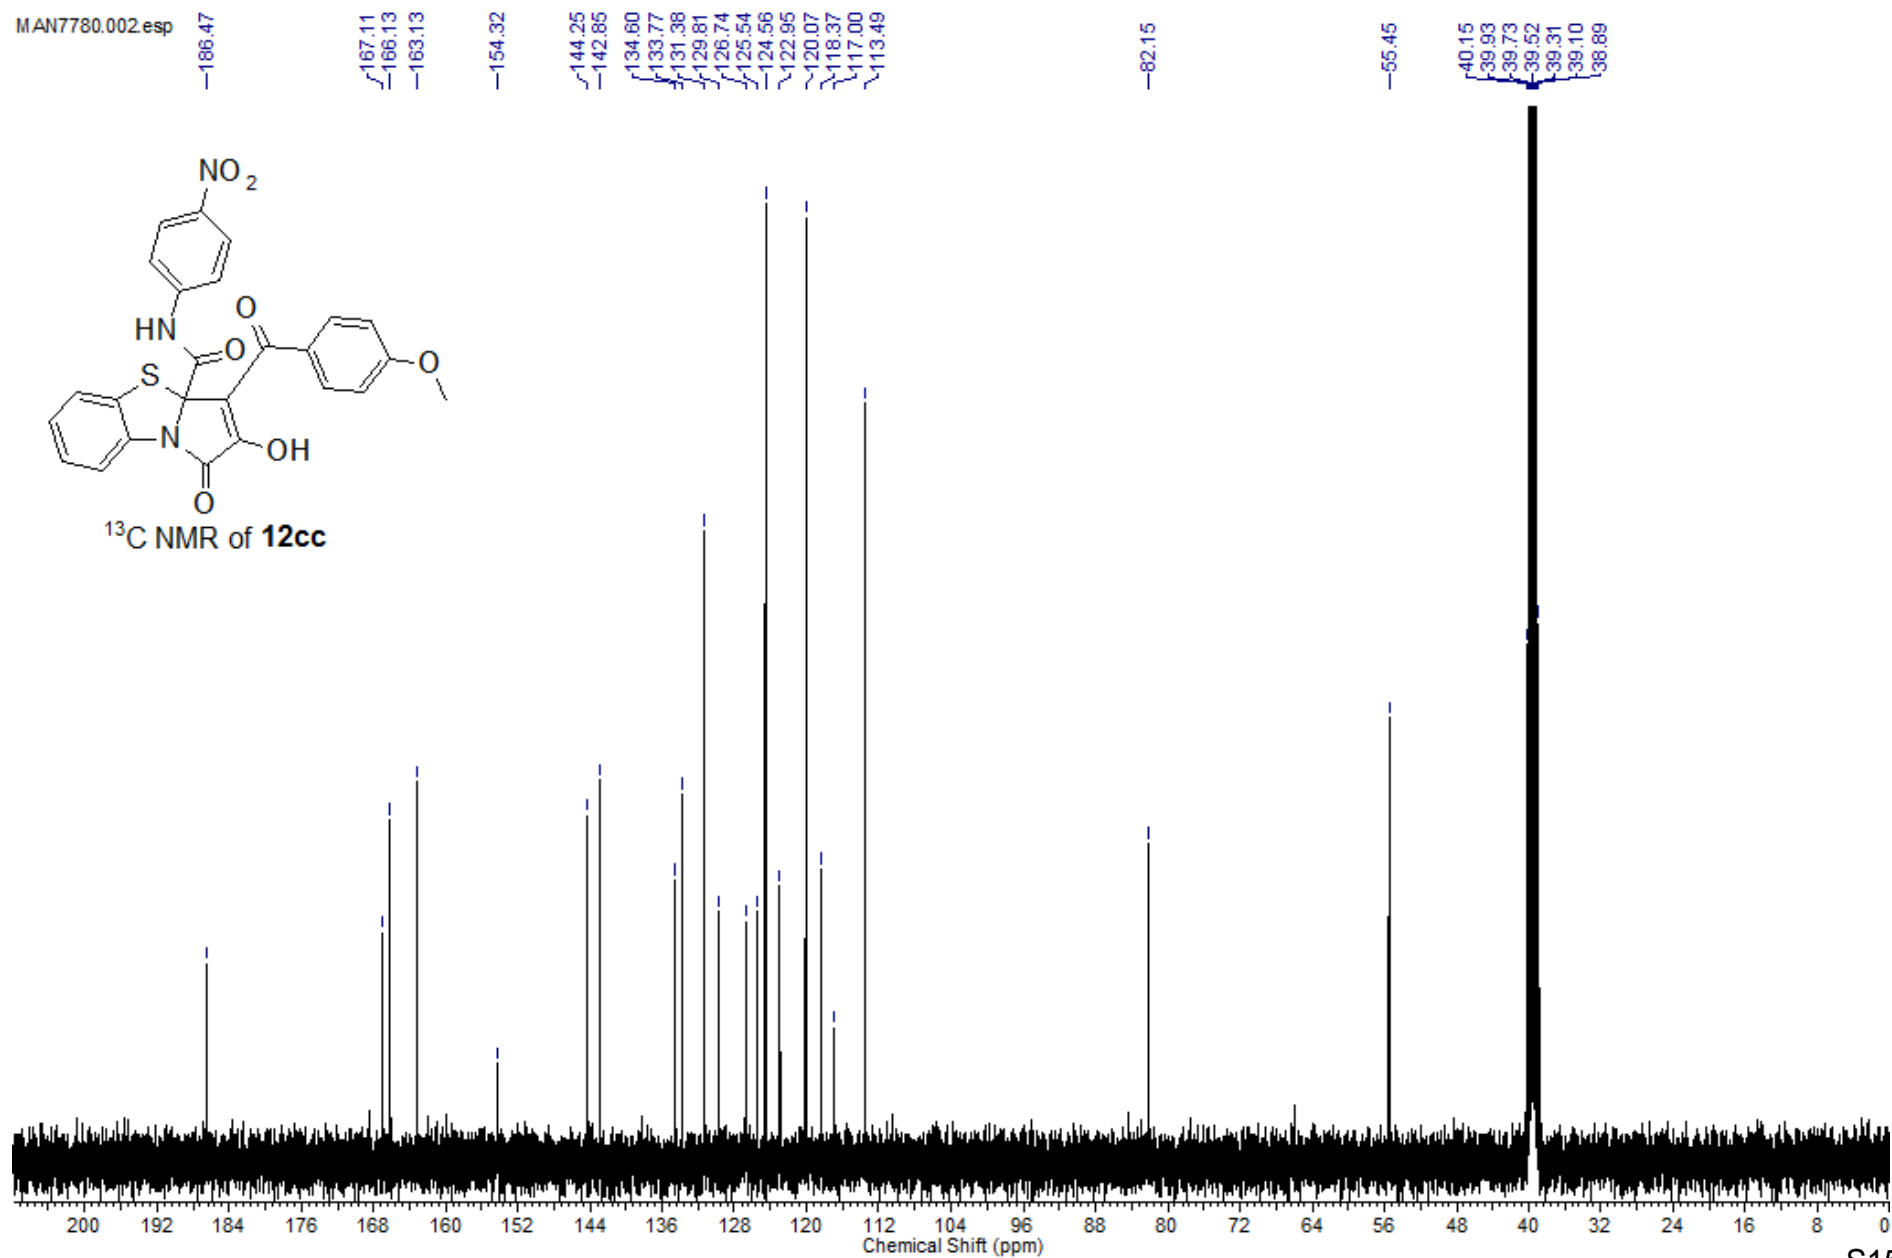

MAN7780.003.esp

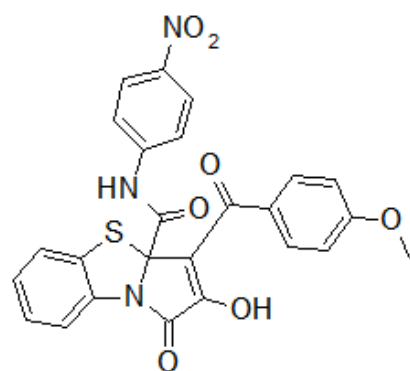

DEPT 135 of 12cc

131.38  
126.73  
125.54  
124.56  
122.96  
120.08  
118.36  
113.49

55.45

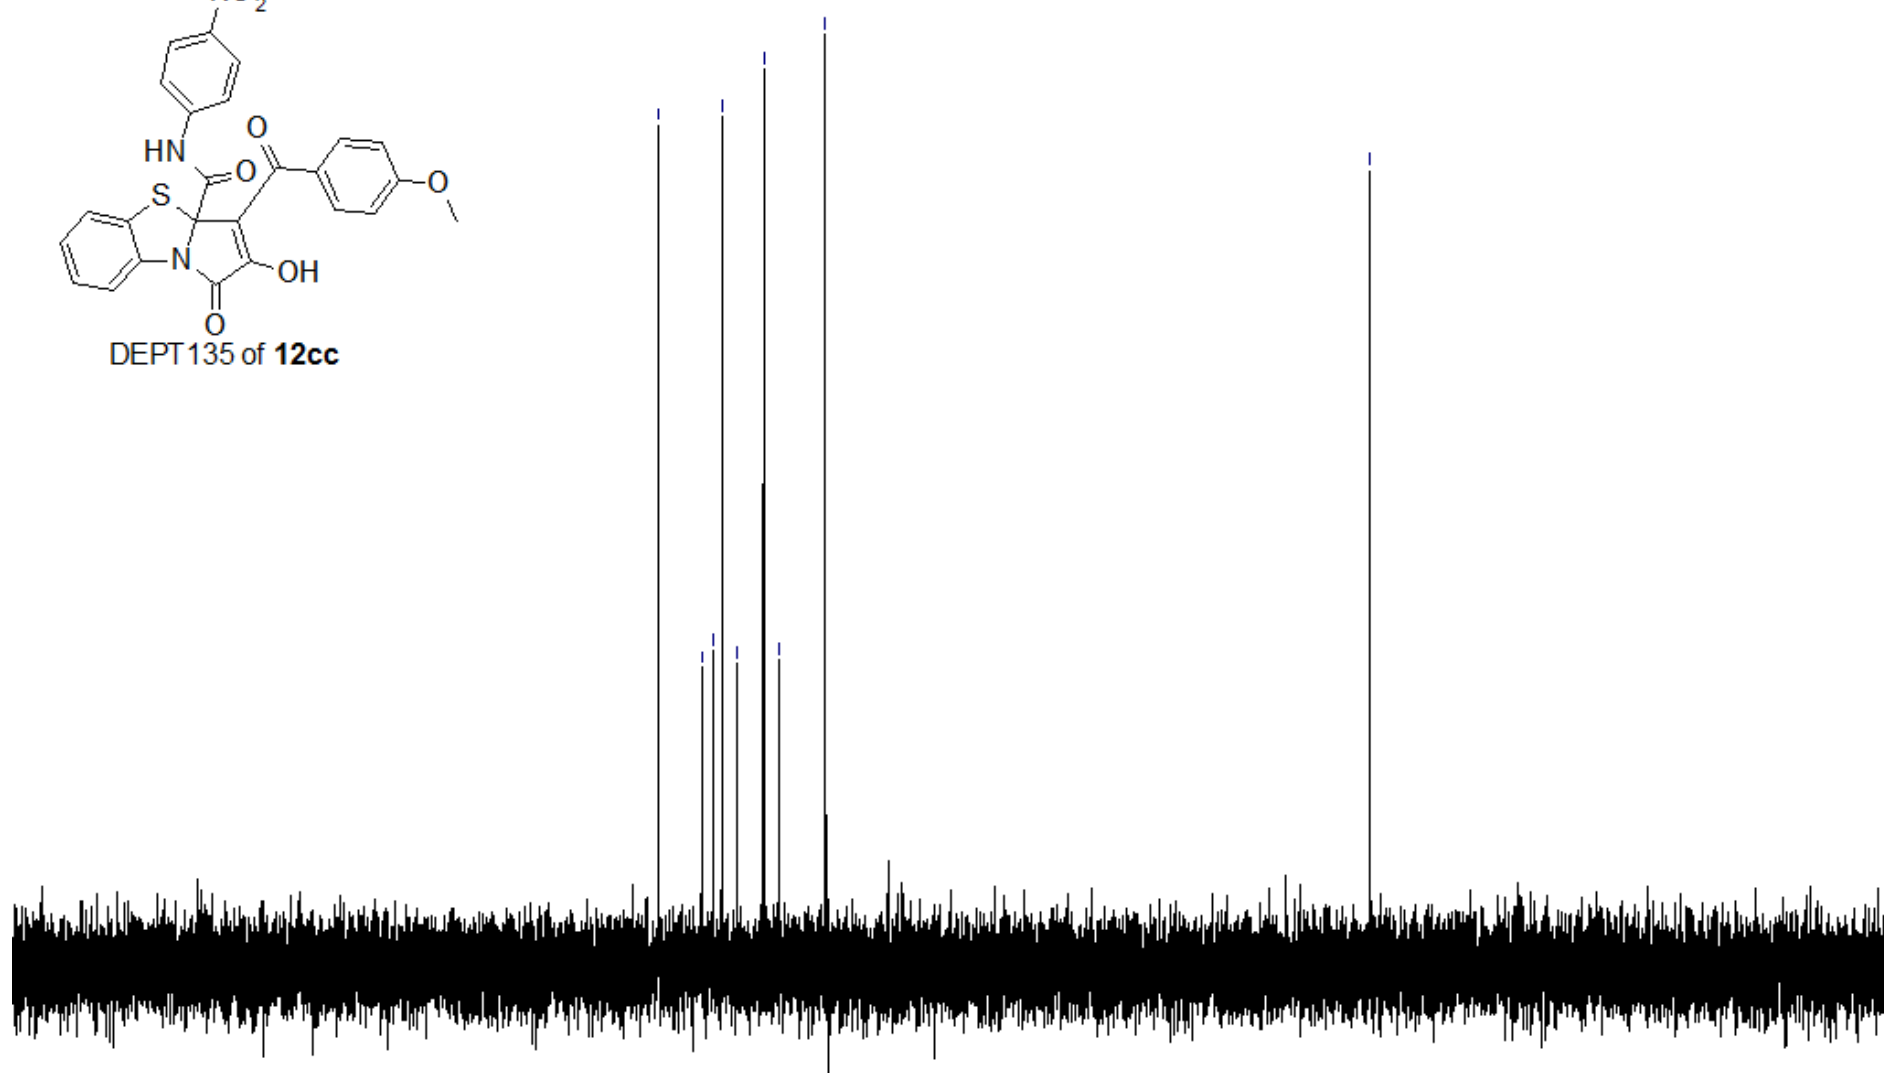

MAN7901.001.e6

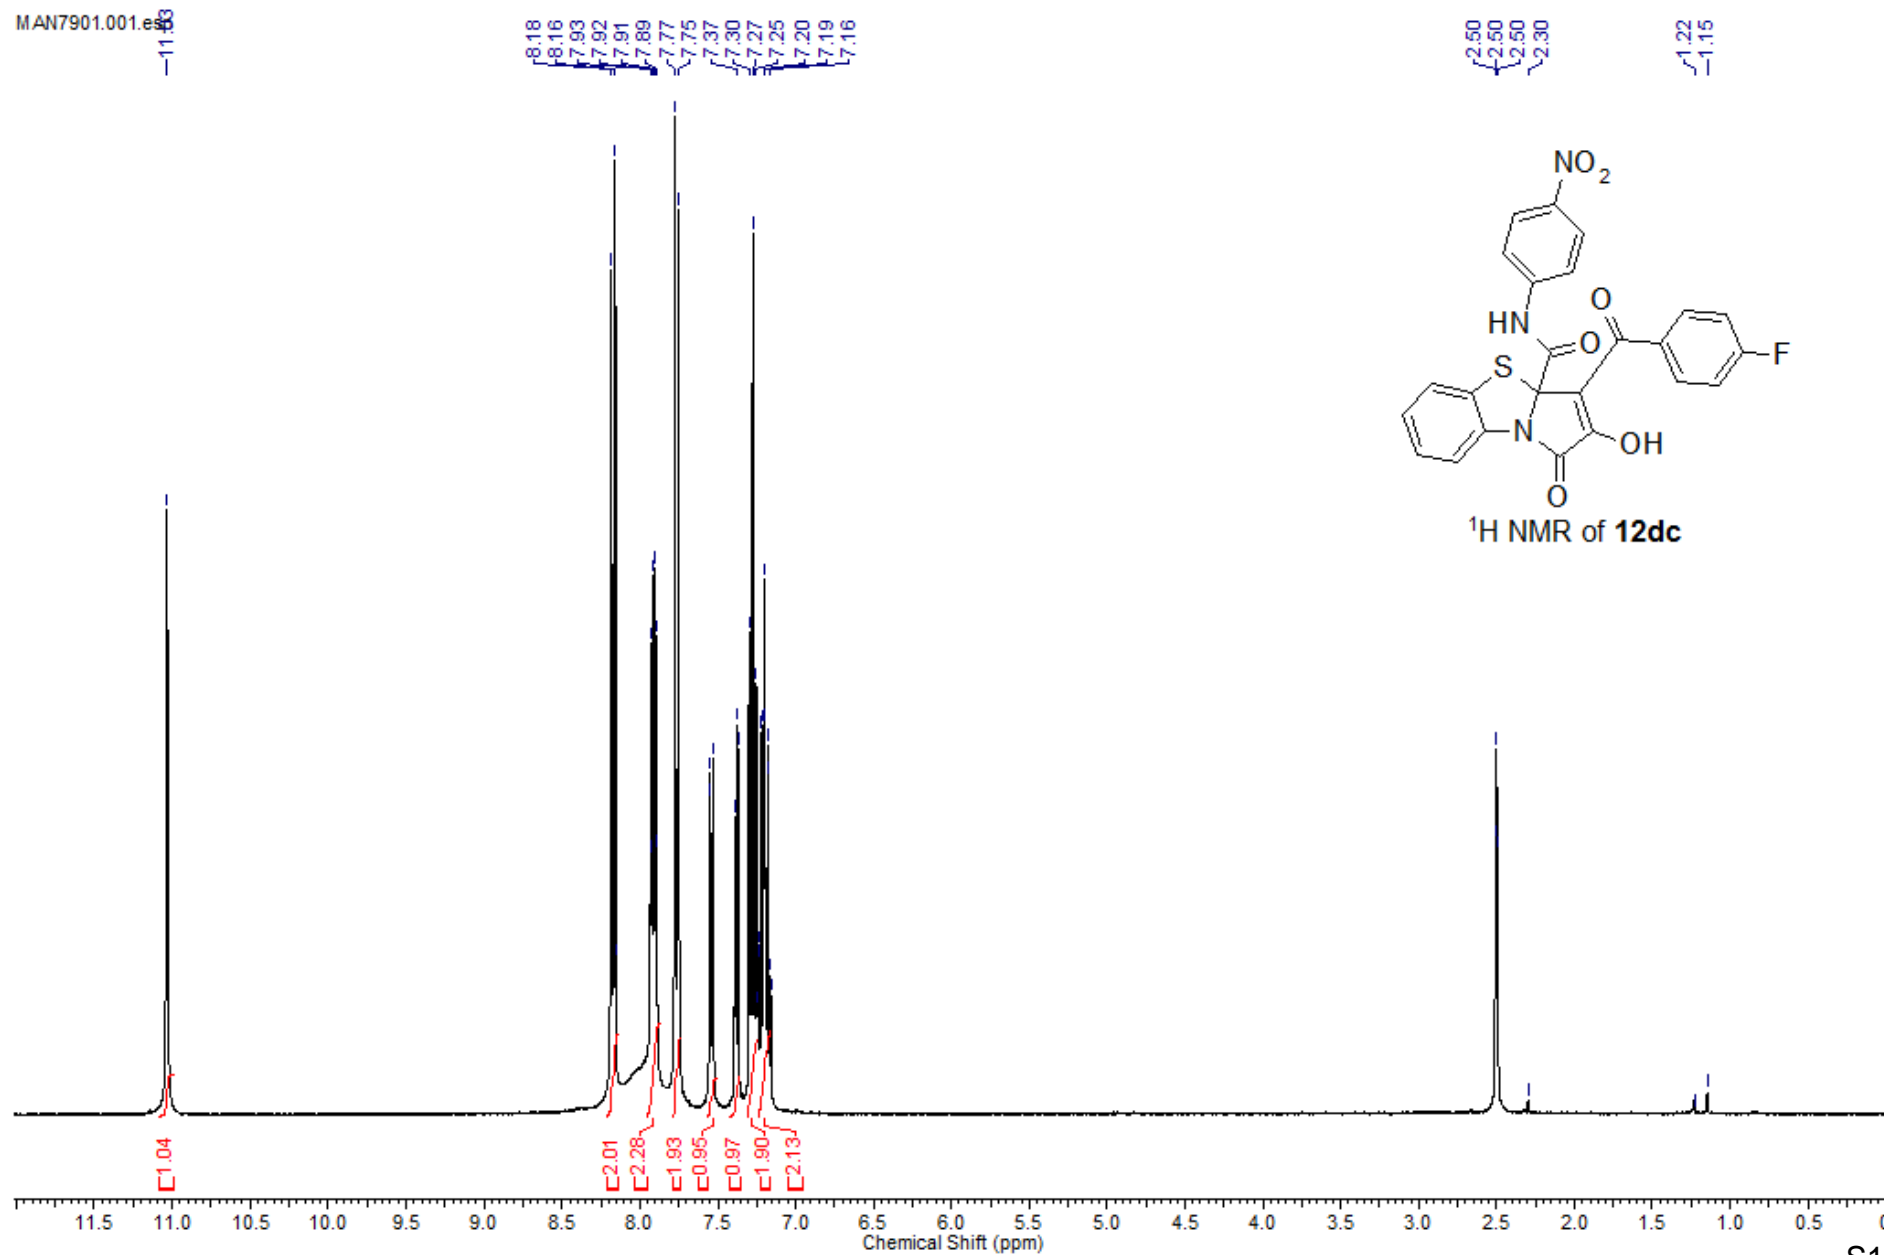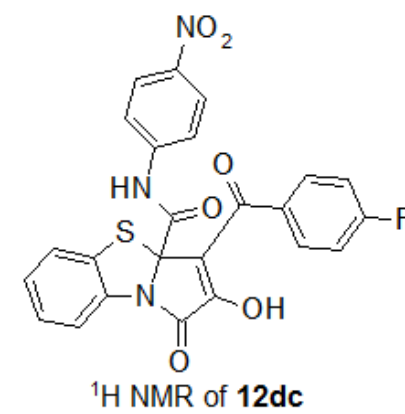



MAN7901.002.esp

185.72

166.74  
166.62  
165.45  
162.97

144.47  
142.86  
134.53  
134.21  
133.39  
131.62  
131.52  
126.52  
125.50  
124.89  
122.95  
119.74  
117.94  
114.84  
114.62  
113.60

81.46

40.15  
39.93  
39.73  
39.52  
39.31  
39.10  
38.89

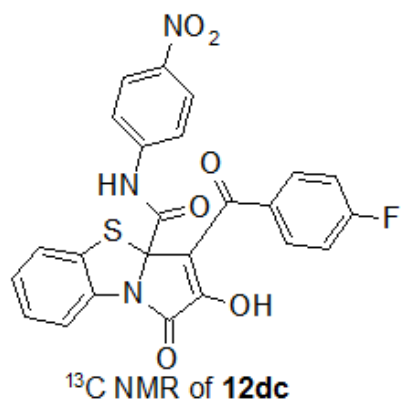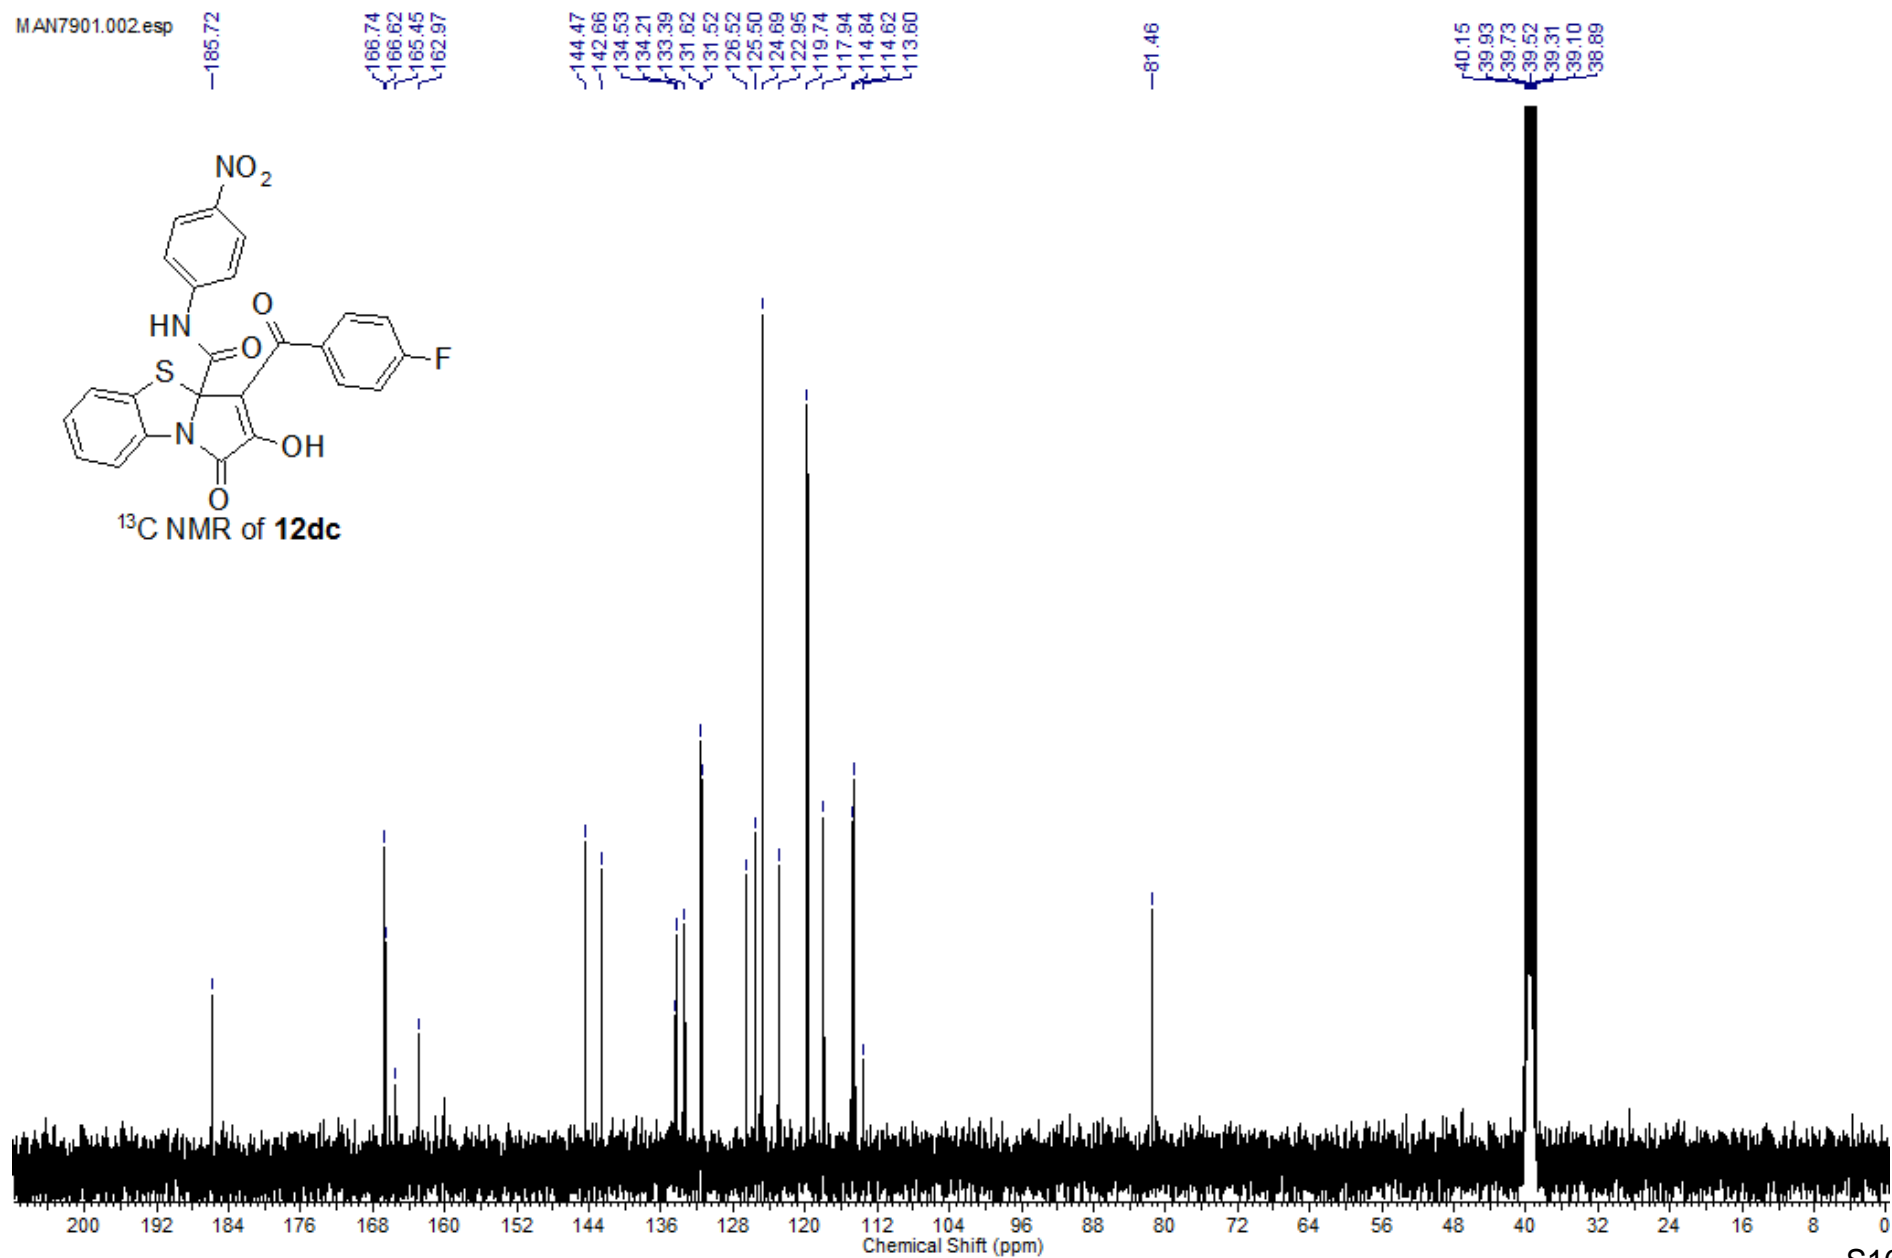

MAN7901.003.esp

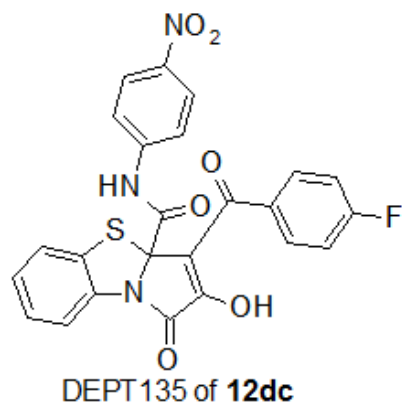

131.62  
131.53  
126.52  
125.51  
124.89  
122.96  
119.74  
117.94  
114.85  
114.63

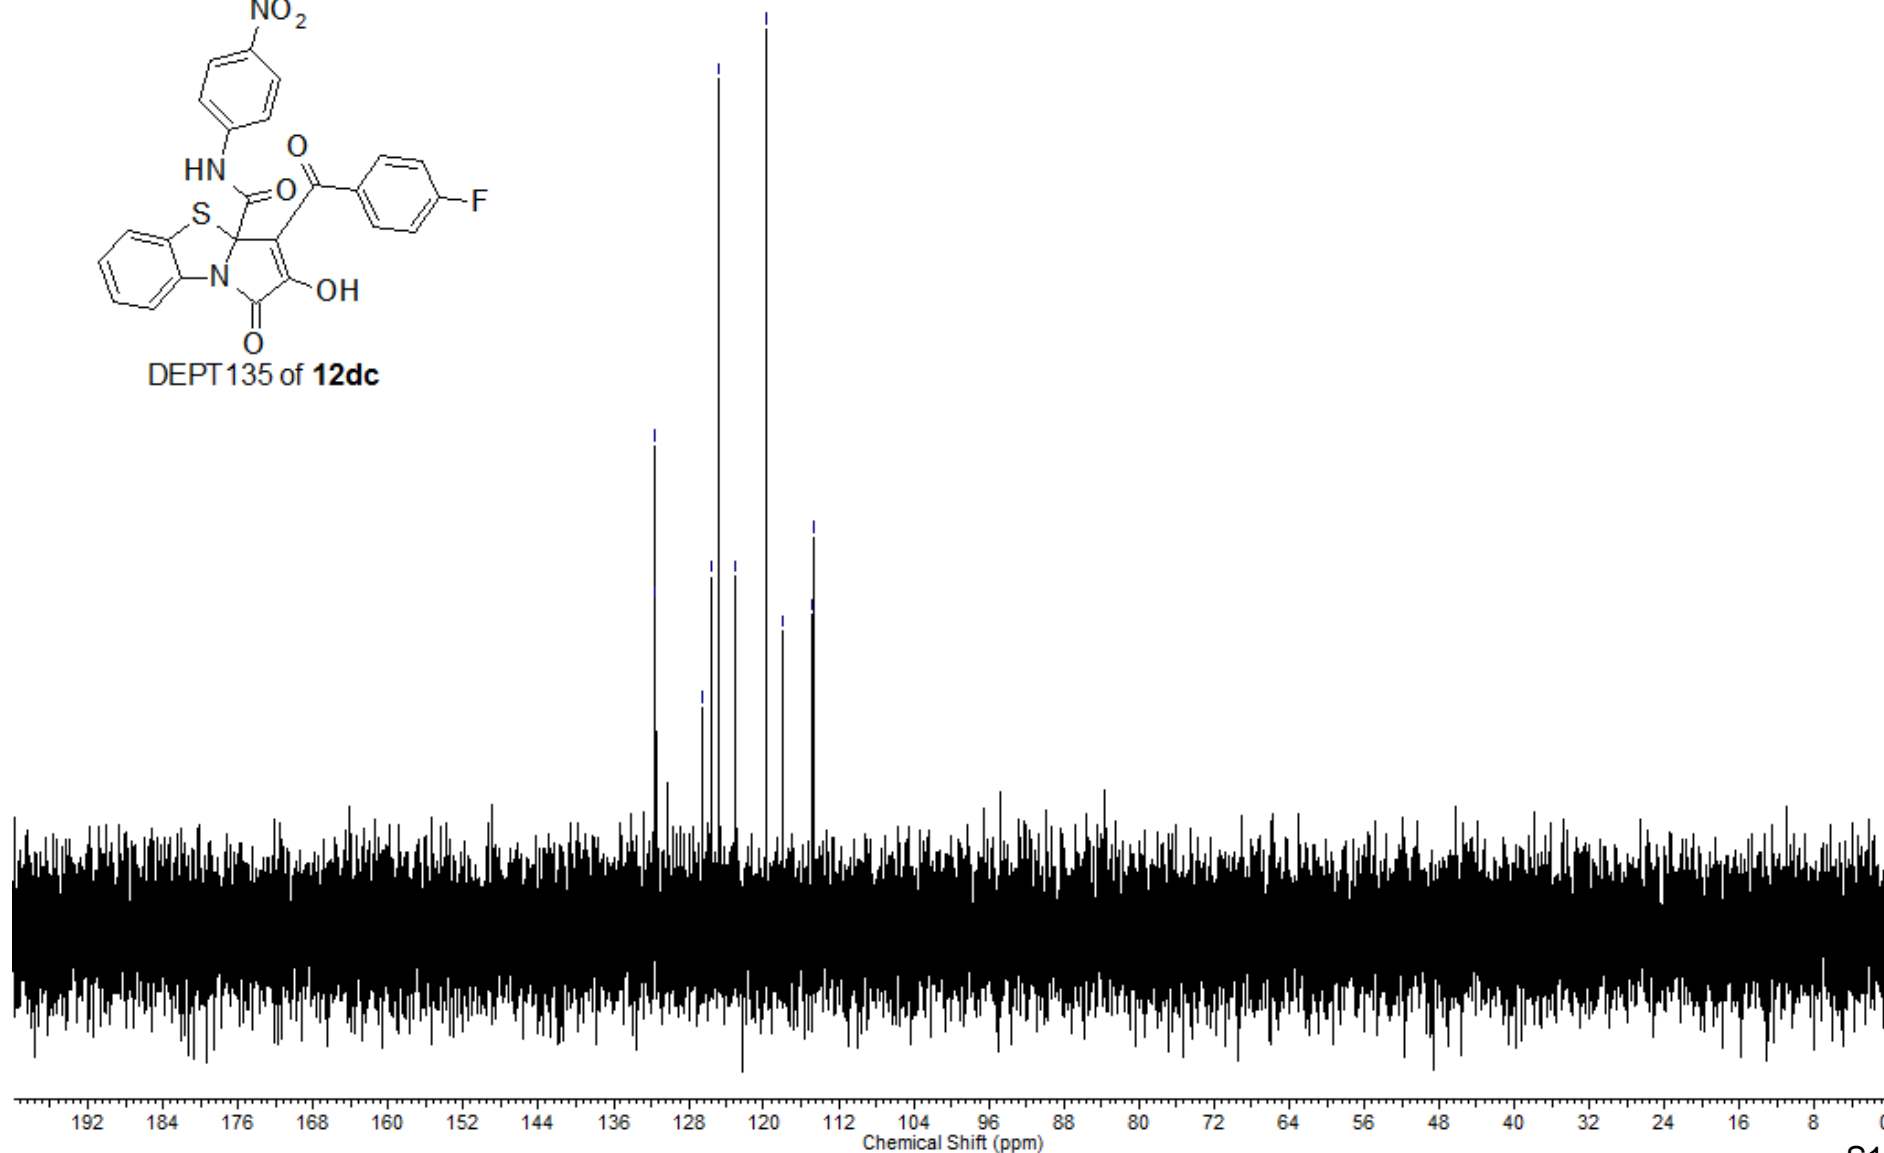

MAN7324.001.es

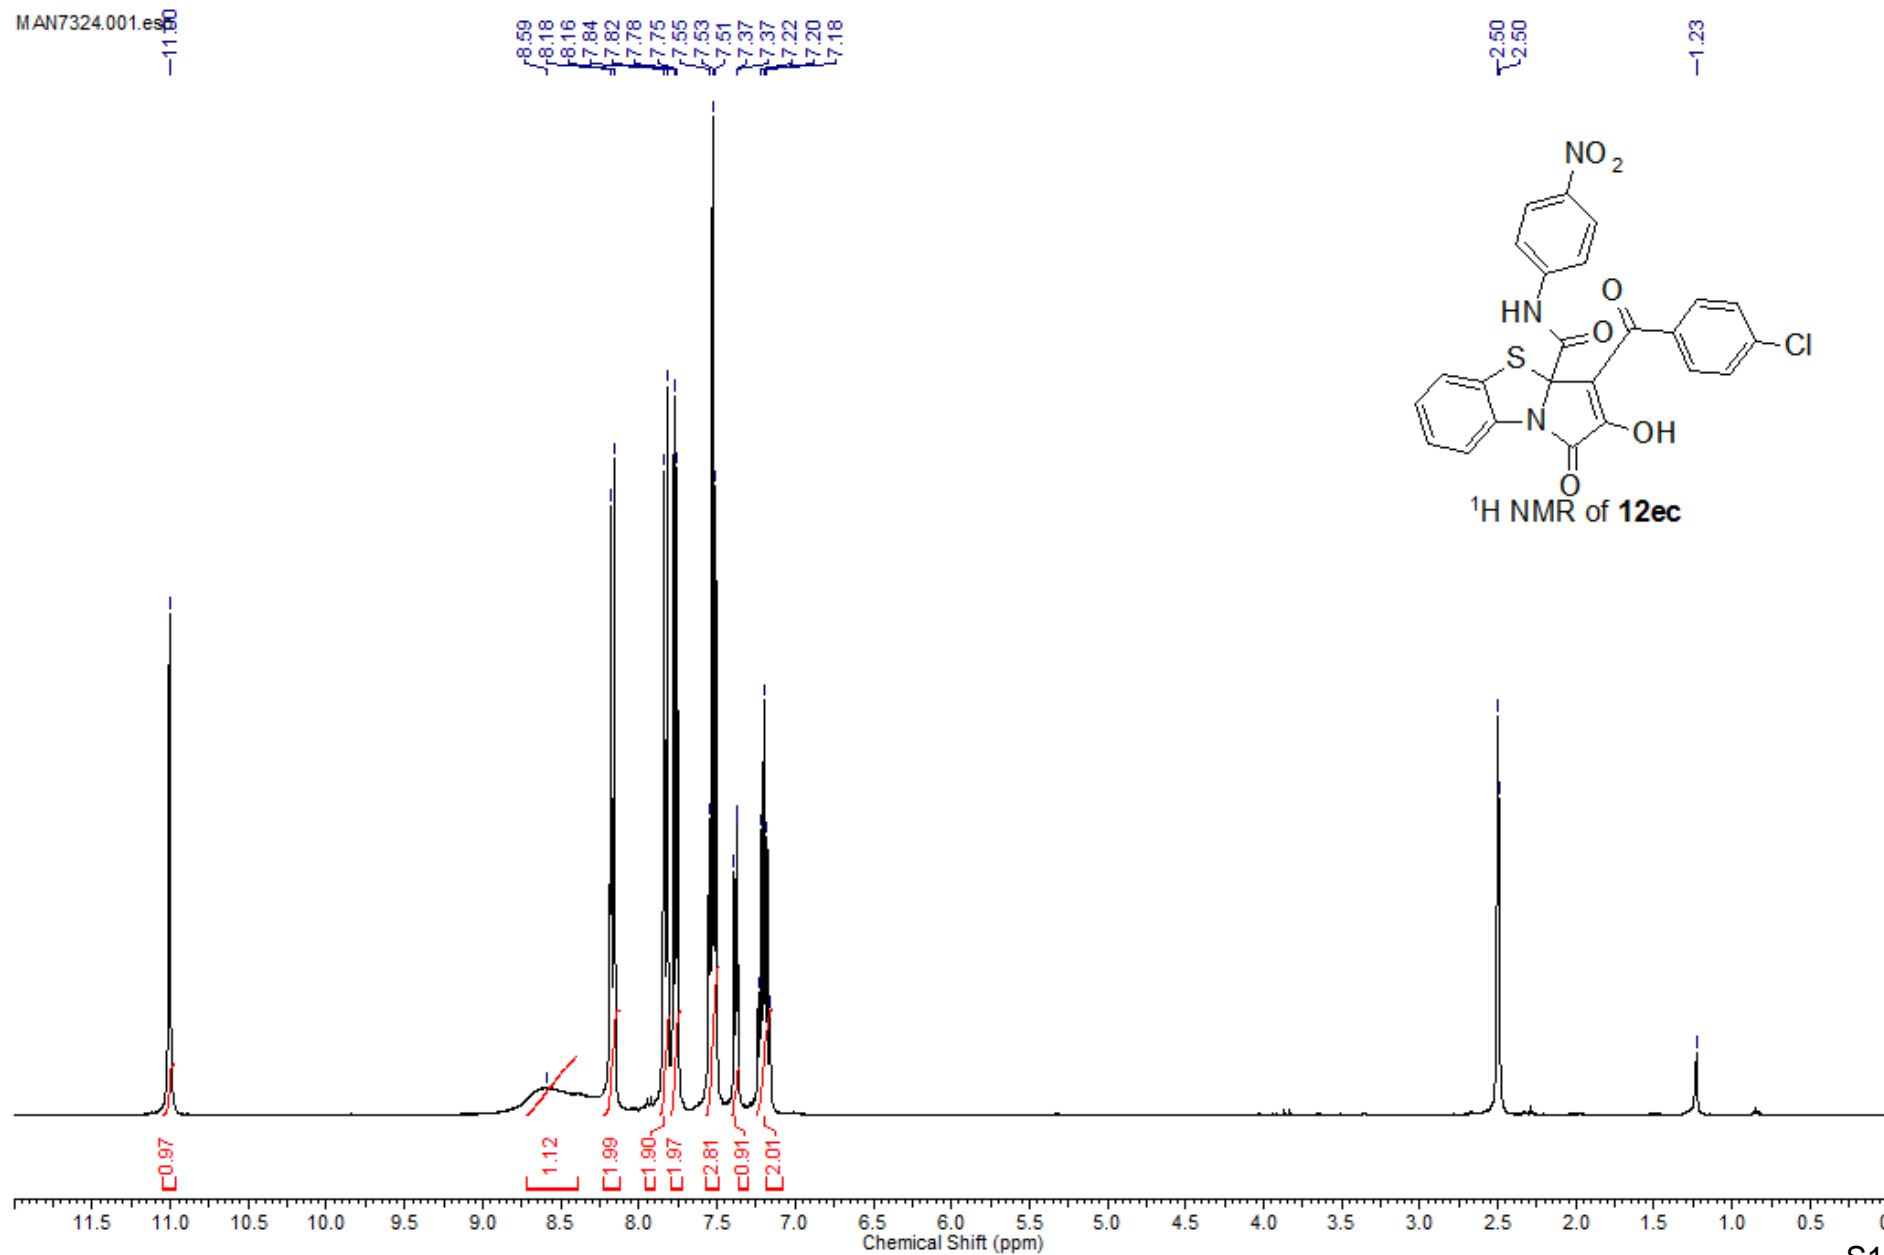

MAN7324.002.esp

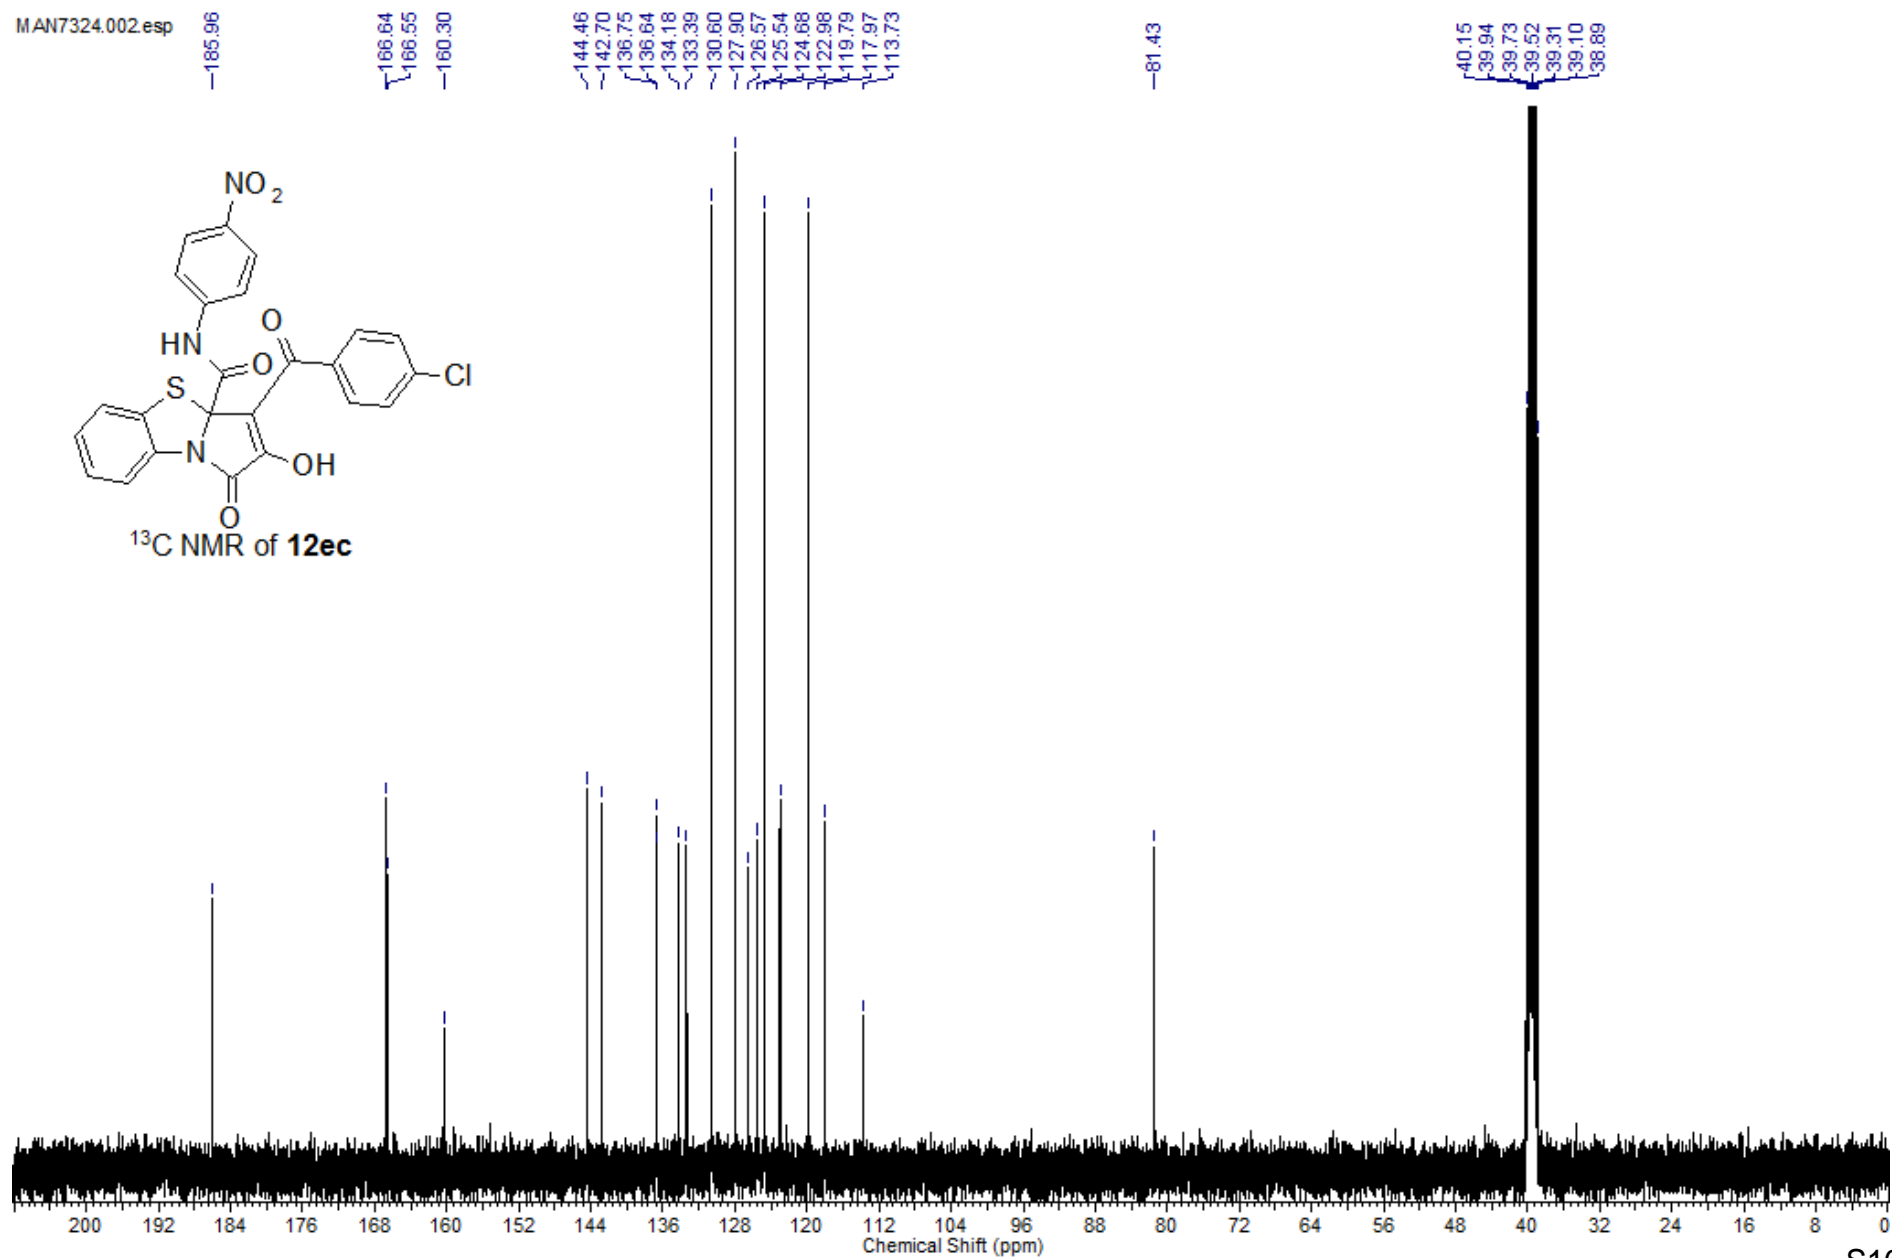

MAN7324.003.esp

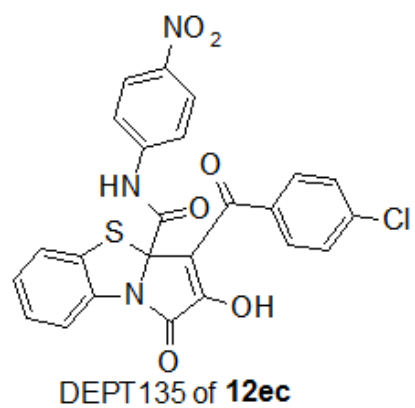

130.60  
127.90  
126.57  
125.53  
124.88  
122.98  
119.79  
117.97

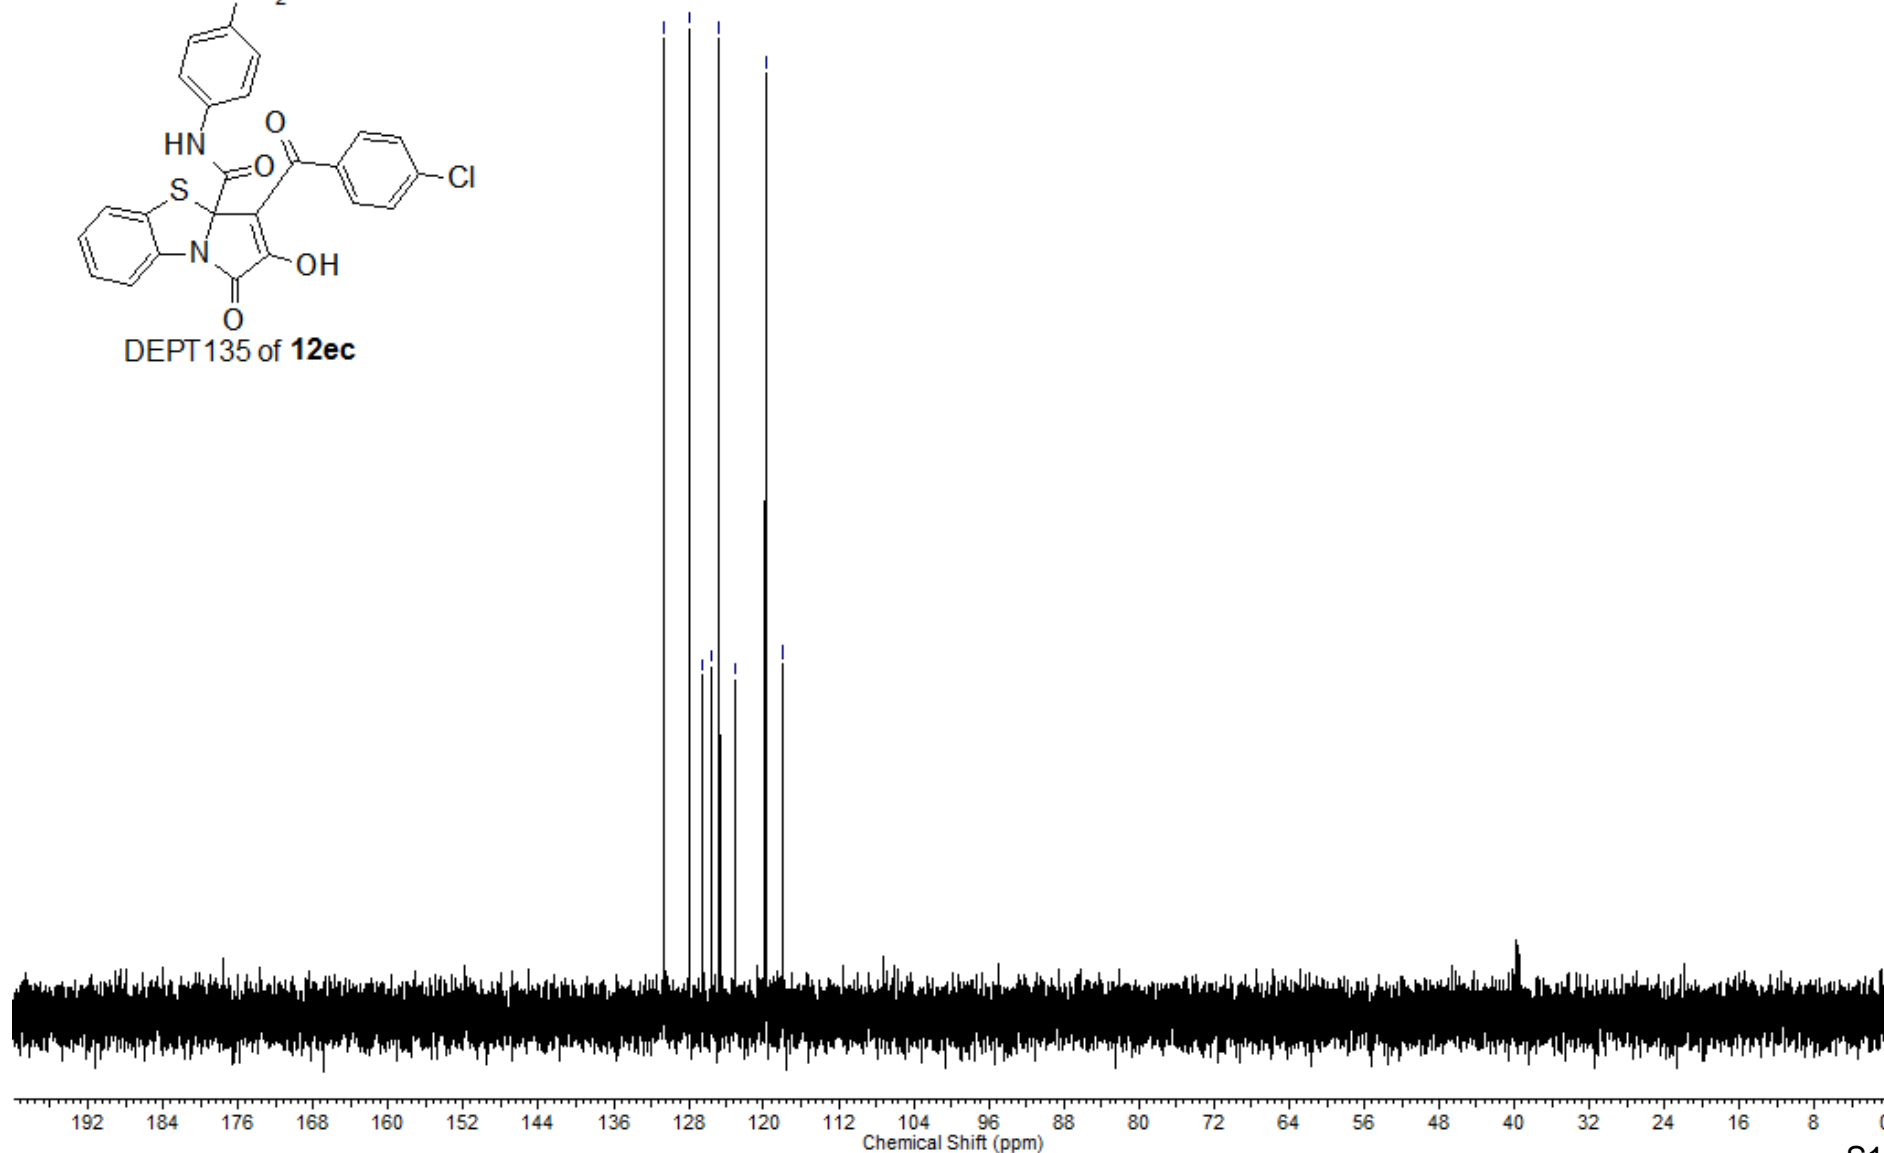

MAN7534.001.eb

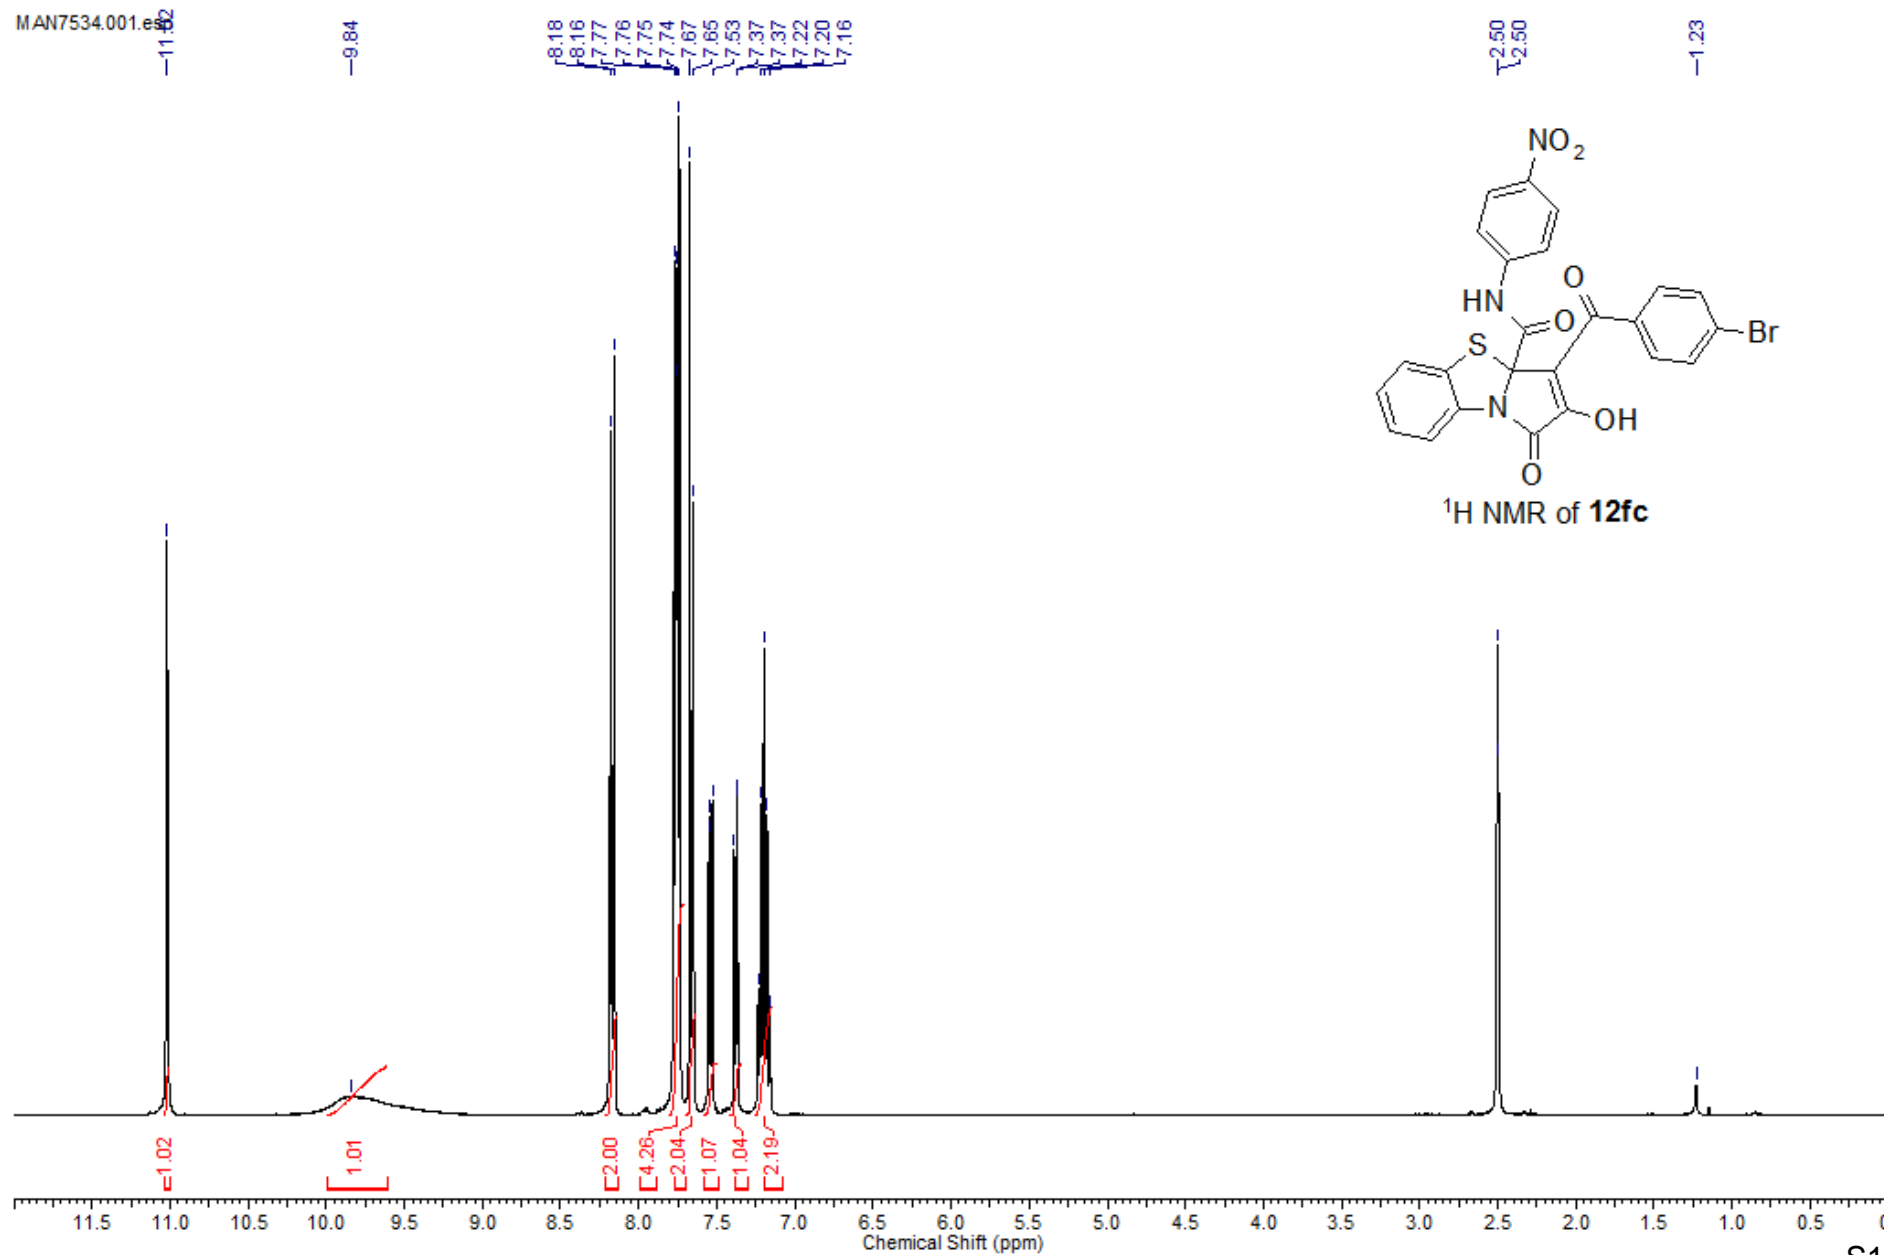

MAN7534.002.esp

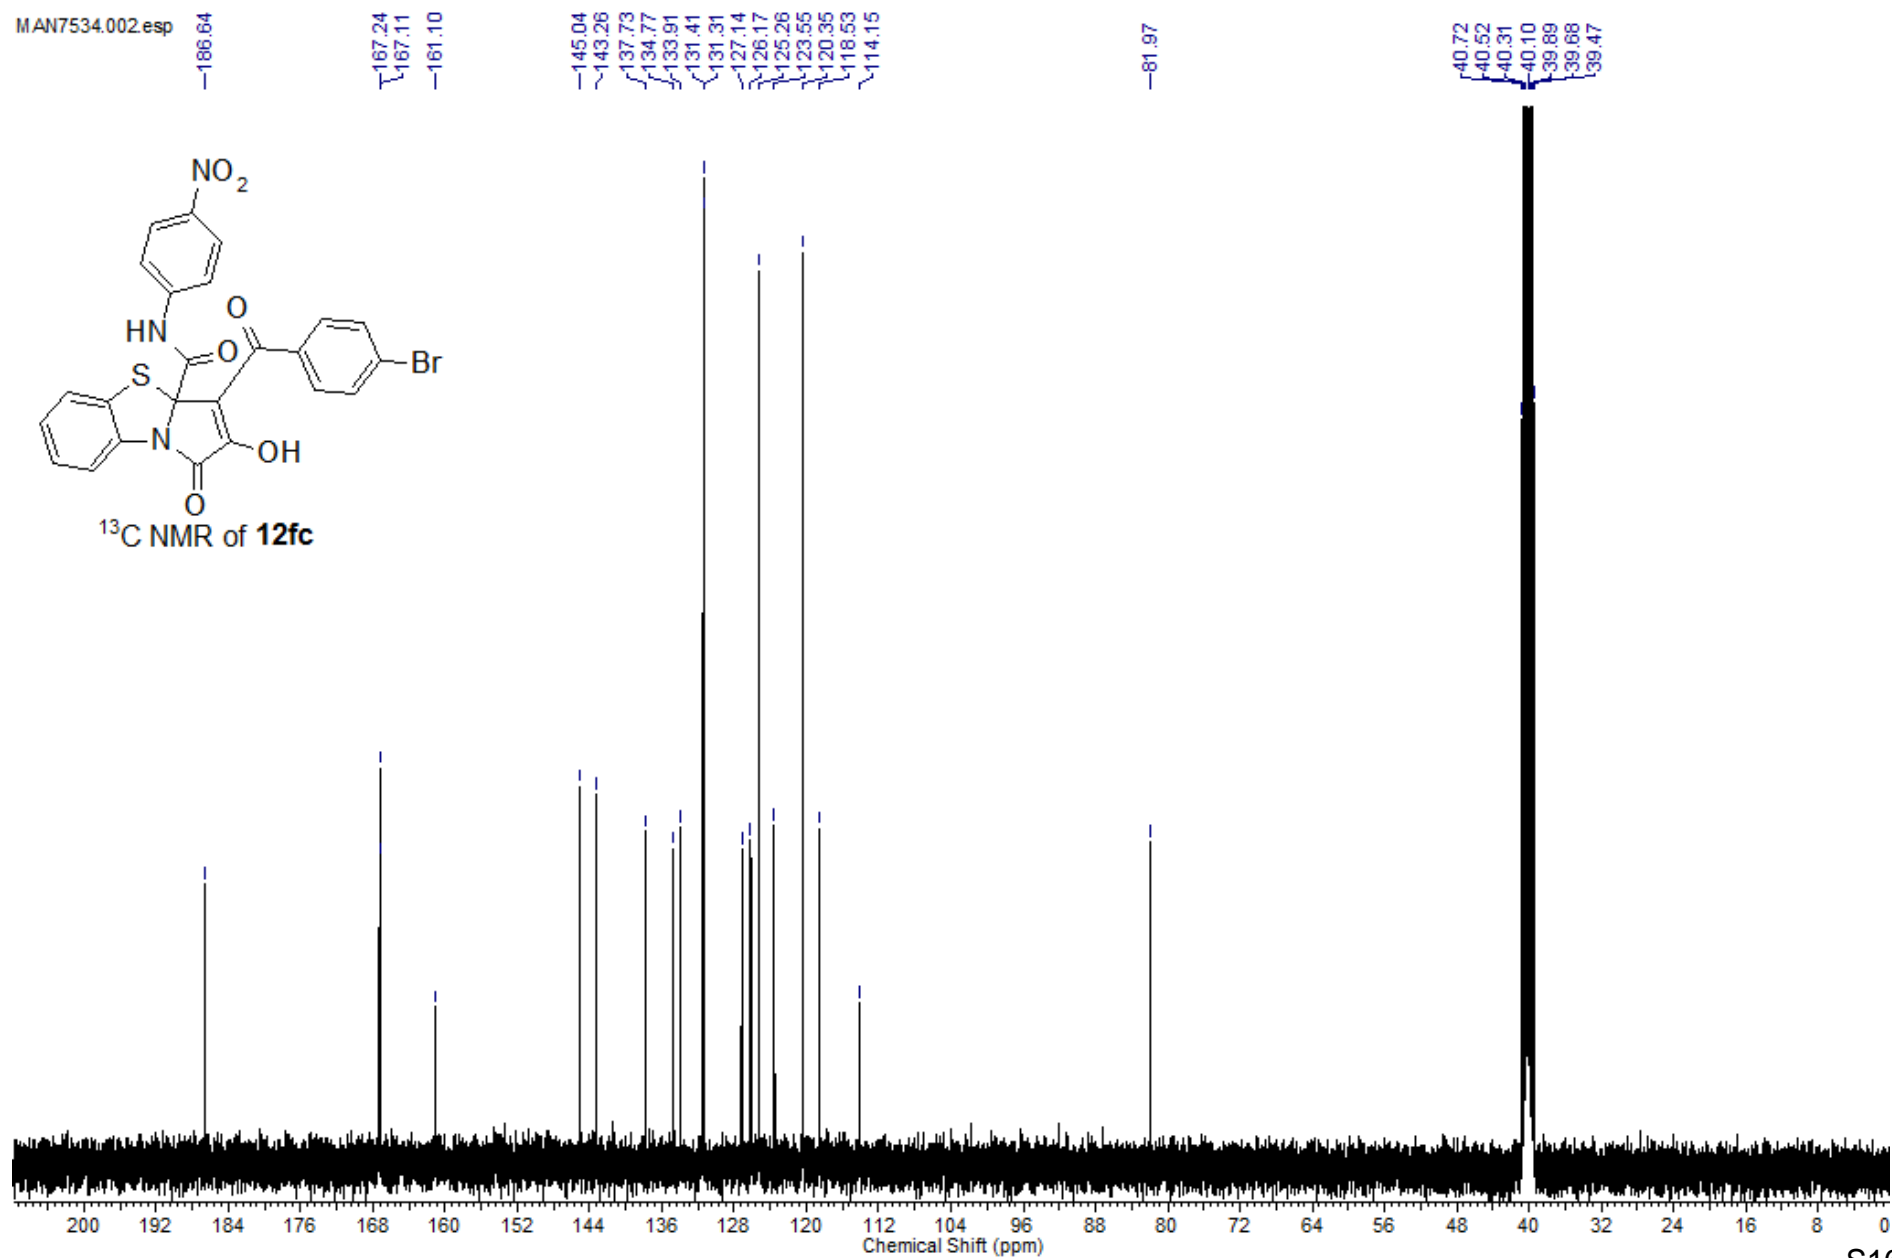

MAN7534.003.esp

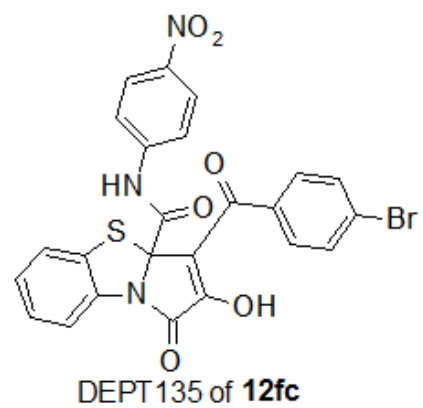

131.41  
131.31  
127.14  
126.11  
125.26  
123.55  
120.35  
118.53

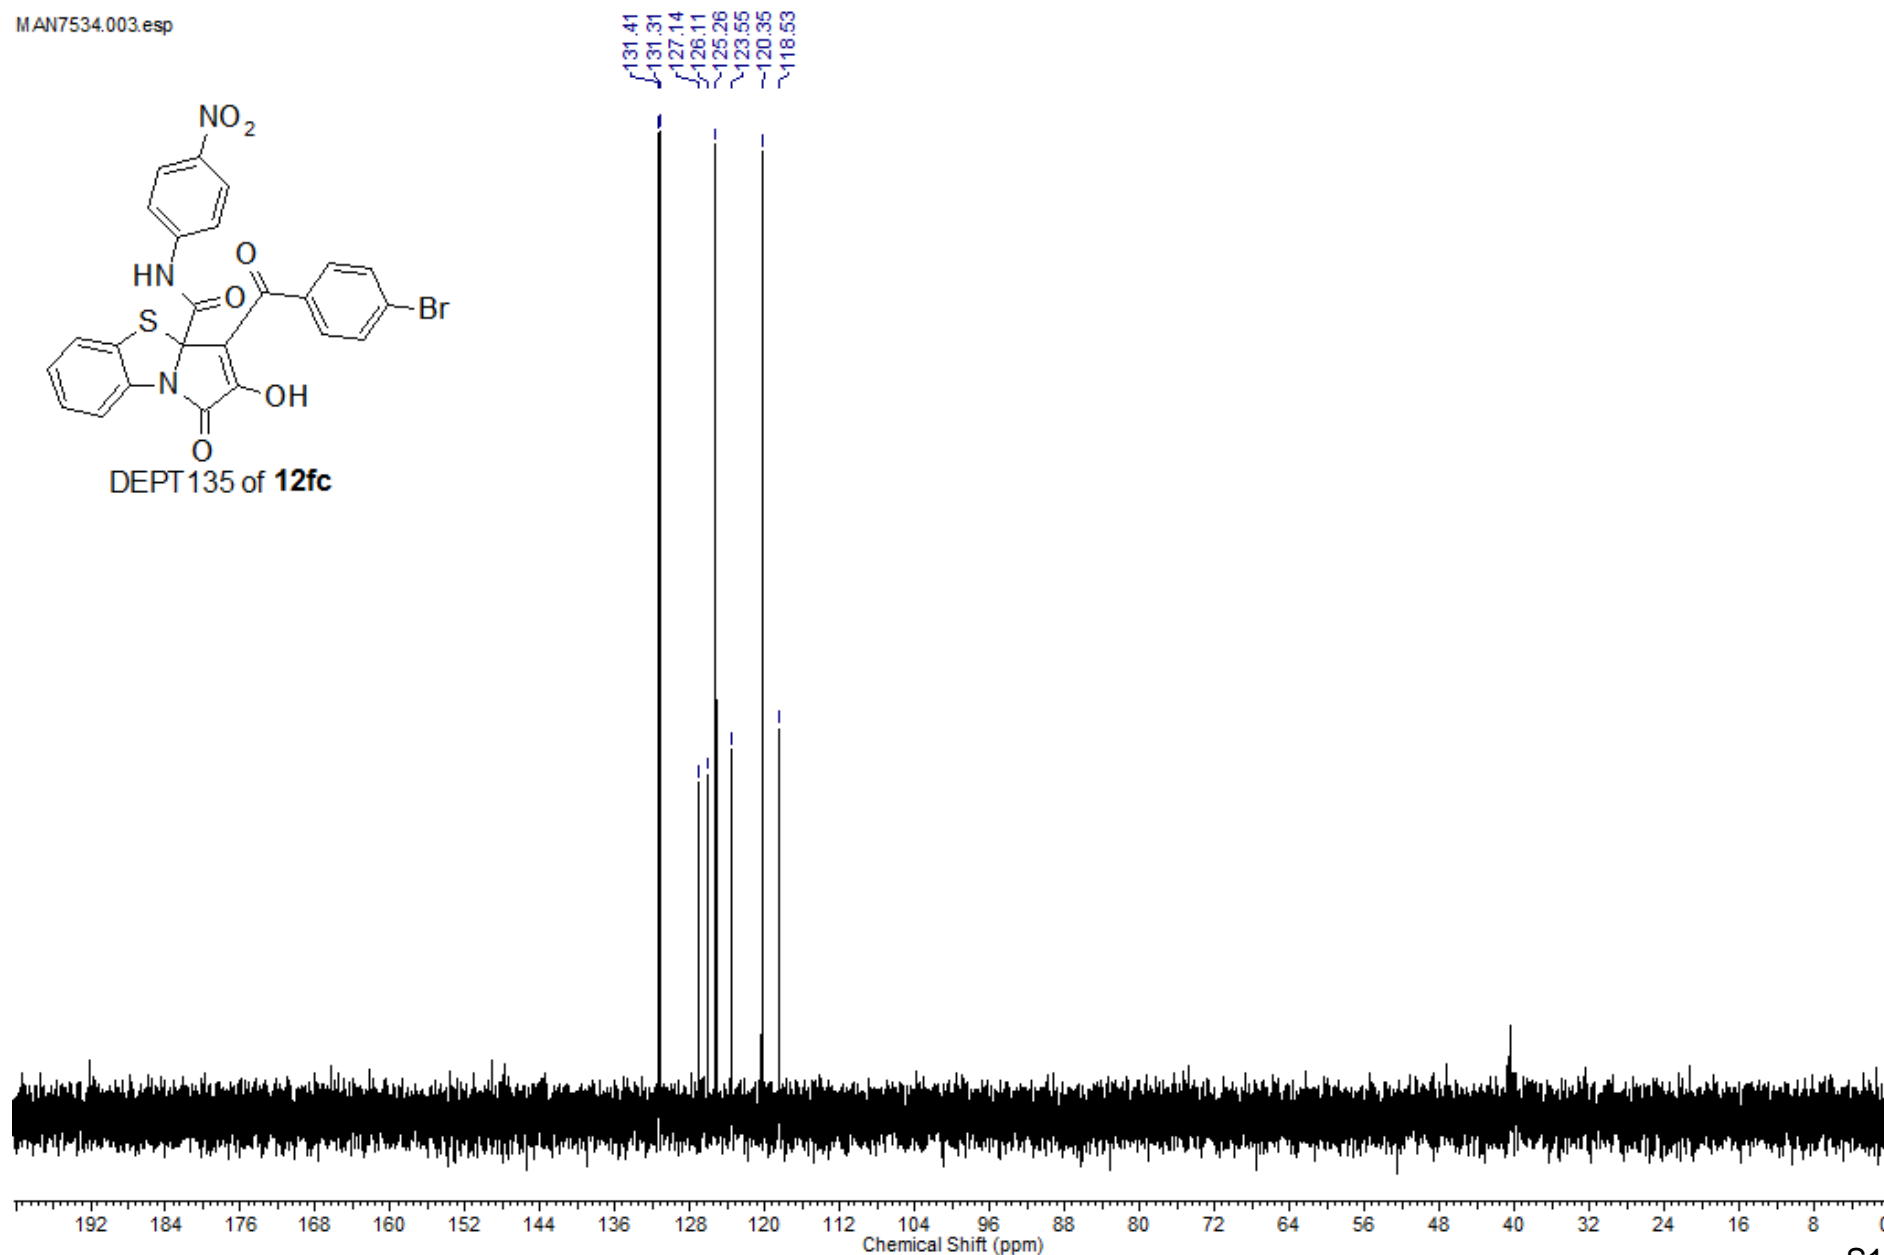

S168



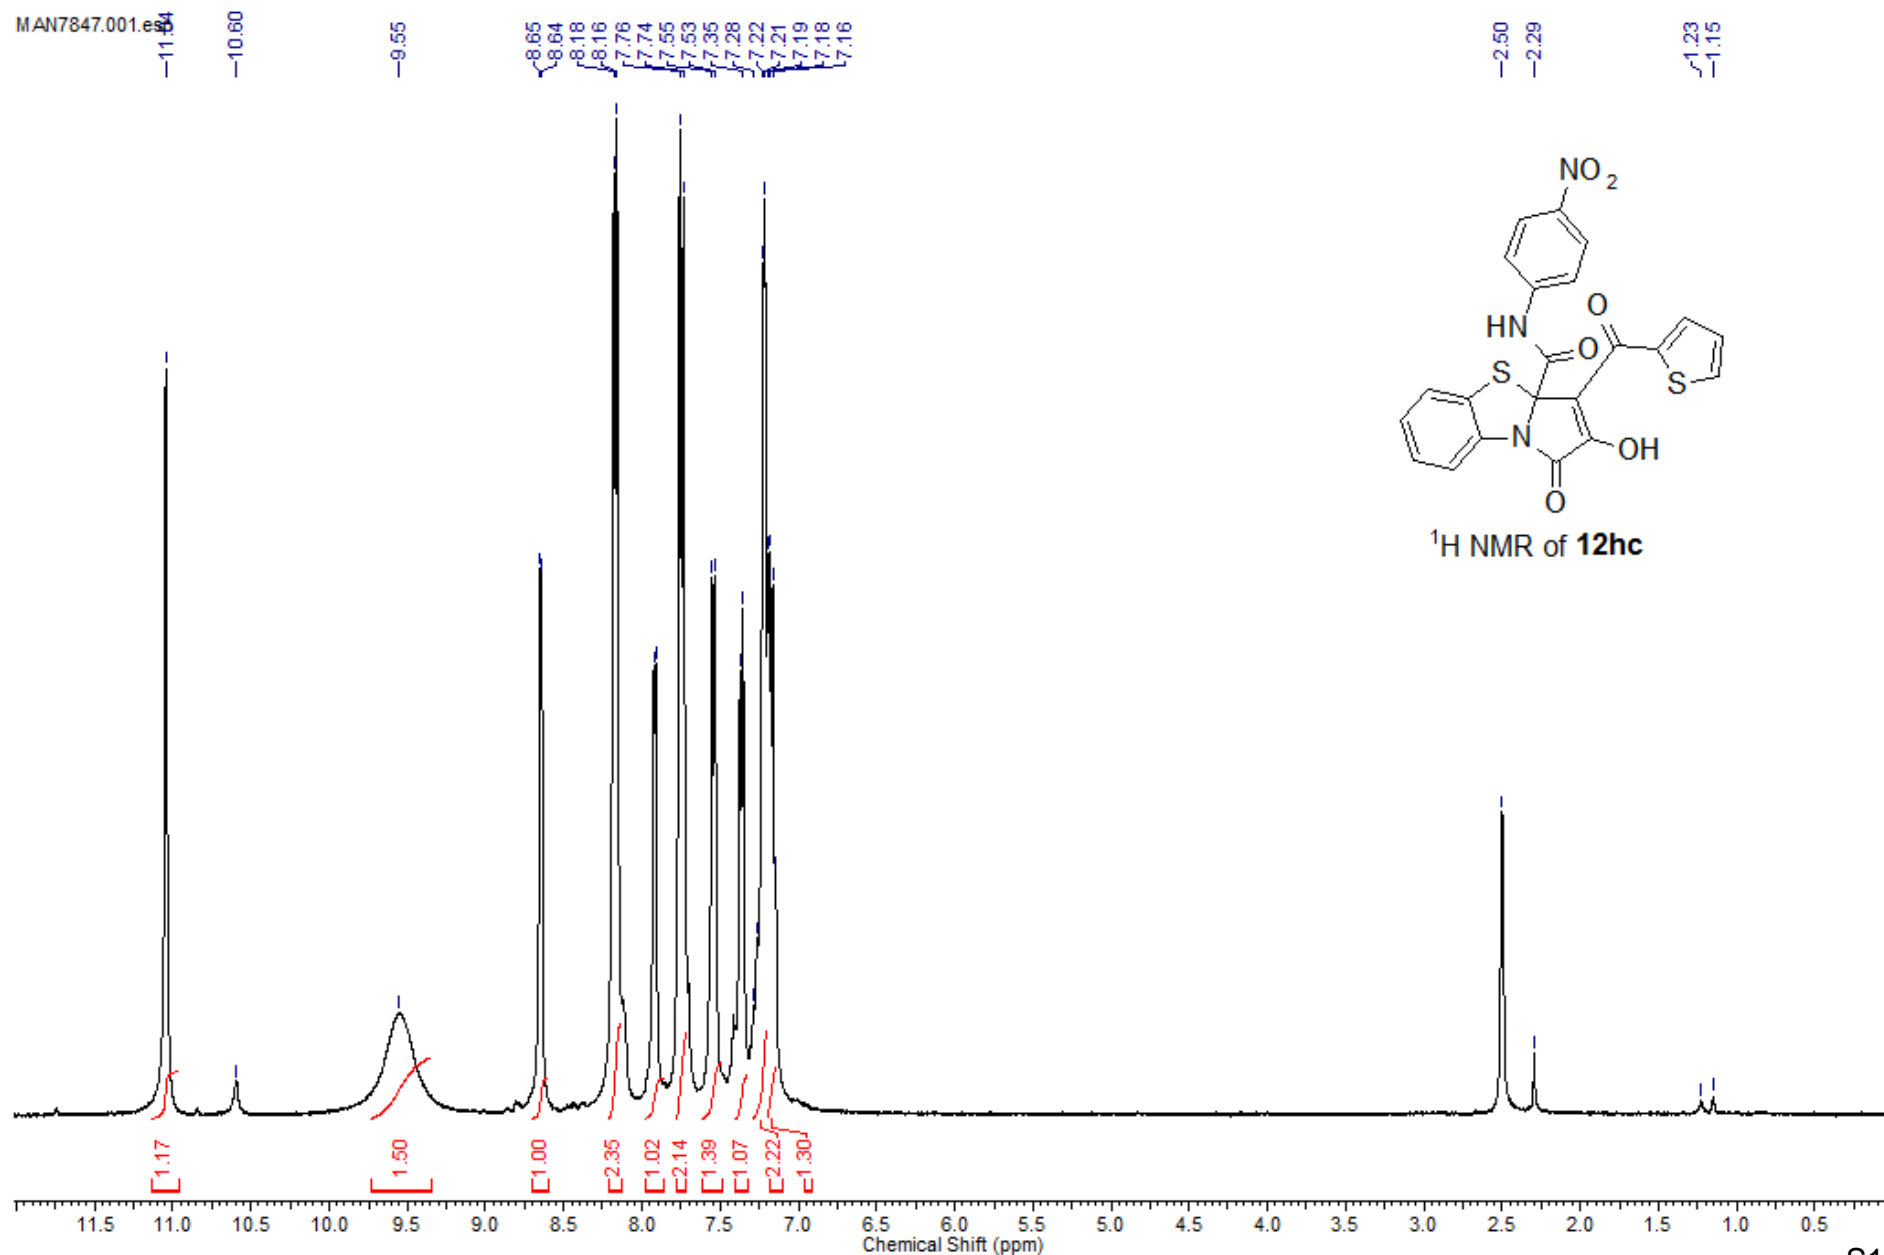

MAN7847.002.esp

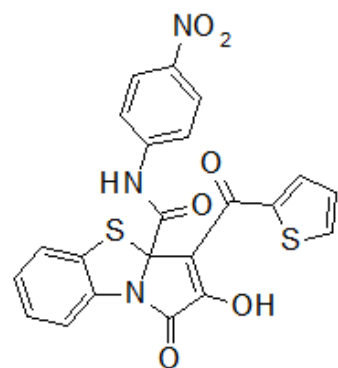

<sup>13</sup>C NMR of 12hc

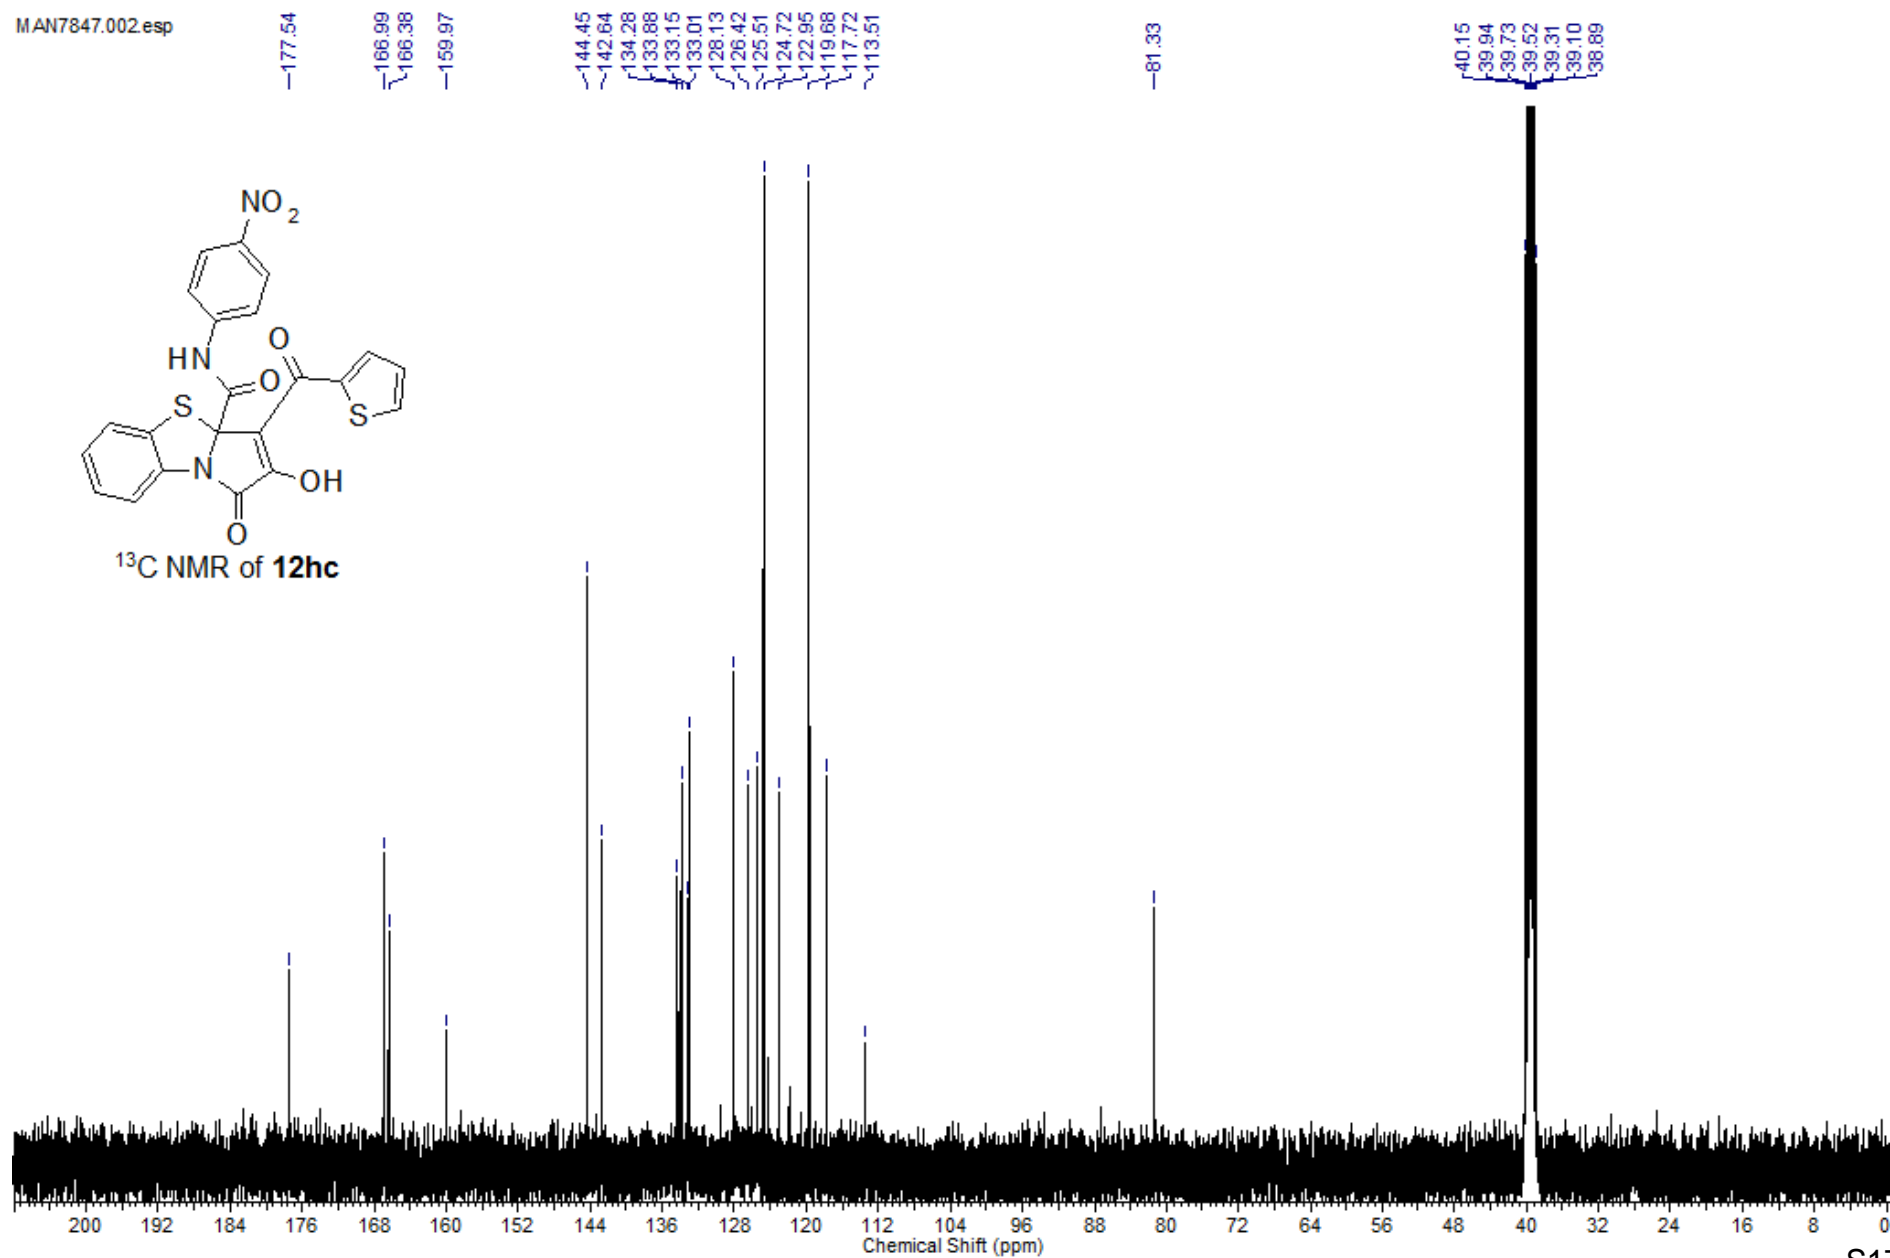

MAN7847.003.esp

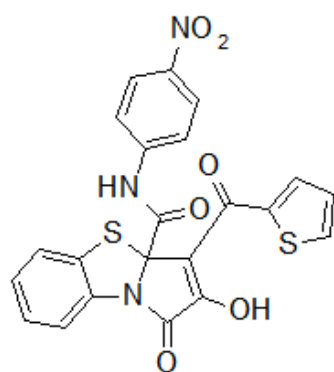

133.89  
133.01  
126.13  
126.42  
125.51  
124.72  
122.94  
119.68  
117.72

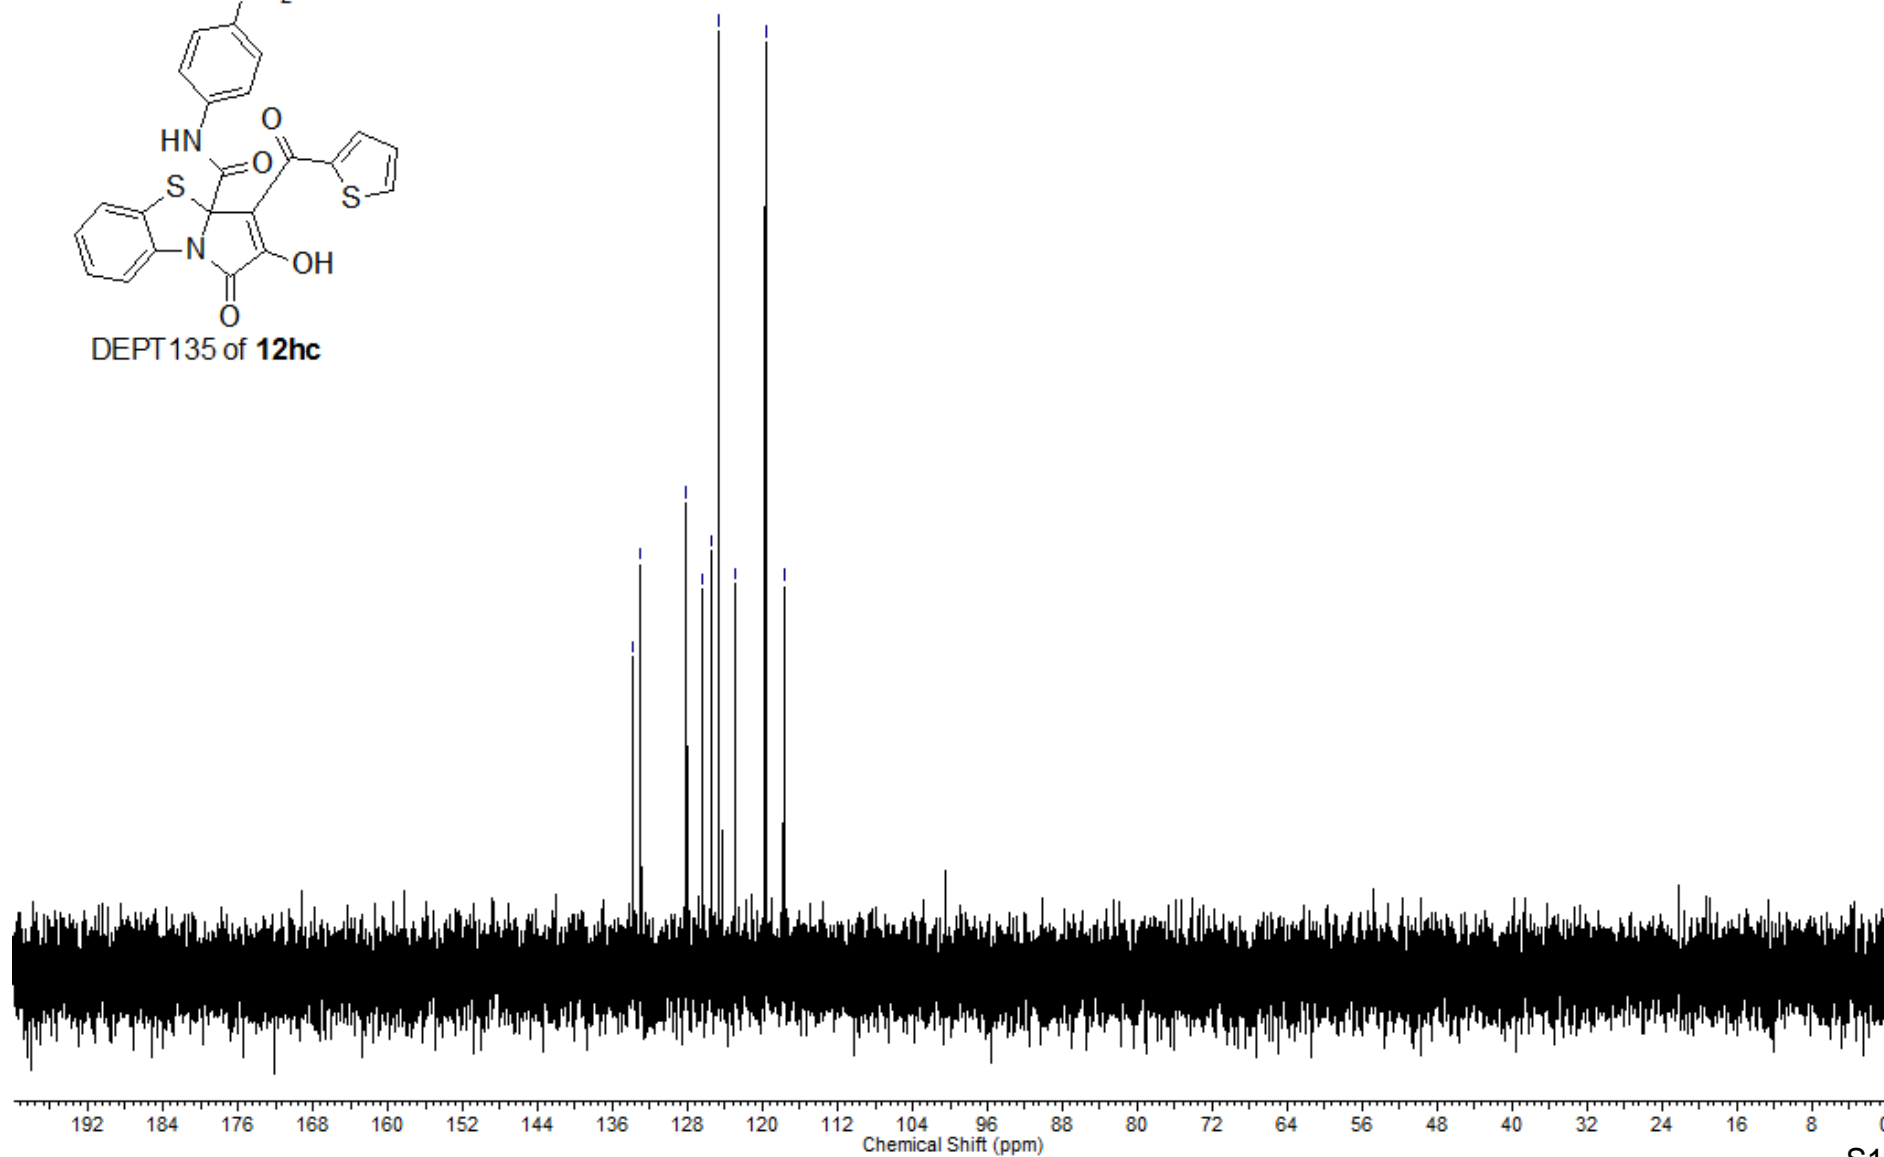

MAN7608.001.esp

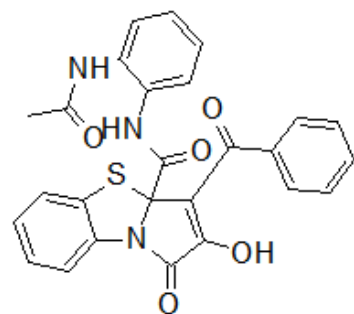

<sup>1</sup>H NMR of 12ad

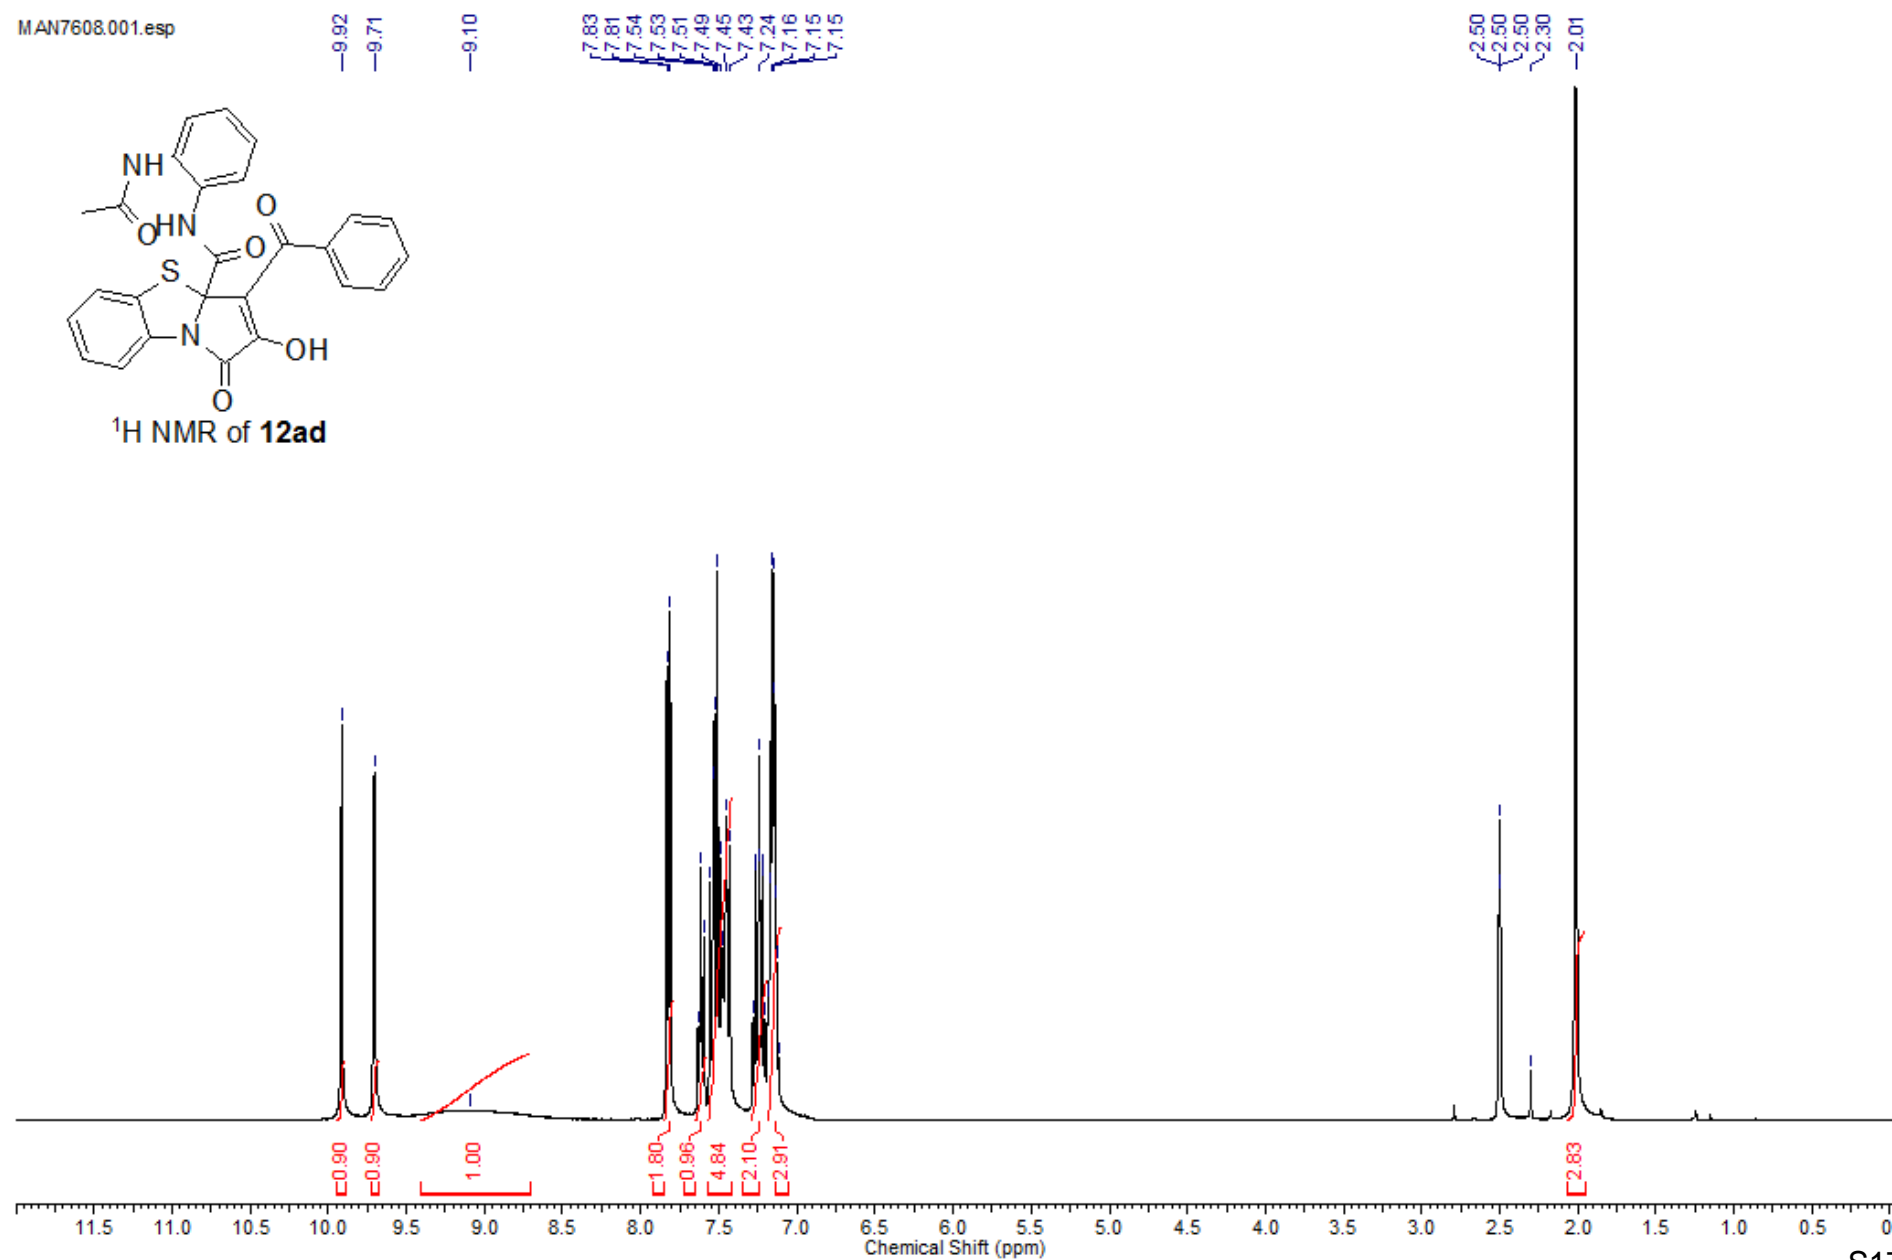

MAN7608.002.esp

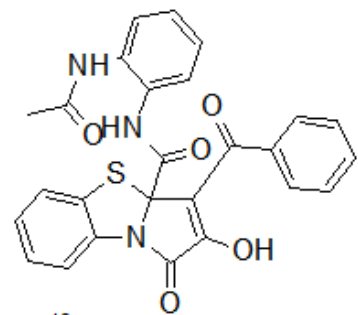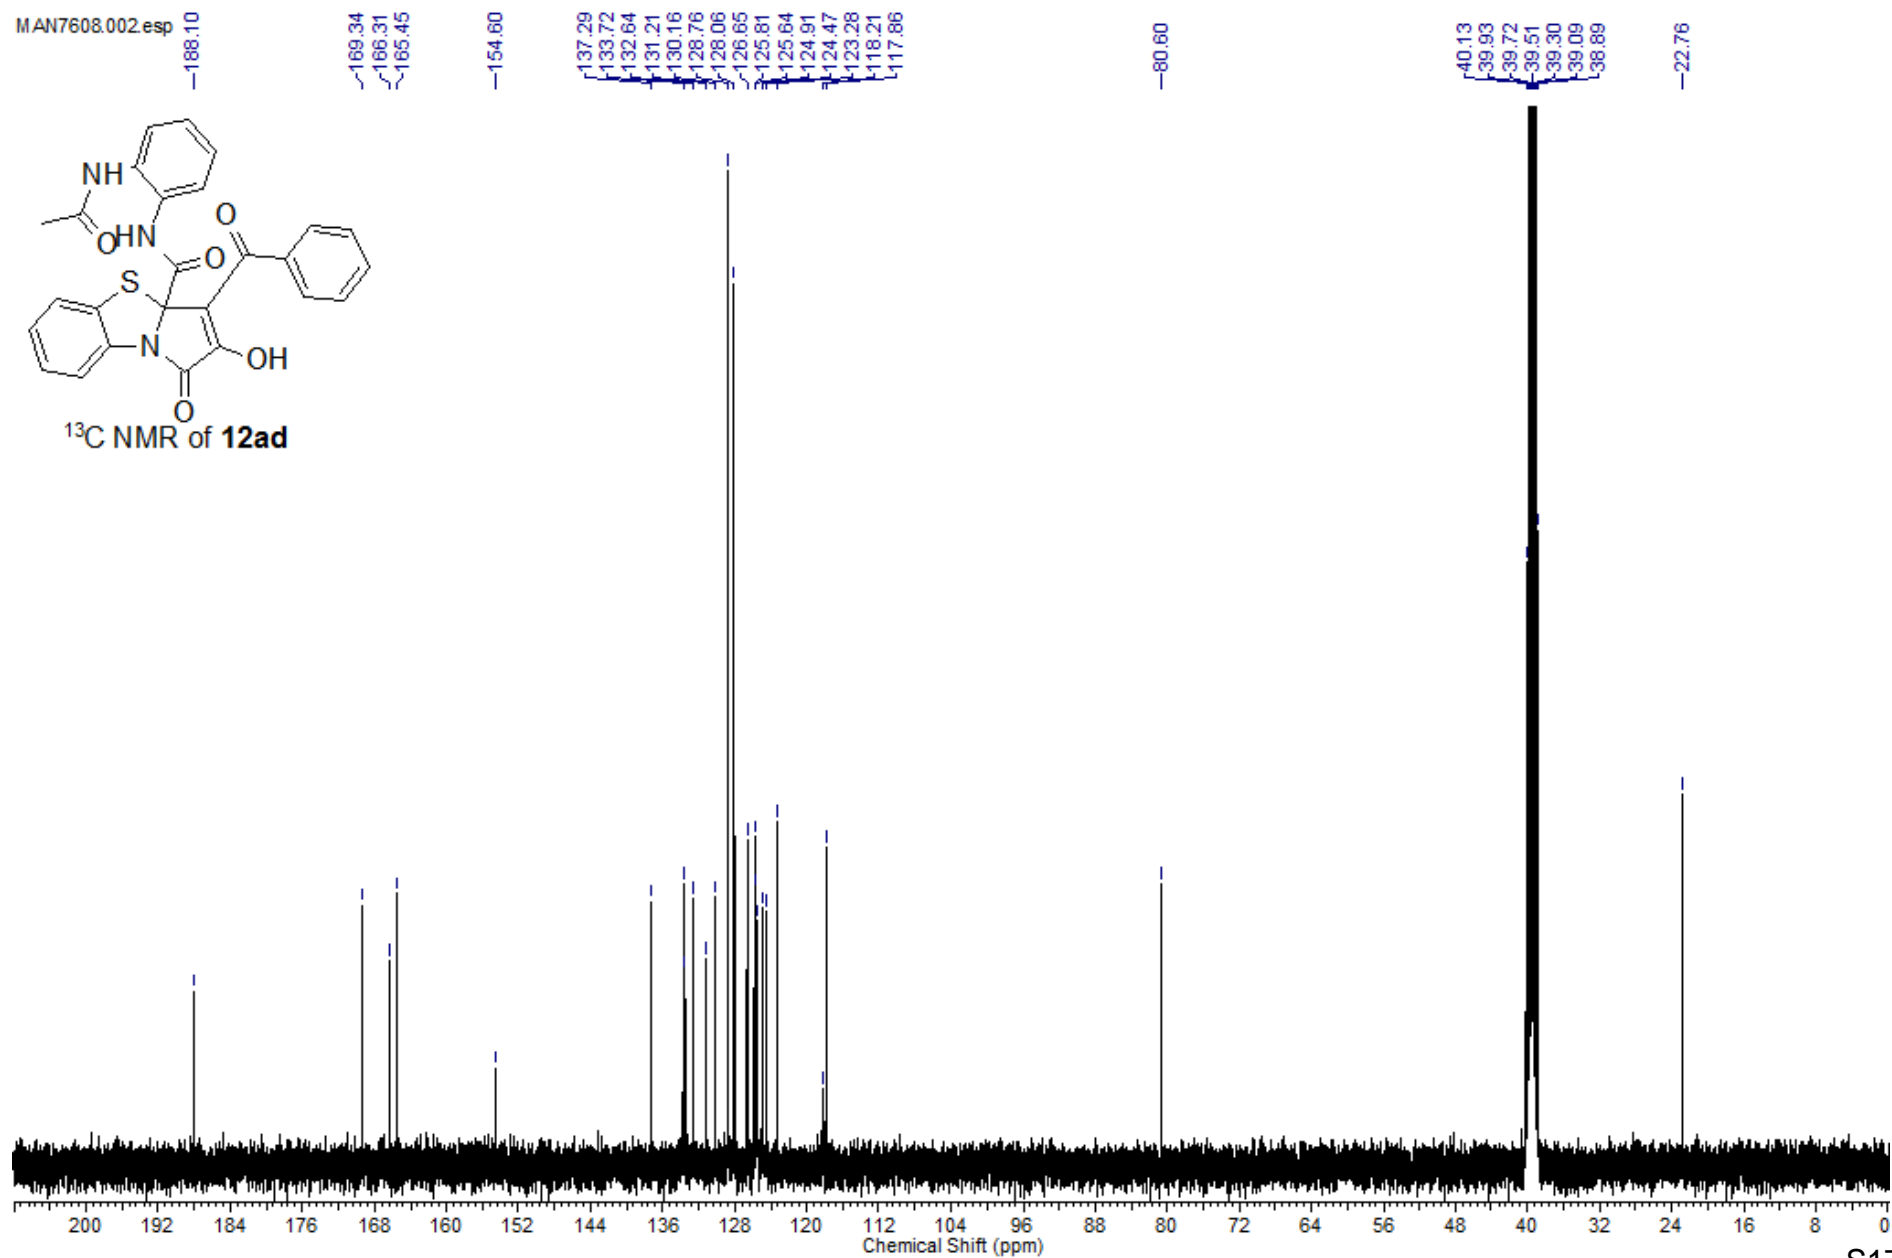

MAN7608.003.esp

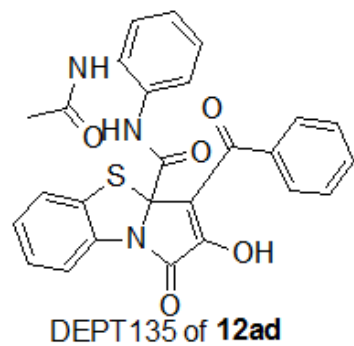

132.63  
128.76  
128.06  
126.65  
125.81  
125.64  
125.49  
124.91  
124.46  
123.27  
117.86

-22.76

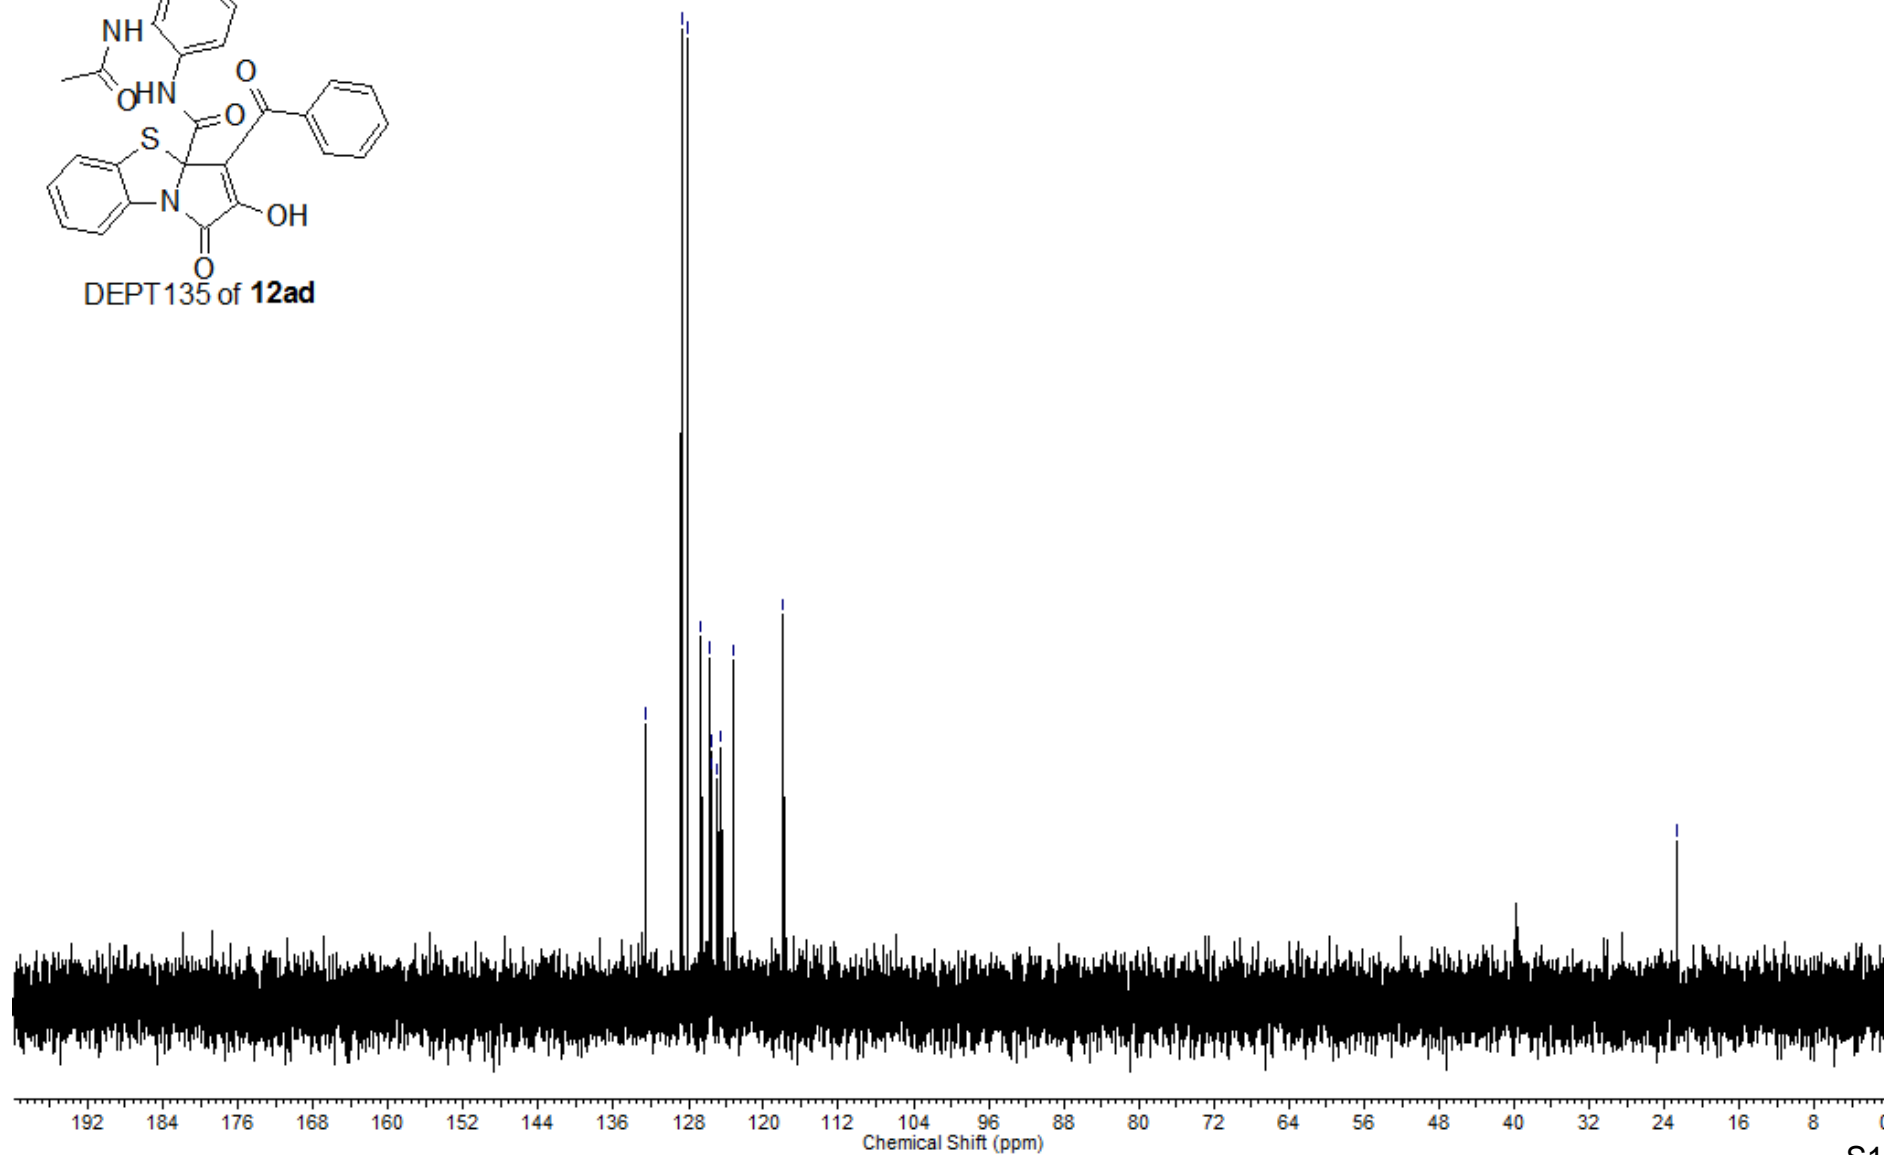

MAN7629.001.esp

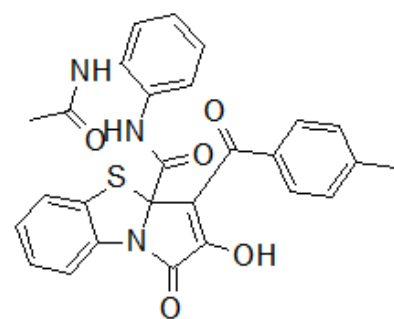

<sup>1</sup>H NMR of 12bd

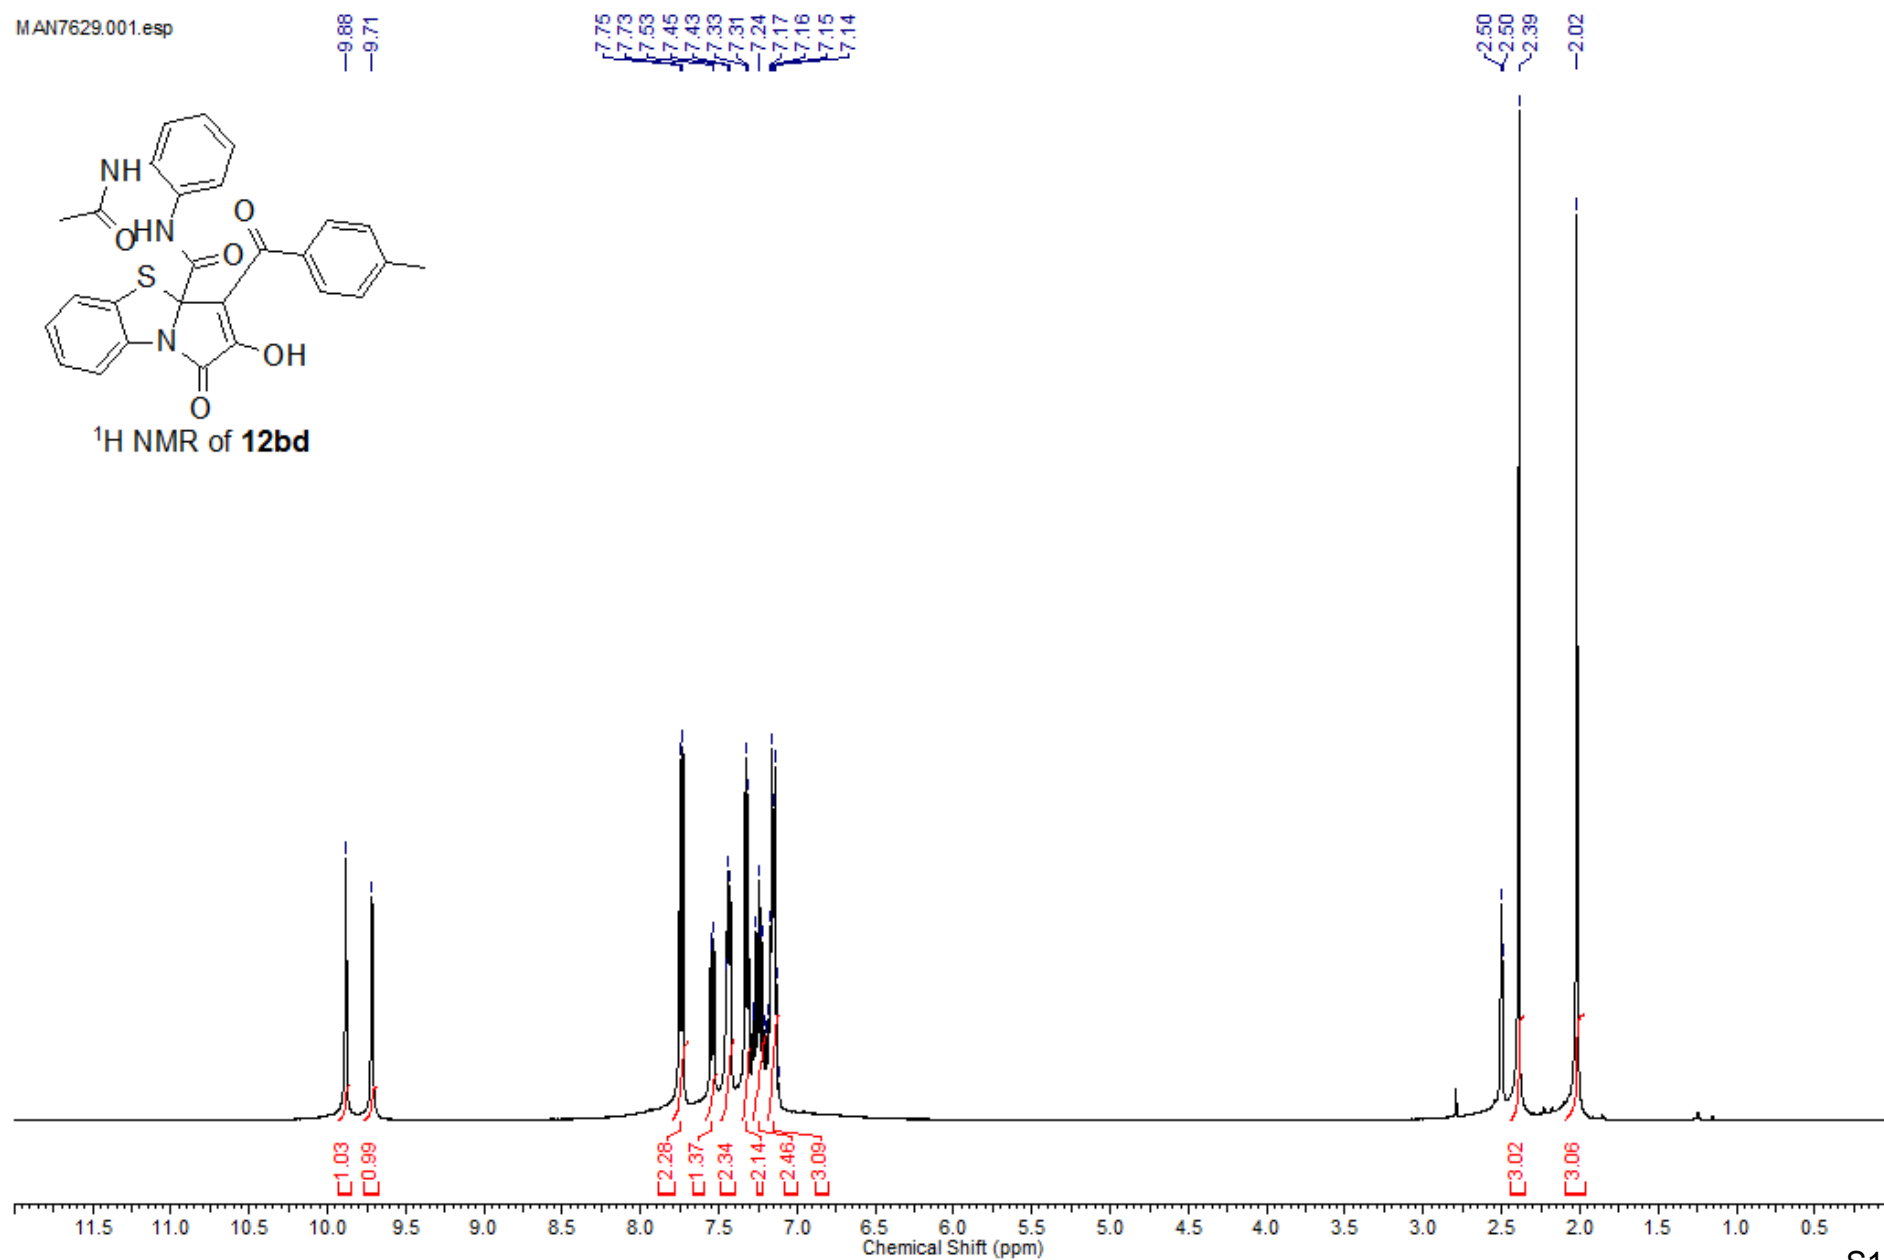

MAN7629.002.esp

188.38

169.94

166.98

165.99

154.14

143.85

135.16

134.27

130.78

129.57

129.27

127.24

126.39

126.21

126.12

125.44

125.12

123.85

119.24

118.50

81.23

40.73

40.52

40.31

40.10

39.89

39.68

39.47

23.35

21.69

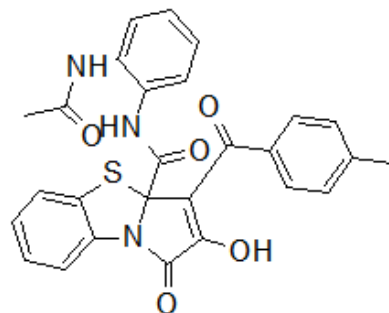

<sup>13</sup>C NMR of **12bd**

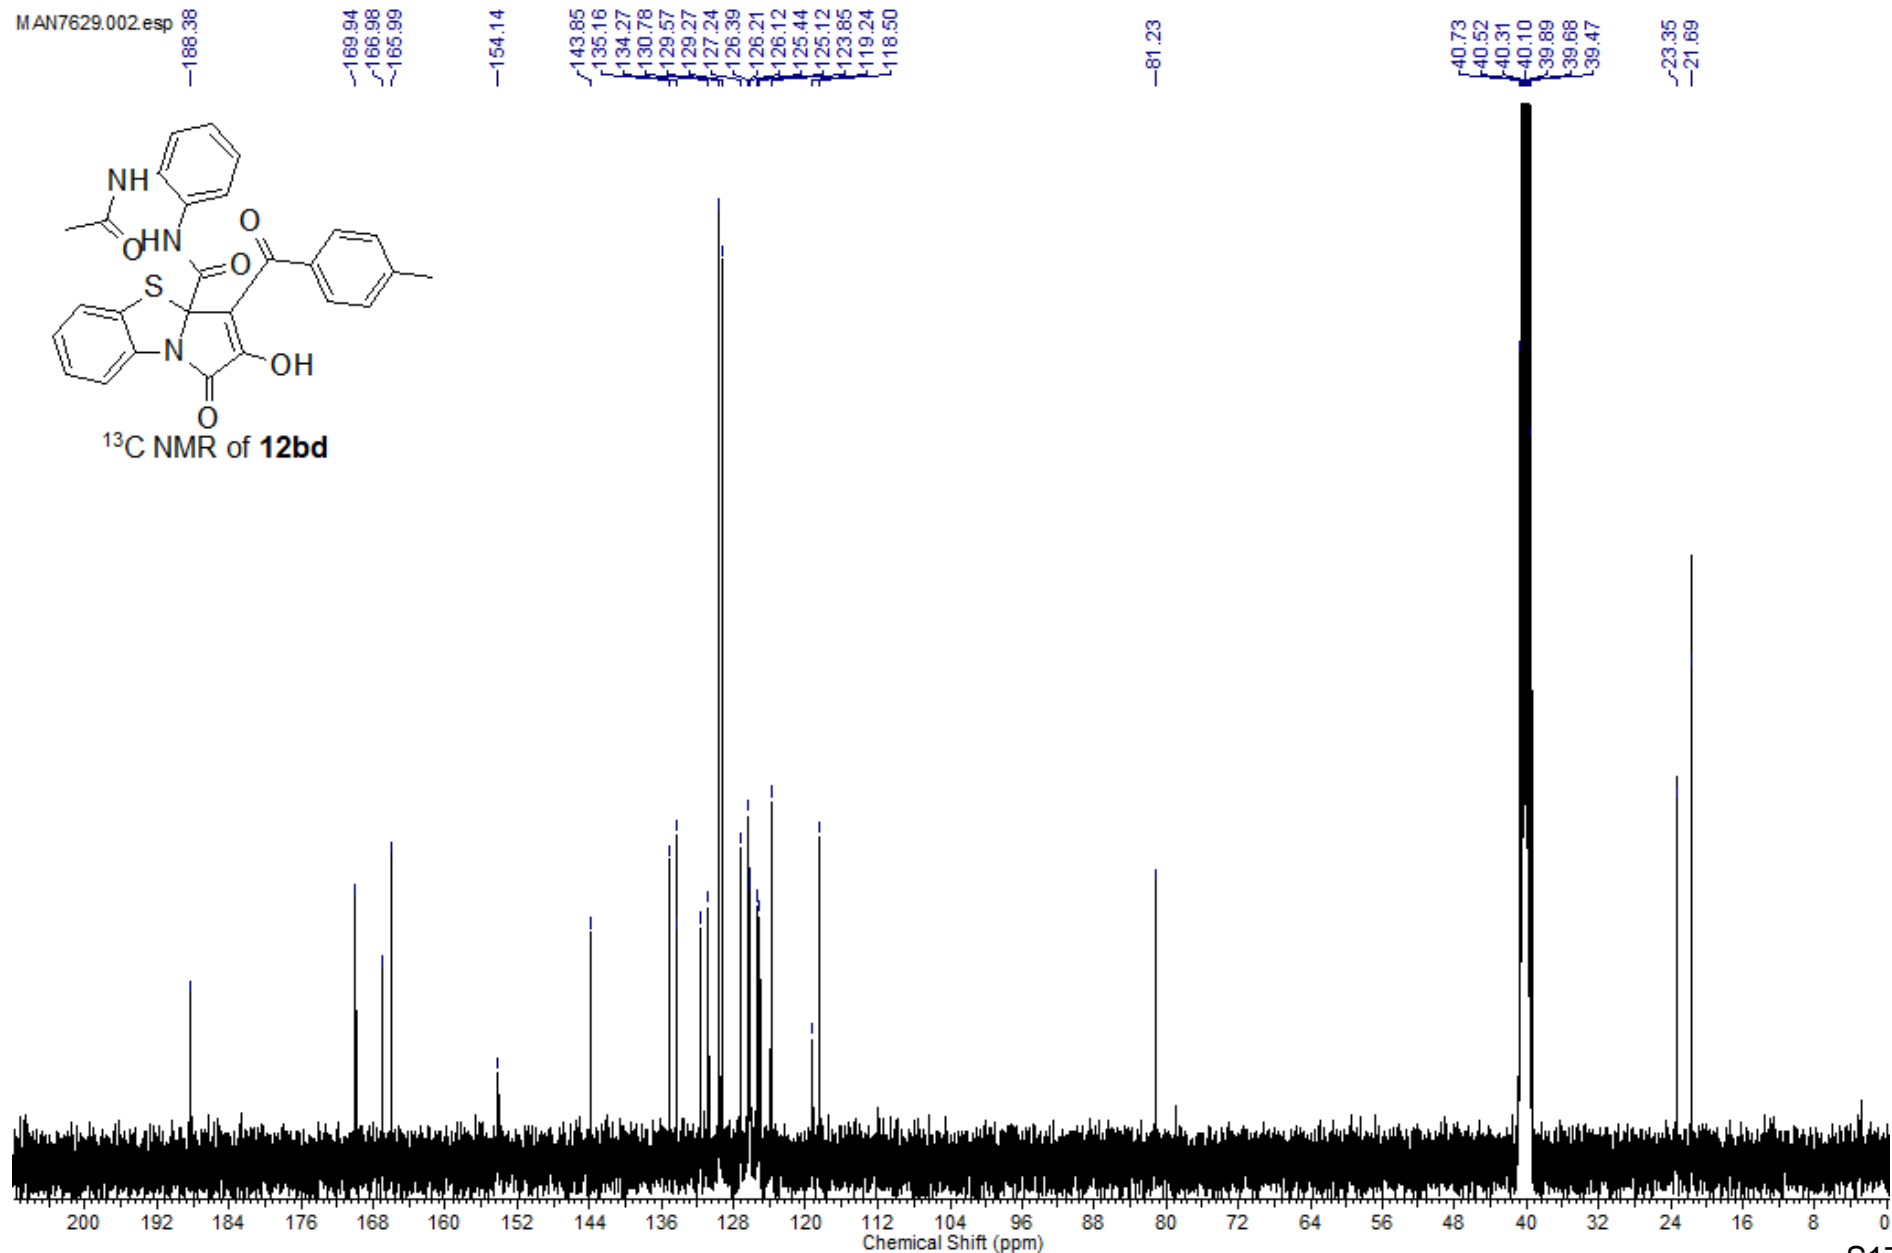



MAN7629.003.esp

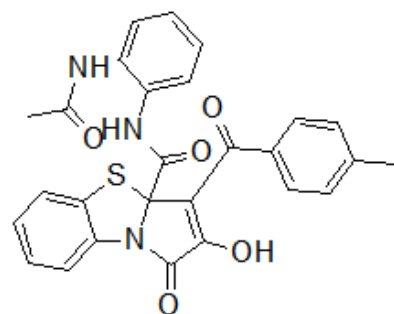

DEPT135 of 12bd

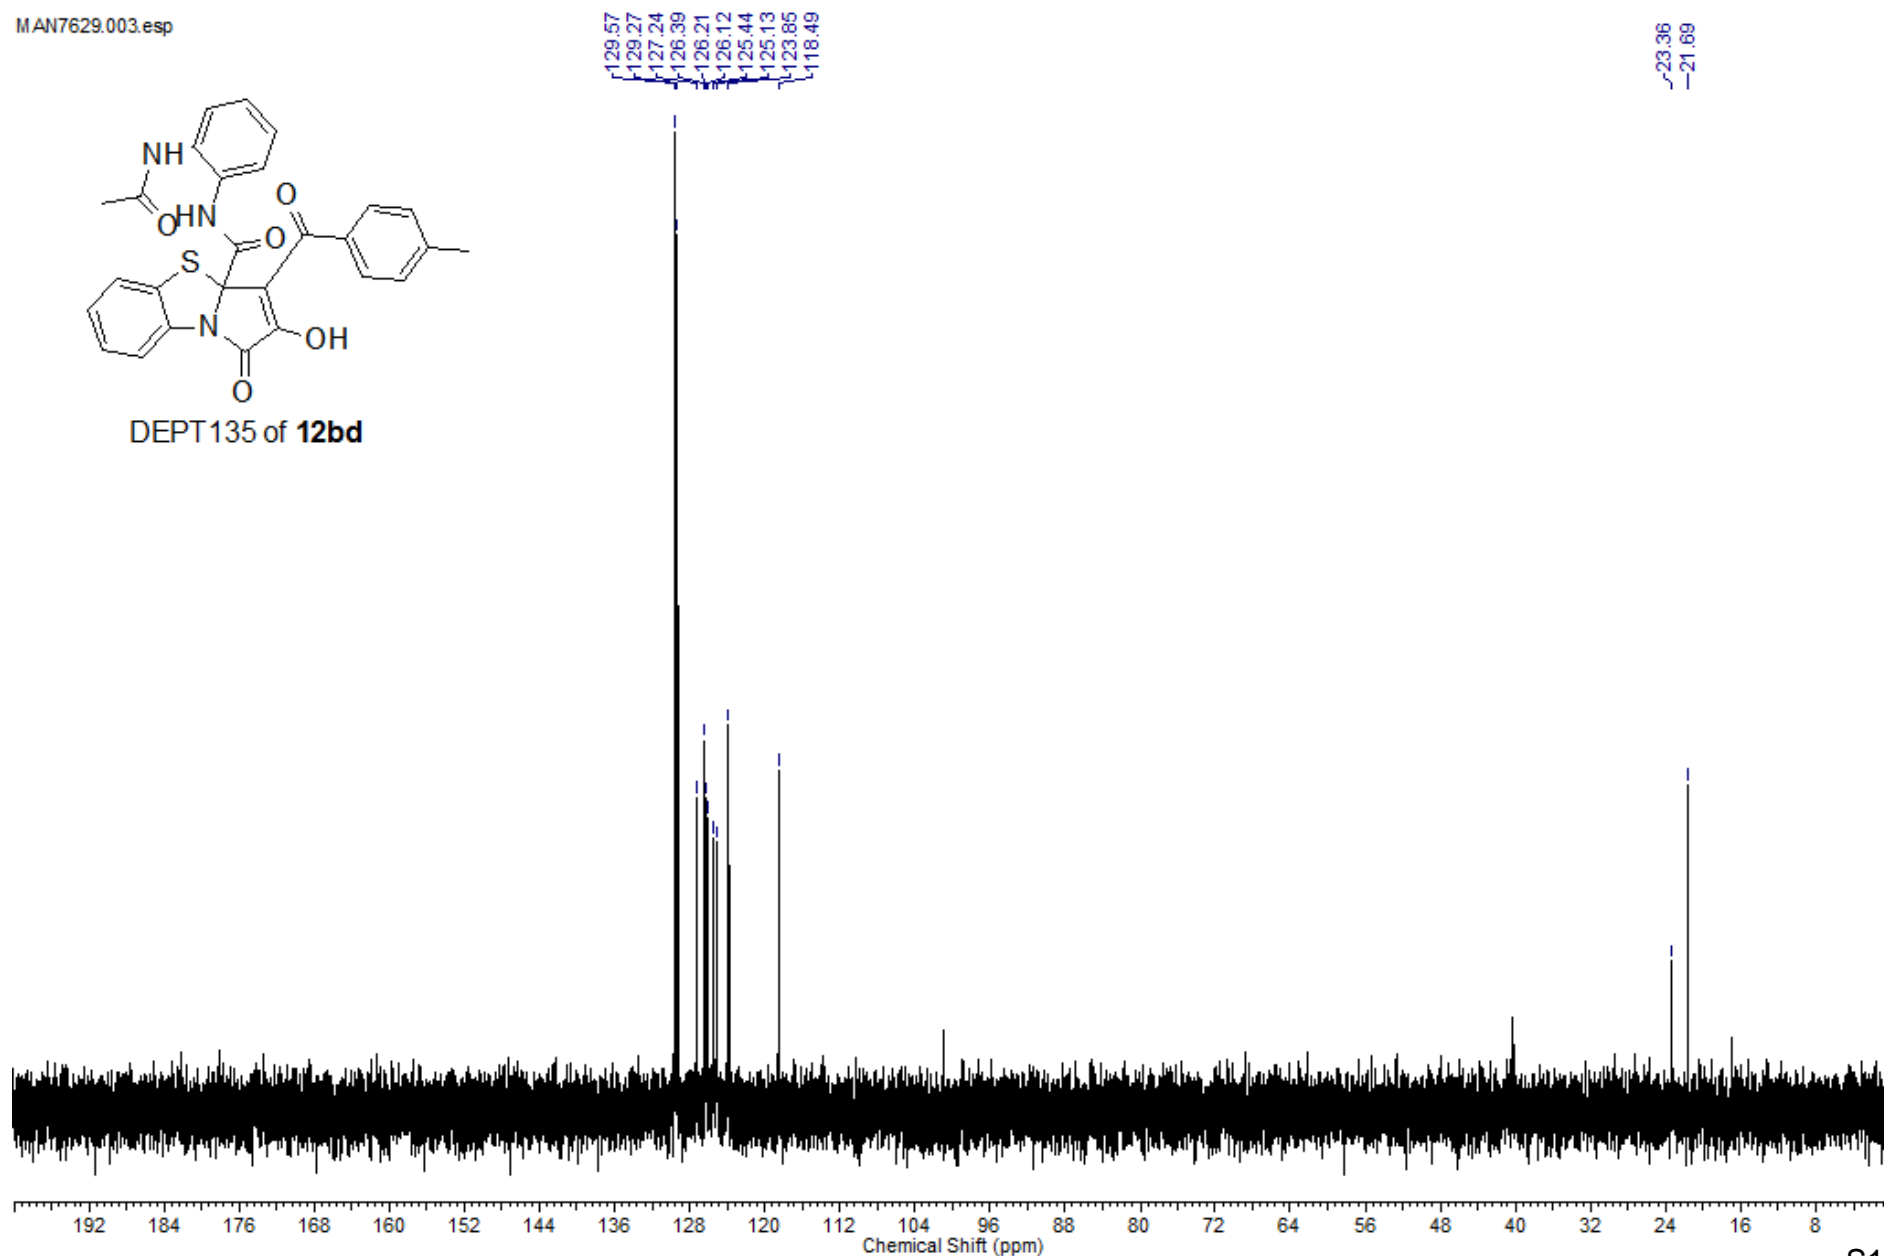

***N*-Mesityl-2,4-dioxo-3-(2-oxo-2*H*-1,4-benzothiazin-3(4*H*)-ylidene)-4-phenylbutanamide (14ab)**

A mixture of compound **1a** (150 mg, 0.45 mmol), mesitylamine **11b** (90  $\mu$ L, 0.90 mmol), and anhydrous toluene (3 mL) is stirred in a closed microreaction V-vial at room temperature for 24 h. Then, the formed precipitate of compound **14ab** is filtered off and washed with toluene. According to NMR spectra of compound **14ab**, in a solution, it exists as a mixture of tautomers (Scheme 1) in a ratio of ~ 1:1, which is typical for similar compounds [4].

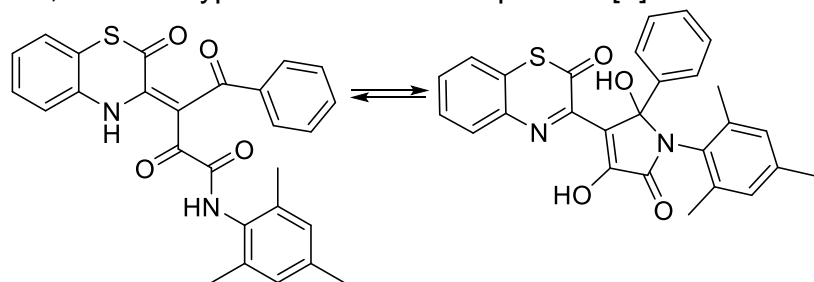

**Scheme 1:** Tautomers of compound **14ab**.

***N*-Mesityl-2,4-dioxo-3-(2-oxo-2*H*-1,4-benzothiazin-3(4*H*)-ylidene)-4-phenylbutanamide (14ab)**

Orange solid; yield (30 mg, 14%); mp 177–178 °C (decomp.).

$^1\text{H}$  NMR (400 MHz, DMSO- $d_6$ ):  $\delta$  = 14.45 (s, 1H), 9.95 (s, 1H), 7.82 (m, 3H), 7.78 (m, 2H), 7.62 (m, 2H), 7.51 (m, 5H), 7.39 (m, 2H), 7.34 (m, 1H), 6.98 (m, 1H), 6.85 (m, 2H), 6.74 (m, 2H), 6.59 (m, 1H), 6.48 (m, 1H), 2.22 (s, 3H), 2.15 (s, 3H), 2.04 (s, 12H) ppm.

$^{13}\text{C}$  NMR (100 MHz, DMSO- $d_6$ ):  $\delta$  = 190.8, 187.4, 170.1, 163.7, 138.2, 137.7, 137.4, 137.2, 136.8, 134.9, 132.2, 129.4, 128.9 (2C), 128.5, 128.2, 128.1, 127.8 (2C), 127.1, 124.8, 118.8, 114.9, 113.6, 79.6, 20.2, 17.9, 17.6 ppm.

IR (mineral oil): 3255, 3054, 1785, 1728, 1683, 1645  $\text{cm}^{-1}$ .

EA: Found: C, 69.21; H, 4.81 N, 5.80. Calc. for  $\text{C}_{27}\text{H}_{22}\text{N}_2\text{O}_4\text{S}$ : C, 68.92; H, 4.71; N, 5.95.

MAN6996.001.esp

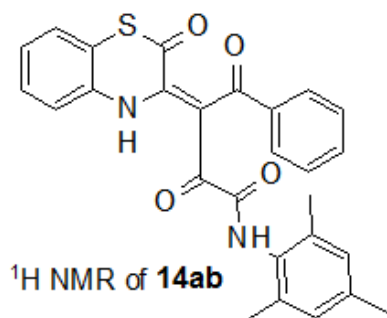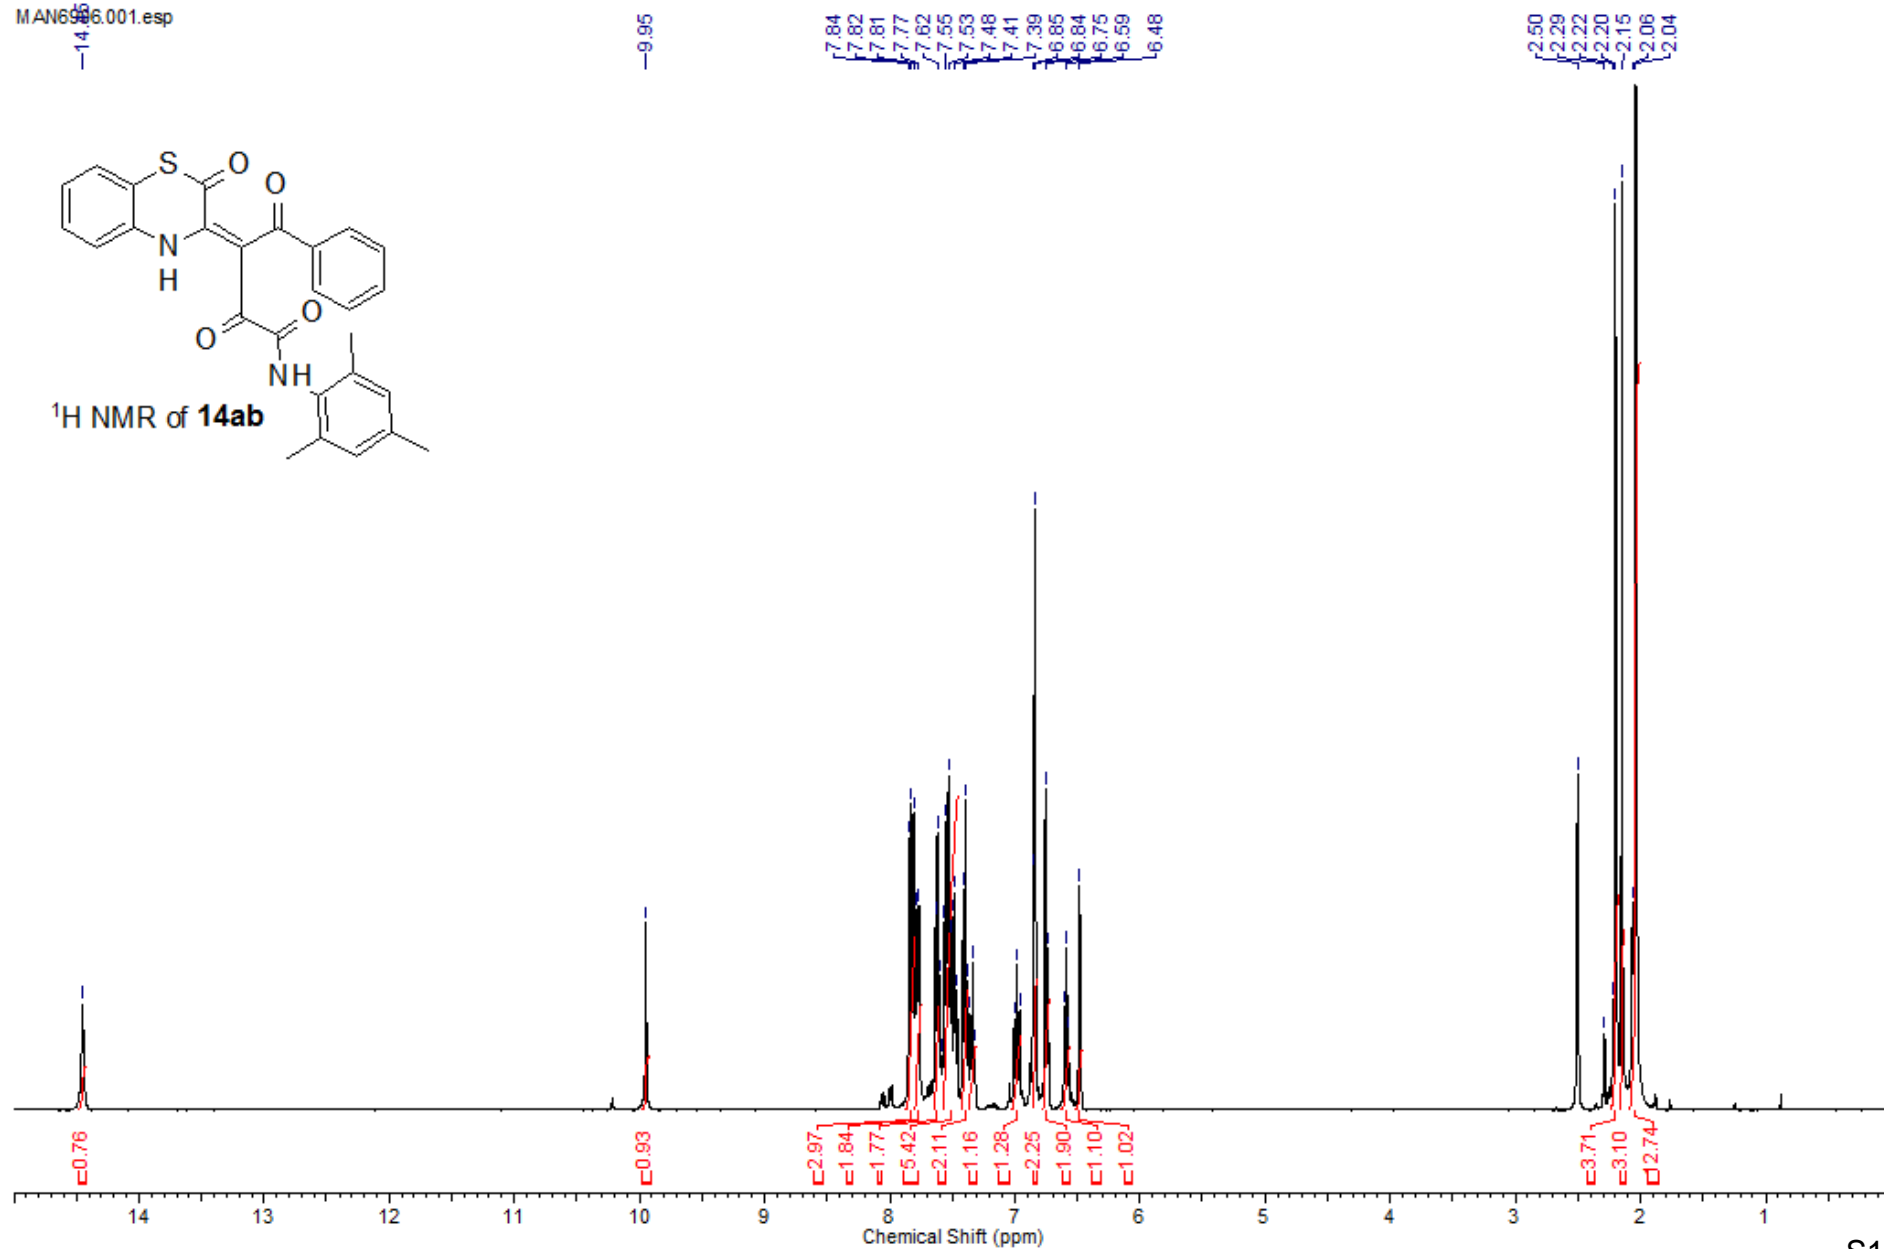

MAN6906.002.050  
—190.80  
—187.38

—170.08  
—163.69

136.71  
137.70  
137.41  
136.78  
134.87  
129.37  
128.92  
128.53  
128.23  
128.09  
127.92  
127.77  
127.12  
124.84  
118.77  
117.91  
114.90  
113.59

—79.62  
—74.69

40.15  
39.94  
39.73  
39.52  
39.31  
39.10  
38.89

20.43  
20.32  
20.15  
18.60  
17.90  
17.57  
17.17

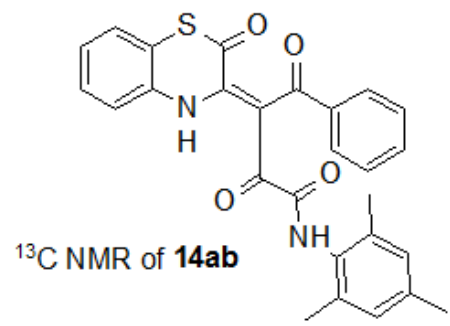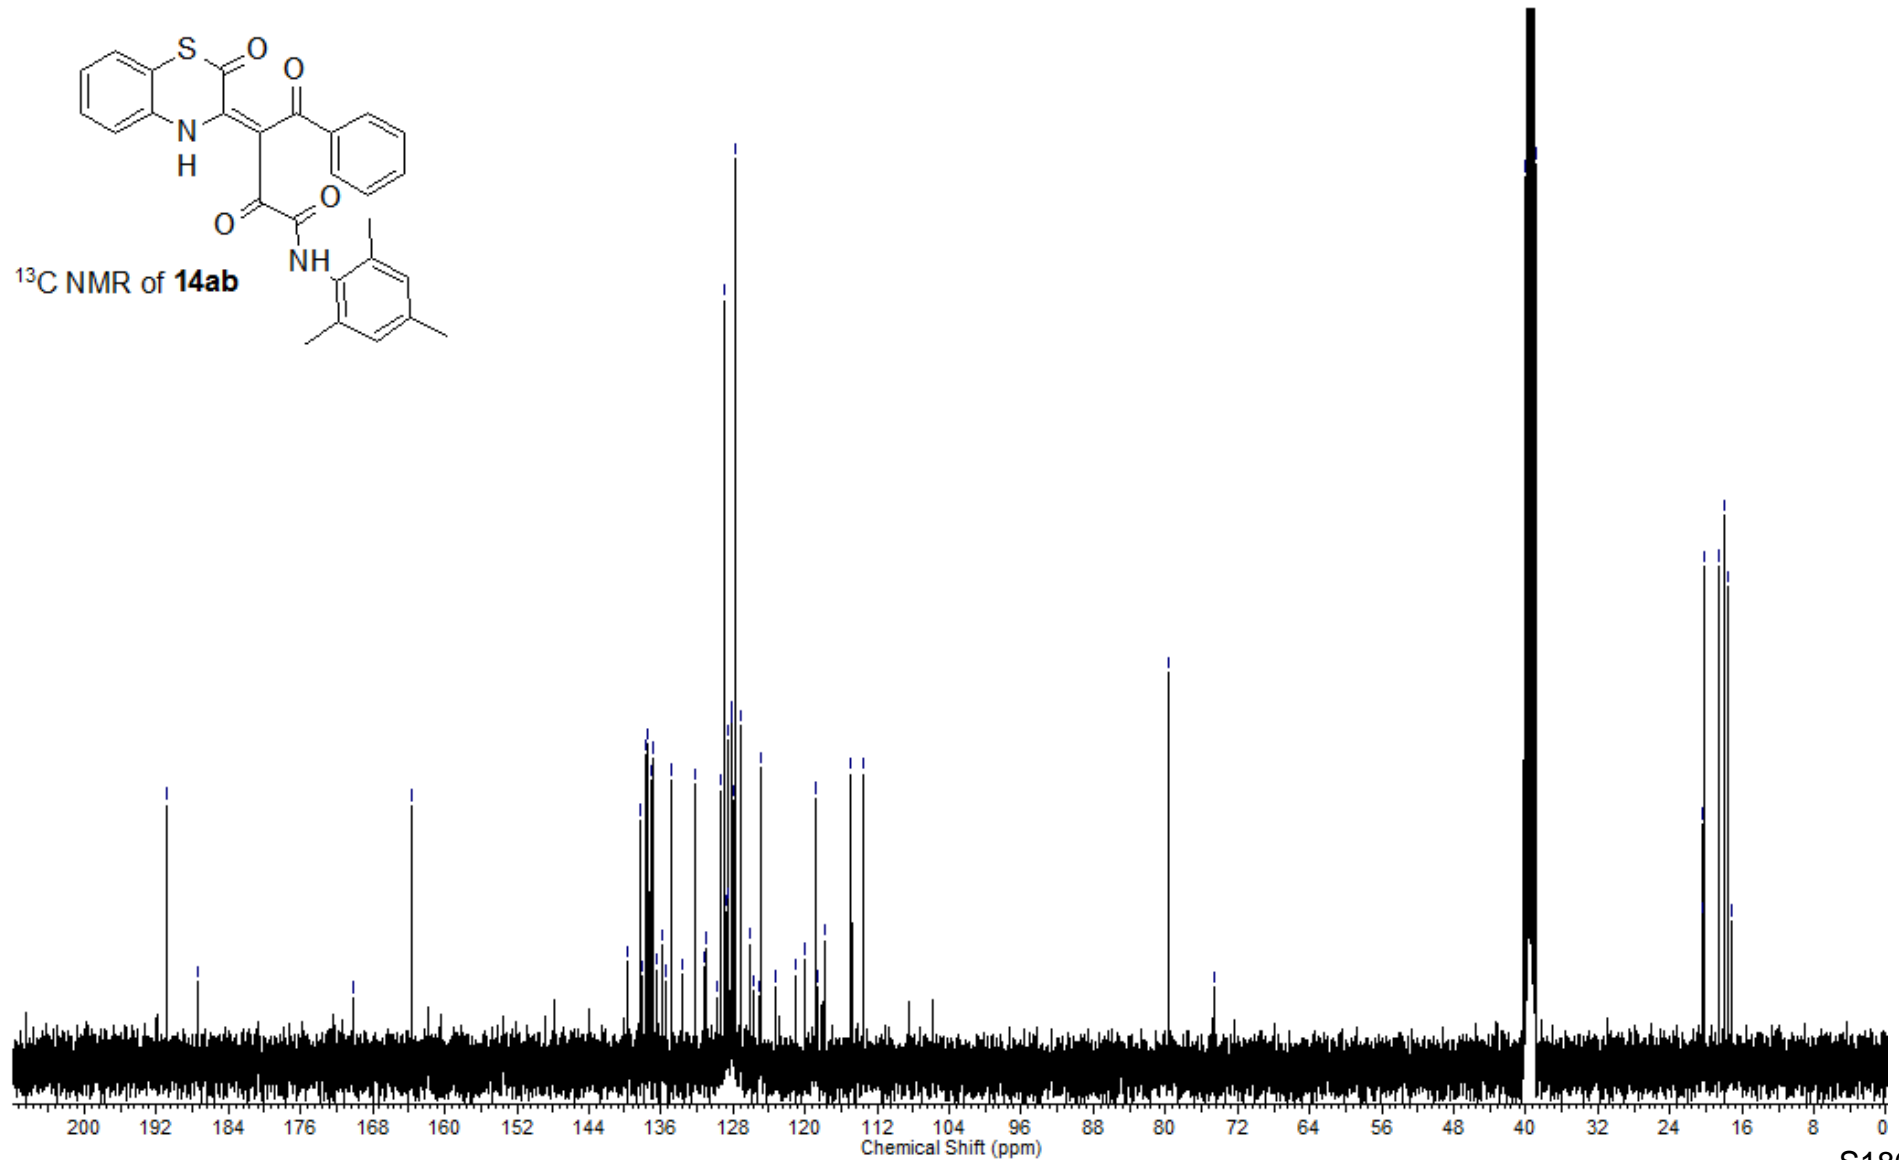

MAN6906.003.esp

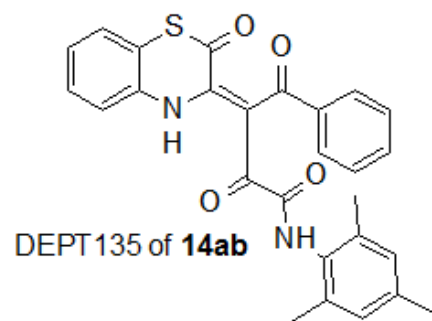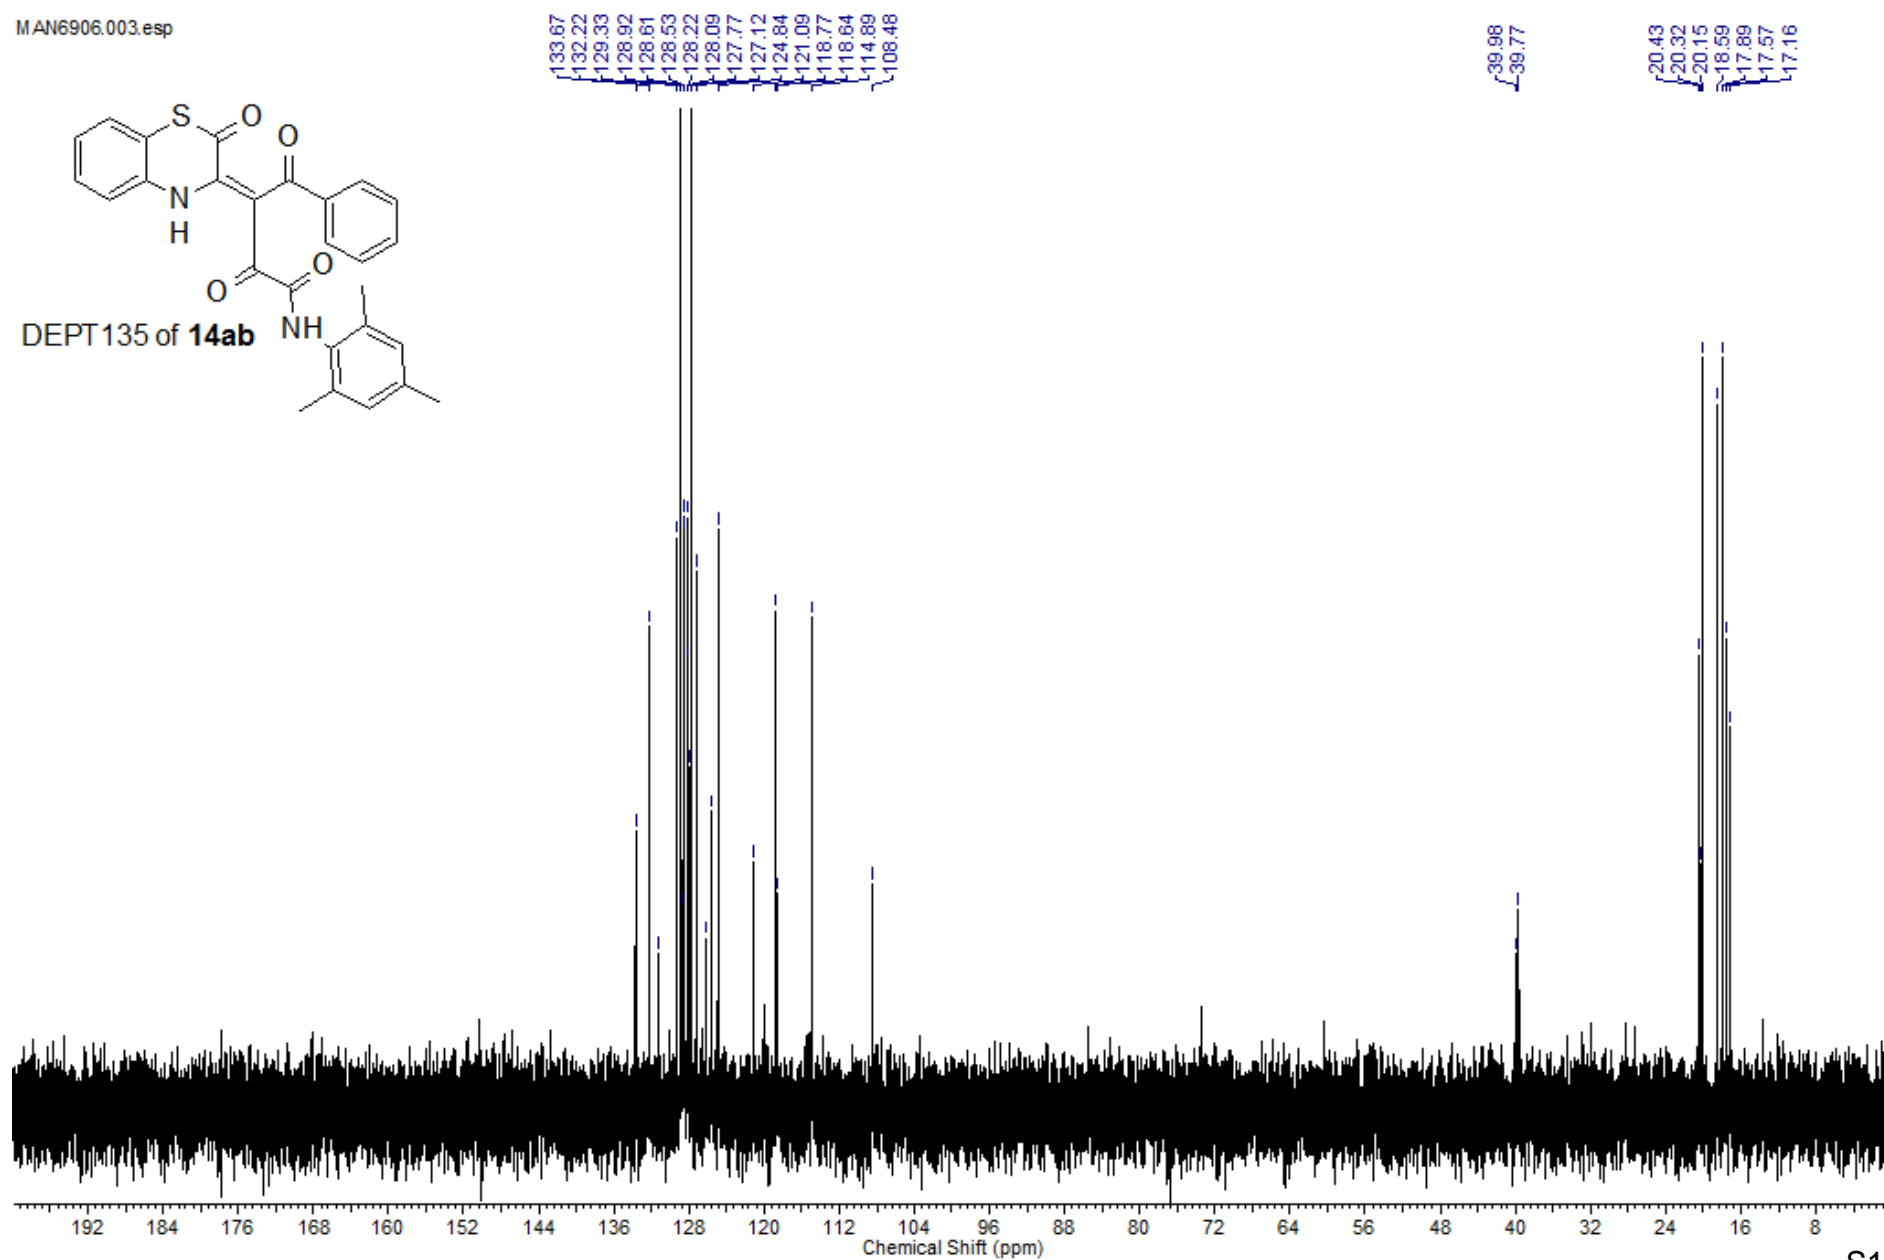

### 3-Benzoylpyrrolo[2,1-*b*][1,3]benzothiazole-1,2-dione (17a)

A mixture of APBTT **1a** (150 mg, 0.45 mmol), benzhydrol (83 mg, 0.45 mmol), and anhydrous toluene (3 mL) was stirred in a closed microreaction V-vial at 113 °C for 2 h. Then, the resulting solution is cooled to room temperature. In 24 h, the formed precipitate of compound **17a** is filtered off and washed with anhydrous toluene.

Red solid; yield (97 mg, 70%); mp 176–178 °C (decomp., toluene).

<sup>1</sup>H NMR (400 MHz, DMSO-*d*<sub>6</sub>): δ = 8.07 (m, 1H), 7.98 (m, 1H), 7.94 (m, 1H), 7.61 (m, 2H), 7.57–7.40 (m, 4H).

<sup>13</sup>C NMR (100 MHz, CDCl<sub>3</sub>): δ = 185.1, 184.4, 171.7, 154.1, 136.7, 133.3, 132.8, 129.4 (2C), 129.3, 128.5, 128.2 (2C), 127.0, 123.6, 114.8, 107.2.

IR (mineral oil): 1784, 1742, 1658 cm<sup>-1</sup>.

EA: Found: C, 66.53; H, 2.99; N, 4.61. Calc. for C<sub>17</sub>H<sub>9</sub>NO<sub>3</sub>S: C, 66.44; H, 2.95; N, 4.56.

MAN7433.008.esp

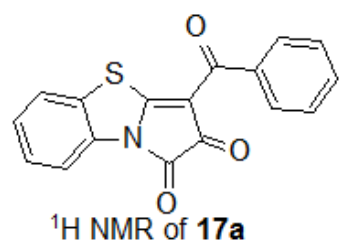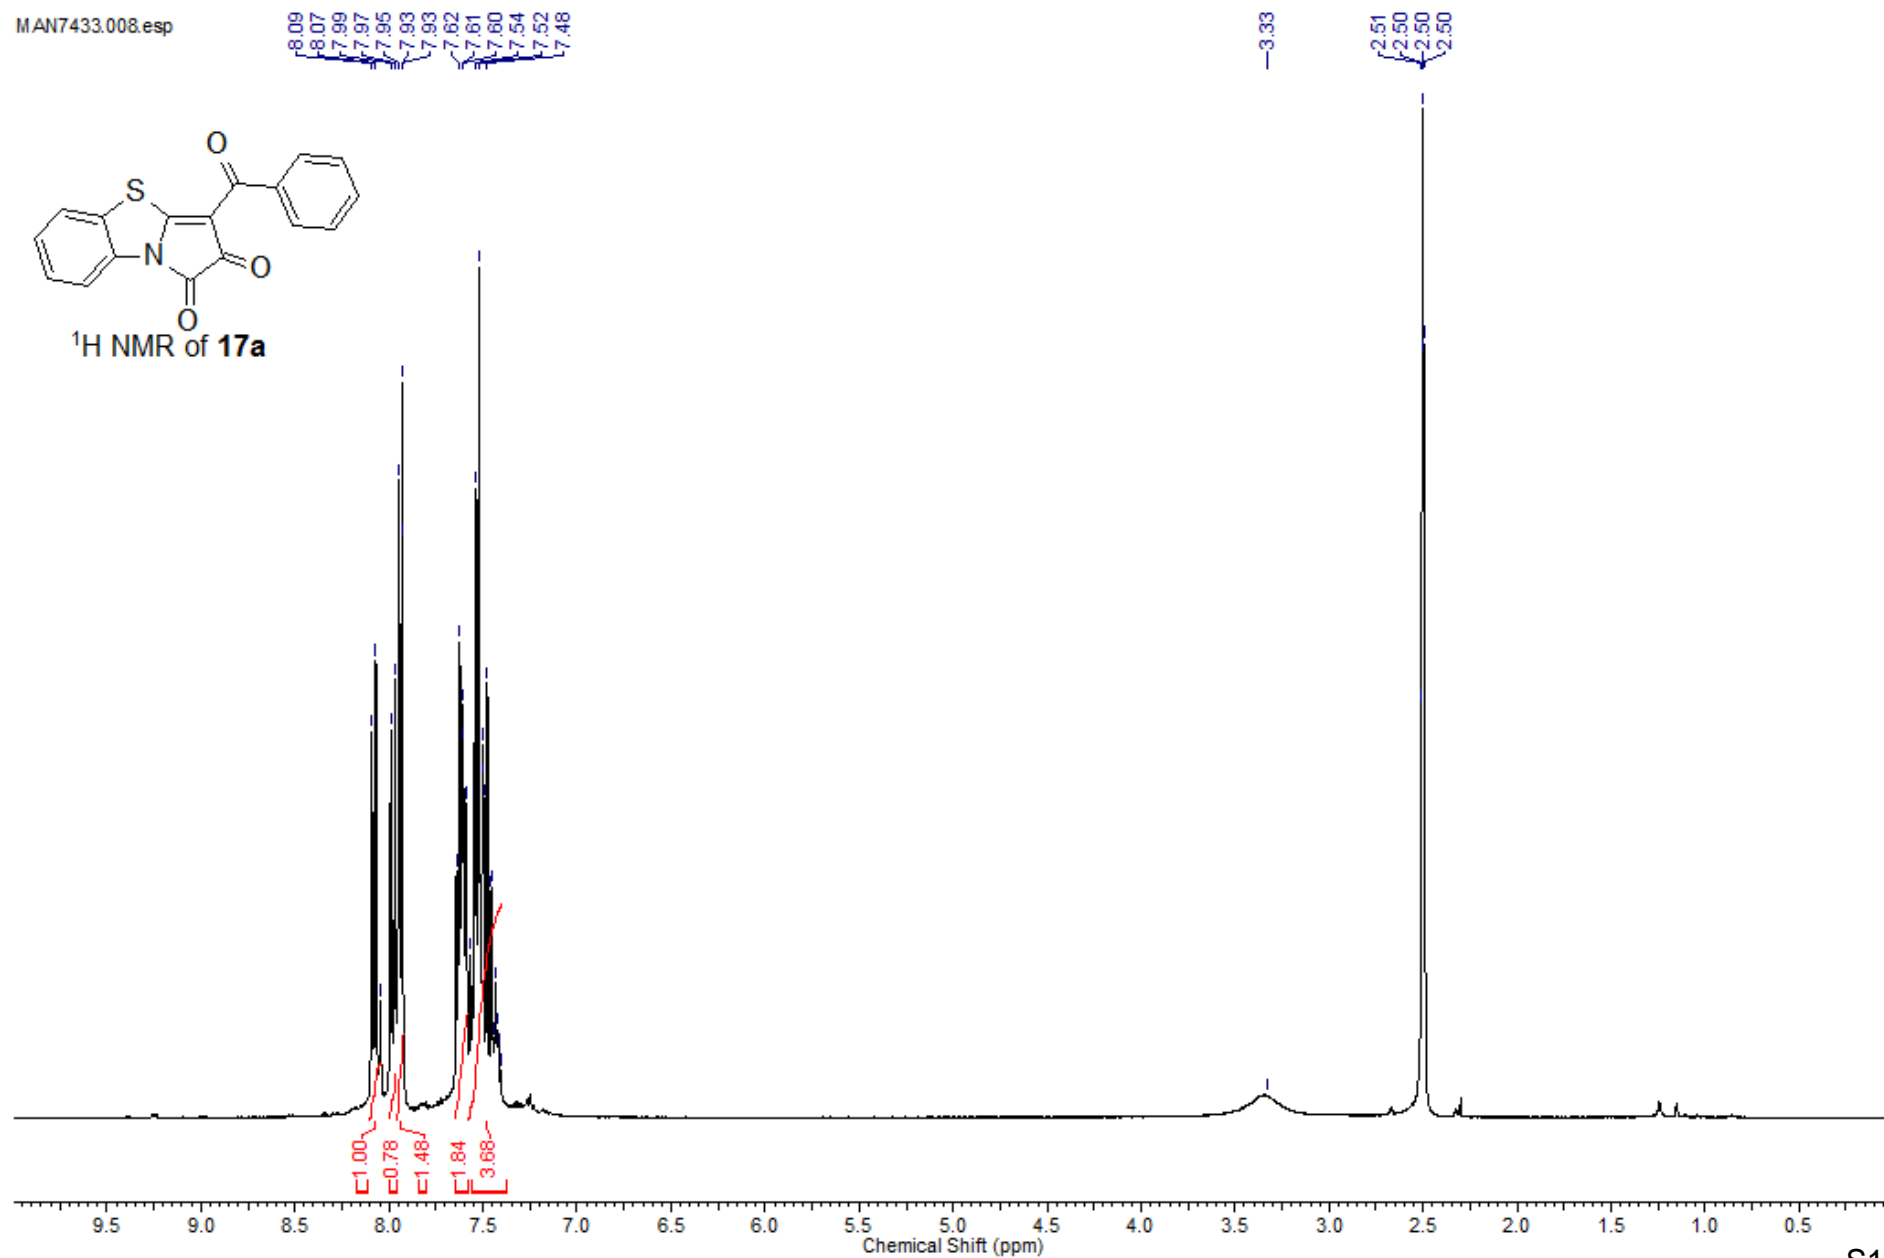

MAN7433.006.esp

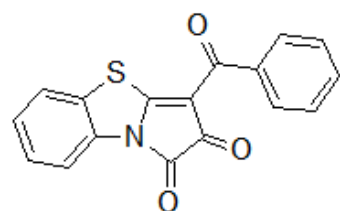

<sup>13</sup>C NMR of 17a

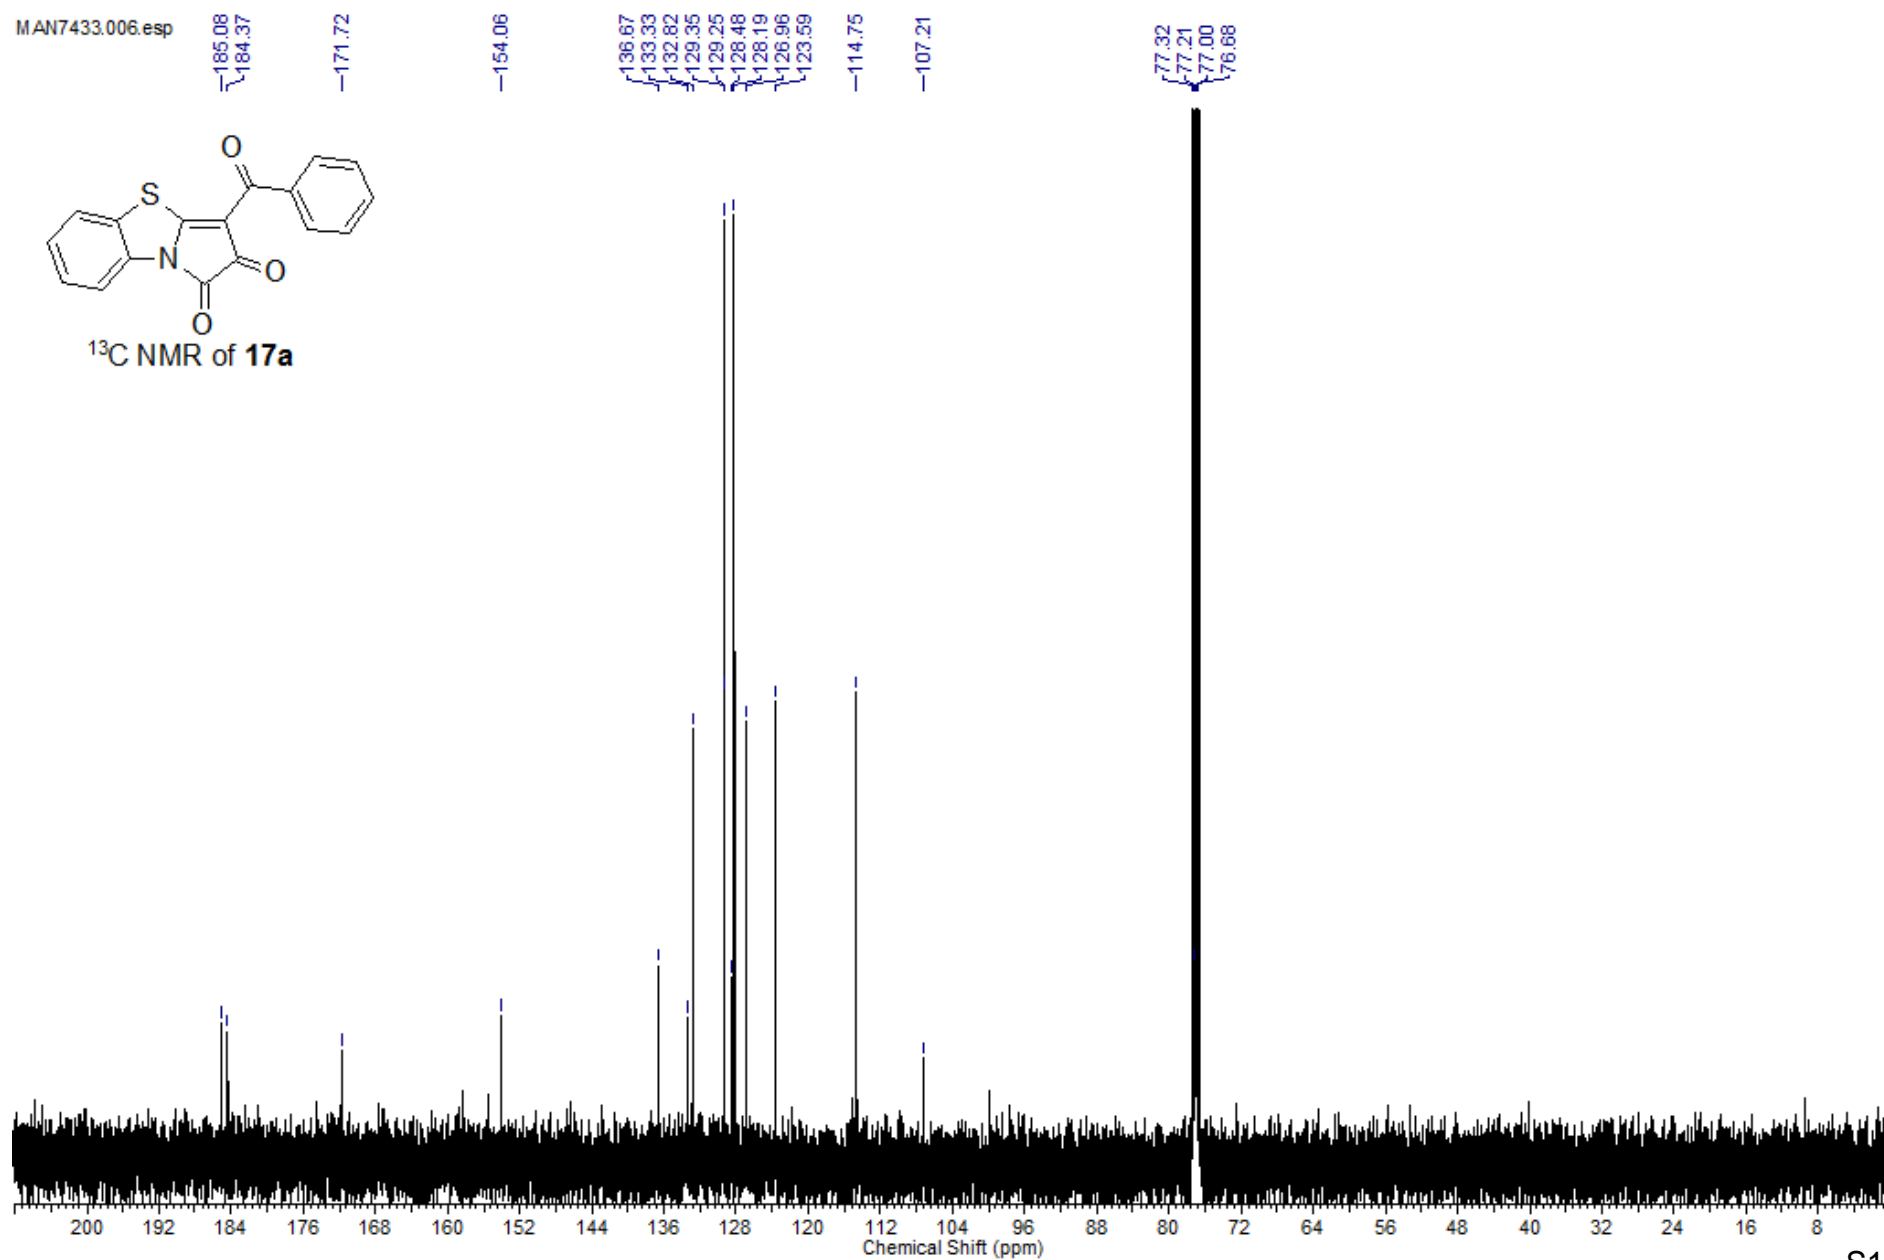



MAN7433.007.esp

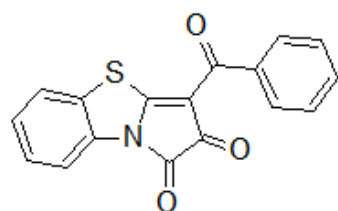

DEPT135 of **17a**

132.83  
129.36  
129.26  
128.20  
126.97  
123.60  
-114.76

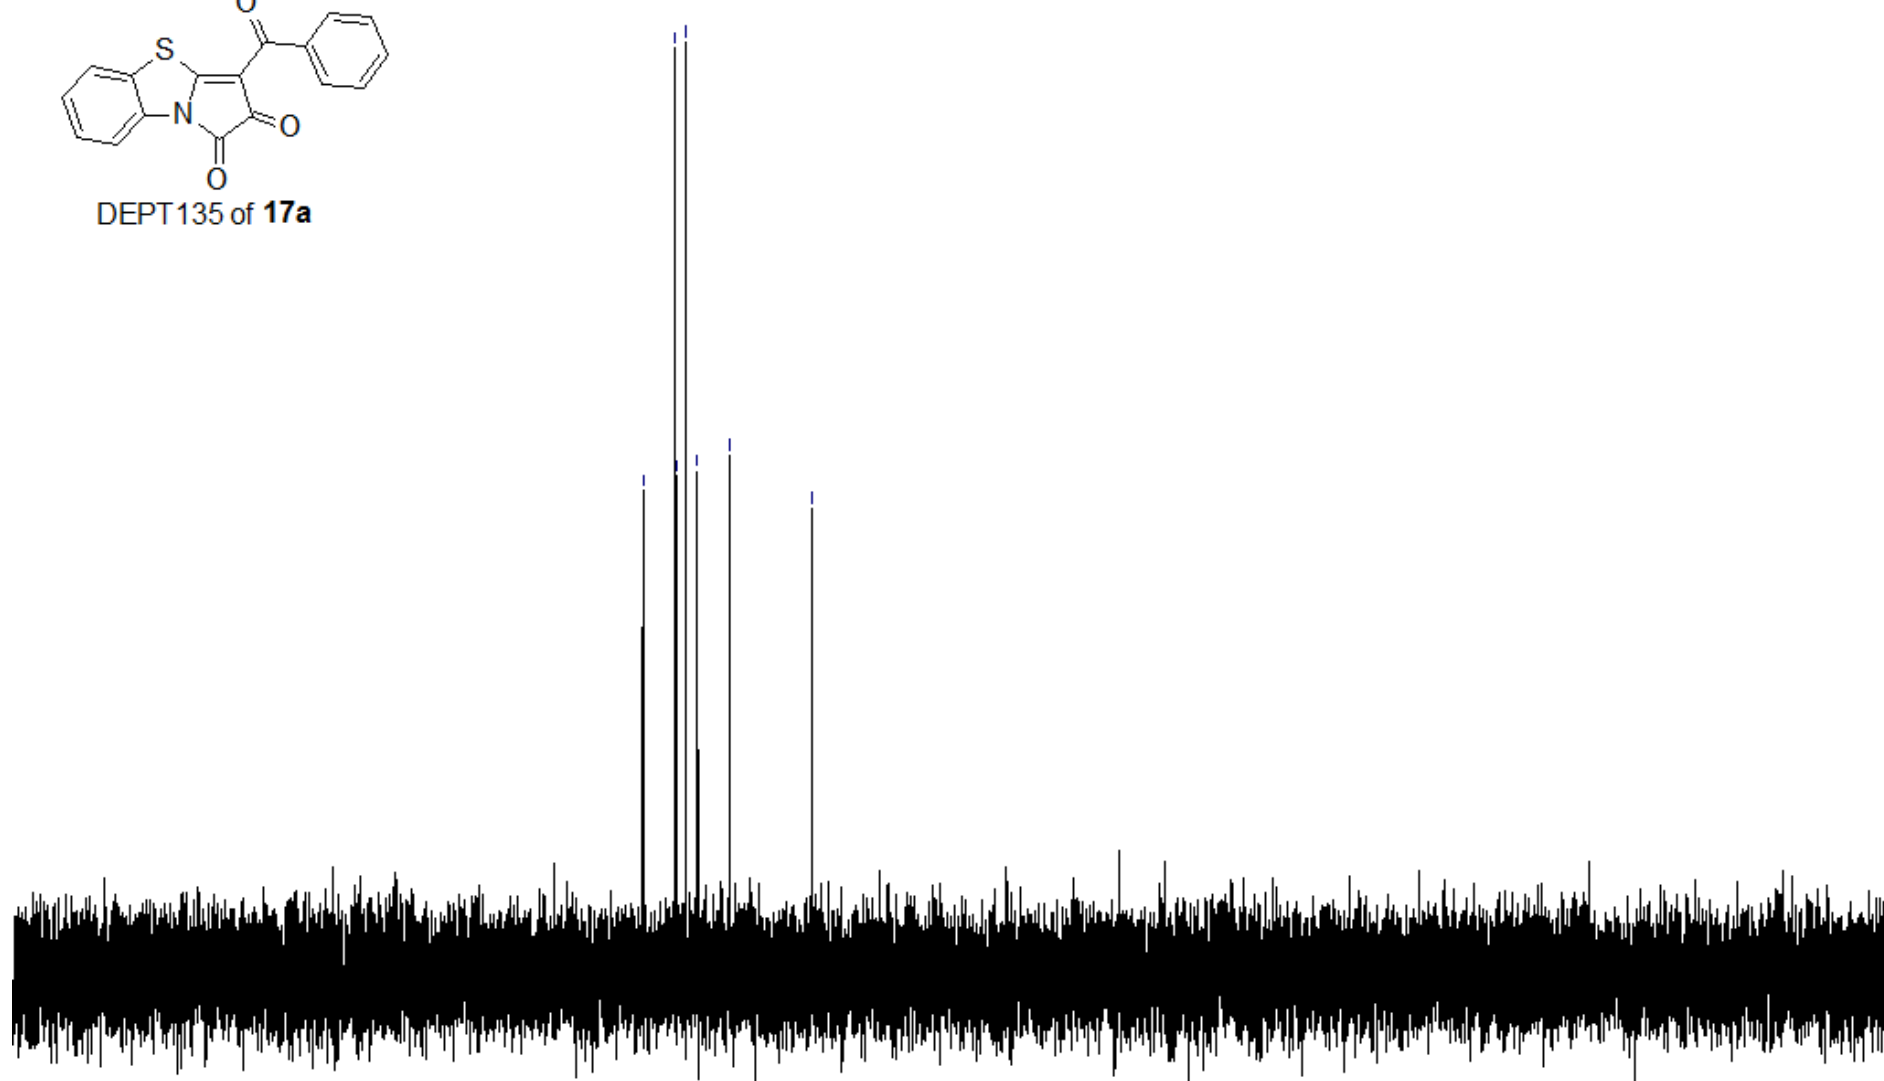

### Preparation of samples for HPLC-UV analyses for optimization. General procedure to compounds 4, 8, 13.

Reaction mixtures are obtained according scales and conditions from Tables 1-3 of the main manuscript. Then, solvents are removed from the reaction mixtures at room temperature. After that, anhydrous toluene (0.5 mL) and DCC (1.1 equiv) are added to the reaction mixtures. The obtained mixtures are stirred for 1 h at 113 °C. The resulting reaction mixtures are cooled to room temperature. Then, biphenyl (10 mg) (internal standard) and chloroform (0.5 mL) are added (dicyclohexylurea precipitate is observed). Next, aliquots (0.1 mL) of the obtained mixtures are diluted with acetonitrile (0.9 mL). The obtained solutions are used for HPLC-UV.

The treatment with DCC is necessary to derivatize compounds **3aa**, **7a**, **12aa** to corresponding compounds **4**, **8**, **13** by a protocol developed by us earlier [5] in order to obtain good HPLC-UV signals.

### General procedure to compounds 4, 8, 13.

A mixture of compounds **3aa**, **7a** or **12aa** (0.54 mmol) and DCC (0.59 mmol) in toluene (3 mL) was stirred in an oven-dried closed microreaction V-vial at 113 °C for 1 h. Then, the resulting solution is cooled to room temperature. The formed precipitate of dicyclohexylurea is filtered off, washed with toluene. Then, the solvent is removed under vacuum from the obtained solution. The resulting reaction mixture is recrystallized from ethanol to afford compound **4**. Compounds **8**, **13** are purified with a column chromatography (toluene/ethyl acetate, 25:1) and should not be dried in an oven since they can decompose.

### Methyl 3-benzoyl-2-[cyclohexyl(cyclohexylcarbamoyl)amino]-1-oxopyrrolo[2,1-*b*][1,3]benzothiazole-3a(1*H*)-carboxylate (**4**)

Yellow solid; yield (307 mg, 99%); mp 184–186 °C (decomp., EtOH).

<sup>1</sup>H NMR (400 MHz, DMSO-*d*<sub>6</sub>): δ = 7.94 (m, 2H), 7.72 (m, 1H), 7.53 (m, 2H), 7.45 (m, 2H), 7.28–7.17 (m, 2H), 6.50 (m, 1H), 3.55 (m, 4H), 3.35 (m, 1H), 3.26 (s, 1H), 1.72 (m, 3H), 1.60–1.43 (m, 4H), 1.35 (m, 2H), 1.26–1.18 (m, 4H), 1.16–1.03 (m, 5H), 0.89–0.79 (m, 1H) ppm.

<sup>13</sup>C NMR (100 MHz, DMSO-*d*<sub>6</sub>): δ = 190.3, 168.4, 166.3, 154.0, 141.3, 137.8, 135.7, 135.2, 134.5, 134.3, 129.2 (2C), 128.6 (2C), 126.2, 126.0, 122.9, 118.1, 77.8, 58.3, 53.6, 49.6, 32.5, 32.4, 31.8, 30.1, 25.3, 25.2 (2C), 25.0, 25.0, 24.8 ppm.

IR (mineral oil): 3418, 1749, 1721, 1656, 1639 cm<sup>-1</sup>.

EA: Found: C, 67.10; H, 6.20; N, 7.33. Calc. for C<sub>32</sub>H<sub>35</sub>N<sub>3</sub>O<sub>5</sub>S: C, 66.99; H, 6.15; N, 7.32.

### 3-Benzoyl-*N*-benzyl-2-[cyclohexyl(cyclohexylcarbamoyl)amino]-1-oxopyrrolo[2,1-*b*][1,3]benzothiazole-3a(1*H*)-carboxamide (**8**)

Yellow solid; yield (347 mg, 99%); mp 113–115 °C (decomp.).

<sup>1</sup>H NMR (400 MHz, CDCl<sub>3</sub>): δ = 7.90 (m, 2H), 7.83 (m, 1H), 7.74 (m, 1H), 7.69 (m, 1H), 7.54 (m, 2H), 7.35 (m, 3H), 7.27 (m, 4H), 7.15 (m, 1H), 5.27 (m, 1H), 4.59–4.39 (m, 2H), 3.92 (m, 1H), 3.51 (m, 1H), 2.47 (m, 1H), 1.98 (m, 1H), 1.87 (m, 2H), 1.77 (m, 5H), 1.64 (m, 3H), 1.54 (m, 1H), 1.39 (m, 2H), 1.25 (m, 4H), 1.11–0.94 (m, 1H) ppm.

<sup>13</sup>C NMR (100 MHz, CDCl<sub>3</sub>): δ = 190.6, 167.9, 166.1, 154.2, 142.6, 140.0, 136.8, 135.9, 134.7, 134.0, 132.8, 129.0, 128.6, 128.6 (2C), 128.2 (2C), 127.6, 127.2, 126.8, 126.6, 125.3, 123.2, 118.6, 81.3, 59.3, 50.0, 44.7, 33.2, 33.0, 31.3, 31.2, 26.2, 26.1, 25.6, 25.3, 24.9, 24.8 ppm.

IR (thin layer obtained from CHCl<sub>3</sub>): 3380, 1732, 1677, 1639 cm<sup>-1</sup>.

EA: Found: C, 71.35; H, 6.37; N, 8.33. Calc. for 3C<sub>38</sub>H<sub>40</sub>N<sub>4</sub>O<sub>4</sub>S · C<sub>7</sub>H<sub>8</sub>: C, 71.29; H, 6.33; N, 8.25.

**3-Benzoyl- 2-[cyclohexyl(cyclohexylcarbamoyl)amino]-1-oxo-*N*-phenylpyrrolo[2,1-*b*][1,3]benzothiazole-3a(1*H*)-carboxamide (13)**

Yellow solid; yield (339 mg, 88%, purity 90%); mp 116–118 °C (decomp.).

<sup>1</sup>H NMR (400 MHz, CDCl<sub>3</sub>): δ = 9.17 (s, 1H), 7.84 (m, 2H), 7.79 (m, 1H), 7.60 (m, 1H), 7.47 (m, 3H), 7.28 (m, 3H), 7.22 (m, 2H), 7.15–7.09 (m, 2H), 5.10 (m, 1H), 3.82 (m, 1H), 3.46 (m, 1H), 2.59 (m, 2H), 2.04 (m, 2H), 1.81 (m, 2H), 1.73 (m, 4H), 1.58 (m, 3H), 1.48 (m, 1H), 1.34 (m, 2H), 1.24–1.08 (m, 3H), 0.92 (m, 1H) ppm.

<sup>13</sup>C NMR (100 MHz, CDCl<sub>3</sub>): δ = 190.6, 168.2, 164.0, 154.2, 142.5, 140.2, 136.7, 135.9, 134.7, 134.1, 132.4, 129.1, 129.0 (2C), 128.7, 128.3, 127.0, 126.8, 125.4, 123.3, 121.6, 120.2 (2C), 118.8, 81.8, 59.5, 50.0, 33.2, 33.0, 31.4, 31.2, 26.3, 26.1, 25.6, 25.3, 24.9, 24.8 ppm.

IR (thin layer obtained from CHCl<sub>3</sub>): 3346, 1735, 1682, 1639 cm<sup>-1</sup>.

EA: Found: C, 70.33; H, 6.25; N, 8.97. Calc. for C<sub>37</sub>H<sub>38</sub>N<sub>4</sub>O<sub>4</sub>S: C, 70.01; H, 6.03; N, 8.83.

MAN7599.001.esp

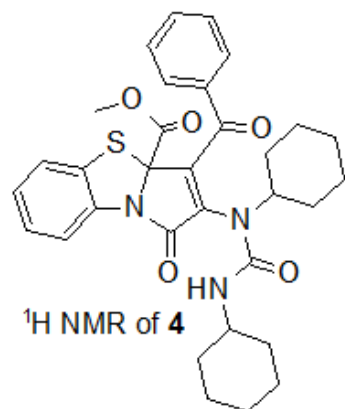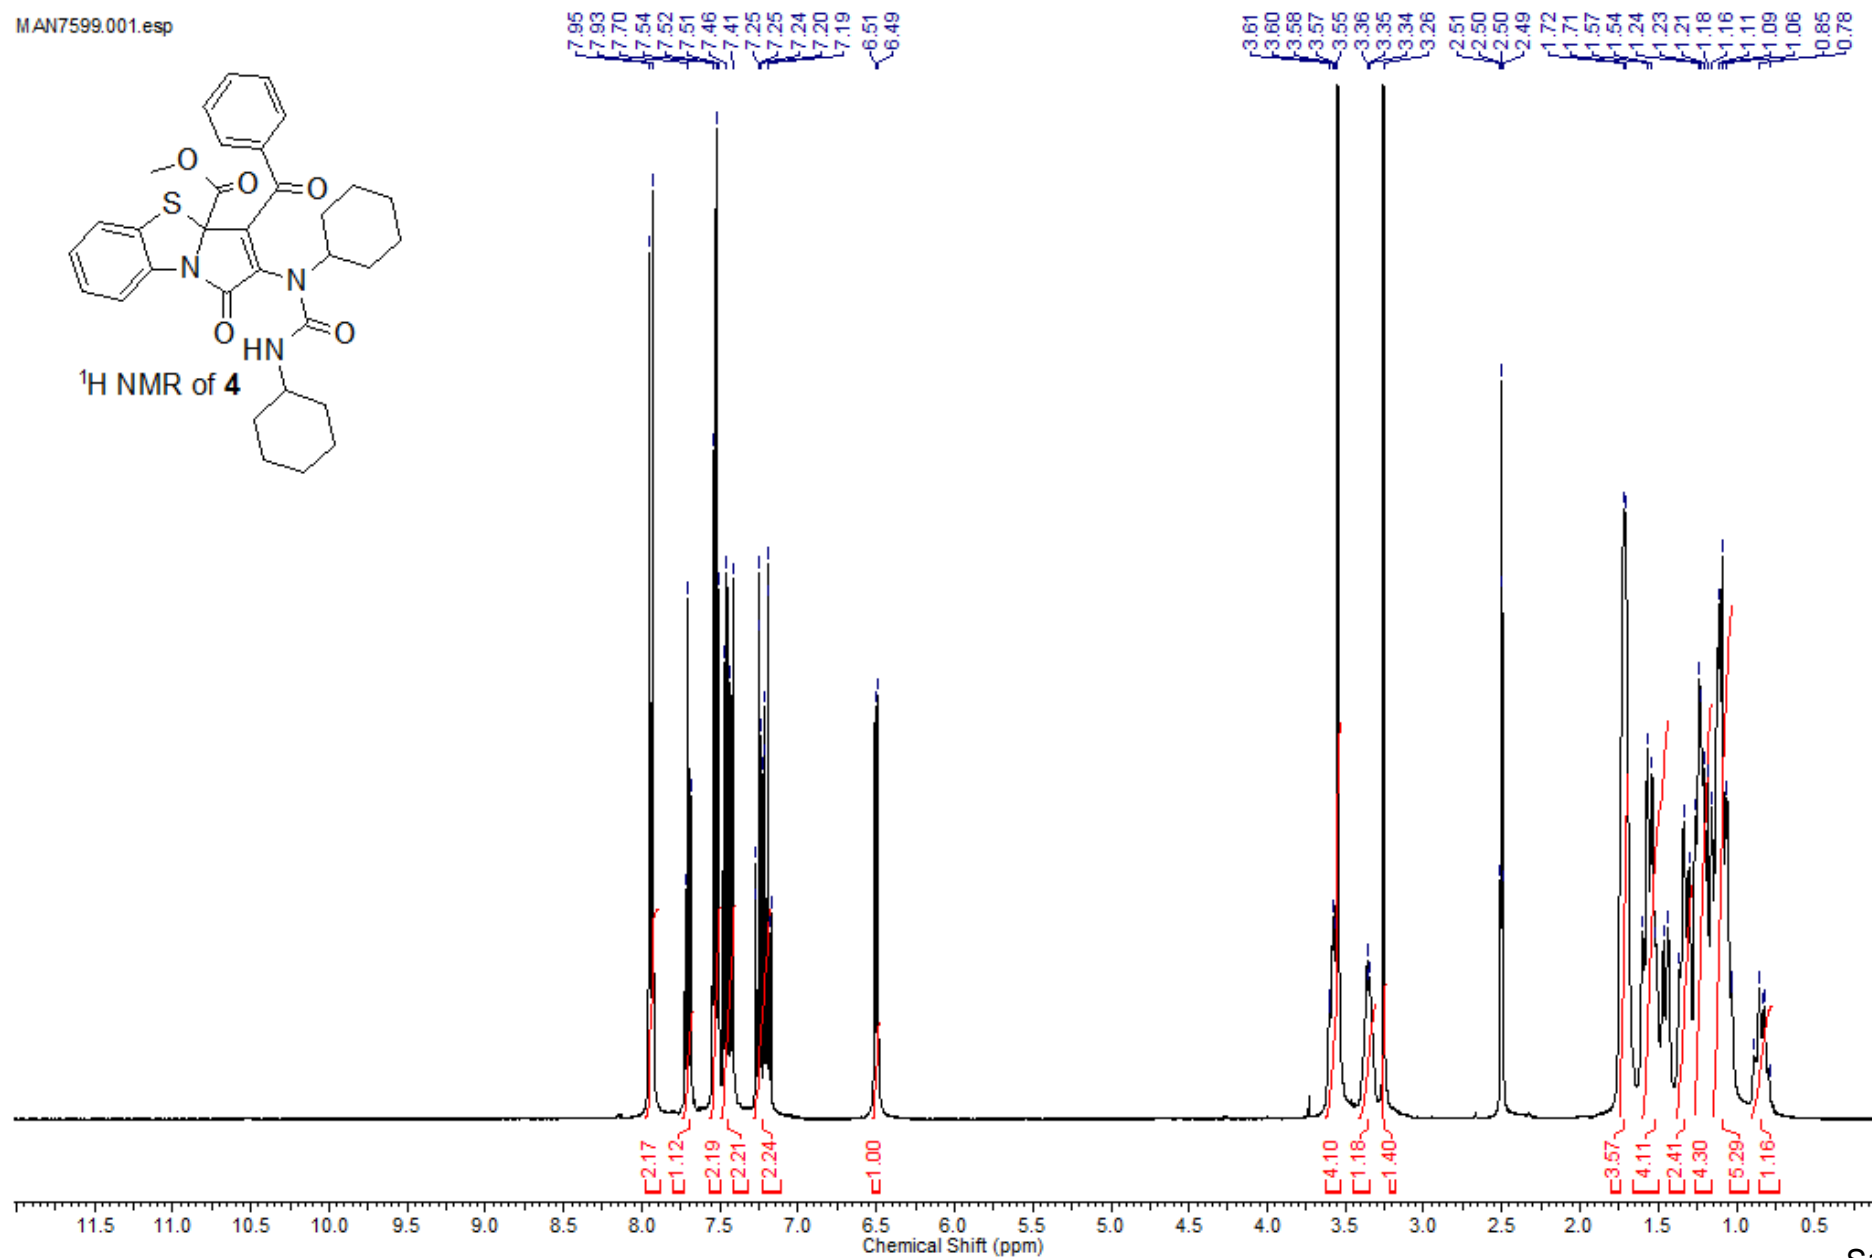

MAN7599.002.esp

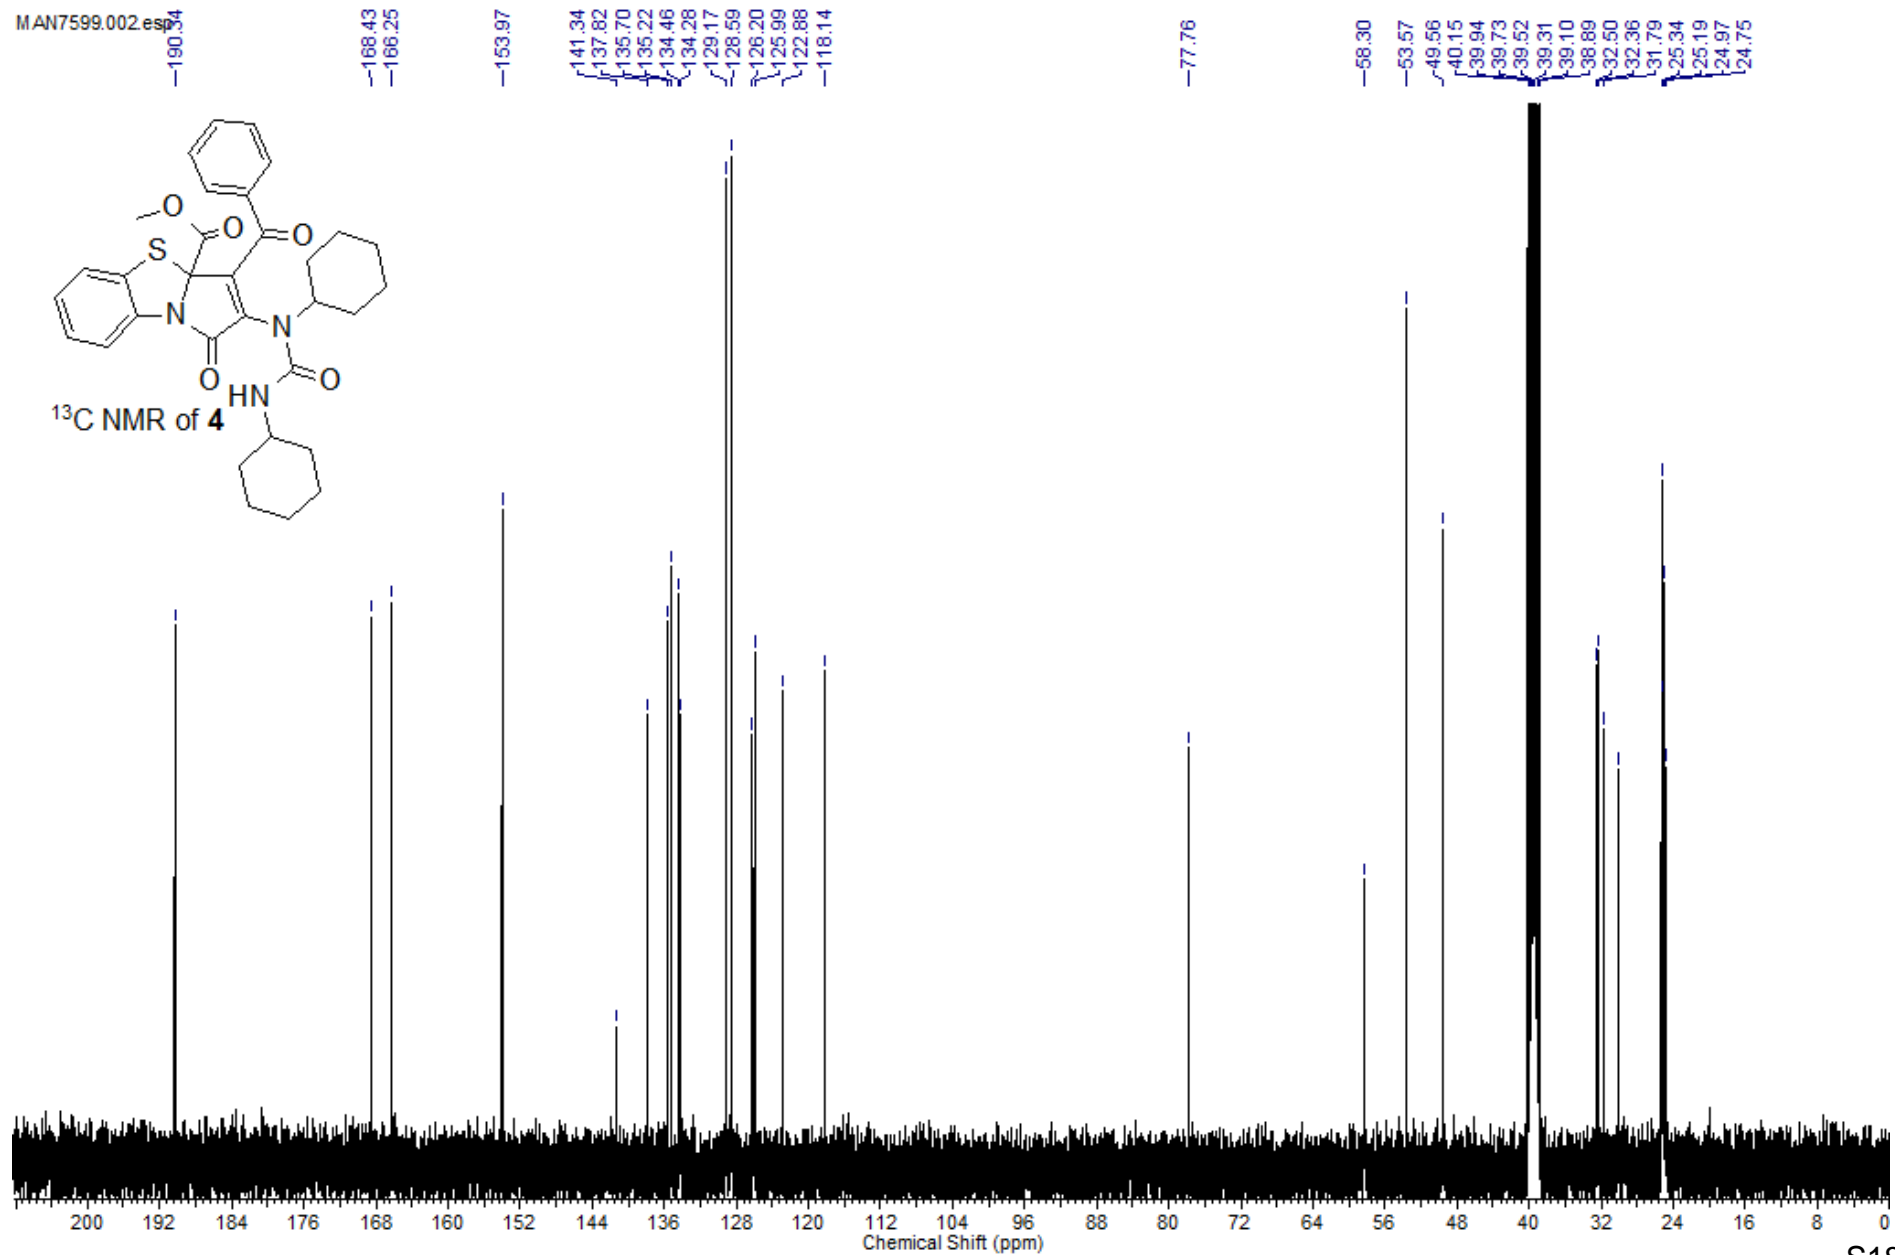

MAN7599.003.esp

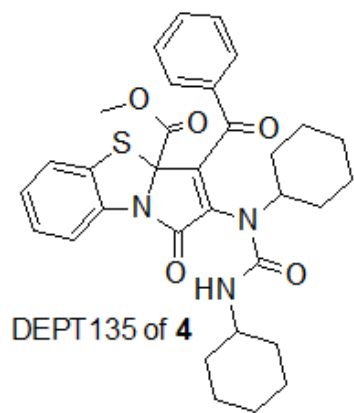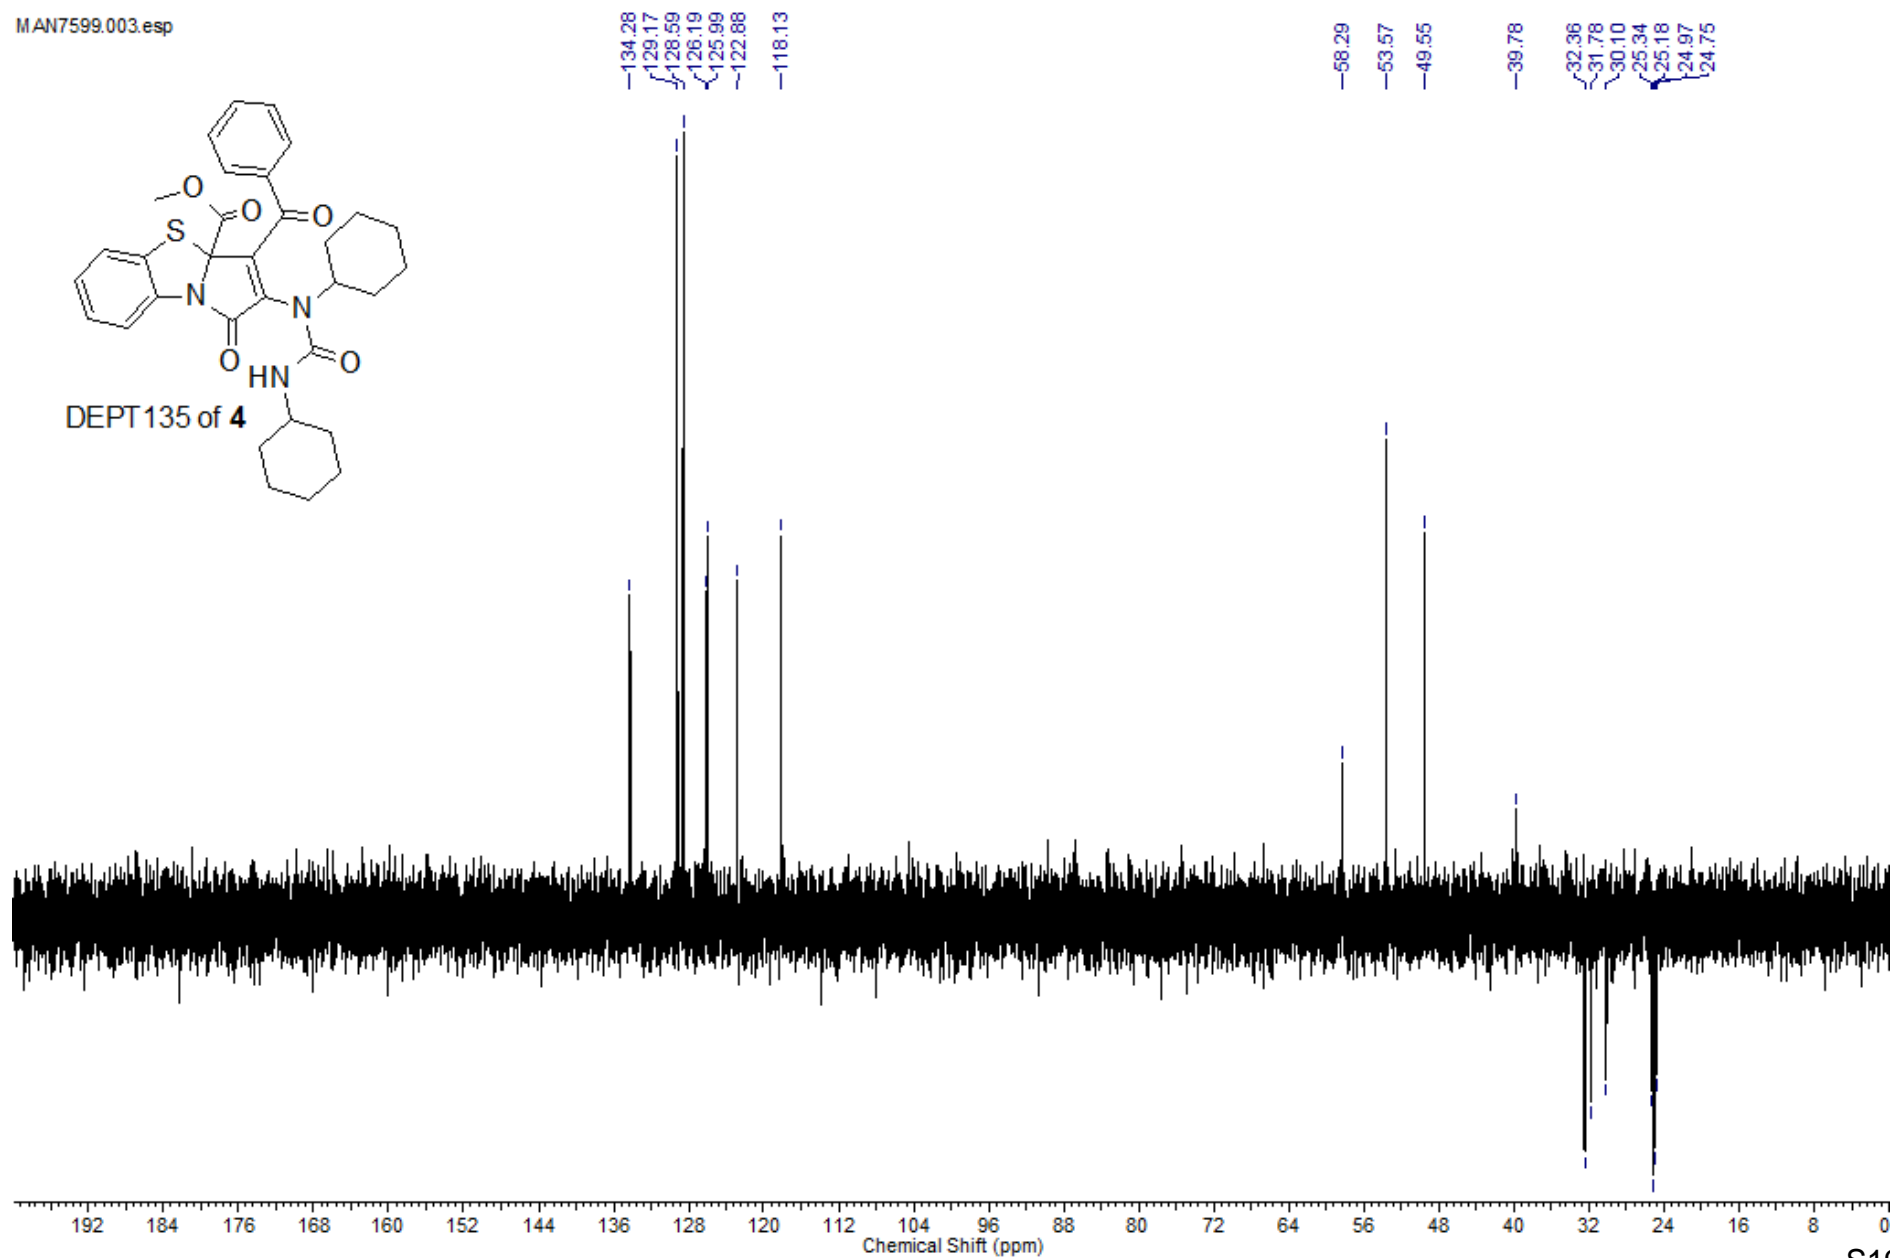

S190

MAN7862.001.esp

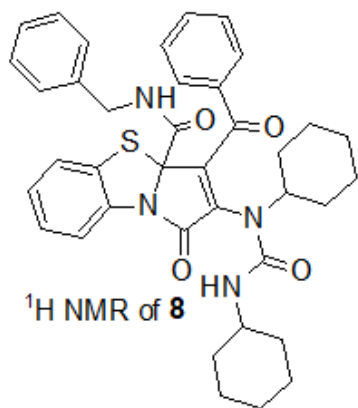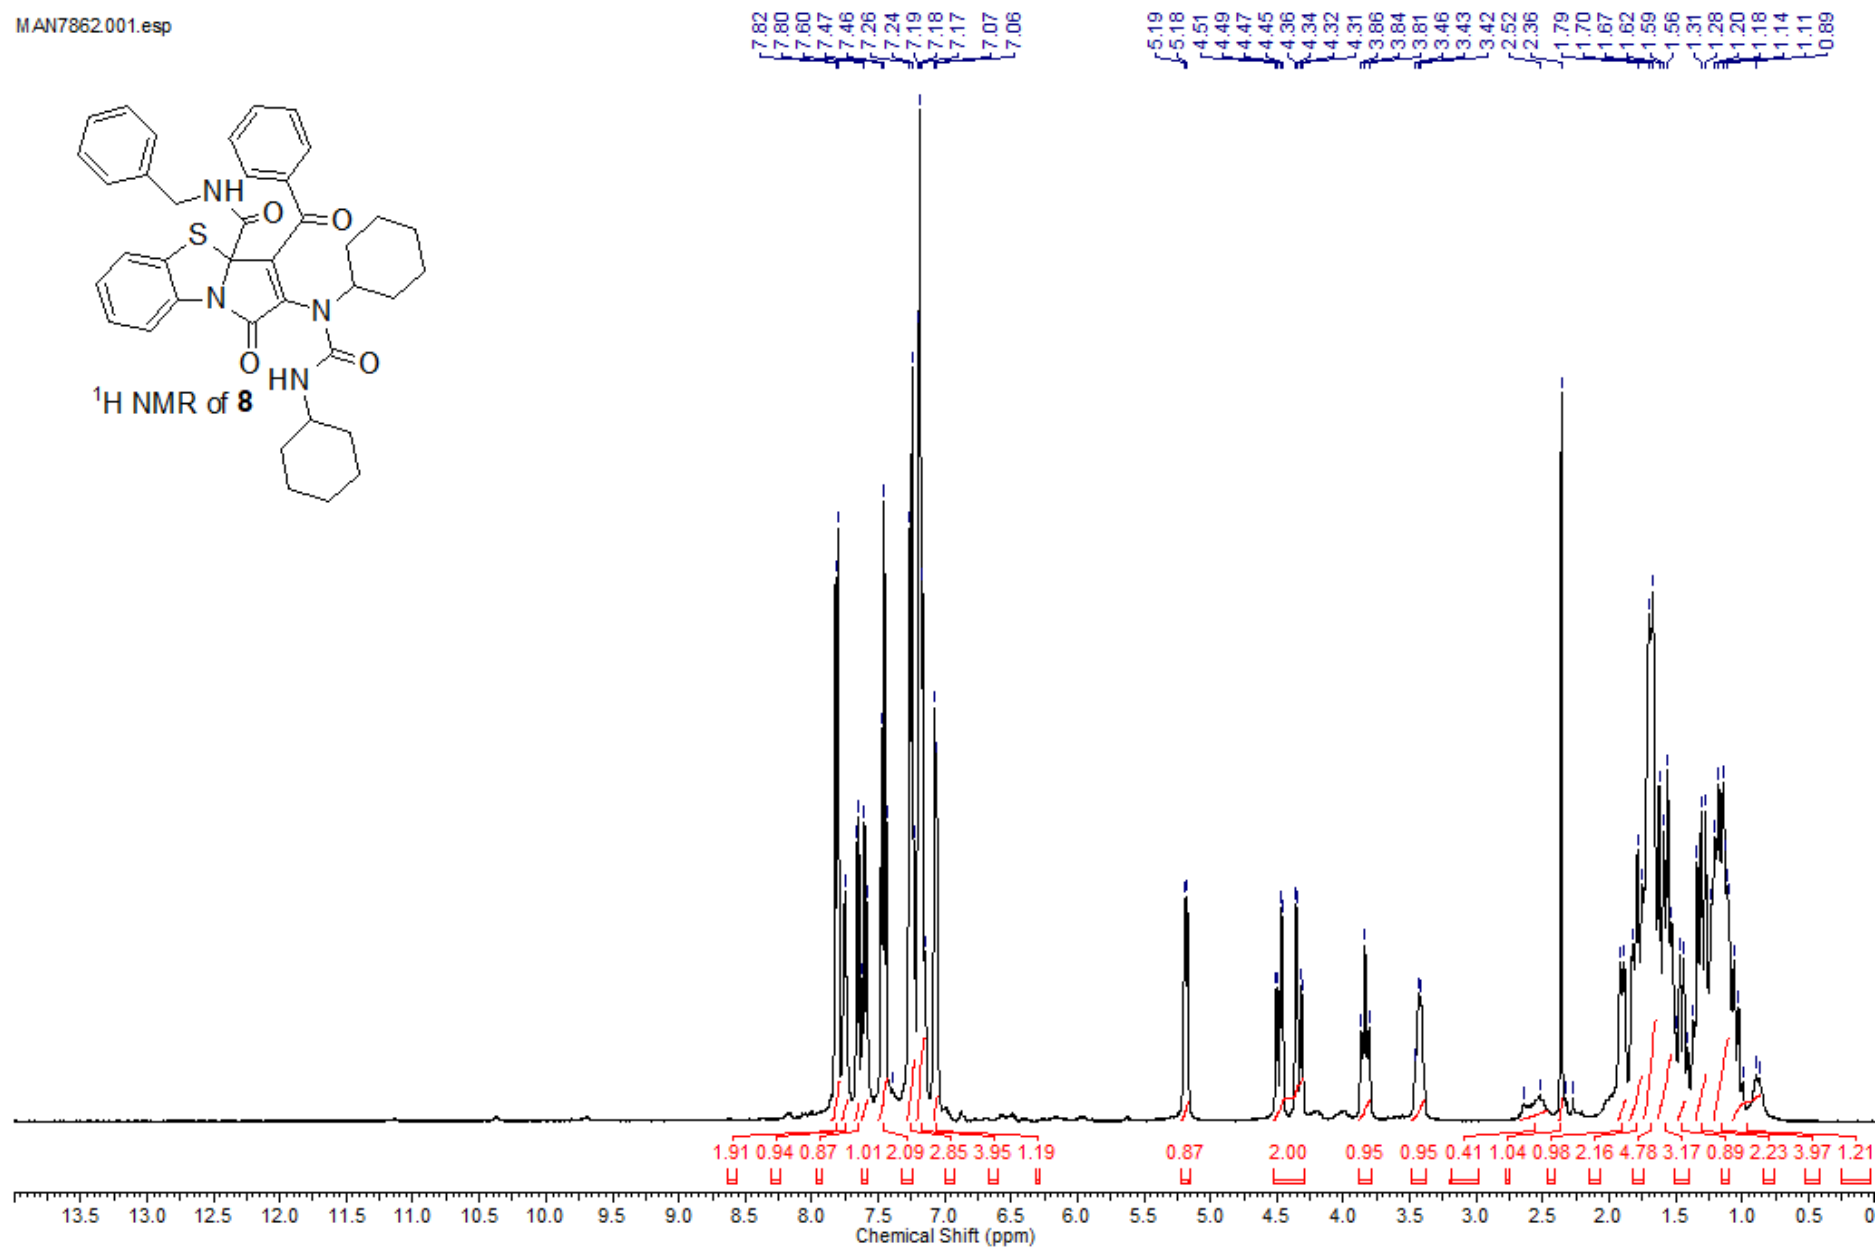

S191

MAN7862.002.esy

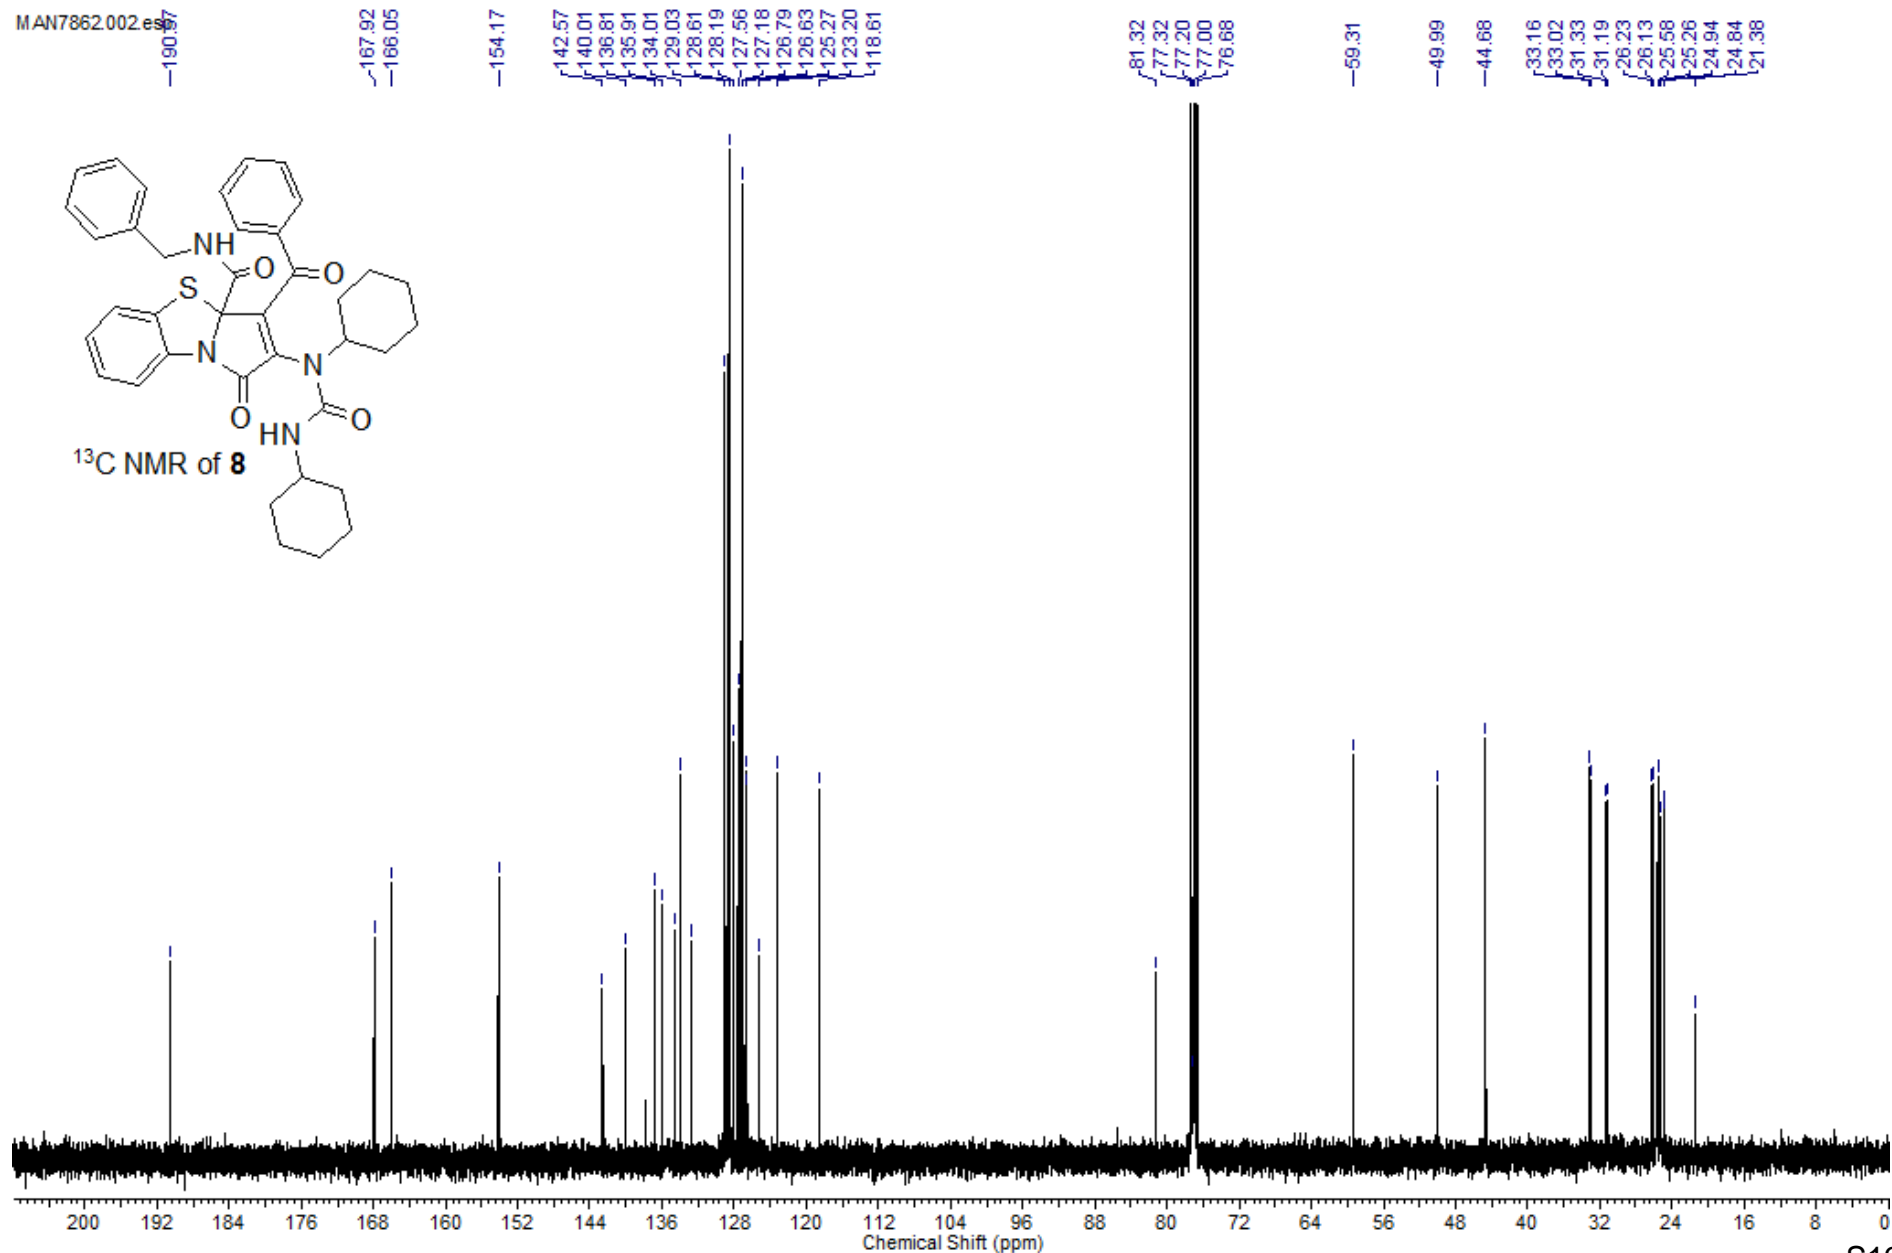





MAN7606.02 esp

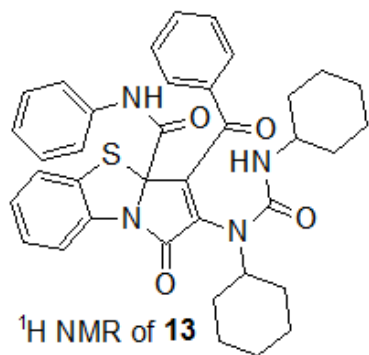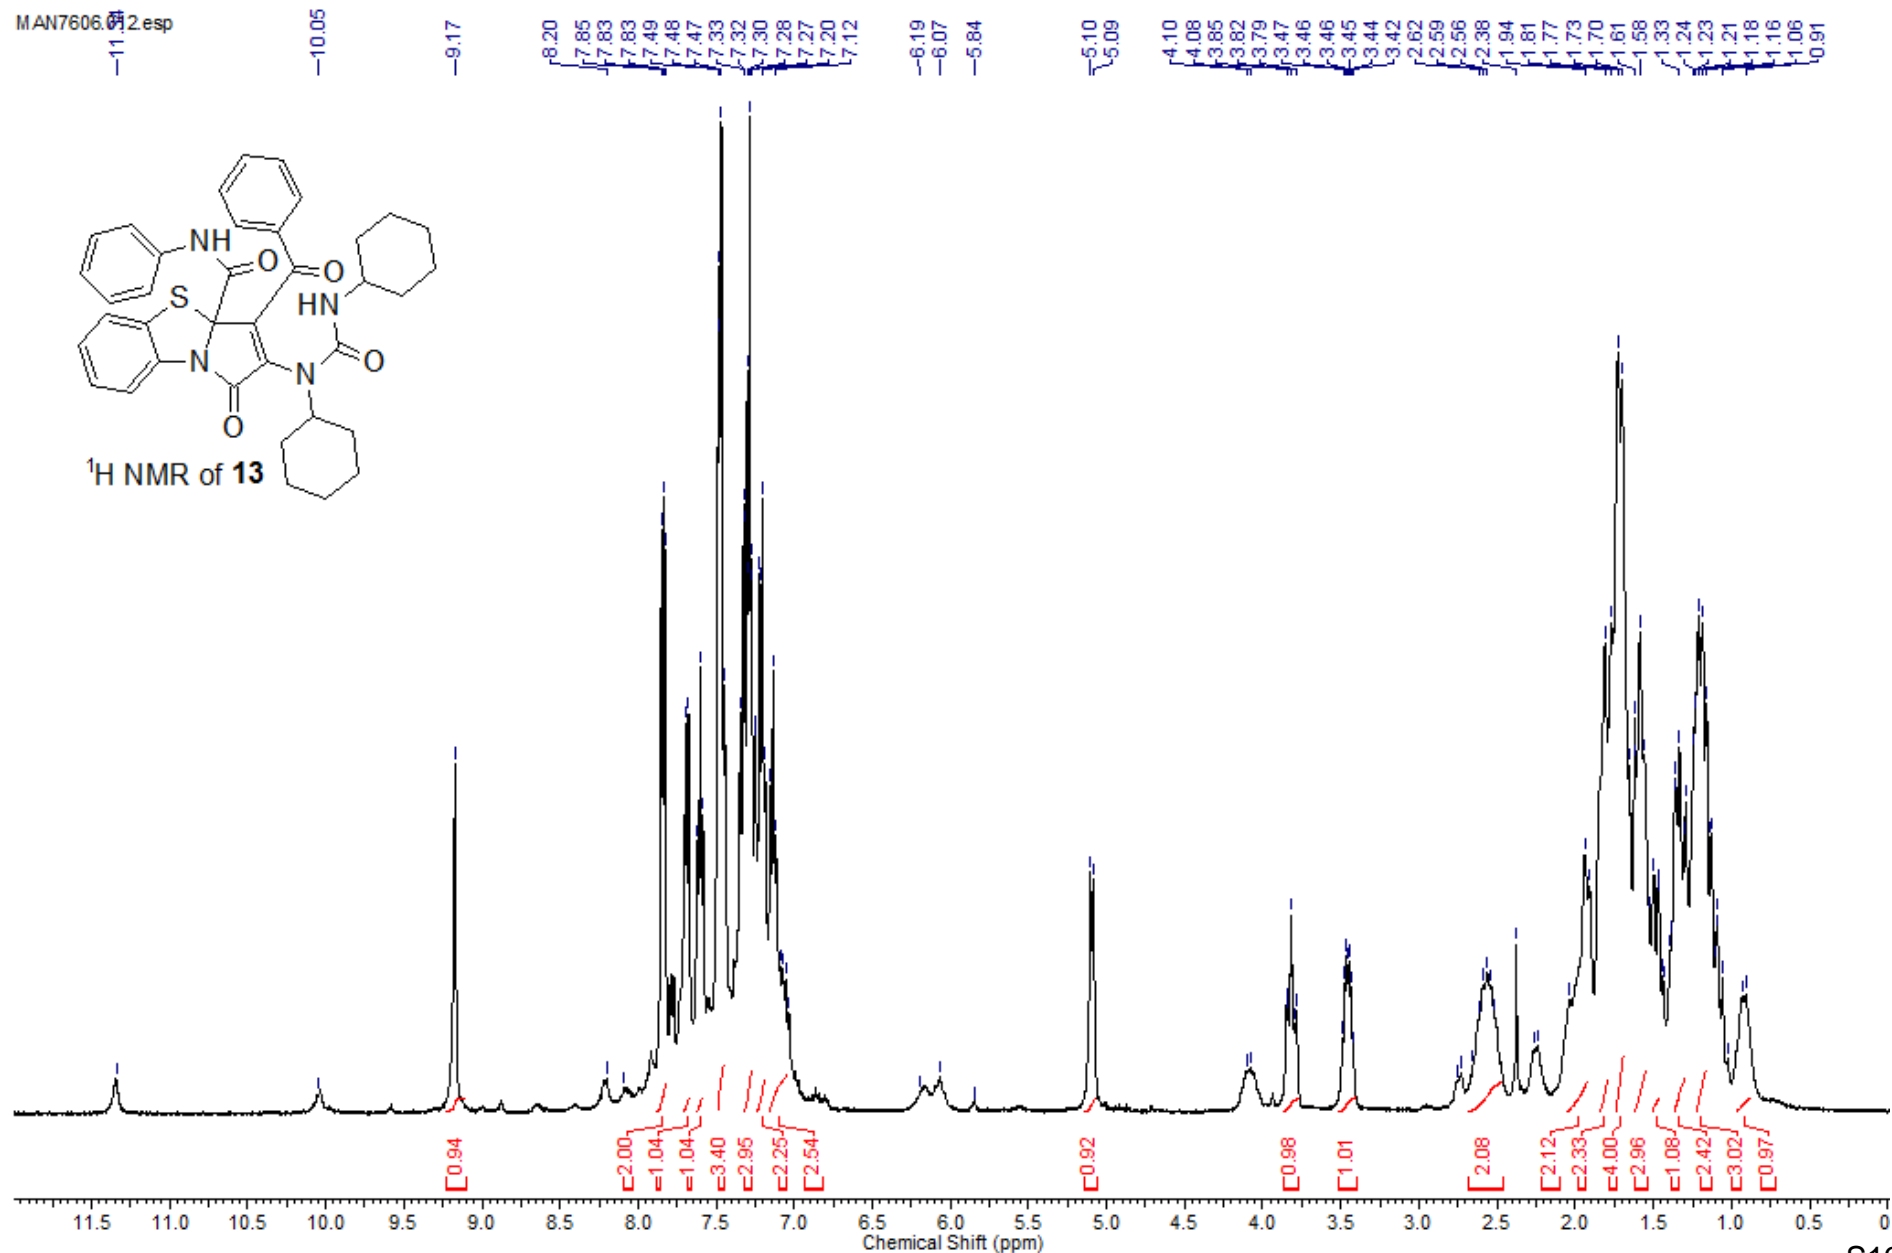

MAN760013.esp

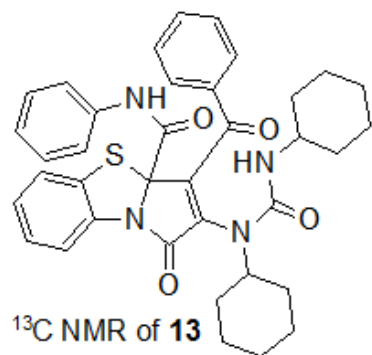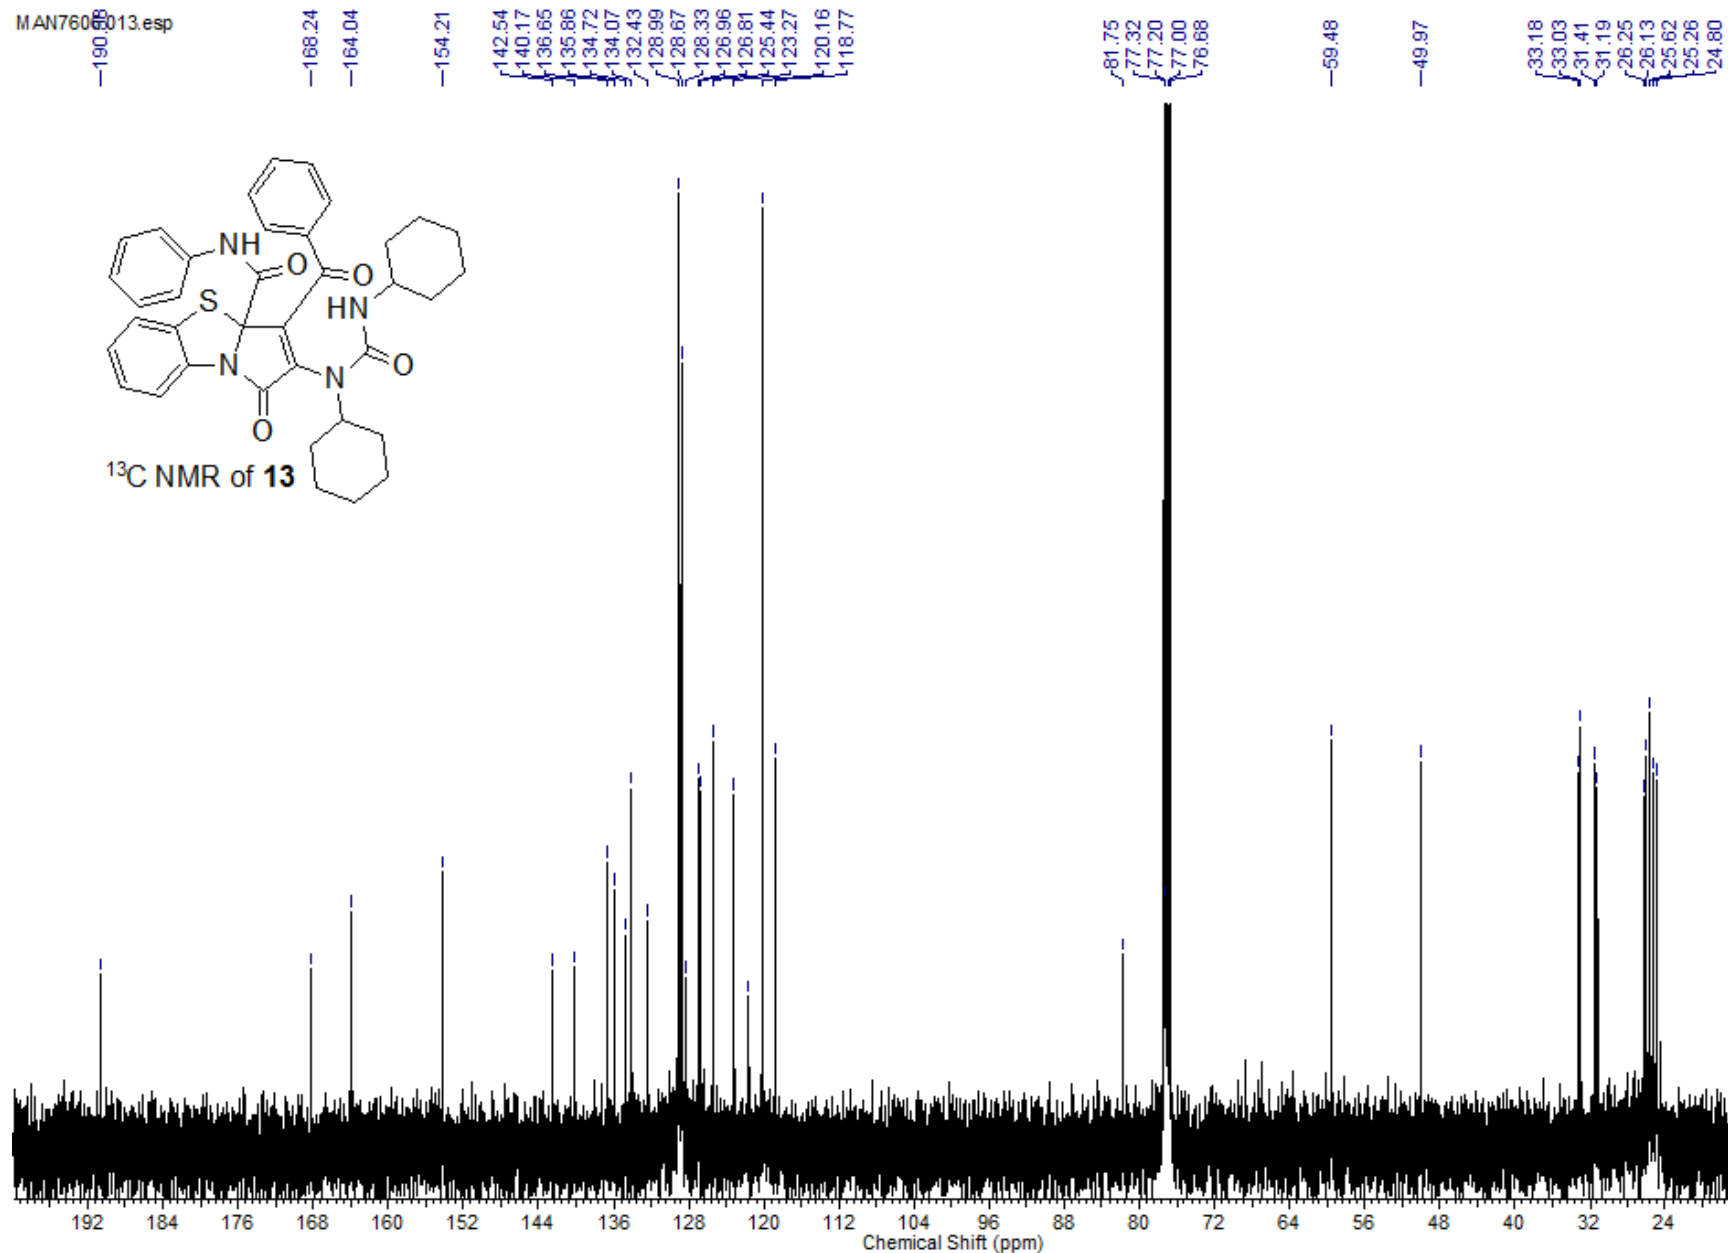

MAN7606.014.esp

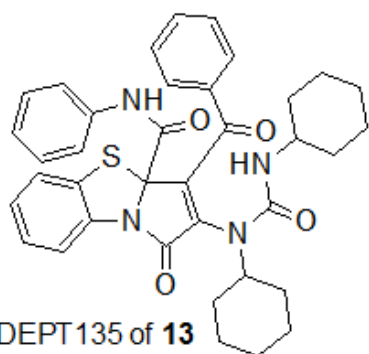

134.07  
128.99  
128.67  
126.96  
126.82  
125.44  
123.27  
120.16  
118.77

59.49

49.97

33.18  
31.41  
31.20  
26.25  
26.13  
25.62  
25.26  
24.87  
24.80

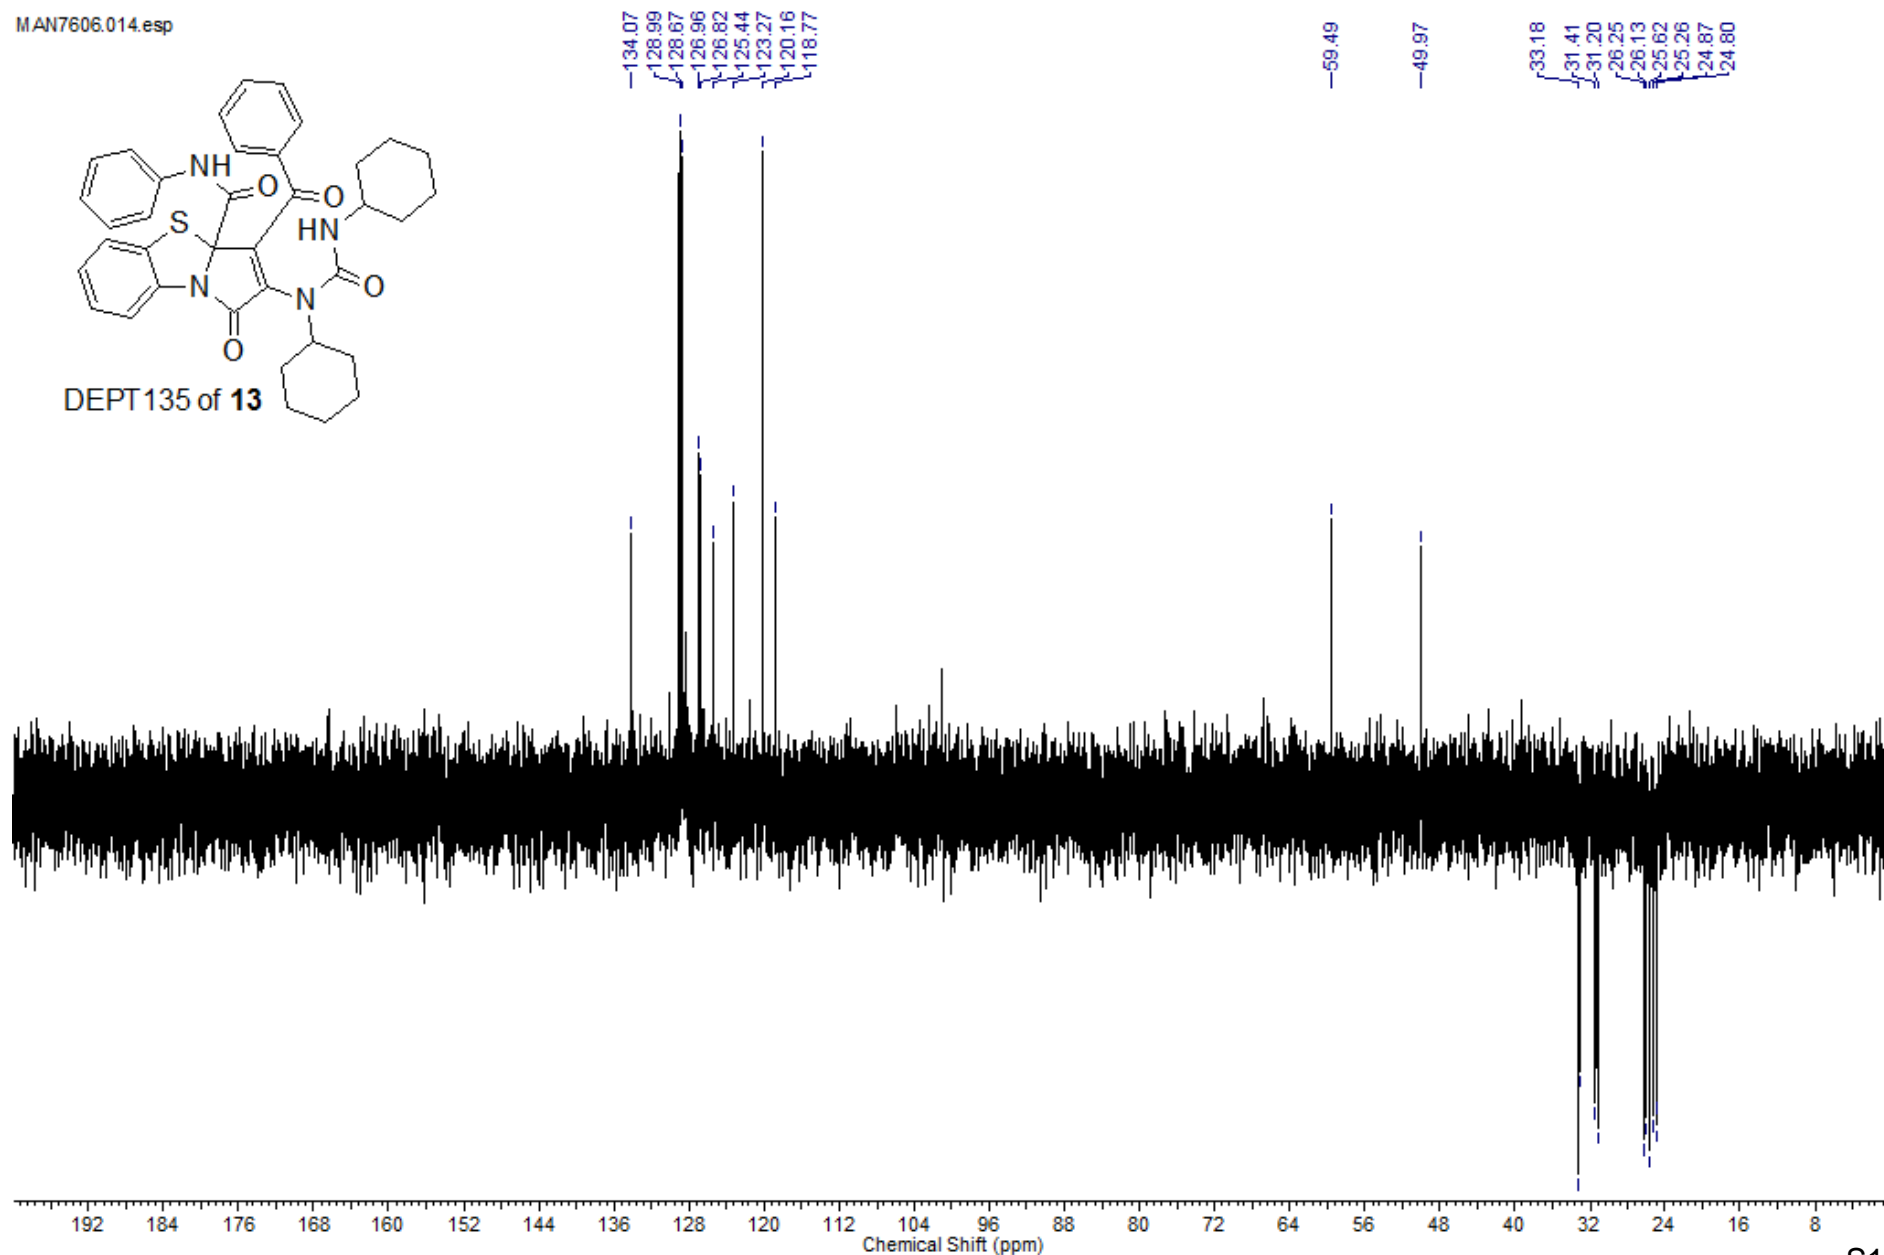

## Crystal structure determination

The unit cell parameters and the X-ray diffraction intensities were measured on a Xcalibur Ruby diffractometer. The empirical absorption correction was introduced by multi-scan method using SCALE3 ABSPACK algorithm [6]. Using the Olex2 [7], the structures were solved with the SHELXS [8] or SUPERFLIP [9] or SHELXT [10] programs and refined by the full-matrix least-squares method in the anisotropic approximation for all non-hydrogen atoms with the SHELXL program [11]. Hydrogen atoms bound to carbon were positioned geometrically and refined using a riding model. The hydrogen atoms of NH and OH groups were refined independently with isotropic displacement parameters.

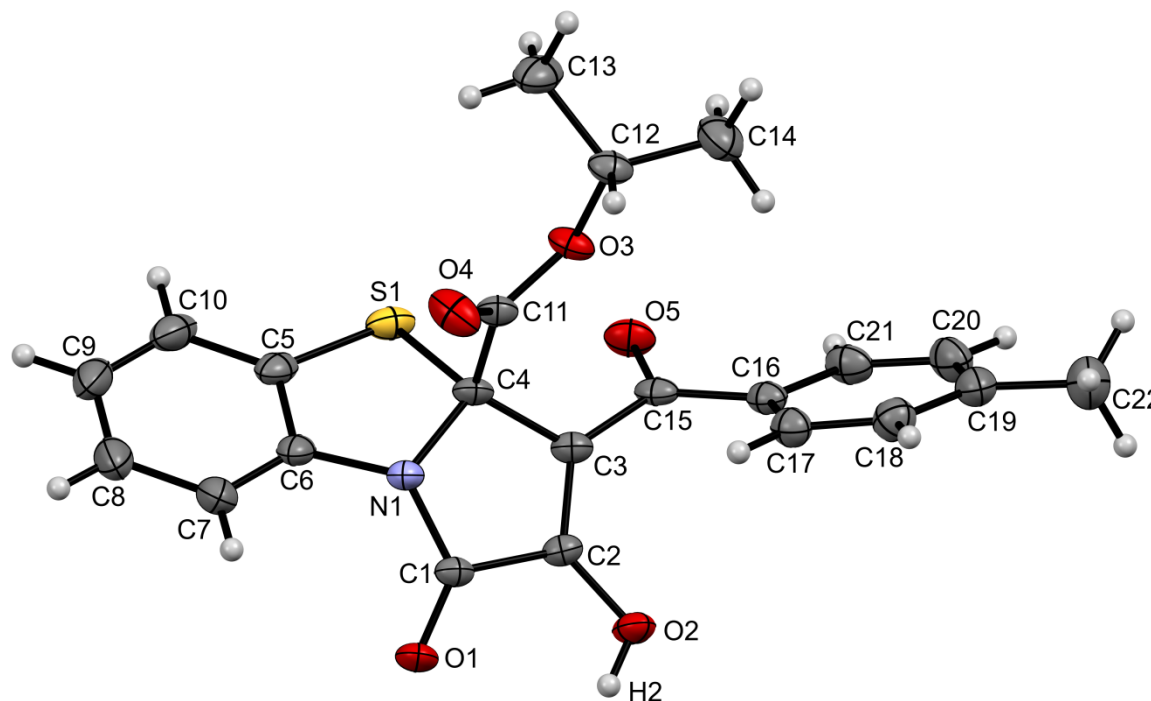

**Figure S1.** Molecular structure of compound **3bb** showing 30% probability amplitude displacement ellipsoids (CCDC 2241415).

Table S1. Crystal data and structure refinement for compound **3bb** (CCDC 2241415).

|                   |                                                   |
|-------------------|---------------------------------------------------|
| Empirical formula | C <sub>22</sub> H <sub>19</sub> NO <sub>5</sub> S |
| Formula weight    | 409.44                                            |

|                                           |                                                               |
|-------------------------------------------|---------------------------------------------------------------|
| Temperature, K                            | 295.15                                                        |
| Crystal system                            | triclinic                                                     |
| Space group                               | P-1                                                           |
| a, Å                                      | 9.537(2)                                                      |
| b, Å                                      | 10.544(2)                                                     |
| c, Å                                      | 11.320(2)                                                     |
| $\alpha$ , °                              | 77.678(18)                                                    |
| $\beta$ , °                               | 77.451(18)                                                    |
| $\gamma$ , °                              | 64.45(2)                                                      |
| Volume, Å <sup>3</sup>                    | 993.2(4)                                                      |
| Z                                         | 2                                                             |
| Density (calculated), g/cm <sup>3</sup>   | 1.369                                                         |
| Absorption coefficient, mm <sup>-1</sup>  | 0.197                                                         |
| F(000)                                    | 428.0                                                         |
| Crystal size, mm <sup>3</sup>             | 0.45 × 0.22 × 0.1                                             |
| Radiation                                 | MoK $\alpha$ ( $\lambda$ = 0.71073)                           |
| 2 $\theta$ range for data collection, °   | 6.076 to 58.958                                               |
| Index ranges                              | -11 ≤ h ≤ 12, -14 ≤ k ≤ 14, -15 ≤ l ≤ 12                      |
| Reflections collected                     | 8137                                                          |
| Independent reflections                   | 4635 [R <sub>int</sub> = 0.0415, R <sub>sigma</sub> = 0.0658] |
| Data/restraints/parameters                | 4635/0/269                                                    |
| Goodness-of-fit on F <sup>2</sup>         | 1.031                                                         |
| Final R indexes [ $I \geq 2\sigma(I)$ ]   | R <sub>1</sub> = 0.0567, wR <sub>2</sub> = 0.1359             |
| Final R indexes [all data]                | R <sub>1</sub> = 0.0871, wR <sub>2</sub> = 0.1668             |
| Largest diff. peak/hole, eÅ <sup>-3</sup> | 0.37/-0.43                                                    |

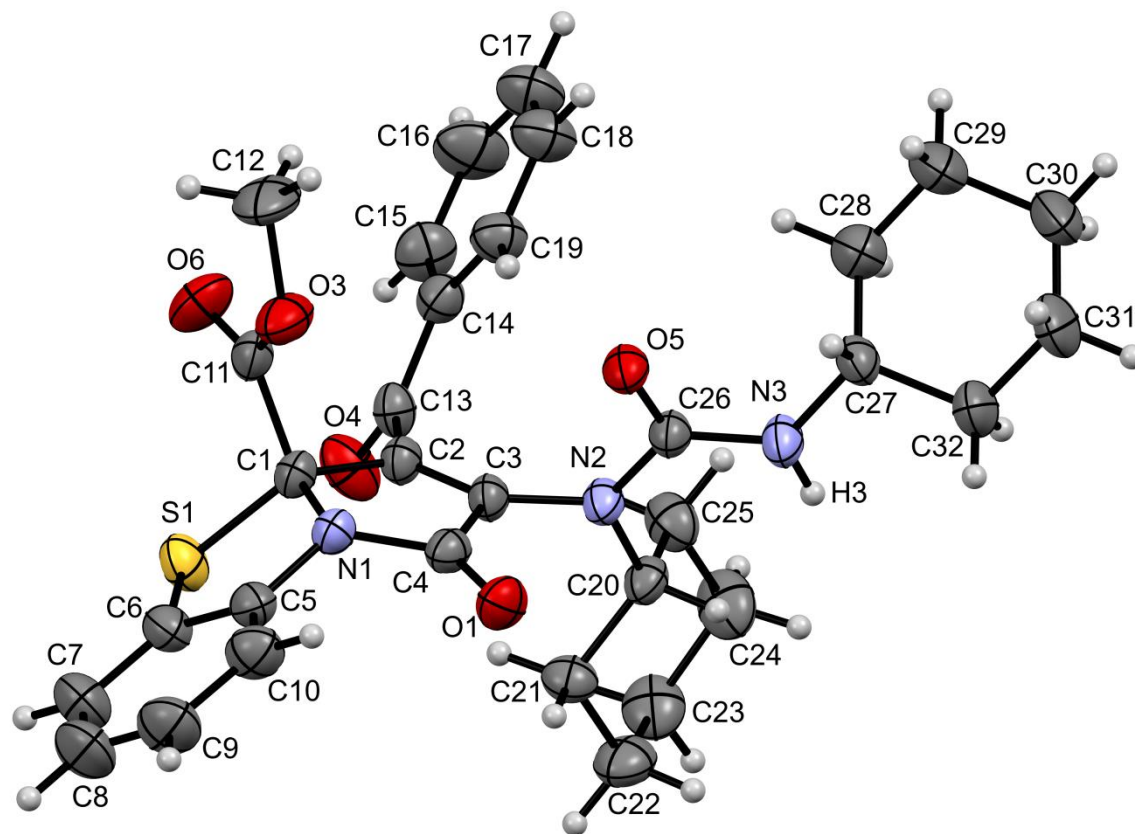

**Figure S2.** Molecular structure of compound **4** showing 30% probability amplitude displacement ellipsoids (CCDC 2241420). Only one independent molecule is shown.

Table S2. Crystal data and structure refinement for compound **4** (CCDC 2241420).

|                   |                                                                 |
|-------------------|-----------------------------------------------------------------|
| Empirical formula | C <sub>32</sub> H <sub>35</sub> N <sub>3</sub> O <sub>5</sub> S |
| Formula weight    | 573.69                                                          |
| Temperature, K    | 295(2)                                                          |
| Crystal system    | monoclinic                                                      |
| Space group       | P2 <sub>1</sub> /c                                              |

|                                           |                                                                |
|-------------------------------------------|----------------------------------------------------------------|
| a, Å                                      | 21.418(3)                                                      |
| b, Å                                      | 10.8298(12)                                                    |
| c, Å                                      | 26.026(4)                                                      |
| $\alpha$ , °                              | 90                                                             |
| $\beta$ , °                               | 97.009(14)                                                     |
| $\gamma$ , °                              | 90                                                             |
| Volume, Å <sup>3</sup>                    | 5991.6(15)                                                     |
| Z                                         | 8                                                              |
| Density (calculated), g/cm <sup>3</sup>   | 1.272                                                          |
| Absorption coefficient, mm <sup>-1</sup>  | 0.153                                                          |
| F(000)                                    | 2432.0                                                         |
| Crystal size, mm <sup>3</sup>             | 0.48 × 0.26 × 0.03                                             |
| Radiation                                 | Mo K $\alpha$ ( $\lambda$ = 0.71073)                           |
| 2 $\theta$ range for data collection, °   | 3.884 to 59.078                                                |
| Index ranges                              | -17 ≤ h ≤ 29, -11 ≤ k ≤ 14, -32 ≤ l ≤ 33                       |
| Reflections collected                     | 37522                                                          |
| Independent reflections                   | 14218 [R <sub>int</sub> = 0.0662, R <sub>sigma</sub> = 0.0881] |
| Data/restraints/parameters                | 14218/51/862                                                   |
| Goodness-of-fit on F <sup>2</sup>         | 1.014                                                          |
| Final R indexes [ $I \geq 2\sigma(I)$ ]   | R <sub>1</sub> = 0.0719, wR <sub>2</sub> = 0.1690              |
| Final R indexes [all data]                | R <sub>1</sub> = 0.1724, wR <sub>2</sub> = 0.2375              |
| Largest diff. peak/hole, eÅ <sup>-3</sup> | 0.27/-0.37                                                     |



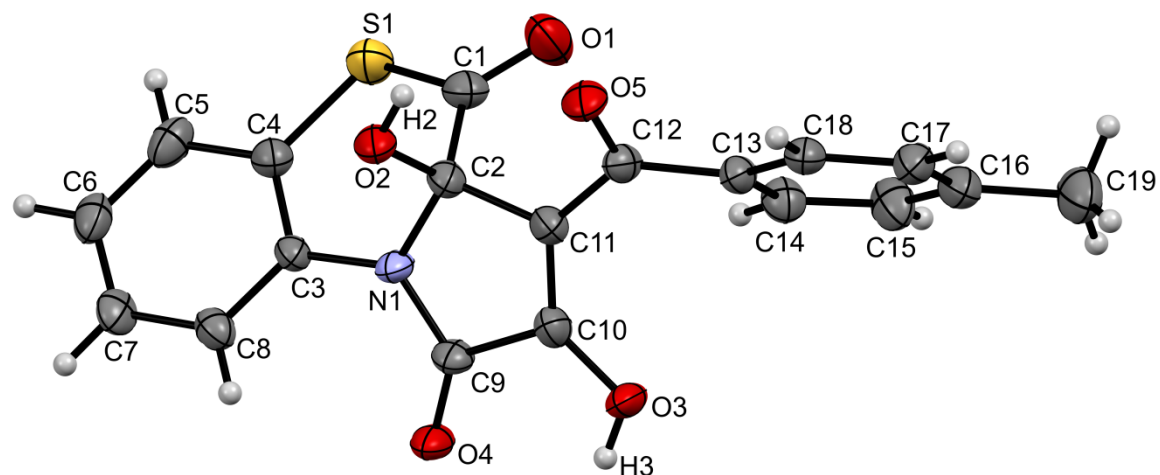

**Figure S3.** Molecular structure of compound **6b** showing 30% probability amplitude displacement ellipsoids (CCDC 2241419). Toluene solvate molecule is not shown.

Table S3. Crystal data and structure refinement for compound **6b** (CCDC 2241419).

|                        |                                                                               |
|------------------------|-------------------------------------------------------------------------------|
| Empirical formula      | C <sub>45</sub> H <sub>34</sub> N <sub>2</sub> O <sub>10</sub> S <sub>2</sub> |
| Formula weight         | 826.86                                                                        |
| Temperature, K         | 295.15                                                                        |
| Crystal system         | monoclinic                                                                    |
| Space group            | P2 <sub>1</sub> /c                                                            |
| a, Å                   | 13.007(5)                                                                     |
| b, Å                   | 7.100(3)                                                                      |
| c, Å                   | 21.848(7)                                                                     |
| α, °                   | 90                                                                            |
| β, °                   | 103.36(4)                                                                     |
| γ, °                   | 90                                                                            |
| Volume, Å <sup>3</sup> | 1963.1(14)                                                                    |
| Z                      | 2                                                                             |

|                                           |                                                               |
|-------------------------------------------|---------------------------------------------------------------|
| Density (calculated), g/cm <sup>3</sup>   | 1.399                                                         |
| Absorption coefficient, mm <sup>-1</sup>  | 0.200                                                         |
| F(000)                                    | 860.0                                                         |
| Crystal size, mm <sup>3</sup>             | 0.2 × 0.15 × 0.1                                              |
| Radiation                                 | Mo K $\alpha$ ( $\lambda$ = 0.71073)                          |
| 2 $\theta$ range for data collection, °   | 5.546 to 58.886                                               |
| Index ranges                              | -16 ≤ h ≤ 15, -9 ≤ k ≤ 8, -20 ≤ l ≤ 29                        |
| Reflections collected                     | 9806                                                          |
| Independent reflections                   | 4671 [R <sub>int</sub> = 0.0963, R <sub>sigma</sub> = 0.1465] |
| Data/restraints/parameters                | 4671/62/290                                                   |
| Goodness-of-fit on F <sup>2</sup>         | 1.018                                                         |
| Final R indexes [ $I \geq 2\sigma(I)$ ]   | R <sub>1</sub> = 0.1048, wR <sub>2</sub> = 0.2618             |
| Final R indexes [all data]                | R <sub>1</sub> = 0.2127, wR <sub>2</sub> = 0.3520             |
| Largest diff. peak/hole, eÅ <sup>-3</sup> | 0.44/-0.36                                                    |

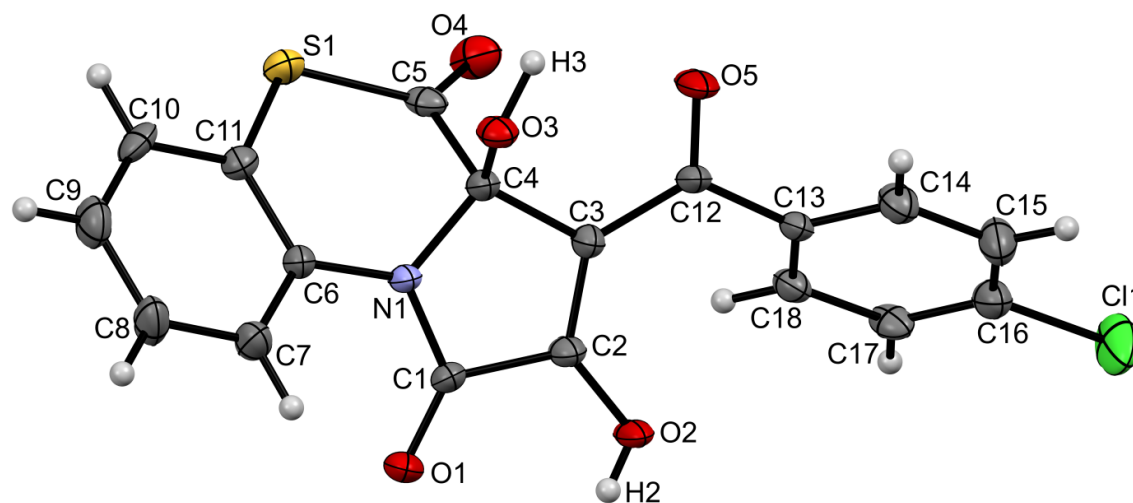

**Figure S4.** Molecular structure of compound **6e** showing 30% probability amplitude displacement ellipsoids (CCDC 2241423).

Table S4. Crystal data and structure refinement for compound **6e** (CCDC 2241423).

|                                           |                                                               |
|-------------------------------------------|---------------------------------------------------------------|
| Empirical formula                         | C <sub>18</sub> H <sub>10</sub> CINO <sub>5</sub> S           |
| Formula weight                            | 387.78                                                        |
| Temperature, K                            | 295.15                                                        |
| Crystal system                            | monoclinic                                                    |
| Space group                               | Cc                                                            |
| a, Å                                      | 15.639(5)                                                     |
| b, Å                                      | 15.684(7)                                                     |
| c, Å                                      | 6.932(2)                                                      |
| α, °                                      | 90                                                            |
| β, °                                      | 101.27(3)                                                     |
| γ, °                                      | 90                                                            |
| Volume, Å <sup>3</sup>                    | 1667.4(10)                                                    |
| Z                                         | 4                                                             |
| Density (calculated), g/cm <sup>3</sup>   | 1.545                                                         |
| Absorption coefficient, mm <sup>-1</sup>  | 0.385                                                         |
| F(000)                                    | 792.0                                                         |
| Crystal size, mm <sup>3</sup>             | 0.5 × 0.04 × 0.03                                             |
| Radiation                                 | Mo Kα (λ = 0.71073)                                           |
| 2θ range for data collection, °           | 6.596 to 58.576                                               |
| Index ranges                              | -14 ≤ h ≤ 20, -21 ≤ k ≤ 19, -9 ≤ l ≤ 9                        |
| Reflections collected                     | 3836                                                          |
| Independent reflections                   | 2644 [R <sub>int</sub> = 0.0403, R <sub>sigma</sub> = 0.0668] |
| Data/restraints/parameters                | 2644/2/243                                                    |
| Goodness-of-fit on F <sup>2</sup>         | 0.976                                                         |
| Final R indexes [I ≥ 2σ (I)]              | R <sub>1</sub> = 0.0536, wR <sub>2</sub> = 0.1360             |
| Final R indexes [all data]                | R <sub>1</sub> = 0.0717, wR <sub>2</sub> = 0.1618             |
| Largest diff. peak/hole, eÅ <sup>-3</sup> | 0.26/-0.33                                                    |

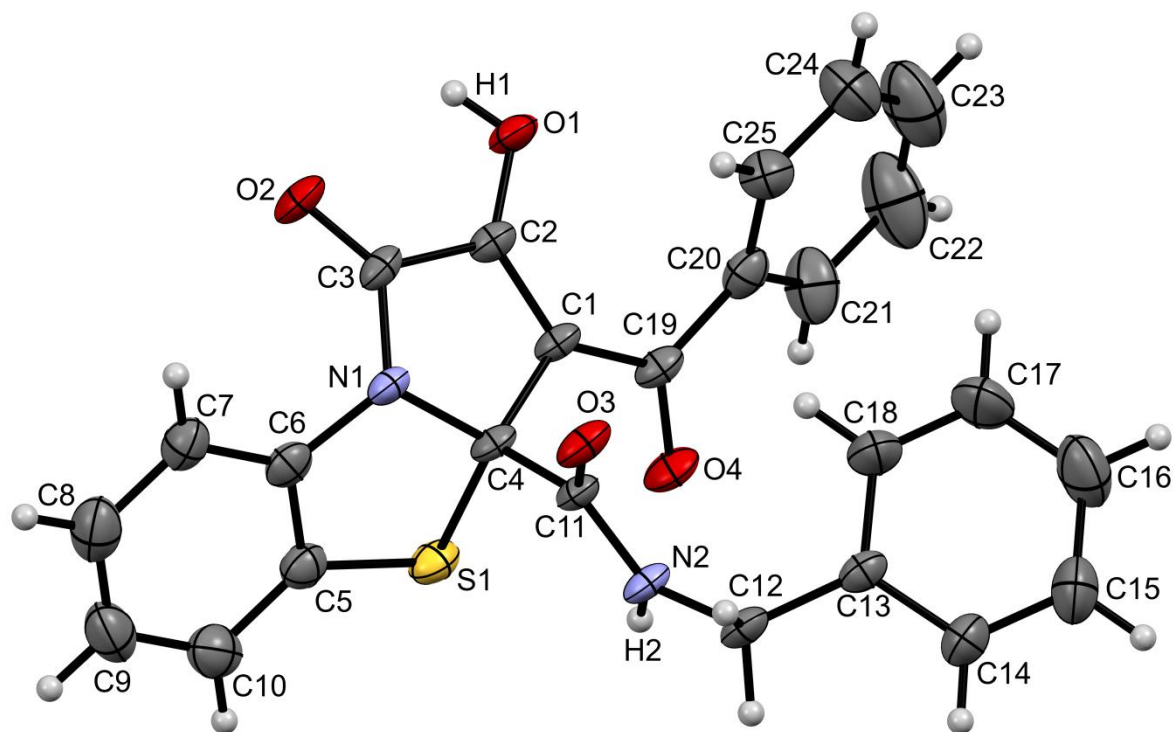

**Figure S5.** Molecular structure of compound **7a** showing 30% probability amplitude displacement ellipsoids (CCDC 2241418). Only one independent molecule is shown.

Table S5. Crystal data and structure refinement for compound **7a** (CCDC 2241418).

|                   |                                                                 |
|-------------------|-----------------------------------------------------------------|
| Empirical formula | C <sub>25</sub> H <sub>18</sub> N <sub>2</sub> O <sub>4</sub> S |
| Formula weight    | 442.47                                                          |
| Temperature, K    | 295.15                                                          |
| Crystal system    | monoclinic                                                      |
| Space group       | P2 <sub>1</sub> /n                                              |
| a, Å              | 25.308(6)                                                       |

|                                           |                                                                |
|-------------------------------------------|----------------------------------------------------------------|
| b, Å                                      | 20.678(4)                                                      |
| c, Å                                      | 8.2996(14)                                                     |
| $\alpha$ , °                              | 90                                                             |
| $\beta$ , °                               | 90.66(2)                                                       |
| $\gamma$ , °                              | 90                                                             |
| Volume, Å <sup>3</sup>                    | 4343.1(16)                                                     |
| Z                                         | 8                                                              |
| Density (calculated), g/cm <sup>3</sup>   | 1.353                                                          |
| Absorption coefficient, mm <sup>-1</sup>  | 0.184                                                          |
| F(000)                                    | 1840.0                                                         |
| Crystal size, mm <sup>3</sup>             | 0.45 × 0.2 × 0.05                                              |
| Radiation                                 | Mo K $\alpha$ ( $\lambda$ = 0.71073)                           |
| 2 $\theta$ range for data collection, °   | 5.512 to 59.072                                                |
| Index ranges                              | -32 ≤ h ≤ 23, -26 ≤ k ≤ 28, -11 ≤ l ≤ 11                       |
| Reflections collected                     | 24909                                                          |
| Independent reflections                   | 10334 [R <sub>int</sub> = 0.0737, R <sub>sigma</sub> = 0.1009] |
| Data/restraints/parameters                | 10334/0/593                                                    |
| Goodness-of-fit on F <sup>2</sup>         | 1.044                                                          |
| Final R indexes [ $I \geq 2\sigma(I)$ ]   | R <sub>1</sub> = 0.0936, wR <sub>2</sub> = 0.2133              |
| Final R indexes [all data]                | R <sub>1</sub> = 0.1866, wR <sub>2</sub> = 0.2756              |
| Largest diff. peak/hole, eÅ <sup>-3</sup> | 0.59/-0.36                                                     |

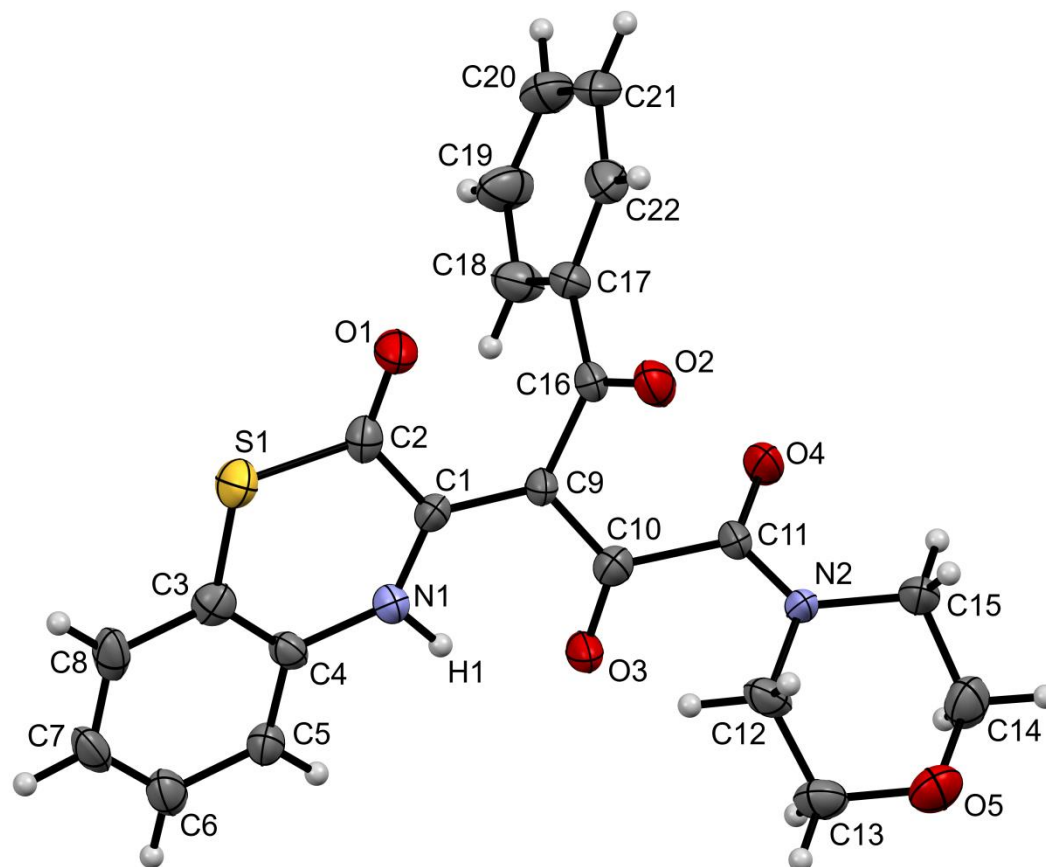

**Figure S6.** Molecular structure of compound **10a** showing 30% probability amplitude displacement ellipsoids (CCDC 2241424).

Table S6. Crystal data and structure refinement for compound **10a** (CCDC 2241424).

|                   |                                                                 |
|-------------------|-----------------------------------------------------------------|
| Empirical formula | C <sub>22</sub> H <sub>18</sub> N <sub>2</sub> O <sub>5</sub> S |
| Formula weight    | 422.44                                                          |
| Temperature, K    | 295.15                                                          |
| Crystal system    | monoclinic                                                      |
| Space group       | P2 <sub>1</sub> /c                                              |

|                                           |                                                               |
|-------------------------------------------|---------------------------------------------------------------|
| a, Å                                      | 10.138(6)                                                     |
| b, Å                                      | 19.732(10)                                                    |
| c, Å                                      | 10.477(6)                                                     |
| $\alpha$ , °                              | 90                                                            |
| $\beta$ , °                               | 110.91(7)                                                     |
| $\gamma$ , °                              | 90                                                            |
| Volume, Å <sup>3</sup>                    | 1958(2)                                                       |
| Z                                         | 4                                                             |
| Density (calculated), g/cm <sup>3</sup>   | 1.433                                                         |
| Absorption coefficient, mm <sup>-1</sup>  | 0.204                                                         |
| F(000)                                    | 880.0                                                         |
| Crystal size, mm <sup>3</sup>             | 0.18 × 0.12 × 0.02                                            |
| Radiation                                 | Mo K $\alpha$ ( $\lambda$ = 0.71073)                          |
| 2 $\theta$ range for data collection, °   | 4.3 to 59.088                                                 |
| Index ranges                              | -13 ≤ h ≤ 7, -26 ≤ k ≤ 17, -9 ≤ l ≤ 14                        |
| Reflections collected                     | 10529                                                         |
| Independent reflections                   | 4689 [R <sub>int</sub> = 0.1091, R <sub>sigma</sub> = 0.2422] |
| Data/restraints/parameters                | 4689/0/274                                                    |
| Goodness-of-fit on F <sup>2</sup>         | 1.003                                                         |
| Final R indexes [ $I \geq 2\sigma(I)$ ]   | R <sub>1</sub> = 0.0938, wR <sub>2</sub> = 0.1588             |
| Final R indexes [all data]                | R <sub>1</sub> = 0.2970, wR <sub>2</sub> = 0.2309             |
| Largest diff. peak/hole, eÅ <sup>-3</sup> | 0.30/-0.29                                                    |

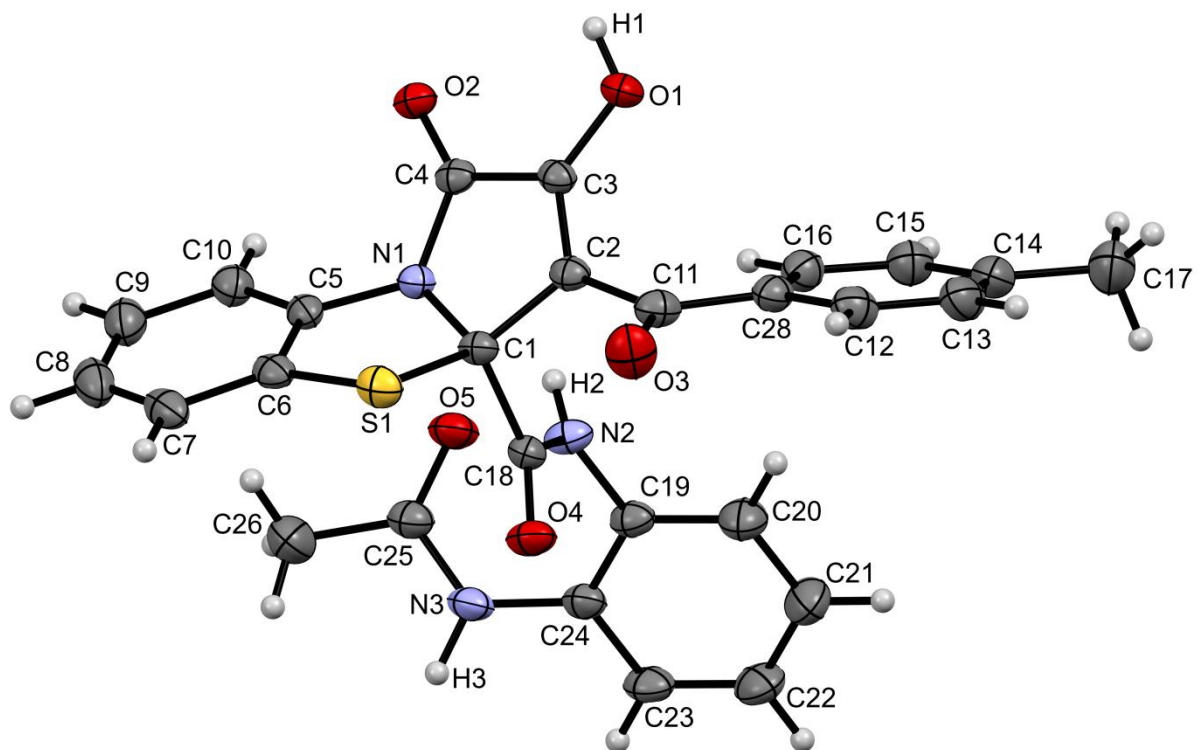

**Figure S7.** Molecular structure of compound **12bd** showing 30% probability amplitude displacement ellipsoids (CCDC 2241422). Toluene solvate molecule is not shown.

Table S7. Crystal data and structure refinement for compound **12bd** (CCDC 2241422).

|                   |                                                                               |
|-------------------|-------------------------------------------------------------------------------|
| Empirical formula | C <sub>61</sub> H <sub>50</sub> N <sub>6</sub> O <sub>10</sub> S <sub>2</sub> |
| Formula weight    | 1091.19                                                                       |
| Temperature, K    | 295.15                                                                        |
| Crystal system    | triclinic                                                                     |
| Space group       | P-1                                                                           |
| a, Å              | 8.7224(14)                                                                    |
| b, Å              | 12.811(2)                                                                     |



|                                           |                                                                |
|-------------------------------------------|----------------------------------------------------------------|
| c, Å                                      | 13.709(2)                                                      |
| $\alpha$ , °                              | 62.649(16)                                                     |
| $\beta$ , °                               | 80.597(13)                                                     |
| $\gamma$ , °                              | 77.287(14)                                                     |
| Volume, Å <sup>3</sup>                    | 1323.9(4)                                                      |
| Z                                         | 1                                                              |
| Density (calculated), g/cm <sup>3</sup>   | 1.369                                                          |
| Absorption coefficient, mm <sup>-1</sup>  | 0.169                                                          |
| F(000)                                    | 570.0                                                          |
| Crystal size, mm <sup>3</sup>             | 0.4 × 0.08 × 0.06                                              |
| Radiation                                 | Mo K $\alpha$ ( $\lambda$ = 0.71073)                           |
| 2 $\theta$ range for data collection, °   | 4.8 to 58.982                                                  |
| Index ranges                              | -11 ≤ h ≤ 11, -15 ≤ k ≤ 16, -18 ≤ l ≤ 18                       |
| Reflections collected                     | 12095                                                          |
| Independent reflections                   | 6193 [ $R_{\text{int}}$ = 0.0432, $R_{\text{sigma}}$ = 0.0725] |
| Data/restraints/parameters                | 6193/71/402                                                    |
| Goodness-of-fit on F <sup>2</sup>         | 1.061                                                          |
| Final R indexes [ $I \geq 2\sigma(I)$ ]   | $R_1$ = 0.0661, $wR_2$ = 0.1525                                |
| Final R indexes [all data]                | $R_1$ = 0.1112, $wR_2$ = 0.1859                                |
| Largest diff. peak/hole, eÅ <sup>-3</sup> | 0.30/-0.43                                                     |

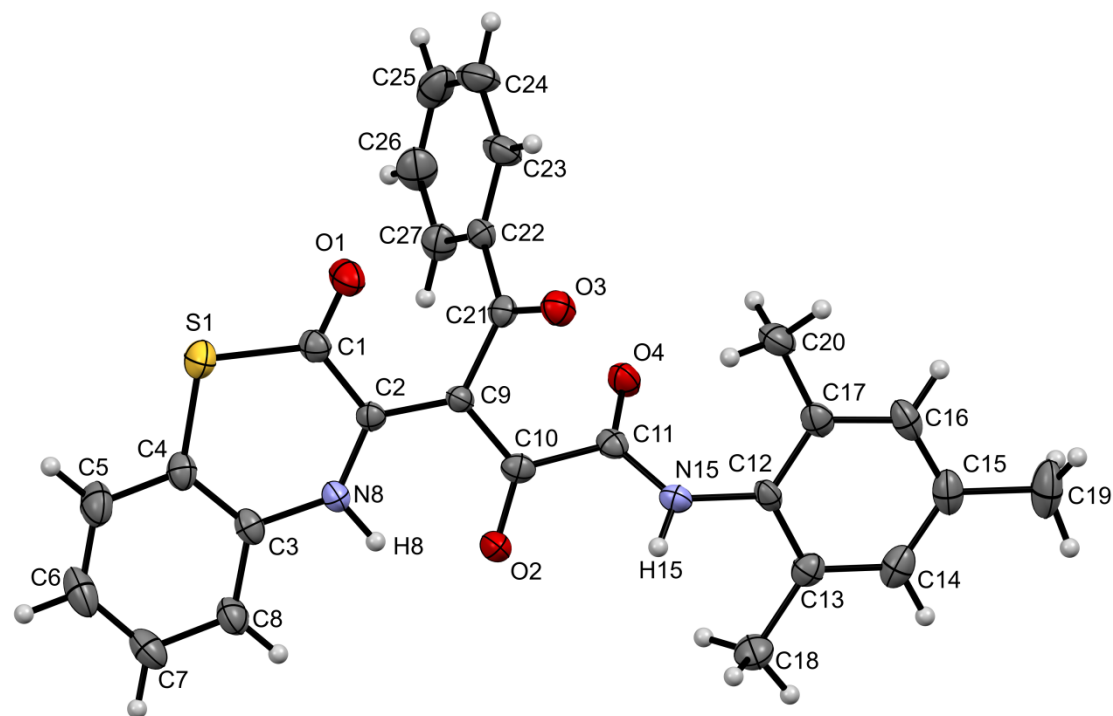

**Figure S8.** Molecular structure of compound **14ab** showing 30% probability amplitude displacement ellipsoids (CCDC 2241416). Dichloromethane solvate molecule is not shown.

Table S8. Crystal data and structure refinement for compound **14ab** (CCDC 2241416).

|                   |                                                                                 |
|-------------------|---------------------------------------------------------------------------------|
| Empirical formula | C <sub>28</sub> H <sub>24</sub> Cl <sub>2</sub> N <sub>2</sub> O <sub>4</sub> S |
| Formula weight    | 555.45                                                                          |
| Temperature, K    | 295                                                                             |
| Crystal system    | triclinic                                                                       |
| Space group       | P-1                                                                             |
| a, Å              | 10.927(2)                                                                       |
| b, Å              | 10.962(2)                                                                       |
| c, Å              | 12.606(2)                                                                       |

|                                           |                                                   |
|-------------------------------------------|---------------------------------------------------|
| $\alpha$ , °                              | 101.113(19)                                       |
| $\beta$ , °                               | 95.903(16)                                        |
| $\gamma$ , °                              | 115.32(2)                                         |
| Volume, Å <sup>3</sup>                    | 1309.7(5)                                         |
| Z                                         | 2                                                 |
| Density (calculated), g/cm <sup>3</sup>   | 1.409                                             |
| Absorption coefficient, mm <sup>-1</sup>  | 0.366                                             |
| F(000)                                    | 576.0                                             |
| Crystal size, mm <sup>3</sup>             | 0.35 × 0.25 × 0.1                                 |
| Radiation                                 | Mo K $\alpha$ ( $\lambda$ = 0.71073)              |
| 2 $\theta$ range for data collection, °   | 4.218 to 59.14                                    |
| Index ranges                              | -14 ≤ h ≤ 15, -14 ≤ k ≤ 14, -16 ≤ l ≤ 16          |
| Reflections collected                     | 9308                                              |
| Independent reflections                   | 9308 [R <sub>sigma</sub> = 0.1393]                |
| Data/restraints/parameters                | 9308/0/346                                        |
| Goodness-of-fit on F <sup>2</sup>         | 0.836                                             |
| Final R indexes [ $ I  \geq 2\sigma(I)$ ] | R <sub>1</sub> = 0.0619, wR <sub>2</sub> = 0.1364 |
| Final R indexes [all data]                | R <sub>1</sub> = 0.1564, wR <sub>2</sub> = 0.1550 |
| Largest diff. peak/hole, eÅ <sup>-3</sup> | 0.24/-0.29                                        |
| Refined twin ratio                        | 0.5771(12) : 0.4229(12)                           |

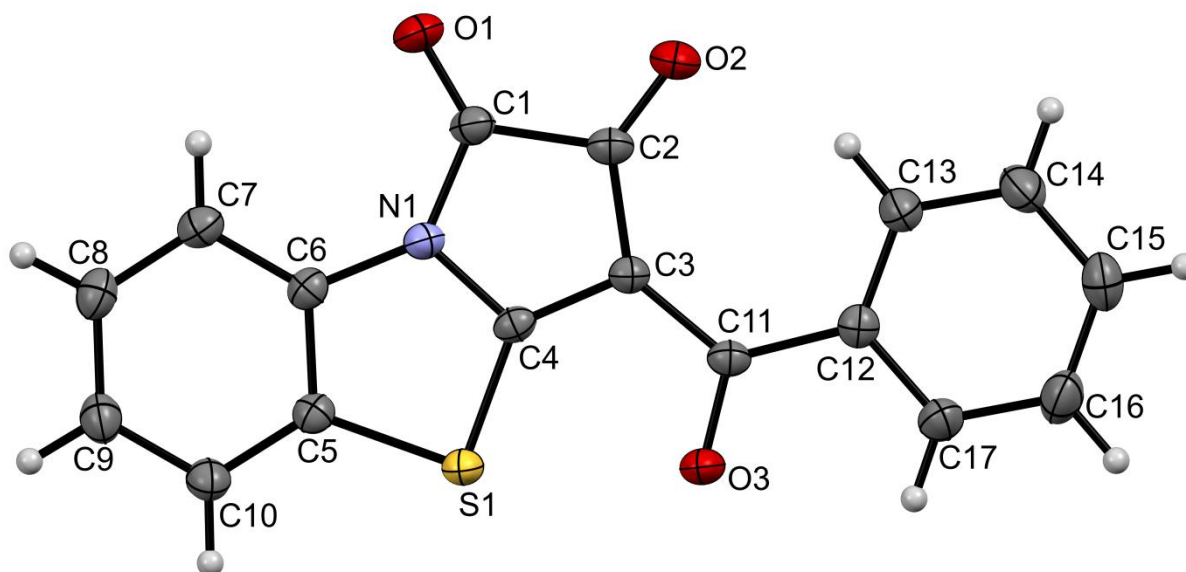

**Figure S9.** Molecular structure of compound **17a** showing 30% probability amplitude displacement ellipsoids (CCDC 2241421).

Table S9. Crystal data and structure refinement for compound **17a** (CCDC 2241421).

|                        |                                                  |
|------------------------|--------------------------------------------------|
| Empirical formula      | C <sub>17</sub> H <sub>9</sub> NO <sub>3</sub> S |
| Formula weight         | 307.31                                           |
| Temperature, K         | 295.15                                           |
| Crystal system         | monoclinic                                       |
| Space group            | I2/c                                             |
| a, Å                   | 20.969(6)                                        |
| b, Å                   | 5.1385(14)                                       |
| c, Å                   | 25.282(6)                                        |
| α, °                   | 90                                               |
| β, °                   | 102.34(3)                                        |
| γ, °                   | 90                                               |
| Volume, Å <sup>3</sup> | 2661.3(13)                                       |

|                                              |                                                               |
|----------------------------------------------|---------------------------------------------------------------|
| Z                                            | 8                                                             |
| Density (calculated), g/cm <sup>3</sup>      | 1.534                                                         |
| Absorption coefficient, mm <sup>-1</sup>     | 0.256                                                         |
| F(000)                                       | 1264.0                                                        |
| Crystal size, mm <sup>3</sup>                | 0.5 × 0.14 × 0.03                                             |
| Radiation                                    | Mo K $\alpha$ ( $\lambda$ = 0.71073)                          |
| 2 $\theta$ range for data collection, °      | 5.684 to 58.546                                               |
| Index ranges                                 | -19 ≤ h ≤ 28, -7 ≤ k ≤ 6, -33 ≤ l ≤ 34                        |
| Reflections collected                        | 7468                                                          |
| Independent reflections                      | 3158 [R <sub>int</sub> = 0.0389, R <sub>sigma</sub> = 0.0554] |
| Data/restraints/parameters                   | 3158/0/199                                                    |
| Goodness-of-fit on F <sup>2</sup>            | 1.037                                                         |
| Final R indexes [I ≥ 2 $\sigma$ (I)]         | R <sub>1</sub> = 0.0538, wR <sub>2</sub> = 0.1158             |
| Final R indexes [all data]                   | R <sub>1</sub> = 0.0819, wR <sub>2</sub> = 0.1388             |
| Largest diff. peak/hole, e $\text{\AA}^{-3}$ | 0.24/-0.43                                                    |

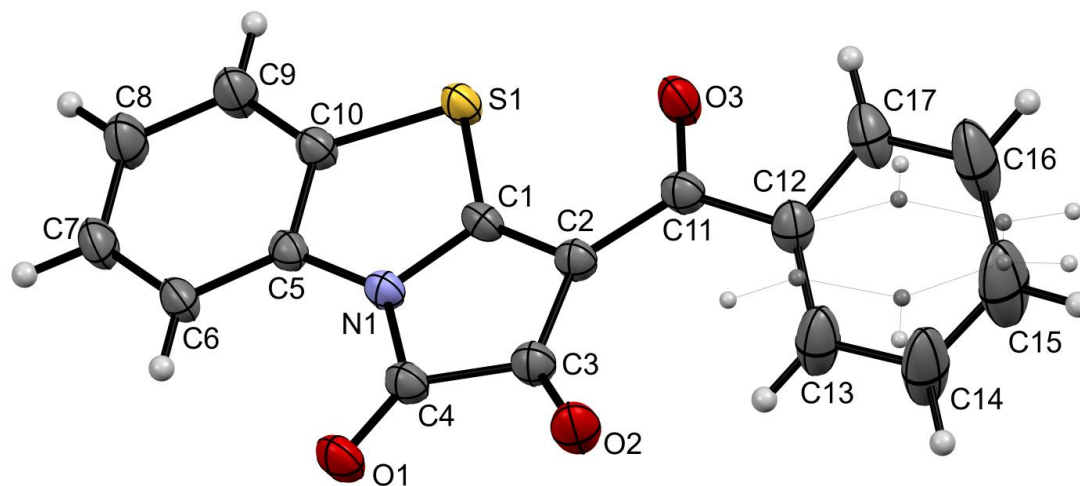

**Figure S10.** Molecular structure of compound **17a** showing 30% probability amplitude displacement ellipsoids (CCDC 2241417).

Table S10. Crystal data and structure refinement for compound **17a** (CCDC 2241417).

|                                           |                                                               |
|-------------------------------------------|---------------------------------------------------------------|
| Empirical formula                         | C <sub>17</sub> H <sub>9</sub> NO <sub>3</sub> S              |
| Formula weight                            | 307.31                                                        |
| Temperature, K                            | 295.15                                                        |
| Crystal system                            | monoclinic                                                    |
| Space group                               | P2 <sub>1</sub> /c                                            |
| a, Å                                      | 5.4696(15)                                                    |
| b, Å                                      | 26.985(8)                                                     |
| c, Å                                      | 9.099(3)                                                      |
| α, °                                      | 90                                                            |
| β, °                                      | 93.87(3)                                                      |
| γ, °                                      | 90                                                            |
| Volume, Å <sup>3</sup>                    | 1340.0(7)                                                     |
| Z                                         | 4                                                             |
| Density (calculated), g/cm <sup>3</sup>   | 1.523                                                         |
| Absorption coefficient, mm <sup>-1</sup>  | 0.254                                                         |
| F(000)                                    | 632.0                                                         |
| Crystal size, mm <sup>3</sup>             | 0.3 × 0.1 × 0.03                                              |
| Radiation                                 | Mo Kα (λ = 0.71073)                                           |
| 2θ range for data collection, °           | 6.04 to 58.478                                                |
| Index ranges                              | -7 ≤ h ≤ 6, -36 ≤ k ≤ 20, -12 ≤ l ≤ 11                        |
| Reflections collected                     | 6425                                                          |
| Independent reflections                   | 3152 [R <sub>int</sub> = 0.0544, R <sub>sigma</sub> = 0.0820] |
| Data/restraints/parameters                | 3152/135/245                                                  |
| Goodness-of-fit on F <sup>2</sup>         | 1.041                                                         |
| Final R indexes [I ≥ 2σ (I)]              | R <sub>1</sub> = 0.0683, wR <sub>2</sub> = 0.1592             |
| Final R indexes [all data]                | R <sub>1</sub> = 0.1262, wR <sub>2</sub> = 0.2119             |
| Largest diff. peak/hole, eÅ <sup>-3</sup> | 0.32/-0.35                                                    |

## References

1. Khramtsova, E. E.; Lystsova, E. A.; Dmitriev, M. V.; Maslivets, A. N.; Jasinski, R. *ChemistrySelect*, **2021**, *6*, 6295–6301. doi:10.1002/slct.202101990.
2. Stepanova, E. E.; Dmitriev, M. V.; Maslivets, A. N. *Beilstein J. Org. Chem.*, **2020**, *16*, 2322–2331. doi:10.3762/bjoc.16.193.
3. Gumerova, D. F.; Mashevskaya, I. V.; Maslivets, A. N.; Kozlov, A. P. *Russ. J. Org. Chem.* **2003**, *39*, 995–997. doi:10.1023/B:RUJO.0000003192.96463.ca.
4. Mashevskaya, I. V.; Kol'tsova, S. V.; Maslivets, A. N. *Chem. Heterocycl. Compd.* **2000**, *36*, 1355–1356. doi:10.1023/A:1017500324352.
5. Khramtsova, E. E.; Lystsova, E. A.; Khokhlova, E. V.; Dmitriev, M. V.; Maslivets, A. N. *Molecules*, **2021**, *26*, 7179. doi:10.3390/molecules26237179.
6. CrysAlisPro, Agilent Technologies, Version 1.171.37.33 (release 27-03-2014 CrysAlis171 .NET).
7. Dolomanov, O. V.; Bourhis, L. J.; Gildea, R. J.; Howard, J. A. K.; Puschmann, H. *J. Appl. Cryst.*, **2009**, *42*, 339–341. doi:10.1107/S0021889808042726.
8. Sheldrick, G. M. *Acta Cryst.*, **2008**, *A64*, 112–122. doi:10.1107/S0108767307043930.
9. Palatinus, L.; Chapuis, G. *J. Appl. Cryst.*, **2007**, *40*, 786–790. doi:10.1107/S0021889807029238.
10. Sheldrick, G. M. *Acta Crystallogr., Sect. A: Found. Adv.*, **2015**, *71*, 3–8. doi:10.1107/S2053273314026370.
11. Sheldrick, G. M. *Acta Cryst.*, **2015**, *C71*, 3–8. doi:10.1107/S2053229614024218.
